# Supplementary material for: A network-based, integrative study to identify core biological pathways that drive breast cancer clinical subtypes
Source: PubMed Central journal article supplement (PMC3304402; doi:10.1038/bjc.2011.584), 2012-02-16
Supplement: bjc2011584x4.pdf [file bjc2011584x4.pdf]

Supplemental Table 1: Numbers of samples in 3 subtypes from each of the three datasets.

|                     | ER+ | HER2+ | TN |
|---------------------|-----|-------|----|
| Chin <i>et al.</i>  | 51  | 7     | 20 |
| André <i>et al.</i> | 55  | 11    | 37 |
| Neve <i>et al.</i>  | 11  | 9     | 20 |
