# Supplementary material for: A network-based, integrative study to identify core biological pathways that drive breast cancer clinical subtypes
Source: PubMed Central journal article supplement (PMC3304402; doi:10.1038/bjc.2011.584), 2012-02-16
Supplement: bjc2011584x5.pdf [file bjc2011584x5.pdf]

## Andre et al. dataset

| Gene_no | gene_name | Average_CNA_S<br>core_ER | Average_CNA_<br>Score_HER2 | Average_CNA_<br>Score_TN | Overall_correlation |
|---------|-----------|--------------------------|----------------------------|--------------------------|---------------------|
| 2       | A2M       | 0.00                     | -0.18                      | 0.05                     | 0.24                |
| 9       | NAT1      | -0.16                    | -0.18                      | -0.22                    | 0.04                |
| 10      | NAT2      | -0.16                    | -0.18                      | -0.22                    | 0.02                |
| 12      | SERPINA3  | -0.02                    | 0.00                       | -0.03                    | 0.03                |
| 13      | AADAC     | -0.02                    | -0.09                      | 0.03                     | 0.09                |
| 14      | AAMP      | 0.02                     | 0.00                       | 0.00                     | 0.04                |
| 15      | AANAT     | 0.04                     | 0.09                       | 0.03                     | 0.01                |
| 16      | AARS      | -0.09                    | 0.00                       | 0.03                     | 0.38                |
| 18      | ABAT      | 0.04                     | 0.00                       | 0.00                     | 0.16                |
| 19      | ABCA1     | -0.02                    | 0.00                       | 0.00                     | 0.09                |
| 20      | ABCA2     | 0.02                     | 0.00                       | 0.03                     | 0.17                |
| 21      | ABCA3     | 0.04                     | 0.09                       | 0.00                     | 0.11                |
| 22      | ABCB7     | -0.04                    | 0.00                       | -0.08                    | 0.11                |
| 23      | ABCF1     | 0.00                     | 0.00                       | 0.05                     | 0.15                |
| 24      | ABCA4     | -0.02                    | 0.00                       | 0.00                     | 0.01                |
| 25      | ABL1      | 0.02                     | 0.00                       | 0.03                     | 0.30                |
| 26      | ABP1      | 0.02                     | 0.09                       | 0.00                     | 0.01                |
| 27      | ABL2      | 0.02                     | 0.00                       | 0.03                     | 0.22                |
| 28      | ABO       | 0.02                     | 0.00                       | 0.00                     | -0.06               |
| 29      | ABR       | -0.04                    | 0.00                       | 0.00                     | 0.20                |
| 30      | ACAA1     | 0.00                     | 0.00                       | 0.00                     | 0.01                |
| 31      | ACACA     | 0.00                     | 0.09                       | 0.05                     | 0.26                |
| 32      | ACACB     | 0.00                     | 0.00                       | 0.00                     | NaN                 |
| 33      | ACADL     | 0.00                     | 0.00                       | 0.00                     | NaN                 |
| 34      | ACADM     | -0.02                    | 0.00                       | -0.03                    | 0.02                |
| 35      | ACADS     | 0.00                     | 0.00                       | 0.00                     | NaN                 |
| 36      | ACADSB    | -0.04                    | 0.00                       | 0.03                     | 0.01                |
| 37      | ACADVL    | -0.05                    | 0.00                       | 0.00                     | 0.00                |
| 38      | ACAT1     | -0.07                    | -0.09                      | 0.00                     | 0.03                |
| 39      | ACAT2     | -0.02                    | 0.00                       | -0.05                    | 0.03                |
| 40      | ACCN1     | 0.00                     | 0.09                       | 0.00                     | -0.11               |
| 41      | ACCN2     | 0.02                     | 0.00                       | -0.03                    | 0.01                |
| 43      | ACHE      | 0.02                     | 0.00                       | 0.00                     | 0.30                |
| 47      | ACLY      | -0.04                    | 0.18                       | 0.00                     | 0.20                |
| 48      | ACO1      | -0.05                    | 0.00                       | 0.00                     | 0.08                |
| 49      | ACR       | 0.00                     | 0.09                       | 0.03                     | 0.09                |
| 50      | ACO2      | -0.02                    | 0.00                       | -0.03                    | 0.36                |
| 51      | ACOX1     | 0.04                     | 0.27                       | 0.03                     | 0.44                |
| 52      | ACP1      | -0.02                    | 0.00                       | 0.00                     | 0.13                |
| 53      | ACP2      | -0.02                    | 0.00                       | -0.03                    | 0.15                |
| 54      | ACP5      | 0.00                     | -0.09                      | 0.00                     | 0.01                |
| 55      | ACPP      | 0.00                     | 0.00                       | 0.00                     | NaN                 |
| 56      | ACRV1     | -0.05                    | 0.00                       | -0.03                    | 0.11                |

|     |           |       |       |       |       |
|-----|-----------|-------|-------|-------|-------|
| 58  | ACTA1     | 0.07  | 0.00  | 0.03  | -0.06 |
| 59  | ACTA2     | -0.04 | 0.00  | -0.11 | 0.12  |
| 60  | ACTB      | 0.00  | 0.00  | 0.00  | NaN   |
| 71  | ACTG1     | 0.02  | 0.09  | 0.08  | 0.18  |
| 72  | ACTG2     | 0.00  | 0.00  | 0.00  | NaN   |
| 81  | ACTN4     | 0.02  | 0.09  | 0.05  | 0.42  |
| 87  | ACTN1     | -0.02 | 0.00  | 0.00  | 0.08  |
| 88  | ACTN2     | 0.09  | 0.00  | 0.03  | 0.20  |
| 89  | ACTN3     | 0.05  | 0.00  | 0.03  | 0.05  |
| 90  | ACVR1     | -0.02 | 0.00  | 0.03  | 0.17  |
| 91  | ACVR1B    | 0.02  | 0.00  | -0.03 | 0.09  |
| 93  | ACVR2B    | -0.04 | 0.00  | 0.00  | 0.02  |
| 94  | ACVRL1    | 0.02  | 0.00  | -0.03 | -0.06 |
| 95  | ACY1      | 0.00  | 0.00  | 0.00  | NaN   |
| 97  | ACYP1     | -0.02 | 0.00  | 0.00  | 0.00  |
| 98  | ACYP2     | 0.00  | 0.00  | 0.00  | NaN   |
| 100 | ADA       | 0.02  | 0.09  | 0.03  | 0.02  |
| 101 | ADAM8     | 0.00  | 0.00  | 0.03  | 0.07  |
| 102 | ADAM10    | -0.02 | 0.00  | -0.05 | 0.22  |
| 103 | ADAR      | 0.11  | 0.00  | 0.14  | 0.29  |
| 104 | ADARB1    | 0.00  | 0.00  | 0.00  | 0.13  |
| 107 | ADCY1     | -0.04 | 0.00  | 0.05  | 0.01  |
| 108 | ADCY2     | 0.02  | 0.18  | 0.00  | 0.05  |
| 109 | ADCY3     | -0.02 | 0.00  | 0.03  | 0.17  |
| 112 | ADCY6     | 0.00  | 0.00  | 0.00  | NaN   |
| 113 | ADCY7     | -0.09 | 0.00  | -0.03 | 0.14  |
| 114 | ADCY8     | 0.20  | 0.09  | 0.38  | 0.16  |
| 115 | ADCY9     | 0.04  | 0.00  | 0.00  | 0.25  |
| 116 | ADCYAP1   | 0.04  | -0.09 | 0.00  | 0.23  |
| 117 | ADCYAP1R1 | -0.02 | 0.09  | -0.03 | 0.04  |
| 118 | ADD1      | -0.02 | 0.00  | 0.00  | 0.09  |
| 119 | ADD2      | 0.02  | 0.00  | 0.00  | 0.01  |
| 120 | ADD3      | -0.04 | 0.00  | 0.00  | 0.22  |
| 123 | ADFP      | -0.04 | 0.00  | 0.00  | 0.16  |
| 124 | ADH1A     | -0.02 | 0.00  | 0.03  | 0.03  |
| 125 | ADH1B     | -0.02 | 0.00  | 0.03  | 0.00  |
| 126 | ADH1C     | -0.02 | 0.00  | 0.03  | 0.01  |
| 128 | ADH5      | -0.02 | 0.00  | 0.03  | 0.22  |
| 130 | ADH6      | -0.02 | 0.00  | 0.03  | 0.03  |
| 131 | ADH7      | -0.02 | 0.00  | 0.03  | 0.06  |
| 132 | ADK       | 0.00  | 0.00  | 0.00  | 0.08  |
| 133 | ADM       | -0.04 | -0.09 | -0.03 | -0.12 |
| 134 | ADORA1    | 0.09  | 0.00  | 0.05  | -0.01 |
| 135 | ADORA2A   | 0.00  | 0.00  | 0.03  | 0.11  |
| 136 | ADORA2B   | -0.07 | 0.00  | -0.03 | 0.23  |
| 140 | ADORA3    | 0.02  | 0.00  | -0.03 | -0.02 |
| 141 | ADPRH     | 0.00  | 0.00  | -0.03 | -0.12 |

|     |        |       |       |       |       |
|-----|--------|-------|-------|-------|-------|
| 146 | ADRA1D | 0.02  | 0.00  | -0.03 | 0.03  |
| 147 | ADRA1B | 0.00  | 0.00  | -0.03 | -0.16 |
| 148 | ADRA1A | -0.11 | -0.18 | -0.19 | -0.06 |
| 150 | ADRA2A | -0.04 | 0.00  | 0.00  | 0.01  |
| 151 | ADRA2B | 0.00  | 0.00  | 0.00  | NaN   |
| 152 | ADRA2C | -0.02 | 0.00  | 0.00  | 0.18  |
| 153 | ADRB1  | -0.04 | 0.00  | 0.00  | -0.05 |
| 154 | ADRB2  | 0.00  | 0.00  | 0.00  | NaN   |
| 155 | ADRB3  | 0.16  | 0.09  | 0.08  | -0.13 |
| 156 | ADRBK1 | 0.11  | 0.09  | 0.03  | 0.20  |
| 157 | ADRBK2 | -0.04 | -0.09 | 0.03  | 0.18  |
| 158 | ADSL   | -0.04 | 0.00  | -0.03 | 0.31  |
| 159 | ADSS   | 0.07  | 0.00  | 0.05  | 0.25  |
| 161 | AP2A2  | 0.00  | 0.00  | 0.00  | NaN   |
| 162 | AP1B1  | 0.00  | 0.00  | 0.03  | 0.04  |
| 163 | AP2B1  | -0.02 | -0.09 | 0.03  | 0.17  |
| 164 | AP1G1  | -0.07 | 0.00  | 0.03  | 0.13  |
| 165 | AEBP1  | -0.02 | 0.00  | 0.05  | 0.02  |
| 166 | AES    | 0.00  | 0.00  | 0.00  | NaN   |
| 173 | AFM    | -0.02 | 0.00  | 0.00  | -0.01 |
| 174 | AFP    | -0.02 | 0.00  | 0.00  | 0.00  |
| 175 | AGA    | -0.02 | 0.00  | -0.05 | 0.06  |
| 176 | AGC1   | 0.00  | 0.00  | -0.05 | 0.02  |
| 177 | AGER   | 0.00  | 0.00  | 0.05  | 0.01  |
| 178 | AGL    | -0.02 | 0.00  | -0.03 | 0.20  |
| 181 | AGRP   | -0.04 | 0.00  | 0.00  | -0.01 |
| 182 | JAG1   | 0.00  | 0.00  | -0.05 | 0.27  |
| 183 | AGT    | 0.09  | 0.00  | 0.03  | 0.06  |
| 185 | AGTR1  | 0.02  | 0.00  | 0.05  | 0.00  |
| 186 | AGTR2  | -0.05 | 0.09  | -0.08 | -0.02 |
| 187 | AGTRL1 | 0.00  | -0.09 | 0.03  | -0.08 |
| 189 | AGXT   | 0.00  | 0.00  | 0.00  | NaN   |
| 190 | NROB1  | -0.07 | 0.00  | -0.11 | -0.02 |
| 191 | AHCY   | 0.00  | 0.00  | 0.00  | NaN   |
| 195 | AHNAK  | -0.02 | 0.00  | 0.03  | 0.01  |
| 196 | AHR    | 0.00  | 0.00  | 0.00  | 0.21  |
| 197 | AHSG   | 0.04  | 0.00  | 0.03  | 0.07  |
| 199 | AIF1   | 0.00  | 0.00  | 0.05  | 0.02  |
| 203 | AK1    | 0.00  | 0.00  | 0.00  | 0.14  |
| 204 | AK2    | -0.02 | 0.00  | 0.00  | 0.23  |
| 205 | AK3    | -0.05 | 0.00  | -0.05 | 0.18  |
| 207 | AKT1   | -0.05 | -0.09 | 0.08  | 0.01  |
| 208 | AKT2   | 0.00  | 0.00  | 0.05  | 0.03  |
| 210 | ALAD   | -0.02 | 0.00  | 0.00  | 0.07  |
| 211 | ALAS1  | 0.00  | 0.00  | 0.00  | NaN   |
| 214 | ALCAM  | 0.00  | 0.00  | -0.05 | 0.19  |
| 215 | ABCD1  | 0.00  | 0.00  | -0.03 | -0.17 |

|     |         |       |       |       |       |
|-----|---------|-------|-------|-------|-------|
| 216 | ALDH1A1 | -0.02 | 0.00  | -0.03 | 0.07  |
| 217 | ALDH2   | 0.00  | 0.00  | 0.00  | NaN   |
| 218 | ALDH3A1 | -0.04 | 0.09  | 0.03  | 0.13  |
| 219 | ALDH1B1 | -0.04 | 0.00  | 0.03  | 0.29  |
| 220 | ALDH1A3 | 0.00  | 0.00  | 0.00  | -0.12 |
| 221 | ALDH3B1 | 0.07  | 0.09  | 0.03  | 0.17  |
| 222 | ALDH3B2 | 0.05  | 0.09  | 0.03  | 0.09  |
| 223 | ALDH9A1 | 0.04  | 0.00  | 0.08  | 0.16  |
| 224 | ALDH3A2 | -0.04 | 0.09  | 0.03  | 0.36  |
| 225 | ABCD2   | 0.00  | 0.09  | 0.00  | -0.06 |
| 229 | ALDOB   | -0.02 | 0.00  | 0.00  | 0.01  |
| 230 | ALDOC   | 0.04  | 0.09  | 0.00  | 0.29  |
| 231 | AKR1B1  | 0.02  | 0.00  | 0.00  | -0.03 |
| 238 | ALK     | 0.00  | 0.00  | 0.00  | NaN   |
| 239 | ALOX12  | -0.05 | 0.00  | 0.00  | -0.10 |
| 240 | ALOX5   | -0.02 | 0.09  | 0.03  | 0.18  |
| 241 | ALOX5AP | -0.05 | 0.00  | -0.05 | 0.18  |
| 242 | ALOX12B | -0.05 | 0.00  | 0.00  | -0.11 |
| 246 | ALOX15  | -0.04 | 0.00  | 0.00  | 0.00  |
| 247 | ALOX15B | -0.05 | 0.00  | 0.00  | -0.09 |
| 249 | ALPL    | 0.00  | 0.00  | 0.00  | NaN   |
| 251 | ALPPL2  | 0.02  | 0.00  | 0.00  | -0.03 |
| 257 | ALX3    | 0.00  | 0.00  | -0.03 | -0.02 |
| 258 | AMBN    | -0.02 | 0.00  | 0.00  | -0.02 |
| 259 | AMBP    | -0.02 | 0.00  | 0.00  | 0.07  |
| 262 | AMD1    | 0.02  | 0.00  | 0.03  | 0.49  |
| 266 | AMELY   | 0.00  | 0.00  | -0.03 | 0.01  |
| 267 | AMFR    | -0.05 | 0.00  | 0.00  | 0.11  |
| 268 | AMH     | 0.00  | 0.00  | -0.03 | -0.05 |
| 269 | AMHR2   | 0.02  | 0.09  | -0.03 | -0.10 |
| 270 | AMPD1   | 0.00  | 0.00  | -0.03 | 0.01  |
| 271 | AMPD2   | 0.00  | 0.00  | -0.03 | -0.04 |
| 272 | AMPD3   | 0.00  | 0.00  | -0.05 | -0.05 |
| 273 | AMPH    | -0.02 | 0.00  | 0.00  | 0.15  |
| 274 | BIN1    | 0.00  | 0.00  | 0.00  | NaN   |
| 275 | AMT     | 0.00  | 0.00  | 0.00  | NaN   |
| 276 | AMY1A   | -0.16 | -0.09 | -0.08 | 0.11  |
| 284 | ANGPT1  | 0.20  | 0.09  | 0.30  | 0.18  |
| 286 | ANK1    | 0.05  | 0.09  | 0.14  | 0.18  |
| 287 | ANK2    | -0.02 | 0.00  | 0.00  | 0.13  |
| 288 | ANK3    | 0.00  | 0.00  | -0.05 | 0.20  |
| 290 | ANPEP   | 0.02  | 0.00  | -0.03 | 0.02  |
| 291 | SLC25A4 | -0.02 | 0.00  | -0.05 | 0.14  |
| 292 | SLC25A5 | -0.05 | 0.00  | -0.08 | 0.24  |
| 301 | ANXA1   | -0.02 | 0.00  | 0.00  | 0.07  |
| 302 | ANXA2   | -0.02 | 0.00  | -0.05 | 0.11  |
| 306 | ANXA3   | -0.04 | 0.00  | -0.03 | 0.04  |

|     |         |       |       |       |       |
|-----|---------|-------|-------|-------|-------|
| 307 | ANXA4   | 0.02  | 0.00  | 0.00  | 0.08  |
| 308 | ANXA5   | 0.00  | 0.00  | -0.03 | 0.04  |
| 309 | ANXA6   | 0.00  | 0.00  | 0.00  | NaN   |
| 310 | ANXA7   | -0.02 | 0.00  | 0.00  | 0.21  |
| 311 | ANXA11  | 0.00  | 0.00  | 0.00  | 0.22  |
| 312 | ANXA13  | 0.18  | 0.09  | 0.38  | -0.08 |
| 313 | AOAH    | -0.02 | 0.00  | -0.03 | 0.00  |
| 314 | AOC2    | -0.04 | 0.00  | 0.00  | 0.07  |
| 316 | AOX1    | 0.00  | 0.00  | 0.00  | NaN   |
| 317 | APAF1   | 0.00  | 0.00  | 0.00  | NaN   |
| 318 | NUDT2   | 0.00  | 0.00  | 0.00  | 0.04  |
| 319 | APOF    | 0.00  | 0.00  | 0.00  | NaN   |
| 320 | APBA1   | -0.02 | 0.00  | -0.03 | -0.02 |
| 321 | APBA2   | -0.04 | 0.09  | -0.14 | 0.17  |
| 322 | APBB1   | -0.02 | 0.00  | -0.03 | 0.16  |
| 323 | APBB2   | -0.05 | 0.00  | -0.08 | 0.23  |
| 324 | APC     | 0.00  | 0.00  | -0.05 | 0.17  |
| 325 | APCS    | 0.07  | 0.00  | 0.16  | 0.03  |
| 326 | AIRE    | 0.00  | 0.00  | 0.00  | -0.11 |
| 327 | APEH    | 0.00  | 0.00  | 0.00  | NaN   |
| 329 | BIRC2   | -0.05 | -0.09 | 0.00  | 0.22  |
| 330 | BIRC3   | -0.05 | -0.09 | 0.00  | 0.10  |
| 331 | BIRC4   | -0.05 | 0.00  | -0.08 | 0.07  |
| 332 | BIRC5   | 0.05  | 0.09  | 0.03  | 0.27  |
| 333 | APLP1   | 0.00  | 0.09  | 0.05  | 0.05  |
| 334 | APLP2   | -0.05 | 0.00  | -0.03 | 0.17  |
| 336 | APOA2   | 0.11  | 0.00  | 0.14  | 0.12  |
| 338 | APOB    | 0.00  | 0.00  | 0.00  | NaN   |
| 339 | APOBEC1 | 0.00  | 0.00  | 0.05  | -0.05 |
| 341 | APOC1   | -0.02 | 0.00  | -0.03 | 0.17  |
| 343 | AQP8    | 0.02  | 0.00  | 0.00  | -0.10 |
| 344 | APOC2   | -0.02 | 0.00  | -0.03 | 0.09  |
| 346 | APOC4   | -0.02 | 0.00  | -0.03 | -0.14 |
| 348 | APOE    | -0.02 | 0.00  | -0.03 | 0.31  |
| 350 | APOH    | 0.07  | 0.18  | 0.03  | 0.16  |
| 351 | APP     | 0.00  | 0.00  | 0.03  | 0.13  |
| 354 | KLK3    | 0.00  | 0.00  | -0.03 | 0.03  |
| 358 | AQP1    | -0.02 | 0.09  | -0.03 | -0.12 |
| 359 | AQP2    | 0.02  | 0.00  | -0.03 | -0.05 |
| 360 | AQP3    | 0.00  | 0.09  | 0.00  | 0.16  |
| 361 | AQP4    | 0.02  | -0.09 | 0.00  | 0.12  |
| 363 | AQP6    | 0.02  | 0.00  | -0.03 | -0.08 |
| 366 | AQP9    | -0.02 | 0.00  | -0.05 | 0.11  |
| 367 | AR      | -0.04 | 0.00  | -0.05 | 0.00  |
| 368 | ABCC6   | 0.02  | 0.09  | 0.00  | 0.13  |
| 372 | ARCN1   | -0.05 | 0.00  | 0.00  | -0.01 |
| 375 | ARF1    | 0.11  | 0.00  | 0.03  | -0.11 |

|     |          |       |       |       |       |
|-----|----------|-------|-------|-------|-------|
| 377 | ARF3     | 0.00  | 0.00  | 0.00  | NaN   |
| 378 | ARF4     | -0.05 | 0.00  | 0.00  | 0.15  |
| 381 | ARF5     | 0.02  | 0.00  | -0.03 | 0.19  |
| 383 | ARG1     | 0.00  | 0.00  | 0.08  | 0.12  |
| 384 | ARG2     | -0.02 | 0.00  | 0.00  | 0.03  |
| 392 | ARHGAP1  | -0.02 | 0.09  | 0.03  | 0.22  |
| 393 | ARHGAP4  | 0.00  | 0.00  | -0.03 | 0.08  |
| 394 | ARHGAP5  | -0.02 | 0.09  | 0.00  | -0.13 |
| 395 | ARHGAP6  | -0.05 | -0.09 | -0.14 | 0.06  |
| 397 | ARHGDIB  | 0.00  | -0.09 | 0.05  | -0.07 |
| 398 | ARHGDIG  | 0.05  | 0.18  | 0.05  | 0.05  |
| 400 | ARL1     | 0.00  | 0.00  | 0.03  | 0.16  |
| 402 | ARL2     | 0.02  | 0.00  | 0.03  | 0.23  |
| 403 | ARL3     | 0.00  | 0.00  | -0.03 | 0.20  |
| 405 | ARNT     | 0.07  | 0.09  | 0.16  | 0.32  |
| 406 | ARNTL    | 0.00  | 0.00  | -0.05 | 0.08  |
| 407 | ARR3     | -0.04 | 0.00  | -0.08 | 0.16  |
| 408 | ARRB1    | 0.07  | 0.09  | 0.00  | 0.02  |
| 409 | ARRB2    | -0.04 | 0.00  | 0.00  | 0.23  |
| 410 | ARSA     | 0.00  | 0.09  | 0.03  | 0.03  |
| 411 | ARSB     | 0.00  | 0.09  | -0.14 | -0.02 |
| 412 | STS      | -0.05 | -0.09 | -0.14 | 0.09  |
| 414 | ARSD     | -0.05 | -0.09 | -0.08 | 0.07  |
| 415 | ARSE     | -0.05 | -0.09 | -0.08 | 0.06  |
| 416 | ARSF     | -0.05 | -0.09 | -0.08 | 0.04  |
| 417 | ART1     | -0.02 | 0.00  | -0.03 | 0.19  |
| 419 | ART3     | -0.02 | 0.00  | 0.00  | 0.00  |
| 421 | ARVCF    | -0.02 | 0.00  | 0.08  | 0.03  |
| 429 | ASCL1    | 0.00  | 0.00  | 0.03  | 0.14  |
| 430 | ASCL2    | 0.00  | 0.00  | 0.00  | NaN   |
| 432 | ASGR1    | -0.05 | 0.00  | 0.00  | 0.15  |
| 433 | ASGR2    | -0.05 | 0.00  | 0.00  | -0.05 |
| 434 | ASIP     | 0.00  | 0.00  | 0.00  | NaN   |
| 435 | ASL      | 0.00  | 0.00  | 0.05  | 0.20  |
| 439 | ASNA1    | 0.02  | -0.09 | 0.00  | 0.36  |
| 440 | ASNS     | 0.02  | 0.00  | 0.00  | 0.02  |
| 443 | ASPA     | -0.04 | 0.00  | 0.00  | 0.00  |
| 444 | ASPH     | 0.13  | 0.00  | 0.14  | 0.28  |
| 462 | SERPINC1 | 0.00  | 0.00  | 0.05  | 0.09  |
| 463 | ATBF1    | -0.07 | 0.00  | 0.00  | 0.10  |
| 466 | ATF1     | 0.02  | 0.00  | -0.03 | 0.17  |
| 467 | ATF3     | 0.07  | 0.00  | 0.00  | -0.01 |
| 468 | ATF4     | -0.04 | 0.00  | -0.03 | 0.25  |
| 471 | ATIC     | 0.00  | 0.00  | 0.00  | NaN   |
| 472 | ATM      | -0.07 | -0.09 | 0.00  | 0.16  |
| 473 | RERE     | -0.02 | 0.00  | 0.00  | 0.11  |
| 474 | ATOH1    | -0.04 | 0.00  | -0.03 | 0.09  |

|     |          |       |       |       |       |
|-----|----------|-------|-------|-------|-------|
| 475 | ATOX1    | 0.00  | 0.00  | 0.00  | NaN   |
| 476 | ATP1A1   | 0.02  | 0.00  | -0.03 | 0.12  |
| 477 | ATP1A2   | 0.05  | 0.00  | 0.14  | 0.06  |
| 478 | ATP1A3   | 0.02  | 0.00  | -0.03 | 0.13  |
| 479 | ATP12A   | -0.05 | 0.00  | -0.08 | -0.04 |
| 481 | ATP1B1   | 0.02  | 0.00  | 0.05  | 0.19  |
| 482 | ATP1B2   | -0.07 | 0.00  | 0.00  | -0.09 |
| 483 | ATP1B3   | 0.02  | 0.00  | 0.03  | 0.17  |
| 486 | FXVD2    | -0.05 | 0.00  | 0.00  | 0.21  |
| 487 | ATP2A1   | 0.05  | 0.00  | 0.00  | -0.08 |
| 488 | ATP2A2   | 0.00  | 0.00  | 0.00  | NaN   |
| 489 | ATP2A3   | -0.04 | 0.00  | 0.00  | 0.07  |
| 490 | ATP2B1   | 0.00  | 0.00  | 0.00  | NaN   |
| 491 | ATP2B2   | -0.02 | 0.00  | 0.00  | 0.02  |
| 492 | ATP2B3   | 0.00  | 0.00  | 0.00  | 0.11  |
| 493 | ATP2B4   | 0.07  | 0.00  | 0.05  | 0.02  |
| 495 | ATP4A    | 0.02  | 0.09  | 0.05  | 0.09  |
| 496 | ATP4B    | 0.00  | 0.00  | 0.00  | 0.29  |
| 498 | ATP5A1   | 0.00  | -0.09 | -0.03 | 0.12  |
| 501 | ALDH7A1  | 0.00  | 0.00  | -0.05 | 0.10  |
| 506 | ATP5B    | 0.00  | 0.00  | 0.00  | NaN   |
| 513 | ATP5D    | 0.00  | 0.00  | -0.03 | 0.26  |
| 514 | ATP5E    | 0.05  | 0.09  | 0.03  | 0.28  |
| 515 | ATP5F1   | 0.02  | 0.00  | -0.03 | -0.06 |
| 516 | ATP5G1   | 0.05  | 0.18  | 0.00  | 0.44  |
| 517 | ATP5G2   | 0.02  | 0.09  | -0.03 | 0.24  |
| 518 | ATP5G3   | -0.02 | 0.00  | 0.00  | 0.10  |
| 521 | ATP5I    | -0.02 | 0.00  | -0.03 | 0.08  |
| 522 | ATP5J    | 0.00  | 0.00  | 0.03  | 0.08  |
| 525 | ATP6V1B1 | 0.02  | 0.00  | 0.00  | 0.07  |
| 526 | ATP6V1B2 | -0.15 | -0.18 | -0.22 | 0.30  |
| 527 | ATP6V0C  | 0.04  | 0.09  | 0.00  | 0.22  |
| 528 | ATP6V1C1 | 0.22  | 0.09  | 0.32  | 0.40  |
| 533 | ATP6V0B  | 0.00  | 0.00  | 0.03  | 0.29  |
| 534 | ATP6V1G2 | 0.00  | 0.00  | 0.05  | 0.01  |
| 535 | ATP6V0A1 | -0.04 | 0.00  | 0.00  | -0.14 |
| 539 | ATP5O    | 0.00  | 0.00  | 0.00  | 0.07  |
| 540 | ATP7B    | -0.07 | 0.00  | -0.08 | 0.13  |
| 545 | ATR      | 0.02  | 0.00  | 0.03  | 0.39  |
| 546 | ATRX     | -0.04 | 0.00  | -0.08 | 0.04  |
| 549 | AUH      | -0.02 | 0.00  | 0.00  | -0.03 |
| 550 | AUP1     | 0.00  | 0.00  | 0.00  | NaN   |
| 551 | AVP      | 0.00  | 0.00  | 0.00  | 0.10  |
| 552 | AVPR1A   | 0.00  | 0.00  | 0.03  | 0.09  |
| 554 | AVPR2    | 0.00  | 0.00  | -0.03 | -0.01 |
| 558 | AXL      | 0.00  | 0.00  | -0.03 | -0.11 |
| 563 | AZGP1    | 0.02  | 0.00  | 0.00  | -0.10 |

|     |          |       |       |       |       |
|-----|----------|-------|-------|-------|-------|
| 566 | AZU1     | 0.00  | 0.00  | -0.03 | -0.07 |
| 567 | B2M      | -0.04 | 0.00  | -0.14 | 0.15  |
| 570 | BAAT     | -0.02 | 0.00  | 0.00  | -0.17 |
| 571 | BACH1    | -0.02 | 0.00  | 0.05  | 0.22  |
| 572 | BAD      | 0.00  | 0.00  | 0.03  | 0.13  |
| 573 | BAG1     | 0.00  | 0.09  | 0.00  | 0.03  |
| 575 | BAI1     | 0.16  | 0.09  | 0.41  | 0.03  |
| 576 | BAI2     | 0.02  | 0.09  | 0.00  | 0.05  |
| 577 | BAI3     | -0.02 | 0.00  | 0.05  | 0.02  |
| 578 | BAK1     | 0.00  | 0.00  | 0.05  | 0.06  |
| 579 | BAPX1    | -0.04 | 0.00  | -0.05 | -0.20 |
| 580 | BARD1    | 0.00  | 0.00  | 0.00  | NaN   |
| 581 | BAX      | 0.00  | 0.00  | -0.03 | 0.22  |
| 585 | BBS4     | 0.00  | 0.00  | -0.05 | 0.16  |
| 586 | BCAT1    | 0.00  | -0.09 | 0.08  | 0.02  |
| 587 | BCAT2    | 0.00  | 0.00  | -0.03 | 0.26  |
| 590 | BCHE     | 0.02  | 0.09  | 0.00  | 0.08  |
| 593 | BCKDHA   | 0.02  | 0.00  | -0.03 | 0.28  |
| 594 | BCKDHB   | -0.02 | 0.00  | -0.03 | 0.25  |
| 595 | CCND1    | 0.22  | 0.18  | 0.05  | 0.36  |
| 596 | BCL2     | -0.02 | -0.09 | 0.00  | 0.18  |
| 597 | BCL2A1   | 0.00  | 0.00  | -0.03 | -0.12 |
| 598 | BCL2L1   | 0.00  | 0.00  | 0.03  | -0.22 |
| 599 | BCL2L2   | 0.00  | 0.00  | 0.00  | 0.21  |
| 602 | BCL3     | -0.02 | 0.00  | -0.03 | 0.14  |
| 604 | BCL6     | 0.04  | 0.00  | 0.03  | -0.05 |
| 605 | BCL7A    | 0.02  | 0.00  | 0.00  | 0.19  |
| 607 | BCL9     | 0.07  | 0.00  | 0.11  | 0.13  |
| 608 | TNFRSF17 | 0.04  | 0.00  | 0.00  | -0.10 |
| 610 | HCN2     | 0.00  | 0.00  | -0.03 | 0.09  |
| 611 | OPN1SW   | 0.02  | 0.00  | -0.03 | 0.00  |
| 613 | BCR      | -0.02 | 0.00  | 0.03  | -0.37 |
| 617 | BCS1L    | 0.00  | 0.00  | 0.00  | NaN   |
| 623 | BDKRB1   | 0.00  | 0.00  | 0.03  | 0.07  |
| 624 | BDKRB2   | 0.00  | 0.00  | 0.03  | 0.41  |
| 627 | BDNF     | 0.00  | 0.00  | -0.03 | 0.13  |
| 631 | BFSP1    | 0.00  | 0.00  | -0.08 | 0.21  |
| 633 | BGN      | 0.00  | 0.00  | 0.00  | 0.04  |
| 634 | CEACAM1  | 0.02  | 0.00  | -0.03 | -0.10 |
| 635 | BHMT     | 0.00  | 0.09  | -0.14 | -0.02 |
| 636 | BICD1    | 0.00  | -0.09 | 0.05  | 0.01  |
| 637 | BID      | -0.02 | 0.00  | 0.00  | 0.10  |
| 638 | BIK      | -0.02 | 0.00  | -0.03 | 0.02  |
| 640 | BLK      | -0.16 | -0.09 | -0.22 | 0.06  |
| 641 | BLM      | 0.02  | 0.00  | 0.00  | 0.15  |
| 642 | BLMH     | 0.04  | 0.09  | 0.00  | 0.28  |
| 643 | BLR1     | -0.05 | 0.00  | 0.00  | 0.18  |



|     |          |       |       |       |       |
|-----|----------|-------|-------|-------|-------|
| 644 | BLVRA    | -0.02 | 0.00  | 0.05  | -0.05 |
| 645 | BLVRB    | 0.00  | 0.09  | 0.05  | -0.17 |
| 648 | BMI1     | -0.02 | 0.00  | 0.05  | 0.03  |
| 649 | BMP1     | -0.13 | -0.18 | -0.22 | 0.11  |
| 650 | BMP2     | 0.00  | 0.00  | -0.05 | -0.14 |
| 651 | BMP3     | -0.04 | 0.00  | -0.03 | -0.06 |
| 652 | BMP4     | 0.00  | 0.00  | 0.00  | 0.22  |
| 653 | BMP5     | -0.04 | 0.00  | 0.08  | -0.02 |
| 654 | BMP6     | -0.02 | 0.00  | 0.05  | 0.12  |
| 655 | BMP7     | 0.07  | 0.09  | 0.05  | 0.11  |
| 657 | BMPR1A   | -0.02 | 0.00  | -0.03 | 0.15  |
| 658 | BMPR1B   | -0.04 | 0.00  | 0.00  | -0.09 |
| 659 | BMPR2    | 0.00  | 0.00  | 0.00  | NaN   |
| 660 | BMX      | -0.05 | 0.00  | -0.14 | 0.13  |
| 662 | BNIP1    | 0.00  | 0.00  | -0.03 | 0.21  |
| 663 | BNIP2    | -0.02 | 0.00  | -0.05 | 0.14  |
| 664 | BNIP3    | -0.04 | 0.00  | 0.00  | 0.10  |
| 665 | BNIP3L   | -0.11 | -0.18 | -0.19 | 0.13  |
| 666 | BOK      | 0.00  | 0.00  | 0.00  | NaN   |
| 668 | FOXL2    | 0.02  | 0.00  | 0.00  | -0.06 |
| 669 | BPGM     | 0.02  | 0.00  | 0.00  | 0.10  |
| 670 | BPHL     | -0.02 | 0.00  | 0.00  | 0.03  |
| 671 | BPI      | 0.02  | 0.00  | 0.03  | 0.04  |
| 672 | BRCA1    | -0.04 | 0.00  | -0.03 | 0.19  |
| 673 | BRAF     | 0.02  | 0.00  | 0.00  | 0.00  |
| 675 | BRCA2    | -0.05 | 0.00  | -0.08 | 0.20  |
| 676 | BRDT     | -0.02 | 0.00  | -0.03 | -0.02 |
| 677 | ZFP36L1  | -0.02 | 0.00  | 0.00  | 0.15  |
| 682 | BSG      | 0.00  | 0.00  | -0.03 | 0.09  |
| 683 | BST1     | -0.04 | -0.09 | -0.05 | 0.10  |
| 684 | BST2     | 0.05  | 0.00  | 0.00  | 0.03  |
| 685 | BTC      | -0.02 | 0.00  | 0.00  | -0.04 |
| 686 | BTD      | -0.02 | 0.00  | 0.00  | 0.28  |
| 688 | KLF5     | -0.07 | -0.09 | -0.14 | 0.05  |
| 689 | BTF3     | 0.00  | 0.00  | -0.11 | 0.19  |
| 694 | BTG1     | 0.00  | 0.09  | 0.00  | -0.04 |
| 695 | BTK      | -0.05 | 0.00  | -0.08 | 0.21  |
| 696 | BTN1A1   | 0.00  | 0.00  | 0.03  | -0.13 |
| 699 | BUB1     | 0.00  | 0.00  | 0.00  | NaN   |
| 701 | BUB1B    | -0.02 | 0.00  | -0.14 | -0.04 |
| 705 | BYSL     | 0.00  | 0.00  | 0.08  | 0.24  |
| 708 | C1QBP    | -0.04 | 0.00  | 0.00  | 0.13  |
| 710 | SERPING1 | 0.02  | 0.00  | 0.05  | -0.02 |
| 712 | C1QA     | 0.00  | 0.00  | 0.00  | NaN   |
| 713 | C1QB     | 0.00  | 0.00  | 0.00  | NaN   |
| 715 | C1R      | -0.02 | 0.09  | 0.05  | 0.11  |
| 716 | C1S      | -0.02 | 0.09  | 0.05  | 0.16  |

|     |          |       |       |       |       |
|-----|----------|-------|-------|-------|-------|
| 717 | C2       | 0.00  | 0.00  | 0.05  | 0.00  |
| 718 | C3       | 0.00  | -0.09 | 0.00  | -0.01 |
| 719 | C3AR1    | 0.00  | -0.09 | 0.05  | 0.17  |
| 722 | C4BPA    | 0.09  | 0.00  | 0.00  | -0.02 |
| 725 | C4BPB    | 0.09  | 0.00  | 0.00  | -0.19 |
| 726 | CAPN5    | 0.07  | 0.18  | 0.03  | 0.09  |
| 727 | C5       | -0.02 | 0.00  | 0.00  | -0.02 |
| 729 | C6       | 0.04  | 0.18  | 0.00  | -0.05 |
| 730 | C7       | 0.04  | 0.18  | 0.00  | -0.01 |
| 731 | C8A      | 0.00  | 0.00  | 0.00  | -0.01 |
| 732 | C8B      | 0.00  | 0.00  | 0.00  | -0.07 |
| 733 | C8G      | 0.02  | 0.00  | 0.03  | -0.06 |
| 735 | C9       | 0.04  | 0.09  | 0.00  | 0.07  |
| 738 | C11orf2  | 0.02  | 0.00  | 0.03  | 0.32  |
| 740 | MRPL49   | 0.02  | 0.00  | 0.03  | 0.14  |
| 745 | C11orf9  | -0.02 | 0.00  | 0.03  | 0.20  |
| 746 | C11orf10 | -0.02 | 0.00  | 0.03  | 0.13  |
| 747 | C11orf11 | -0.02 | 0.00  | 0.03  | 0.03  |
| 753 | C18orf1  | -0.02 | -0.09 | 0.00  | -0.08 |
| 754 | PTTG1IP  | 0.00  | 0.00  | 0.00  | 0.29  |
| 755 | C21orf2  | 0.00  | 0.00  | 0.00  | 0.33  |
| 759 | CA1      | 0.15  | 0.00  | 0.14  | 0.09  |
| 760 | CA2      | 0.15  | 0.00  | 0.14  | 0.03  |
| 761 | CA3      | 0.15  | 0.00  | 0.14  | -0.06 |
| 762 | CA4      | 0.20  | 0.00  | 0.03  | 0.01  |
| 763 | CA5A     | -0.04 | 0.00  | 0.00  | 0.07  |
| 765 | CA6      | -0.02 | 0.00  | 0.00  | 0.01  |
| 766 | CA7      | -0.09 | 0.00  | 0.00  | -0.04 |
| 767 | CA8      | 0.16  | 0.00  | 0.14  | 0.34  |
| 768 | CA9      | 0.00  | 0.00  | 0.00  | 0.15  |
| 770 | CA11     | 0.00  | 0.00  | -0.03 | -0.08 |
| 771 | CA12     | 0.02  | 0.09  | -0.08 | 0.25  |
| 773 | CACNA1A  | 0.00  | -0.09 | 0.00  | 0.07  |
| 774 | CACNA1B  | 0.02  | 0.00  | 0.05  | 0.05  |
| 775 | CACNA1C  | -0.02 | 0.09  | 0.08  | 0.17  |
| 776 | CACNA1D  | -0.02 | 0.00  | 0.00  | 0.28  |
| 777 | CACNA1E  | 0.04  | 0.00  | 0.03  | 0.03  |
| 778 | CACNA1F  | -0.04 | 0.00  | -0.05 | 0.12  |
| 779 | CACNA1S  | 0.07  | 0.00  | 0.05  | 0.03  |
| 780 | DDR1     | 0.02  | 0.00  | 0.05  | 0.07  |
| 781 | CACNA2D1 | 0.02  | 0.00  | 0.00  | 0.02  |
| 782 | CACNB1   | 0.00  | 0.55  | 0.05  | 0.18  |
| 783 | CACNB2   | -0.02 | 0.00  | 0.11  | 0.12  |
| 784 | CACNB3   | 0.00  | 0.00  | 0.00  | NaN   |
| 785 | CACNB4   | -0.02 | 0.00  | 0.03  | 0.00  |
| 786 | CACNG1   | 0.13  | 0.27  | 0.03  | 0.05  |
| 788 | SLC25A20 | -0.04 | 0.00  | 0.00  | 0.12  |

|     |        |       |       |       |       |
|-----|--------|-------|-------|-------|-------|
| 790 | CAD    | 0.00  | 0.00  | 0.00  | NaN   |
| 793 | CALB1  | 0.15  | 0.00  | 0.19  | 0.17  |
| 794 | CALB2  | -0.07 | 0.00  | 0.03  | 0.13  |
| 796 | CALCA  | -0.02 | 0.00  | -0.05 | 0.10  |
| 797 | CALCB  | -0.02 | 0.00  | -0.05 | -0.04 |
| 799 | CALCR  | 0.02  | 0.00  | 0.03  | -0.02 |
| 800 | CALD1  | 0.02  | 0.00  | 0.00  | 0.04  |
| 801 | CALM1  | -0.02 | 0.00  | 0.03  | 0.40  |
| 805 | CALM2  | 0.02  | 0.00  | 0.00  | 0.12  |
| 808 | CALM3  | -0.02 | 0.00  | -0.03 | 0.37  |
| 811 | CALR   | 0.00  | -0.09 | 0.00  | 0.13  |
| 813 | CALU   | 0.02  | 0.00  | -0.03 | 0.13  |
| 814 | CAMK4  | 0.00  | 0.00  | -0.08 | -0.04 |
| 815 | CAMK2A | 0.00  | 0.00  | 0.00  | NaN   |
| 816 | CAMK2B | -0.02 | 0.00  | 0.05  | 0.01  |
| 818 | CAMK2G | 0.04  | 0.00  | 0.00  | 0.36  |
| 819 | CAMLG  | 0.00  | 0.00  | -0.03 | 0.15  |
| 820 | CAMP   | -0.04 | 0.00  | 0.00  | 0.07  |
| 821 | CANX   | 0.02  | 0.00  | -0.03 | 0.22  |
| 822 | CAPG   | 0.00  | 0.00  | 0.00  | NaN   |
| 823 | CAPN1  | 0.02  | 0.00  | 0.03  | 0.10  |
| 824 | CAPN2  | 0.07  | 0.00  | 0.00  | 0.06  |
| 825 | CAPN3  | -0.05 | 0.09  | -0.14 | 0.08  |
| 826 | CAPNS1 | -0.02 | 0.09  | 0.08  | -0.04 |
| 827 | CAPN6  | -0.05 | 0.00  | -0.08 | 0.09  |
| 829 | CAPZA1 | 0.02  | 0.00  | -0.03 | 0.06  |
| 830 | CAPZA2 | 0.00  | 0.00  | -0.03 | 0.13  |
| 831 | CAST   | 0.00  | 0.00  | -0.14 | 0.12  |
| 832 | CAPZB  | 0.00  | 0.00  | 0.00  | NaN   |
| 833 | CARS   | -0.02 | 0.00  | -0.03 | 0.11  |
| 834 | CASP1  | -0.07 | 0.00  | 0.00  | 0.31  |
| 835 | CASP2  | 0.02  | 0.00  | 0.00  | 0.08  |
| 836 | CASP3  | -0.02 | 0.00  | -0.05 | 0.19  |
| 837 | CASP4  | -0.07 | 0.00  | 0.00  | 0.03  |
| 838 | CASP5  | -0.07 | 0.00  | 0.00  | 0.10  |
| 839 | CASP6  | -0.02 | 0.00  | 0.00  | -0.07 |
| 840 | CASP7  | -0.04 | 0.00  | 0.00  | -0.07 |
| 841 | CASP8  | 0.00  | 0.00  | 0.00  | NaN   |
| 842 | CASP9  | -0.02 | 0.00  | 0.00  | 0.24  |
| 843 | CASP10 | 0.00  | 0.00  | 0.00  | NaN   |
| 844 | CASQ1  | 0.05  | 0.00  | 0.14  | -0.03 |
| 845 | CASQ2  | 0.00  | 0.00  | -0.03 | 0.00  |
| 846 | CASR   | 0.00  | 0.00  | -0.03 | -0.19 |
| 847 | CAT    | 0.04  | 0.00  | -0.03 | 0.29  |
| 857 | CAV1   | 0.00  | 0.00  | -0.03 | 0.15  |
| 858 | CAV2   | 0.00  | 0.00  | -0.03 | 0.04  |
| 859 | CAV3   | 0.00  | 0.00  | 0.00  | 0.09  |

|     |          |       |       |       |       |
|-----|----------|-------|-------|-------|-------|
| 860 | RUNX2    | 0.00  | 0.00  | 0.05  | 0.01  |
| 861 | RUNX1    | 0.02  | 0.00  | 0.00  | 0.18  |
| 863 | CBFA2T3  | -0.02 | 0.09  | 0.11  | -0.09 |
| 864 | RUNX3    | 0.00  | 0.00  | 0.00  | NaN   |
| 865 | CBFB     | -0.05 | 0.00  | 0.00  | 0.26  |
| 866 | SERPINA6 | -0.02 | 0.00  | 0.00  | -0.01 |
| 867 | CBL      | -0.05 | 0.00  | 0.00  | 0.03  |
| 868 | CBLB     | 0.00  | 0.00  | -0.05 | 0.01  |
| 869 | CBLN1    | -0.07 | 0.00  | 0.00  | -0.02 |
| 871 | SERPINH1 | 0.07  | 0.09  | 0.00  | 0.29  |
| 873 | CBR1     | 0.00  | 0.00  | 0.00  | 0.16  |
| 874 | CBR3     | 0.00  | 0.00  | 0.00  | -0.06 |
| 875 | CBS      | 0.00  | 0.00  | 0.00  | 0.08  |
| 881 | CCIN     | 0.00  | 0.00  | 0.00  | 0.04  |
| 883 | CCBL1    | 0.02  | 0.00  | 0.00  | 0.11  |
| 885 | CCK      | -0.04 | 0.00  | 0.00  | 0.02  |
| 886 | CCKAR    | -0.05 | -0.09 | -0.05 | -0.10 |
| 887 | CCKBR    | -0.02 | 0.00  | -0.03 | 0.09  |
| 890 | CCNA2    | 0.00  | 0.00  | -0.03 | 0.01  |
| 891 | CCNB1    | 0.00  | 0.00  | -0.08 | 0.01  |
| 894 | CCND2    | -0.02 | 0.09  | 0.08  | 0.11  |
| 896 | CCND3    | 0.00  | 0.00  | 0.08  | -0.04 |
| 898 | CCNE1    | 0.00  | 0.09  | 0.05  | -0.01 |
| 899 | CCNF     | 0.04  | 0.09  | 0.00  | 0.18  |
| 900 | CCNG1    | 0.00  | 0.00  | -0.03 | 0.22  |
| 901 | CCNG2    | -0.02 | 0.00  | -0.03 | 0.03  |
| 902 | CCNH     | 0.00  | 0.00  | -0.14 | 0.25  |
| 904 | CCNT1    | 0.00  | 0.00  | 0.00  | NaN   |
| 905 | CCNT2    | -0.02 | 0.00  | 0.00  | 0.07  |
| 908 | CCT6A    | 0.00  | 0.00  | 0.05  | 0.40  |
| 909 | CD1A     | 0.02  | 0.00  | 0.16  | 0.02  |
| 910 | CD1B     | 0.02  | 0.00  | 0.16  | -0.06 |
| 911 | CD1C     | 0.02  | 0.00  | 0.16  | -0.19 |
| 912 | CD1D     | 0.02  | 0.00  | 0.16  | -0.19 |
| 913 | CD1E     | 0.02  | 0.00  | 0.16  | -0.02 |
| 914 | CD2      | 0.02  | 0.00  | -0.03 | -0.25 |
| 915 | CD3D     | -0.05 | 0.00  | 0.00  | 0.21  |
| 916 | CD3E     | -0.05 | 0.00  | 0.00  | 0.27  |
| 917 | CD3G     | -0.05 | 0.00  | 0.00  | 0.15  |
| 921 | CD5      | -0.02 | 0.00  | 0.05  | 0.09  |
| 922 | CD5L     | 0.00  | 0.00  | 0.14  | 0.11  |
| 923 | CD6      | -0.02 | 0.00  | 0.05  | 0.24  |
| 924 | CD7      | -0.04 | 0.09  | 0.08  | -0.10 |
| 925 | CD8A     | 0.00  | 0.00  | 0.00  | NaN   |
| 928 | CD9      | -0.02 | 0.09  | 0.05  | 0.29  |
| 929 | CD14     | 0.00  | 0.00  | 0.00  | NaN   |
| 930 | CD19     | 0.05  | 0.00  | 0.00  | -0.24 |

|      |         |       |       |       |       |
|------|---------|-------|-------|-------|-------|
| 931  | MS4A2   | -0.04 | 0.00  | 0.00  | 0.18  |
| 933  | CD22    | 0.02  | 0.00  | 0.05  | 0.20  |
| 934  | CD24    | 0.02  | 0.00  | 0.00  | 0.17  |
| 940  | CD28    | 0.02  | 0.00  | 0.00  | 0.05  |
| 941  | CD80    | 0.00  | 0.00  | -0.03 | -0.33 |
| 942  | CD86    | 0.00  | 0.00  | -0.03 | -0.11 |
| 943  | TNFRSF8 | -0.02 | 0.00  | 0.00  | 0.05  |
| 944  | TNFSF8  | -0.02 | 0.00  | 0.00  | 0.13  |
| 945  | CD33    | 0.00  | 0.00  | -0.03 | -0.10 |
| 946  | SIGLEC6 | 0.00  | 0.00  | -0.03 | -0.31 |
| 948  | CD36    | 0.02  | 0.00  | 0.03  | -0.01 |
| 951  | CD37    | 0.02  | 0.00  | -0.03 | 0.13  |
| 952  | CD38    | -0.04 | -0.09 | -0.05 | -0.06 |
| 953  | ENTPD1  | -0.02 | 0.00  | -0.05 | 0.17  |
| 955  | ENTPD6  | 0.02  | 0.00  | -0.03 | 0.11  |
| 956  | ENTPD3  | -0.04 | 0.00  | 0.00  | -0.02 |
| 957  | ENTPD5  | -0.02 | 0.00  | 0.00  | 0.16  |
| 960  | CD44    | 0.04  | 0.00  | -0.03 | 0.30  |
| 961  | CD47    | 0.00  | 0.00  | -0.03 | 0.21  |
| 962  | CD48    | 0.07  | 0.00  | 0.14  | -0.18 |
| 963  | CD53    | 0.00  | 0.00  | -0.05 | -0.16 |
| 965  | CD58    | 0.02  | 0.00  | -0.03 | 0.09  |
| 966  | CD59    | 0.04  | 0.00  | -0.05 | 0.25  |
| 967  | CD63    | 0.02  | 0.00  | 0.00  | 0.14  |
| 968  | CD68    | -0.05 | 0.00  | 0.00  | 0.09  |
| 969  | CD69    | 0.00  | -0.18 | 0.05  | 0.04  |
| 972  | CD74    | 0.00  | 0.00  | 0.00  | NaN   |
| 973  | CD79A   | 0.02  | 0.00  | -0.03 | -0.19 |
| 974  | CD79B   | 0.16  | 0.18  | 0.03  | -0.06 |
| 975  | CD81    | 0.00  | 0.00  | 0.00  | NaN   |
| 976  | CD97    | 0.02  | -0.09 | 0.00  | 0.19  |
| 977  | CD151   | 0.00  | 0.00  | 0.00  | NaN   |
| 978  | CDA     | 0.00  | 0.00  | 0.00  | NaN   |
| 983  | CDC2    | 0.00  | 0.00  | -0.05 | 0.05  |
| 984  | CDC2L1  | -0.02 | 0.00  | 0.03  | 0.24  |
| 987  | LRBA    | -0.02 | 0.00  | 0.00  | 0.17  |
| 988  | CDC5L   | 0.00  | 0.00  | 0.08  | 0.33  |
| 990  | CDC6    | 0.04  | 0.36  | 0.03  | 0.48  |
| 991  | CDC20   | 0.02  | 0.00  | 0.00  | 0.14  |
| 993  | CDC25A  | -0.04 | 0.00  | 0.00  | 0.19  |
| 994  | CDC25B  | 0.02  | 0.00  | -0.03 | -0.07 |
| 995  | CDC25C  | 0.00  | 0.00  | -0.03 | -0.02 |
| 996  | CDC27   | -0.04 | 0.00  | 0.00  | 0.33  |
| 997  | CDC34   | 0.00  | 0.00  | -0.03 | -0.02 |
| 998  | CDC42   | 0.00  | 0.00  | 0.00  | NaN   |
| 999  | CDH1    | -0.09 | 0.00  | 0.00  | -0.03 |
| 1000 | CDH2    | 0.02  | -0.09 | 0.00  | -0.04 |

|      |         |       |       |       |       |
|------|---------|-------|-------|-------|-------|
| 1001 | CDH3    | -0.09 | 0.00  | 0.00  | 0.03  |
| 1002 | CDH4    | 0.04  | 0.09  | 0.03  | 0.25  |
| 1003 | CDH5    | -0.09 | 0.00  | 0.00  | 0.04  |
| 1004 | CDH6    | 0.02  | 0.18  | 0.00  | 0.16  |
| 1005 | CDH7    | -0.02 | -0.09 | 0.00  | -0.16 |
| 1006 | CDH8    | -0.11 | 0.00  | 0.00  | -0.01 |
| 1007 | CDH9    | 0.02  | 0.18  | 0.00  | -0.01 |
| 1008 | CDH10   | 0.02  | 0.18  | 0.00  | -0.10 |
| 1009 | CDH11   | -0.11 | 0.00  | 0.00  | 0.09  |
| 1010 | CDH12   | 0.02  | 0.18  | 0.00  | -0.05 |
| 1012 | CDH13   | -0.09 | 0.00  | 0.00  | 0.02  |
| 1013 | CDH15   | -0.04 | 0.00  | 0.03  | 0.11  |
| 1014 | CDH16   | -0.05 | 0.00  | 0.00  | -0.04 |
| 1015 | CDH17   | 0.16  | 0.09  | 0.22  | 0.10  |
| 1016 | CDH18   | 0.02  | 0.18  | 0.00  | -0.26 |
| 1017 | CDK2    | 0.04  | 0.00  | 0.00  | 0.26  |
| 1018 | CDK3    | 0.04  | 0.27  | 0.03  | 0.22  |
| 1019 | CDK4    | 0.02  | 0.09  | 0.00  | 0.21  |
| 1020 | CDK5    | 0.04  | 0.00  | 0.08  | -0.07 |
| 1021 | CDK6    | 0.02  | 0.00  | 0.08  | 0.48  |
| 1022 | CDK7    | 0.00  | 0.00  | -0.08 | 0.06  |
| 1024 | CDK8    | -0.05 | 0.00  | -0.05 | 0.15  |
| 1025 | CDK9    | 0.00  | 0.00  | 0.00  | 0.11  |
| 1026 | CDKN1A  | 0.02  | 0.00  | 0.05  | 0.11  |
| 1027 | CDKN1B  | 0.00  | -0.09 | 0.05  | 0.08  |
| 1028 | CDKN1C  | 0.00  | 0.00  | 0.00  | NaN   |
| 1029 | CDKN2A  | -0.13 | -0.09 | -0.05 | 0.19  |
| 1030 | CDKN2B  | -0.13 | -0.09 | -0.05 | 0.04  |
| 1031 | CDKN2C  | 0.00  | 0.00  | -0.03 | 0.22  |
| 1032 | CDKN2D  | 0.02  | 0.00  | 0.00  | 0.18  |
| 1033 | CDKN3   | 0.00  | 0.00  | 0.00  | 0.13  |
| 1036 | CDO1    | 0.00  | 0.00  | -0.05 | -0.02 |
| 1038 | CDR1    | -0.05 | 0.09  | -0.08 | -0.16 |
| 1039 | CDR2    | 0.02  | -0.09 | 0.00  | 0.14  |
| 1040 | CDS1    | -0.04 | 0.00  | -0.03 | -0.02 |
| 1044 | CDX1    | 0.00  | 0.00  | 0.00  | NaN   |
| 1045 | CDX2    | -0.05 | 0.00  | -0.05 | -0.16 |
| 1046 | CDX4    | -0.04 | 0.00  | -0.08 | 0.01  |
| 1047 | CLGN    | -0.02 | 0.00  | 0.00  | -0.08 |
| 1048 | CEACAM5 | 0.02  | 0.00  | -0.03 | 0.08  |
| 1050 | CEBPA   | 0.00  | 0.00  | 0.05  | 0.07  |
| 1051 | CEBPB   | 0.05  | 0.00  | 0.05  | 0.16  |
| 1053 | CEBPE   | -0.02 | 0.00  | 0.00  | 0.20  |
| 1054 | CEBPG   | 0.00  | 0.00  | 0.05  | 0.05  |
| 1056 | CEL     | 0.02  | 0.00  | 0.00  | 0.00  |
| 1058 | CENPA   | -0.02 | 0.00  | 0.00  | 0.17  |
| 1060 | CENPC1  | -0.02 | 0.00  | 0.00  | 0.07  |

|      |         |       |       |       |       |
|------|---------|-------|-------|-------|-------|
| 1062 | CENPE   | -0.04 | 0.00  | 0.00  | 0.04  |
| 1063 | CENPF   | 0.07  | 0.00  | 0.00  | 0.04  |
| 1068 | CETN1   | 0.02  | -0.09 | 0.00  | 0.07  |
| 1069 | CETN2   | -0.02 | 0.00  | -0.11 | 0.29  |
| 1070 | CETN3   | 0.00  | 0.00  | -0.14 | 0.12  |
| 1071 | CETP    | -0.05 | 0.00  | 0.00  | 0.07  |
| 1072 | CFL1    | 0.02  | 0.00  | 0.05  | -0.04 |
| 1075 | CTSC    | -0.05 | 0.00  | 0.00  | 0.14  |
| 1080 | CFTR    | 0.00  | 0.00  | -0.03 | 0.07  |
| 1081 | CGA     | -0.02 | 0.00  | -0.05 | -0.12 |
| 1084 | CEACAM3 | 0.02  | 0.00  | -0.03 | -0.16 |
| 1087 | CEACAM7 | 0.02  | 0.00  | -0.03 | 0.06  |
| 1088 | CEACAM8 | 0.00  | 0.00  | -0.03 | 0.00  |
| 1089 | CEACAM4 | 0.02  | 0.00  | -0.03 | -0.22 |
| 1103 | CHAT    | -0.02 | 0.00  | -0.03 | 0.01  |
| 1105 | CHD1    | 0.00  | 0.00  | -0.14 | 0.20  |
| 1106 | CHD2    | 0.02  | 0.00  | -0.03 | -0.10 |
| 1107 | CHD3    | -0.05 | 0.00  | 0.00  | 0.10  |
| 1108 | CHD4    | -0.02 | 0.09  | 0.05  | 0.26  |
| 1109 | AKR1C4  | 0.00  | 0.00  | 0.08  | 0.01  |
| 1111 | CHEK1   | -0.05 | 0.00  | -0.03 | 0.08  |
| 1112 | CHES1   | -0.02 | 0.00  | 0.03  | 0.14  |
| 1113 | CHGA    | -0.02 | 0.00  | 0.03  | -0.01 |
| 1114 | CHGB    | 0.00  | 0.00  | -0.05 | -0.11 |
| 1116 | CHI3L1  | 0.09  | 0.00  | 0.05  | 0.17  |
| 1117 | CHI3L2  | 0.00  | 0.00  | -0.03 | -0.13 |
| 1118 | CHIT1   | 0.09  | 0.00  | 0.05  | -0.06 |
| 1121 | CHM     | -0.07 | 0.00  | -0.08 | 0.02  |
| 1123 | CHN1    | 0.00  | 0.00  | 0.00  | -0.09 |
| 1124 | CHN2    | -0.02 | 0.18  | 0.00  | 0.09  |
| 1129 | CHRM2   | 0.02  | 0.00  | 0.03  | 0.05  |
| 1132 | CHRM4   | -0.02 | 0.00  | -0.03 | 0.27  |
| 1134 | CHRNA1  | 0.00  | 0.00  | 0.00  | 0.17  |
| 1135 | CHRNA2  | -0.09 | -0.18 | -0.19 | 0.04  |
| 1136 | CHRNA3  | 0.00  | 0.00  | -0.03 | 0.18  |
| 1137 | CHRNA4  | 0.04  | 0.09  | 0.08  | 0.03  |
| 1138 | CHRNA5  | 0.00  | 0.00  | -0.03 | -0.04 |
| 1139 | CHRNA7  | 0.00  | 0.00  | -0.16 | -0.08 |
| 1140 | CHRNB1  | -0.05 | 0.00  | 0.00  | -0.04 |
| 1141 | CHRNB2  | 0.11  | 0.00  | 0.14  | -0.01 |
| 1142 | CHRNB3  | 0.02  | 0.09  | 0.11  | 0.07  |
| 1143 | CHRNB4  | 0.00  | 0.00  | -0.03 | -0.09 |
| 1144 | CHRND   | 0.02  | 0.00  | 0.00  | 0.12  |
| 1145 | CHRNE   | -0.04 | 0.00  | 0.00  | 0.24  |
| 1146 | CHRNG   | 0.02  | 0.00  | 0.00  | 0.11  |
| 1147 | CHUK    | -0.02 | 0.00  | -0.03 | 0.10  |
| 1149 | CIDEA   | -0.02 | -0.09 | 0.00  | 0.07  |

|      |        |       |       |       |       |
|------|--------|-------|-------|-------|-------|
| 1152 | CKB    | 0.00  | 0.00  | 0.03  | -0.03 |
| 1153 | CIRBP  | 0.00  | 0.00  | -0.03 | 0.07  |
| 1154 | CISH   | 0.00  | 0.00  | 0.00  | NaN   |
| 1158 | CKM    | -0.02 | 0.00  | -0.03 | 0.02  |
| 1160 | CKMT2  | 0.00  | 0.09  | -0.14 | -0.08 |
| 1164 | CKS2   | -0.02 | 0.00  | 0.00  | 0.09  |
| 1173 | AP2M1  | 0.05  | 0.00  | 0.05  | 0.21  |
| 1174 | AP1S1  | 0.02  | 0.00  | 0.00  | 0.18  |
| 1175 | AP2S1  | -0.04 | 0.00  | -0.03 | 0.45  |
| 1176 | AP3S1  | 0.00  | 0.00  | -0.05 | 0.12  |
| 1178 | CLC    | 0.02  | 0.09  | 0.08  | 0.01  |
| 1179 | CLCA1  | -0.02 | 0.00  | -0.03 | -0.12 |
| 1180 | CLCN1  | 0.02  | 0.00  | 0.00  | -0.04 |
| 1181 | CLCN2  | 0.05  | 0.00  | 0.05  | 0.18  |
| 1182 | CLCN3  | -0.02 | 0.00  | -0.05 | 0.10  |
| 1183 | CLCN4  | -0.05 | -0.09 | -0.14 | 0.01  |
| 1184 | CLCN5  | -0.04 | 0.00  | -0.08 | -0.15 |
| 1185 | CLCN6  | -0.02 | 0.00  | 0.00  | -0.06 |
| 1186 | CLCN7  | 0.04  | 0.18  | 0.08  | 0.20  |
| 1187 | CLCNKA | 0.02  | 0.18  | 0.00  | 0.17  |
| 1188 | CLCNKB | 0.02  | 0.18  | 0.00  | 0.02  |
| 1191 | CLU    | -0.09 | -0.18 | -0.19 | 0.30  |
| 1192 | CLIC1  | 0.00  | 0.00  | 0.05  | 0.12  |
| 1193 | CLIC2  | -0.05 | 0.00  | -0.11 | 0.23  |
| 1196 | CLK2   | 0.09  | 0.00  | 0.14  | 0.41  |
| 1198 | CLK3   | 0.00  | 0.00  | 0.00  | NaN   |
| 1203 | CLN5   | -0.05 | -0.09 | -0.14 | 0.23  |
| 1207 | CLNS1A | 0.07  | 0.09  | 0.03  | 0.53  |
| 1209 | CLPTM1 | -0.04 | 0.00  | -0.03 | 0.14  |
| 1211 | CLTA   | 0.00  | 0.00  | 0.00  | -0.14 |
| 1212 | CLTB   | 0.00  | 0.00  | -0.03 | 0.12  |
| 1213 | CLTC   | 0.20  | 0.18  | 0.03  | 0.72  |
| 1215 | CMA1   | -0.02 | 0.00  | 0.00  | -0.03 |
| 1230 | CCR1   | -0.04 | 0.00  | 0.00  | 0.25  |
| 1232 | CCR3   | -0.04 | 0.00  | 0.00  | 0.08  |
| 1233 | CCR4   | 0.02  | 0.00  | -0.03 | -0.07 |
| 1234 | CCR5   | -0.04 | 0.00  | 0.00  | 0.18  |
| 1235 | CCR6   | -0.02 | 0.00  | -0.03 | 0.15  |
| 1236 | CCR7   | 0.02  | 0.09  | 0.00  | 0.24  |
| 1237 | CCR8   | -0.04 | 0.00  | 0.00  | 0.06  |
| 1238 | CCBP2  | -0.04 | 0.00  | 0.00  | 0.09  |
| 1240 | CMKLR1 | 0.00  | 0.00  | 0.00  | NaN   |
| 1241 | LTB4R  | 0.00  | 0.00  | 0.00  | 0.08  |
| 1244 | ABCC2  | -0.02 | 0.00  | -0.03 | 0.12  |
| 1258 | CNGB1  | -0.05 | 0.00  | 0.03  | 0.14  |
| 1259 | CNGA1  | -0.04 | 0.00  | -0.03 | -0.03 |
| 1261 | CNGA3  | 0.00  | 0.00  | 0.00  | NaN   |



|      |         |       |      |       |       |
|------|---------|-------|------|-------|-------|
| 1264 | CNN1    | 0.00  | 0.00 | 0.00  | NaN   |
| 1265 | CNN2    | 0.00  | 0.00 | -0.03 | -0.03 |
| 1266 | CNN3    | -0.02 | 0.00 | 0.00  | 0.10  |
| 1267 | CNP     | -0.04 | 0.09 | 0.00  | 0.36  |
| 1268 | CNR1    | -0.02 | 0.00 | -0.05 | -0.10 |
| 1269 | CNR2    | 0.00  | 0.00 | 0.00  | NaN   |
| 1271 | CNTFR   | 0.00  | 0.00 | 0.00  | 0.35  |
| 1272 | CNTN1   | 0.00  | 0.09 | 0.03  | 0.00  |
| 1277 | COL1A1  | 0.13  | 0.18 | 0.03  | 0.16  |
| 1280 | COL2A1  | 0.00  | 0.00 | 0.00  | NaN   |
| 1281 | COL3A1  | 0.02  | 0.00 | 0.00  | 0.13  |
| 1282 | COL4A1  | 0.00  | 0.00 | -0.03 | -0.03 |
| 1284 | COL4A2  | 0.00  | 0.00 | -0.05 | 0.04  |
| 1285 | COL4A3  | 0.00  | 0.00 | 0.00  | NaN   |
| 1286 | COL4A4  | 0.00  | 0.00 | 0.00  | NaN   |
| 1287 | COL4A5  | -0.05 | 0.00 | -0.08 | 0.02  |
| 1288 | COL4A6  | -0.05 | 0.00 | -0.08 | -0.10 |
| 1289 | COL5A1  | 0.02  | 0.00 | 0.03  | 0.13  |
| 1290 | COL5A2  | 0.02  | 0.00 | 0.00  | 0.12  |
| 1291 | COL6A1  | 0.00  | 0.09 | 0.00  | 0.17  |
| 1292 | COL6A2  | 0.00  | 0.09 | 0.00  | 0.11  |
| 1293 | COL6A3  | 0.02  | 0.00 | 0.00  | 0.08  |
| 1294 | COL7A1  | -0.04 | 0.00 | 0.00  | -0.09 |
| 1295 | COL8A1  | 0.00  | 0.00 | 0.00  | 0.11  |
| 1297 | COL9A1  | -0.02 | 0.00 | 0.00  | 0.02  |
| 1298 | COL9A2  | -0.02 | 0.00 | 0.00  | 0.11  |
| 1299 | COL9A3  | 0.04  | 0.09 | 0.08  | 0.16  |
| 1301 | COL11A1 | -0.02 | 0.00 | -0.03 | 0.01  |
| 1305 | COL13A1 | -0.02 | 0.00 | 0.03  | 0.07  |
| 1306 | COL15A1 | -0.02 | 0.00 | 0.00  | 0.05  |
| 1307 | COL16A1 | 0.02  | 0.09 | 0.00  | 0.07  |
| 1308 | COL17A1 | -0.02 | 0.00 | 0.00  | -0.01 |
| 1310 | COL19A1 | -0.02 | 0.00 | 0.00  | 0.03  |
| 1311 | COMP    | 0.02  | 0.00 | 0.03  | 0.05  |
| 1312 | COMT    | -0.02 | 0.00 | 0.08  | 0.20  |
| 1314 | COPA    | 0.05  | 0.00 | 0.14  | 0.43  |
| 1317 | SLC31A1 | -0.02 | 0.00 | 0.00  | 0.10  |
| 1318 | SLC31A2 | -0.02 | 0.00 | 0.00  | 0.11  |
| 1326 | MAP3K8  | -0.02 | 0.00 | 0.03  | 0.09  |
| 1327 | COX4I1  | -0.09 | 0.00 | 0.00  | 0.31  |
| 1329 | COX5B   | 0.00  | 0.00 | 0.00  | NaN   |
| 1337 | COX6A1  | 0.02  | 0.00 | 0.00  | 0.13  |
| 1345 | COX6C   | 0.16  | 0.18 | 0.27  | 0.06  |
| 1346 | COX7A1  | -0.02 | 0.09 | 0.08  | -0.07 |
| 1347 | COX7A2  | -0.02 | 0.00 | -0.03 | 0.21  |
| 1349 | COX7B   | -0.04 | 0.00 | -0.08 | 0.33  |
| 1350 | COX7C   | 0.00  | 0.00 | -0.14 | 0.10  |

|      |        |       |       |       |       |
|------|--------|-------|-------|-------|-------|
| 1352 | COX10  | -0.05 | 0.00  | -0.03 | 0.23  |
| 1353 | COX11  | 0.07  | 0.27  | 0.03  | 0.49  |
| 1355 | COX15  | -0.02 | 0.00  | -0.03 | 0.36  |
| 1356 | CP     | 0.04  | 0.00  | 0.03  | 0.20  |
| 1357 | CPA1   | 0.02  | 0.00  | 0.00  | 0.08  |
| 1358 | CPA2   | 0.02  | 0.00  | 0.00  | 0.06  |
| 1359 | CPA3   | 0.02  | 0.00  | 0.03  | 0.14  |
| 1360 | CPB1   | 0.02  | 0.00  | 0.05  | 0.03  |
| 1361 | CPB2   | -0.07 | 0.00  | -0.11 | 0.18  |
| 1362 | CPD    | 0.02  | 0.09  | 0.00  | 0.29  |
| 1363 | CPE    | 0.00  | 0.00  | -0.05 | 0.02  |
| 1364 | CLDN4  | 0.02  | 0.00  | 0.05  | 0.03  |
| 1365 | CLDN3  | 0.02  | 0.09  | 0.05  | 0.12  |
| 1366 | CLDN7  | -0.05 | 0.00  | 0.00  | -0.05 |
| 1368 | CPM    | 0.04  | 0.09  | 0.03  | 0.12  |
| 1369 | CPN1   | -0.02 | 0.00  | -0.03 | 0.01  |
| 1371 | CPO    | 0.00  | 0.00  | 0.00  | NaN   |
| 1373 | CPS1   | 0.00  | 0.00  | 0.00  | NaN   |
| 1374 | CPT1A  | 0.09  | 0.09  | 0.03  | 0.21  |
| 1376 | CPT2   | 0.00  | 0.00  | -0.03 | 0.04  |
| 1378 | CR1    | 0.09  | 0.00  | 0.00  | -0.03 |
| 1380 | CR2    | 0.09  | 0.00  | 0.00  | -0.13 |
| 1381 | CRABP1 | 0.00  | 0.00  | -0.03 | 0.03  |
| 1382 | CRABP2 | 0.04  | 0.00  | 0.11  | 0.13  |
| 1384 | CRAT   | 0.02  | 0.00  | 0.00  | 0.09  |
| 1385 | CREB1  | 0.00  | 0.00  | 0.00  | NaN   |
| 1386 | ATF2   | -0.02 | 0.00  | 0.00  | -0.04 |
| 1387 | CREBBP | 0.04  | 0.00  | -0.03 | 0.22  |
| 1388 | CREBL1 | 0.00  | 0.00  | 0.05  | 0.17  |
| 1389 | CREBL2 | 0.00  | -0.09 | 0.05  | 0.13  |
| 1390 | CREM   | -0.02 | 0.00  | 0.00  | 0.22  |
| 1392 | CRH    | 0.11  | 0.00  | 0.16  | 0.19  |
| 1393 | CRHBP  | 0.00  | 0.00  | -0.14 | 0.00  |
| 1394 | CRHR1  | -0.05 | 0.00  | 0.00  | 0.22  |
| 1395 | CRHR2  | -0.02 | 0.09  | -0.03 | -0.05 |
| 1397 | CRIP2  | 0.00  | 0.00  | 0.08  | -0.20 |
| 1398 | CRK    | -0.04 | 0.00  | 0.00  | 0.00  |
| 1399 | CRKL   | -0.02 | 0.00  | 0.03  | 0.22  |
| 1400 | CRMP1  | -0.02 | 0.00  | 0.00  | -0.04 |
| 1401 | CRP    | 0.07  | 0.00  | 0.16  | -0.03 |
| 1406 | CRX    | -0.02 | 0.00  | 0.00  | -0.06 |
| 1407 | CRY1   | 0.00  | 0.00  | 0.00  | NaN   |
| 1408 | CRY2   | -0.02 | 0.00  | -0.03 | -0.01 |
| 1409 | CRYAA  | 0.00  | 0.00  | -0.03 | 0.03  |
| 1410 | CRYAB  | -0.07 | 0.00  | 0.00  | 0.16  |
| 1411 | CRYBA1 | 0.04  | 0.27  | 0.00  | -0.06 |
| 1412 | CRYBA2 | 0.00  | 0.00  | 0.00  | NaN   |

|      |          |       |       |       |       |
|------|----------|-------|-------|-------|-------|
| 1413 | CRYBA4   | -0.05 | -0.09 | 0.03  | 0.09  |
| 1414 | CRYBB1   | -0.05 | -0.09 | 0.03  | 0.04  |
| 1415 | CRYBB2   | 0.00  | 0.00  | 0.03  | 0.20  |
| 1417 | CRYBB3   | 0.00  | 0.00  | 0.03  | 0.02  |
| 1418 | CRYGA    | 0.00  | 0.00  | 0.00  | NaN   |
| 1419 | CRYGB    | 0.00  | 0.00  | 0.00  | NaN   |
| 1420 | CRYGC    | 0.00  | 0.00  | 0.00  | NaN   |
| 1421 | CRYGD    | 0.00  | 0.00  | 0.00  | NaN   |
| 1428 | CRYM     | 0.02  | 0.00  | 0.00  | -0.23 |
| 1429 | CRYZ     | -0.02 | 0.00  | -0.03 | 0.02  |
| 1431 | CS       | 0.00  | 0.00  | 0.00  | NaN   |
| 1432 | MAPK14   | 0.02  | 0.00  | 0.05  | 0.13  |
| 1434 | CSE1L    | 0.07  | 0.00  | 0.03  | 0.44  |
| 1435 | CSF1     | 0.00  | 0.00  | -0.03 | 0.12  |
| 1436 | CSF1R    | 0.00  | 0.00  | 0.00  | NaN   |
| 1437 | CSF2     | 0.00  | 0.00  | -0.03 | 0.15  |
| 1439 | CSF2RB   | -0.04 | 0.00  | 0.03  | 0.20  |
| 1440 | CSF3     | 0.04  | 0.55  | 0.05  | 0.02  |
| 1441 | CSF3R    | -0.02 | 0.00  | 0.00  | -0.05 |
| 1445 | CSK      | 0.00  | 0.00  | 0.00  | NaN   |
| 1447 | CSN2     | -0.02 | 0.00  | 0.00  | 0.08  |
| 1452 | CSNK1A1  | 0.00  | 0.00  | 0.00  | NaN   |
| 1453 | CSNK1D   | -0.02 | 0.09  | 0.08  | 0.07  |
| 1454 | CSNK1E   | -0.04 | 0.00  | -0.03 | 0.25  |
| 1455 | CSNK1G2  | -0.02 | 0.09  | -0.03 | 0.23  |
| 1456 | CSNK1G3  | 0.00  | 0.00  | -0.03 | 0.07  |
| 1457 | CSNK2A1  | 0.02  | 0.00  | -0.03 | 0.23  |
| 1459 | CSNK2A2  | -0.07 | 0.00  | 0.00  | 0.24  |
| 1460 | CSNK2B   | 0.00  | 0.00  | 0.05  | 0.14  |
| 1462 | CSPG2    | 0.00  | 0.09  | -0.14 | 0.00  |
| 1463 | CSPG3    | 0.02  | 0.00  | 0.00  | 0.00  |
| 1464 | CSPG4    | 0.00  | 0.00  | 0.00  | NaN   |
| 1465 | CSRP1    | 0.07  | 0.00  | 0.05  | 0.31  |
| 1466 | CSRP2    | -0.02 | 0.00  | 0.00  | 0.19  |
| 1468 | SLC25A10 | 0.00  | 0.09  | 0.08  | 0.06  |
| 1471 | CST3     | 0.02  | 0.00  | -0.03 | 0.03  |
| 1472 | CST4     | 0.02  | 0.00  | -0.03 | 0.13  |
| 1473 | CST5     | 0.02  | 0.00  | -0.03 | 0.00  |
| 1474 | CST6     | 0.02  | 0.00  | 0.03  | -0.01 |
| 1475 | CSTA     | 0.00  | 0.00  | -0.03 | 0.33  |
| 1476 | CSTB     | 0.00  | 0.00  | 0.00  | 0.26  |
| 1477 | CSTF1    | 0.02  | 0.00  | 0.05  | 0.29  |
| 1478 | CSTF2    | -0.05 | 0.00  | -0.08 | -0.19 |
| 1479 | CSTF3    | 0.04  | 0.00  | -0.03 | 0.06  |
| 1486 | CTBS     | -0.02 | 0.00  | -0.03 | 0.05  |
| 1487 | CTBP1    | 0.02  | 0.00  | 0.00  | 0.06  |
| 1488 | CTBP2    | -0.04 | 0.00  | 0.03  | 0.12  |

|      |         |       |       |       |       |
|------|---------|-------|-------|-------|-------|
| 1489 | CTF1    | 0.07  | 0.09  | 0.00  | 0.05  |
| 1490 | CTGF    | -0.02 | 0.00  | 0.08  | -0.07 |
| 1491 | CTH     | -0.02 | 0.00  | -0.03 | -0.03 |
| 1493 | CTLA4   | 0.00  | 0.00  | 0.00  | NaN   |
| 1495 | CTNNA1  | 0.00  | 0.00  | -0.03 | 0.10  |
| 1496 | CTNNA2  | 0.00  | 0.00  | 0.00  | NaN   |
| 1497 | CTNS    | -0.04 | 0.00  | 0.00  | 0.16  |
| 1499 | CTNNB1  | -0.04 | 0.00  | 0.00  | 0.12  |
| 1500 | CTNND1  | 0.02  | 0.00  | 0.05  | 0.32  |
| 1501 | CTNND2  | 0.02  | 0.18  | 0.00  | 0.06  |
| 1503 | CTPS    | 0.00  | 0.00  | 0.00  | NaN   |
| 1504 | CTRB1   | -0.09 | 0.00  | 0.03  | 0.10  |
| 1506 | CTRL    | -0.04 | 0.00  | 0.00  | 0.11  |
| 1508 | CTSB    | -0.15 | -0.18 | -0.22 | 0.32  |
| 1511 | CTSG    | -0.02 | 0.00  | 0.00  | 0.10  |
| 1512 | CTSH    | 0.00  | 0.00  | -0.03 | -0.09 |
| 1513 | CTSK    | 0.09  | 0.09  | 0.16  | -0.08 |
| 1514 | CTSL    | -0.02 | 0.00  | 0.00  | 0.01  |
| 1515 | CTSL2   | -0.02 | 0.00  | 0.00  | -0.03 |
| 1519 | CTSO    | -0.02 | 0.00  | -0.03 | 0.13  |
| 1520 | CTSS    | 0.09  | 0.09  | 0.16  | -0.07 |
| 1521 | CTSW    | 0.02  | 0.00  | 0.03  | -0.11 |
| 1522 | CTSZ    | 0.05  | 0.09  | 0.03  | 0.15  |
| 1523 | CUTL1   | 0.02  | 0.00  | 0.00  | 0.14  |
| 1524 | CX3CR1  | -0.04 | 0.00  | 0.00  | 0.14  |
| 1525 | CXADR   | -0.04 | -0.18 | 0.05  | 0.10  |
| 1527 | CXorf2  | 0.02  | 0.00  | -0.03 | 0.02  |
| 1534 | CYB561  | 0.16  | 0.09  | 0.03  | 0.66  |
| 1535 | CYBA    | -0.04 | 0.00  | 0.03  | 0.12  |
| 1536 | CYBB    | -0.05 | 0.00  | -0.11 | 0.12  |
| 1537 | CYC1    | 0.16  | 0.00  | 0.35  | 0.28  |
| 1539 | CYLC2   | -0.02 | 0.00  | 0.00  | -0.04 |
| 1540 | CYLD    | -0.05 | 0.00  | -0.03 | 0.20  |
| 1543 | CYP1A1  | 0.00  | 0.00  | 0.00  | NaN   |
| 1544 | CYP1A2  | 0.00  | 0.00  | 0.00  | NaN   |
| 1545 | CYP1B1  | 0.00  | 0.00  | 0.00  | NaN   |
| 1548 | CYP2A6  | 0.00  | 0.00  | 0.00  | -0.11 |
| 1551 | CYP3A7  | 0.02  | 0.00  | 0.00  | 0.12  |
| 1553 | CYP2A13 | 0.00  | 0.00  | 0.00  | -0.12 |
| 1555 | CYP2B6  | 0.00  | 0.00  | 0.00  | -0.06 |
| 1558 | CYP2C8  | -0.02 | 0.00  | -0.05 | 0.17  |
| 1559 | CYP2C9  | -0.02 | 0.00  | -0.05 | 0.09  |
| 1562 | CYP2C18 | -0.02 | 0.00  | -0.05 | 0.19  |
| 1572 | CYP2F1  | 0.00  | 0.00  | 0.00  | -0.10 |
| 1573 | CYP2J2  | 0.00  | 0.00  | 0.00  | 0.04  |
| 1576 | CYP3A4  | 0.02  | 0.00  | 0.00  | 0.13  |
| 1577 | CYP3A5  | 0.02  | 0.00  | 0.00  | -0.10 |

|      |         |       |       |       |       |
|------|---------|-------|-------|-------|-------|
| 1579 | CYP4A11 | 0.00  | 0.00  | 0.00  | 0.11  |
| 1580 | CYP4B1  | 0.00  | 0.00  | 0.00  | -0.02 |
| 1581 | CYP7A1  | 0.15  | 0.00  | 0.08  | 0.10  |
| 1584 | CYP11B1 | 0.16  | 0.09  | 0.38  | -0.05 |
| 1585 | CYP11B2 | 0.16  | 0.00  | 0.35  | -0.08 |
| 1592 | CYP26A1 | -0.02 | 0.00  | -0.05 | -0.09 |
| 1593 | CYP27A1 | 0.00  | 0.00  | 0.00  | NaN   |
| 1594 | CYP27B1 | 0.02  | 0.09  | 0.00  | 0.17  |
| 1600 | DAB1    | 0.00  | 0.00  | 0.00  | 0.06  |
| 1601 | DAB2    | 0.04  | 0.09  | 0.00  | 0.13  |
| 1603 | DAD1    | -0.02 | 0.00  | 0.00  | 0.00  |
| 1605 | DAG1    | 0.00  | 0.00  | 0.00  | NaN   |
| 1606 | DGKA    | 0.04  | 0.00  | 0.00  | 0.10  |
| 1607 | DGKB    | -0.02 | 0.00  | 0.00  | -0.02 |
| 1608 | DGKG    | 0.04  | 0.00  | 0.03  | 0.07  |
| 1609 | DGKQ    | 0.02  | 0.00  | 0.05  | -0.09 |
| 1610 | DAO     | 0.00  | 0.00  | 0.00  | NaN   |
| 1611 | DAP     | 0.02  | 0.18  | 0.00  | 0.28  |
| 1612 | DAPK1   | -0.02 | 0.00  | 0.00  | 0.15  |
| 1613 | DAPK3   | 0.00  | 0.00  | 0.00  | NaN   |
| 1615 | DARS    | 0.00  | 0.00  | 0.00  | 0.26  |
| 1616 | DAXX    | 0.00  | 0.00  | 0.05  | 0.12  |
| 1618 | DAZL    | -0.02 | 0.00  | -0.03 | 0.05  |
| 1621 | DBH     | 0.02  | 0.00  | 0.00  | -0.09 |
| 1622 | DBI     | 0.00  | 0.00  | 0.00  | NaN   |
| 1627 | DBN1    | 0.00  | 0.00  | 0.00  | NaN   |
| 1628 | DBP     | 0.00  | 0.00  | -0.03 | -0.14 |
| 1629 | DBT     | -0.02 | 0.00  | -0.03 | 0.16  |
| 1630 | DCC     | -0.02 | -0.18 | -0.05 | 0.13  |
| 1633 | DCK     | -0.02 | 0.00  | 0.00  | 0.11  |
| 1634 | DCN     | 0.00  | 0.09  | 0.00  | 0.05  |
| 1635 | DCTD    | -0.02 | 0.00  | -0.05 | 0.19  |
| 1636 | ACE     | 0.16  | 0.09  | 0.03  | 0.18  |
| 1638 | DCT     | -0.02 | 0.00  | -0.05 | 0.11  |
| 1639 | DCTN1   | 0.00  | 0.00  | 0.00  | NaN   |
| 1641 | DCX     | -0.05 | 0.00  | -0.08 | 0.09  |
| 1642 | DDB1    | -0.02 | 0.09  | 0.05  | 0.29  |
| 1643 | DDB2    | -0.02 | 0.00  | -0.03 | 0.35  |
| 1644 | DDC     | -0.05 | 0.00  | 0.05  | 0.19  |
| 1645 | AKR1C1  | 0.02  | 0.00  | 0.08  | 0.18  |
| 1646 | AKR1C2  | 0.00  | 0.00  | 0.08  | 0.20  |
| 1647 | GADD45A | -0.02 | 0.00  | 0.00  | 0.00  |
| 1649 | DDIT3   | 0.02  | 0.00  | 0.00  | 0.20  |
| 1650 | DDOST   | 0.00  | 0.00  | 0.00  | NaN   |
| 1652 | DDT     | 0.00  | 0.00  | 0.05  | -0.03 |
| 1653 | DDX1    | -0.02 | 0.00  | 0.00  | 0.03  |
| 1655 | DDX5    | 0.16  | 0.18  | 0.03  | 0.42  |

|      |        |       |       |       |       |
|------|--------|-------|-------|-------|-------|
| 1656 | DDX6   | -0.05 | 0.00  | 0.00  | -0.01 |
| 1657 | DMXL1  | 0.00  | 0.00  | 0.00  | NaN   |
| 1662 | DDX10  | -0.07 | -0.09 | 0.00  | 0.21  |
| 1663 | DDX11  | 0.02  | -0.09 | 0.08  | 0.15  |
| 1666 | DECR1  | 0.15  | 0.00  | 0.19  | 0.01  |
| 1669 | DEFA4  | -0.18 | -0.18 | -0.19 | 0.07  |
| 1670 | DEFA5  | -0.18 | -0.18 | -0.19 | 0.01  |
| 1671 | DEFA6  | -0.18 | -0.18 | -0.19 | 0.11  |
| 1672 | DEFB1  | -0.18 | -0.18 | -0.19 | 0.12  |
| 1674 | DES    | 0.00  | 0.00  | 0.00  | NaN   |
| 1676 | DFFA   | 0.00  | 0.00  | 0.00  | NaN   |
| 1677 | DFFB   | -0.02 | 0.00  | 0.00  | -0.11 |
| 1678 | TIMM8A | -0.05 | 0.00  | -0.08 | -0.15 |
| 1687 | DFNA5  | 0.00  | 0.18  | 0.03  | -0.04 |
| 1690 | COCH   | -0.02 | 0.00  | 0.00  | 0.12  |
| 1716 | DGUOK  | 0.00  | 0.00  | 0.00  | NaN   |
| 1717 | DHCR7  | 0.07  | 0.09  | 0.03  | 0.27  |
| 1718 | DHCR24 | 0.00  | 0.00  | 0.00  | 0.16  |
| 1719 | DHFR   | 0.00  | 0.00  | -0.14 | 0.20  |
| 1723 | DHODH  | -0.07 | 0.00  | 0.00  | 0.09  |
| 1725 | DHPS   | 0.02  | -0.09 | 0.00  | 0.15  |
| 1728 | NQO1   | -0.09 | 0.00  | 0.03  | 0.01  |
| 1729 | DIAPH1 | 0.00  | 0.00  | 0.00  | NaN   |
| 1730 | DIAPH2 | -0.05 | 0.00  | -0.08 | 0.10  |
| 1733 | DIO1   | 0.00  | 0.00  | 0.00  | 0.04  |
| 1734 | DIO2   | -0.02 | 0.00  | 0.00  | 0.12  |
| 1735 | DIO3   | 0.00  | 0.00  | 0.00  | NaN   |
| 1736 | DKC1   | -0.04 | 0.00  | -0.11 | 0.21  |
| 1737 | DLAT   | -0.07 | 0.00  | 0.00  | 0.07  |
| 1738 | DLD    | 0.02  | 0.00  | -0.03 | 0.08  |
| 1739 | DLG1   | 0.02  | 0.09  | -0.03 | 0.37  |
| 1740 | DLG2   | -0.02 | 0.00  | 0.00  | -0.01 |
| 1741 | DLG3   | -0.04 | 0.00  | -0.08 | -0.13 |
| 1742 | DLG4   | -0.05 | 0.00  | 0.00  | 0.02  |
| 1743 | DLST   | -0.02 | 0.00  | 0.00  | 0.16  |
| 1746 | DLX2   | -0.02 | 0.00  | 0.00  | 0.03  |
| 1748 | DLX4   | 0.13  | 0.18  | 0.03  | 0.21  |
| 1749 | DLX5   | 0.02  | 0.00  | -0.03 | 0.01  |
| 1750 | DLX6   | 0.02  | 0.00  | -0.03 | 0.03  |
| 1755 | DMBT1  | -0.04 | 0.00  | -0.03 | 0.04  |
| 1756 | DMD    | -0.07 | 0.00  | -0.11 | 0.16  |
| 1757 | SARDH  | 0.02  | 0.00  | 0.00  | 0.08  |
| 1758 | DMP1   | -0.04 | 0.00  | -0.03 | -0.10 |
| 1759 | DNM1   | 0.02  | 0.00  | 0.00  | 0.11  |
| 1760 | DMPK   | -0.02 | 0.00  | 0.00  | 0.10  |
| 1761 | DMRT1  | -0.04 | 0.00  | -0.11 | 0.03  |
| 1762 | DMWD   | -0.02 | 0.00  | 0.00  | 0.13  |

|      |          |       |       |       |       |
|------|----------|-------|-------|-------|-------|
| 1770 | DNAH9    | -0.09 | 0.00  | -0.03 | -0.01 |
| 1773 | DNASE1   | 0.04  | 0.00  | 0.00  | 0.04  |
| 1774 | DNASE1L1 | 0.00  | 0.00  | -0.03 | 0.16  |
| 1776 | DNASE1L3 | -0.04 | 0.00  | 0.00  | 0.08  |
| 1777 | DNASE2   | 0.02  | -0.09 | 0.00  | 0.13  |
| 1785 | DNM2     | 0.02  | 0.00  | 0.00  | 0.16  |
| 1786 | DNMT1    | 0.00  | 0.00  | 0.00  | NaN   |
| 1788 | DNMT3A   | -0.02 | 0.00  | 0.00  | 0.13  |
| 1789 | DNMT3B   | 0.00  | 0.00  | 0.00  | NaN   |
| 1791 | DNTT     | -0.02 | 0.00  | -0.05 | 0.11  |
| 1793 | DOCK1    | -0.04 | 0.00  | 0.00  | -0.02 |
| 1794 | DOCK2    | 0.00  | 0.00  | -0.03 | 0.04  |
| 1795 | DOCK3    | 0.00  | 0.00  | 0.00  | NaN   |
| 1796 | DOK1     | 0.00  | 0.00  | 0.00  | NaN   |
| 1797 | DOM3Z    | 0.00  | 0.00  | 0.05  | 0.19  |
| 1798 | DPAGT1   | -0.05 | 0.00  | 0.00  | 0.09  |
| 1800 | DPEP1    | -0.04 | 0.00  | 0.03  | 0.03  |
| 1803 | DPP4     | -0.02 | 0.00  | 0.03  | 0.04  |
| 1804 | DPP6     | 0.02  | 0.00  | -0.03 | 0.01  |
| 1805 | DPT      | 0.02  | 0.00  | 0.05  | 0.02  |
| 1806 | DPYD     | -0.02 | 0.00  | -0.03 | -0.03 |
| 1807 | DPYS     | 0.20  | 0.09  | 0.30  | -0.12 |
| 1808 | DPYSL2   | -0.11 | -0.18 | -0.19 | 0.09  |
| 1809 | DPYSL3   | 0.00  | 0.00  | 0.00  | NaN   |
| 1810 | DR1      | -0.02 | 0.00  | 0.00  | 0.12  |
| 1811 | SLC26A3  | 0.02  | 0.00  | -0.03 | 0.14  |
| 1812 | DRD1     | 0.00  | 0.00  | -0.03 | 0.04  |
| 1813 | DRD2     | -0.07 | 0.00  | 0.00  | 0.17  |
| 1814 | DRD3     | 0.00  | 0.00  | -0.03 | -0.12 |
| 1815 | DRD4     | 0.00  | 0.00  | 0.00  | NaN   |
| 1819 | DRG2     | -0.05 | 0.00  | 0.00  | 0.06  |
| 1821 | DRP2     | -0.05 | 0.00  | -0.08 | -0.10 |
| 1823 | DSC1     | 0.02  | -0.09 | 0.00  | -0.09 |
| 1824 | DSC2     | 0.02  | -0.09 | 0.00  | 0.06  |
| 1825 | DSC3     | 0.02  | -0.09 | 0.00  | 0.05  |
| 1826 | DSCAM    | 0.00  | 0.00  | 0.00  | 0.15  |
| 1827 | DSCR1    | 0.00  | 0.00  | 0.00  | -0.03 |
| 1828 | DSG1     | 0.02  | -0.09 | 0.00  | -0.03 |
| 1830 | DSG3     | 0.02  | -0.09 | 0.00  | 0.07  |
| 1832 | DSP      | -0.02 | 0.00  | 0.05  | 0.07  |
| 1836 | SLC26A2  | 0.00  | 0.00  | 0.00  | NaN   |
| 1837 | DTNA     | 0.02  | -0.09 | -0.03 | 0.33  |
| 1838 | DTNB     | -0.02 | 0.00  | 0.00  | 0.04  |
| 1843 | DUSP1    | 0.00  | 0.00  | -0.03 | 0.11  |
| 1844 | DUSP2    | 0.00  | 0.00  | 0.00  | NaN   |
| 1845 | DUSP3    | -0.04 | 0.00  | 0.00  | 0.15  |
| 1846 | DUSP4    | -0.13 | -0.18 | -0.19 | 0.12  |

|      |        |       |       |       |       |
|------|--------|-------|-------|-------|-------|
| 1847 | DUSP5  | -0.04 | 0.00  | 0.00  | 0.03  |
| 1848 | DUSP6  | 0.00  | 0.00  | 0.00  | NaN   |
| 1852 | DUSP9  | 0.00  | 0.00  | 0.00  | -0.08 |
| 1854 | DUT    | -0.05 | 0.00  | -0.08 | 0.20  |
| 1856 | DVL2   | -0.05 | 0.00  | 0.00  | 0.08  |
| 1857 | DVL3   | 0.05  | 0.00  | 0.05  | 0.36  |
| 1859 | DYRK1A | 0.02  | 0.00  | 0.00  | 0.29  |
| 1869 | E2F1   | 0.00  | 0.00  | 0.00  | NaN   |
| 1870 | E2F2   | 0.00  | 0.00  | 0.00  | NaN   |
| 1871 | E2F3   | 0.00  | 0.00  | 0.08  | 0.39  |
| 1874 | E2F4   | -0.04 | 0.00  | 0.00  | 0.06  |
| 1875 | E2F5   | 0.15  | 0.00  | 0.14  | 0.24  |
| 1876 | E2F6   | -0.02 | 0.00  | 0.00  | -0.02 |
| 1877 | E4F1   | 0.04  | 0.09  | 0.00  | 0.18  |
| 1889 | ECE1   | 0.00  | 0.00  | 0.00  | NaN   |
| 1890 | ECGF1  | 0.00  | 0.09  | 0.03  | 0.12  |
| 1891 | ECH1   | 0.02  | 0.09  | 0.05  | 0.19  |
| 1892 | ECHS1  | -0.02 | 0.00  | 0.00  | 0.04  |
| 1893 | ECM1   | 0.07  | 0.18  | 0.14  | 0.10  |
| 1901 | EDG1   | -0.02 | 0.00  | -0.03 | -0.13 |
| 1902 | EDG2   | -0.02 | 0.00  | 0.00  | 0.03  |
| 1906 | EDN1   | 0.00  | 0.00  | 0.11  | -0.11 |
| 1907 | EDN2   | 0.00  | 0.00  | 0.00  | NaN   |
| 1908 | EDN3   | 0.05  | 0.09  | 0.00  | 0.00  |
| 1909 | EDNRA  | -0.02 | 0.00  | -0.03 | 0.31  |
| 1910 | EDNRB  | -0.04 | -0.09 | -0.14 | 0.19  |
| 1915 | EEF1A1 | 0.00  | 0.00  | -0.03 | 0.05  |
| 1933 | EEF1B2 | 0.00  | 0.00  | 0.00  | NaN   |
| 1936 | EEF1D  | 0.16  | 0.00  | 0.35  | 0.22  |
| 1937 | EEF1G  | -0.02 | 0.00  | 0.03  | 0.16  |
| 1938 | EEF2   | 0.00  | 0.00  | 0.00  | NaN   |
| 1939 | LGTN   | 0.07  | 0.00  | 0.00  | 0.30  |
| 1942 | EFNA1  | 0.09  | 0.00  | 0.14  | 0.25  |
| 1943 | EFNA2  | 0.00  | 0.00  | -0.03 | -0.04 |
| 1944 | EFNA3  | 0.09  | 0.00  | 0.14  | 0.08  |
| 1945 | EFNA4  | 0.09  | 0.00  | 0.14  | 0.24  |
| 1946 | EFNA5  | 0.00  | 0.00  | -0.11 | -0.09 |
| 1947 | EFNB1  | -0.04 | 0.00  | -0.05 | -0.09 |
| 1948 | EFNB2  | -0.02 | 0.00  | -0.05 | 0.09  |
| 1949 | EFNB3  | -0.07 | 0.00  | 0.00  | 0.01  |
| 1950 | EGF    | -0.02 | 0.00  | 0.00  | -0.01 |
| 1951 | CELSR3 | -0.04 | 0.00  | 0.00  | 0.07  |
| 1952 | CELSR2 | 0.00  | 0.00  | -0.03 | 0.23  |
| 1956 | EGFR   | -0.02 | 0.00  | 0.11  | 0.63  |
| 1958 | EGR1   | 0.00  | 0.00  | -0.03 | 0.02  |
| 1959 | EGR2   | -0.02 | 0.00  | -0.05 | -0.05 |
| 1960 | EGR3   | -0.13 | -0.18 | -0.22 | 0.15  |



|      |          |       |       |       |       |
|------|----------|-------|-------|-------|-------|
| 1961 | EGR4     | 0.00  | 0.00  | 0.00  | NaN   |
| 1962 | EHHADH   | 0.04  | 0.00  | 0.00  | 0.18  |
| 1965 | EIF2S1   | -0.02 | 0.00  | 0.00  | 0.23  |
| 1967 | EIF2B1   | 0.02  | 0.00  | 0.00  | 0.25  |
| 1968 | EIF2S3   | -0.05 | 0.00  | -0.11 | 0.13  |
| 1969 | EPHA2    | -0.02 | 0.09  | 0.00  | -0.02 |
| 1973 | EIF4A1   | -0.05 | 0.00  | 0.00  | 0.11  |
| 1974 | EIF4A2   | 0.04  | 0.00  | 0.03  | 0.20  |
| 1975 | EIF4B    | 0.02  | 0.00  | -0.03 | 0.17  |
| 1977 | EIF4E    | -0.04 | 0.00  | 0.03  | 0.22  |
| 1978 | EIF4EBP1 | 0.18  | 0.09  | 0.08  | 0.58  |
| 1979 | EIF4EBP2 | -0.02 | 0.00  | -0.03 | 0.10  |
| 1981 | EIF4G1   | 0.05  | 0.00  | 0.05  | 0.33  |
| 1982 | EIF4G2   | 0.00  | 0.00  | -0.05 | 0.02  |
| 1983 | EIF5     | 0.00  | 0.00  | 0.00  | NaN   |
| 1984 | EIF5A    | -0.05 | 0.00  | 0.00  | 0.17  |
| 1990 | ELA1     | 0.02  | 0.00  | -0.03 | 0.13  |
| 1991 | ELA2     | 0.00  | 0.00  | -0.03 | 0.07  |
| 1992 | SERPINB1 | -0.02 | 0.00  | 0.00  | 0.40  |
| 1993 | ELAVL2   | -0.11 | 0.00  | -0.05 | 0.15  |
| 1994 | ELAVL1   | 0.00  | -0.09 | 0.00  | 0.04  |
| 1995 | ELAVL3   | 0.00  | 0.00  | 0.00  | NaN   |
| 1996 | ELAVL4   | 0.00  | 0.00  | -0.03 | -0.05 |
| 1997 | ELF1     | -0.05 | 0.00  | -0.05 | 0.14  |
| 1998 | ELF2     | 0.00  | 0.00  | 0.00  | NaN   |
| 2000 | ELF4     | -0.05 | 0.00  | -0.08 | 0.20  |
| 2001 | ELF5     | 0.04  | 0.00  | -0.03 | 0.09  |
| 2002 | ELK1     | -0.05 | 0.00  | -0.08 | 0.16  |
| 2004 | ELK3     | 0.00  | 0.09  | 0.00  | 0.03  |
| 2005 | ELK4     | 0.07  | 0.00  | 0.03  | 0.04  |
| 2006 | ELN      | 0.02  | 0.00  | 0.05  | 0.17  |
| 2009 | EML1     | 0.02  | 0.00  | 0.03  | 0.06  |
| 2010 | EMD      | 0.00  | 0.00  | -0.03 | -0.07 |
| 2012 | EMP1     | 0.00  | -0.09 | 0.05  | 0.30  |
| 2013 | EMP2     | 0.04  | 0.00  | 0.00  | 0.15  |
| 2014 | EMP3     | 0.00  | 0.00  | -0.03 | 0.36  |
| 2015 | EMR1     | 0.00  | -0.09 | 0.00  | 0.00  |
| 2016 | EMX1     | 0.00  | 0.00  | 0.03  | -0.03 |
| 2018 | EMX2     | -0.04 | 0.00  | 0.00  | 0.18  |
| 2019 | EN1      | 0.00  | 0.00  | 0.00  | NaN   |
| 2020 | EN2      | 0.02  | 0.00  | -0.03 | 0.01  |
| 2021 | ENDOG    | 0.02  | 0.00  | 0.00  | 0.09  |
| 2022 | ENG      | 0.00  | 0.00  | 0.00  | 0.11  |
| 2023 | ENO1     | -0.02 | 0.00  | 0.00  | 0.09  |
| 2026 | ENO2     | -0.02 | 0.09  | 0.05  | 0.17  |
| 2027 | ENO3     | -0.04 | 0.00  | 0.00  | 0.07  |
| 2028 | ENPEP    | -0.02 | 0.00  | 0.00  | 0.02  |

|      |         |       |       |       |       |
|------|---------|-------|-------|-------|-------|
| 2029 | ENSA    | 0.07  | 0.09  | 0.14  | 0.15  |
| 2030 | SLC29A1 | 0.00  | 0.00  | 0.11  | 0.36  |
| 2033 | EP300   | -0.02 | 0.00  | -0.03 | 0.08  |
| 2034 | EPAS1   | 0.00  | 0.00  | 0.00  | NaN   |
| 2035 | EPB41   | -0.02 | 0.09  | 0.00  | 0.01  |
| 2037 | EPB41L2 | 0.00  | 0.00  | 0.08  | 0.13  |
| 2038 | EPB42   | -0.04 | 0.00  | -0.14 | 0.18  |
| 2039 | EPB49   | -0.15 | -0.09 | -0.16 | -0.03 |
| 2041 | EPHA1   | 0.02  | 0.00  | 0.00  | 0.13  |
| 2042 | EPHA3   | -0.04 | 0.00  | 0.03  | 0.04  |
| 2043 | EPHA4   | 0.00  | 0.00  | 0.00  | NaN   |
| 2044 | EPHA5   | -0.02 | 0.00  | 0.00  | 0.09  |
| 2045 | EPHA7   | -0.02 | 0.00  | -0.03 | -0.03 |
| 2047 | EPHB1   | 0.00  | 0.00  | 0.00  | NaN   |
| 2048 | EPHB2   | 0.00  | 0.00  | 0.00  | NaN   |
| 2049 | EPHB3   | 0.04  | 0.00  | 0.03  | 0.04  |
| 2050 | EPHB4   | 0.02  | 0.00  | 0.00  | 0.01  |
| 2051 | EPHB6   | 0.02  | 0.00  | 0.00  | 0.01  |
| 2052 | EPHX1   | 0.07  | 0.00  | 0.03  | 0.08  |
| 2053 | EPHX2   | -0.09 | -0.18 | -0.19 | 0.19  |
| 2055 | CLN8    | -0.18 | -0.18 | -0.16 | 0.32  |
| 2056 | EPO     | 0.02  | 0.00  | 0.00  | -0.09 |
| 2057 | EPOR    | 0.00  | 0.00  | 0.00  | NaN   |
| 2058 | EPRS    | 0.07  | 0.00  | 0.00  | 0.29  |
| 2059 | EPS8    | 0.00  | -0.09 | 0.05  | -0.07 |
| 2060 | EPS15   | 0.00  | 0.00  | -0.03 | -0.07 |
| 2063 | NR2F6   | 0.04  | 0.00  | 0.00  | 0.30  |
| 2064 | ERBB2   | 0.02  | 0.91  | 0.05  | 0.76  |
| 2065 | ERBB3   | 0.04  | 0.00  | 0.00  | 0.26  |
| 2066 | ERBB4   | 0.00  | 0.00  | 0.00  | NaN   |
| 2067 | ERCC1   | -0.02 | 0.00  | -0.03 | 0.18  |
| 2068 | ERCC2   | -0.02 | 0.00  | -0.03 | 0.15  |
| 2069 | EREG    | -0.02 | 0.00  | 0.00  | -0.13 |
| 2070 | EYA4    | -0.02 | 0.00  | 0.08  | 0.08  |
| 2071 | ERCC3   | -0.02 | 0.00  | 0.00  | 0.02  |
| 2072 | ERCC4   | 0.02  | 0.00  | 0.00  | -0.20 |
| 2073 | ERCC5   | 0.00  | 0.00  | -0.05 | 0.02  |
| 2074 | ERCC6   | -0.02 | 0.00  | -0.03 | -0.01 |
| 2077 | ERF     | 0.02  | 0.00  | -0.03 | 0.04  |
| 2078 | ERG     | 0.00  | 0.00  | 0.00  | 0.08  |
| 2079 | ERH     | -0.02 | 0.00  | 0.00  | 0.15  |
| 2081 | ERN1    | 0.15  | 0.18  | 0.03  | -0.18 |
| 2098 | ESD     | -0.07 | 0.00  | -0.14 | 0.35  |
| 2099 | ESR1    | 0.02  | 0.00  | 0.00  | 0.21  |
| 2100 | ESR2    | -0.02 | 0.00  | 0.00  | 0.07  |
| 2101 | ESRRA   | 0.00  | 0.00  | 0.03  | 0.16  |
| 2103 | ESRRB   | -0.02 | 0.00  | 0.00  | -0.02 |

|      |       |       |       |       |       |
|------|-------|-------|-------|-------|-------|
| 2104 | ESRRG | 0.07  | 0.00  | 0.00  | 0.11  |
| 2107 | ETF1  | 0.00  | 0.00  | -0.03 | 0.14  |
| 2108 | ETFA  | 0.00  | 0.00  | -0.05 | 0.02  |
| 2109 | ETFB  | 0.00  | 0.00  | -0.03 | 0.24  |
| 2110 | ETFDH | -0.02 | 0.00  | -0.05 | 0.20  |
| 2113 | ETS1  | -0.05 | 0.00  | -0.03 | 0.05  |
| 2114 | ETS2  | 0.00  | 0.00  | 0.00  | 0.00  |
| 2115 | ETV1  | -0.02 | 0.00  | 0.00  | 0.02  |
| 2117 | ETV3  | 0.04  | 0.00  | 0.11  | 0.02  |
| 2119 | ETV5  | 0.04  | 0.00  | 0.03  | 0.19  |
| 2120 | ETV6  | 0.00  | -0.09 | 0.08  | 0.34  |
| 2121 | EVC   | -0.02 | 0.00  | 0.00  | 0.00  |
| 2122 | EVI1  | 0.02  | 0.00  | 0.03  | -0.11 |
| 2125 | EVPL  | 0.04  | 0.27  | 0.03  | 0.20  |
| 2128 | EVX1  | 0.00  | 0.18  | 0.00  | -0.03 |
| 2130 | EWSR1 | -0.02 | 0.00  | 0.03  | 0.07  |
| 2131 | EXT1  | 0.22  | 0.18  | 0.35  | 0.33  |
| 2132 | EXT2  | -0.02 | 0.00  | -0.08 | 0.40  |
| 2134 | EXTL1 | -0.02 | 0.00  | 0.00  | 0.05  |
| 2135 | EXTL2 | -0.02 | 0.00  | -0.03 | -0.02 |
| 2137 | EXTL3 | -0.11 | -0.18 | -0.19 | 0.07  |
| 2138 | EYA1  | 0.13  | 0.00  | 0.14  | 0.07  |
| 2139 | EYA2  | 0.04  | 0.00  | 0.03  | 0.07  |
| 2140 | EYA3  | -0.02 | 0.09  | 0.00  | 0.00  |
| 2145 | EZH1  | -0.04 | 0.00  | 0.00  | 0.23  |
| 2146 | EZH2  | 0.02  | 0.00  | 0.00  | 0.08  |
| 2147 | F2    | -0.02 | 0.09  | -0.03 | -0.10 |
| 2149 | F2R   | 0.00  | 0.00  | -0.14 | 0.08  |
| 2150 | F2RL1 | 0.00  | 0.00  | -0.14 | 0.16  |
| 2152 | F3    | -0.02 | 0.00  | 0.00  | -0.04 |
| 2153 | F5    | 0.02  | 0.00  | 0.05  | -0.07 |
| 2155 | F7    | 0.00  | 0.00  | 0.00  | 0.25  |
| 2157 | F8    | -0.04 | 0.00  | -0.11 | 0.11  |
| 2158 | F9    | -0.02 | 0.09  | -0.11 | 0.00  |
| 2159 | F10   | 0.00  | 0.00  | 0.00  | 0.20  |
| 2160 | F11   | -0.02 | 0.00  | -0.08 | 0.15  |
| 2161 | F12   | 0.00  | 0.00  | 0.00  | NaN   |
| 2162 | F13A1 | -0.02 | 0.00  | 0.05  | 0.03  |
| 2165 | F13B  | 0.07  | 0.00  | 0.05  | -0.22 |
| 2166 | FAAH  | 0.00  | 0.00  | 0.03  | 0.20  |
| 2167 | FABP4 | 0.13  | 0.00  | 0.14  | -0.16 |
| 2168 | FABP1 | 0.00  | 0.00  | 0.00  | NaN   |
| 2169 | FABP2 | 0.00  | 0.00  | -0.03 | -0.15 |
| 2170 | FABP3 | 0.02  | 0.09  | 0.00  | 0.07  |
| 2171 | FABP5 | 0.13  | 0.00  | 0.14  | -0.03 |
| 2172 | FABP6 | 0.00  | 0.00  | -0.03 | 0.06  |
| 2173 | FABP7 | -0.02 | 0.00  | 0.00  | 0.10  |

|      |        |       |       |       |       |
|------|--------|-------|-------|-------|-------|
| 2175 | FANCA  | -0.04 | 0.00  | 0.00  | 0.14  |
| 2176 | FANCC  | -0.02 | 0.00  | 0.00  | 0.09  |
| 2178 | FANCE  | 0.00  | 0.00  | 0.05  | 0.23  |
| 2184 | FAH    | 0.00  | 0.00  | -0.03 | 0.05  |
| 2185 | PTK2B  | -0.09 | -0.18 | -0.19 | 0.28  |
| 2188 | FANCF  | 0.00  | 0.00  | -0.05 | 0.11  |
| 2189 | FANCG  | 0.00  | 0.00  | 0.00  | -0.21 |
| 2191 | FAP    | -0.02 | 0.00  | 0.03  | 0.02  |
| 2192 | FBLN1  | -0.04 | 0.00  | -0.03 | 0.21  |
| 2195 | FAT    | -0.02 | 0.00  | -0.08 | -0.02 |
| 2196 | FAT2   | 0.00  | 0.00  | 0.00  | NaN   |
| 2197 | FAU    | 0.02  | 0.00  | 0.03  | 0.12  |
| 2199 | FBLN2  | 0.02  | 0.00  | 0.00  | 0.01  |
| 2200 | FBN1   | -0.04 | 0.00  | -0.08 | 0.05  |
| 2201 | FBN2   | 0.00  | 0.00  | -0.05 | 0.11  |
| 2202 | EFEMP1 | 0.00  | 0.00  | 0.00  | NaN   |
| 2203 | FBP1   | -0.02 | 0.00  | 0.00  | -0.01 |
| 2204 | FCAR   | 0.00  | 0.09  | -0.03 | -0.03 |
| 2205 | FCER1A | 0.04  | 0.00  | 0.16  | -0.17 |
| 2206 | MS4A1  | -0.02 | 0.00  | 0.03  | 0.11  |
| 2207 | FCER1G | 0.11  | 0.00  | 0.14  | -0.14 |
| 2208 | FCER2  | 0.00  | -0.09 | 0.00  | 0.04  |
| 2209 | FCGR1A | 0.05  | 0.00  | 0.14  | 0.10  |
| 2212 | FCGR2A | 0.07  | 0.00  | 0.14  | -0.08 |
| 2213 | FCGR2B | 0.07  | 0.00  | 0.14  | -0.05 |
| 2214 | FCGR3A | 0.07  | 0.00  | 0.14  | -0.06 |
| 2217 | FCGRT  | 0.02  | 0.00  | -0.03 | 0.11  |
| 2218 | FCMD   | -0.04 | 0.00  | 0.00  | 0.04  |
| 2219 | FCN1   | 0.02  | 0.00  | 0.03  | -0.04 |
| 2220 | FCN2   | 0.02  | 0.00  | 0.03  | -0.05 |
| 2222 | FDFT1  | -0.15 | -0.09 | -0.22 | 0.39  |
| 2224 | FDPS   | 0.09  | 0.00  | 0.14  | 0.39  |
| 2230 | FDX1   | -0.07 | -0.09 | 0.00  | 0.10  |
| 2232 | FDXR   | 0.05  | 0.27  | 0.03  | 0.27  |
| 2235 | FECH   | -0.02 | 0.00  | -0.03 | 0.14  |
| 2237 | FEN1   | -0.02 | 0.00  | 0.03  | 0.17  |
| 2239 | GPC4   | -0.04 | 0.00  | -0.08 | 0.09  |
| 2241 | FER    | 0.00  | 0.00  | -0.11 | 0.04  |
| 2242 | FES    | 0.02  | 0.00  | 0.03  | 0.12  |
| 2243 | FGA    | -0.02 | 0.00  | -0.03 | 0.20  |
| 2244 | FGB    | -0.02 | 0.00  | -0.03 | 0.03  |
| 2245 | FGD1   | -0.04 | 0.00  | -0.05 | -0.17 |
| 2247 | FGF2   | 0.00  | 0.00  | -0.03 | 0.02  |
| 2248 | FGF3   | 0.18  | 0.18  | 0.03  | -0.13 |
| 2250 | FGF5   | -0.04 | 0.00  | -0.03 | 0.13  |
| 2251 | FGF6   | -0.02 | 0.09  | 0.08  | -0.03 |
| 2253 | FGF8   | -0.02 | 0.00  | -0.03 | -0.02 |

|      |        |       |       |       |       |
|------|--------|-------|-------|-------|-------|
| 2254 | FGF9   | -0.07 | 0.00  | -0.11 | 0.14  |
| 2258 | FGF13  | -0.02 | 0.00  | -0.08 | 0.05  |
| 2259 | FGF14  | -0.02 | 0.00  | -0.05 | -0.05 |
| 2260 | FGFR1  | 0.18  | 0.09  | 0.11  | 0.51  |
| 2261 | FGFR3  | -0.02 | 0.00  | 0.00  | 0.10  |
| 2262 | GPC5   | -0.02 | 0.00  | -0.08 | -0.09 |
| 2263 | FGFR2  | -0.04 | 0.00  | 0.03  | 0.25  |
| 2264 | FGFR4  | 0.00  | 0.00  | 0.00  | NaN   |
| 2266 | FGG    | -0.02 | 0.00  | -0.03 | 0.07  |
| 2267 | FGL1   | -0.16 | -0.18 | -0.22 | 0.02  |
| 2268 | FGR    | -0.02 | 0.00  | 0.00  | -0.03 |
| 2271 | FH     | 0.07  | 0.00  | 0.05  | 0.29  |
| 2272 | FHIT   | -0.04 | 0.00  | 0.00  | 0.09  |
| 2273 | FHL1   | -0.04 | 0.00  | -0.08 | 0.08  |
| 2274 | FHL2   | 0.00  | 0.00  | 0.00  | NaN   |
| 2275 | FHL3   | 0.00  | 0.00  | 0.00  | NaN   |
| 2277 | FIGF   | -0.05 | 0.00  | -0.14 | -0.12 |
| 2280 | FKBP1A | 0.02  | 0.00  | -0.03 | 0.12  |
| 2281 | FKBP1B | -0.02 | 0.00  | 0.00  | 0.08  |
| 2286 | FKBP2  | 0.00  | 0.00  | 0.03  | 0.12  |
| 2287 | FKBP3  | 0.00  | 0.00  | -0.05 | 0.31  |
| 2288 | FKBP4  | -0.02 | 0.09  | 0.08  | 0.15  |
| 2289 | FKBP5  | 0.00  | 0.00  | 0.05  | 0.09  |
| 2290 | FOXF1B | -0.02 | 0.00  | -0.03 | 0.07  |
| 2294 | FOXF1  | -0.07 | 0.00  | 0.00  | 0.04  |
| 2295 | FOXF2  | -0.04 | 0.00  | 0.05  | 0.19  |
| 2297 | FOXD1  | 0.00  | 0.00  | -0.11 | 0.13  |
| 2299 | FOXI1  | 0.00  | 0.00  | -0.03 | 0.11  |
| 2301 | FOXJ3  | 0.00  | 0.00  | 0.00  | 0.17  |
| 2302 | FOXJ1  | 0.04  | 0.18  | 0.03  | 0.12  |
| 2304 | FOXJ2  | -0.02 | 0.00  | 0.00  | -0.08 |
| 2305 | FOXM1  | -0.02 | 0.09  | 0.08  | 0.23  |
| 2306 | FOXD2  | 0.00  | 0.00  | 0.00  | 0.15  |
| 2308 | FOXO1A | -0.05 | 0.00  | -0.08 | 0.31  |
| 2309 | FOXO3A | 0.02  | 0.00  | 0.00  | 0.33  |
| 2313 | FLI1   | -0.05 | 0.00  | -0.03 | 0.26  |
| 2314 | FLII   | -0.05 | 0.00  | 0.00  | 0.23  |
| 2315 | MLANA  | -0.05 | 0.00  | -0.05 | 0.18  |
| 2316 | FLNA   | 0.00  | 0.00  | -0.03 | 0.37  |
| 2317 | FLNB   | -0.04 | 0.00  | 0.00  | -0.08 |
| 2318 | FLNC   | 0.02  | 0.00  | -0.03 | -0.02 |
| 2319 | FLOT2  | 0.02  | 0.09  | 0.00  | 0.36  |
| 2322 | FLT3   | -0.05 | 0.00  | -0.05 | -0.08 |
| 2323 | FLT3LG | 0.02  | 0.00  | -0.03 | 0.13  |
| 2324 | FLT4   | 0.00  | 0.00  | -0.03 | -0.07 |
| 2326 | FMO1   | 0.02  | 0.00  | 0.05  | -0.16 |
| 2327 | FMO2   | 0.02  | 0.00  | 0.05  | 0.21  |

|      |        |       |       |       |       |
|------|--------|-------|-------|-------|-------|
| 2328 | FMO3   | 0.02  | 0.00  | 0.05  | 0.01  |
| 2329 | FMO4   | 0.02  | 0.00  | 0.05  | 0.06  |
| 2330 | FMO5   | 0.07  | 0.00  | 0.14  | 0.02  |
| 2331 | FMOD   | 0.07  | 0.00  | 0.05  | 0.03  |
| 2332 | FMR1   | -0.05 | 0.00  | -0.11 | 0.24  |
| 2335 | FN1    | 0.00  | 0.00  | 0.00  | NaN   |
| 2339 | FNTA   | 0.02  | 0.09  | 0.11  | 0.31  |
| 2342 | FNTB   | -0.02 | 0.00  | 0.00  | 0.00  |
| 2346 | FOLH1  | -0.02 | 0.00  | 0.00  | 0.07  |
| 2348 | FOLR1  | -0.02 | 0.09  | 0.00  | 0.14  |
| 2350 | FOLR2  | -0.02 | 0.09  | 0.00  | 0.05  |
| 2352 | FOLR3  | -0.02 | 0.09  | 0.00  | 0.02  |
| 2353 | FOS    | -0.02 | 0.00  | 0.00  | -0.09 |
| 2354 | FOSB   | -0.02 | 0.00  | -0.03 | 0.08  |
| 2355 | FOSL2  | 0.00  | 0.00  | 0.00  | NaN   |
| 2356 | FPGS   | 0.00  | 0.00  | 0.00  | 0.10  |
| 2357 | FPR1   | 0.00  | -0.09 | -0.03 | 0.12  |
| 2358 | FPRL1  | 0.00  | -0.09 | -0.03 | 0.15  |
| 2359 | FPRL2  | 0.00  | -0.09 | -0.03 | 0.09  |
| 2444 | FRK    | 0.00  | 0.00  | 0.00  | 0.31  |
| 2475 | FRAP1  | 0.00  | 0.00  | 0.00  | NaN   |
| 2483 | FRG1   | -0.05 | -0.09 | -0.03 | -0.05 |
| 2487 | FRZB   | 0.02  | 0.00  | -0.03 | 0.04  |
| 2488 | FSHB   | 0.02  | 0.00  | 0.03  | 0.05  |
| 2492 | FSHR   | 0.02  | 0.00  | 0.00  | -0.01 |
| 2494 | NR5A2  | 0.09  | 0.00  | 0.03  | 0.06  |
| 2495 | FTH1   | -0.02 | 0.09  | 0.03  | 0.13  |
| 2512 | FTL    | 0.00  | 0.00  | -0.03 | 0.38  |
| 2515 | ADAM2  | 0.09  | 0.09  | 0.05  | 0.09  |
| 2516 | NR5A1  | -0.02 | 0.00  | 0.00  | -0.02 |
| 2517 | FUCA1  | 0.00  | 0.00  | 0.00  | NaN   |
| 2521 | FUS    | 0.04  | 0.09  | 0.03  | 0.12  |
| 2523 | FUT1   | 0.00  | 0.00  | -0.03 | -0.29 |
| 2524 | FUT2   | 0.00  | 0.00  | -0.03 | 0.07  |
| 2525 | FUT3   | -0.02 | -0.09 | 0.00  | 0.14  |
| 2526 | FUT4   | -0.07 | 0.09  | 0.03  | 0.21  |
| 2527 | FUT5   | -0.02 | -0.09 | 0.00  | -0.01 |
| 2528 | FUT6   | -0.02 | -0.09 | 0.00  | 0.18  |
| 2530 | FUT8   | -0.02 | 0.00  | 0.00  | 0.06  |
| 2531 | FVT1   | -0.02 | -0.09 | 0.00  | 0.21  |
| 2533 | FYB    | 0.04  | 0.09  | 0.00  | 0.09  |
| 2534 | FYN    | 0.02  | 0.00  | 0.05  | -0.02 |
| 2538 | G6PC   | -0.04 | 0.00  | 0.00  | -0.05 |
| 2539 | G6PD   | -0.02 | 0.00  | -0.03 | 0.18  |
| 2548 | GAA    | 0.00  | 0.00  | 0.00  | NaN   |
| 2549 | GAB1   | 0.00  | 0.00  | 0.00  | NaN   |
| 2550 | GABBR1 | 0.00  | 0.00  | 0.05  | 0.03  |

|      |        |       |       |       |       |
|------|--------|-------|-------|-------|-------|
| 2551 | GABPA  | 0.00  | 0.00  | 0.03  | 0.00  |
| 2553 | GABPB2 | -0.04 | 0.00  | -0.08 | -0.01 |
| 2554 | GABRA1 | 0.00  | 0.00  | -0.03 | 0.02  |
| 2555 | GABRA2 | -0.04 | 0.00  | -0.05 | -0.09 |
| 2556 | GABRA3 | -0.02 | 0.00  | -0.11 | -0.06 |
| 2557 | GABRA4 | -0.04 | 0.00  | 0.00  | 0.03  |
| 2558 | GABRA5 | -0.02 | 0.09  | -0.08 | 0.23  |
| 2559 | GABRA6 | 0.00  | 0.00  | -0.03 | 0.04  |
| 2560 | GABRB1 | -0.04 | 0.00  | 0.00  | 0.11  |
| 2561 | GABRB2 | 0.00  | 0.00  | -0.03 | -0.09 |
| 2562 | GABRB3 | -0.02 | 0.09  | -0.08 | 0.01  |
| 2564 | GABRE  | -0.02 | 0.00  | -0.11 | 0.14  |
| 2566 | GABRG2 | 0.00  | 0.00  | -0.03 | -0.07 |
| 2567 | GABRG3 | -0.04 | 0.09  | -0.08 | 0.11  |
| 2568 | GABRP  | 0.00  | 0.00  | -0.03 | -0.16 |
| 2569 | GABRR1 | 0.02  | 0.00  | 0.03  | 0.03  |
| 2570 | GABRR2 | -0.02 | 0.00  | 0.00  | 0.06  |
| 2571 | GAD1   | 0.00  | 0.00  | 0.03  | 0.10  |
| 2572 | GAD2   | -0.02 | 0.00  | 0.00  | 0.21  |
| 2580 | GAK    | -0.09 | 0.00  | -0.03 | 0.07  |
| 2581 | GALC   | -0.04 | 0.00  | 0.00  | 0.43  |
| 2582 | GALE   | 0.00  | 0.00  | 0.00  | NaN   |
| 2584 | GALK1  | 0.05  | 0.27  | 0.03  | 0.40  |
| 2585 | GALK2  | -0.05 | 0.00  | -0.08 | 0.06  |
| 2586 | GAL    | 0.09  | 0.09  | 0.03  | -0.08 |
| 2587 | GALR1  | -0.02 | -0.09 | 0.00  | -0.10 |
| 2588 | GALNS  | -0.04 | 0.00  | 0.11  | 0.14  |
| 2589 | GALNT1 | 0.00  | -0.09 | -0.03 | 0.07  |
| 2590 | GALNT2 | 0.09  | 0.00  | 0.03  | 0.04  |
| 2591 | GALNT3 | -0.02 | 0.00  | 0.03  | 0.11  |
| 2592 | GALT   | 0.00  | 0.00  | 0.00  | 0.22  |
| 2593 | GAMT   | 0.00  | 0.00  | -0.03 | 0.17  |
| 2596 | GAP43  | 0.00  | 0.00  | -0.03 | 0.05  |
| 2617 | GARS   | -0.02 | 0.09  | -0.03 | 0.36  |
| 2618 | GART   | 0.00  | 0.00  | 0.00  | 0.17  |
| 2619 | GAS1   | -0.02 | 0.00  | 0.00  | 0.03  |
| 2620 | GAS2   | 0.00  | 0.00  | -0.05 | -0.05 |
| 2621 | GAS6   | 0.00  | 0.00  | 0.00  | 0.17  |
| 2623 | GATA1  | -0.04 | 0.00  | -0.05 | -0.08 |
| 2624 | GATA2  | 0.00  | 0.00  | -0.03 | -0.38 |
| 2625 | GATA3  | 0.00  | 0.00  | 0.16  | -0.14 |
| 2626 | GATA4  | -0.15 | -0.09 | -0.22 | -0.02 |
| 2627 | GATA6  | 0.00  | -0.09 | 0.03  | 0.02  |
| 2628 | GATM   | -0.04 | 0.00  | -0.11 | 0.08  |
| 2629 | GBA    | 0.09  | 0.00  | 0.14  | 0.25  |
| 2631 | GBAS   | 0.00  | 0.00  | 0.05  | 0.41  |
| 2632 | GBE1   | -0.05 | 0.00  | -0.03 | 0.18  |

|      |         |       |       |       |       |
|------|---------|-------|-------|-------|-------|
| 2633 | GBP1    | 0.00  | 0.00  | -0.03 | 0.01  |
| 2634 | GBP2    | 0.00  | 0.00  | -0.03 | 0.01  |
| 2637 | GBX2    | 0.00  | 0.00  | 0.00  | NaN   |
| 2638 | GC      | -0.02 | 0.00  | 0.00  | -0.10 |
| 2639 | GCDH    | 0.00  | -0.09 | 0.00  | 0.05  |
| 2641 | GCG     | -0.02 | 0.00  | 0.03  | -0.22 |
| 2643 | GCH1    | 0.00  | 0.00  | 0.00  | 0.24  |
| 2644 | GCHFR   | -0.02 | 0.00  | -0.14 | 0.10  |
| 2645 | GCK     | -0.02 | 0.00  | 0.08  | 0.15  |
| 2646 | GCKR    | 0.00  | 0.00  | 0.00  | NaN   |
| 2648 | GCN5L2  | -0.04 | 0.09  | 0.00  | 0.28  |
| 2649 | NR6A1   | -0.02 | 0.00  | 0.00  | 0.06  |
| 2650 | GCNT1   | -0.02 | 0.00  | 0.00  | 0.01  |
| 2651 | GCNT2   | -0.02 | 0.00  | 0.11  | 0.23  |
| 2653 | GCSH    | -0.09 | 0.00  | 0.00  | 0.15  |
| 2657 | GDF1    | 0.02  | 0.00  | 0.00  | 0.10  |
| 2658 | GDF2    | -0.02 | 0.00  | 0.00  | 0.08  |
| 2660 | GDF8    | 0.00  | 0.00  | 0.00  | NaN   |
| 2661 | GDF9    | 0.00  | 0.00  | -0.03 | 0.05  |
| 2662 | GDF10   | -0.02 | 0.00  | 0.00  | -0.01 |
| 2664 | GDI1    | 0.00  | 0.00  | -0.03 | 0.09  |
| 2665 | GDI2    | 0.00  | 0.00  | 0.11  | 0.25  |
| 2668 | GDNF    | 0.04  | 0.18  | 0.00  | 0.03  |
| 2669 | GEM     | 0.16  | 0.09  | 0.22  | 0.19  |
| 2670 | GFAP    | -0.05 | 0.00  | 0.00  | 0.14  |
| 2671 | GFER    | 0.04  | 0.18  | 0.00  | 0.22  |
| 2672 | GFI1    | -0.02 | 0.00  | -0.03 | 0.06  |
| 2673 | GFPT1   | 0.00  | 0.00  | 0.00  | NaN   |
| 2674 | GFRA1   | -0.04 | 0.00  | 0.03  | -0.13 |
| 2675 | GFRA2   | -0.13 | -0.18 | -0.22 | -0.04 |
| 2676 | GFRA3   | 0.00  | 0.00  | -0.03 | 0.02  |
| 2677 | GGCX    | 0.02  | 0.00  | 0.00  | 0.04  |
| 2678 | GGT1    | 0.00  | 0.00  | 0.03  | 0.12  |
| 2683 | B4GALT1 | -0.04 | 0.09  | 0.00  | 0.21  |
| 2687 | GGTLA1  | 0.00  | 0.00  | 0.05  | 0.11  |
| 2690 | GHR     | 0.02  | 0.09  | 0.00  | 0.21  |
| 2691 | GHRH    | 0.02  | 0.00  | 0.03  | -0.20 |
| 2692 | GHRHR   | -0.02 | 0.09  | -0.03 | -0.11 |
| 2693 | GHSR    | 0.04  | 0.00  | 0.00  | -0.10 |
| 2694 | GIF     | -0.04 | 0.00  | 0.00  | 0.04  |
| 2695 | GIP     | 0.07  | 0.18  | 0.00  | 0.19  |
| 2696 | GIPR    | -0.02 | 0.00  | 0.00  | -0.01 |
| 2697 | GJA1    | -0.02 | 0.00  | 0.03  | 0.04  |
| 2700 | GJA3    | -0.09 | 0.00  | -0.08 | 0.00  |
| 2702 | GJA5    | 0.07  | 0.00  | 0.11  | 0.02  |
| 2705 | GJB1    | -0.04 | 0.00  | -0.08 | -0.01 |
| 2710 | GK      | -0.07 | 0.00  | -0.11 | 0.30  |



|      |       |       |       |       |       |
|------|-------|-------|-------|-------|-------|
| 2717 | GLA   | -0.05 | 0.00  | -0.08 | 0.16  |
| 2719 | GPC3  | -0.04 | 0.00  | -0.08 | 0.00  |
| 2720 | GLB1  | 0.02  | 0.00  | -0.03 | 0.29  |
| 2729 | GCLC  | -0.02 | 0.00  | 0.08  | 0.14  |
| 2730 | GCLM  | -0.02 | 0.00  | 0.00  | 0.16  |
| 2731 | GLDC  | -0.05 | 0.00  | -0.05 | 0.09  |
| 2733 | GLE1L | 0.02  | 0.00  | 0.00  | 0.13  |
| 2734 | GLG1  | -0.09 | 0.00  | 0.00  | 0.23  |
| 2736 | GLI2  | 0.00  | 0.00  | 0.00  | NaN   |
| 2737 | GLI3  | -0.02 | 0.00  | 0.03  | 0.02  |
| 2739 | GLO1  | 0.02  | 0.00  | 0.05  | 0.08  |
| 2740 | GLP1R | 0.02  | 0.00  | 0.05  | 0.09  |
| 2741 | GLRA1 | 0.00  | 0.00  | 0.00  | NaN   |
| 2742 | GLRA2 | -0.05 | 0.00  | -0.14 | -0.13 |
| 2743 | GLRB  | -0.02 | 0.00  | -0.05 | 0.15  |
| 2744 | GLS   | 0.00  | 0.00  | 0.00  | NaN   |
| 2745 | GLRX  | 0.00  | 0.00  | -0.14 | 0.09  |
| 2746 | GLUD1 | -0.02 | 0.00  | -0.03 | 0.26  |
| 2752 | GLUL  | 0.04  | 0.00  | 0.03  | 0.21  |
| 2760 | GM2A  | 0.00  | 0.00  | 0.00  | NaN   |
| 2762 | GMDS  | -0.02 | 0.00  | 0.00  | 0.46  |
| 2764 | GMFB  | 0.00  | 0.00  | 0.00  | 0.26  |
| 2765 | GML   | 0.16  | 0.09  | 0.38  | 0.06  |
| 2766 | GMPR  | 0.00  | 0.00  | 0.05  | 0.04  |
| 2767 | GNA11 | 0.00  | 0.00  | 0.00  | NaN   |
| 2769 | GNA15 | 0.00  | 0.00  | 0.00  | NaN   |
| 2770 | GNAI1 | 0.02  | 0.00  | 0.03  | 0.25  |
| 2771 | GNAI2 | 0.00  | 0.00  | 0.03  | 0.11  |
| 2773 | GNAI3 | 0.00  | 0.00  | -0.03 | 0.07  |
| 2774 | GNAL  | -0.02 | -0.09 | 0.00  | 0.12  |
| 2775 | GNAO1 | -0.05 | 0.00  | 0.00  | 0.12  |
| 2776 | GNAQ  | -0.02 | 0.00  | 0.00  | 0.08  |
| 2778 | GNAS  | 0.05  | 0.09  | 0.03  | 0.19  |
| 2779 | GNAT1 | 0.00  | 0.00  | 0.03  | -0.04 |
| 2780 | GNAT2 | 0.00  | 0.00  | -0.03 | 0.00  |
| 2782 | GNB1  | -0.02 | 0.00  | 0.03  | 0.10  |
| 2783 | GNB2  | 0.09  | 0.00  | 0.08  | 0.11  |
| 2784 | GNB3  | -0.02 | 0.09  | 0.05  | 0.00  |
| 2785 | GNG3  | 0.00  | 0.00  | 0.03  | 0.03  |
| 2786 | GNG4  | 0.09  | 0.00  | 0.03  | 0.05  |
| 2787 | GNG5  | -0.02 | 0.00  | -0.03 | 0.08  |
| 2788 | GNG7  | 0.00  | 0.00  | 0.00  | NaN   |
| 2791 | GNG11 | 0.02  | 0.00  | 0.00  | 0.11  |
| 2792 | GNGT1 | 0.02  | 0.00  | 0.00  | 0.24  |
| 2794 | GNL1  | 0.00  | 0.00  | 0.05  | 0.15  |
| 2796 | GNRH1 | -0.11 | -0.18 | -0.19 | 0.23  |
| 2797 | GNRH2 | 0.02  | 0.00  | -0.03 | 0.00  |

|      |        |       |       |       |       |
|------|--------|-------|-------|-------|-------|
| 2798 | GNRHR  | -0.02 | 0.00  | 0.00  | 0.05  |
| 2799 | GNS    | 0.00  | 0.00  | 0.00  | NaN   |
| 2800 | GOLGA1 | -0.02 | 0.00  | 0.00  | -0.01 |
| 2801 | GOLGA2 | 0.02  | 0.00  | 0.00  | 0.11  |
| 2802 | GOLGA3 | 0.00  | 0.00  | 0.00  | NaN   |
| 2803 | GOLGA4 | 0.02  | 0.00  | 0.00  | 0.35  |
| 2804 | GOLGB1 | 0.00  | 0.00  | -0.03 | 0.06  |
| 2805 | GOT1   | -0.02 | 0.00  | -0.03 | 0.18  |
| 2806 | GOT2   | -0.07 | 0.00  | 0.00  | 0.32  |
| 2810 | SFN    | -0.02 | 0.00  | 0.00  | 0.03  |
| 2811 | GP1BA  | -0.04 | 0.00  | 0.00  | -0.02 |
| 2813 | GP2    | 0.02  | -0.09 | 0.00  | 0.28  |
| 2814 | GP5    | 0.02  | 0.09  | 0.00  | 0.02  |
| 2815 | GP9    | 0.00  | 0.00  | -0.03 | -0.22 |
| 2817 | GPC1   | 0.00  | 0.00  | 0.00  | NaN   |
| 2819 | GPD1   | 0.02  | 0.00  | -0.03 | 0.04  |
| 2820 | GPD2   | -0.02 | 0.00  | 0.03  | 0.08  |
| 2821 | GPI    | 0.00  | 0.00  | 0.05  | 0.15  |
| 2822 | GPLD1  | 0.00  | 0.00  | 0.03  | 0.01  |
| 2823 | GPM6A  | -0.02 | 0.00  | -0.05 | -0.07 |
| 2824 | GPM6B  | -0.05 | 0.00  | -0.14 | -0.05 |
| 2825 | GPR1   | 0.00  | 0.00  | 0.00  | NaN   |
| 2827 | GPR3   | -0.02 | 0.00  | 0.00  | 0.02  |
| 2828 | GPR4   | -0.02 | 0.00  | 0.00  | 0.18  |
| 2835 | GPR12  | -0.05 | 0.00  | -0.08 | -0.04 |
| 2838 | GPR15  | 0.00  | 0.00  | -0.03 | -0.08 |
| 2842 | GPR19  | 0.00  | -0.09 | 0.05  | 0.07  |
| 2843 | GPR20  | 0.16  | 0.00  | 0.41  | 0.16  |
| 2846 | GPR23  | -0.04 | 0.00  | -0.08 | -0.19 |
| 2850 | GPR27  | -0.05 | 0.00  | 0.00  | 0.02  |
| 2854 | GPR32  | 0.00  | 0.00  | -0.03 | -0.25 |
| 2859 | GPR35  | 0.00  | 0.00  | 0.00  | NaN   |
| 2861 | GPR37  | 0.00  | 0.00  | -0.03 | 0.17  |
| 2863 | GPR39  | -0.02 | 0.00  | 0.00  | 0.03  |
| 2874 | GPS2   | -0.05 | 0.00  | 0.00  | 0.10  |
| 2876 | GPX1   | 0.00  | 0.00  | 0.00  | NaN   |
| 2877 | GPX2   | -0.02 | 0.00  | 0.00  | -0.04 |
| 2878 | GPX3   | 0.00  | 0.00  | 0.00  | NaN   |
| 2879 | GPX4   | 0.00  | 0.00  | -0.03 | 0.15  |
| 2880 | GPX5   | 0.00  | 0.00  | 0.05  | 0.02  |
| 2885 | GRB2   | 0.05  | 0.18  | 0.05  | 0.37  |
| 2886 | GRB7   | 0.02  | 0.82  | 0.05  | 0.66  |
| 2887 | GRB10  | -0.05 | 0.00  | 0.03  | 0.23  |
| 2888 | GRB14  | -0.02 | 0.00  | 0.03  | 0.10  |
| 2890 | GRIA1  | 0.00  | 0.00  | 0.00  | NaN   |
| 2891 | GRIA2  | -0.02 | 0.00  | -0.05 | 0.02  |
| 2892 | GRIA3  | -0.05 | 0.00  | -0.08 | 0.03  |

|      |        |       |       |       |       |
|------|--------|-------|-------|-------|-------|
| 2893 | GRIA4  | -0.07 | -0.09 | 0.00  | -0.03 |
| 2895 | GRID2  | -0.04 | 0.00  | -0.03 | 0.08  |
| 2896 | GRN    | -0.05 | 0.00  | 0.00  | 0.29  |
| 2897 | GRIK1  | 0.00  | 0.00  | 0.00  | -0.02 |
| 2899 | GRIK3  | -0.02 | 0.00  | 0.00  | 0.09  |
| 2900 | GRIK4  | -0.07 | 0.00  | 0.00  | -0.05 |
| 2901 | GRIK5  | 0.02  | 0.00  | -0.03 | 0.06  |
| 2902 | GRIN1  | 0.02  | 0.00  | 0.03  | 0.16  |
| 2903 | GRIN2A | 0.04  | 0.00  | 0.00  | -0.12 |
| 2904 | GRIN2B | 0.00  | -0.09 | 0.05  | 0.08  |
| 2905 | GRIN2C | 0.05  | 0.27  | 0.03  | -0.04 |
| 2906 | GRIN2D | 0.00  | 0.00  | -0.03 | -0.11 |
| 2908 | NR3C1  | 0.00  | 0.00  | 0.00  | NaN   |
| 2909 | GRLF1  | -0.04 | 0.00  | -0.03 | 0.09  |
| 2911 | GRM1   | 0.02  | 0.00  | 0.00  | 0.14  |
| 2912 | GRM2   | 0.00  | 0.00  | 0.00  | NaN   |
| 2913 | GRM3   | 0.02  | 0.00  | 0.00  | 0.11  |
| 2914 | GRM4   | 0.00  | 0.00  | 0.05  | 0.01  |
| 2915 | GRM5   | -0.05 | 0.00  | 0.00  | -0.03 |
| 2916 | GRM6   | 0.00  | 0.00  | -0.03 | -0.01 |
| 2917 | GRM7   | 0.00  | 0.00  | 0.00  | 0.23  |
| 2918 | GRM8   | 0.02  | 0.00  | -0.03 | 0.14  |
| 2922 | GRP    | -0.02 | -0.09 | -0.03 | -0.02 |
| 2925 | GRPR   | -0.05 | 0.00  | -0.11 | 0.17  |
| 2926 | GRSF1  | -0.02 | 0.00  | 0.00  | 0.23  |
| 2931 | GSK3A  | 0.02  | 0.00  | -0.03 | -0.20 |
| 2932 | GSK3B  | 0.00  | 0.00  | -0.03 | -0.12 |
| 2934 | GSN    | -0.02 | 0.00  | 0.00  | 0.10  |
| 2935 | GSPT1  | 0.04  | 0.00  | 0.00  | 0.14  |
| 2936 | GSR    | -0.09 | -0.18 | -0.19 | 0.30  |
| 2937 | GSS    | 0.05  | 0.00  | 0.00  | 0.34  |
| 2940 | GSTA3  | -0.02 | 0.00  | 0.08  | 0.01  |
| 2941 | GSTA4  | -0.02 | 0.00  | 0.08  | 0.27  |
| 2944 | GSTM1  | 0.00  | 0.00  | -0.03 | 0.06  |
| 2946 | GSTM2  | 0.00  | 0.00  | -0.03 | 0.05  |
| 2947 | GSTM3  | 0.00  | 0.00  | -0.03 | -0.03 |
| 2948 | GSTM4  | 0.00  | 0.00  | -0.03 | 0.08  |
| 2949 | GSTM5  | 0.00  | 0.00  | -0.03 | -0.07 |
| 2950 | GSTP1  | 0.07  | 0.09  | 0.03  | -0.03 |
| 2952 | GSTT1  | 0.00  | 0.00  | 0.05  | -0.04 |
| 2954 | GSTZ1  | -0.02 | 0.00  | -0.03 | 0.17  |
| 2956 | MSH6   | 0.02  | 0.00  | 0.00  | 0.21  |
| 2957 | GTF2A1 | 0.00  | 0.00  | 0.00  | 0.01  |
| 2958 | GTF2A2 | -0.02 | 0.00  | -0.05 | 0.34  |
| 2960 | GTF2E1 | 0.00  | 0.00  | -0.03 | -0.11 |
| 2961 | GTF2E2 | -0.09 | -0.18 | -0.19 | 0.17  |
| 2962 | GTF2F1 | 0.00  | -0.09 | 0.00  | 0.13  |

|      |         |       |       |       |       |
|------|---------|-------|-------|-------|-------|
| 2963 | GTF2F2  | -0.05 | 0.00  | -0.11 | 0.04  |
| 2965 | GTF2H1  | 0.00  | 0.00  | -0.05 | 0.05  |
| 2967 | GTF2H3  | 0.02  | 0.00  | 0.00  | 0.27  |
| 2968 | GTF2H4  | 0.02  | 0.00  | 0.05  | 0.25  |
| 2972 | BRF1    | -0.02 | 0.00  | 0.08  | 0.05  |
| 2975 | GTF3C1  | 0.02  | 0.00  | 0.00  | 0.18  |
| 2976 | GTF3C2  | 0.00  | 0.00  | 0.00  | NaN   |
| 2977 | GUCY1A2 | -0.07 | -0.09 | 0.00  | -0.03 |
| 2979 | GUCA1B  | 0.00  | 0.00  | 0.08  | -0.19 |
| 2981 | GUCA2B  | 0.00  | 0.00  | 0.00  | NaN   |
| 2982 | GUCY1A3 | -0.02 | 0.00  | -0.03 | 0.09  |
| 2983 | GUCY1B3 | -0.02 | 0.00  | -0.03 | 0.18  |
| 2984 | GUCY2C  | 0.00  | -0.09 | 0.05  | 0.09  |
| 2986 | GUCY2F  | -0.05 | 0.00  | -0.08 | -0.04 |
| 2987 | GUK1    | 0.09  | 0.00  | 0.03  | 0.04  |
| 2990 | GUSB    | 0.00  | 0.00  | 0.05  | 0.13  |
| 2993 | GYP A   | 0.00  | 0.00  | 0.00  | NaN   |
| 2995 | GYP C   | 0.00  | 0.00  | 0.00  | NaN   |
| 2997 | GYS1    | 0.00  | 0.00  | -0.03 | -0.27 |
| 2998 | GYS2    | 0.00  | -0.09 | 0.05  | -0.12 |
| 3000 | GUCY2D  | -0.05 | 0.00  | 0.00  | 0.06  |
| 3001 | GZMA    | 0.00  | 0.00  | -0.11 | 0.02  |
| 3003 | GZMK    | 0.00  | 0.00  | -0.11 | -0.02 |
| 3004 | GZMM    | 0.00  | 0.00  | -0.03 | 0.01  |
| 3005 | H1F0    | -0.04 | 0.00  | 0.03  | 0.06  |
| 3014 | H2AFX   | -0.05 | 0.00  | 0.00  | 0.23  |
| 3015 | H2AFZ   | -0.02 | 0.00  | 0.03  | 0.11  |
| 3021 | H3F3B   | 0.05  | 0.27  | 0.03  | 0.43  |
| 3026 | HABP2   | -0.04 | 0.00  | 0.00  | 0.02  |
| 3029 | HAGH    | 0.04  | 0.18  | 0.00  | 0.37  |
| 3030 | HADHA   | -0.02 | 0.00  | 0.00  | 0.09  |
| 3032 | HADHB   | -0.02 | 0.00  | 0.00  | 0.04  |
| 3034 | HAL     | 0.00  | 0.09  | 0.00  | 0.07  |
| 3035 | HARS    | 0.00  | 0.00  | 0.00  | NaN   |
| 3036 | HAS1    | 0.00  | -0.09 | -0.03 | -0.15 |
| 3037 | HAS2    | 0.18  | 0.18  | 0.35  | 0.07  |
| 3043 | HBB     | -0.02 | -0.09 | -0.03 | 0.07  |
| 3045 | HBD     | -0.02 | 0.00  | -0.03 | 0.08  |
| 3046 | HBE1    | -0.02 | 0.00  | -0.03 | 0.13  |
| 3052 | HCCS    | -0.05 | -0.09 | -0.14 | 0.15  |
| 3054 | HCFC1   | 0.00  | 0.00  | -0.03 | 0.15  |
| 3055 | HCK     | 0.00  | 0.00  | 0.00  | NaN   |
| 3059 | HCLS1   | 0.00  | 0.00  | -0.03 | 0.03  |
| 3060 | HCRT    | -0.04 | 0.00  | 0.00  | 0.08  |
| 3061 | HCRTR1  | 0.02  | 0.09  | 0.00  | -0.05 |
| 3062 | HCRTR2  | -0.04 | 0.00  | 0.08  | -0.13 |
| 3064 | HD      | -0.02 | 0.00  | 0.00  | 0.28  |

|      |          |       |      |       |       |
|------|----------|-------|------|-------|-------|
| 3065 | HDAC1    | 0.00  | 0.00 | 0.00  | NaN   |
| 3066 | HDAC2    | 0.02  | 0.00 | 0.03  | 0.33  |
| 3067 | HDC      | -0.04 | 0.00 | -0.08 | 0.15  |
| 3068 | HDGF     | 0.04  | 0.00 | 0.11  | 0.30  |
| 3069 | HDLBP    | 0.00  | 0.00 | 0.00  | NaN   |
| 3073 | HEXA     | 0.00  | 0.00 | -0.05 | -0.01 |
| 3074 | HEXB     | 0.00  | 0.09 | -0.14 | 0.28  |
| 3077 | HFE      | 0.00  | 0.00 | 0.03  | -0.01 |
| 3082 | HGF      | 0.02  | 0.00 | 0.00  | 0.14  |
| 3083 | HGFAC    | -0.02 | 0.00 | 0.00  | -0.16 |
| 3084 | NRG1     | -0.11 | 0.09 | -0.14 | 0.08  |
| 3087 | HHEX     | -0.02 | 0.00 | -0.05 | 0.15  |
| 3091 | HIF1A    | 0.00  | 0.00 | 0.00  | 0.27  |
| 3092 | HIP1     | 0.02  | 0.00 | 0.08  | 0.01  |
| 3093 | HIP2     | -0.05 | 0.00 | -0.03 | 0.22  |
| 3094 | HINT1    | 0.00  | 0.00 | -0.03 | 0.04  |
| 3096 | HIVEP1   | 0.00  | 0.00 | 0.11  | -0.02 |
| 3098 | HK1      | 0.00  | 0.00 | 0.03  | 0.15  |
| 3099 | HK2      | 0.00  | 0.00 | 0.00  | NaN   |
| 3101 | HK3      | 0.00  | 0.00 | -0.03 | 0.06  |
| 3109 | HLA-DMB  | 0.00  | 0.00 | 0.05  | 0.07  |
| 3110 | HLXB9    | 0.02  | 0.00 | -0.03 | 0.23  |
| 3111 | HLA-DOA  | 0.00  | 0.00 | 0.05  | 0.12  |
| 3112 | HLA-DOB  | 0.00  | 0.00 | 0.05  | 0.18  |
| 3113 | HLA-DPA1 | 0.00  | 0.00 | 0.05  | 0.10  |
| 3115 | HLA-DPB1 | 0.00  | 0.00 | 0.05  | 0.02  |
| 3122 | HLA-DRA  | 0.00  | 0.00 | 0.05  | 0.12  |
| 3123 | HLA-DRB1 | -0.02 | 0.00 | 0.05  | 0.15  |
| 3127 | HLA-DRB5 | -0.02 | 0.00 | 0.05  | 0.14  |
| 3131 | HLF      | 0.11  | 0.27 | 0.03  | 0.05  |
| 3134 | HLA-F    | 0.00  | 0.00 | 0.08  | 0.18  |
| 3141 | HLCS     | 0.00  | 0.00 | 0.00  | 0.11  |
| 3145 | HMBS     | -0.05 | 0.00 | 0.00  | 0.21  |
| 3155 | HMGCL    | 0.00  | 0.00 | 0.00  | NaN   |
| 3156 | HMGCR    | 0.00  | 0.09 | -0.14 | 0.16  |
| 3157 | HMGCS1   | 0.04  | 0.09 | 0.00  | 0.26  |
| 3158 | HMGCS2   | 0.00  | 0.00 | 0.00  | -0.05 |
| 3161 | HMMR     | 0.00  | 0.00 | -0.03 | 0.05  |
| 3162 | HMOX1    | -0.02 | 0.00 | 0.03  | 0.13  |
| 3163 | HMOX2    | 0.04  | 0.00 | 0.00  | 0.15  |
| 3164 | NR4A1    | 0.02  | 0.00 | 0.00  | 0.11  |
| 3172 | HNF4A    | 0.02  | 0.09 | 0.03  | 0.02  |
| 3174 | HNF4G    | 0.09  | 0.00 | 0.08  | 0.26  |
| 3175 | ONECUT1  | -0.02 | 0.00 | -0.05 | -0.05 |
| 3176 | HNMT     | -0.02 | 0.00 | 0.00  | 0.06  |
| 3177 | SLC29A2  | 0.07  | 0.00 | 0.03  | -0.01 |
| 3178 | HNRPA1   | 0.02  | 0.00 | -0.03 | 0.27  |

|      |          |       |      |       |       |
|------|----------|-------|------|-------|-------|
| 3181 | HNRPA2B1 | 0.00  | 0.18 | 0.03  | 0.15  |
| 3182 | HNRPAB   | 0.00  | 0.00 | 0.00  | NaN   |
| 3183 | HNRPC    | -0.02 | 0.00 | 0.00  | 0.05  |
| 3184 | HNRPD    | -0.04 | 0.00 | -0.03 | 0.19  |
| 3185 | HNRPF    | 0.00  | 0.09 | -0.03 | 0.06  |
| 3187 | HNRPH1   | 0.00  | 0.00 | -0.03 | 0.15  |
| 3188 | HNRPH2   | -0.05 | 0.00 | -0.08 | 0.29  |
| 3189 | HNRPH3   | -0.02 | 0.00 | -0.03 | 0.15  |
| 3190 | HNRPK    | -0.02 | 0.00 | 0.00  | 0.03  |
| 3191 | HNRPL    | 0.02  | 0.09 | 0.05  | 0.22  |
| 3192 | HNRPU    | 0.07  | 0.00 | 0.03  | -0.03 |
| 3198 | HOXA1    | 0.00  | 0.09 | 0.03  | 0.03  |
| 3199 | HOXA2    | 0.00  | 0.18 | 0.03  | 0.22  |
| 3200 | HOXA3    | 0.00  | 0.18 | 0.03  | -0.14 |
| 3201 | HOXA4    | 0.00  | 0.18 | 0.03  | 0.01  |
| 3202 | HOXA5    | 0.00  | 0.18 | 0.00  | 0.03  |
| 3203 | HOXA6    | 0.00  | 0.27 | 0.00  | 0.02  |
| 3204 | HOXA7    | 0.00  | 0.27 | 0.00  | -0.04 |
| 3205 | HOXA9    | 0.00  | 0.18 | 0.00  | 0.18  |
| 3206 | HOXA10   | 0.00  | 0.18 | 0.00  | 0.17  |
| 3207 | HOXA11   | 0.00  | 0.18 | 0.00  | 0.29  |
| 3208 | HPCA     | 0.00  | 0.00 | 0.00  | NaN   |
| 3211 | HOXB1    | 0.02  | 0.09 | 0.00  | 0.15  |
| 3212 | HOXB2    | 0.02  | 0.09 | 0.00  | 0.11  |
| 3213 | HOXB3    | 0.02  | 0.09 | 0.00  | 0.12  |
| 3215 | HOXB5    | 0.04  | 0.09 | 0.00  | 0.13  |
| 3216 | HOXB6    | 0.05  | 0.09 | 0.00  | -0.03 |
| 3217 | HOXB7    | 0.05  | 0.09 | 0.00  | 0.19  |
| 3218 | HOXB8    | 0.05  | 0.09 | 0.00  | -0.14 |
| 3221 | HOXC4    | 0.02  | 0.00 | -0.03 | 0.07  |
| 3224 | HOXC8    | 0.02  | 0.00 | -0.03 | 0.03  |
| 3226 | HOXC10   | 0.02  | 0.00 | -0.03 | -0.13 |
| 3227 | HOXC11   | 0.02  | 0.00 | -0.03 | -0.19 |
| 3229 | HOXC13   | 0.02  | 0.00 | -0.03 | 0.01  |
| 3231 | HOXD1    | 0.02  | 0.00 | 0.00  | -0.01 |
| 3232 | HOXD3    | 0.02  | 0.00 | 0.00  | 0.03  |
| 3233 | HOXD4    | 0.02  | 0.00 | 0.00  | 0.07  |
| 3235 | HOXD9    | 0.02  | 0.00 | 0.00  | 0.05  |
| 3236 | HOXD10   | 0.02  | 0.00 | 0.00  | 0.05  |
| 3237 | HOXD11   | 0.00  | 0.18 | 0.05  | -0.05 |
| 3238 | HOXD12   | -0.04 | 0.18 | 0.05  | 0.01  |
| 3239 | HOXD13   | 0.00  | 0.00 | 0.00  | 0.17  |
| 3240 | HP       | -0.07 | 0.00 | 0.00  | 0.02  |
| 3241 | HPCAL1   | -0.02 | 0.00 | 0.00  | 0.13  |
| 3242 | HPD      | 0.02  | 0.00 | 0.00  | 0.02  |
| 3248 | HPGD     | -0.02 | 0.00 | -0.05 | 0.16  |
| 3249 | HPN      | 0.00  | 0.00 | 0.08  | 0.00  |

|      |         |       |       |       |       |
|------|---------|-------|-------|-------|-------|
| 3250 | HPR     | -0.07 | 0.00  | 0.00  | 0.09  |
| 3251 | HPRT1   | -0.04 | 0.00  | -0.08 | -0.02 |
| 3257 | HPS1    | -0.02 | 0.00  | -0.03 | 0.19  |
| 3263 | HPX     | -0.02 | 0.00  | -0.03 | 0.12  |
| 3265 | HRAS    | 0.04  | 0.00  | 0.08  | 0.06  |
| 3267 | HRB     | 0.00  | 0.00  | 0.00  | NaN   |
| 3269 | HRH1    | -0.02 | 0.00  | 0.00  | 0.09  |
| 3270 | HRC     | 0.00  | 0.00  | -0.03 | -0.10 |
| 3273 | HRG     | 0.04  | 0.00  | 0.03  | 0.02  |
| 3274 | HRH2    | 0.00  | 0.00  | -0.03 | 0.01  |
| 3281 | HSBP1   | -0.09 | 0.00  | 0.00  | 0.05  |
| 3283 | HSD3B1  | 0.00  | 0.00  | 0.00  | 0.04  |
| 3284 | HSD3B2  | 0.00  | 0.00  | 0.00  | -0.05 |
| 3290 | HSD11B1 | 0.07  | 0.00  | 0.00  | -0.03 |
| 3291 | HSD11B2 | -0.04 | 0.00  | 0.00  | -0.09 |
| 3293 | HSD17B3 | -0.02 | 0.00  | 0.00  | -0.14 |
| 3294 | HSD17B2 | -0.09 | 0.00  | 0.00  | 0.12  |
| 3295 | HSD17B4 | 0.00  | 0.00  | 0.00  | NaN   |
| 3297 | HSF1    | 0.16  | 0.00  | 0.35  | 0.34  |
| 3298 | HSF2    | -0.02 | 0.00  | 0.00  | 0.02  |
| 3299 | HSF4    | -0.04 | 0.00  | 0.00  | 0.01  |
| 3300 | DNAJB2  | 0.00  | 0.00  | 0.00  | NaN   |
| 3301 | DNAJA1  | -0.04 | 0.09  | 0.00  | -0.09 |
| 3303 | HSPA1A  | -0.04 | 0.00  | 0.05  | 0.12  |
| 3305 | HSPA1L  | 0.00  | 0.00  | 0.05  | -0.03 |
| 3306 | HSPA2   | -0.02 | 0.00  | 0.00  | -0.17 |
| 3308 | HSPA4   | 0.00  | 0.00  | -0.03 | 0.02  |
| 3309 | HSPA5   | -0.02 | 0.00  | 0.00  | 0.04  |
| 3312 | HSPA8   | -0.05 | 0.00  | -0.03 | 0.12  |
| 3315 | HSPB1   | 0.02  | 0.00  | 0.05  | 0.06  |
| 3316 | HSPB2   | -0.07 | 0.00  | 0.00  | 0.15  |
| 3321 | IGSF3   | 0.02  | 0.00  | -0.03 | 0.28  |
| 3329 | HSPD1   | 0.02  | 0.00  | 0.00  | 0.21  |
| 3336 | HSPE1   | 0.02  | 0.00  | 0.00  | 0.20  |
| 3337 | DNAJB1  | 0.02  | -0.09 | 0.00  | 0.38  |
| 3338 | DNAJC4  | 0.00  | 0.00  | 0.03  | 0.09  |
| 3339 | HSPG2   | 0.00  | 0.00  | 0.00  | NaN   |
| 3340 | NDST1   | 0.00  | 0.00  | 0.00  | NaN   |
| 3346 | HTN1    | -0.02 | 0.00  | 0.00  | 0.00  |
| 3347 | HTN3    | -0.02 | 0.00  | 0.00  | 0.06  |
| 3350 | HTR1A   | 0.00  | 0.00  | -0.11 | 0.10  |
| 3351 | HTR1B   | -0.02 | 0.00  | -0.03 | -0.08 |
| 3352 | HTR1D   | 0.02  | 0.00  | 0.00  | 0.00  |
| 3354 | HTR1E   | -0.02 | 0.00  | -0.08 | 0.03  |
| 3355 | HTR1F   | -0.05 | 0.00  | 0.03  | 0.15  |
| 3356 | HTR2A   | -0.07 | 0.00  | -0.14 | 0.00  |
| 3358 | HTR2C   | -0.05 | 0.00  | -0.05 | 0.12  |

|      |        |       |      |       |       |
|------|--------|-------|------|-------|-------|
| 3359 | HTR3A  | -0.07 | 0.00 | 0.00  | 0.11  |
| 3360 | HTR4   | 0.00  | 0.00 | 0.00  | NaN   |
| 3361 | HTR5A  | 0.02  | 0.00 | -0.03 | 0.02  |
| 3363 | HTR7   | -0.02 | 0.00 | -0.05 | 0.23  |
| 3364 | HUS1   | -0.04 | 0.00 | 0.03  | 0.23  |
| 3373 | HYAL1  | 0.00  | 0.00 | 0.00  | NaN   |
| 3376 | IARS   | -0.02 | 0.00 | 0.00  | 0.02  |
| 3381 | IBSP   | -0.04 | 0.00 | -0.03 | -0.12 |
| 3382 | ICA1   | 0.00  | 0.00 | 0.03  | 0.10  |
| 3383 | ICAM1  | 0.00  | 0.00 | 0.00  | NaN   |
| 3384 | ICAM2  | 0.15  | 0.18 | 0.03  | -0.12 |
| 3385 | ICAM3  | 0.00  | 0.00 | 0.00  | NaN   |
| 3386 | ICAM4  | 0.00  | 0.00 | 0.00  | NaN   |
| 3396 | ICT1   | 0.05  | 0.27 | 0.05  | 0.37  |
| 3397 | ID1    | 0.00  | 0.00 | 0.03  | 0.18  |
| 3398 | ID2    | -0.02 | 0.00 | 0.00  | 0.07  |
| 3399 | ID3    | 0.05  | 0.00 | 0.05  | -0.02 |
| 3400 | ID4    | 0.00  | 0.00 | 0.08  | 0.35  |
| 3416 | IDE    | -0.02 | 0.00 | -0.05 | 0.34  |
| 3417 | IDH1   | 0.00  | 0.00 | 0.00  | NaN   |
| 3418 | IDH2   | 0.02  | 0.00 | -0.03 | 0.18  |
| 3419 | IDH3A  | 0.00  | 0.00 | -0.05 | -0.01 |
| 3420 | IDH3B  | 0.02  | 0.00 | -0.03 | 0.08  |
| 3421 | IDH3G  | 0.00  | 0.00 | -0.03 | 0.17  |
| 3422 | IDI1   | 0.00  | 0.00 | 0.14  | 0.26  |
| 3423 | IDS    | -0.05 | 0.00 | -0.08 | 0.06  |
| 3425 | IDUA   | 0.02  | 0.09 | 0.03  | 0.06  |
| 3428 | IFI16  | 0.04  | 0.00 | 0.16  | 0.06  |
| 3429 | IFI27  | -0.02 | 0.00 | 0.00  | 0.04  |
| 3430 | IFI35  | -0.04 | 0.00 | 0.00  | 0.24  |
| 3431 | SP110  | -0.02 | 0.00 | 0.00  | 0.12  |
| 3434 | IFIT1  | -0.04 | 0.00 | -0.11 | 0.17  |
| 3440 | IFNA2  | -0.13 | 0.00 | -0.05 | 0.07  |
| 3445 | IFNA8  | -0.13 | 0.00 | -0.05 | -0.06 |
| 3454 | IFNAR1 | 0.00  | 0.00 | -0.03 | 0.10  |
| 3455 | IFNAR2 | 0.00  | 0.00 | -0.03 | 0.13  |
| 3456 | IFNB1  | -0.13 | 0.00 | -0.05 | -0.05 |
| 3458 | IFNG   | 0.02  | 0.00 | 0.00  | -0.02 |
| 3459 | IFNGR1 | -0.02 | 0.00 | 0.05  | 0.15  |
| 3460 | IFNGR2 | 0.00  | 0.00 | 0.00  | 0.28  |
| 3467 | IFNW1  | -0.13 | 0.00 | -0.05 | 0.03  |
| 3475 | IFRD1  | 0.00  | 0.00 | -0.03 | 0.30  |
| 3476 | IGBP1  | -0.04 | 0.00 | -0.08 | 0.27  |
| 3479 | IGF1   | 0.00  | 0.00 | 0.03  | 0.03  |
| 3480 | IGF1R  | 0.05  | 0.00 | 0.00  | 0.31  |
| 3481 | IGF2   | 0.00  | 0.00 | 0.00  | NaN   |
| 3482 | IGF2R  | -0.02 | 0.00 | -0.05 | 0.41  |



|      |         |       |      |       |       |
|------|---------|-------|------|-------|-------|
| 3483 | IGFALS  | 0.04  | 0.18 | 0.00  | 0.06  |
| 3484 | IGFBP1  | -0.04 | 0.00 | 0.03  | 0.09  |
| 3485 | IGFBP2  | 0.02  | 0.00 | 0.00  | 0.10  |
| 3486 | IGFBP3  | -0.04 | 0.00 | 0.03  | -0.06 |
| 3487 | IGFBP4  | 0.02  | 0.18 | 0.00  | 0.09  |
| 3488 | IGFBP5  | 0.02  | 0.00 | 0.00  | 0.26  |
| 3489 | IGFBP6  | 0.02  | 0.00 | -0.03 | -0.07 |
| 3490 | IGFBP7  | -0.02 | 0.00 | 0.00  | 0.11  |
| 3491 | CYR61   | -0.02 | 0.00 | -0.03 | 0.04  |
| 3508 | IGHMBP2 | 0.15  | 0.09 | 0.03  | -0.02 |
| 3543 | IGLL1   | -0.02 | 0.00 | 0.03  | -0.01 |
| 3547 | IGSF1   | -0.04 | 0.00 | -0.08 | -0.04 |
| 3550 | IK      | 0.00  | 0.00 | 0.00  | NaN   |
| 3551 | IKBKB   | 0.02  | 0.09 | 0.11  | 0.28  |
| 3552 | IL1A    | 0.00  | 0.00 | 0.00  | NaN   |
| 3553 | IL1B    | 0.00  | 0.00 | 0.00  | NaN   |
| 3554 | IL1R1   | 0.02  | 0.00 | 0.00  | -0.08 |
| 3556 | IL1RAP  | 0.02  | 0.00 | 0.00  | 0.10  |
| 3557 | IL1RN   | 0.00  | 0.00 | 0.00  | NaN   |
| 3558 | IL2     | 0.00  | 0.00 | -0.03 | 0.03  |
| 3559 | IL2RA   | 0.00  | 0.00 | 0.11  | 0.10  |
| 3560 | IL2RB   | -0.04 | 0.00 | 0.03  | 0.20  |
| 3561 | IL2RG   | -0.04 | 0.00 | -0.08 | 0.18  |
| 3562 | IL3     | 0.00  | 0.00 | -0.03 | -0.02 |
| 3565 | IL4     | 0.00  | 0.00 | -0.03 | 0.09  |
| 3566 | IL4R    | 0.02  | 0.00 | 0.00  | 0.09  |
| 3567 | IL5     | 0.00  | 0.00 | -0.03 | 0.12  |
| 3568 | IL5RA   | -0.02 | 0.00 | 0.00  | 0.04  |
| 3569 | IL6     | -0.02 | 0.09 | 0.03  | 0.05  |
| 3570 | IL6R    | 0.05  | 0.00 | 0.14  | -0.01 |
| 3572 | IL6ST   | 0.00  | 0.00 | -0.11 | 0.17  |
| 3574 | IL7     | 0.11  | 0.09 | 0.11  | 0.18  |
| 3575 | IL7R    | 0.02  | 0.27 | 0.00  | -0.15 |
| 3576 | IL8     | -0.02 | 0.00 | 0.00  | 0.04  |
| 3577 | IL8RA   | 0.02  | 0.00 | 0.00  | 0.02  |
| 3578 | IL9     | 0.00  | 0.00 | -0.03 | -0.04 |
| 3579 | IL8RB   | 0.02  | 0.00 | 0.00  | 0.09  |
| 3586 | IL10    | 0.09  | 0.00 | 0.00  | -0.15 |
| 3587 | IL10RA  | -0.05 | 0.00 | 0.00  | 0.24  |
| 3588 | IL10RB  | 0.00  | 0.00 | -0.03 | 0.10  |
| 3589 | IL11    | 0.00  | 0.09 | -0.03 | 0.09  |
| 3590 | IL11RA  | 0.00  | 0.00 | 0.00  | 0.11  |
| 3592 | IL12A   | 0.02  | 0.00 | 0.03  | 0.01  |
| 3593 | IL12B   | 0.00  | 0.00 | -0.03 | -0.07 |
| 3594 | IL12RB1 | 0.02  | 0.00 | 0.00  | 0.04  |
| 3595 | IL12RB2 | -0.02 | 0.00 | 0.00  | 0.12  |
| 3596 | IL13    | 0.00  | 0.00 | -0.03 | 0.02  |

|      |         |       |       |       |       |
|------|---------|-------|-------|-------|-------|
| 3597 | IL13RA1 | -0.05 | 0.00  | -0.08 | 0.08  |
| 3598 | IL13RA2 | -0.05 | 0.00  | -0.05 | -0.04 |
| 3600 | IL15    | 0.00  | 0.00  | 0.00  | NaN   |
| 3601 | IL15RA  | 0.00  | 0.00  | 0.11  | -0.04 |
| 3603 | IL16    | 0.00  | 0.00  | -0.03 | -0.20 |
| 3604 | TNFRSF9 | -0.02 | 0.00  | 0.00  | 0.20  |
| 3606 | IL18    | -0.07 | 0.00  | 0.00  | 0.19  |
| 3608 | ILF2    | 0.07  | 0.00  | 0.16  | 0.33  |
| 3609 | ILF3    | 0.02  | 0.00  | 0.00  | 0.26  |
| 3611 | ILK     | -0.02 | 0.00  | -0.03 | 0.05  |
| 3612 | IMPA1   | 0.13  | 0.00  | 0.14  | 0.06  |
| 3613 | IMPA2   | -0.02 | -0.09 | 0.00  | -0.02 |
| 3614 | IMPDH1  | 0.02  | 0.00  | 0.00  | 0.11  |
| 3615 | IMPDH2  | 0.00  | 0.00  | 0.00  | NaN   |
| 3617 | IMPG1   | -0.02 | 0.00  | -0.03 | -0.03 |
| 3619 | INCENP  | -0.02 | 0.00  | 0.03  | 0.13  |
| 3620 | INDO    | 0.09  | 0.18  | 0.08  | 0.15  |
| 3621 | ING1    | 0.00  | 0.00  | -0.03 | 0.29  |
| 3623 | INHA    | 0.00  | 0.00  | 0.00  | NaN   |
| 3624 | INHBA   | -0.02 | 0.00  | 0.03  | 0.01  |
| 3625 | INHBB   | 0.02  | 0.00  | 0.00  | 0.14  |
| 3628 | INPP1   | 0.00  | 0.00  | 0.00  | NaN   |
| 3631 | INPP4A  | 0.00  | 0.00  | 0.00  | NaN   |
| 3632 | INPP5A  | -0.02 | 0.00  | 0.03  | 0.06  |
| 3635 | INPP5D  | 0.00  | 0.00  | 0.00  | NaN   |
| 3636 | INPPL1  | -0.02 | 0.09  | 0.00  | 0.25  |
| 3638 | INSIG1  | 0.02  | 0.00  | -0.03 | 0.06  |
| 3640 | INSL3   | 0.02  | 0.00  | 0.00  | -0.01 |
| 3641 | INSL4   | -0.05 | 0.00  | -0.05 | 0.05  |
| 3642 | INSM1   | 0.00  | 0.00  | -0.08 | -0.04 |
| 3643 | INSR    | 0.00  | -0.09 | 0.00  | 0.13  |
| 3646 | EIF3S6  | 0.18  | 0.09  | 0.27  | 0.34  |
| 3652 | IPP     | 0.00  | 0.00  | 0.00  | NaN   |
| 3654 | IRAK1   | 0.00  | 0.00  | -0.03 | 0.38  |
| 3655 | ITGA6   | 0.00  | 0.00  | 0.00  | 0.04  |
| 3659 | IRF1    | 0.00  | 0.00  | -0.03 | 0.05  |
| 3660 | IRF2    | -0.02 | 0.00  | -0.05 | 0.02  |
| 3661 | IRF3    | 0.07  | 0.09  | -0.03 | 0.26  |
| 3662 | IRF4    | -0.04 | 0.00  | -0.03 | 0.09  |
| 3663 | IRF5    | 0.02  | 0.00  | 0.00  | 0.28  |
| 3667 | IRS1    | 0.00  | 0.00  | 0.00  | NaN   |
| 3669 | ISG20   | 0.00  | 0.00  | -0.05 | -0.02 |
| 3670 | ISL1    | 0.00  | 0.00  | -0.03 | -0.04 |
| 3671 | ISLR    | 0.00  | 0.00  | 0.08  | 0.10  |
| 3673 | ITGA2   | 0.00  | 0.00  | -0.08 | 0.05  |
| 3674 | ITGA2B  | -0.05 | 0.00  | 0.00  | 0.25  |
| 3675 | ITGA3   | 0.13  | 0.18  | 0.03  | 0.26  |

|      |         |       |       |       |       |
|------|---------|-------|-------|-------|-------|
| 3676 | ITGA4   | 0.00  | 0.00  | 0.00  | NaN   |
| 3678 | ITGA5   | 0.02  | 0.00  | -0.03 | -0.07 |
| 3679 | ITGA7   | 0.02  | 0.00  | 0.00  | 0.00  |
| 3680 | ITGA9   | 0.00  | 0.00  | 0.00  | 0.06  |
| 3682 | ITGAE   | -0.04 | 0.00  | 0.00  | 0.32  |
| 3684 | ITGAM   | 0.04  | 0.09  | 0.03  | 0.01  |
| 3685 | ITGAV   | 0.02  | 0.00  | 0.00  | 0.23  |
| 3687 | ITGAX   | 0.04  | 0.00  | 0.03  | -0.04 |
| 3688 | ITGB1   | -0.02 | 0.00  | 0.03  | 0.34  |
| 3689 | ITGB2   | 0.00  | 0.00  | 0.00  | 0.20  |
| 3690 | ITGB3   | -0.04 | 0.00  | 0.00  | 0.20  |
| 3691 | ITGB4   | 0.05  | 0.27  | 0.03  | 0.31  |
| 3692 | ITGB4BP | 0.05  | 0.00  | 0.00  | 0.57  |
| 3693 | ITGB5   | 0.00  | 0.00  | -0.03 | 0.26  |
| 3694 | ITGB6   | 0.00  | 0.00  | 0.03  | 0.12  |
| 3695 | ITGB7   | 0.02  | 0.00  | -0.03 | -0.12 |
| 3696 | ITGB8   | -0.02 | 0.00  | 0.03  | 0.04  |
| 3698 | ITIH2   | 0.00  | 0.00  | 0.14  | 0.03  |
| 3699 | ITIH3   | -0.02 | 0.00  | -0.03 | -0.09 |
| 3700 | ITIH4   | -0.02 | 0.00  | -0.03 | 0.09  |
| 3702 | ITK     | 0.00  | 0.00  | 0.00  | NaN   |
| 3704 | ITPA    | 0.02  | 0.00  | -0.03 | 0.06  |
| 3705 | ITPK1   | -0.02 | 0.00  | 0.03  | 0.17  |
| 3706 | ITPKA   | -0.02 | 0.09  | -0.14 | 0.08  |
| 3707 | ITPKB   | 0.07  | 0.00  | 0.03  | 0.04  |
| 3708 | ITPR1   | -0.02 | 0.00  | 0.00  | -0.02 |
| 3709 | ITPR2   | 0.00  | -0.09 | 0.05  | 0.05  |
| 3710 | ITPR3   | 0.00  | 0.00  | 0.05  | 0.11  |
| 3712 | IVD     | 0.00  | 0.00  | -0.14 | 0.24  |
| 3713 | IVL     | 0.07  | 0.00  | 0.16  | -0.02 |
| 3714 | JAG2    | 0.00  | 0.00  | 0.08  | 0.03  |
| 3716 | JAK1    | -0.02 | 0.00  | 0.00  | 0.07  |
| 3717 | JAK2    | -0.05 | 0.00  | -0.05 | 0.26  |
| 3718 | JAK3    | 0.02  | 0.00  | 0.00  | -0.03 |
| 3725 | JUN     | 0.00  | 0.00  | 0.03  | 0.29  |
| 3726 | JUNB    | 0.02  | -0.09 | 0.00  | 0.20  |
| 3727 | JUND    | 0.00  | 0.00  | 0.00  | 0.19  |
| 3728 | JUP     | 0.02  | 0.18  | 0.00  | 0.22  |
| 3730 | KAL1    | -0.05 | -0.09 | -0.14 | 0.05  |
| 3735 | KARS    | -0.09 | 0.00  | 0.03  | 0.33  |
| 3736 | KCNA1   | -0.02 | 0.09  | 0.05  | -0.03 |
| 3737 | KCNA2   | 0.00  | 0.00  | -0.03 | 0.11  |
| 3738 | KCNA3   | 0.00  | 0.00  | -0.03 | -0.05 |
| 3739 | KCNA4   | 0.02  | 0.00  | 0.03  | -0.06 |
| 3741 | KCNA5   | -0.02 | 0.09  | 0.05  | -0.06 |
| 3742 | KCNA6   | -0.02 | 0.09  | 0.08  | 0.04  |
| 3744 | KCNA10  | 0.00  | 0.00  | -0.03 | 0.02  |

|      |         |       |       |       |       |
|------|---------|-------|-------|-------|-------|
| 3745 | KCNB1   | 0.05  | 0.00  | 0.05  | 0.00  |
| 3746 | KCNC1   | 0.00  | 0.00  | -0.05 | 0.06  |
| 3748 | KCNC3   | 0.00  | 0.00  | -0.03 | -0.20 |
| 3749 | KCNC4   | 0.00  | 0.00  | -0.03 | 0.09  |
| 3750 | KCND1   | -0.04 | 0.00  | -0.05 | 0.03  |
| 3751 | KCND2   | 0.00  | 0.00  | -0.03 | 0.01  |
| 3752 | KCND3   | 0.02  | 0.00  | -0.03 | 0.01  |
| 3753 | KCNE1   | 0.00  | 0.00  | 0.00  | 0.13  |
| 3755 | KCNG1   | 0.07  | 0.09  | 0.05  | -0.05 |
| 3756 | KCNH1   | 0.07  | 0.00  | 0.00  | -0.03 |
| 3757 | KCNH2   | 0.02  | 0.09  | 0.00  | 0.17  |
| 3758 | KCNJ1   | -0.05 | 0.00  | -0.03 | 0.01  |
| 3759 | KCNJ2   | 0.02  | 0.09  | 0.03  | -0.01 |
| 3760 | KCNJ3   | -0.02 | 0.00  | 0.03  | 0.03  |
| 3761 | KCNJ4   | -0.04 | 0.00  | -0.03 | 0.13  |
| 3762 | KCNJ5   | -0.05 | 0.00  | -0.03 | 0.20  |
| 3763 | KCNJ6   | 0.00  | 0.00  | 0.00  | -0.06 |
| 3764 | KCNJ8   | 0.00  | -0.09 | 0.05  | 0.01  |
| 3765 | KCNJ9   | 0.05  | 0.00  | 0.14  | 0.01  |
| 3766 | KCNJ10  | 0.07  | 0.00  | 0.14  | 0.00  |
| 3768 | KCNJ12  | -0.04 | 0.18  | 0.03  | 0.25  |
| 3770 | KCNJ14  | 0.00  | 0.00  | -0.03 | -0.22 |
| 3772 | KCNJ15  | 0.00  | 0.00  | 0.00  | 0.07  |
| 3773 | KCNJ16  | 0.02  | 0.18  | 0.03  | 0.10  |
| 3775 | KCNK1   | 0.11  | 0.00  | 0.03  | 0.24  |
| 3776 | KCNK2   | 0.09  | 0.00  | 0.00  | -0.11 |
| 3777 | KCNK3   | -0.02 | 0.00  | 0.00  | 0.11  |
| 3778 | KCNMA1  | -0.02 | 0.00  | 0.03  | 0.05  |
| 3780 | KCNN1   | 0.02  | 0.00  | 0.00  | 0.07  |
| 3781 | KCNN2   | 0.00  | 0.00  | -0.05 | 0.13  |
| 3782 | KCNN3   | 0.11  | 0.00  | 0.14  | -0.06 |
| 3783 | KCNN4   | -0.02 | 0.00  | -0.03 | 0.07  |
| 3784 | KCNQ1   | 0.00  | 0.00  | 0.00  | NaN   |
| 3785 | KCNQ2   | 0.04  | 0.09  | 0.08  | 0.14  |
| 3786 | KCNQ3   | 0.20  | 0.09  | 0.38  | 0.03  |
| 3787 | KCNS1   | 0.02  | 0.09  | 0.03  | 0.02  |
| 3790 | KCNS3   | -0.02 | 0.00  | 0.00  | -0.08 |
| 3791 | KDR     | -0.02 | 0.00  | 0.00  | 0.02  |
| 3792 | KEL     | 0.02  | 0.00  | 0.00  | -0.05 |
| 3795 | KHK     | 0.00  | 0.00  | 0.00  | NaN   |
| 3797 | KIF3C   | -0.02 | 0.00  | 0.00  | -0.03 |
| 3798 | KIF5A   | 0.02  | 0.00  | 0.00  | -0.28 |
| 3799 | KIF5B   | -0.02 | 0.00  | 0.03  | 0.35  |
| 3800 | KIF5C   | -0.02 | 0.00  | 0.00  | 0.18  |
| 3801 | KIFC3   | -0.05 | 0.00  | 0.03  | 0.17  |
| 3812 | KIR3DL2 | 0.00  | 0.09  | -0.03 | 0.05  |
| 3814 | KISS1   | 0.07  | 0.00  | 0.05  | -0.13 |

|      |       |       |       |       |       |
|------|-------|-------|-------|-------|-------|
| 3815 | KIT   | -0.02 | 0.00  | 0.00  | 0.05  |
| 3817 | KLK2  | 0.00  | 0.00  | -0.03 | 0.13  |
| 3818 | KLKB1 | -0.02 | 0.00  | -0.08 | 0.00  |
| 3820 | KLRB1 | 0.00  | -0.18 | 0.05  | 0.07  |
| 3823 | KLRC3 | 0.00  | -0.18 | 0.08  | 0.09  |
| 3824 | KLRD1 | 0.00  | -0.18 | 0.08  | 0.22  |
| 3831 | KNS2  | 0.00  | 0.00  | 0.03  | -0.03 |
| 3836 | KPNA1 | 0.00  | 0.00  | -0.03 | 0.35  |
| 3837 | KPNB1 | 0.00  | 0.18  | 0.00  | 0.19  |
| 3839 | KPNA3 | -0.07 | 0.00  | -0.11 | 0.36  |
| 3840 | KPNA4 | 0.02  | 0.00  | 0.03  | 0.12  |
| 3841 | KPNA5 | -0.02 | 0.00  | 0.00  | 0.01  |
| 3848 | KRT1  | 0.02  | 0.00  | -0.03 | -0.07 |
| 3851 | KRT4  | 0.02  | 0.00  | -0.03 | 0.01  |
| 3852 | KRT5  | 0.02  | 0.00  | -0.03 | -0.06 |
| 3853 | KRT6A | 0.02  | 0.00  | -0.03 | -0.02 |
| 3854 | KRT6B | 0.02  | 0.00  | 0.00  | 0.00  |
| 3855 | KRT7  | 0.02  | 0.00  | 0.00  | 0.17  |
| 3856 | KRT8  | 0.02  | 0.00  | -0.03 | 0.19  |
| 3857 | KRT9  | 0.02  | 0.18  | 0.00  | -0.05 |
| 3858 | KRT10 | 0.00  | 0.09  | 0.00  | 0.33  |
| 3859 | KRT12 | 0.00  | 0.09  | 0.00  | 0.03  |
| 3860 | KRT13 | 0.02  | 0.18  | 0.00  | -0.12 |
| 3866 | KRT15 | 0.02  | 0.18  | 0.00  | 0.06  |
| 3875 | KRT18 | 0.02  | 0.00  | -0.03 | 0.25  |
| 3880 | KRT19 | 0.02  | 0.18  | 0.00  | 0.13  |
| 3895 | KTN1  | 0.00  | 0.00  | 0.00  | 0.15  |
| 3897 | L1CAM | 0.00  | 0.00  | -0.03 | -0.04 |
| 3898 | LAD1  | 0.07  | 0.00  | 0.05  | 0.27  |
| 3902 | LAG3  | -0.02 | 0.09  | 0.05  | -0.12 |
| 3903 | LAIR1 | 0.00  | 0.09  | -0.03 | -0.05 |
| 3904 | LAIR2 | 0.00  | 0.09  | -0.03 | -0.17 |
| 3906 | LALBA | 0.00  | 0.00  | 0.00  | NaN   |
| 3908 | LAMA2 | -0.02 | 0.00  | 0.05  | -0.09 |
| 3909 | LAMA3 | 0.00  | -0.09 | 0.03  | 0.07  |
| 3910 | LAMA4 | 0.02  | 0.00  | 0.03  | 0.03  |
| 3911 | LAMA5 | 0.05  | 0.09  | 0.08  | 0.40  |
| 3912 | LAMB1 | 0.02  | 0.00  | -0.03 | -0.02 |
| 3913 | LAMB2 | 0.00  | 0.00  | 0.00  | NaN   |
| 3914 | LAMB3 | 0.07  | 0.00  | 0.00  | 0.22  |
| 3915 | LAMC1 | 0.07  | 0.00  | 0.03  | 0.12  |
| 3916 | LAMP1 | 0.00  | 0.00  | 0.00  | -0.15 |
| 3918 | LAMC2 | 0.07  | 0.00  | 0.03  | 0.06  |
| 3920 | LAMP2 | -0.05 | 0.00  | -0.08 | 0.18  |
| 3925 | STMN1 | 0.00  | 0.00  | 0.00  | NaN   |
| 3927 | LASP1 | 0.00  | 0.45  | 0.05  | 0.58  |
| 3929 | LBP   | 0.02  | 0.00  | 0.03  | -0.07 |

|      |          |       |       |       |       |
|------|----------|-------|-------|-------|-------|
| 3930 | LBR      | 0.07  | 0.00  | 0.03  | -0.21 |
| 3931 | LCAT     | -0.04 | 0.00  | 0.00  | 0.12  |
| 3932 | LCK      | 0.00  | 0.00  | 0.00  | NaN   |
| 3933 | LCN1     | 0.02  | 0.00  | 0.03  | 0.04  |
| 3934 | LCN2     | 0.02  | 0.00  | 0.00  | -0.02 |
| 3937 | LCP2     | 0.00  | 0.00  | -0.03 | 0.10  |
| 3938 | LCT      | -0.02 | 0.00  | 0.00  | 0.28  |
| 3939 | LDHA     | 0.00  | 0.00  | -0.05 | -0.05 |
| 3945 | LDHB     | 0.00  | -0.09 | 0.05  | 0.21  |
| 3948 | LDHC     | 0.00  | 0.00  | -0.05 | -0.05 |
| 3949 | LDLR     | 0.02  | 0.00  | 0.00  | 0.16  |
| 3950 | LECT2    | 0.00  | 0.00  | -0.03 | 0.08  |
| 3952 | LEP      | 0.02  | 0.00  | 0.00  | 0.04  |
| 3953 | LEPR     | -0.02 | 0.00  | 0.00  | 0.11  |
| 3954 | LETM1    | -0.02 | 0.00  | 0.00  | 0.23  |
| 3956 | LGALS1   | -0.04 | 0.00  | 0.03  | -0.32 |
| 3957 | LGALS2   | -0.04 | 0.00  | 0.03  | 0.09  |
| 3958 | LGALS3   | 0.00  | 0.00  | 0.00  | 0.17  |
| 3959 | LGALS3BP | 0.02  | 0.18  | 0.03  | 0.32  |
| 3960 | LGALS4   | 0.02  | 0.09  | 0.05  | 0.03  |
| 3964 | LGALS8   | 0.09  | 0.00  | 0.03  | 0.30  |
| 3973 | LHCGR    | 0.02  | 0.00  | 0.00  | -0.08 |
| 3975 | LHX1     | 0.00  | 0.09  | 0.03  | 0.03  |
| 3976 | LIF      | 0.00  | 0.00  | 0.03  | 0.12  |
| 3977 | LIFR     | 0.04  | 0.09  | 0.00  | 0.13  |
| 3978 | LIG1     | 0.00  | 0.00  | -0.03 | 0.22  |
| 3980 | LIG3     | -0.02 | 0.09  | 0.03  | 0.15  |
| 3981 | LIG4     | -0.02 | 0.00  | -0.05 | 0.13  |
| 3982 | LIM2     | 0.00  | 0.00  | -0.03 | -0.13 |
| 3984 | LIMK1    | 0.02  | 0.00  | 0.05  | 0.04  |
| 3985 | LIMK2    | 0.00  | 0.00  | 0.05  | 0.34  |
| 3987 | LIMS1    | 0.00  | 0.00  | 0.00  | NaN   |
| 3988 | LIPA     | -0.04 | 0.00  | -0.11 | 0.26  |
| 3990 | LIPC     | -0.02 | 0.00  | -0.05 | -0.04 |
| 3991 | LIPE     | 0.02  | 0.00  | -0.03 | 0.14  |
| 3992 | FADS1    | -0.02 | 0.00  | 0.05  | 0.16  |
| 3993 | LLGL2    | 0.05  | 0.27  | 0.03  | 0.50  |
| 3995 | FADS3    | -0.04 | 0.00  | 0.03  | 0.14  |
| 3996 | LLGL1    | -0.05 | 0.00  | 0.00  | -0.02 |
| 3998 | LMAN1    | -0.02 | -0.09 | -0.03 | 0.15  |
| 4000 | LMNA     | 0.09  | 0.00  | 0.14  | 0.27  |
| 4001 | LMNB1    | 0.00  | 0.00  | -0.05 | -0.09 |
| 4004 | LMO1     | 0.00  | 0.00  | -0.08 | -0.02 |
| 4005 | LMO2     | 0.04  | 0.00  | -0.05 | 0.03  |
| 4008 | LMO7     | -0.05 | -0.09 | -0.14 | 0.00  |
| 4010 | LMX1B    | -0.02 | 0.00  | 0.03  | 0.22  |
| 4012 | LNPEP    | 0.00  | 0.00  | -0.14 | 0.00  |

|      |           |       |       |       |       |
|------|-----------|-------|-------|-------|-------|
| 4013 | LOH11CR2A | -0.05 | 0.00  | -0.03 | 0.09  |
| 4014 | LOR       | 0.05  | 0.00  | 0.16  | -0.17 |
| 4015 | LOX       | 0.00  | 0.00  | -0.03 | 0.12  |
| 4016 | LOXL1     | 0.00  | 0.00  | 0.00  | NaN   |
| 4017 | LOXL2     | -0.13 | -0.18 | -0.22 | -0.04 |
| 4018 | LPA       | -0.02 | 0.00  | -0.05 | -0.18 |
| 4023 | LPL       | -0.15 | -0.18 | -0.22 | 0.08  |
| 4025 | LPO       | 0.16  | 0.00  | 0.03  | 0.18  |
| 4026 | LPP       | 0.04  | 0.00  | 0.00  | 0.13  |
| 4033 | LRMP      | 0.00  | -0.09 | 0.08  | 0.14  |
| 4034 | LRRN1     | -0.02 | 0.00  | 0.00  | 0.11  |
| 4035 | LRP1      | 0.02  | 0.09  | -0.03 | -0.07 |
| 4036 | LRP2      | 0.00  | 0.00  | 0.03  | -0.07 |
| 4037 | LRP3      | 0.00  | 0.00  | 0.05  | -0.12 |
| 4038 | LRP4      | 0.00  | 0.00  | -0.03 | -0.02 |
| 4040 | LRP6      | 0.00  | -0.09 | 0.05  | 0.18  |
| 4041 | LRP5      | 0.07  | 0.09  | 0.03  | 0.21  |
| 4043 | LRPAP1    | 0.00  | 0.00  | 0.00  | -0.04 |
| 4045 | LSAMP     | 0.00  | 0.00  | -0.03 | -0.07 |
| 4046 | LSP1      | 0.00  | 0.00  | 0.00  | NaN   |
| 4047 | LSS       | 0.00  | 0.09  | 0.00  | 0.30  |
| 4048 | LTA4H     | 0.00  | 0.09  | 0.00  | 0.16  |
| 4049 | LTA       | 0.00  | 0.00  | 0.05  | -0.03 |
| 4050 | LTB       | 0.00  | 0.00  | 0.05  | -0.06 |
| 4051 | CYP4F3    | 0.00  | 0.00  | 0.00  | NaN   |
| 4052 | LTBP1     | 0.00  | 0.00  | 0.00  | NaN   |
| 4053 | LTBP2     | -0.02 | 0.00  | 0.00  | -0.07 |
| 4054 | LTBP3     | 0.05  | 0.09  | 0.14  | 0.08  |
| 4055 | LTBR      | -0.02 | 0.09  | 0.05  | 0.36  |
| 4056 | LTC4S     | 0.02  | 0.00  | -0.03 | 0.03  |
| 4057 | LTF       | -0.04 | 0.00  | 0.00  | -0.04 |
| 4058 | LTK       | -0.02 | 0.09  | -0.14 | 0.05  |
| 4060 | LUM       | 0.00  | 0.09  | 0.00  | 0.00  |
| 4061 | LY6E      | 0.16  | 0.00  | 0.35  | 0.26  |
| 4062 | LY6H      | 0.16  | 0.00  | 0.35  | -0.03 |
| 4063 | LY9       | 0.07  | 0.00  | 0.14  | -0.10 |
| 4065 | LY75      | -0.02 | 0.00  | 0.03  | 0.27  |
| 4066 | LYL1      | 0.00  | -0.09 | 0.00  | 0.13  |
| 4067 | LYN       | 0.11  | 0.00  | 0.14  | 0.03  |
| 4068 | SH2D1A    | -0.05 | 0.00  | -0.08 | 0.17  |
| 4070 | TACSTD2   | 0.00  | 0.00  | 0.00  | 0.16  |
| 4071 | TM4SF1    | 0.04  | 0.00  | 0.03  | 0.28  |
| 4072 | TACSTD1   | 0.02  | 0.00  | 0.00  | 0.08  |
| 4074 | M6PR      | 0.00  | -0.18 | 0.05  | 0.18  |
| 4082 | MARCKS    | 0.02  | 0.00  | 0.03  | 0.24  |
| 4085 | MAD2L1    | 0.00  | 0.00  | -0.03 | -0.04 |
| 4094 | MAF       | -0.09 | 0.00  | 0.00  | 0.16  |

|      |         |       |       |       |       |
|------|---------|-------|-------|-------|-------|
| 4099 | MAG     | 0.02  | 0.00  | 0.05  | 0.19  |
| 4100 | MAGEA1  | 0.00  | 0.00  | -0.03 | 0.01  |
| 4103 | MAGEA4  | -0.02 | 0.00  | -0.11 | -0.25 |
| 4107 | MAGEA8  | -0.05 | 0.00  | -0.08 | -0.24 |
| 4109 | MAGEA10 | -0.02 | 0.00  | -0.11 | 0.15  |
| 4112 | MAGEB1  | -0.07 | 0.00  | -0.11 | 0.04  |
| 4113 | MAGEB2  | -0.07 | 0.00  | -0.11 | 0.15  |
| 4114 | MAGEB3  | -0.07 | 0.00  | -0.11 | -0.08 |
| 4115 | MAGEB4  | -0.07 | 0.00  | -0.11 | 0.04  |
| 4117 | MAK     | -0.02 | 0.00  | 0.11  | 0.12  |
| 4118 | MAL     | 0.00  | 0.00  | 0.00  | NaN   |
| 4121 | MAN1A1  | -0.04 | 0.00  | 0.03  | -0.01 |
| 4122 | MAN2A2  | 0.02  | 0.00  | 0.03  | 0.18  |
| 4123 | MAN2C1  | 0.00  | 0.00  | 0.00  | NaN   |
| 4124 | MAN2A1  | 0.00  | 0.00  | -0.08 | 0.20  |
| 4125 | MAN2B1  | 0.02  | -0.09 | 0.00  | 0.10  |
| 4126 | MANBA   | -0.04 | 0.00  | 0.00  | 0.14  |
| 4128 | MAOA    | -0.05 | 0.00  | -0.11 | 0.16  |
| 4129 | MAOB    | -0.05 | 0.00  | -0.11 | -0.04 |
| 4130 | MAP1A   | -0.04 | 0.00  | -0.14 | 0.01  |
| 4131 | MAP1B   | 0.00  | 0.00  | -0.11 | -0.17 |
| 4133 | MAP2    | 0.00  | 0.00  | 0.00  | NaN   |
| 4134 | MAP4    | -0.04 | 0.00  | 0.00  | 0.05  |
| 4137 | MAPT    | -0.04 | 0.00  | 0.00  | -0.08 |
| 4139 | MARK1   | 0.07  | 0.00  | 0.00  | 0.02  |
| 4140 | MARK3   | 0.00  | 0.00  | 0.00  | NaN   |
| 4141 | MARS    | 0.02  | 0.00  | 0.00  | 0.40  |
| 4142 | MAS1    | -0.02 | 0.00  | -0.05 | -0.22 |
| 4143 | MAT1A   | 0.00  | 0.00  | 0.00  | -0.10 |
| 4144 | MAT2A   | 0.00  | 0.00  | 0.00  | NaN   |
| 4145 | MATK    | 0.00  | 0.00  | 0.00  | NaN   |
| 4146 | MATN1   | -0.02 | 0.09  | 0.00  | 0.03  |
| 4147 | MATN2   | 0.16  | 0.18  | 0.27  | 0.19  |
| 4148 | MATN3   | -0.02 | 0.00  | 0.00  | -0.03 |
| 4149 | MAX     | -0.02 | 0.00  | 0.00  | 0.17  |
| 4151 | MB      | -0.02 | 0.00  | 0.03  | 0.10  |
| 4152 | MBD1    | -0.02 | -0.09 | -0.05 | 0.06  |
| 4153 | MBL2    | -0.04 | 0.00  | -0.03 | -0.02 |
| 4155 | MBP     | -0.02 | -0.09 | 0.00  | 0.09  |
| 4157 | MC1R    | -0.05 | 0.00  | 0.00  | -0.02 |
| 4158 | MC2R    | -0.02 | -0.09 | 0.00  | 0.10  |
| 4159 | MC3R    | 0.02  | 0.00  | 0.05  | -0.09 |
| 4160 | MC4R    | -0.02 | -0.09 | 0.03  | 0.08  |
| 4161 | MC5R    | -0.02 | -0.09 | 0.00  | 0.02  |
| 4162 | MCAM    | -0.05 | 0.00  | 0.00  | 0.28  |
| 4163 | MCC     | 0.00  | 0.00  | -0.05 | 0.11  |
| 4166 | CHST6   | -0.09 | 0.00  | 0.03  | 0.22  |



|      |         |       |       |       |       |
|------|---------|-------|-------|-------|-------|
| 4168 | MCF2    | -0.04 | 0.09  | -0.11 | -0.04 |
| 4170 | MCL1    | 0.07  | 0.09  | 0.14  | 0.18  |
| 4171 | MCM2    | 0.00  | 0.00  | -0.03 | -0.01 |
| 4172 | MCM3    | -0.02 | 0.00  | 0.08  | 0.34  |
| 4173 | MCM4    | 0.13  | 0.00  | 0.16  | 0.25  |
| 4174 | MCM5    | -0.02 | 0.00  | 0.03  | 0.01  |
| 4175 | MCM6    | -0.02 | 0.00  | 0.00  | 0.03  |
| 4176 | MCM7    | 0.02  | 0.00  | 0.00  | 0.23  |
| 4185 | ADAM11  | -0.05 | 0.00  | 0.00  | 0.01  |
| 4188 | MDFI    | 0.00  | 0.09  | 0.11  | 0.00  |
| 4189 | DNAJB9  | 0.02  | 0.00  | -0.03 | 0.00  |
| 4190 | MDH1    | 0.02  | 0.00  | 0.00  | 0.14  |
| 4191 | MDH2    | 0.02  | 0.00  | 0.08  | 0.32  |
| 4192 | MDK     | -0.02 | 0.00  | -0.03 | 0.10  |
| 4193 | MDM2    | 0.04  | 0.09  | 0.00  | 0.13  |
| 4194 | MDM4    | 0.09  | 0.00  | 0.05  | 0.24  |
| 4197 | MDS1    | 0.02  | 0.00  | 0.03  | 0.30  |
| 4199 | ME1     | -0.02 | 0.00  | -0.05 | 0.12  |
| 4200 | ME2     | -0.02 | -0.09 | -0.05 | 0.15  |
| 4204 | MECP2   | 0.00  | 0.00  | -0.03 | 0.11  |
| 4205 | MEF2A   | -0.02 | 0.00  | 0.00  | 0.01  |
| 4207 | MEF2B   | 0.02  | 0.00  | 0.00  | 0.21  |
| 4208 | MEF2C   | 0.00  | 0.00  | -0.14 | -0.13 |
| 4209 | MEF2D   | 0.04  | 0.00  | 0.11  | 0.03  |
| 4210 | MEFV    | 0.04  | 0.00  | 0.00  | -0.12 |
| 4211 | MEIS1   | 0.02  | 0.00  | 0.00  | 0.14  |
| 4212 | MEIS2   | -0.02 | 0.00  | -0.19 | 0.11  |
| 4215 | MAP3K3  | 0.16  | 0.18  | 0.03  | 0.48  |
| 4216 | MAP3K4  | -0.02 | 0.00  | -0.05 | 0.23  |
| 4217 | MAP3K5  | -0.02 | 0.00  | 0.08  | 0.40  |
| 4221 | MEN1    | 0.00  | -0.09 | 0.03  | 0.39  |
| 4222 | MEOX1   | -0.04 | 0.00  | 0.00  | 0.33  |
| 4223 | MEOX2   | -0.02 | 0.00  | 0.00  | -0.02 |
| 4224 | MEP1A   | 0.00  | 0.00  | 0.05  | 0.18  |
| 4225 | MEP1B   | 0.02  | -0.09 | 0.00  | -0.12 |
| 4232 | MEST    | 0.02  | 0.00  | 0.00  | 0.10  |
| 4233 | MET     | 0.00  | 0.00  | -0.03 | 0.01  |
| 4234 | METTL1  | 0.02  | 0.09  | 0.00  | 0.02  |
| 4236 | MFAP1   | -0.04 | 0.00  | -0.14 | 0.35  |
| 4237 | MFAP2   | 0.00  | 0.00  | 0.00  | NaN   |
| 4238 | MFAP3   | 0.00  | 0.00  | 0.00  | NaN   |
| 4239 | MFAP4   | -0.04 | 0.09  | 0.03  | 0.14  |
| 4240 | MFGE8   | 0.00  | 0.00  | -0.05 | -0.03 |
| 4241 | MFI2    | 0.02  | 0.09  | -0.03 | -0.09 |
| 4242 | MFNG    | -0.04 | 0.00  | 0.03  | 0.22  |
| 4245 | MGAT1   | 0.00  | 0.00  | -0.03 | 0.02  |
| 4246 | SCGB2A1 | -0.02 | 0.00  | 0.03  | -0.01 |

|      |         |       |       |       |       |
|------|---------|-------|-------|-------|-------|
| 4247 | MGAT2   | 0.02  | 0.00  | 0.00  | 0.17  |
| 4248 | MGAT3   | -0.04 | 0.00  | -0.03 | -0.12 |
| 4249 | MGAT5   | -0.02 | 0.00  | 0.00  | -0.05 |
| 4250 | SCGB2A2 | -0.02 | 0.00  | 0.03  | -0.12 |
| 4254 | KITLG   | 0.00  | 0.00  | 0.03  | 0.03  |
| 4255 | MGMT    | -0.04 | 0.00  | 0.00  | 0.06  |
| 4256 | MGP     | 0.00  | -0.09 | 0.05  | 0.02  |
| 4258 | MGST2   | -0.02 | 0.00  | 0.00  | -0.02 |
| 4259 | MGST3   | 0.04  | 0.00  | 0.08  | 0.27  |
| 4277 | MICB    | 0.00  | 0.00  | 0.05  | 0.00  |
| 4281 | MID1    | -0.05 | -0.09 | -0.14 | 0.04  |
| 4284 | MIP     | 0.00  | 0.00  | 0.00  | NaN   |
| 4285 | MIPEP   | -0.07 | 0.00  | -0.11 | 0.14  |
| 4286 | MITF    | -0.05 | 0.00  | 0.00  | 0.03  |
| 4288 | MKI67   | -0.04 | 0.00  | 0.00  | 0.11  |
| 4289 | MKLN1   | 0.02  | 0.00  | 0.00  | -0.22 |
| 4291 | MLF1    | 0.02  | 0.00  | 0.03  | 0.25  |
| 4292 | MLH1    | 0.02  | 0.00  | 0.00  | 0.33  |
| 4294 | MAP3K10 | 0.00  | 0.00  | 0.05  | 0.11  |
| 4295 | MLN     | 0.00  | 0.00  | 0.05  | -0.08 |
| 4296 | MAP3K11 | 0.02  | 0.00  | 0.05  | -0.01 |
| 4297 | MLL     | -0.05 | 0.00  | 0.00  | 0.31  |
| 4298 | MLLT1   | 0.00  | -0.09 | 0.00  | 0.09  |
| 4300 | MLLT3   | -0.07 | 0.00  | -0.03 | 0.34  |
| 4301 | MLLT4   | -0.02 | 0.00  | -0.03 | 0.19  |
| 4303 | MLLT7   | -0.04 | 0.00  | -0.08 | -0.08 |
| 4306 | NR3C2   | -0.02 | 0.00  | -0.03 | 0.18  |
| 4308 | TRPM1   | -0.04 | 0.00  | -0.14 | 0.07  |
| 4311 | MME     | 0.02  | 0.00  | 0.03  | -0.05 |
| 4312 | MMP1    | -0.07 | -0.09 | 0.00  | -0.07 |
| 4313 | MMP2    | -0.07 | 0.00  | 0.00  | 0.13  |
| 4314 | MMP3    | -0.07 | -0.09 | 0.00  | 0.06  |
| 4316 | MMP7    | -0.07 | -0.09 | 0.00  | 0.15  |
| 4317 | MMP8    | -0.07 | -0.09 | 0.00  | 0.08  |
| 4318 | MMP9    | 0.02  | 0.00  | 0.03  | 0.03  |
| 4319 | MMP10   | -0.07 | -0.09 | 0.00  | -0.09 |
| 4320 | MMP11   | -0.02 | 0.00  | 0.03  | 0.10  |
| 4321 | MMP12   | -0.07 | -0.09 | 0.00  | 0.03  |
| 4322 | MMP13   | -0.07 | -0.09 | 0.00  | -0.02 |
| 4323 | MMP14   | -0.02 | 0.00  | 0.00  | 0.14  |
| 4324 | MMP15   | -0.05 | 0.00  | 0.00  | 0.15  |
| 4325 | MMP16   | 0.15  | 0.00  | 0.16  | 0.27  |
| 4326 | MMP17   | 0.00  | -0.09 | 0.00  | -0.05 |
| 4327 | MMP19   | 0.04  | 0.00  | 0.00  | 0.04  |
| 4329 | ALDH6A1 | -0.02 | 0.00  | 0.00  | 0.22  |
| 4330 | MN1     | -0.02 | -0.09 | 0.03  | 0.19  |
| 4331 | MNAT1   | 0.00  | 0.00  | 0.00  | 0.09  |

|      |        |       |       |       |       |
|------|--------|-------|-------|-------|-------|
| 4332 | MNDA   | 0.02  | 0.00  | 0.16  | -0.08 |
| 4335 | MNT    | -0.05 | 0.00  | 0.00  | 0.12  |
| 4336 | MOBP   | -0.04 | 0.00  | 0.00  | 0.04  |
| 4338 | MOCS2  | 0.00  | 0.00  | -0.08 | 0.15  |
| 4340 | MOG    | 0.00  | 0.00  | 0.08  | -0.02 |
| 4342 | MOS    | 0.11  | 0.00  | 0.14  | 0.07  |
| 4350 | MPG    | 0.05  | 0.09  | 0.00  | 0.23  |
| 4351 | MPI    | 0.00  | 0.00  | 0.00  | NaN   |
| 4352 | MPL    | 0.02  | 0.00  | 0.00  | 0.05  |
| 4353 | MPO    | 0.16  | 0.00  | 0.03  | 0.09  |
| 4354 | MPP1   | -0.04 | 0.00  | -0.11 | 0.20  |
| 4355 | MPP2   | -0.04 | 0.09  | 0.00  | 0.15  |
| 4356 | MPP3   | -0.04 | 0.00  | 0.00  | 0.14  |
| 4357 | MPST   | -0.04 | 0.00  | 0.03  | 0.16  |
| 4358 | MPV17  | 0.00  | 0.00  | 0.00  | NaN   |
| 4359 | MPZ    | 0.11  | 0.00  | 0.14  | 0.09  |
| 4360 | MRC1   | 0.00  | 0.00  | 0.08  | -0.09 |
| 4361 | MRE11A | -0.07 | 0.09  | -0.03 | 0.10  |
| 4363 | ABCC1  | 0.02  | 0.00  | 0.00  | 0.16  |
| 4435 | CITED1 | -0.04 | 0.00  | -0.08 | 0.01  |
| 4436 | MSH2   | 0.02  | 0.00  | 0.00  | 0.15  |
| 4437 | MSH3   | 0.00  | 0.00  | -0.14 | 0.14  |
| 4438 | MSH4   | -0.02 | 0.00  | -0.03 | -0.03 |
| 4439 | MSH5   | 0.00  | 0.00  | 0.05  | 0.26  |
| 4440 | MSI1   | 0.02  | 0.00  | 0.00  | 0.05  |
| 4477 | MSMB   | -0.02 | 0.00  | 0.00  | -0.17 |
| 4478 | MSN    | -0.04 | 0.00  | -0.05 | 0.18  |
| 4481 | MSR1   | -0.18 | -0.18 | -0.22 | 0.16  |
| 4482 | MSRA   | -0.11 | -0.09 | -0.14 | 0.15  |
| 4486 | MST1R  | 0.00  | 0.00  | 0.00  | NaN   |
| 4487 | MSX1   | -0.02 | 0.00  | 0.00  | -0.06 |
| 4488 | MSX2   | 0.00  | 0.00  | -0.03 | 0.15  |
| 4495 | MT1G   | -0.05 | 0.00  | 0.00  | 0.15  |
| 4496 | MT1H   | -0.05 | 0.00  | 0.00  | 0.14  |
| 4501 | MT1X   | -0.05 | 0.00  | 0.00  | 0.18  |
| 4502 | MT2A   | -0.05 | 0.00  | 0.00  | 0.23  |
| 4504 | MT3    | -0.05 | 0.00  | 0.00  | 0.06  |
| 4507 | MTAP   | -0.13 | -0.09 | -0.05 | 0.42  |
| 4515 | MTCP1  | -0.05 | 0.00  | -0.11 | 0.15  |
| 4520 | MTF1   | 0.00  | 0.00  | 0.00  | NaN   |
| 4521 | NUDT1  | 0.00  | 0.00  | 0.05  | 0.18  |
| 4522 | MTHFD1 | -0.02 | 0.00  | 0.00  | 0.05  |
| 4524 | MTHFR  | -0.02 | 0.00  | 0.00  | -0.14 |
| 4528 | MTIF2  | 0.00  | 0.00  | 0.00  | NaN   |
| 4534 | MTM1   | -0.04 | 0.00  | -0.11 | 0.08  |
| 4542 | MYO1F  | 0.02  | -0.09 | 0.03  | 0.13  |
| 4544 | MTNR1B | -0.09 | 0.09  | -0.03 | -0.05 |

|      |         |       |      |       |       |
|------|---------|-------|------|-------|-------|
| 4548 | MTR     | 0.09  | 0.00 | 0.03  | 0.14  |
| 4552 | MTRR    | 0.02  | 0.18 | 0.00  | 0.21  |
| 4580 | MTX1    | 0.09  | 0.00 | 0.14  | 0.27  |
| 4582 | MUC1    | 0.09  | 0.00 | 0.14  | 0.11  |
| 4583 | MUC2    | 0.00  | 0.00 | 0.00  | NaN   |
| 4585 | MUC4    | 0.04  | 0.09 | 0.00  | 0.16  |
| 4593 | MUSK    | -0.02 | 0.00 | 0.00  | -0.02 |
| 4594 | MUT     | 0.00  | 0.00 | 0.08  | 0.19  |
| 4595 | MUTYH   | 0.00  | 0.00 | 0.00  | NaN   |
| 4597 | MVD     | -0.04 | 0.00 | 0.03  | 0.11  |
| 4598 | MVK     | 0.00  | 0.00 | 0.00  | NaN   |
| 4599 | MX1     | 0.00  | 0.00 | 0.00  | 0.26  |
| 4600 | MX2     | 0.00  | 0.00 | 0.00  | 0.28  |
| 4601 | MX11    | -0.04 | 0.00 | 0.00  | 0.08  |
| 4602 | MYB     | -0.02 | 0.00 | 0.16  | 0.22  |
| 4605 | MYBL2   | 0.02  | 0.09 | 0.03  | 0.09  |
| 4606 | MYBPC2  | 0.00  | 0.00 | -0.03 | -0.03 |
| 4608 | MYBPH   | 0.09  | 0.00 | 0.05  | 0.02  |
| 4609 | MYC     | 0.24  | 0.27 | 0.38  | 0.17  |
| 4610 | MYCL1   | -0.02 | 0.09 | 0.00  | 0.00  |
| 4613 | MYCN    | -0.02 | 0.00 | 0.00  | 0.05  |
| 4615 | MYD88   | -0.04 | 0.00 | 0.00  | 0.26  |
| 4616 | GADD45B | 0.00  | 0.00 | 0.00  | NaN   |
| 4617 | MYF5    | 0.00  | 0.00 | 0.00  | NaN   |
| 4618 | MYF6    | 0.00  | 0.00 | 0.00  | NaN   |
| 4619 | MYH1    | -0.07 | 0.00 | 0.00  | -0.09 |
| 4620 | MYH2    | -0.07 | 0.00 | 0.00  | 0.03  |
| 4621 | MYH3    | -0.07 | 0.00 | 0.00  | 0.02  |
| 4622 | MYH4    | -0.07 | 0.00 | 0.00  | -0.11 |
| 4624 | MYH6    | 0.00  | 0.00 | 0.00  | 0.07  |
| 4625 | MYH7    | 0.00  | 0.00 | 0.00  | 0.05  |
| 4626 | MYH8    | -0.07 | 0.00 | 0.00  | 0.18  |
| 4627 | MYH9    | -0.02 | 0.00 | 0.03  | -0.08 |
| 4629 | MYH11   | 0.02  | 0.00 | 0.00  | 0.17  |
| 4632 | MYL1    | 0.00  | 0.00 | 0.00  | NaN   |
| 4633 | MYL2    | 0.00  | 0.00 | 0.00  | NaN   |
| 4634 | MYL3    | -0.04 | 0.00 | 0.00  | 0.05  |
| 4635 | MYL4    | -0.04 | 0.00 | 0.00  | 0.13  |
| 4637 | MYL6    | 0.00  | 0.00 | 0.00  | NaN   |
| 4638 | MYLK    | 0.00  | 0.00 | -0.03 | 0.14  |
| 4640 | MYO1A   | 0.02  | 0.00 | 0.00  | -0.14 |
| 4641 | MYO1C   | -0.05 | 0.00 | 0.00  | 0.12  |
| 4642 | MYO1D   | 0.00  | 0.18 | 0.00  | -0.01 |
| 4643 | MYO1E   | -0.02 | 0.00 | -0.05 | 0.00  |
| 4644 | MYO5A   | -0.02 | 0.00 | -0.05 | 0.18  |
| 4646 | MYO6    | -0.02 | 0.00 | -0.03 | 0.17  |
| 4647 | MYO7A   | 0.07  | 0.09 | 0.03  | 0.29  |

|      |          |       |       |       |       |
|------|----------|-------|-------|-------|-------|
| 4649 | MYO9A    | 0.00  | 0.00  | -0.05 | -0.02 |
| 4650 | MYO9B    | 0.04  | 0.00  | 0.00  | 0.14  |
| 4651 | MYO10    | 0.04  | 0.18  | 0.00  | 0.20  |
| 4653 | MYOC     | 0.02  | 0.00  | 0.05  | 0.02  |
| 4654 | MYOD1    | 0.00  | 0.00  | -0.05 | 0.01  |
| 4656 | MYOG     | 0.09  | 0.00  | 0.05  | 0.06  |
| 4659 | PPP1R12A | 0.00  | 0.00  | 0.00  | NaN   |
| 4660 | PPP1R12B | 0.09  | 0.00  | 0.05  | 0.19  |
| 4661 | MYT1     | 0.07  | 0.09  | 0.14  | 0.27  |
| 4664 | NAB1     | 0.00  | 0.00  | 0.00  | NaN   |
| 4665 | NAB2     | 0.02  | 0.00  | 0.00  | -0.01 |
| 4666 | NACA     | 0.00  | 0.00  | 0.00  | NaN   |
| 4668 | NAGA     | -0.02 | 0.00  | -0.03 | -0.08 |
| 4669 | NAGLU    | -0.04 | 0.00  | 0.00  | -0.03 |
| 4670 | HNRPM    | 0.00  | -0.09 | 0.00  | 0.02  |
| 4673 | NAP1L1   | -0.02 | 0.00  | 0.00  | 0.26  |
| 4674 | NAP1L2   | -0.04 | 0.00  | -0.08 | 0.04  |
| 4675 | NAP1L3   | -0.07 | 0.00  | -0.08 | 0.08  |
| 4676 | NAP1L4   | -0.02 | 0.00  | -0.03 | 0.06  |
| 4677 | NARS     | -0.02 | 0.00  | -0.03 | 0.29  |
| 4678 | NASP     | 0.00  | 0.00  | 0.00  | NaN   |
| 4680 | CEACAM6  | 0.02  | 0.00  | -0.03 | 0.11  |
| 4681 | NBL1     | 0.00  | 0.00  | 0.00  | NaN   |
| 4682 | NUBP1    | 0.04  | 0.00  | 0.00  | 0.17  |
| 4684 | NCAM1    | -0.07 | 0.00  | 0.00  | 0.09  |
| 4685 | NCAM2    | 0.00  | 0.00  | -0.03 | -0.03 |
| 4686 | NCBP1    | -0.02 | 0.00  | 0.00  | 0.21  |
| 4688 | NCF2     | 0.07  | 0.00  | 0.03  | -0.26 |
| 4689 | NCF4     | -0.04 | 0.00  | 0.03  | 0.08  |
| 4690 | NCK1     | 0.02  | 0.00  | -0.03 | 0.36  |
| 4691 | NCL      | 0.00  | 0.00  | 0.00  | NaN   |
| 4692 | NDN      | 0.00  | 0.09  | -0.08 | -0.09 |
| 4693 | NDP      | -0.05 | 0.00  | -0.11 | -0.12 |
| 4694 | NDUFA1   | -0.05 | 0.00  | -0.08 | 0.21  |
| 4695 | NDUFA2   | 0.00  | 0.00  | 0.00  | NaN   |
| 4696 | NDUFA3   | 0.00  | 0.09  | 0.00  | 0.53  |
| 4697 | NDUFA4   | -0.02 | 0.00  | 0.00  | 0.07  |
| 4698 | NDUFA5   | 0.00  | 0.00  | -0.03 | 0.12  |
| 4700 | NDUFA6   | -0.02 | 0.00  | -0.03 | 0.20  |
| 4701 | NDUFA7   | 0.00  | -0.09 | 0.00  | -0.01 |
| 4702 | NDUFA8   | -0.02 | 0.00  | 0.00  | 0.12  |
| 4703 | NEB      | -0.02 | 0.00  | 0.03  | -0.02 |
| 4704 | NDUFA9   | -0.02 | 0.09  | 0.08  | 0.45  |
| 4705 | NDUFA10  | 0.00  | 0.00  | 0.00  | NaN   |
| 4706 | NDUFAB1  | 0.02  | 0.00  | 0.00  | 0.13  |
| 4707 | NDUFB1   | -0.02 | 0.00  | 0.03  | 0.30  |
| 4708 | NDUFB2   | 0.02  | 0.00  | 0.00  | 0.11  |

|      |         |       |       |       |       |
|------|---------|-------|-------|-------|-------|
| 4709 | NDUFB3  | 0.00  | 0.00  | 0.00  | NaN   |
| 4711 | NDUFB5  | 0.04  | 0.00  | 0.03  | 0.44  |
| 4712 | NDUFB6  | -0.05 | 0.09  | 0.00  | -0.11 |
| 4714 | NDUFB8  | -0.02 | 0.00  | -0.03 | 0.28  |
| 4717 | NDUFC1  | 0.00  | 0.00  | 0.00  | NaN   |
| 4718 | NDUFC2  | 0.11  | 0.09  | 0.03  | 0.55  |
| 4719 | NDUFS1  | 0.00  | 0.00  | 0.00  | NaN   |
| 4720 | NDUFS2  | 0.11  | 0.00  | 0.14  | 0.47  |
| 4722 | NDUFS3  | -0.02 | 0.00  | -0.03 | 0.31  |
| 4724 | NDUFS4  | 0.00  | 0.00  | -0.08 | 0.30  |
| 4725 | NDUFS5  | 0.00  | 0.09  | 0.00  | 0.17  |
| 4726 | NDUFS6  | 0.02  | 0.18  | 0.00  | 0.33  |
| 4728 | NDUFS8  | 0.07  | 0.09  | 0.03  | 0.34  |
| 4729 | NDUFV2  | -0.02 | -0.09 | 0.00  | 0.06  |
| 4733 | DRG1    | 0.00  | 0.00  | 0.03  | -0.12 |
| 4734 | NEDD4   | -0.02 | 0.00  | -0.05 | 0.16  |
| 4736 | RPL10A  | 0.00  | 0.00  | 0.05  | 0.04  |
| 4738 | NEDD8   | -0.02 | 0.00  | 0.00  | -0.04 |
| 4744 | NEFH    | 0.00  | 0.00  | 0.03  | 0.02  |
| 4745 | NELL1   | 0.00  | 0.00  | -0.05 | 0.01  |
| 4747 | NEFL    | -0.11 | -0.18 | -0.19 | 0.06  |
| 4750 | NEK1    | -0.02 | 0.00  | -0.05 | 0.21  |
| 4751 | NEK2    | 0.07  | 0.00  | 0.00  | 0.17  |
| 4752 | NEK3    | -0.07 | 0.00  | -0.08 | 0.27  |
| 4753 | NELL2   | 0.00  | 0.00  | 0.05  | 0.03  |
| 4756 | NEO1    | 0.00  | 0.00  | -0.03 | 0.04  |
| 4758 | NEU1    | 0.00  | 0.00  | 0.05  | 0.11  |
| 4759 | NEU2    | 0.00  | 0.00  | 0.00  | NaN   |
| 4760 | NEUROD1 | 0.00  | 0.00  | 0.00  | NaN   |
| 4761 | NEUROD2 | 0.02  | 0.82  | 0.05  | 0.07  |
| 4762 | NEUROG1 | 0.00  | 0.00  | -0.03 | -0.08 |
| 4763 | NF1     | 0.02  | 0.09  | 0.00  | 0.24  |
| 4771 | NF2     | 0.00  | 0.00  | 0.03  | 0.22  |
| 4772 | NFATC1  | -0.02 | -0.09 | 0.00  | 0.20  |
| 4775 | NFATC3  | -0.05 | 0.00  | 0.00  | 0.13  |
| 4776 | NFATC4  | -0.02 | 0.00  | 0.00  | -0.12 |
| 4778 | NFE2    | 0.02  | 0.00  | -0.03 | -0.20 |
| 4779 | NFE2L1  | 0.05  | 0.18  | 0.00  | 0.55  |
| 4780 | NFE2L2  | 0.02  | 0.00  | 0.00  | 0.15  |
| 4781 | NFIB    | -0.05 | 0.00  | -0.03 | 0.06  |
| 4782 | NFIC    | 0.00  | 0.00  | 0.00  | NaN   |
| 4783 | NFIL3   | -0.02 | 0.00  | 0.00  | -0.16 |
| 4784 | NFIX    | 0.00  | -0.09 | 0.00  | -0.01 |
| 4790 | NFKB1   | -0.04 | 0.00  | 0.00  | 0.11  |
| 4791 | NFKB2   | 0.00  | 0.00  | -0.03 | 0.18  |
| 4792 | NFKBIA  | 0.02  | 0.09  | 0.00  | 0.11  |
| 4793 | NFKBIB  | 0.02  | 0.09  | 0.05  | 0.13  |

|      |         |       |       |       |       |
|------|---------|-------|-------|-------|-------|
| 4794 | NFKBIE  | 0.00  | 0.00  | 0.11  | -0.01 |
| 4795 | NFKBIL1 | 0.00  | 0.00  | 0.05  | 0.04  |
| 4798 | NFRKB   | -0.05 | 0.00  | -0.03 | 0.19  |
| 4799 | NFX1    | 0.00  | 0.09  | 0.00  | 0.24  |
| 4800 | NFYA    | 0.00  | 0.00  | 0.08  | 0.18  |
| 4801 | NFYB    | 0.00  | 0.00  | 0.00  | NaN   |
| 4802 | NFYC    | 0.00  | 0.00  | 0.00  | NaN   |
| 4803 | NGFB    | -0.02 | 0.00  | -0.03 | -0.16 |
| 4804 | NGFR    | 0.15  | 0.27  | 0.03  | 0.00  |
| 4809 | NHP2L1  | -0.02 | 0.00  | -0.03 | 0.40  |
| 4814 | NINJ1   | -0.02 | 0.00  | 0.00  | 0.01  |
| 4815 | NINJ2   | 0.00  | 0.09  | 0.08  | 0.18  |
| 4817 | NIT1    | 0.11  | 0.00  | 0.14  | 0.41  |
| 4818 | NKG7    | 0.00  | 0.00  | -0.03 | 0.21  |
| 4820 | NKTR    | -0.04 | 0.00  | 0.00  | 0.08  |
| 4828 | NMB     | 0.02  | 0.00  | -0.03 | 0.09  |
| 4829 | NMBR    | 0.00  | 0.00  | 0.03  | -0.09 |
| 4832 | NME3    | 0.04  | 0.18  | 0.00  | 0.23  |
| 4833 | NME4    | 0.05  | 0.18  | 0.05  | 0.28  |
| 4835 | NQO2    | -0.02 | 0.00  | 0.00  | 0.39  |
| 4836 | NMT1    | -0.05 | 0.00  | 0.00  | 0.14  |
| 4837 | NNMT    | -0.09 | 0.00  | 0.00  | 0.12  |
| 4839 | NOL1    | -0.02 | 0.09  | 0.05  | 0.37  |
| 4841 | NONO    | -0.04 | 0.00  | -0.08 | 0.32  |
| 4842 | NOS1    | 0.02  | 0.00  | -0.03 | 0.13  |
| 4843 | NOS2A   | 0.00  | 0.18  | 0.00  | -0.01 |
| 4846 | NOS3    | 0.02  | 0.00  | 0.00  | 0.03  |
| 4848 | CNOT2   | 0.04  | 0.00  | 0.03  | 0.35  |
| 4849 | CNOT3   | 0.00  | 0.09  | 0.00  | 0.49  |
| 4850 | CNOT4   | 0.02  | 0.00  | 0.03  | 0.16  |
| 4852 | NPY     | -0.02 | 0.18  | 0.03  | -0.02 |
| 4853 | NOTCH2  | 0.00  | 0.00  | 0.03  | 0.12  |
| 4854 | NOTCH3  | 0.02  | 0.00  | 0.00  | 0.24  |
| 4855 | NOTCH4  | 0.00  | 0.00  | 0.05  | 0.06  |
| 4856 | NOV     | 0.20  | 0.18  | 0.38  | 0.16  |
| 4857 | NOVA1   | -0.02 | 0.00  | -0.03 | 0.04  |
| 4858 | NOVA2   | -0.02 | 0.00  | 0.00  | 0.29  |
| 4860 | NP      | -0.02 | 0.00  | -0.03 | 0.05  |
| 4861 | NPAS1   | -0.05 | 0.00  | -0.03 | 0.06  |
| 4862 | NPAS2   | 0.02  | 0.00  | 0.00  | 0.06  |
| 4863 | NPAT    | -0.07 | -0.09 | 0.00  | 0.24  |
| 4864 | NPC1    | 0.00  | -0.09 | 0.03  | 0.40  |
| 4867 | NPHP1   | 0.00  | 0.00  | 0.00  | NaN   |
| 4868 | NPHS1   | 0.00  | 0.09  | 0.05  | 0.04  |
| 4869 | NPM1    | 0.00  | 0.00  | -0.03 | 0.08  |
| 4879 | NPPB    | -0.02 | 0.00  | 0.00  | 0.16  |
| 4881 | NPR1    | 0.07  | 0.00  | 0.16  | 0.23  |

|      |         |       |       |       |       |
|------|---------|-------|-------|-------|-------|
| 4882 | NPR2    | 0.00  | 0.00  | 0.00  | 0.20  |
| 4883 | NPR3    | 0.02  | 0.18  | 0.00  | -0.05 |
| 4884 | NPTX1   | 0.00  | 0.00  | 0.05  | 0.08  |
| 4885 | NPTX2   | 0.02  | 0.00  | 0.00  | -0.07 |
| 4886 | NPY1R   | 0.02  | 0.00  | -0.05 | 0.10  |
| 4887 | NPY2R   | -0.02 | 0.00  | -0.03 | 0.28  |
| 4889 | NPY5R   | 0.02  | 0.00  | -0.05 | -0.04 |
| 4891 | SLC11A2 | 0.02  | 0.00  | -0.03 | 0.18  |
| 4893 | NRAS    | 0.00  | -0.09 | 0.00  | 0.07  |
| 4897 | NRCAM   | 0.02  | 0.00  | -0.03 | -0.01 |
| 4898 | NRD1    | 0.00  | 0.00  | -0.03 | 0.16  |
| 4899 | NRF1    | 0.02  | 0.00  | 0.00  | 0.16  |
| 4900 | NRGN    | -0.05 | 0.00  | -0.03 | 0.07  |
| 4901 | NRL     | -0.02 | 0.00  | 0.00  | 0.08  |
| 4902 | NRTN    | -0.02 | -0.09 | 0.00  | 0.12  |
| 4905 | NSF     | -0.04 | 0.00  | 0.00  | -0.02 |
| 4907 | NT5E    | -0.02 | 0.00  | -0.05 | 0.18  |
| 4908 | NTF3    | -0.02 | 0.18  | 0.05  | -0.05 |
| 4913 | NTHL1   | 0.04  | 0.18  | 0.00  | 0.27  |
| 4914 | NTRK1   | 0.04  | 0.00  | 0.11  | -0.08 |
| 4915 | NTRK2   | -0.02 | 0.00  | 0.00  | 0.03  |
| 4916 | NTRK3   | 0.00  | 0.00  | -0.05 | 0.07  |
| 4917 | NTN2L   | 0.04  | 0.09  | 0.00  | 0.10  |
| 4919 | ROR1    | -0.02 | 0.00  | 0.00  | 0.17  |
| 4920 | ROR2    | -0.02 | 0.00  | 0.00  | 0.07  |
| 4921 | DDR2    | 0.05  | 0.00  | 0.14  | 0.27  |
| 4922 | NTS     | 0.00  | 0.00  | 0.00  | NaN   |
| 4923 | NTSR1   | 0.04  | 0.09  | 0.08  | -0.06 |
| 4924 | NUCB1   | 0.00  | 0.00  | -0.03 | 0.41  |
| 4925 | NUCB2   | 0.00  | 0.00  | -0.05 | 0.14  |
| 4926 | NUMA1   | -0.02 | 0.09  | 0.00  | 0.22  |
| 4927 | NUP88   | -0.04 | 0.00  | 0.00  | 0.12  |
| 4928 | NUP98   | -0.02 | 0.00  | -0.03 | 0.00  |
| 4929 | NR4A2   | 0.00  | 0.00  | 0.03  | 0.01  |
| 4931 | NVL     | 0.09  | 0.00  | 0.00  | 0.21  |
| 4938 | OAS1    | 0.02  | 0.00  | 0.00  | -0.14 |
| 4939 | OAS2    | 0.02  | 0.00  | 0.00  | -0.10 |
| 4940 | OAS3    | 0.02  | 0.00  | 0.00  | -0.13 |
| 4942 | OAT     | -0.04 | 0.00  | 0.03  | 0.32  |
| 4947 | OAZ2    | 0.00  | 0.09  | -0.05 | 0.14  |
| 4948 | OCA2    | -0.04 | 0.09  | -0.08 | 0.11  |
| 4952 | OCRL    | -0.05 | 0.00  | -0.08 | 0.18  |
| 4953 | ODC1    | -0.02 | 0.00  | 0.00  | 0.15  |
| 4956 | ODF1    | 0.22  | 0.09  | 0.32  | 0.05  |
| 4957 | ODF2    | 0.02  | 0.00  | 0.00  | 0.12  |
| 4967 | OGDH    | -0.02 | 0.00  | 0.08  | 0.20  |
| 4968 | OGG1    | -0.02 | 0.00  | 0.00  | 0.07  |



|      |           |       |       |       |       |
|------|-----------|-------|-------|-------|-------|
| 4973 | OLR1      | 0.00  | -0.18 | 0.08  | 0.05  |
| 4976 | OPA1      | 0.02  | 0.09  | 0.00  | 0.35  |
| 4978 | OPCML     | -0.07 | 0.00  | -0.05 | 0.14  |
| 4982 | TNFRSF11B | 0.22  | 0.18  | 0.38  | 0.16  |
| 4983 | OPHN1     | -0.04 | 0.00  | -0.05 | -0.10 |
| 4985 | OPRD1     | -0.02 | 0.09  | 0.00  | -0.11 |
| 4986 | OPRK1     | 0.13  | 0.00  | 0.14  | 0.00  |
| 4987 | OPRL1     | 0.07  | 0.09  | 0.11  | 0.01  |
| 4988 | OPRM1     | 0.00  | 0.00  | -0.03 | 0.02  |
| 4990 | SIX6      | 0.00  | 0.00  | -0.03 | 0.01  |
| 4991 | OR1D2     | -0.05 | 0.00  | 0.00  | 0.06  |
| 4992 | OR1F1     | 0.04  | 0.00  | 0.00  | -0.04 |
| 4993 | OR2C1     | 0.04  | 0.00  | 0.00  | -0.06 |
| 4994 | OR3A1     | -0.05 | 0.00  | 0.00  | -0.01 |
| 4998 | ORC1L     | 0.00  | 0.00  | -0.03 | -0.08 |
| 4999 | ORC2L     | 0.00  | 0.00  | 0.00  | NaN   |
| 5000 | ORC4L     | -0.02 | 0.00  | 0.00  | 0.01  |
| 5001 | ORC5L     | 0.02  | 0.00  | 0.00  | 0.09  |
| 5005 | ORM2      | -0.02 | 0.00  | 0.00  | -0.03 |
| 5007 | OSBP      | -0.04 | 0.00  | 0.00  | 0.09  |
| 5008 | OSM       | 0.00  | 0.00  | 0.05  | 0.02  |
| 5009 | OTC       | -0.05 | 0.00  | -0.11 | 0.16  |
| 5010 | CLDN11    | 0.05  | 0.00  | 0.05  | -0.10 |
| 5016 | OVGP1     | 0.00  | 0.00  | -0.03 | -0.04 |
| 5017 | OVOL1     | 0.02  | 0.00  | 0.05  | 0.07  |
| 5018 | OXA1L     | -0.02 | 0.00  | 0.00  | 0.02  |
| 5020 | OXT       | 0.00  | 0.00  | 0.00  | -0.08 |
| 5021 | OXTR      | 0.00  | 0.00  | 0.00  | 0.16  |
| 5023 | P2RX1     | -0.04 | 0.00  | 0.00  | 0.12  |
| 5024 | P2RX3     | 0.00  | 0.00  | 0.05  | -0.03 |
| 5025 | P2RX4     | 0.02  | 0.09  | 0.00  | 0.05  |
| 5026 | P2RX5     | -0.04 | 0.00  | 0.00  | 0.13  |
| 5027 | P2RX7     | 0.02  | 0.00  | 0.00  | -0.19 |
| 5028 | P2RY1     | 0.02  | 0.00  | 0.03  | 0.02  |
| 5029 | P2RY2     | 0.05  | 0.09  | -0.03 | 0.40  |
| 5030 | P2RY4     | -0.04 | 0.00  | -0.08 | -0.09 |
| 5031 | P2RY6     | 0.05  | 0.09  | -0.03 | 0.14  |
| 5033 | P4HA1     | -0.02 | 0.00  | 0.00  | 0.12  |
| 5034 | P4HB      | 0.00  | 0.09  | 0.08  | 0.14  |
| 5047 | PAEP      | 0.02  | 0.00  | 0.03  | 0.06  |
| 5048 | PAFAH1B1  | -0.05 | 0.00  | -0.03 | 0.15  |
| 5049 | PAFAH1B2  | -0.07 | 0.00  | 0.00  | 0.09  |
| 5050 | PAFAH1B3  | 0.02  | 0.00  | -0.03 | 0.24  |
| 5051 | PAFAH2    | -0.02 | 0.00  | 0.00  | 0.17  |
| 5052 | PRDX1     | 0.00  | 0.00  | 0.00  | NaN   |
| 5053 | PAH       | 0.00  | 0.00  | 0.03  | 0.08  |
| 5054 | SERPINE1  | 0.02  | 0.00  | 0.00  | -0.04 |

|      |          |       |       |       |       |
|------|----------|-------|-------|-------|-------|
| 5055 | SERPINB2 | -0.02 | -0.09 | 0.00  | -0.07 |
| 5058 | PAK1     | 0.07  | 0.09  | 0.03  | 0.27  |
| 5062 | PAK2     | 0.02  | 0.09  | -0.03 | 0.26  |
| 5063 | PAK3     | -0.05 | 0.00  | -0.08 | -0.11 |
| 5064 | PALM     | 0.00  | 0.00  | -0.03 | 0.02  |
| 5066 | PAM      | 0.00  | 0.00  | -0.14 | -0.01 |
| 5069 | PAPPA    | -0.04 | 0.00  | 0.00  | 0.25  |
| 5071 | PARK2    | -0.02 | 0.00  | -0.08 | -0.11 |
| 5073 | PARN     | 0.02  | 0.00  | 0.00  | 0.15  |
| 5074 | PAWR     | -0.02 | 0.00  | 0.00  | 0.23  |
| 5076 | PAX2     | -0.02 | 0.00  | -0.03 | -0.08 |
| 5077 | PAX3     | 0.00  | 0.00  | 0.00  | NaN   |
| 5078 | PAX4     | 0.02  | 0.00  | -0.03 | 0.17  |
| 5079 | PAX5     | -0.02 | 0.00  | 0.03  | 0.06  |
| 5080 | PAX6     | 0.04  | 0.00  | 0.00  | 0.05  |
| 5081 | PAX7     | 0.00  | 0.00  | 0.00  | NaN   |
| 5082 | PDCL     | -0.02 | 0.00  | 0.00  | 0.05  |
| 5083 | PAX9     | 0.04  | 0.09  | 0.00  | 0.06  |
| 5087 | PBX1     | 0.05  | 0.00  | 0.11  | 0.19  |
| 5089 | PBX2     | 0.00  | 0.00  | 0.05  | 0.14  |
| 5090 | PBX3     | -0.02 | 0.00  | 0.03  | 0.04  |
| 5091 | PC       | 0.07  | 0.09  | 0.03  | 0.21  |
| 5093 | PCBP1    | 0.02  | 0.00  | 0.00  | 0.06  |
| 5094 | PCBP2    | 0.02  | 0.09  | -0.03 | 0.36  |
| 5095 | PCCA     | -0.02 | 0.00  | -0.05 | 0.01  |
| 5096 | PCCB     | 0.00  | 0.00  | 0.00  | NaN   |
| 5097 | PCDH1    | 0.00  | 0.00  | 0.00  | NaN   |
| 5099 | PCDH7    | -0.05 | -0.09 | -0.05 | 0.08  |
| 5100 | PCDH8    | -0.07 | 0.00  | -0.08 | 0.17  |
| 5101 | PCDH9    | -0.07 | -0.09 | -0.14 | 0.06  |
| 5104 | SERPINA5 | -0.02 | 0.00  | -0.03 | 0.06  |
| 5105 | PCK1     | 0.05  | 0.00  | 0.05  | 0.45  |
| 5108 | PCM1     | -0.16 | -0.18 | -0.22 | 0.36  |
| 5110 | PCMT1    | 0.00  | 0.00  | -0.03 | 0.48  |
| 5111 | PCNA     | 0.02  | 0.00  | -0.05 | 0.12  |
| 5118 | PCOLCE   | 0.02  | 0.00  | 0.00  | 0.13  |
| 5119 | PCOLN3   | -0.04 | 0.00  | 0.03  | 0.20  |
| 5121 | PCP4     | 0.00  | 0.00  | -0.03 | 0.18  |
| 5122 | PCSK1    | 0.00  | 0.00  | -0.14 | 0.03  |
| 5125 | PCSK5    | -0.02 | 0.00  | 0.00  | 0.04  |
| 5126 | PCSK2    | 0.00  | 0.00  | -0.08 | -0.10 |
| 5127 | PCTK1    | -0.05 | 0.00  | -0.08 | 0.10  |
| 5128 | PCTK2    | 0.00  | 0.09  | 0.00  | 0.20  |
| 5130 | PCYT1A   | 0.02  | 0.09  | 0.00  | 0.23  |
| 5132 | PDC      | 0.04  | 0.09  | 0.03  | -0.13 |
| 5133 | PDCD1    | 0.00  | 0.00  | 0.00  | NaN   |
| 5134 | PDCD2    | -0.02 | 0.00  | -0.03 | 0.22  |

|      |          |       |       |       |       |
|------|----------|-------|-------|-------|-------|
| 5136 | PDE1A    | 0.00  | 0.00  | 0.00  | NaN   |
| 5137 | PDE1C    | -0.02 | 0.09  | -0.03 | -0.12 |
| 5138 | PDE2A    | 0.00  | 0.09  | 0.00  | 0.01  |
| 5139 | PDE3A    | 0.00  | 0.00  | 0.08  | 0.07  |
| 5140 | PDE3B    | -0.02 | 0.00  | -0.05 | 0.02  |
| 5141 | PDE4A    | 0.02  | 0.00  | 0.00  | 0.19  |
| 5142 | PDE4B    | -0.02 | 0.00  | 0.00  | 0.07  |
| 5143 | PDE4C    | 0.02  | 0.00  | 0.00  | -0.02 |
| 5144 | PDE4D    | 0.00  | 0.09  | -0.11 | 0.21  |
| 5145 | PDE6A    | 0.00  | 0.00  | 0.00  | NaN   |
| 5146 | PDE6C    | -0.02 | 0.00  | -0.05 | -0.06 |
| 5147 | PDE6D    | 0.00  | 0.00  | 0.00  | NaN   |
| 5148 | PDE6G    | 0.00  | 0.09  | 0.08  | 0.16  |
| 5149 | PDE6H    | 0.00  | -0.09 | 0.05  | -0.02 |
| 5151 | PDE8A    | 0.00  | 0.00  | -0.03 | -0.03 |
| 5152 | PDE9A    | 0.00  | 0.00  | 0.00  | 0.01  |
| 5153 | PDE1B    | 0.02  | 0.00  | -0.03 | -0.13 |
| 5155 | PDGFB    | -0.04 | 0.00  | -0.03 | -0.12 |
| 5156 | PDGFRA   | -0.02 | 0.00  | 0.00  | 0.12  |
| 5157 | PDGFRL   | -0.16 | -0.18 | -0.22 | 0.03  |
| 5158 | PDE6B    | -0.02 | 0.00  | -0.03 | 0.07  |
| 5159 | PDGFRB   | 0.00  | 0.00  | 0.00  | NaN   |
| 5160 | PDHA1    | -0.05 | 0.00  | -0.11 | 0.22  |
| 5161 | PDHA2    | -0.04 | 0.00  | 0.00  | 0.07  |
| 5162 | PDHB     | -0.04 | 0.00  | 0.00  | 0.06  |
| 5163 | PDK1     | 0.00  | 0.00  | 0.00  | -0.03 |
| 5164 | PDK2     | 0.13  | 0.18  | 0.03  | 0.32  |
| 5165 | PDK3     | -0.05 | 0.00  | -0.11 | 0.06  |
| 5166 | PDK4     | 0.02  | 0.00  | -0.03 | 0.03  |
| 5167 | ENPP1    | -0.02 | 0.00  | 0.08  | 0.14  |
| 5168 | ENPP2    | 0.20  | 0.18  | 0.38  | 0.12  |
| 5169 | ENPP3    | 0.00  | 0.00  | 0.05  | 0.01  |
| 5170 | PDPK1    | 0.05  | 0.09  | 0.03  | 0.22  |
| 5172 | SLC26A4  | 0.02  | 0.00  | -0.03 | 0.25  |
| 5173 | PDYN     | 0.02  | 0.00  | -0.03 | -0.06 |
| 5174 | PDZK1    | 0.04  | 0.00  | 0.11  | -0.14 |
| 5175 | PECAM1   | 0.15  | 0.18  | 0.03  | -0.14 |
| 5176 | SERPINF1 | -0.05 | 0.00  | 0.00  | 0.02  |
| 5179 | PENK     | 0.11  | 0.00  | 0.11  | 0.03  |
| 5184 | PEPD     | 0.00  | 0.00  | 0.05  | -0.17 |
| 5187 | PER1     | -0.05 | 0.00  | 0.00  | 0.08  |
| 5188 | PET112L  | -0.02 | 0.00  | 0.00  | -0.11 |
| 5189 | PEX1     | 0.02  | 0.00  | 0.08  | 0.38  |
| 5190 | PEX6     | 0.00  | 0.00  | 0.08  | 0.15  |
| 5191 | PEX7     | -0.02 | 0.00  | 0.08  | 0.38  |
| 5192 | PEX10    | -0.02 | 0.00  | 0.03  | 0.11  |
| 5193 | PEX12    | -0.02 | -0.09 | 0.03  | 0.12  |

|      |          |       |       |       |       |
|------|----------|-------|-------|-------|-------|
| 5194 | PEX13    | 0.00  | 0.00  | 0.00  | NaN   |
| 5195 | PEX14    | 0.00  | 0.00  | 0.00  | NaN   |
| 5196 | PF4      | -0.02 | 0.00  | 0.00  | 0.04  |
| 5198 | PFAS     | -0.05 | 0.00  | 0.00  | 0.08  |
| 5201 | PFDN1    | 0.00  | 0.00  | 0.00  | NaN   |
| 5202 | PFDN2    | 0.11  | 0.00  | 0.14  | 0.42  |
| 5203 | PFDN4    | 0.07  | 0.09  | 0.05  | 0.34  |
| 5204 | PFDN5    | 0.02  | 0.00  | -0.03 | 0.08  |
| 5205 | ATP8B1   | -0.02 | 0.00  | -0.03 | 0.05  |
| 5207 | PFKFB1   | -0.04 | 0.00  | -0.05 | -0.07 |
| 5208 | PFKFB2   | 0.09  | 0.00  | 0.00  | 0.10  |
| 5209 | PFKFB3   | 0.00  | 0.00  | 0.11  | 0.06  |
| 5210 | PFKFB4   | -0.04 | 0.00  | 0.00  | 0.05  |
| 5211 | PFKL     | 0.00  | 0.00  | 0.00  | 0.41  |
| 5213 | PFKM     | 0.00  | 0.00  | 0.00  | NaN   |
| 5214 | PFKP     | 0.02  | 0.00  | 0.11  | 0.14  |
| 5216 | PFN1     | -0.04 | 0.00  | 0.00  | 0.11  |
| 5217 | PFN2     | 0.02  | 0.00  | 0.03  | 0.19  |
| 5218 | PFTK1    | 0.02  | 0.00  | 0.05  | 0.35  |
| 5223 | PGAM1    | -0.02 | -0.09 | -0.03 | 0.08  |
| 5224 | PGAM2    | -0.02 | 0.00  | 0.05  | 0.06  |
| 5225 | PGC      | 0.00  | 0.00  | 0.08  | -0.05 |
| 5226 | PGD      | 0.00  | 0.00  | 0.00  | NaN   |
| 5228 | PGF      | -0.02 | 0.00  | 0.00  | 0.11  |
| 5229 | PGGT1B   | 0.00  | 0.00  | -0.05 | 0.14  |
| 5230 | PGK1     | -0.04 | 0.00  | -0.08 | 0.21  |
| 5236 | PGM1     | -0.02 | 0.00  | 0.00  | 0.21  |
| 5239 | PGM5     | -0.02 | 0.00  | -0.03 | 0.10  |
| 5241 | PGR      | -0.04 | -0.09 | 0.00  | 0.07  |
| 5243 | ABCB1    | 0.02  | 0.00  | 0.03  | 0.22  |
| 5244 | ABCB4    | 0.02  | 0.00  | 0.00  | 0.03  |
| 5245 | PHB      | 0.13  | 0.27  | 0.00  | 0.65  |
| 5250 | SLC25A3  | 0.00  | 0.00  | 0.00  | NaN   |
| 5251 | PHEX     | -0.05 | 0.00  | -0.11 | 0.32  |
| 5252 | PHF1     | 0.00  | 0.00  | 0.05  | 0.04  |
| 5253 | PHF2     | -0.02 | 0.00  | 0.00  | 0.07  |
| 5255 | PHKA1    | -0.04 | 0.00  | -0.08 | 0.09  |
| 5256 | PHKA2    | -0.05 | -0.09 | -0.11 | 0.20  |
| 5257 | PHKB     | -0.11 | 0.09  | 0.03  | 0.20  |
| 5260 | PHKG1    | 0.00  | 0.00  | 0.05  | 0.11  |
| 5261 | PHKG2    | 0.07  | 0.00  | 0.00  | 0.22  |
| 5264 | PHYH     | 0.02  | 0.00  | 0.14  | 0.32  |
| 5265 | SERPINA1 | -0.02 | 0.00  | 0.00  | 0.07  |
| 5266 | PI3      | 0.02  | 0.09  | 0.03  | 0.00  |
| 5267 | SERPINA4 | -0.02 | 0.00  | -0.03 | 0.03  |
| 5268 | SERPINB5 | -0.02 | -0.09 | 0.00  | -0.07 |
| 5271 | SERPINB8 | -0.02 | -0.09 | 0.00  | 0.12  |

|      |           |       |       |       |       |
|------|-----------|-------|-------|-------|-------|
| 5272 | SERPINB9  | -0.02 | 0.00  | 0.00  | 0.13  |
| 5273 | SERPINB10 | -0.02 | -0.09 | 0.00  | 0.11  |
| 5274 | SERPIN1   | 0.02  | 0.00  | 0.00  | 0.07  |
| 5275 | SERPINB13 | -0.02 | -0.09 | 0.00  | 0.02  |
| 5276 | SERPIN2   | 0.02  | 0.00  | 0.00  | 0.02  |
| 5277 | PIGA      | -0.05 | 0.00  | -0.14 | 0.07  |
| 5281 | PIGF      | 0.00  | 0.00  | 0.00  | NaN   |
| 5283 | PIGH      | -0.02 | 0.00  | 0.00  | 0.01  |
| 5284 | PIGR      | 0.09  | 0.00  | 0.00  | 0.06  |
| 5287 | PIK3C2B   | 0.07  | 0.00  | 0.05  | -0.05 |
| 5288 | PIK3C2G   | 0.00  | -0.09 | 0.05  | -0.03 |
| 5289 | PIK3C3    | 0.00  | -0.09 | -0.03 | 0.01  |
| 5290 | PIK3CA    | 0.04  | 0.00  | 0.03  | 0.30  |
| 5291 | PIK3CB    | 0.02  | 0.00  | 0.00  | 0.20  |
| 5292 | PIM1      | 0.02  | 0.00  | 0.08  | 0.17  |
| 5293 | PIK3CD    | -0.02 | 0.00  | 0.00  | 0.14  |
| 5294 | PIK3CG    | 0.02  | 0.00  | -0.03 | -0.02 |
| 5295 | PIK3R1    | 0.00  | 0.00  | -0.08 | 0.14  |
| 5296 | PIK3R2    | 0.02  | 0.00  | 0.00  | 0.14  |
| 5297 | PIK4CA    | -0.02 | 0.00  | 0.05  | -0.29 |
| 5298 | PIK4CB    | 0.07  | 0.09  | 0.19  | 0.19  |
| 5300 | PIN1      | 0.00  | 0.00  | 0.00  | NaN   |
| 5303 | PIN4      | -0.04 | 0.00  | -0.08 | 0.07  |
| 5304 | PIP       | 0.02  | 0.00  | 0.00  | -0.15 |
| 5305 | PIP5K2A   | -0.02 | 0.00  | 0.05  | -0.02 |
| 5307 | PITX1     | 0.00  | 0.00  | -0.03 | -0.09 |
| 5308 | PITX2     | -0.02 | 0.00  | 0.00  | 0.00  |
| 5309 | PITX3     | 0.00  | 0.00  | -0.03 | 0.18  |
| 5310 | PKD1      | 0.04  | 0.18  | 0.00  | 0.12  |
| 5311 | PKD2      | -0.04 | 0.00  | -0.03 | 0.17  |
| 5313 | PKLR      | 0.09  | 0.00  | 0.14  | -0.08 |
| 5315 | PKM2      | 0.00  | 0.00  | -0.05 | -0.05 |
| 5316 | PKNOX1    | 0.00  | 0.00  | 0.03  | 0.04  |
| 5317 | PKP1      | 0.07  | 0.00  | 0.05  | 0.08  |
| 5318 | PKP2      | 0.00  | 0.09  | 0.05  | 0.16  |
| 5319 | PLA2G1B   | 0.02  | 0.00  | 0.00  | 0.14  |
| 5320 | PLA2G2A   | 0.00  | 0.00  | 0.00  | NaN   |
| 5321 | PLA2G4A   | 0.09  | 0.09  | 0.03  | -0.08 |
| 5322 | PLA2G5    | 0.00  | 0.00  | 0.00  | NaN   |
| 5324 | PLAG1     | 0.11  | 0.00  | 0.14  | 0.12  |
| 5325 | PLAGL1    | 0.02  | 0.00  | 0.00  | 0.08  |
| 5326 | PLAGL2    | 0.00  | 0.00  | 0.00  | NaN   |
| 5327 | PLAT      | 0.02  | 0.09  | 0.11  | -0.04 |
| 5328 | PLAU      | 0.04  | 0.00  | 0.00  | 0.20  |
| 5329 | PLAUR     | -0.02 | 0.00  | -0.03 | 0.11  |
| 5330 | PLCB2     | -0.02 | 0.00  | -0.14 | 0.08  |
| 5332 | PLCB4     | 0.00  | 0.00  | -0.05 | 0.24  |

|      |          |       |       |       |       |
|------|----------|-------|-------|-------|-------|
| 5333 | PLCD1    | 0.00  | 0.00  | 0.00  | -0.09 |
| 5334 | PLCL1    | 0.00  | 0.00  | 0.00  | NaN   |
| 5335 | PLCG1    | 0.04  | 0.00  | 0.00  | 0.00  |
| 5336 | PLCG2    | -0.09 | 0.00  | 0.00  | 0.14  |
| 5337 | PLD1     | 0.05  | 0.00  | 0.03  | 0.00  |
| 5338 | PLD2     | -0.04 | 0.00  | 0.00  | 0.01  |
| 5339 | PLEC1    | 0.16  | 0.00  | 0.35  | 0.30  |
| 5340 | PLG      | -0.02 | 0.00  | -0.05 | -0.18 |
| 5341 | PLEK     | 0.00  | 0.00  | 0.00  | NaN   |
| 5345 | SERPINF2 | -0.05 | 0.00  | 0.00  | 0.08  |
| 5346 | PLIN     | 0.02  | 0.00  | -0.05 | 0.04  |
| 5348 | FXYD1    | 0.00  | 0.00  | 0.08  | 0.07  |
| 5349 | FXYD3    | 0.00  | 0.00  | 0.08  | 0.13  |
| 5352 | PLOD2    | 0.02  | 0.00  | 0.00  | 0.18  |
| 5355 | PLP2     | -0.04 | 0.00  | -0.05 | 0.39  |
| 5357 | PLS1     | 0.02  | 0.00  | 0.03  | 0.25  |
| 5358 | PLS3     | -0.05 | 0.00  | -0.05 | 0.11  |
| 5359 | PLSCR1   | 0.02  | 0.00  | 0.00  | 0.30  |
| 5360 | PLTP     | 0.04  | 0.00  | 0.03  | 0.07  |
| 5361 | PLXNA1   | 0.00  | 0.00  | -0.03 | 0.06  |
| 5362 | PLXNA2   | 0.07  | 0.00  | 0.00  | 0.02  |
| 5364 | PLXNB1   | -0.04 | 0.00  | 0.00  | -0.07 |
| 5365 | PLXNB3   | 0.00  | 0.00  | -0.03 | 0.03  |
| 5366 | PMAIP1   | -0.02 | -0.09 | -0.03 | 0.03  |
| 5367 | PMCH     | 0.00  | 0.09  | 0.03  | -0.04 |
| 5368 | PNOC     | -0.13 | 0.00  | -0.19 | -0.03 |
| 5371 | PML      | 0.00  | 0.00  | 0.00  | NaN   |
| 5372 | PMM1     | -0.02 | 0.00  | -0.03 | 0.15  |
| 5373 | PMM2     | 0.04  | 0.00  | 0.00  | 0.10  |
| 5375 | PMP2     | 0.13  | 0.00  | 0.14  | 0.07  |
| 5376 | PMP22    | -0.07 | 0.00  | -0.03 | -0.12 |
| 5378 | PMS1     | 0.00  | 0.00  | 0.00  | NaN   |
| 5395 | PMS2     | 0.00  | 0.00  | 0.00  | NaN   |
| 5406 | PNLIP    | -0.04 | 0.00  | 0.03  | 0.09  |
| 5407 | PNLIPRP1 | -0.04 | 0.00  | 0.03  | 0.09  |
| 5408 | PNLIPRP2 | -0.04 | 0.00  | 0.00  | 0.08  |
| 5409 | PNMT     | 0.02  | 0.91  | 0.05  | 0.52  |
| 5411 | PNN      | 0.00  | 0.00  | -0.03 | 0.20  |
| 5412 | UBL3     | -0.05 | 0.00  | -0.05 | 0.19  |
| 5420 | PODXL    | 0.02  | 0.00  | 0.00  | 0.08  |
| 5423 | POLB     | 0.02  | 0.09  | 0.11  | 0.27  |
| 5424 | POLD1    | 0.00  | 0.00  | -0.03 | -0.12 |
| 5425 | POLD2    | -0.02 | 0.00  | 0.05  | 0.14  |
| 5426 | POLE     | 0.00  | 0.00  | 0.00  | NaN   |
| 5427 | POLE2    | 0.02  | 0.00  | 0.00  | 0.14  |
| 5428 | POLG     | 0.02  | 0.00  | -0.05 | 0.16  |
| 5429 | POLH     | 0.00  | 0.00  | 0.11  | 0.21  |

|      |         |       |       |       |       |
|------|---------|-------|-------|-------|-------|
| 5430 | POLR2A  | -0.05 | 0.00  | 0.00  | 0.11  |
| 5431 | POLR2B  | -0.02 | 0.00  | 0.00  | 0.06  |
| 5432 | POLR2C  | -0.05 | 0.00  | 0.00  | 0.35  |
| 5433 | POLR2D  | -0.02 | 0.00  | 0.00  | 0.34  |
| 5434 | POLR2E  | 0.00  | 0.00  | -0.03 | 0.08  |
| 5435 | POLR2F  | -0.04 | 0.00  | 0.03  | -0.07 |
| 5436 | POLR2G  | 0.00  | 0.00  | 0.03  | 0.26  |
| 5437 | POLR2H  | 0.05  | 0.00  | 0.05  | 0.17  |
| 5438 | POLR2I  | -0.02 | 0.09  | 0.08  | 0.12  |
| 5439 | POLR2J  | 0.02  | 0.00  | 0.00  | 0.13  |
| 5440 | POLR2K  | 0.18  | 0.18  | 0.27  | 0.22  |
| 5441 | POLR2L  | 0.00  | 0.00  | 0.00  | NaN   |
| 5442 | POLRMT  | 0.00  | 0.00  | -0.03 | 0.06  |
| 5443 | POMC    | -0.02 | 0.00  | 0.00  | 0.04  |
| 5444 | PON1    | 0.02  | 0.00  | -0.03 | 0.03  |
| 5445 | PON2    | 0.02  | 0.00  | -0.03 | 0.07  |
| 5446 | PON3    | 0.02  | 0.00  | -0.03 | 0.01  |
| 5447 | POR     | 0.00  | 0.09  | 0.11  | 0.11  |
| 5449 | POU1F1  | -0.05 | 0.00  | 0.00  | -0.02 |
| 5450 | POU2AF1 | -0.07 | 0.00  | 0.00  | 0.23  |
| 5451 | POU2F1  | 0.02  | 0.00  | 0.05  | 0.07  |
| 5452 | POU2F2  | 0.02  | 0.00  | -0.03 | 0.13  |
| 5454 | POU3F2  | -0.02 | 0.00  | 0.00  | 0.07  |
| 5456 | POU3F4  | -0.05 | 0.00  | -0.08 | -0.24 |
| 5457 | POU4F1  | -0.04 | -0.09 | -0.14 | 0.17  |
| 5458 | POU4F2  | 0.00  | 0.00  | -0.03 | -0.01 |
| 5459 | POU4F3  | 0.00  | 0.00  | 0.00  | NaN   |
| 5460 | POU5F1  | 0.00  | 0.00  | 0.05  | 0.25  |
| 5463 | POU6F1  | 0.02  | 0.00  | -0.03 | 0.05  |
| 5465 | PPARA   | -0.02 | 0.00  | -0.03 | 0.14  |
| 5467 | PPARD   | 0.00  | 0.00  | 0.05  | 0.14  |
| 5468 | PPARG   | 0.02  | 0.00  | 0.00  | 0.12  |
| 5469 | PPARBP  | 0.00  | 0.55  | 0.05  | 0.64  |
| 5470 | PPEF2   | -0.02 | 0.00  | 0.00  | -0.10 |
| 5471 | PPAT    | -0.02 | 0.00  | 0.00  | 0.11  |
| 5473 | PPBP    | -0.02 | 0.00  | 0.00  | 0.06  |
| 5475 | PPEF1   | -0.05 | -0.09 | -0.11 | 0.03  |
| 5478 | PPIA    | -0.02 | 0.00  | 0.08  | 0.33  |
| 5479 | PPIB    | 0.00  | 0.09  | -0.08 | 0.16  |
| 5480 | PPIC    | 0.00  | 0.00  | -0.03 | 0.21  |
| 5481 | PPID    | -0.02 | 0.00  | -0.05 | 0.31  |
| 5493 | PPL     | 0.04  | 0.00  | 0.00  | 0.09  |
| 5494 | PPM1A   | 0.00  | 0.00  | -0.03 | 0.17  |
| 5495 | PPM1B   | 0.00  | 0.00  | 0.00  | NaN   |
| 5496 | PPM1G   | 0.00  | 0.00  | 0.00  | NaN   |
| 5498 | PPOX    | 0.11  | 0.00  | 0.14  | 0.47  |
| 5500 | PPP1CB  | 0.00  | 0.00  | 0.00  | NaN   |

|      |         |       |       |       |       |
|------|---------|-------|-------|-------|-------|
| 5501 | PPP1CC  | 0.00  | 0.00  | 0.00  | NaN   |
| 5502 | PPP1R1A | 0.00  | 0.00  | -0.03 | 0.08  |
| 5504 | PPP1R2  | 0.02  | 0.09  | 0.00  | 0.29  |
| 5506 | PPP1R3A | 0.00  | 0.00  | -0.03 | 0.15  |
| 5507 | PPP1R3C | -0.02 | 0.00  | -0.05 | 0.15  |
| 5509 | PPP1R3D | 0.05  | 0.09  | 0.00  | 0.30  |
| 5510 | PPP1R7  | 0.00  | 0.00  | 0.00  | NaN   |
| 5511 | PPP1R8  | -0.02 | 0.00  | 0.00  | -0.01 |
| 5514 | PPP1R10 | 0.00  | 0.00  | 0.05  | 0.11  |
| 5516 | PPP2CB  | -0.09 | -0.18 | -0.19 | 0.24  |
| 5518 | PPP2R1A | 0.00  | -0.09 | -0.03 | 0.01  |
| 5519 | PPP2R1B | -0.07 | 0.00  | 0.00  | 0.24  |
| 5520 | PPP2R2A | -0.11 | -0.18 | -0.19 | 0.22  |
| 5521 | PPP2R2B | 0.00  | 0.00  | 0.00  | NaN   |
| 5523 | PPP2R3A | 0.00  | 0.00  | 0.00  | NaN   |
| 5524 | PPP2R4  | 0.02  | 0.00  | 0.00  | 0.21  |
| 5525 | PPP2R5A | 0.07  | 0.00  | 0.00  | 0.19  |
| 5526 | PPP2R5B | 0.02  | 0.00  | 0.03  | 0.11  |
| 5527 | PPP2R5C | 0.00  | 0.00  | -0.03 | 0.02  |
| 5528 | PPP2R5D | 0.00  | 0.00  | 0.08  | 0.28  |
| 5529 | PPP2R5E | -0.02 | 0.00  | 0.00  | 0.07  |
| 5530 | PPP3CA  | -0.04 | 0.00  | 0.00  | 0.08  |
| 5532 | PPP3CB  | -0.02 | 0.00  | 0.00  | 0.29  |
| 5533 | PPP3CC  | -0.13 | -0.18 | -0.22 | 0.30  |
| 5534 | PPP3R1  | 0.02  | 0.00  | 0.00  | 0.12  |
| 5536 | PPP5C   | -0.02 | 0.00  | -0.03 | 0.04  |
| 5537 | PPP6C   | -0.02 | 0.00  | 0.00  | 0.06  |
| 5538 | PPT1    | -0.02 | 0.00  | 0.00  | -0.11 |
| 5544 | PRB3    | 0.00  | -0.18 | 0.05  | 0.11  |
| 5546 | PRCC    | 0.04  | 0.00  | 0.11  | 0.26  |
| 5547 | PRCP    | 0.00  | 0.00  | 0.00  | 0.26  |
| 5550 | PREP    | 0.04  | 0.09  | -0.03 | 0.34  |
| 5551 | PRF1    | -0.02 | 0.00  | -0.03 | 0.13  |
| 5552 | PRG1    | -0.02 | 0.00  | 0.03  | 0.09  |
| 5553 | PRG2    | 0.02  | 0.00  | 0.05  | 0.10  |
| 5554 | PRH1    | 0.00  | -0.18 | 0.08  | 0.12  |
| 5557 | PRIM1   | 0.00  | 0.00  | 0.00  | NaN   |
| 5558 | PRIM2A  | -0.04 | 0.00  | 0.11  | 0.19  |
| 5563 | PRKAA2  | 0.00  | 0.00  | 0.00  | -0.16 |
| 5564 | PRKAB1  | 0.00  | 0.00  | 0.00  | NaN   |
| 5565 | PRKAB2  | 0.07  | 0.00  | 0.14  | 0.16  |
| 5566 | PRKACA  | 0.02  | -0.09 | 0.00  | 0.15  |
| 5567 | PRKACB  | -0.02 | 0.00  | -0.03 | -0.02 |
| 5568 | PRKACG  | -0.02 | 0.00  | -0.03 | 0.07  |
| 5569 | PKIA    | 0.11  | 0.09  | 0.11  | 0.19  |
| 5571 | PRKAG1  | 0.00  | 0.00  | 0.00  | NaN   |
| 5573 | PRKAR1A | 0.11  | 0.18  | 0.03  | 0.45  |



|      |         |       |       |       |       |
|------|---------|-------|-------|-------|-------|
| 5576 | PRKAR2A | -0.04 | 0.00  | 0.00  | 0.15  |
| 5577 | PRKAR2B | 0.02  | 0.00  | -0.03 | 0.03  |
| 5578 | PRKCA   | 0.11  | 0.18  | 0.03  | 0.06  |
| 5579 | PRKCB1  | 0.02  | 0.00  | 0.00  | -0.13 |
| 5580 | PRKCD   | -0.02 | 0.00  | 0.00  | 0.06  |
| 5581 | PRKCE   | 0.00  | 0.00  | 0.00  | NaN   |
| 5582 | PRKCG   | 0.00  | 0.09  | 0.00  | -0.13 |
| 5583 | PRKCH   | 0.00  | 0.00  | 0.00  | 0.04  |
| 5584 | PRKCI   | 0.05  | 0.00  | 0.05  | 0.51  |
| 5588 | PRKCQ   | 0.00  | 0.00  | 0.11  | 0.14  |
| 5589 | PRKCSH  | 0.00  | 0.00  | 0.00  | NaN   |
| 5590 | PRKCZ   | -0.02 | 0.00  | 0.03  | -0.20 |
| 5591 | PRKDC   | 0.11  | 0.00  | 0.16  | 0.36  |
| 5592 | PRKG1   | -0.04 | 0.00  | -0.03 | 0.15  |
| 5593 | PRKG2   | -0.04 | 0.00  | -0.03 | 0.12  |
| 5594 | MAPK1   | 0.00  | 0.00  | 0.03  | 0.08  |
| 5596 | MAPK4   | -0.02 | -0.09 | -0.05 | 0.13  |
| 5597 | MAPK6   | -0.02 | 0.00  | -0.05 | 0.18  |
| 5598 | MAPK7   | -0.04 | 0.09  | 0.03  | 0.43  |
| 5599 | MAPK8   | -0.02 | 0.00  | -0.03 | 0.12  |
| 5600 | MAPK11  | 0.00  | 0.09  | 0.03  | 0.06  |
| 5601 | MAPK9   | 0.00  | 0.00  | -0.03 | 0.42  |
| 5602 | MAPK10  | -0.04 | 0.00  | -0.03 | 0.02  |
| 5603 | MAPK13  | 0.02  | 0.00  | 0.05  | -0.04 |
| 5604 | MAP2K1  | 0.00  | 0.09  | -0.05 | -0.02 |
| 5605 | MAP2K2  | 0.00  | 0.00  | 0.00  | NaN   |
| 5606 | MAP2K3  | -0.04 | 0.18  | 0.00  | 0.47  |
| 5607 | MAP2K5  | 0.00  | 0.00  | -0.05 | 0.08  |
| 5608 | MAP2K6  | 0.04  | 0.27  | 0.03  | 0.03  |
| 5609 | MAP2K7  | 0.00  | -0.09 | 0.00  | 0.11  |
| 5611 | DNAJC3  | -0.02 | 0.00  | -0.05 | -0.04 |
| 5612 | PRKRIR  | 0.04  | 0.09  | -0.03 | 0.49  |
| 5613 | PRKX    | -0.05 | -0.09 | -0.08 | 0.14  |
| 5616 | PRKY    | 0.00  | 0.00  | -0.03 | 0.04  |
| 5617 | PRL     | 0.00  | 0.00  | 0.05  | 0.17  |
| 5618 | PRLR    | 0.02  | 0.27  | 0.00  | 0.26  |
| 5619 | PRM1    | 0.04  | 0.00  | 0.00  | -0.07 |
| 5620 | PRM2    | 0.04  | 0.00  | 0.00  | -0.10 |
| 5621 | PRNP    | 0.02  | 0.00  | -0.03 | 0.17  |
| 5624 | PROC    | -0.02 | 0.00  | 0.00  | 0.02  |
| 5625 | PRODH   | -0.02 | 0.00  | 0.03  | 0.21  |
| 5626 | PROP1   | 0.00  | 0.00  | 0.00  | NaN   |
| 5627 | PROS1   | -0.02 | 0.00  | -0.05 | -0.17 |
| 5629 | PROX1   | 0.07  | 0.00  | 0.00  | 0.01  |
| 5630 | PRPH    | 0.00  | 0.00  | -0.03 | -0.08 |
| 5631 | PRPS1   | -0.05 | 0.09  | -0.08 | 0.24  |
| 5634 | PRPS2   | -0.05 | -0.09 | -0.14 | -0.06 |

|      |         |       |       |       |       |
|------|---------|-------|-------|-------|-------|
| 5635 | PRPSAP1 | 0.04  | 0.27  | 0.03  | 0.20  |
| 5636 | PRPSAP2 | -0.05 | 0.00  | 0.00  | 0.10  |
| 5638 | PRRG1   | -0.05 | 0.00  | -0.11 | -0.09 |
| 5639 | PRRG2   | 0.02  | 0.00  | -0.03 | -0.23 |
| 5641 | LGMN    | -0.02 | 0.00  | 0.03  | 0.16  |
| 5648 | MASP1   | 0.04  | 0.00  | 0.03  | 0.05  |
| 5649 | RELN    | 0.02  | 0.00  | 0.00  | 0.09  |
| 5650 | KLK7    | 0.00  | 0.00  | -0.03 | 0.09  |
| 5651 | PRSS7   | -0.04 | -0.18 | 0.05  | -0.06 |
| 5652 | PRSS8   | 0.04  | 0.09  | 0.00  | 0.34  |
| 5653 | KLK6    | 0.00  | 0.00  | -0.03 | -0.17 |
| 5655 | KLK10   | 0.00  | 0.00  | -0.03 | -0.04 |
| 5657 | PRTN3   | 0.00  | 0.00  | -0.03 | 0.18  |
| 5660 | PSAP    | -0.02 | 0.00  | -0.03 | 0.14  |
| 5662 | PSD     | 0.00  | 0.00  | -0.03 | 0.00  |
| 5663 | PSEN1   | -0.02 | 0.00  | -0.03 | 0.41  |
| 5664 | PSEN2   | 0.07  | 0.00  | 0.03  | 0.28  |
| 5682 | PSMA1   | -0.02 | 0.00  | -0.05 | 0.02  |
| 5683 | PSMA2   | -0.02 | 0.00  | 0.05  | 0.29  |
| 5684 | PSMA3   | 0.00  | 0.00  | -0.03 | 0.23  |
| 5685 | PSMA4   | 0.00  | 0.00  | -0.03 | -0.04 |
| 5686 | PSMA5   | 0.00  | 0.00  | -0.03 | -0.07 |
| 5687 | PSMA6   | 0.02  | 0.09  | 0.00  | 0.41  |
| 5688 | PSMA7   | 0.04  | 0.09  | 0.05  | 0.24  |
| 5689 | PSMB1   | -0.02 | 0.00  | -0.03 | 0.19  |
| 5690 | PSMB2   | -0.02 | 0.00  | 0.00  | 0.09  |
| 5691 | PSMB3   | 0.00  | 0.45  | 0.05  | 0.63  |
| 5692 | PSMB4   | 0.07  | 0.09  | 0.19  | 0.19  |
| 5693 | PSMB5   | -0.02 | 0.00  | 0.00  | 0.03  |
| 5694 | PSMB6   | -0.04 | 0.00  | 0.00  | 0.20  |
| 5695 | PSMB7   | -0.02 | 0.00  | 0.00  | 0.06  |
| 5696 | PSMB8   | 0.00  | 0.00  | 0.05  | 0.09  |
| 5698 | PSMB9   | 0.00  | 0.00  | 0.05  | 0.07  |
| 5699 | PSMB10  | -0.04 | 0.00  | 0.00  | 0.03  |
| 5700 | PSMC1   | -0.02 | 0.00  | 0.03  | 0.61  |
| 5702 | PSMC3   | -0.02 | 0.00  | -0.03 | 0.18  |
| 5704 | PSMC4   | 0.02  | 0.00  | 0.05  | 0.11  |
| 5705 | PSMC5   | 0.16  | 0.27  | 0.03  | 0.48  |
| 5706 | PSMC6   | 0.00  | 0.00  | 0.00  | 0.15  |
| 5707 | PSMD1   | 0.00  | 0.00  | 0.00  | NaN   |
| 5708 | PSMD2   | 0.05  | 0.00  | 0.05  | 0.17  |
| 5709 | PSMD3   | 0.04  | 0.55  | 0.05  | 0.70  |
| 5710 | PSMD4   | 0.07  | 0.09  | 0.19  | 0.25  |
| 5711 | PSMD5   | -0.02 | 0.00  | 0.00  | 0.02  |
| 5713 | PSMD7   | -0.09 | 0.00  | 0.00  | 0.11  |
| 5714 | PSMD8   | 0.02  | 0.09  | 0.05  | 0.21  |
| 5715 | PSMD9   | 0.02  | 0.00  | 0.00  | 0.09  |

|      |        |       |       |       |       |
|------|--------|-------|-------|-------|-------|
| 5716 | PSMD10 | -0.05 | 0.00  | -0.08 | 0.11  |
| 5717 | PSMD11 | 0.00  | 0.36  | 0.00  | 0.53  |
| 5718 | PSMD12 | 0.11  | 0.27  | 0.03  | 0.65  |
| 5719 | PSMD13 | 0.00  | 0.00  | 0.00  | NaN   |
| 5720 | PSME1  | -0.02 | 0.00  | 0.00  | 0.08  |
| 5721 | PSME2  | -0.02 | 0.00  | 0.00  | 0.14  |
| 5723 | PSPH   | 0.00  | 0.00  | 0.05  | 0.43  |
| 5724 | PTAFR  | -0.02 | 0.09  | 0.00  | -0.05 |
| 5725 | PTBP1  | 0.00  | 0.00  | -0.03 | 0.03  |
| 5728 | PTEN   | -0.04 | 0.00  | -0.11 | 0.42  |
| 5729 | PTGDR  | 0.02  | 0.00  | 0.00  | 0.03  |
| 5730 | PTGDS  | 0.02  | 0.00  | 0.03  | 0.01  |
| 5731 | PTGER1 | 0.02  | -0.09 | 0.00  | 0.10  |
| 5732 | PTGER2 | 0.02  | 0.00  | 0.00  | 0.15  |
| 5733 | PTGER3 | -0.02 | 0.00  | -0.03 | 0.11  |
| 5734 | PTGER4 | 0.04  | 0.18  | 0.00  | -0.04 |
| 5737 | PTGFR  | -0.02 | 0.00  | -0.03 | 0.07  |
| 5739 | PTGIR  | -0.02 | 0.00  | -0.03 | 0.06  |
| 5740 | PTGIS  | 0.05  | 0.00  | 0.05  | 0.13  |
| 5741 | PTH    | -0.02 | 0.00  | -0.05 | 0.13  |
| 5742 | PTGS1  | -0.02 | 0.00  | 0.00  | 0.06  |
| 5743 | PTGS2  | 0.04  | 0.09  | 0.03  | -0.01 |
| 5744 | PTHLH  | -0.02 | -0.09 | 0.05  | 0.08  |
| 5745 | PTHR1  | -0.04 | 0.00  | 0.00  | 0.09  |
| 5746 | PTHR2  | 0.00  | 0.00  | 0.00  | NaN   |
| 5747 | PTK2   | 0.16  | 0.00  | 0.38  | 0.37  |
| 5753 | PTK6   | 0.05  | 0.09  | 0.08  | 0.11  |
| 5754 | PTK7   | 0.00  | 0.00  | 0.08  | 0.26  |
| 5757 | PTMA   | 0.00  | 0.00  | 0.00  | NaN   |
| 5763 | PTMS   | -0.02 | 0.09  | 0.05  | 0.10  |
| 5764 | PTN    | 0.02  | 0.00  | 0.03  | 0.11  |
| 5768 | QSCN6  | 0.04  | 0.00  | 0.03  | 0.11  |
| 5770 | PTPN1  | 0.07  | 0.09  | 0.05  | 0.37  |
| 5771 | PTPN2  | -0.02 | -0.09 | 0.00  | 0.03  |
| 5774 | PTPN3  | -0.02 | 0.00  | 0.00  | 0.05  |
| 5775 | PTPN4  | 0.00  | 0.00  | 0.00  | NaN   |
| 5777 | PTPN6  | -0.02 | 0.09  | 0.05  | 0.08  |
| 5778 | PTPN7  | 0.09  | 0.00  | 0.05  | -0.08 |
| 5780 | PTPN9  | 0.00  | 0.00  | 0.00  | NaN   |
| 5781 | PTPN11 | 0.00  | 0.00  | 0.00  | NaN   |
| 5782 | PTPN12 | 0.02  | 0.00  | 0.03  | 0.15  |
| 5783 | PTPN13 | -0.04 | 0.00  | -0.03 | -0.10 |
| 5784 | PTPN14 | 0.07  | 0.00  | 0.00  | 0.03  |
| 5786 | PTPRA  | 0.02  | 0.00  | -0.03 | 0.17  |
| 5787 | PTPRB  | 0.02  | 0.00  | 0.03  | 0.15  |
| 5788 | PTPRC  | 0.09  | 0.00  | 0.03  | -0.14 |
| 5789 | PTPRD  | -0.07 | 0.00  | -0.05 | 0.02  |

|      |         |       |       |       |       |
|------|---------|-------|-------|-------|-------|
| 5790 | PTPRCAP | 0.07  | 0.18  | 0.05  | 0.14  |
| 5791 | PTPRE   | -0.04 | 0.00  | 0.00  | 0.22  |
| 5792 | PTPRF   | 0.00  | 0.00  | 0.03  | 0.19  |
| 5793 | PTPRG   | -0.05 | 0.00  | 0.00  | -0.01 |
| 5794 | PTPRH   | 0.00  | 0.09  | -0.03 | -0.18 |
| 5795 | PTPRJ   | -0.02 | 0.00  | 0.00  | 0.13  |
| 5796 | PTPRK   | -0.02 | 0.00  | 0.03  | 0.11  |
| 5797 | PTPRM   | 0.00  | -0.09 | 0.00  | 0.01  |
| 5798 | PTPRN   | 0.00  | 0.00  | 0.00  | NaN   |
| 5799 | PTPRN2  | 0.02  | 0.09  | -0.03 | 0.23  |
| 5801 | PTPRR   | 0.02  | 0.00  | 0.03  | 0.15  |
| 5802 | PTPRS   | -0.02 | 0.00  | 0.00  | -0.09 |
| 5803 | PTPRZ1  | 0.00  | 0.00  | -0.03 | 0.00  |
| 5805 | PTS     | -0.07 | 0.00  | 0.00  | 0.08  |
| 5810 | RAD1    | 0.02  | 0.27  | 0.00  | 0.52  |
| 5813 | PURA    | 0.00  | 0.00  | 0.00  | NaN   |
| 5816 | PVALB   | -0.04 | 0.00  | 0.03  | 0.08  |
| 5817 | PVR     | -0.02 | 0.00  | -0.03 | 0.19  |
| 5818 | PVRL1   | -0.07 | 0.00  | 0.00  | 0.11  |
| 5819 | PVRL2   | -0.02 | 0.00  | -0.03 | -0.08 |
| 5825 | ABCD3   | -0.02 | 0.00  | 0.00  | 0.15  |
| 5826 | ABCD4   | -0.02 | 0.00  | 0.00  | 0.08  |
| 5827 | PXMP2   | 0.00  | 0.00  | 0.00  | NaN   |
| 5828 | PXMP3   | 0.09  | 0.09  | 0.08  | 0.16  |
| 5829 | PXN     | 0.02  | 0.00  | 0.00  | 0.41  |
| 5833 | PCYT2   | 0.00  | 0.09  | 0.08  | -0.09 |
| 5834 | PYGB    | 0.02  | 0.00  | -0.03 | 0.00  |
| 5836 | PYGL    | 0.02  | 0.00  | 0.00  | 0.01  |
| 5837 | PYGM    | 0.00  | -0.09 | 0.03  | 0.05  |
| 5858 | PZP     | 0.00  | -0.18 | 0.05  | 0.11  |
| 5859 | QARS    | 0.00  | 0.00  | 0.00  | NaN   |
| 5860 | QDPR    | -0.04 | -0.09 | -0.05 | 0.20  |
| 5861 | RAB1A   | 0.00  | 0.00  | 0.00  | NaN   |
| 5862 | RAB2    | 0.16  | 0.00  | 0.14  | 0.41  |
| 5864 | RAB3A   | 0.02  | 0.00  | 0.00  | -0.01 |
| 5865 | RAB3B   | 0.00  | 0.00  | -0.03 | -0.06 |
| 5866 | RAB3IL1 | -0.04 | 0.00  | 0.03  | 0.07  |
| 5867 | RAB4A   | 0.07  | 0.00  | 0.03  | 0.29  |
| 5868 | RAB5A   | -0.05 | 0.00  | -0.05 | 0.32  |
| 5869 | RAB5B   | 0.04  | 0.00  | 0.00  | 0.16  |
| 5870 | RAB6A   | 0.05  | 0.09  | -0.03 | 0.40  |
| 5871 | MAP4K2  | 0.00  | -0.09 | 0.03  | 0.07  |
| 5872 | RAB13   | 0.05  | 0.00  | 0.14  | 0.06  |
| 5873 | RAB27A  | -0.02 | 0.00  | -0.05 | 0.20  |
| 5874 | RAB27B  | -0.02 | -0.09 | -0.03 | 0.25  |
| 5875 | RABGGTA | -0.02 | 0.00  | 0.00  | 0.03  |
| 5876 | RABGGTB | -0.02 | 0.00  | -0.03 | 0.16  |

|      |          |       |       |       |       |
|------|----------|-------|-------|-------|-------|
| 5877 | RABIF    | 0.13  | 0.00  | 0.05  | 0.29  |
| 5878 | RAB5C    | -0.04 | 0.09  | 0.00  | 0.21  |
| 5879 | RAC1     | 0.00  | 0.00  | 0.00  | NaN   |
| 5880 | RAC2     | -0.04 | 0.00  | 0.03  | -0.07 |
| 5881 | RAC3     | 0.00  | 0.09  | 0.08  | -0.09 |
| 5884 | RAD17    | 0.00  | 0.00  | -0.08 | 0.17  |
| 5885 | RAD21    | 0.22  | 0.27  | 0.35  | 0.42  |
| 5886 | RAD23A   | 0.00  | -0.09 | 0.00  | 0.10  |
| 5887 | RAD23B   | -0.02 | 0.00  | 0.00  | 0.03  |
| 5888 | RAD51    | -0.02 | 0.00  | -0.14 | 0.13  |
| 5889 | RAD51C   | 0.18  | 0.00  | 0.03  | 0.38  |
| 5890 | RAD51L1  | -0.02 | 0.00  | 0.00  | 0.10  |
| 5891 | RAGE     | 0.00  | 0.00  | -0.03 | 0.07  |
| 5892 | RAD51L3  | -0.02 | 0.09  | 0.03  | 0.35  |
| 5893 | RAD52    | 0.00  | 0.09  | 0.08  | 0.24  |
| 5894 | RAF1     | 0.02  | 0.00  | 0.00  | 0.26  |
| 5896 | RAG1     | 0.04  | 0.00  | -0.03 | 0.23  |
| 5897 | RAG2     | 0.04  | 0.00  | -0.03 | 0.09  |
| 5898 | RALA     | -0.02 | 0.00  | 0.03  | 0.25  |
| 5899 | RALB     | 0.02  | 0.00  | 0.00  | 0.08  |
| 5900 | RALGDS   | 0.02  | 0.00  | 0.00  | 0.17  |
| 5901 | RAN      | 0.00  | 0.00  | 0.00  | NaN   |
| 5902 | RANBP1   | -0.02 | 0.00  | 0.08  | 0.21  |
| 5903 | RANBP2   | 0.00  | 0.00  | 0.00  | NaN   |
| 5905 | RANGAP1  | -0.02 | 0.00  | -0.03 | 0.21  |
| 5906 | RAP1A    | 0.02  | 0.00  | -0.03 | -0.01 |
| 5908 | RAP1B    | 0.02  | 0.09  | 0.00  | 0.18  |
| 5910 | RAP1GDS1 | -0.04 | 0.00  | 0.03  | 0.06  |
| 5911 | RAP2A    | -0.02 | 0.09  | -0.05 | 0.16  |
| 5912 | RAP2B    | 0.02  | 0.00  | 0.03  | 0.16  |
| 5913 | RAPSN    | -0.02 | 0.00  | -0.03 | -0.22 |
| 5914 | RARA     | 0.02  | 0.09  | 0.03  | 0.35  |
| 5915 | RARB     | -0.04 | 0.00  | -0.05 | 0.05  |
| 5917 | RARS     | 0.00  | 0.00  | 0.00  | 0.25  |
| 5918 | RARRES1  | 0.02  | 0.00  | 0.03  | 0.13  |
| 5919 | RARRES2  | 0.02  | 0.00  | 0.00  | -0.20 |
| 5920 | RARRES3  | 0.00  | 0.00  | 0.03  | -0.13 |
| 5921 | RASA1    | 0.00  | 0.00  | -0.14 | 0.18  |
| 5922 | RASA2    | 0.02  | 0.00  | 0.03  | 0.14  |
| 5923 | RASGRF1  | 0.00  | 0.00  | -0.03 | -0.11 |
| 5925 | RB1      | -0.09 | 0.00  | -0.16 | 0.13  |
| 5928 | RBBP4    | 0.00  | 0.00  | 0.00  | NaN   |
| 5929 | RBBP5    | 0.07  | 0.00  | 0.03  | 0.21  |
| 5930 | RBBP6    | 0.02  | 0.00  | 0.00  | 0.19  |
| 5931 | RBBP7    | -0.05 | 0.00  | -0.11 | 0.28  |
| 5932 | RBBP8    | 0.00  | -0.09 | 0.03  | 0.20  |
| 5934 | RBL2     | -0.05 | 0.00  | 0.00  | 0.19  |

|      |       |       |       |       |       |
|------|-------|-------|-------|-------|-------|
| 5935 | RBM3  | -0.04 | 0.00  | -0.05 | 0.27  |
| 5936 | RBM4  | 0.07  | 0.00  | 0.03  | 0.17  |
| 5937 | RBMS1 | 0.00  | 0.00  | 0.03  | 0.24  |
| 5939 | RBMS2 | 0.00  | 0.00  | 0.00  | NaN   |
| 5947 | RBP1  | 0.02  | 0.00  | 0.00  | 0.34  |
| 5949 | RBP3  | -0.02 | 0.00  | 0.00  | 0.05  |
| 5950 | RBP4  | -0.02 | 0.00  | -0.05 | 0.18  |
| 5954 | RCN1  | 0.04  | 0.00  | -0.03 | 0.28  |
| 5955 | RCN2  | 0.00  | 0.00  | -0.11 | 0.25  |
| 5959 | RDH5  | 0.02  | 0.00  | 0.00  | 0.14  |
| 5962 | RDX   | -0.07 | -0.09 | 0.00  | 0.30  |
| 5965 | RECQL | 0.00  | -0.09 | 0.05  | 0.25  |
| 5966 | REL   | 0.02  | 0.00  | 0.00  | 0.02  |
| 5967 | REG1A | 0.00  | 0.00  | 0.00  | NaN   |
| 5968 | REG1B | 0.00  | 0.00  | 0.00  | NaN   |
| 5970 | RELA  | 0.02  | 0.00  | 0.05  | 0.17  |
| 5971 | RELB  | -0.02 | 0.00  | -0.03 | 0.18  |
| 5972 | REN   | 0.07  | 0.00  | 0.05  | -0.06 |
| 5973 | RENBP | 0.00  | 0.00  | -0.03 | -0.11 |
| 5978 | REST  | -0.02 | 0.00  | 0.00  | 0.09  |
| 5979 | RET   | 0.00  | 0.09  | -0.03 | 0.12  |
| 5980 | REV3L | 0.02  | 0.00  | 0.05  | 0.24  |
| 5981 | RFC1  | -0.05 | 0.00  | -0.03 | 0.10  |
| 5982 | RFC2  | 0.02  | 0.00  | 0.05  | 0.08  |
| 5983 | RFC3  | -0.05 | 0.00  | -0.08 | 0.14  |
| 5984 | RFC4  | 0.04  | 0.00  | 0.03  | 0.32  |
| 5985 | RFC5  | 0.00  | 0.00  | -0.03 | 0.06  |
| 5988 | RFPL1 | 0.00  | 0.00  | 0.03  | 0.17  |
| 5989 | RFX1  | 0.02  | -0.09 | 0.00  | 0.00  |
| 5990 | RFX2  | 0.00  | -0.09 | 0.00  | -0.01 |
| 5991 | RFX3  | -0.05 | 0.00  | -0.08 | 0.08  |
| 5992 | RFX4  | 0.00  | 0.00  | 0.00  | NaN   |
| 5993 | RFX5  | 0.07  | 0.09  | 0.19  | 0.07  |
| 5994 | RFXAP | -0.05 | 0.00  | -0.11 | -0.01 |
| 5995 | RGR   | -0.02 | 0.00  | -0.05 | -0.11 |
| 5996 | RGS1  | 0.07  | 0.00  | 0.03  | 0.06  |
| 5997 | RGS2  | 0.07  | 0.00  | 0.03  | -0.16 |
| 5998 | RGS3  | -0.02 | 0.00  | 0.00  | 0.04  |
| 5999 | RGS4  | 0.05  | 0.00  | 0.14  | 0.20  |
| 6000 | RGS7  | 0.07  | 0.00  | 0.05  | 0.12  |
| 6001 | RGS10 | -0.04 | 0.00  | -0.03 | 0.05  |
| 6002 | RGS12 | -0.02 | 0.00  | 0.00  | 0.13  |
| 6003 | RGS13 | 0.07  | 0.00  | 0.03  | -0.06 |
| 6004 | RGS16 | 0.04  | 0.00  | 0.03  | 0.01  |
| 6005 | RHAG  | 0.00  | 0.00  | 0.08  | -0.02 |
| 6010 | RHO   | 0.00  | 0.00  | -0.03 | 0.22  |
| 6013 | RLN1  | -0.05 | 0.00  | -0.05 | 0.00  |

|      |         |       |       |       |       |
|------|---------|-------|-------|-------|-------|
| 6015 | RING1   | 0.00  | 0.00  | 0.05  | 0.20  |
| 6017 | RLBP1   | 0.02  | 0.00  | -0.05 | 0.05  |
| 6018 | RLF     | -0.02 | 0.00  | 0.00  | 0.10  |
| 6019 | RLN2    | -0.05 | 0.00  | -0.05 | 0.04  |
| 6036 | RNASE2  | -0.02 | 0.00  | -0.03 | 0.12  |
| 6037 | RNASE3  | -0.02 | 0.00  | -0.03 | -0.03 |
| 6038 | RNASE4  | -0.02 | 0.00  | -0.03 | 0.11  |
| 6039 | RNASE6  | -0.02 | 0.00  | -0.03 | 0.29  |
| 6040 | RNASEH1 | -0.02 | 0.00  | 0.00  | 0.10  |
| 6041 | RNASEL  | 0.04  | 0.00  | 0.03  | 0.11  |
| 6045 | RNF2    | 0.07  | 0.00  | 0.03  | 0.04  |
| 6046 | BRD2    | 0.00  | 0.00  | 0.05  | 0.24  |
| 6047 | RNF4    | -0.02 | 0.00  | 0.00  | 0.12  |
| 6048 | RNF5    | 0.00  | 0.00  | 0.05  | 0.15  |
| 6049 | RNF6    | -0.05 | 0.00  | -0.08 | 0.23  |
| 6051 | RNPEP   | 0.09  | 0.00  | 0.05  | 0.18  |
| 6059 | ABCE1   | 0.00  | 0.00  | 0.00  | NaN   |
| 6091 | ROBO1   | -0.05 | 0.00  | -0.03 | -0.07 |
| 6093 | ROCK1   | 0.00  | -0.09 | 0.00  | 0.14  |
| 6094 | ROM1    | -0.02 | 0.00  | 0.03  | 0.05  |
| 6095 | RORA    | 0.02  | 0.00  | -0.05 | 0.07  |
| 6096 | RORB    | -0.02 | 0.00  | 0.00  | -0.05 |
| 6097 | RORC    | 0.07  | 0.00  | 0.19  | 0.05  |
| 6098 | ROS1    | 0.02  | 0.00  | 0.00  | 0.04  |
| 6102 | RP2     | -0.05 | 0.00  | -0.11 | 0.22  |
| 6103 | RPGR    | -0.05 | 0.00  | -0.11 | 0.08  |
| 6117 | RPA1    | -0.05 | 0.00  | 0.00  | 0.15  |
| 6118 | RPA2    | -0.02 | 0.09  | 0.00  | 0.27  |
| 6119 | RPA3    | 0.00  | 0.00  | 0.03  | 0.17  |
| 6120 | RPE     | 0.00  | 0.00  | 0.00  | NaN   |
| 6121 | RPE65   | -0.02 | 0.00  | 0.00  | 0.14  |
| 6122 | RPL3    | -0.04 | 0.00  | -0.03 | 0.35  |
| 6123 | RPL3L   | 0.04  | 0.18  | 0.00  | 0.01  |
| 6124 | RPL4    | 0.00  | 0.09  | -0.05 | 0.02  |
| 6125 | RPL5    | -0.02 | 0.00  | -0.03 | 0.02  |
| 6128 | RPL6    | 0.00  | 0.00  | 0.00  | NaN   |
| 6129 | RPL7    | 0.15  | 0.09  | 0.11  | 0.17  |
| 6132 | RPL8    | 0.15  | 0.00  | 0.30  | 0.23  |
| 6133 | RPL9    | -0.05 | 0.00  | -0.03 | 0.08  |
| 6134 | RPL10   | 0.00  | 0.00  | -0.03 | 0.65  |
| 6135 | RPL11   | 0.00  | 0.00  | 0.00  | NaN   |
| 6136 | RPL12   | 0.00  | 0.00  | 0.00  | 0.02  |
| 6137 | RPL13   | -0.04 | 0.00  | 0.03  | -0.02 |
| 6138 | RPL15   | -0.04 | 0.00  | -0.05 | 0.11  |
| 6139 | RPL17   | -0.02 | -0.09 | -0.03 | 0.16  |
| 6141 | RPL18   | 0.00  | 0.00  | -0.03 | 0.58  |
| 6142 | RPL18A  | 0.02  | 0.00  | 0.00  | 0.18  |

|      |         |       |      |       |       |
|------|---------|-------|------|-------|-------|
| 6143 | RPL19   | 0.00  | 0.55 | 0.05  | 0.49  |
| 6144 | RPL21   | -0.05 | 0.00 | -0.08 | 0.02  |
| 6146 | RPL22   | -0.02 | 0.00 | 0.00  | 0.08  |
| 6147 | RPL23A  | 0.04  | 0.09 | 0.00  | 0.26  |
| 6150 | MRPL23  | 0.00  | 0.00 | 0.00  | NaN   |
| 6152 | RPL24   | 0.00  | 0.00 | -0.03 | 0.73  |
| 6155 | RPL27   | -0.04 | 0.00 | 0.00  | 0.12  |
| 6156 | RPL30   | 0.16  | 0.18 | 0.27  | 0.22  |
| 6157 | RPL27A  | 0.00  | 0.00 | -0.08 | -0.07 |
| 6158 | RPL28   | 0.00  | 0.09 | -0.03 | 0.49  |
| 6159 | RPL29   | 0.00  | 0.00 | 0.00  | NaN   |
| 6160 | RPL31   | 0.02  | 0.00 | 0.00  | 0.19  |
| 6161 | RPL32   | 0.04  | 0.00 | 0.00  | 0.17  |
| 6164 | RPL34   | -0.02 | 0.00 | 0.00  | 0.03  |
| 6166 | RPL36AL | 0.02  | 0.00 | 0.00  | 0.15  |
| 6167 | RPL37   | 0.04  | 0.18 | 0.00  | 0.26  |
| 6168 | RPL37A  | 0.02  | 0.00 | 0.00  | 0.25  |
| 6169 | RPL38   | 0.04  | 0.18 | 0.08  | 0.37  |
| 6170 | RPL39   | -0.05 | 0.00 | -0.08 | 0.28  |
| 6171 | RPL41   | 0.04  | 0.00 | 0.00  | 0.15  |
| 6173 | RPL36A  | -0.05 | 0.00 | -0.08 | 0.25  |
| 6175 | RPLP0   | 0.02  | 0.00 | 0.00  | 0.21  |
| 6176 | RPLP1   | 0.00  | 0.00 | -0.05 | 0.02  |
| 6181 | RPLP2   | 0.00  | 0.00 | 0.00  | NaN   |
| 6182 | MRPL12  | 0.00  | 0.09 | 0.08  | 0.04  |
| 6183 | MRPS12  | 0.02  | 0.09 | 0.05  | 0.21  |
| 6184 | RPN1    | 0.00  | 0.00 | -0.03 | 0.45  |
| 6185 | RPN2    | 0.02  | 0.00 | 0.03  | 0.25  |
| 6187 | RPS2    | 0.04  | 0.18 | 0.00  | 0.02  |
| 6188 | RPS3    | 0.07  | 0.09 | 0.00  | 0.31  |
| 6189 | RPS3A   | -0.02 | 0.00 | 0.00  | 0.11  |
| 6191 | RPS4X   | -0.04 | 0.00 | -0.08 | 0.35  |
| 6193 | RPS5    | 0.00  | 0.18 | 0.00  | 0.44  |
| 6194 | RPS6    | -0.04 | 0.00 | 0.00  | 0.16  |
| 6195 | RPS6KA1 | -0.02 | 0.09 | 0.00  | 0.19  |
| 6196 | RPS6KA2 | -0.02 | 0.00 | -0.03 | 0.02  |
| 6197 | RPS6KA3 | -0.05 | 0.00 | -0.11 | 0.00  |
| 6198 | RPS6KB1 | 0.22  | 0.18 | 0.03  | 0.62  |
| 6199 | RPS6KB2 | 0.07  | 0.18 | 0.05  | 0.26  |
| 6201 | RPS7    | -0.02 | 0.00 | 0.00  | 0.07  |
| 6202 | RPS8    | 0.00  | 0.00 | 0.05  | 0.21  |
| 6203 | RPS9    | 0.00  | 0.09 | 0.00  | 0.25  |
| 6204 | RPS10   | 0.00  | 0.00 | 0.05  | 0.01  |
| 6205 | RPS11   | 0.02  | 0.00 | -0.03 | 0.28  |
| 6206 | RPS12   | -0.02 | 0.00 | 0.11  | 0.06  |
| 6207 | RPS13   | 0.00  | 0.00 | -0.05 | -0.07 |
| 6208 | RPS14   | 0.00  | 0.00 | 0.00  | NaN   |



|      |         |       |       |       |       |
|------|---------|-------|-------|-------|-------|
| 6209 | RPS15   | 0.04  | 0.09  | -0.03 | 0.08  |
| 6210 | RPS15A  | 0.02  | 0.09  | 0.00  | 0.01  |
| 6217 | RPS16   | 0.02  | 0.00  | 0.08  | 0.16  |
| 6222 | RPS18   | 0.00  | 0.00  | 0.05  | -0.02 |
| 6223 | RPS19   | 0.02  | 0.00  | -0.03 | 0.43  |
| 6224 | RPS20   | 0.11  | 0.00  | 0.14  | 0.11  |
| 6227 | RPS21   | 0.05  | 0.09  | 0.08  | 0.20  |
| 6228 | RPS23   | 0.00  | 0.09  | -0.14 | 0.07  |
| 6229 | RPS24   | -0.02 | 0.00  | 0.03  | 0.16  |
| 6230 | RPS25   | -0.05 | 0.00  | 0.00  | 0.06  |
| 6231 | RPS26   | 0.04  | 0.00  | 0.00  | 0.14  |
| 6232 | RPS27   | 0.05  | 0.00  | 0.14  | 0.07  |
| 6233 | RPS27A  | 0.00  | 0.00  | 0.00  | NaN   |
| 6234 | RPS28   | 0.00  | -0.09 | 0.00  | 0.06  |
| 6235 | RPS29   | 0.02  | 0.00  | 0.00  | 0.11  |
| 6236 | RRAD    | -0.05 | 0.00  | 0.00  | -0.01 |
| 6237 | RRAS    | 0.07  | 0.09  | -0.03 | 0.20  |
| 6238 | RRBP1   | 0.00  | 0.00  | -0.08 | 0.38  |
| 6239 | RREB1   | -0.02 | 0.00  | 0.05  | 0.19  |
| 6240 | RRM1    | -0.02 | 0.00  | -0.03 | 0.05  |
| 6241 | RRM2    | -0.02 | 0.00  | 0.00  | 0.09  |
| 6247 | RS1     | -0.05 | -0.09 | -0.11 | -0.04 |
| 6248 | RSC1A1  | -0.02 | 0.00  | 0.00  | 0.09  |
| 6251 | RSU1    | -0.02 | 0.00  | 0.08  | 0.18  |
| 6252 | RTN1    | 0.02  | 0.00  | -0.03 | 0.14  |
| 6253 | RTN2    | -0.02 | 0.00  | -0.03 | 0.10  |
| 6256 | RXRA    | 0.13  | 0.00  | 0.05  | -0.02 |
| 6257 | RXRB    | 0.00  | 0.00  | 0.05  | 0.28  |
| 6258 | RXRG    | 0.04  | 0.00  | 0.08  | -0.05 |
| 6259 | RYK     | 0.00  | 0.00  | 0.00  | NaN   |
| 6261 | RYR1    | 0.02  | 0.09  | 0.05  | 0.04  |
| 6262 | RYR2    | 0.07  | 0.00  | 0.03  | 0.03  |
| 6263 | RYR3    | -0.02 | 0.00  | -0.16 | -0.10 |
| 6272 | SORT1   | 0.00  | 0.00  | -0.03 | 0.15  |
| 6278 | S100A7  | 0.05  | 0.00  | 0.16  | 0.12  |
| 6279 | S100A8  | 0.05  | 0.00  | 0.19  | 0.06  |
| 6280 | S100A9  | 0.05  | 0.00  | 0.19  | 0.06  |
| 6281 | S100A10 | 0.07  | 0.00  | 0.19  | 0.16  |
| 6282 | S100A11 | 0.07  | 0.00  | 0.19  | 0.01  |
| 6283 | S100A12 | 0.05  | 0.00  | 0.19  | -0.06 |
| 6284 | S100A13 | 0.07  | 0.00  | 0.16  | 0.24  |
| 6285 | S100B   | 0.00  | 0.09  | 0.00  | 0.00  |
| 6286 | S100P   | -0.02 | 0.00  | 0.00  | -0.14 |
| 6289 | SAA2    | 0.00  | 0.00  | -0.05 | 0.19  |
| 6291 | SAA4    | 0.00  | 0.00  | -0.05 | -0.01 |
| 6294 | SAFB    | -0.02 | 0.00  | 0.00  | 0.08  |
| 6295 | SAG     | 0.00  | 0.00  | 0.00  | NaN   |

|      |          |       |       |       |       |
|------|----------|-------|-------|-------|-------|
| 6299 | SALL1    | -0.09 | 0.00  | -0.03 | 0.24  |
| 6301 | SARS     | 0.00  | 0.00  | -0.03 | -0.07 |
| 6304 | SATB1    | -0.02 | 0.00  | -0.03 | 0.18  |
| 6305 | SBF1     | 0.00  | 0.09  | 0.03  | 0.16  |
| 6307 | SC4MOL   | 0.00  | 0.00  | -0.05 | 0.07  |
| 6309 | SC5DL    | -0.07 | 0.00  | 0.00  | -0.03 |
| 6317 | SERPINB3 | -0.02 | -0.09 | 0.00  | 0.19  |
| 6318 | SERPINB4 | -0.02 | -0.09 | 0.00  | 0.09  |
| 6319 | SCD      | -0.02 | 0.00  | -0.03 | 0.02  |
| 6322 | SCML1    | -0.05 | -0.09 | -0.11 | 0.01  |
| 6323 | SCN1A    | -0.02 | 0.00  | 0.03  | 0.11  |
| 6324 | SCN1B    | -0.02 | 0.09  | 0.08  | -0.09 |
| 6326 | SCN2A2   | -0.02 | 0.00  | 0.03  | 0.00  |
| 6327 | SCN2B    | -0.05 | 0.00  | 0.00  | 0.01  |
| 6328 | SCN3A    | -0.02 | 0.00  | 0.03  | -0.02 |
| 6329 | SCN4A    | 0.15  | 0.18  | 0.03  | 0.14  |
| 6331 | SCN5A    | -0.04 | 0.00  | 0.00  | 0.00  |
| 6334 | SCN8A    | 0.02  | 0.00  | -0.03 | 0.12  |
| 6335 | SCN9A    | -0.02 | 0.00  | 0.03  | -0.08 |
| 6336 | SCN10A   | -0.04 | 0.00  | 0.00  | 0.02  |
| 6337 | SCNN1A   | -0.02 | 0.09  | 0.05  | 0.03  |
| 6338 | SCNN1B   | 0.02  | 0.00  | 0.00  | 0.05  |
| 6339 | SCNN1D   | 0.00  | 0.00  | 0.05  | -0.05 |
| 6340 | SCNN1G   | 0.02  | 0.00  | 0.00  | -0.18 |
| 6342 | SCP2     | 0.00  | 0.00  | -0.03 | 0.02  |
| 6344 | SCTR     | 0.00  | 0.00  | 0.00  | NaN   |
| 6382 | SDC1     | 0.00  | 0.00  | 0.00  | NaN   |
| 6383 | SDC2     | 0.18  | 0.18  | 0.27  | 0.09  |
| 6385 | SDC4     | 0.04  | 0.09  | 0.03  | 0.39  |
| 6386 | SDCBP    | 0.15  | 0.00  | 0.14  | 0.06  |
| 6388 | SDF2     | 0.04  | 0.09  | 0.00  | 0.50  |
| 6389 | SDHA     | 0.02  | 0.18  | 0.00  | 0.26  |
| 6390 | SDHB     | 0.00  | 0.00  | 0.00  | NaN   |
| 6391 | SDHC     | 0.11  | 0.00  | 0.14  | 0.51  |
| 6392 | SDHD     | -0.07 | 0.00  | 0.00  | 0.03  |
| 6397 | SEC14L1  | 0.04  | 0.00  | 0.00  | 0.19  |
| 6398 | SECTM1   | -0.04 | 0.09  | 0.08  | 0.01  |
| 6400 | SEL1L    | 0.00  | 0.00  | 0.00  | 0.28  |
| 6401 | SELE     | 0.02  | 0.00  | 0.05  | 0.20  |
| 6402 | SELL     | 0.02  | 0.00  | 0.05  | -0.04 |
| 6403 | SELP     | 0.02  | 0.00  | 0.05  | -0.02 |
| 6404 | SELPLG   | 0.00  | 0.00  | 0.00  | NaN   |
| 6405 | SEMA3F   | 0.00  | 0.00  | 0.03  | 0.15  |
| 6406 | SEMG1    | 0.04  | 0.09  | 0.03  | 0.05  |
| 6414 | SEPP1    | 0.02  | 0.09  | 0.00  | 0.18  |
| 6415 | SEPW1    | -0.02 | 0.00  | 0.00  | 0.28  |
| 6416 | MAP2K4   | -0.09 | 0.00  | -0.03 | 0.15  |

|      |         |       |       |       |       |
|------|---------|-------|-------|-------|-------|
| 6418 | SET     | 0.02  | 0.00  | 0.00  | 0.10  |
| 6419 | SETMAR  | -0.02 | 0.00  | 0.00  | 0.15  |
| 6421 | SFPQ    | -0.02 | 0.00  | 0.00  | 0.03  |
| 6422 | SFRP1   | 0.05  | 0.09  | 0.03  | -0.03 |
| 6424 | SFRP4   | -0.02 | 0.00  | -0.03 | 0.02  |
| 6425 | SFRP5   | -0.02 | 0.00  | -0.03 | 0.05  |
| 6426 | SFRS1   | 0.09  | 0.00  | 0.03  | 0.18  |
| 6427 | SFRS2   | 0.04  | 0.00  | 0.03  | 0.12  |
| 6428 | SFRS3   | 0.02  | 0.00  | 0.05  | 0.14  |
| 6429 | SFRS4   | -0.02 | 0.09  | 0.00  | 0.13  |
| 6430 | SFRS5   | -0.02 | 0.00  | 0.00  | 0.17  |
| 6431 | SFRS6   | 0.02  | 0.09  | 0.03  | 0.14  |
| 6432 | SFRS7   | 0.00  | 0.00  | 0.00  | NaN   |
| 6433 | SFRS8   | 0.00  | 0.00  | 0.00  | NaN   |
| 6434 | SFRS10  | 0.05  | 0.00  | 0.03  | 0.19  |
| 6439 | SFTPB   | 0.02  | 0.00  | 0.00  | 0.09  |
| 6440 | SFTPC   | -0.13 | -0.18 | -0.22 | 0.05  |
| 6441 | SFTPD   | -0.02 | 0.00  | 0.03  | 0.14  |
| 6442 | SGCA    | 0.15  | 0.27  | 0.11  | 0.17  |
| 6443 | SGCB    | -0.02 | 0.00  | 0.00  | 0.02  |
| 6444 | SGCD    | 0.00  | 0.00  | 0.00  | NaN   |
| 6445 | SGCG    | -0.07 | 0.00  | -0.11 | 0.05  |
| 6446 | SGK     | -0.02 | 0.00  | 0.08  | 0.22  |
| 6448 | SGSH    | 0.00  | 0.00  | -0.03 | -0.01 |
| 6450 | SH3BGR  | 0.00  | 0.00  | 0.00  | 0.21  |
| 6451 | SH3BGRL | -0.04 | 0.00  | -0.08 | 0.26  |
| 6452 | SH3BP2  | -0.02 | 0.00  | 0.00  | 0.03  |
| 6453 | ITSN1   | 0.00  | 0.00  | 0.00  | 0.17  |
| 6455 | SH3GL1  | 0.00  | 0.00  | 0.00  | NaN   |
| 6456 | SH3GL2  | -0.04 | 0.00  | 0.03  | 0.11  |
| 6457 | SH3GL3  | 0.00  | 0.00  | -0.03 | 0.06  |
| 6461 | SHB     | -0.05 | 0.00  | 0.03  | -0.15 |
| 6462 | SHBG    | -0.07 | 0.00  | 0.00  | 0.03  |
| 6464 | SHC1    | 0.09  | 0.00  | 0.14  | 0.24  |
| 6469 | SHH     | 0.02  | 0.00  | -0.03 | 0.12  |
| 6470 | SHMT1   | -0.05 | 0.00  | 0.00  | -0.12 |
| 6472 | SHMT2   | 0.02  | 0.18  | 0.00  | 0.12  |
| 6474 | SHOX2   | 0.02  | 0.00  | 0.03  | 0.11  |
| 6476 | SI      | 0.02  | 0.00  | 0.00  | -0.11 |
| 6477 | SIAH1   | -0.09 | 0.09  | 0.03  | 0.15  |
| 6478 | SIAH2   | 0.02  | 0.00  | 0.05  | 0.01  |
| 6490 | SILV    | 0.04  | 0.00  | 0.00  | -0.25 |
| 6493 | SIM2    | 0.00  | 0.00  | 0.00  | 0.15  |
| 6494 | SIPA1   | 0.02  | 0.00  | 0.05  | 0.13  |
| 6495 | SIX1    | 0.00  | 0.00  | 0.00  | 0.00  |
| 6496 | SIX3    | 0.00  | 0.00  | 0.00  | NaN   |
| 6497 | SKI     | -0.02 | 0.00  | 0.03  | 0.25  |

|      |         |       |       |       |       |
|------|---------|-------|-------|-------|-------|
| 6498 | SKIL    | 0.05  | 0.00  | 0.05  | 0.11  |
| 6499 | SKIV2L  | 0.00  | 0.00  | 0.05  | 0.01  |
| 6502 | SKP2    | 0.02  | 0.27  | 0.00  | 0.12  |
| 6505 | SLC1A1  | -0.05 | 0.00  | -0.05 | 0.16  |
| 6506 | SLC1A2  | 0.04  | 0.00  | -0.03 | 0.17  |
| 6507 | SLC1A3  | 0.02  | 0.27  | 0.00  | 0.16  |
| 6508 | SLC4A3  | 0.00  | 0.00  | 0.00  | NaN   |
| 6509 | SLC1A4  | 0.00  | 0.00  | 0.00  | NaN   |
| 6510 | SLC1A5  | -0.04 | 0.00  | -0.03 | 0.13  |
| 6511 | SLC1A6  | 0.02  | 0.00  | 0.00  | -0.01 |
| 6512 | SLC1A7  | 0.00  | 0.00  | -0.03 | 0.10  |
| 6513 | SLC2A1  | 0.02  | 0.00  | 0.00  | 0.21  |
| 6514 | SLC2A2  | 0.05  | 0.00  | 0.05  | 0.00  |
| 6515 | SLC2A3  | 0.00  | -0.09 | 0.05  | 0.17  |
| 6517 | SLC2A4  | -0.05 | 0.00  | 0.00  | 0.04  |
| 6518 | SLC2A5  | -0.02 | 0.00  | 0.00  | 0.05  |
| 6519 | SLC3A1  | 0.00  | 0.00  | 0.00  | NaN   |
| 6520 | SLC3A2  | 0.00  | 0.00  | 0.03  | 0.11  |
| 6521 | SLC4A1  | -0.02 | 0.00  | 0.00  | 0.08  |
| 6522 | SLC4A2  | 0.04  | 0.00  | 0.08  | -0.10 |
| 6523 | SLC5A1  | 0.00  | 0.00  | 0.03  | 0.17  |
| 6524 | SLC5A2  | 0.04  | 0.09  | 0.03  | 0.06  |
| 6525 | SMTN    | 0.00  | 0.00  | 0.05  | 0.00  |
| 6527 | SLC5A4  | -0.02 | 0.00  | 0.03  | 0.18  |
| 6528 | SLC5A5  | 0.02  | 0.00  | 0.00  | -0.12 |
| 6529 | SLC6A1  | -0.02 | 0.00  | 0.00  | -0.12 |
| 6530 | SLC6A2  | -0.07 | 0.00  | 0.00  | 0.20  |
| 6531 | SLC6A3  | 0.02  | 0.18  | 0.00  | -0.04 |
| 6532 | SLC6A4  | 0.04  | 0.09  | 0.00  | 0.05  |
| 6533 | SLC6A6  | 0.02  | 0.00  | 0.00  | 0.03  |
| 6534 | SLC6A7  | 0.00  | 0.00  | 0.00  | NaN   |
| 6536 | SLC6A9  | 0.00  | 0.00  | 0.03  | 0.11  |
| 6538 | SLC6A11 | -0.02 | 0.00  | 0.00  | 0.06  |
| 6539 | SLC6A12 | 0.00  | 0.09  | 0.05  | 0.10  |
| 6540 | SLC6A13 | 0.00  | 0.09  | 0.05  | 0.07  |
| 6541 | SLC7A1  | -0.05 | 0.00  | -0.05 | -0.06 |
| 6542 | SLC7A2  | -0.16 | -0.18 | -0.22 | 0.06  |
| 6546 | SLC8A1  | 0.00  | 0.00  | 0.00  | NaN   |
| 6548 | SLC9A1  | -0.02 | 0.00  | 0.00  | 0.10  |
| 6549 | SLC9A2  | 0.00  | 0.00  | 0.00  | NaN   |
| 6550 | SLC9A3  | 0.04  | 0.27  | 0.00  | 0.09  |
| 6553 | SLC9A5  | -0.04 | 0.00  | 0.00  | 0.13  |
| 6554 | SLC10A1 | -0.02 | 0.00  | 0.00  | -0.05 |
| 6555 | SLC10A2 | 0.00  | 0.00  | -0.05 | 0.11  |
| 6556 | SLC11A1 | 0.02  | 0.00  | 0.00  | 0.02  |
| 6557 | SLC12A1 | -0.05 | 0.00  | -0.08 | 0.00  |
| 6558 | SLC12A2 | 0.00  | 0.00  | -0.05 | 0.13  |

|      |         |       |       |       |       |
|------|---------|-------|-------|-------|-------|
| 6559 | SLC12A3 | -0.05 | 0.00  | 0.00  | 0.24  |
| 6560 | SLC12A4 | -0.04 | 0.00  | 0.00  | 0.20  |
| 6561 | SLC13A1 | 0.00  | 0.00  | -0.03 | 0.19  |
| 6563 | SLC14A1 | 0.00  | -0.09 | -0.03 | -0.05 |
| 6564 | SLC15A1 | -0.02 | 0.00  | -0.05 | 0.21  |
| 6565 | SLC15A2 | 0.00  | 0.00  | -0.03 | -0.12 |
| 6566 | SLC16A1 | 0.02  | 0.00  | -0.03 | 0.01  |
| 6567 | SLC16A2 | -0.04 | 0.00  | -0.08 | -0.19 |
| 6568 | SLC17A1 | 0.00  | 0.00  | 0.03  | -0.15 |
| 6569 | SLC34A1 | 0.00  | 0.00  | 0.00  | NaN   |
| 6570 | SLC18A1 | -0.15 | -0.18 | -0.22 | -0.04 |
| 6571 | SLC18A2 | -0.04 | 0.00  | 0.00  | 0.05  |
| 6573 | SLC19A1 | 0.02  | 0.09  | 0.00  | 0.15  |
| 6574 | SLC20A1 | 0.00  | 0.00  | 0.00  | NaN   |
| 6575 | SLC20A2 | 0.02  | 0.09  | 0.11  | 0.19  |
| 6576 | SLC25A1 | -0.02 | 0.00  | 0.03  | 0.01  |
| 6580 | SLC22A1 | -0.02 | 0.00  | -0.05 | -0.16 |
| 6581 | SLC22A3 | -0.02 | 0.00  | -0.05 | -0.13 |
| 6582 | SLC22A2 | -0.02 | 0.00  | -0.05 | 0.03  |
| 6583 | SLC22A4 | 0.00  | 0.00  | -0.03 | 0.05  |
| 6584 | SLC22A5 | 0.00  | 0.00  | -0.03 | 0.04  |
| 6585 | SLIT1   | -0.02 | 0.00  | -0.03 | 0.12  |
| 6586 | SLIT3   | 0.00  | 0.00  | -0.03 | 0.16  |
| 6588 | SLN     | -0.07 | -0.09 | 0.00  | 0.10  |
| 6590 | SLPI    | 0.04  | 0.09  | 0.03  | -0.03 |
| 6591 | SNAI2   | 0.13  | 0.00  | 0.11  | 0.12  |
| 6594 | SMARCA1 | -0.05 | 0.00  | -0.08 | 0.09  |
| 6595 | SMARCA2 | -0.04 | 0.00  | -0.11 | 0.31  |
| 6597 | SMARCA4 | 0.02  | 0.00  | 0.00  | 0.18  |
| 6598 | SMARCB1 | -0.02 | 0.00  | 0.03  | 0.23  |
| 6599 | SMARCC1 | -0.04 | 0.00  | 0.00  | 0.14  |
| 6601 | SMARCC2 | 0.00  | 0.00  | 0.00  | NaN   |
| 6602 | SMARCD1 | 0.02  | 0.00  | -0.03 | 0.11  |
| 6604 | SMARCD3 | 0.02  | 0.00  | -0.03 | 0.02  |
| 6605 | SMARCE1 | 0.02  | 0.09  | 0.00  | 0.35  |
| 6609 | SMPD1   | -0.02 | 0.00  | -0.03 | 0.33  |
| 6610 | SMPD2   | 0.00  | 0.00  | 0.00  | 0.19  |
| 6611 | SMS     | -0.05 | 0.00  | -0.11 | 0.19  |
| 6615 | SNAI1   | 0.07  | 0.00  | 0.05  | -0.06 |
| 6616 | SNAP25  | 0.00  | 0.00  | -0.05 | -0.11 |
| 6617 | SNAPC1  | 0.00  | 0.00  | 0.00  | 0.06  |
| 6618 | SNAPC2  | 0.00  | -0.09 | 0.00  | -0.02 |
| 6619 | SNAPC3  | -0.04 | 0.00  | -0.03 | 0.36  |
| 6620 | SNCB    | 0.00  | 0.00  | -0.03 | -0.02 |
| 6621 | SNAPC4  | 0.02  | 0.00  | 0.03  | 0.17  |
| 6622 | SNCA    | -0.04 | 0.00  | -0.03 | 0.20  |
| 6623 | SNCG    | -0.02 | 0.00  | -0.03 | 0.12  |

|      |        |       |       |       |       |
|------|--------|-------|-------|-------|-------|
| 6625 | SNRP70 | 0.00  | 0.00  | -0.03 | 0.69  |
| 6626 | SNRPA  | 0.00  | 0.00  | 0.00  | 0.51  |
| 6627 | SNRPA1 | -0.02 | 0.00  | 0.00  | 0.13  |
| 6628 | SNRPB  | 0.02  | 0.00  | -0.03 | 0.12  |
| 6629 | SNRPB2 | 0.00  | 0.00  | -0.08 | 0.18  |
| 6631 | SNRPC  | 0.00  | 0.00  | 0.05  | 0.14  |
| 6632 | SNRPD1 | 0.00  | -0.09 | 0.03  | 0.17  |
| 6633 | SNRPD2 | -0.02 | 0.00  | 0.00  | 0.03  |
| 6634 | SNRPD3 | 0.00  | 0.00  | 0.03  | -0.03 |
| 6635 | SNRPE  | 0.07  | 0.00  | 0.05  | 0.31  |
| 6636 | SNRPF  | 0.00  | 0.09  | 0.00  | 0.34  |
| 6637 | SNRPG  | 0.02  | 0.00  | 0.00  | 0.15  |
| 6638 | SNRPN  | 0.00  | 0.09  | -0.08 | 0.01  |
| 6640 | SNTA1  | 0.00  | 0.00  | 0.00  | NaN   |
| 6641 | SNTB1  | 0.18  | 0.09  | 0.35  | 0.16  |
| 6642 | SNX1   | 0.00  | 0.09  | -0.08 | 0.31  |
| 6643 | SNX2   | 0.00  | 0.00  | -0.03 | 0.17  |
| 6645 | SNTB2  | -0.09 | 0.00  | 0.03  | 0.43  |
| 6646 | SOAT1  | 0.02  | 0.00  | 0.03  | 0.14  |
| 6647 | SOD1   | -0.02 | 0.00  | -0.03 | 0.09  |
| 6648 | SOD2   | -0.02 | 0.00  | -0.05 | 0.16  |
| 6649 | SOD3   | -0.05 | -0.09 | -0.05 | 0.04  |
| 6650 | SOLH   | 0.07  | 0.18  | 0.14  | 0.02  |
| 6651 | SON    | 0.00  | 0.00  | 0.00  | 0.26  |
| 6652 | SORD   | -0.04 | 0.00  | -0.11 | 0.26  |
| 6653 | SORL1  | -0.07 | 0.00  | 0.00  | 0.22  |
| 6654 | SOS1   | 0.00  | 0.00  | 0.00  | NaN   |
| 6655 | SOS2   | 0.02  | 0.00  | 0.00  | 0.18  |
| 6656 | SOX1   | 0.00  | 0.00  | -0.03 | -0.03 |
| 6657 | SOX2   | 0.04  | 0.00  | 0.00  | 0.08  |
| 6659 | SOX4   | 0.00  | 0.00  | 0.05  | 0.09  |
| 6660 | SOX5   | 0.00  | 0.00  | 0.08  | -0.13 |
| 6662 | SOX9   | 0.05  | 0.00  | 0.03  | -0.11 |
| 6663 | SOX10  | -0.04 | 0.00  | 0.03  | 0.18  |
| 6664 | SOX11  | -0.02 | 0.00  | 0.00  | 0.12  |
| 6667 | SP1    | 0.02  | 0.00  | -0.03 | 0.14  |
| 6668 | SP2    | 0.02  | 0.18  | 0.00  | 0.31  |
| 6670 | SP3    | -0.02 | 0.00  | 0.00  | 0.01  |
| 6671 | SP4    | -0.02 | 0.09  | 0.00  | 0.02  |
| 6672 | SP100  | -0.02 | 0.00  | 0.00  | 0.13  |
| 6674 | SPAG1  | 0.18  | 0.18  | 0.27  | 0.06  |
| 6675 | UAP1   | 0.05  | 0.00  | 0.14  | 0.28  |
| 6676 | SPAG4  | 0.04  | 0.00  | 0.00  | 0.16  |
| 6677 | SPAM1  | 0.00  | 0.00  | -0.03 | 0.10  |
| 6678 | SPARC  | 0.00  | 0.00  | 0.00  | NaN   |
| 6687 | SPG7   | -0.04 | 0.00  | 0.03  | 0.04  |
| 6688 | SPI1   | -0.02 | 0.00  | -0.03 | 0.23  |

|      |        |       |      |       |       |
|------|--------|-------|------|-------|-------|
| 6689 | SPIB   | 0.00  | 0.00 | -0.03 | -0.17 |
| 6690 | SPINK1 | 0.00  | 0.00 | 0.00  | NaN   |
| 6691 | SPINK2 | -0.02 | 0.00 | 0.00  | 0.02  |
| 6692 | SPINT1 | 0.00  | 0.00 | -0.11 | 0.04  |
| 6694 | SPP2   | 0.00  | 0.00 | 0.00  | NaN   |
| 6696 | SPP1   | -0.04 | 0.00 | -0.03 | -0.02 |
| 6697 | SPR    | 0.00  | 0.00 | 0.03  | -0.04 |
| 6698 | SPRR1A | 0.07  | 0.00 | 0.16  | -0.07 |
| 6699 | SPRR1B | 0.07  | 0.00 | 0.16  | 0.11  |
| 6701 | SPRR2B | 0.05  | 0.00 | 0.16  | -0.12 |
| 6707 | SPRR3  | 0.07  | 0.00 | 0.16  | 0.08  |
| 6708 | SPTA1  | 0.02  | 0.00 | 0.16  | 0.12  |
| 6709 | SPTAN1 | 0.02  | 0.00 | 0.00  | 0.23  |
| 6710 | SPTB   | -0.02 | 0.00 | 0.00  | 0.13  |
| 6711 | SPTBN1 | 0.00  | 0.00 | 0.00  | NaN   |
| 6712 | SPTBN2 | 0.07  | 0.09 | 0.03  | -0.03 |
| 6713 | SQLE   | 0.20  | 0.09 | 0.38  | 0.39  |
| 6714 | SRC    | 0.02  | 0.09 | 0.03  | 0.30  |
| 6715 | SRD5A1 | 0.02  | 0.18 | 0.00  | 0.27  |
| 6716 | SRD5A2 | 0.00  | 0.00 | 0.00  | NaN   |
| 6717 | SRI    | 0.02  | 0.00 | 0.00  | 0.12  |
| 6718 | AKR1D1 | 0.02  | 0.00 | 0.03  | 0.09  |
| 6720 | SREBF1 | -0.05 | 0.00 | 0.00  | -0.01 |
| 6721 | SREBF2 | -0.02 | 0.00 | -0.03 | 0.29  |
| 6722 | SRF    | 0.00  | 0.00 | 0.11  | 0.26  |
| 6723 | SRM    | 0.00  | 0.00 | 0.00  | NaN   |
| 6726 | SRP9   | 0.07  | 0.00 | 0.03  | -0.08 |
| 6727 | SRP14  | -0.02 | 0.00 | -0.16 | 0.41  |
| 6728 | SRP19  | 0.00  | 0.00 | -0.05 | 0.11  |
| 6729 | SRP54  | 0.02  | 0.09 | 0.00  | 0.43  |
| 6731 | SRP72  | -0.02 | 0.00 | 0.00  | 0.11  |
| 6732 | SRPK1  | 0.00  | 0.00 | 0.05  | 0.21  |
| 6733 | SRPK2  | 0.02  | 0.00 | 0.00  | 0.07  |
| 6734 | SRPR   | -0.05 | 0.00 | -0.03 | 0.15  |
| 6741 | SSB    | 0.00  | 0.00 | 0.03  | 0.15  |
| 6742 | SSBP1  | 0.02  | 0.00 | 0.00  | 0.05  |
| 6744 | SSFA2  | 0.00  | 0.00 | 0.00  | NaN   |
| 6745 | SSR1   | -0.02 | 0.00 | 0.05  | 0.28  |
| 6746 | SSR2   | 0.09  | 0.00 | 0.14  | 0.34  |
| 6747 | SSR3   | 0.02  | 0.00 | 0.03  | 0.13  |
| 6748 | SSR4   | 0.00  | 0.00 | -0.03 | 0.40  |
| 6749 | SSRP1  | 0.00  | 0.00 | 0.05  | 0.30  |
| 6750 | SST    | 0.04  | 0.00 | 0.03  | -0.10 |
| 6751 | SSTR1  | 0.00  | 0.00 | -0.03 | 0.04  |
| 6752 | SSTR2  | 0.05  | 0.00 | 0.03  | 0.05  |
| 6753 | SSTR3  | -0.04 | 0.00 | 0.03  | 0.18  |
| 6756 | SSX1   | -0.04 | 0.00 | -0.08 | 0.01  |

|      |         |       |       |       |       |
|------|---------|-------|-------|-------|-------|
| 6758 | SSX5    | -0.04 | 0.00  | -0.08 | -0.02 |
| 6760 | SS18    | 0.00  | -0.09 | 0.03  | 0.09  |
| 6764 | ST5     | 0.00  | 0.00  | -0.08 | -0.07 |
| 6767 | ST13    | -0.02 | 0.00  | -0.03 | 0.33  |
| 6768 | ST14    | -0.05 | 0.00  | -0.03 | 0.15  |
| 6769 | STAC    | 0.02  | 0.00  | 0.00  | -0.09 |
| 6770 | STAR    | 0.16  | 0.09  | 0.11  | -0.09 |
| 6772 | STAT1   | 0.02  | 0.00  | 0.00  | 0.02  |
| 6773 | STAT2   | 0.00  | 0.00  | 0.00  | NaN   |
| 6774 | STAT3   | -0.04 | 0.00  | 0.00  | 0.11  |
| 6775 | STAT4   | 0.02  | 0.00  | 0.00  | -0.03 |
| 6776 | STAT5A  | -0.04 | 0.00  | 0.00  | 0.27  |
| 6777 | STAT5B  | -0.04 | 0.00  | 0.00  | 0.04  |
| 6778 | STAT6   | 0.02  | 0.00  | 0.00  | 0.07  |
| 6779 | STATH   | -0.02 | 0.00  | 0.00  | 0.10  |
| 6781 | STC1    | -0.13 | -0.18 | -0.19 | 0.13  |
| 6782 | STCH    | -0.05 | -0.18 | 0.05  | 0.24  |
| 6785 | ELOVL4  | -0.04 | 0.00  | -0.03 | -0.03 |
| 6786 | STIM1   | -0.02 | 0.00  | -0.03 | 0.07  |
| 6787 | NEK4    | -0.02 | 0.00  | 0.00  | -0.03 |
| 6788 | STK3    | 0.16  | 0.09  | 0.30  | 0.19  |
| 6789 | STK4    | 0.02  | 0.09  | 0.03  | 0.05  |
| 6793 | STK10   | 0.00  | 0.00  | -0.03 | 0.18  |
| 6794 | STK11   | 0.00  | 0.00  | -0.03 | 0.15  |
| 6801 | STRN    | 0.00  | 0.00  | 0.00  | NaN   |
| 6804 | STX1A   | 0.02  | 0.00  | 0.05  | 0.20  |
| 6812 | STXBP1  | 0.00  | 0.00  | 0.00  | 0.18  |
| 6813 | STXBP2  | 0.00  | -0.09 | 0.00  | 0.06  |
| 6814 | STXBP3  | -0.02 | 0.00  | -0.03 | 0.13  |
| 6819 | SULT1C1 | 0.00  | 0.00  | 0.00  | NaN   |
| 6820 | SULT2B1 | 0.00  | 0.00  | -0.03 | -0.29 |
| 6821 | SUOX    | 0.04  | 0.00  | 0.00  | 0.18  |
| 6822 | SULT2A1 | -0.02 | 0.00  | 0.00  | -0.22 |
| 6827 | SUPT4H1 | 0.16  | 0.00  | 0.03  | 0.56  |
| 6829 | SUPT5H  | 0.02  | 0.00  | 0.08  | 0.20  |
| 6830 | SUPT6H  | 0.04  | 0.09  | 0.00  | 0.30  |
| 6832 | SUPV3L1 | 0.00  | 0.00  | 0.03  | 0.30  |
| 6833 | ABCC8   | 0.00  | 0.00  | -0.05 | 0.05  |
| 6839 | SUV39H1 | -0.04 | 0.00  | -0.05 | -0.10 |
| 6840 | SVIL    | 0.00  | 0.00  | 0.03  | 0.12  |
| 6843 | VAMP1   | -0.02 | 0.09  | 0.05  | -0.03 |
| 6844 | VAMP2   | -0.05 | 0.00  | 0.00  | 0.19  |
| 6847 | SYCP1   | -0.02 | 0.00  | -0.03 | 0.08  |
| 6850 | SYK     | -0.02 | 0.00  | 0.00  | -0.05 |
| 6853 | SYN1    | -0.05 | 0.00  | -0.08 | 0.06  |
| 6854 | SYN2    | 0.00  | 0.00  | 0.00  | 0.03  |
| 6857 | SYT1    | -0.02 | 0.00  | 0.00  | 0.12  |



|      |          |       |       |       |       |
|------|----------|-------|-------|-------|-------|
| 6861 | SYT5     | 0.00  | 0.09  | -0.03 | -0.10 |
| 6862 | T        | -0.02 | 0.00  | -0.03 | -0.01 |
| 6863 | TAC1     | 0.02  | 0.00  | 0.00  | 0.07  |
| 6865 | TACR2    | 0.00  | 0.00  | 0.03  | -0.03 |
| 6866 | TAC3     | 0.02  | 0.00  | 0.00  | -0.09 |
| 6867 | TACC1    | 0.13  | 0.09  | 0.08  | 0.24  |
| 6868 | ADAM17   | -0.02 | 0.00  | 0.00  | 0.07  |
| 6869 | TACR1    | 0.00  | 0.00  | 0.00  | NaN   |
| 6870 | TACR3    | -0.04 | 0.00  | 0.00  | 0.23  |
| 6871 | TADA2L   | 0.00  | 0.09  | 0.05  | 0.43  |
| 6872 | TAF1     | -0.04 | 0.00  | -0.08 | 0.04  |
| 6874 | TAF4     | 0.04  | 0.09  | 0.05  | 0.39  |
| 6876 | TAGLN    | -0.07 | 0.00  | 0.00  | 0.14  |
| 6877 | TAF5     | 0.00  | 0.00  | -0.03 | 0.05  |
| 6878 | TAF6     | 0.02  | 0.00  | 0.00  | 0.28  |
| 6879 | TAF7     | 0.00  | 0.00  | 0.00  | NaN   |
| 6880 | TAF9     | 0.00  | 0.00  | -0.08 | 0.09  |
| 6881 | TAF10    | -0.02 | 0.00  | -0.03 | 0.06  |
| 6883 | TAF12    | -0.02 | 0.09  | 0.00  | 0.06  |
| 6885 | MAP3K7   | -0.05 | 0.00  | 0.00  | 0.37  |
| 6886 | TAL1     | 0.00  | 0.00  | 0.00  | 0.04  |
| 6888 | TALDO1   | 0.00  | 0.00  | 0.00  | NaN   |
| 6890 | TAP1     | 0.00  | 0.00  | 0.05  | 0.14  |
| 6891 | TAP2     | 0.00  | 0.00  | 0.05  | 0.16  |
| 6894 | TARBP1   | 0.09  | 0.00  | 0.03  | 0.20  |
| 6895 | TARBP2   | 0.02  | 0.09  | -0.03 | 0.44  |
| 6897 | TARS     | 0.02  | 0.27  | 0.00  | 0.42  |
| 6898 | TAT      | -0.07 | 0.00  | 0.03  | 0.05  |
| 6899 | TBX1     | -0.02 | 0.00  | 0.08  | 0.14  |
| 6900 | CNTN2    | 0.07  | 0.00  | 0.03  | -0.18 |
| 6902 | TBCA     | 0.00  | 0.09  | -0.14 | 0.30  |
| 6903 | TBCC     | 0.00  | 0.00  | 0.08  | 0.17  |
| 6904 | TBCD     | -0.02 | 0.09  | 0.08  | 0.18  |
| 6905 | TBCE     | 0.09  | 0.00  | 0.03  | 0.11  |
| 6906 | SERPINA7 | -0.05 | 0.00  | -0.08 | -0.01 |
| 6908 | TBP      | -0.02 | 0.00  | -0.03 | 0.20  |
| 6909 | TBX2     | 0.18  | 0.18  | 0.03  | 0.12  |
| 6910 | TBX5     | 0.02  | 0.00  | 0.00  | 0.07  |
| 6915 | TBXA2R   | 0.00  | 0.00  | 0.00  | NaN   |
| 6916 | TBXAS1   | 0.02  | 0.00  | 0.00  | 0.10  |
| 6917 | TCEA1    | 0.13  | 0.00  | 0.14  | 0.24  |
| 6919 | TCEA2    | 0.09  | 0.09  | 0.08  | 0.06  |
| 6921 | TCEB1    | 0.11  | 0.00  | 0.08  | 0.29  |
| 6923 | TCEB2    | 0.04  | 0.09  | 0.00  | 0.10  |
| 6924 | TCEB3    | 0.00  | 0.00  | 0.00  | NaN   |
| 6925 | TCF4     | -0.02 | -0.09 | -0.03 | 0.07  |
| 6926 | TBX3     | 0.02  | 0.00  | 0.00  | 0.12  |

|      |         |       |       |       |       |
|------|---------|-------|-------|-------|-------|
| 6927 | TCF1    | 0.00  | 0.00  | 0.00  | NaN   |
| 6928 | TCF2    | 0.00  | 0.18  | 0.05  | 0.28  |
| 6929 | TCF3    | 0.00  | 0.00  | -0.03 | 0.14  |
| 6934 | TCF7L2  | -0.04 | 0.00  | 0.00  | 0.12  |
| 6935 | TCF8    | -0.02 | 0.00  | 0.08  | -0.03 |
| 6936 | C2orf3  | 0.00  | 0.00  | 0.00  | NaN   |
| 6938 | TCF12   | -0.02 | 0.00  | -0.05 | 0.09  |
| 6939 | TCF15   | 0.02  | 0.00  | -0.03 | 0.05  |
| 6940 | ZNF354A | 0.00  | 0.00  | -0.03 | 0.02  |
| 6942 | TCF20   | -0.02 | 0.00  | -0.03 | 0.10  |
| 6943 | TCF21   | -0.02 | 0.00  | 0.08  | -0.06 |
| 6947 | TCN1    | -0.04 | 0.00  | 0.00  | 0.07  |
| 6948 | TCN2    | 0.00  | 0.00  | 0.05  | 0.20  |
| 6949 | TCOF1   | 0.00  | 0.00  | 0.00  | NaN   |
| 6950 | TCP1    | -0.02 | 0.00  | -0.05 | 0.38  |
| 6954 | TCP11   | 0.00  | 0.00  | 0.05  | 0.04  |
| 6988 | TCTA    | 0.00  | 0.00  | 0.00  | NaN   |
| 6992 | PPP1R11 | 0.00  | 0.00  | 0.05  | 0.03  |
| 6996 | TDG     | 0.00  | 0.00  | 0.00  | NaN   |
| 6997 | TDGF1   | -0.04 | 0.00  | 0.00  | 0.09  |
| 6999 | TDO2    | -0.02 | 0.00  | -0.03 | -0.14 |
| 7001 | PRDX2   | 0.02  | -0.09 | 0.00  | 0.16  |
| 7003 | TEAD1   | 0.00  | 0.00  | -0.05 | 0.05  |
| 7004 | TEAD4   | -0.02 | 0.09  | 0.08  | 0.13  |
| 7005 | TEAD3   | 0.00  | 0.00  | 0.05  | 0.06  |
| 7006 | TEC     | -0.04 | 0.00  | 0.00  | -0.05 |
| 7007 | TECTA   | -0.07 | 0.00  | 0.00  | 0.19  |
| 7008 | TEF     | -0.02 | 0.00  | -0.03 | 0.04  |
| 7009 | TEGT    | 0.02  | 0.00  | -0.03 | 0.16  |
| 7010 | TEK     | -0.11 | 0.00  | -0.05 | 0.10  |
| 7011 | TEP1    | -0.02 | 0.00  | -0.03 | 0.01  |
| 7013 | TERF1   | 0.13  | 0.09  | 0.11  | 0.36  |
| 7014 | TERF2   | -0.09 | 0.00  | 0.03  | 0.25  |
| 7015 | TERT    | 0.00  | 0.36  | 0.00  | 0.27  |
| 7016 | TESK1   | 0.00  | 0.00  | 0.00  | -0.04 |
| 7018 | TF      | 0.00  | 0.00  | 0.00  | NaN   |
| 7019 | TFAM    | -0.02 | 0.00  | -0.03 | 0.02  |
| 7020 | TFAP2A  | -0.02 | 0.00  | 0.11  | 0.10  |
| 7021 | TFAP2B  | -0.02 | 0.00  | 0.08  | -0.07 |
| 7022 | TFAP2C  | 0.04  | 0.09  | 0.05  | 0.25  |
| 7023 | TFAP4   | 0.04  | 0.00  | 0.00  | -0.06 |
| 7024 | TFCP2   | 0.02  | 0.00  | -0.03 | 0.17  |
| 7025 | NR2F1   | 0.00  | 0.00  | -0.14 | 0.04  |
| 7026 | NR2F2   | 0.04  | 0.00  | 0.00  | 0.29  |
| 7027 | TFDP1   | 0.00  | 0.00  | 0.00  | 0.06  |
| 7029 | TFDP2   | 0.02  | 0.00  | 0.03  | 0.17  |
| 7031 | TFF1    | 0.00  | 0.00  | 0.00  | -0.06 |

|      |        |       |       |       |       |
|------|--------|-------|-------|-------|-------|
| 7032 | TFF2   | 0.00  | 0.00  | 0.00  | 0.06  |
| 7033 | TFF3   | 0.00  | 0.00  | 0.00  | 0.09  |
| 7035 | TFPI   | 0.02  | 0.00  | 0.00  | 0.10  |
| 7036 | TFR2   | 0.02  | 0.00  | 0.00  | 0.12  |
| 7037 | TFRC   | 0.04  | 0.09  | 0.00  | 0.18  |
| 7038 | TG     | 0.20  | 0.09  | 0.35  | 0.09  |
| 7039 | TGFA   | 0.02  | 0.00  | 0.00  | 0.02  |
| 7040 | TGFB1  | 0.02  | 0.00  | -0.03 | 0.01  |
| 7042 | TGFB2  | 0.07  | 0.00  | 0.00  | 0.09  |
| 7043 | TGFB3  | -0.02 | 0.00  | -0.03 | 0.07  |
| 7045 | TGFBI  | 0.00  | 0.00  | -0.03 | -0.17 |
| 7046 | TGFBR1 | -0.02 | 0.00  | 0.00  | 0.03  |
| 7047 | TGM4   | -0.04 | 0.00  | 0.00  | 0.18  |
| 7048 | TGFBR2 | 0.02  | 0.00  | -0.05 | 0.08  |
| 7049 | TGFBR3 | -0.02 | 0.00  | -0.03 | 0.04  |
| 7050 | TGIF   | 0.00  | -0.09 | 0.00  | 0.02  |
| 7051 | TGM1   | -0.02 | 0.00  | 0.00  | 0.04  |
| 7052 | TGM2   | 0.00  | 0.00  | 0.03  | 0.13  |
| 7053 | TGM3   | 0.02  | 0.00  | -0.03 | -0.02 |
| 7054 | TH     | 0.00  | 0.00  | 0.00  | NaN   |
| 7056 | THBD   | 0.00  | 0.00  | -0.05 | 0.17  |
| 7057 | THBS1  | -0.02 | 0.00  | -0.16 | 0.24  |
| 7058 | THBS2  | -0.02 | 0.00  | -0.03 | 0.00  |
| 7059 | THBS3  | 0.09  | 0.00  | 0.14  | 0.31  |
| 7060 | THBS4  | 0.00  | 0.00  | -0.14 | -0.02 |
| 7064 | THOP1  | 0.00  | 0.00  | 0.00  | NaN   |
| 7066 | THPO   | 0.05  | 0.00  | 0.05  | 0.09  |
| 7067 | THRA   | 0.04  | 0.45  | 0.05  | 0.23  |
| 7068 | THRB   | -0.04 | 0.00  | -0.05 | -0.01 |
| 7070 | THY1   | -0.07 | 0.09  | 0.03  | 0.22  |
| 7072 | TIA1   | 0.02  | 0.00  | 0.00  | 0.28  |
| 7073 | TIAL1  | -0.04 | 0.00  | -0.03 | 0.10  |
| 7074 | TIAM1  | -0.02 | 0.00  | 0.00  | -0.01 |
| 7077 | TIMP2  | 0.02  | 0.18  | 0.03  | 0.13  |
| 7080 | TITF1  | 0.02  | 0.09  | 0.00  | 0.12  |
| 7082 | TJP1   | -0.04 | 0.09  | -0.16 | 0.21  |
| 7083 | TK1    | 0.05  | 0.09  | 0.03  | 0.18  |
| 7084 | TK2    | -0.09 | 0.00  | 0.00  | 0.06  |
| 7086 | TKT    | -0.02 | 0.00  | 0.00  | 0.25  |
| 7087 | ICAM5  | 0.00  | 0.00  | 0.00  | NaN   |
| 7088 | TLE1   | -0.02 | 0.00  | 0.00  | 0.20  |
| 7089 | TLE2   | 0.00  | 0.00  | 0.00  | NaN   |
| 7090 | TLE3   | 0.02  | 0.00  | -0.05 | 0.13  |
| 7091 | TLE4   | -0.02 | 0.00  | 0.00  | 0.01  |
| 7092 | TLL1   | 0.00  | 0.00  | -0.05 | 0.21  |
| 7093 | TLL2   | -0.02 | 0.00  | -0.05 | 0.03  |
| 7095 | TLOC1  | 0.05  | 0.00  | 0.05  | 0.44  |

|      |          |       |      |       |       |
|------|----------|-------|------|-------|-------|
| 7096 | TLR1     | -0.05 | 0.00 | -0.03 | 0.12  |
| 7097 | TLR2     | -0.02 | 0.00 | -0.03 | 0.06  |
| 7098 | TLR3     | -0.02 | 0.00 | -0.08 | 0.11  |
| 7099 | TLR4     | -0.02 | 0.00 | 0.00  | 0.13  |
| 7100 | TLR5     | 0.07  | 0.00 | 0.00  | 0.18  |
| 7101 | NR2E1    | 0.04  | 0.00 | 0.00  | 0.09  |
| 7104 | TM4SF4   | 0.02  | 0.00 | 0.03  | 0.18  |
| 7108 | TM7SF2   | 0.02  | 0.00 | 0.03  | 0.16  |
| 7109 | TMEM1    | 0.00  | 0.00 | 0.00  | 0.24  |
| 7110 | TMF1     | -0.05 | 0.00 | 0.00  | 0.06  |
| 7112 | TMPO     | 0.00  | 0.00 | 0.00  | NaN   |
| 7113 | TMPRSS2  | 0.00  | 0.00 | 0.00  | 0.26  |
| 7122 | CLDN5    | -0.02 | 0.00 | 0.08  | -0.09 |
| 7124 | TNF      | 0.00  | 0.00 | 0.05  | 0.00  |
| 7125 | TNNC2    | 0.04  | 0.00 | 0.03  | 0.06  |
| 7126 | TNFAIP1  | 0.04  | 0.09 | 0.00  | 0.26  |
| 7127 | TNFAIP2  | 0.00  | 0.00 | 0.00  | NaN   |
| 7128 | TNFAIP3  | -0.02 | 0.00 | 0.03  | 0.14  |
| 7130 | TNFAIP6  | -0.02 | 0.00 | 0.03  | 0.04  |
| 7132 | TNFRSF1A | -0.02 | 0.09 | 0.05  | 0.21  |
| 7133 | TNFRSF1B | -0.02 | 0.00 | 0.00  | 0.10  |
| 7134 | TNNC1    | 0.00  | 0.00 | 0.00  | NaN   |
| 7135 | TNNI1    | 0.07  | 0.00 | 0.05  | 0.02  |
| 7137 | TNNI3    | 0.00  | 0.09 | -0.03 | -0.23 |
| 7139 | TNNT2    | 0.07  | 0.00 | 0.05  | -0.06 |
| 7140 | TNNT3    | 0.00  | 0.00 | 0.00  | NaN   |
| 7141 | TNP1     | 0.02  | 0.00 | 0.00  | 0.09  |
| 7142 | TNP2     | 0.04  | 0.00 | 0.00  | 0.01  |
| 7143 | TNR      | 0.02  | 0.00 | 0.03  | -0.11 |
| 7148 | TNXB     | 0.00  | 0.00 | 0.05  | 0.16  |
| 7150 | TOP1     | 0.04  | 0.00 | 0.00  | 0.13  |
| 7153 | TOP2A    | 0.02  | 0.09 | 0.00  | 0.24  |
| 7155 | TOP2B    | -0.04 | 0.00 | -0.05 | 0.24  |
| 7156 | TOP3A    | -0.05 | 0.00 | 0.00  | 0.04  |
| 7157 | TP53     | -0.07 | 0.00 | 0.00  | 0.17  |
| 7158 | TP53BP1  | -0.04 | 0.00 | -0.14 | 0.23  |
| 7159 | TP53BP2  | 0.07  | 0.00 | 0.00  | 0.10  |
| 7161 | TP73     | -0.02 | 0.00 | 0.00  | 0.01  |
| 7162 | TPBG     | 0.00  | 0.00 | -0.05 | 0.12  |
| 7163 | TPD52    | 0.15  | 0.09 | 0.14  | 0.23  |
| 7164 | TPD52L1  | -0.02 | 0.00 | 0.03  | 0.10  |
| 7165 | TPD52L2  | 0.09  | 0.00 | 0.08  | 0.23  |
| 7167 | TPI1     | -0.02 | 0.09 | 0.05  | 0.31  |
| 7168 | TPM1     | 0.02  | 0.00 | -0.05 | 0.12  |
| 7169 | TPM2     | 0.00  | 0.00 | 0.00  | 0.05  |
| 7171 | TPM4     | 0.00  | 0.00 | 0.00  | NaN   |
| 7172 | TPMT     | 0.00  | 0.00 | 0.08  | 0.26  |

|      |        |       |       |       |       |
|------|--------|-------|-------|-------|-------|
| 7173 | TPO    | -0.02 | 0.00  | 0.00  | -0.05 |
| 7174 | TPP2   | -0.02 | 0.00  | -0.05 | 0.17  |
| 7175 | TPR    | 0.04  | 0.09  | 0.03  | 0.42  |
| 7178 | TPT1   | -0.05 | 0.00  | -0.11 | 0.09  |
| 7181 | NR2C1  | 0.00  | 0.09  | 0.00  | 0.21  |
| 7182 | NR2C2  | 0.02  | 0.00  | 0.00  | -0.17 |
| 7185 | TRAF1  | -0.02 | 0.00  | 0.00  | -0.01 |
| 7186 | TRAF2  | 0.02  | 0.00  | 0.03  | -0.20 |
| 7187 | TRAF3  | 0.00  | 0.00  | -0.03 | 0.33  |
| 7188 | TRAF5  | 0.07  | 0.00  | 0.00  | 0.10  |
| 7189 | TRAF6  | 0.04  | 0.00  | -0.03 | 0.27  |
| 7200 | TRH    | 0.00  | 0.00  | -0.03 | -0.12 |
| 7201 | TRHR   | 0.20  | 0.09  | 0.27  | 0.03  |
| 7203 | CCT3   | 0.04  | 0.00  | 0.11  | 0.19  |
| 7204 | TRIO   | 0.05  | 0.27  | 0.03  | 0.25  |
| 7205 | TRIP6  | 0.02  | 0.00  | 0.00  | -0.14 |
| 7216 | TRO    | -0.04 | 0.00  | -0.05 | 0.12  |
| 7220 | TRPC1  | 0.02  | 0.00  | 0.03  | 0.13  |
| 7222 | TRPC3  | 0.00  | 0.09  | 0.08  | 0.03  |
| 7223 | TRPC4  | -0.05 | 0.00  | -0.11 | 0.18  |
| 7224 | TRPC5  | -0.05 | 0.00  | -0.08 | -0.10 |
| 7225 | TRPC6  | -0.04 | -0.09 | 0.00  | 0.06  |
| 7226 | TRPM2  | 0.00  | 0.00  | 0.00  | 0.21  |
| 7227 | TRPS1  | 0.22  | 0.27  | 0.41  | 0.11  |
| 7247 | TSN    | 0.00  | 0.00  | 0.00  | NaN   |
| 7248 | TSC1   | 0.02  | 0.00  | 0.00  | 0.04  |
| 7251 | TSG101 | 0.00  | 0.00  | -0.05 | 0.08  |
| 7252 | TSHB   | -0.02 | 0.00  | -0.03 | -0.06 |
| 7253 | TSHR   | 0.00  | 0.00  | 0.00  | 0.11  |
| 7257 | TSNAX  | 0.09  | 0.00  | 0.03  | 0.18  |
| 7260 | TSSC1  | -0.02 | 0.00  | 0.00  | 0.23  |
| 7263 | TST    | -0.04 | 0.00  | 0.03  | -0.18 |
| 7264 | TSTA3  | 0.16  | 0.00  | 0.35  | 0.17  |
| 7265 | TTC1   | 0.00  | 0.00  | -0.03 | 0.10  |
| 7266 | DNAJC7 | -0.04 | 0.09  | 0.00  | 0.21  |
| 7267 | TTC3   | 0.00  | 0.00  | 0.00  | 0.19  |
| 7268 | TTC4   | 0.00  | 0.00  | 0.00  | 0.22  |
| 7270 | TTF1   | 0.02  | 0.00  | 0.03  | 0.24  |
| 7272 | TTK    | -0.04 | 0.00  | -0.03 | 0.06  |
| 7273 | TTN    | 0.00  | 0.00  | 0.00  | NaN   |
| 7274 | TTPA   | 0.13  | 0.00  | 0.14  | 0.19  |
| 7275 | TUB    | 0.00  | 0.00  | -0.08 | -0.09 |
| 7276 | TTR    | 0.02  | -0.09 | 0.00  | 0.14  |
| 7277 | TUBA1  | 0.00  | 0.00  | 0.00  | NaN   |
| 7278 | TUBA2  | -0.05 | 0.00  | -0.11 | -0.14 |
| 7280 | TUBB   | 0.00  | 0.00  | 0.05  | 0.14  |
| 7283 | TUBG1  | -0.04 | 0.00  | 0.00  | -0.01 |

|      |         |       |       |       |       |
|------|---------|-------|-------|-------|-------|
| 7284 | TUFM    | 0.05  | 0.00  | 0.00  | 0.18  |
| 7286 | TUFT1   | 0.07  | 0.09  | 0.19  | 0.34  |
| 7287 | TULP1   | 0.00  | 0.00  | 0.05  | -0.16 |
| 7288 | TULP2   | 0.00  | 0.00  | -0.03 | -0.24 |
| 7289 | TULP3   | -0.02 | 0.09  | 0.08  | 0.34  |
| 7290 | HIRA    | -0.02 | 0.00  | 0.05  | -0.10 |
| 7292 | TNFSF4  | 0.02  | 0.00  | 0.05  | 0.00  |
| 7294 | TXK     | -0.04 | 0.00  | 0.00  | 0.24  |
| 7295 | TXN     | -0.02 | 0.00  | 0.00  | 0.04  |
| 7296 | TXNRD1  | 0.00  | 0.00  | 0.00  | NaN   |
| 7297 | TYK2    | 0.00  | 0.00  | 0.00  | NaN   |
| 7298 | TYMS    | 0.02  | -0.09 | 0.00  | 0.13  |
| 7299 | TYR     | -0.05 | 0.00  | 0.03  | 0.10  |
| 7301 | TYRO3   | -0.02 | 0.09  | -0.14 | 0.04  |
| 7305 | TYROBP  | 0.00  | 0.09  | 0.05  | -0.10 |
| 7306 | TYRP1   | -0.05 | 0.00  | -0.03 | 0.11  |
| 7307 | U2AF1   | 0.00  | 0.00  | -0.03 | 0.11  |
| 7311 | UBA52   | 0.02  | 0.00  | 0.00  | 0.11  |
| 7316 | UBC     | 0.02  | 0.00  | 0.00  | 0.05  |
| 7317 | UBE1    | -0.05 | 0.00  | -0.08 | 0.21  |
| 7318 | UBE1L   | 0.00  | 0.00  | 0.00  | NaN   |
| 7319 | UBE2A   | -0.05 | 0.00  | -0.08 | 0.33  |
| 7321 | UBE2D1  | -0.02 | 0.00  | -0.03 | 0.08  |
| 7322 | UBE2D2  | 0.00  | 0.00  | 0.00  | NaN   |
| 7323 | UBE2D3  | -0.04 | 0.00  | 0.00  | 0.22  |
| 7324 | UBE2E1  | -0.04 | 0.00  | -0.05 | 0.19  |
| 7326 | UBE2G1  | -0.04 | 0.00  | 0.00  | 0.27  |
| 7327 | UBE2G2  | 0.00  | 0.00  | 0.00  | 0.23  |
| 7328 | UBE2H   | 0.02  | 0.00  | 0.00  | 0.07  |
| 7329 | UBE2I   | 0.04  | 0.18  | 0.03  | 0.26  |
| 7332 | UBE2L3  | 0.00  | 0.00  | 0.03  | 0.19  |
| 7334 | UBE2N   | 0.00  | 0.09  | 0.00  | 0.28  |
| 7336 | UBE2V2  | 0.13  | 0.00  | 0.16  | 0.14  |
| 7337 | UBE3A   | 0.00  | 0.09  | -0.08 | 0.39  |
| 7342 | UBP1    | 0.02  | 0.00  | -0.03 | 0.32  |
| 7343 | UBTF    | -0.02 | 0.00  | 0.00  | -0.01 |
| 7345 | UCHL1   | -0.05 | 0.00  | -0.08 | 0.17  |
| 7347 | UCHL3   | -0.05 | -0.09 | -0.14 | 0.15  |
| 7348 | UPK1B   | 0.00  | 0.00  | -0.03 | -0.25 |
| 7350 | UCP1    | -0.02 | 0.00  | 0.00  | 0.01  |
| 7351 | UCP2    | 0.05  | 0.09  | -0.03 | 0.26  |
| 7352 | UCP3    | 0.05  | 0.09  | -0.03 | 0.10  |
| 7353 | UFD1L   | -0.02 | 0.00  | 0.05  | -0.15 |
| 7355 | SLC35A2 | -0.04 | 0.00  | -0.05 | 0.06  |
| 7356 | SCGB1A1 | -0.02 | 0.00  | 0.03  | 0.11  |
| 7357 | UGCG    | -0.02 | 0.00  | 0.00  | 0.03  |
| 7358 | UGDH    | -0.05 | 0.00  | -0.03 | 0.02  |

|      |         |       |       |       |       |
|------|---------|-------|-------|-------|-------|
| 7360 | UGP2    | 0.02  | 0.00  | 0.00  | 0.19  |
| 7363 | UGT2B4  | -0.02 | 0.00  | 0.00  | 0.03  |
| 7365 | UGT2B10 | -0.02 | 0.00  | 0.00  | -0.07 |
| 7367 | UGT2B17 | -0.02 | 0.00  | 0.00  | 0.03  |
| 7368 | UGT8    | -0.02 | 0.00  | 0.03  | 0.20  |
| 7369 | UMOD    | 0.02  | -0.09 | 0.00  | 0.02  |
| 7372 | UMPS    | 0.00  | 0.00  | -0.03 | 0.22  |
| 7374 | UNG     | 0.00  | 0.00  | 0.00  | NaN   |
| 7375 | USP4    | 0.00  | 0.00  | 0.00  | NaN   |
| 7379 | UPK2    | -0.05 | 0.00  | 0.00  | 0.19  |
| 7381 | UQCRB   | 0.18  | 0.18  | 0.24  | 0.42  |
| 7384 | UQCRC1  | -0.04 | 0.00  | 0.00  | 0.00  |
| 7385 | UQCRC2  | 0.02  | -0.09 | 0.00  | 0.26  |
| 7386 | UQCRFS1 | 0.00  | 0.09  | 0.03  | 0.24  |
| 7388 | UQCRH   | 0.00  | 0.00  | 0.03  | 0.21  |
| 7389 | UROD    | 0.00  | 0.00  | 0.03  | 0.46  |
| 7390 | UROS    | -0.04 | 0.00  | 0.03  | 0.20  |
| 7392 | USF2    | 0.02  | 0.00  | 0.05  | -0.05 |
| 7398 | USP1    | -0.02 | 0.00  | 0.03  | 0.30  |
| 7399 | USH2A   | 0.07  | 0.00  | 0.00  | -0.01 |
| 7402 | UTRN    | 0.02  | 0.00  | 0.03  | 0.10  |
| 7403 | UTX     | -0.05 | 0.00  | -0.11 | 0.15  |
| 7404 | UTY     | 0.02  | 0.00  | -0.03 | 0.10  |
| 7405 | UVRAG   | 0.07  | 0.09  | -0.03 | 0.38  |
| 7408 | VASP    | -0.02 | 0.00  | -0.03 | 0.33  |
| 7409 | VAV1    | 0.00  | -0.09 | 0.00  | 0.05  |
| 7410 | VAV2    | 0.02  | 0.00  | 0.00  | 0.25  |
| 7411 | VBP1    | -0.05 | 0.00  | -0.11 | 0.12  |
| 7412 | VCAM1   | -0.02 | 0.00  | -0.03 | -0.18 |
| 7414 | VCL     | 0.04  | 0.00  | 0.00  | 0.49  |
| 7415 | VCP     | 0.00  | 0.00  | 0.00  | 0.12  |
| 7416 | VDAC1   | 0.00  | 0.00  | -0.03 | 0.02  |
| 7419 | VDAC3   | 0.02  | 0.09  | 0.11  | 0.44  |
| 7421 | VDR     | 0.00  | 0.00  | 0.00  | NaN   |
| 7423 | VEGFB   | 0.00  | 0.00  | 0.03  | 0.08  |
| 7424 | VEGFC   | -0.02 | 0.00  | -0.05 | 0.00  |
| 7425 | VEGF    | 0.02  | 0.00  | 0.00  | 0.09  |
| 7428 | VHL     | -0.02 | 0.00  | 0.00  | -0.04 |
| 7429 | VIL1    | 0.00  | 0.00  | 0.14  | -0.05 |
| 7430 | VIL2    | -0.02 | 0.00  | -0.03 | 0.42  |
| 7431 | VIM     | -0.02 | 0.00  | 0.08  | 0.12  |
| 7432 | VIP     | 0.00  | 0.00  | 0.00  | -0.04 |
| 7433 | VIPR1   | -0.04 | 0.00  | 0.00  | -0.08 |
| 7434 | VIPR2   | 0.02  | 0.00  | -0.03 | 0.15  |
| 7436 | VLDLR   | -0.05 | 0.00  | -0.08 | 0.22  |
| 7441 | VPREB1  | -0.02 | 0.00  | 0.03  | -0.04 |
| 7442 | TRPV1   | -0.04 | 0.00  | 0.00  | 0.04  |

|      |         |       |       |       |       |
|------|---------|-------|-------|-------|-------|
| 7443 | VRK1    | 0.00  | 0.00  | -0.03 | 0.36  |
| 7444 | VRK2    | 0.00  | 0.00  | 0.00  | NaN   |
| 7447 | VSNL1   | -0.02 | 0.00  | 0.00  | 0.06  |
| 7448 | VTN     | 0.04  | 0.09  | 0.00  | 0.05  |
| 7450 | VWF     | -0.02 | 0.18  | 0.05  | 0.15  |
| 7453 | WARS    | 0.00  | 0.00  | 0.03  | 0.15  |
| 7454 | WAS     | -0.04 | 0.00  | -0.05 | 0.13  |
| 7464 | CORO2A  | -0.02 | 0.00  | 0.00  | 0.09  |
| 7465 | WEE1    | 0.00  | 0.00  | -0.05 | 0.05  |
| 7466 | WFS1    | -0.02 | 0.00  | 0.00  | 0.06  |
| 7468 | WHSC1   | -0.02 | 0.00  | 0.00  | 0.24  |
| 7469 | WHSC2   | -0.02 | 0.00  | 0.00  | 0.08  |
| 7471 | WNT1    | 0.00  | 0.09  | 0.00  | 0.10  |
| 7472 | WNT2    | 0.00  | 0.00  | -0.03 | -0.11 |
| 7473 | WNT3    | -0.04 | 0.00  | 0.00  | 0.15  |
| 7474 | WNT5A   | -0.04 | 0.00  | -0.03 | -0.04 |
| 7475 | WNT6    | 0.00  | 0.00  | 0.00  | NaN   |
| 7476 | WNT7A   | 0.02  | 0.00  | 0.00  | 0.07  |
| 7479 | WNT8B   | -0.02 | 0.00  | -0.03 | 0.16  |
| 7480 | WNT10B  | 0.00  | 0.00  | 0.00  | NaN   |
| 7481 | WNT11   | 0.04  | 0.09  | -0.03 | -0.07 |
| 7482 | WNT2B   | 0.02  | 0.00  | -0.03 | 0.04  |
| 7485 | WRB     | 0.00  | 0.00  | 0.00  | 0.18  |
| 7486 | WRN     | -0.11 | -0.18 | -0.14 | 0.31  |
| 7490 | WT1     | 0.04  | 0.00  | -0.03 | 0.23  |
| 7494 | XBP1    | -0.02 | -0.09 | 0.03  | -0.14 |
| 7498 | XDH     | 0.00  | 0.00  | 0.00  | NaN   |
| 7504 | XK      | -0.05 | 0.00  | -0.11 | -0.07 |
| 7507 | XPA     | -0.02 | 0.00  | 0.00  | -0.03 |
| 7508 | XPC     | 0.02  | 0.00  | 0.00  | 0.24  |
| 7511 | XPNPEP1 | -0.04 | 0.00  | 0.00  | 0.14  |
| 7512 | XPNPEP2 | -0.05 | 0.00  | -0.08 | -0.13 |
| 7514 | XPO1    | 0.00  | 0.00  | 0.00  | NaN   |
| 7515 | XRCC1   | -0.02 | 0.00  | -0.03 | 0.22  |
| 7516 | XRCC2   | 0.02  | 0.00  | -0.03 | 0.14  |
| 7518 | XRCC4   | 0.00  | 0.09  | -0.14 | 0.23  |
| 7520 | XRCC5   | 0.02  | 0.00  | 0.00  | 0.20  |
| 7525 | YES1    | 0.02  | -0.09 | 0.00  | 0.11  |
| 7528 | YY1     | 0.00  | 0.00  | 0.03  | 0.41  |
| 7529 | YWHAB   | 0.02  | 0.09  | 0.03  | 0.19  |
| 7531 | YWHAE   | -0.04 | 0.00  | 0.00  | 0.12  |
| 7533 | YWHAH   | 0.00  | 0.00  | 0.03  | 0.14  |
| 7534 | YWHAZ   | 0.20  | 0.18  | 0.27  | 0.44  |
| 7535 | ZAP70   | 0.00  | 0.00  | 0.00  | NaN   |
| 7536 | SF1     | 0.00  | -0.09 | 0.03  | 0.12  |
| 7538 | ZFP36   | 0.02  | 0.00  | 0.08  | 0.11  |
| 7539 | ZFP37   | -0.02 | 0.00  | 0.00  | 0.15  |



|      |        |       |       |       |       |
|------|--------|-------|-------|-------|-------|
| 7541 | ZFP161 | 0.00  | -0.09 | -0.03 | 0.23  |
| 7542 | ZFPL1  | 0.02  | 0.00  | 0.03  | 0.20  |
| 7543 | ZFX    | -0.05 | 0.00  | -0.11 | 0.03  |
| 7544 | ZFY    | 0.00  | 0.00  | -0.05 | 0.01  |
| 7545 | ZIC1   | 0.02  | 0.00  | -0.03 | 0.07  |
| 7547 | ZIC3   | -0.02 | 0.00  | -0.08 | -0.02 |
| 7553 | ZNF7   | 0.15  | 0.00  | 0.30  | 0.35  |
| 7554 | ZNF8   | 0.00  | 0.18  | 0.00  | 0.01  |
| 7556 | ZNF10  | 0.00  | 0.00  | 0.00  | NaN   |
| 7561 | ZNF14  | 0.02  | 0.00  | 0.00  | 0.17  |
| 7564 | ZNF16  | 0.15  | 0.00  | 0.27  | 0.15  |
| 7568 | ZNF20  | 0.00  | -0.09 | 0.00  | -0.04 |
| 7570 | ZNF22  | -0.02 | 0.09  | 0.03  | 0.13  |
| 7571 | ZNF23  | -0.07 | 0.00  | 0.03  | 0.10  |
| 7572 | ZNF24  | 0.00  | -0.09 | -0.03 | 0.10  |
| 7574 | ZNF26  | 0.00  | 0.00  | 0.00  | NaN   |
| 7580 | ZNF32  | 0.00  | 0.09  | -0.03 | 0.12  |
| 7584 | ZNF35  | -0.04 | 0.00  | 0.00  | 0.15  |
| 7592 | ZNF41  | -0.05 | 0.00  | -0.08 | -0.15 |
| 7594 | ZNF43  | 0.00  | 0.00  | 0.03  | 0.10  |
| 7595 | ZNF44  | 0.00  | -0.09 | 0.00  | 0.12  |
| 7596 | ZNF45  | -0.02 | 0.00  | -0.03 | -0.11 |
| 7625 | ZNF74  | -0.02 | 0.00  | 0.08  | -0.14 |
| 7626 | ZNF75  | -0.04 | 0.00  | -0.08 | 0.19  |
| 7629 | ZNF76  | 0.00  | 0.00  | 0.05  | 0.24  |
| 7633 | ZNF79  | -0.02 | 0.00  | 0.00  | 0.05  |
| 7634 | ZNF80  | 0.00  | 0.00  | -0.03 | -0.23 |
| 7637 | ZNF84  | 0.00  | 0.00  | 0.00  | NaN   |
| 7638 | ZNF221 | -0.02 | 0.00  | -0.03 | -0.06 |
| 7639 | ZNF85  | 0.02  | 0.00  | 0.00  | 0.16  |
| 7644 | ZNF91  | 0.00  | 0.00  | 0.00  | NaN   |
| 7673 | ZNF222 | -0.02 | 0.00  | -0.03 | 0.14  |
| 7678 | ZNF124 | 0.07  | 0.00  | 0.03  | 0.17  |
| 7681 | MKRN3  | 0.00  | 0.09  | -0.08 | 0.15  |
| 7690 | ZNF131 | 0.04  | 0.09  | 0.00  | 0.46  |
| 7691 | ZNF132 | 0.00  | 0.18  | 0.00  | -0.01 |
| 7692 | ZNF133 | 0.00  | 0.00  | -0.05 | 0.14  |
| 7693 | ZNF134 | 0.00  | 0.18  | 0.00  | 0.11  |
| 7695 | ZNF136 | 0.00  | -0.09 | 0.00  | 0.07  |
| 7699 | ZNF140 | 0.00  | 0.00  | 0.00  | NaN   |
| 7700 | ZNF141 | -0.02 | 0.00  | -0.05 | 0.14  |
| 7701 | ZNF142 | 0.00  | 0.00  | 0.00  | NaN   |
| 7702 | ZNF143 | 0.00  | 0.00  | -0.08 | 0.00  |
| 7705 | ZNF146 | -0.02 | 0.09  | 0.08  | 0.29  |
| 7707 | ZNF148 | 0.00  | 0.00  | -0.03 | 0.14  |
| 7711 | ZNF155 | -0.02 | 0.00  | -0.03 | 0.21  |
| 7712 | ZNF157 | -0.05 | 0.00  | -0.08 | -0.19 |

|      |         |       |       |       |       |
|------|---------|-------|-------|-------|-------|
| 7718 | ZNF165  | 0.00  | 0.00  | 0.05  | 0.02  |
| 7726 | TRIM26  | 0.00  | 0.00  | 0.05  | 0.12  |
| 7727 | ZNF174  | 0.04  | 0.00  | 0.00  | 0.24  |
| 7728 | ZNF175  | 0.00  | 0.00  | -0.03 | -0.23 |
| 7730 | ZNF177  | 0.00  | 0.00  | 0.00  | NaN   |
| 7733 | ZNF180  | -0.02 | 0.00  | -0.03 | -0.10 |
| 7738 | ZNF184  | 0.00  | 0.00  | 0.05  | 0.20  |
| 7741 | ZNF187  | 0.00  | 0.00  | 0.05  | 0.13  |
| 7743 | ZNF189  | -0.02 | 0.00  | 0.00  | 0.09  |
| 7745 | ZNF192  | 0.00  | 0.00  | 0.05  | -0.03 |
| 7746 | ZNF193  | 0.00  | 0.00  | 0.05  | 0.10  |
| 7748 | ZNF195  | -0.02 | 0.00  | -0.03 | 0.12  |
| 7752 | ZNF200  | 0.04  | 0.00  | 0.00  | 0.10  |
| 7753 | ZNF202  | -0.05 | 0.00  | -0.03 | 0.14  |
| 7755 | ZNF205  | 0.04  | 0.00  | 0.00  | 0.15  |
| 7756 | ZNF207  | 0.00  | 0.27  | 0.00  | 0.22  |
| 7757 | ZNF208  | 0.00  | 0.00  | 0.00  | 0.12  |
| 7761 | ZNF214  | -0.02 | 0.00  | -0.05 | -0.03 |
| 7762 | ZNF215  | -0.02 | 0.00  | -0.05 | -0.04 |
| 7764 | ZNF217  | 0.11  | 0.00  | 0.05  | 0.32  |
| 7766 | ZNF223  | -0.02 | 0.00  | -0.03 | 0.37  |
| 7768 | ZNF225  | -0.02 | 0.00  | -0.03 | -0.14 |
| 7769 | ZNF226  | -0.02 | 0.00  | -0.03 | -0.10 |
| 7773 | ZNF230  | -0.02 | 0.00  | -0.03 | 0.09  |
| 7775 | ZNF232  | -0.04 | 0.00  | 0.00  | 0.20  |
| 7776 | ZNF236  | -0.02 | -0.09 | 0.00  | 0.12  |
| 7781 | SLC30A3 | 0.00  | 0.00  | 0.00  | NaN   |
| 7782 | SLC30A4 | -0.04 | 0.00  | -0.11 | -0.08 |
| 7783 | ZP2     | 0.02  | 0.00  | 0.00  | 0.22  |
| 7786 | MAP3K12 | 0.02  | 0.09  | -0.03 | 0.40  |
| 7791 | ZYX     | 0.02  | 0.00  | 0.00  | 0.06  |
| 7799 | PRDM2   | -0.02 | 0.00  | 0.00  | 0.20  |
| 7803 | PTP4A1  | 0.00  | 0.00  | 0.05  | 0.48  |
| 7804 | LRP8    | 0.00  | 0.00  | 0.00  | 0.16  |
| 7805 | LAPTM5  | -0.02 | 0.09  | 0.00  | 0.05  |
| 7813 | EVI5    | -0.02 | 0.00  | -0.03 | 0.19  |
| 7818 | DAP3    | 0.09  | 0.00  | 0.14  | 0.20  |
| 7827 | NPHS2   | 0.04  | 0.00  | 0.03  | -0.28 |
| 7832 | BTG2    | 0.09  | 0.00  | 0.05  | 0.11  |
| 7840 | ALMS1   | 0.00  | 0.00  | 0.00  | NaN   |
| 7841 | GCS1    | 0.00  | 0.00  | 0.00  | NaN   |
| 7846 | TUBA3   | 0.00  | 0.00  | -0.03 | 0.03  |
| 7849 | PAX8    | 0.00  | 0.00  | 0.00  | NaN   |
| 7850 | IL1R2   | 0.02  | 0.00  | 0.00  | 0.07  |
| 7852 | CXCR4   | 0.00  | 0.00  | 0.00  | 0.29  |
| 7855 | FZD5    | 0.00  | 0.00  | 0.00  | NaN   |
| 7857 | SCG2    | 0.00  | 0.00  | 0.00  | NaN   |

|      |          |       |       |       |       |
|------|----------|-------|-------|-------|-------|
| 7862 | BRPF1    | -0.02 | 0.00  | 0.00  | 0.07  |
| 7866 | IFRD2    | 0.00  | 0.00  | 0.00  | NaN   |
| 7867 | MAPKAPK3 | 0.00  | 0.00  | 0.00  | NaN   |
| 7869 | SEMA3B   | 0.00  | 0.00  | 0.00  | NaN   |
| 7873 | ARMET    | 0.00  | 0.00  | 0.00  | NaN   |
| 7874 | USP7     | 0.04  | 0.00  | 0.00  | 0.23  |
| 7879 | RAB7     | 0.00  | 0.00  | -0.03 | 0.58  |
| 7881 | KCNAB1   | 0.02  | 0.00  | 0.03  | 0.24  |
| 7884 | SLBP     | -0.02 | 0.00  | 0.00  | 0.23  |
| 7913 | DEK      | 0.00  | 0.00  | 0.08  | 0.19  |
| 7915 | ALDH5A1  | 0.00  | 0.00  | 0.03  | 0.16  |
| 7916 | BAT2     | 0.00  | 0.00  | 0.05  | 0.09  |
| 7917 | BAT3     | 0.00  | 0.00  | 0.05  | 0.20  |
| 7919 | BAT1     | 0.00  | 0.00  | 0.05  | 0.13  |
| 7936 | RDBP     | 0.00  | 0.00  | 0.05  | 0.14  |
| 7941 | PLA2G7   | 0.00  | 0.00  | 0.05  | 0.06  |
| 7957 | EPM2A    | 0.02  | 0.00  | 0.00  | 0.14  |
| 7965 | JTV1     | 0.00  | 0.00  | 0.00  | NaN   |
| 7975 | MAFK     | 0.11  | 0.00  | 0.24  | 0.08  |
| 7976 | FZD3     | -0.13 | 0.00  | -0.19 | 0.40  |
| 7978 | MTERF    | 0.02  | 0.00  | 0.05  | 0.24  |
| 7980 | TFPI2    | 0.02  | 0.00  | 0.00  | 0.01  |
| 7982 | ST7      | 0.00  | 0.00  | -0.03 | 0.10  |
| 7984 | ARHGEF5  | 0.00  | 0.00  | -0.05 | 0.09  |
| 7988 | ZNF212   | 0.02  | 0.00  | 0.00  | 0.20  |
| 8000 | PSCA     | 0.16  | 0.09  | 0.38  | -0.02 |
| 8001 | GLRA3    | -0.02 | 0.00  | -0.05 | 0.12  |
| 8013 | NR4A3    | -0.02 | 0.00  | 0.00  | 0.14  |
| 8019 | BRD3     | 0.02  | 0.00  | 0.00  | 0.10  |
| 8021 | NUP214   | 0.02  | 0.00  | 0.03  | 0.12  |
| 8022 | LHX3     | 0.02  | 0.00  | 0.03  | -0.11 |
| 8027 | STAM     | -0.02 | 0.00  | 0.08  | 0.17  |
| 8028 | MLLT10   | -0.02 | 0.00  | 0.03  | 0.31  |
| 8029 | CUBN     | -0.02 | 0.00  | 0.08  | 0.09  |
| 8031 | NCOA4    | -0.02 | 0.00  | 0.00  | 0.00  |
| 8034 | SLC25A16 | -0.02 | 0.00  | -0.03 | 0.03  |
| 8036 | SHOC2    | -0.04 | 0.00  | 0.00  | 0.22  |
| 8038 | ADAM12   | -0.04 | 0.00  | 0.00  | 0.01  |
| 8048 | CSRP3    | 0.00  | 0.00  | -0.05 | 0.01  |
| 8050 | PDX1     | -0.05 | 0.09  | -0.08 | -0.18 |
| 8061 | FOSL1    | 0.02  | 0.00  | 0.03  | 0.00  |
| 8065 | CUL5     | -0.07 | -0.09 | 0.00  | 0.12  |
| 8073 | PTP4A2   | 0.02  | 0.09  | 0.00  | 0.21  |
| 8074 | FGF23    | -0.02 | 0.09  | 0.08  | -0.24 |
| 8078 | USP5     | -0.02 | 0.09  | 0.05  | 0.07  |
| 8079 | MLF2     | -0.02 | 0.09  | 0.05  | 0.30  |
| 8082 | SSPN     | 0.00  | -0.09 | 0.08  | 0.35  |

|      |          |       |       |       |       |
|------|----------|-------|-------|-------|-------|
| 8085 | MLL2     | 0.00  | 0.00  | 0.00  | NaN   |
| 8087 | FXR1     | 0.04  | 0.00  | 0.00  | 0.36  |
| 8092 | CART1    | 0.00  | 0.00  | 0.00  | NaN   |
| 8099 | CDK2AP1  | 0.02  | 0.00  | 0.00  | 0.05  |
| 8106 | PABPN1   | 0.00  | 0.00  | 0.00  | 0.14  |
| 8111 | GPR68    | -0.02 | 0.00  | 0.03  | 0.03  |
| 8115 | TCL1A    | -0.04 | 0.00  | -0.03 | 0.12  |
| 8120 | AP3B2    | 0.00  | 0.00  | -0.03 | 0.00  |
| 8125 | ANP32A   | 0.00  | 0.00  | -0.05 | 0.02  |
| 8139 | GAN      | -0.09 | 0.00  | 0.00  | 0.10  |
| 8140 | SLC7A5   | -0.07 | 0.00  | 0.00  | 0.18  |
| 8148 | TAF15    | -0.02 | 0.00  | 0.03  | -0.02 |
| 8161 | COIL     | 0.15  | 0.00  | 0.03  | 0.47  |
| 8165 | AKAP1    | 0.15  | 0.09  | 0.03  | 0.41  |
| 8170 | SLC14A2  | 0.00  | -0.09 | -0.03 | 0.13  |
| 8175 | SF3A2    | 0.00  | 0.00  | -0.03 | 0.21  |
| 8178 | ELL      | 0.02  | 0.00  | 0.00  | 0.13  |
| 8187 | ZNF239   | 0.00  | 0.09  | -0.03 | -0.02 |
| 8190 | MIA      | 0.00  | 0.00  | 0.00  | 0.20  |
| 8192 | CLPP     | 0.00  | -0.09 | 0.00  | 0.09  |
| 8195 | MKKS     | 0.00  | 0.00  | -0.05 | 0.15  |
| 8200 | GDF5     | 0.05  | 0.00  | 0.00  | -0.02 |
| 8202 | NCOA3    | 0.04  | 0.00  | 0.03  | 0.32  |
| 8204 | NRIP1    | -0.05 | -0.18 | 0.05  | 0.14  |
| 8208 | CHAF1B   | 0.00  | 0.00  | 0.00  | -0.03 |
| 8209 | C21orf33 | 0.00  | 0.00  | 0.00  | 0.40  |
| 8214 | DGCR6    | -0.02 | 0.00  | 0.03  | 0.01  |
| 8216 | LZTR1    | -0.02 | 0.00  | 0.03  | 0.07  |
| 8218 | CLTCL1   | -0.02 | 0.00  | 0.03  | 0.06  |
| 8224 | SYN3     | -0.02 | 0.00  | 0.03  | 0.22  |
| 8237 | USP11    | -0.05 | 0.00  | -0.08 | 0.18  |
| 8239 | USP9X    | -0.05 | 0.00  | -0.11 | 0.32  |
| 8241 | RBM10    | -0.05 | 0.00  | -0.08 | 0.08  |
| 8269 | CXorf12  | 0.00  | 0.00  | -0.03 | 0.29  |
| 8277 | TKTL1    | 0.00  | 0.00  | -0.03 | -0.02 |
| 8287 | USP9Y    | 0.02  | 0.00  | -0.03 | 0.10  |
| 8288 | EPX      | 0.15  | 0.00  | 0.03  | -0.08 |
| 8291 | DYSF     | 0.02  | 0.00  | 0.00  | -0.01 |
| 8292 | COLQ     | -0.02 | 0.00  | 0.00  | 0.18  |
| 8295 | TRRAP    | 0.02  | 0.00  | 0.00  | 0.16  |
| 8301 | PICALM   | -0.02 | 0.00  | 0.00  | 0.25  |
| 8302 | KLRC4    | 0.00  | -0.18 | 0.08  | -0.09 |
| 8303 | SNN      | 0.04  | 0.00  | 0.00  | 0.10  |
| 8309 | ACOX2    | -0.04 | 0.00  | 0.00  | 0.03  |
| 8310 | ACOX3    | -0.02 | 0.00  | 0.00  | 0.01  |
| 8312 | AXIN1    | 0.05  | 0.18  | 0.05  | 0.27  |
| 8314 | BAP1     | 0.00  | 0.00  | 0.00  | NaN   |

|      |          |       |       |       |       |
|------|----------|-------|-------|-------|-------|
| 8315 | BRAP     | 0.00  | 0.00  | 0.00  | NaN   |
| 8318 | CDC45L   | -0.02 | 0.00  | 0.05  | -0.02 |
| 8321 | FZD1     | 0.02  | 0.00  | 0.05  | 0.38  |
| 8322 | FZD4     | -0.02 | 0.00  | 0.00  | 0.30  |
| 8323 | FZD6     | 0.22  | 0.09  | 0.32  | 0.34  |
| 8324 | FZD7     | 0.00  | 0.00  | 0.00  | NaN   |
| 8328 | GFI1B    | 0.02  | 0.00  | 0.00  | 0.06  |
| 8372 | HYAL3    | 0.00  | 0.00  | 0.00  | NaN   |
| 8379 | MAD1L1   | 0.04  | 0.09  | 0.19  | 0.12  |
| 8382 | NME5     | 0.00  | 0.00  | -0.03 | 0.08  |
| 8387 | OR1E1    | -0.05 | 0.00  | 0.00  | -0.04 |
| 8388 | OR1E2    | -0.05 | 0.00  | 0.00  | -0.01 |
| 8390 | OR1G1    | -0.05 | 0.00  | 0.00  | 0.12  |
| 8394 | PIP5K1A  | 0.07  | 0.09  | 0.19  | 0.17  |
| 8395 | PIP5K1B  | -0.02 | 0.00  | -0.03 | 0.09  |
| 8396 | PIP5K2B  | 0.00  | 0.45  | 0.05  | 0.66  |
| 8398 | PLA2G6   | -0.04 | 0.00  | 0.03  | 0.30  |
| 8399 | PLA2G10  | 0.02  | 0.00  | 0.00  | 0.08  |
| 8402 | SLC25A11 | -0.04 | 0.00  | 0.00  | 0.18  |
| 8403 | SOX14    | 0.02  | 0.00  | 0.00  | 0.09  |
| 8404 | SPARCL1  | -0.04 | 0.00  | -0.03 | -0.01 |
| 8405 | SPOP     | 0.11  | 0.09  | 0.03  | 0.43  |
| 8406 | SRPX     | -0.05 | 0.00  | -0.11 | -0.02 |
| 8408 | ULK1     | 0.00  | -0.09 | 0.00  | -0.11 |
| 8409 | UXT      | -0.05 | 0.00  | -0.08 | 0.27  |
| 8411 | EEA1     | 0.00  | 0.09  | 0.00  | 0.08  |
| 8412 | BCAR3    | -0.02 | 0.00  | 0.00  | 0.05  |
| 8416 | ANXA9    | 0.07  | 0.09  | 0.16  | -0.06 |
| 8417 | STX7     | -0.02 | 0.00  | 0.08  | 0.36  |
| 8419 | BFSP2    | 0.00  | 0.00  | 0.00  | NaN   |
| 8424 | BBOX1    | 0.00  | 0.00  | -0.03 | 0.02  |
| 8425 | LTBP4    | 0.00  | 0.09  | 0.11  | 0.22  |
| 8427 | ZNF282   | 0.02  | 0.00  | 0.00  | 0.02  |
| 8428 | STK24    | -0.02 | 0.09  | -0.05 | 0.27  |
| 8431 | NROB2    | -0.04 | 0.00  | 0.00  | -0.05 |
| 8433 | UTF1     | 0.00  | 0.00  | 0.03  | 0.12  |
| 8434 | RECK     | 0.00  | 0.00  | 0.00  | 0.19  |
| 8435 | SOAT2    | 0.02  | 0.00  | -0.03 | 0.10  |
| 8436 | SDPR     | 0.00  | 0.00  | 0.00  | NaN   |
| 8437 | RASAL1   | 0.02  | 0.00  | 0.00  | 0.05  |
| 8438 | RAD54L   | 0.00  | 0.00  | 0.03  | 0.17  |
| 8439 | NSMAF    | 0.15  | 0.00  | 0.14  | 0.35  |
| 8440 | NCK2     | 0.00  | 0.00  | 0.00  | NaN   |
| 8443 | GNPAT    | 0.09  | 0.00  | 0.03  | -0.01 |
| 8444 | DYRK3    | 0.07  | 0.00  | 0.00  | 0.12  |
| 8445 | DYRK2    | 0.02  | 0.00  | 0.00  | 0.20  |
| 8446 | DUSP11   | 0.00  | 0.00  | 0.00  | NaN   |

|      |          |       |       |       |       |
|------|----------|-------|-------|-------|-------|
| 8450 | CUL4B    | -0.05 | 0.00  | -0.08 | 0.13  |
| 8451 | CUL4A    | 0.00  | 0.00  | 0.00  | 0.31  |
| 8452 | CUL3     | 0.00  | 0.00  | 0.00  | NaN   |
| 8453 | CUL2     | -0.02 | 0.00  | 0.03  | 0.19  |
| 8454 | CUL1     | 0.02  | 0.00  | 0.00  | 0.03  |
| 8455 | ATRN     | 0.02  | 0.00  | -0.03 | 0.11  |
| 8458 | TTF2     | 0.02  | 0.00  | -0.03 | 0.07  |
| 8459 | TPST2    | -0.05 | -0.09 | 0.03  | 0.03  |
| 8460 | TPST1    | 0.00  | 0.00  | 0.05  | -0.17 |
| 8464 | SUPT3H   | 0.00  | 0.00  | 0.05  | 0.14  |
| 8467 | SMARCA5  | 0.00  | 0.00  | 0.00  | NaN   |
| 8468 | FKBP6    | 0.02  | 0.00  | 0.03  | -0.18 |
| 8473 | OGT      | -0.04 | 0.00  | -0.08 | 0.27  |
| 8477 | GPR65    | -0.04 | 0.00  | 0.00  | 0.25  |
| 8480 | RAE1     | 0.05  | 0.00  | 0.05  | 0.58  |
| 8481 | OFD1     | -0.05 | -0.09 | -0.14 | 0.28  |
| 8482 | SEMA7A   | 0.00  | 0.00  | 0.00  | NaN   |
| 8483 | CILP     | 0.00  | 0.09  | -0.05 | -0.01 |
| 8487 | SIP1     | 0.00  | 0.00  | -0.03 | 0.26  |
| 8490 | RGS5     | 0.05  | 0.00  | 0.14  | 0.18  |
| 8491 | MAP4K3   | 0.00  | 0.00  | 0.00  | NaN   |
| 8492 | PRSS12   | 0.00  | 0.00  | -0.03 | 0.05  |
| 8493 | PPM1D    | 0.20  | 0.18  | 0.03  | 0.60  |
| 8495 | PPFIBP2  | -0.02 | 0.00  | -0.05 | 0.14  |
| 8496 | PPFIBP1  | -0.02 | -0.09 | 0.03  | 0.19  |
| 8498 | RANBP3   | 0.00  | -0.09 | 0.00  | 0.12  |
| 8499 | PPFIA2   | 0.00  | 0.00  | 0.00  | NaN   |
| 8500 | PPFIA1   | 0.18  | 0.09  | 0.03  | 0.41  |
| 8502 | PKP4     | -0.02 | 0.00  | 0.03  | 0.16  |
| 8503 | PIK3R3   | 0.00  | 0.00  | 0.03  | 0.02  |
| 8504 | PEX3     | 0.00  | 0.00  | 0.08  | 0.56  |
| 8505 | PARG     | -0.02 | 0.00  | -0.03 | 0.04  |
| 8506 | CNTNAP1  | -0.04 | 0.00  | 0.00  | 0.26  |
| 8507 | ENC1     | 0.00  | 0.09  | -0.14 | 0.22  |
| 8508 | NIPSNAP1 | 0.00  | 0.00  | 0.03  | 0.28  |
| 8509 | NDST2    | 0.04  | 0.00  | 0.00  | 0.30  |
| 8513 | LIPF     | -0.04 | 0.00  | -0.11 | 0.02  |
| 8514 | KCNAB2   | -0.02 | 0.00  | 0.00  | 0.21  |
| 8515 | ITGA10   | 0.05  | 0.00  | 0.08  | -0.01 |
| 8516 | ITGA8    | -0.02 | 0.00  | 0.11  | 0.11  |
| 8517 | IKBKG    | -0.04 | 0.00  | -0.08 | 0.18  |
| 8518 | IKBKAP   | -0.02 | 0.00  | 0.00  | 0.08  |
| 8519 | IFITM1   | 0.00  | 0.09  | 0.00  | 0.06  |
| 8520 | HAT1     | -0.02 | 0.00  | 0.00  | 0.00  |
| 8522 | GAS7     | -0.07 | 0.00  | 0.00  | 0.14  |
| 8525 | DGKZ     | -0.02 | 0.00  | -0.03 | 0.43  |
| 8526 | DGKE     | 0.15  | 0.00  | 0.03  | 0.10  |

|      |           |       |       |       |       |
|------|-----------|-------|-------|-------|-------|
| 8527 | DGKD      | 0.00  | 0.00  | 0.00  | NaN   |
| 8528 | DDO       | 0.00  | 0.00  | 0.00  | 0.10  |
| 8529 | CYP4F2    | 0.00  | 0.00  | 0.00  | NaN   |
| 8530 | CST7      | 0.02  | 0.00  | -0.03 | 0.00  |
| 8531 | CSDA      | 0.00  | -0.18 | 0.08  | 0.27  |
| 8532 | CPZ       | -0.02 | 0.00  | 0.00  | -0.07 |
| 8533 | COPS3     | -0.07 | 0.00  | 0.00  | 0.08  |
| 8534 | CHST1     | -0.02 | 0.00  | -0.03 | -0.08 |
| 8535 | CBX4      | 0.04  | 0.00  | 0.00  | 0.19  |
| 8536 | CAMK1     | -0.02 | 0.00  | 0.00  | 0.15  |
| 8537 | BCAS1     | 0.07  | 0.09  | 0.05  | 0.15  |
| 8538 | BARX2     | -0.05 | 0.00  | -0.03 | 0.09  |
| 8539 | API5      | 0.00  | 0.00  | -0.08 | 0.24  |
| 8540 | AGPS      | 0.02  | 0.00  | 0.00  | -0.10 |
| 8541 | PPFIA3    | 0.00  | 0.00  | -0.03 | -0.07 |
| 8542 | APOL1     | -0.02 | 0.00  | 0.03  | -0.11 |
| 8543 | LMO4      | -0.02 | 0.00  | -0.03 | 0.10  |
| 8544 | PIR       | -0.05 | 0.00  | -0.14 | -0.04 |
| 8545 | CGGBP1    | -0.05 | 0.00  | 0.03  | 0.29  |
| 8546 | AP3B1     | 0.00  | 0.09  | -0.14 | 0.33  |
| 8547 | FCN3      | -0.02 | 0.00  | 0.00  | -0.09 |
| 8548 | BLZF1     | 0.02  | 0.00  | 0.05  | 0.11  |
| 8550 | MAPKAPK5  | 0.00  | 0.00  | 0.00  | NaN   |
| 8553 | BHLHB2    | -0.02 | 0.00  | 0.00  | -0.02 |
| 8554 | PIAS1     | 0.00  | 0.00  | -0.05 | 0.20  |
| 8555 | CDC14B    | -0.02 | 0.00  | 0.00  | 0.39  |
| 8556 | CDC14A    | -0.02 | 0.00  | -0.03 | 0.00  |
| 8557 | TCAP      | 0.02  | 0.91  | 0.05  | 0.23  |
| 8558 | CDK10     | -0.04 | 0.00  | 0.00  | 0.04  |
| 8562 | DENR      | 0.02  | 0.00  | 0.00  | 0.28  |
| 8564 | KMO       | 0.07  | 0.00  | 0.05  | 0.19  |
| 8565 | YARS      | 0.00  | 0.00  | 0.00  | NaN   |
| 8566 | PDXK      | 0.00  | 0.00  | 0.00  | 0.19  |
| 8567 | MADD      | -0.02 | 0.00  | -0.03 | 0.17  |
| 8568 | D21S2056E | 0.00  | 0.00  | 0.00  | 0.07  |
| 8569 | MKNK1     | 0.00  | 0.00  | 0.00  | 0.00  |
| 8570 | KHSRP     | 0.00  | -0.09 | 0.00  | 0.08  |
| 8573 | CASK      | -0.05 | 0.00  | -0.11 | 0.03  |
| 8574 | AKR7A2    | 0.00  | 0.00  | 0.00  | NaN   |
| 8575 | PRKRA     | 0.00  | 0.00  | 0.00  | NaN   |
| 8576 | STK16     | 0.00  | 0.00  | 0.00  | NaN   |
| 8577 | TMEFF1    | -0.02 | 0.00  | 0.00  | 0.06  |
| 8600 | TNFSF11   | -0.05 | 0.00  | -0.05 | 0.11  |
| 8601 | RGS20     | 0.13  | 0.00  | 0.14  | 0.00  |
| 8604 | SLC25A12  | -0.02 | 0.00  | 0.00  | 0.26  |
| 8605 | PLA2G4C   | 0.00  | 0.00  | -0.03 | -0.06 |
| 8607 | RUVBL1    | 0.00  | 0.00  | -0.03 | 0.35  |

|      |           |       |       |       |       |
|------|-----------|-------|-------|-------|-------|
| 8609 | KLF7      | 0.00  | 0.00  | 0.00  | NaN   |
| 8611 | PPAP2A    | 0.00  | 0.00  | -0.11 | 0.15  |
| 8612 | PPAP2C    | 0.00  | 0.00  | -0.03 | -0.05 |
| 8613 | PPAP2B    | 0.00  | 0.00  | 0.00  | 0.26  |
| 8614 | STC2      | 0.00  | 0.00  | -0.03 | 0.08  |
| 8618 | CADPS     | -0.05 | 0.00  | 0.00  | 0.06  |
| 8620 | NPFF      | 0.02  | 0.09  | -0.03 | 0.13  |
| 8621 | CDC2L5    | -0.02 | 0.00  | 0.03  | 0.25  |
| 8624 | DSCR2     | 0.00  | 0.00  | 0.00  | 0.14  |
| 8625 | RFXANK    | 0.02  | 0.00  | 0.00  | 0.15  |
| 8629 | JRK       | 0.16  | 0.09  | 0.38  | 0.30  |
| 8633 | UNC5C     | -0.04 | 0.00  | 0.00  | -0.01 |
| 8634 | RTCD1     | -0.02 | 0.00  | -0.03 | 0.07  |
| 8636 | SSNA1     | 0.02  | 0.00  | 0.03  | 0.03  |
| 8638 | OASL      | 0.00  | 0.00  | 0.00  | NaN   |
| 8639 | AOC3      | -0.04 | 0.00  | 0.00  | 0.30  |
| 8643 | PTCH2     | 0.00  | 0.00  | 0.03  | 0.18  |
| 8644 | AKR1C3    | 0.00  | 0.00  | 0.08  | 0.11  |
| 8645 | KCNK5     | 0.02  | 0.00  | 0.05  | 0.19  |
| 8646 | CHRD      | 0.04  | 0.00  | 0.05  | 0.07  |
| 8647 | ABCB11    | 0.00  | 0.00  | 0.03  | -0.08 |
| 8648 | NCOA1     | -0.02 | 0.00  | 0.00  | 0.26  |
| 8649 | MAP2K1IP1 | -0.02 | 0.00  | 0.03  | 0.10  |
| 8650 | NUMB      | -0.02 | 0.00  | -0.03 | 0.30  |
| 8654 | PDE5A     | 0.00  | 0.00  | -0.03 | -0.03 |
| 8658 | TNKS      | -0.18 | -0.18 | -0.19 | 0.22  |
| 8660 | IRS2      | 0.00  | 0.00  | -0.03 | 0.41  |
| 8661 | EIF3S10   | -0.04 | 0.00  | 0.00  | 0.10  |
| 8662 | EIF3S9    | 0.00  | 0.00  | 0.05  | 0.33  |
| 8664 | EIF3S7    | -0.04 | 0.00  | 0.03  | -0.02 |
| 8665 | EIF3S5    | 0.00  | 0.00  | -0.08 | 0.00  |
| 8666 | EIF3S4    | 0.00  | 0.00  | 0.00  | NaN   |
| 8667 | EIF3S3    | 0.22  | 0.18  | 0.35  | 0.39  |
| 8668 | EIF3S2    | 0.02  | 0.00  | 0.00  | 0.21  |
| 8669 | EIF3S1    | -0.04 | 0.00  | -0.14 | 0.26  |
| 8671 | SLC4A4    | -0.02 | 0.00  | 0.00  | 0.03  |
| 8672 | EIF4G3    | 0.00  | 0.00  | 0.00  | NaN   |
| 8673 | VAMP8     | 0.02  | 0.00  | 0.00  | 0.05  |
| 8674 | VAMP4     | 0.00  | 0.00  | 0.05  | 0.20  |
| 8676 | STX11     | 0.02  | 0.00  | 0.00  | 0.05  |
| 8677 | STX10     | 0.00  | -0.09 | 0.00  | 0.19  |
| 8678 | BECN1     | -0.04 | 0.00  | 0.00  | 0.00  |
| 8681 | PLA2G4B   | -0.04 | 0.09  | -0.14 | 0.13  |
| 8682 | PEA15     | 0.05  | 0.00  | 0.14  | 0.28  |
| 8683 | SFRS9     | 0.02  | 0.00  | 0.00  | 0.13  |
| 8685 | MARCO     | 0.00  | 0.00  | 0.00  | NaN   |
| 8690 | JRKL      | -0.09 | -0.09 | 0.00  | 0.13  |



|      |          |       |       |       |       |
|------|----------|-------|-------|-------|-------|
| 8692 | HYAL2    | 0.00  | 0.00  | 0.00  | NaN   |
| 8697 | CDC23    | 0.00  | 0.00  | -0.03 | 0.16  |
| 8702 | B4GALT4  | 0.00  | 0.00  | -0.03 | -0.03 |
| 8703 | B4GALT3  | 0.11  | 0.00  | 0.14  | 0.49  |
| 8704 | B4GALT2  | 0.00  | 0.00  | 0.03  | 0.22  |
| 8705 | B3GALT4  | 0.00  | 0.00  | 0.05  | 0.07  |
| 8708 | B3GALT1  | 0.00  | 0.00  | 0.03  | -0.18 |
| 8710 | SERPINB7 | -0.02 | -0.09 | 0.00  | 0.11  |
| 8711 | TNK1     | -0.05 | 0.00  | 0.00  | -0.05 |
| 8714 | ABCC3    | 0.15  | 0.18  | 0.03  | -0.04 |
| 8715 | NOL4     | 0.02  | -0.09 | -0.03 | -0.03 |
| 8717 | TRADD    | -0.04 | 0.00  | 0.00  | 0.06  |
| 8720 | MBTPS1   | -0.09 | 0.00  | 0.00  | 0.00  |
| 8721 | EDF1     | 0.02  | 0.00  | 0.03  | 0.11  |
| 8722 | CTSF     | 0.05  | 0.00  | 0.03  | 0.17  |
| 8723 | SNX4     | 0.00  | 0.00  | -0.03 | 0.33  |
| 8724 | SNX3     | 0.04  | 0.00  | 0.00  | 0.41  |
| 8726 | EED      | -0.02 | 0.09  | 0.00  | 0.24  |
| 8727 | CTNNA1   | -0.02 | 0.00  | 0.00  | 0.12  |
| 8728 | ADAM19   | 0.00  | 0.00  | 0.00  | NaN   |
| 8729 | GBF1     | 0.00  | 0.00  | -0.03 | 0.18  |
| 8731 | RNMT     | -0.02 | -0.09 | 0.00  | 0.10  |
| 8732 | RNGTT    | -0.02 | 0.00  | -0.05 | 0.25  |
| 8733 | GPAA1    | 0.16  | 0.00  | 0.35  | 0.52  |
| 8735 | MYH13    | -0.07 | 0.00  | 0.00  | -0.04 |
| 8736 | MYOM1    | 0.00  | -0.09 | 0.00  | 0.01  |
| 8737 | RIPK1    | -0.02 | 0.00  | 0.00  | 0.04  |
| 8738 | CRADD    | 0.00  | 0.09  | 0.00  | 0.15  |
| 8739 | HRK      | 0.02  | 0.00  | -0.03 | 0.06  |
| 8740 | TNFSF14  | 0.00  | -0.09 | 0.00  | 0.08  |
| 8742 | TNFSF12  | -0.05 | 0.00  | 0.00  | -0.03 |
| 8743 | TNFSF10  | 0.04  | 0.00  | 0.00  | 0.10  |
| 8744 | TNFSF9   | 0.00  | -0.09 | 0.00  | 0.04  |
| 8745 | ADAM23   | 0.00  | 0.00  | 0.00  | NaN   |
| 8747 | ADAM21   | -0.02 | 0.00  | 0.00  | 0.06  |
| 8748 | ADAM20   | -0.02 | 0.00  | 0.00  | 0.03  |
| 8749 | ADAM18   | 0.04  | 0.09  | 0.05  | 0.01  |
| 8754 | ADAM9    | 0.11  | 0.09  | 0.11  | 0.24  |
| 8756 | ADAM7    | -0.13 | -0.18 | -0.19 | 0.20  |
| 8760 | CDS2     | 0.02  | 0.00  | -0.05 | 0.25  |
| 8761 | PABPC4   | -0.02 | 0.09  | 0.00  | 0.14  |
| 8763 | CD164    | 0.00  | 0.00  | 0.00  | 0.35  |
| 8764 | TNFRSF14 | -0.02 | 0.00  | 0.03  | 0.07  |
| 8766 | RAB11A   | 0.00  | 0.09  | -0.05 | 0.21  |
| 8767 | RIPK2    | 0.15  | 0.00  | 0.16  | 0.25  |
| 8772 | FADD     | 0.18  | 0.09  | 0.03  | 0.45  |
| 8773 | SNAP23   | -0.05 | 0.09  | -0.14 | 0.34  |

|      |           |       |       |       |       |
|------|-----------|-------|-------|-------|-------|
| 8774 | NAPG      | -0.02 | -0.09 | 0.00  | 0.02  |
| 8775 | NAPA      | -0.04 | 0.00  | -0.03 | 0.44  |
| 8776 | MTMR1     | -0.04 | 0.00  | -0.11 | 0.19  |
| 8777 | MPDZ      | -0.05 | 0.00  | -0.03 | 0.23  |
| 8778 | SIGLEC5   | 0.00  | -0.09 | -0.03 | 0.00  |
| 8785 | MATN4     | 0.04  | 0.09  | 0.03  | 0.08  |
| 8786 | RGS11     | 0.05  | 0.18  | 0.05  | 0.21  |
| 8787 | RGS9      | 0.15  | 0.27  | 0.03  | -0.02 |
| 8788 | DLK1      | 0.02  | 0.00  | 0.03  | -0.17 |
| 8789 | FBP2      | -0.02 | 0.00  | 0.00  | 0.03  |
| 8790 | FPGT      | -0.02 | 0.00  | -0.03 | 0.11  |
| 8792 | TNFRSF11A | -0.02 | -0.09 | 0.03  | 0.06  |
| 8793 | TNFRSF10D | -0.13 | -0.18 | -0.22 | -0.13 |
| 8794 | TNFRSF10C | -0.13 | -0.18 | -0.22 | 0.13  |
| 8795 | TNFRSF10B | -0.13 | -0.18 | -0.22 | 0.24  |
| 8796 | SCEL      | -0.04 | -0.09 | -0.14 | -0.04 |
| 8798 | DYRK4     | -0.02 | 0.09  | 0.08  | 0.22  |
| 8799 | PEX11B    | 0.05  | 0.00  | 0.08  | 0.38  |
| 8800 | PEX11A    | 0.02  | 0.00  | -0.05 | 0.05  |
| 8801 | SUCLG2    | -0.05 | 0.00  | 0.00  | 0.25  |
| 8802 | SUCLG1    | -0.02 | 0.00  | 0.00  | 0.06  |
| 8803 | SUCLA2    | -0.07 | 0.00  | -0.14 | 0.16  |
| 8807 | IL18RAP   | 0.00  | 0.00  | 0.00  | NaN   |
| 8808 | IL1RL2    | 0.02  | 0.00  | 0.00  | -0.05 |
| 8809 | IL18R1    | 0.00  | 0.00  | 0.00  | NaN   |
| 8811 | GALR2     | 0.04  | 0.18  | 0.03  | 0.06  |
| 8813 | DPM1      | 0.07  | 0.09  | 0.05  | 0.36  |
| 8814 | CDKL1     | 0.02  | 0.00  | 0.00  | 0.03  |
| 8817 | FGF18     | 0.00  | 0.00  | -0.03 | 0.08  |
| 8818 | DPM2      | 0.02  | 0.00  | 0.00  | 0.22  |
| 8819 | SAP30     | -0.02 | 0.00  | -0.05 | 0.10  |
| 8820 | HESX1     | -0.05 | 0.00  | -0.03 | 0.07  |
| 8821 | INPP4B    | 0.00  | 0.00  | 0.00  | NaN   |
| 8822 | FGF17     | -0.15 | -0.09 | -0.16 | -0.05 |
| 8824 | CES2      | -0.05 | 0.00  | 0.00  | 0.17  |
| 8826 | IQGAP1    | 0.04  | 0.00  | 0.00  | 0.33  |
| 8828 | NRP2      | 0.00  | 0.00  | 0.00  | NaN   |
| 8829 | NRP1      | -0.02 | 0.00  | 0.03  | 0.18  |
| 8832 | CD84      | 0.07  | 0.00  | 0.14  | -0.07 |
| 8833 | GMPS      | 0.02  | 0.00  | 0.03  | 0.28  |
| 8836 | GGH       | 0.13  | 0.00  | 0.14  | 0.37  |
| 8837 | CFLAR     | 0.00  | 0.00  | 0.00  | NaN   |
| 8838 | WISP3     | 0.02  | 0.00  | 0.03  | -0.04 |
| 8839 | WISP2     | 0.02  | 0.09  | 0.03  | 0.00  |
| 8840 | WISP1     | 0.20  | 0.09  | 0.35  | 0.12  |
| 8850 | PCAF      | -0.05 | 0.00  | -0.05 | 0.10  |
| 8851 | CDK5R1    | 0.00  | 0.27  | 0.00  | 0.26  |

|      |          |       |       |       |       |
|------|----------|-------|-------|-------|-------|
| 8852 | AKAP4    | -0.04 | 0.00  | -0.08 | 0.06  |
| 8853 | DDEF2    | -0.02 | 0.00  | 0.00  | -0.01 |
| 8854 | ALDH1A2  | -0.02 | 0.00  | -0.05 | 0.00  |
| 8856 | NR1I2    | 0.00  | 0.00  | -0.03 | -0.16 |
| 8857 | FCGBP    | 0.02  | 0.09  | 0.05  | 0.22  |
| 8858 | PROZ     | 0.00  | 0.00  | 0.00  | 0.21  |
| 8861 | LDB1     | 0.00  | 0.00  | -0.03 | 0.11  |
| 8863 | PER3     | -0.02 | 0.00  | 0.00  | 0.07  |
| 8864 | PER2     | 0.00  | 0.00  | 0.00  | NaN   |
| 8867 | SYNJ1    | 0.00  | 0.00  | -0.03 | 0.23  |
| 8870 | IER3     | 0.02  | 0.00  | 0.05  | 0.06  |
| 8871 | SYNJ2    | -0.02 | 0.00  | -0.03 | 0.23  |
| 8874 | ARHGEF7  | 0.00  | 0.00  | -0.03 | 0.32  |
| 8875 | VNN2     | -0.02 | 0.00  | 0.11  | -0.04 |
| 8876 | VNN1     | -0.02 | 0.00  | 0.11  | -0.02 |
| 8877 | SPHK1    | 0.04  | 0.27  | 0.03  | -0.03 |
| 8878 | SQSTM1   | 0.02  | 0.00  | -0.03 | 0.24  |
| 8879 | SGPL1    | -0.02 | 0.00  | -0.03 | 0.15  |
| 8880 | FUBP1    | -0.02 | 0.00  | -0.03 | -0.04 |
| 8881 | CDC16    | 0.00  | 0.00  | 0.00  | 0.33  |
| 8882 | ZNF259   | -0.09 | 0.00  | 0.00  | 0.10  |
| 8883 | APPBP1   | -0.09 | 0.00  | 0.00  | 0.08  |
| 8884 | SLC5A6   | 0.00  | 0.00  | 0.00  | NaN   |
| 8886 | DDX18    | 0.00  | 0.00  | 0.00  | NaN   |
| 8887 | TAX1BP1  | -0.02 | 0.18  | 0.00  | 0.43  |
| 8888 | MCM3AP   | 0.00  | 0.09  | 0.00  | 0.21  |
| 8891 | EIF2B3   | 0.00  | 0.00  | 0.03  | 0.39  |
| 8892 | EIF2B2   | -0.02 | 0.00  | 0.00  | 0.25  |
| 8893 | EIF2B5   | 0.05  | 0.00  | 0.00  | 0.25  |
| 8894 | EIF2S2   | 0.00  | 0.00  | 0.00  | NaN   |
| 8895 | CPNE3    | 0.15  | 0.00  | 0.14  | 0.35  |
| 8897 | MTMR3    | 0.00  | 0.00  | 0.03  | 0.26  |
| 8898 | MTMR2    | -0.09 | -0.09 | 0.00  | 0.30  |
| 8900 | CCNA1    | -0.05 | 0.00  | -0.11 | 0.03  |
| 8904 | CPNE1    | 0.04  | 0.00  | 0.00  | 0.41  |
| 8905 | AP1S2    | -0.05 | 0.00  | -0.11 | 0.15  |
| 8906 | AP1G2    | -0.02 | 0.00  | 0.00  | -0.01 |
| 8908 | GYG2     | -0.05 | -0.09 | -0.08 | 0.26  |
| 8909 | P11      | 0.00  | 0.00  | 0.00  | NaN   |
| 8910 | SGCE     | 0.02  | 0.00  | -0.03 | 0.05  |
| 8911 | CACNA1I  | -0.04 | 0.00  | -0.03 | -0.02 |
| 8912 | CACNA1H  | 0.04  | 0.18  | 0.03  | 0.11  |
| 8913 | CACNA1G  | 0.15  | 0.18  | 0.03  | 0.06  |
| 8914 | TIMELESS | 0.00  | 0.00  | 0.00  | NaN   |
| 8915 | BCL10    | -0.02 | 0.00  | -0.03 | -0.08 |
| 8916 | HERC3    | -0.04 | 0.00  | -0.03 | 0.03  |
| 8924 | HERC2    | -0.04 | 0.09  | -0.08 | 0.29  |

|      |           |       |       |       |       |
|------|-----------|-------|-------|-------|-------|
| 8925 | HERC1     | 0.00  | 0.09  | -0.08 | 0.19  |
| 8927 | BSN       | 0.00  | 0.00  | 0.00  | NaN   |
| 8930 | MBD4      | 0.00  | 0.00  | -0.03 | 0.61  |
| 8932 | MBD2      | -0.02 | -0.18 | -0.03 | 0.28  |
| 8934 | RAB7L1    | 0.07  | 0.00  | 0.03  | 0.25  |
| 8936 | WASF1     | 0.00  | 0.00  | -0.03 | 0.08  |
| 8938 | BAIAP3    | 0.04  | 0.18  | 0.03  | 0.21  |
| 8939 | FUBP3     | 0.02  | 0.00  | 0.00  | 0.09  |
| 8940 | TOP3B     | -0.02 | 0.00  | 0.03  | 0.10  |
| 8941 | CDK5R2    | 0.00  | 0.00  | 0.00  | NaN   |
| 8942 | KYNU      | 0.00  | 0.00  | 0.00  | NaN   |
| 8943 | AP3D1     | 0.00  | 0.00  | -0.03 | 0.10  |
| 8945 | BTRC      | -0.02 | 0.00  | -0.03 | 0.08  |
| 8971 | H1FX      | 0.00  | 0.00  | -0.03 | 0.50  |
| 8972 | MGAM      | 0.02  | 0.00  | 0.00  | 0.13  |
| 8973 | CHRNA6    | 0.02  | 0.09  | 0.11  | 0.08  |
| 8974 | P4HA2     | 0.00  | 0.00  | -0.03 | 0.00  |
| 8975 | USP13     | 0.04  | 0.00  | 0.03  | 0.38  |
| 8976 | WASL      | 0.00  | 0.00  | -0.03 | 0.05  |
| 8985 | PLOD3     | 0.02  | 0.00  | 0.00  | 0.24  |
| 8986 | RPS6KA4   | 0.00  | 0.00  | 0.03  | 0.11  |
| 8987 | GENX-3414 | -0.02 | 0.00  | 0.00  | -0.04 |
| 8988 | HSPB3     | 0.02  | 0.00  | -0.08 | -0.02 |
| 8991 | SELENBP1  | 0.07  | 0.09  | 0.19  | -0.05 |
| 8994 | LIMD1     | -0.04 | 0.00  | 0.00  | 0.07  |
| 8995 | TNFSF18   | 0.02  | 0.00  | 0.05  | -0.01 |
| 8996 | NOL3      | -0.04 | 0.00  | 0.00  | -0.04 |
| 8999 | CDKL2     | -0.02 | 0.00  | 0.00  | 0.04  |
| 9001 | HAP1      | 0.00  | 0.18  | 0.00  | 0.03  |
| 9013 | TAF1C     | -0.09 | 0.00  | 0.00  | 0.11  |
| 9014 | TAF1B     | -0.02 | 0.00  | 0.00  | 0.03  |
| 9015 | TAF1A     | 0.07  | 0.00  | 0.00  | 0.15  |
| 9016 | SLC25A14  | -0.05 | 0.00  | -0.08 | 0.15  |
| 9019 | MPZL1     | 0.02  | 0.00  | 0.05  | 0.16  |
| 9020 | MAP3K14   | -0.05 | 0.00  | 0.00  | 0.30  |
| 9023 | CH25H     | -0.04 | 0.00  | -0.11 | 0.00  |
| 9025 | RNF8      | 0.02  | 0.00  | 0.08  | 0.11  |
| 9027 | NAT8      | 0.00  | 0.00  | 0.00  | NaN   |
| 9031 | BAZ1B     | 0.02  | 0.00  | 0.05  | 0.22  |
| 9032 | TM4SF5    | -0.04 | 0.00  | 0.00  | 0.18  |
| 9033 | PKD2L1    | -0.02 | 0.00  | -0.03 | 0.14  |
| 9037 | SEMA5A    | 0.02  | 0.18  | 0.00  | -0.16 |
| 9039 | UBE1C     | -0.05 | 0.00  | 0.00  | 0.16  |
| 9040 | UBE2M     | 0.00  | 0.09  | -0.03 | 0.43  |
| 9043 | SPAG9     | 0.15  | 0.09  | 0.03  | 0.47  |
| 9044 | BTAF1     | -0.02 | 0.00  | -0.05 | 0.13  |
| 9045 | RPL14     | -0.04 | 0.00  | 0.00  | 0.08  |

|      |          |       |       |       |       |
|------|----------|-------|-------|-------|-------|
| 9046 | DOK2     | -0.13 | -0.18 | -0.22 | 0.07  |
| 9047 | SH2D2A   | 0.04  | 0.00  | 0.11  | 0.07  |
| 9048 | ARTN     | 0.00  | 0.00  | 0.03  | -0.05 |
| 9049 | AIP      | 0.07  | 0.09  | 0.03  | 0.25  |
| 9050 | PSTPIP2  | 0.00  | -0.09 | -0.03 | 0.03  |
| 9051 | PSTPIP1  | 0.00  | 0.00  | -0.08 | 0.01  |
| 9053 | MAP7     | -0.02 | 0.00  | 0.05  | 0.33  |
| 9054 | NFS1     | 0.04  | 0.00  | 0.00  | 0.37  |
| 9055 | PRC1     | 0.02  | 0.00  | 0.03  | 0.09  |
| 9056 | SLC7A7   | -0.02 | 0.00  | 0.00  | 0.05  |
| 9057 | SLC7A6   | -0.05 | 0.00  | 0.00  | 0.14  |
| 9058 | SLC13A2  | 0.04  | 0.09  | 0.00  | 0.04  |
| 9060 | PAPSS2   | -0.04 | 0.00  | -0.11 | 0.29  |
| 9061 | PAPSS1   | -0.02 | 0.00  | 0.00  | 0.04  |
| 9064 | MAP3K6   | -0.02 | 0.00  | 0.00  | -0.07 |
| 9070 | ASH2L    | 0.16  | 0.09  | 0.11  | 0.69  |
| 9071 | CLDN10   | -0.02 | 0.00  | -0.05 | 0.02  |
| 9074 | CLDN6    | 0.04  | 0.00  | 0.00  | -0.05 |
| 9076 | CLDN1    | 0.02  | 0.00  | 0.00  | 0.03  |
| 9079 | LDB2     | -0.04 | -0.09 | -0.05 | -0.03 |
| 9086 | EIF1AY   | 0.02  | 0.00  | 0.00  | 0.31  |
| 9087 | TMSB4Y   | 0.02  | 0.00  | -0.03 | -0.07 |
| 9088 | PKMYT1   | 0.04  | 0.00  | 0.00  | -0.03 |
| 9090 | PSIP1    | -0.05 | 0.00  | -0.03 | 0.15  |
| 9091 | PIGQ     | 0.04  | 0.18  | 0.05  | 0.07  |
| 9092 | SART1    | 0.02  | 0.00  | 0.03  | 0.18  |
| 9093 | DNAJA3   | 0.04  | 0.00  | 0.00  | 0.13  |
| 9094 | UNC119   | 0.04  | 0.09  | 0.00  | 0.15  |
| 9095 | TBX19    | 0.02  | 0.00  | 0.05  | 0.14  |
| 9097 | USP14    | 0.02  | -0.09 | 0.00  | 0.19  |
| 9098 | USP6     | -0.02 | 0.00  | 0.00  | 0.00  |
| 9099 | USP2     | -0.07 | 0.18  | 0.05  | -0.01 |
| 9100 | USP10    | -0.09 | 0.00  | 0.00  | 0.24  |
| 9101 | USP8     | -0.02 | 0.00  | -0.05 | 0.28  |
| 9104 | RGN      | -0.05 | 0.00  | -0.08 | 0.12  |
| 9107 | MTMR6    | -0.05 | 0.00  | -0.08 | 0.18  |
| 9108 | MTMR7    | -0.16 | -0.18 | -0.22 | -0.02 |
| 9110 | MTMR4    | 0.16  | 0.00  | 0.03  | 0.60  |
| 9111 | NMI      | -0.02 | 0.00  | 0.03  | 0.32  |
| 9112 | MTA1     | -0.02 | 0.00  | 0.08  | 0.11  |
| 9113 | LATS1    | 0.00  | 0.00  | -0.03 | -0.07 |
| 9114 | ATP6V0D1 | -0.04 | 0.00  | 0.00  | 0.07  |
| 9120 | SLC16A6  | 0.13  | 0.18  | 0.03  | 0.30  |
| 9121 | SLC16A5  | 0.05  | 0.27  | 0.05  | 0.19  |
| 9122 | SLC16A4  | 0.00  | 0.00  | -0.03 | 0.16  |
| 9123 | SLC16A3  | -0.02 | 0.09  | 0.08  | 0.15  |
| 9124 | PDLIM1   | -0.02 | 0.00  | -0.05 | 0.07  |

|      |         |       |       |       |       |
|------|---------|-------|-------|-------|-------|
| 9125 | RQCD1   | 0.00  | 0.00  | 0.00  | NaN   |
| 9127 | P2RXL1  | -0.02 | 0.00  | 0.03  | 0.28  |
| 9128 | PRPF4   | -0.02 | 0.00  | 0.00  | -0.04 |
| 9132 | KCNQ4   | 0.00  | 0.00  | 0.00  | NaN   |
| 9133 | CCNB2   | -0.02 | 0.00  | -0.05 | 0.05  |
| 9134 | CCNE2   | 0.20  | 0.09  | 0.24  | 0.41  |
| 9138 | ARHGEF1 | 0.02  | 0.00  | -0.03 | 0.08  |
| 9139 | CBFA2T2 | 0.00  | 0.00  | 0.00  | NaN   |
| 9141 | PDCD5   | 0.00  | 0.00  | 0.05  | 0.00  |
| 9142 | CXorf1  | -0.05 | 0.00  | -0.08 | 0.13  |
| 9143 | SYNGR3  | 0.04  | 0.18  | 0.00  | 0.09  |
| 9144 | SYNGR2  | 0.05  | 0.09  | 0.03  | 0.25  |
| 9145 | SYNGR1  | -0.04 | 0.00  | 0.00  | 0.10  |
| 9146 | HGS     | 0.00  | 0.09  | 0.08  | 0.16  |
| 9147 | SDCCAG1 | 0.02  | 0.00  | 0.00  | 0.34  |
| 9148 | NEURL   | 0.00  | 0.00  | 0.00  | 0.16  |
| 9149 | DYRK1B  | 0.02  | 0.09  | 0.08  | 0.07  |
| 9150 | CTDP1   | -0.02 | -0.09 | 0.00  | -0.04 |
| 9152 | SLC6A5  | 0.00  | 0.00  | -0.05 | -0.10 |
| 9153 | SLC28A2 | -0.04 | 0.00  | -0.11 | 0.10  |
| 9154 | SLC28A1 | 0.02  | 0.00  | -0.03 | 0.00  |
| 9156 | EXO1    | 0.07  | 0.00  | 0.05  | -0.02 |
| 9158 | FIBP    | 0.02  | 0.00  | 0.03  | 0.16  |
| 9159 | PCSK7   | -0.07 | 0.00  | 0.00  | 0.03  |
| 9162 | DGKI    | 0.02  | 0.00  | 0.03  | -0.06 |
| 9166 | EBAG9   | 0.18  | 0.09  | 0.27  | 0.31  |
| 9167 | COX7A2L | 0.00  | 0.00  | 0.00  | NaN   |
| 9168 | TMSB10  | 0.00  | 0.00  | 0.00  | NaN   |
| 9169 | SFRS2IP | 0.00  | 0.00  | 0.00  | NaN   |
| 9170 | EDG4    | 0.02  | 0.00  | 0.00  | 0.24  |
| 9172 | MYOM2   | -0.18 | -0.18 | -0.19 | 0.05  |
| 9173 | IL1RL1  | 0.00  | 0.00  | 0.00  | NaN   |
| 9175 | MAP3K13 | 0.04  | 0.00  | 0.00  | 0.21  |
| 9177 | HTR3B   | -0.07 | 0.00  | 0.00  | 0.19  |
| 9179 | AP4M1   | 0.02  | 0.00  | 0.00  | 0.01  |
| 9180 | OSMR    | 0.04  | 0.09  | 0.00  | 0.07  |
| 9181 | ARHGEF2 | 0.09  | 0.00  | 0.14  | 0.08  |
| 9182 | PAMCI   | 0.00  | 0.00  | 0.00  | NaN   |
| 9183 | ZW10    | -0.07 | 0.00  | 0.00  | 0.15  |
| 9184 | BUB3    | -0.04 | 0.00  | 0.03  | 0.09  |
| 9185 | REPS2   | -0.05 | 0.00  | -0.11 | 0.20  |
| 9187 | SLC24A1 | 0.02  | 0.09  | -0.05 | 0.32  |
| 9188 | DDX21   | -0.04 | 0.00  | 0.00  | 0.14  |
| 9191 | DEDD    | 0.11  | 0.00  | 0.14  | 0.38  |
| 9194 | SLC16A7 | 0.00  | 0.00  | 0.00  | NaN   |
| 9196 | KCNAB3  | -0.05 | 0.00  | 0.00  | 0.05  |
| 9200 | PTPLA   | -0.02 | 0.00  | 0.08  | 0.00  |

|      |          |       |       |       |       |
|------|----------|-------|-------|-------|-------|
| 9201 | DCAMKL1  | -0.05 | 0.00  | -0.11 | 0.12  |
| 9208 | LRRFIP1  | 0.04  | 0.00  | 0.00  | 0.42  |
| 9209 | LRRFIP2  | 0.02  | 0.00  | 0.00  | 0.46  |
| 9210 | BMP15    | -0.04 | 0.00  | -0.08 | -0.06 |
| 9211 | LGI1     | -0.02 | 0.00  | -0.05 | -0.05 |
| 9215 | LARGE    | -0.02 | 0.00  | 0.03  | 0.15  |
| 9217 | VAPB     | 0.07  | 0.09  | 0.05  | 0.43  |
| 9218 | VAPA     | -0.02 | -0.09 | 0.00  | 0.19  |
| 9221 | NOLC1    | 0.00  | 0.00  | -0.03 | 0.22  |
| 9227 | LRAT     | -0.02 | 0.00  | -0.03 | 0.03  |
| 9228 | DLGAP2   | -0.18 | -0.18 | -0.16 | 0.04  |
| 9229 | DLGAP1   | 0.00  | -0.09 | 0.00  | 0.13  |
| 9230 | RAB11B   | 0.00  | -0.09 | 0.00  | -0.03 |
| 9231 | DLG5     | -0.02 | 0.00  | 0.03  | 0.16  |
| 9232 | PTTG1    | 0.00  | 0.00  | -0.03 | -0.03 |
| 9240 | PNMA1    | -0.02 | 0.00  | 0.00  | 0.10  |
| 9242 | MSC      | 0.15  | 0.00  | 0.08  | -0.03 |
| 9244 | CRLF1    | 0.02  | 0.00  | 0.00  | 0.06  |
| 9245 | GCNT3    | -0.02 | 0.00  | -0.05 | 0.16  |
| 9246 | UBE2L6   | 0.02  | 0.00  | 0.05  | 0.08  |
| 9248 | GPR50    | -0.04 | 0.00  | -0.11 | 0.04  |
| 9252 | RPS6KA5  | -0.02 | 0.00  | 0.03  | 0.18  |
| 9254 | CACNA2D2 | 0.00  | 0.00  | 0.00  | NaN   |
| 9255 | SCYE1    | -0.02 | 0.00  | 0.00  | 0.00  |
| 9258 | MFHAS1   | -0.16 | -0.18 | -0.19 | 0.05  |
| 9261 | MAPKAPK2 | 0.09  | 0.00  | 0.00  | 0.16  |
| 9262 | STK17B   | 0.02  | 0.00  | 0.00  | -0.17 |
| 9263 | STK17A   | -0.02 | 0.00  | 0.05  | 0.07  |
| 9265 | PSCD3    | 0.00  | 0.00  | 0.03  | -0.08 |
| 9266 | PSCD2    | 0.00  | 0.00  | -0.03 | 0.43  |
| 9267 | PSCD1    | 0.02  | 0.18  | 0.03  | 0.27  |
| 9271 | PIWIL1   | 0.00  | 0.00  | 0.00  | NaN   |
| 9274 | BCL7C    | 0.07  | 0.09  | 0.00  | 0.26  |
| 9275 | BCL7B    | 0.02  | 0.00  | 0.05  | 0.19  |
| 9276 | COPB2    | 0.02  | 0.00  | 0.00  | 0.27  |
| 9282 | CRSP2    | -0.05 | 0.00  | -0.11 | 0.24  |
| 9289 | GPR56    | -0.05 | 0.00  | 0.03  | 0.19  |
| 9294 | EDG5     | 0.00  | 0.00  | 0.00  | NaN   |
| 9295 | SFRS11   | -0.02 | 0.00  | -0.03 | 0.01  |
| 9296 | ATP6V1F  | 0.02  | 0.00  | -0.03 | 0.08  |
| 9308 | CD83     | 0.00  | 0.00  | 0.05  | 0.11  |
| 9311 | ACCN3    | 0.02  | 0.00  | 0.00  | 0.14  |
| 9312 | KCNB2    | 0.13  | 0.09  | 0.11  | 0.08  |
| 9313 | MMP20    | -0.07 | -0.09 | 0.00  | -0.05 |
| 9314 | KLF4     | -0.02 | 0.00  | 0.00  | 0.01  |
| 9317 | PTER     | -0.02 | 0.00  | 0.08  | 0.11  |
| 9319 | TRIP13   | 0.02  | 0.27  | 0.00  | 0.25  |

|      |          |       |       |       |       |
|------|----------|-------|-------|-------|-------|
| 9320 | TRIP12   | 0.00  | 0.00  | 0.00  | NaN   |
| 9321 | TRIP11   | -0.02 | 0.00  | 0.03  | 0.33  |
| 9322 | TRIP10   | 0.00  | -0.09 | 0.00  | 0.20  |
| 9325 | TRIP4    | 0.00  | 0.09  | -0.08 | 0.17  |
| 9328 | GTF3C5   | 0.02  | 0.00  | 0.00  | -0.05 |
| 9329 | GTF3C4   | 0.02  | 0.00  | 0.00  | 0.10  |
| 9330 | GTF3C3   | 0.00  | 0.00  | 0.00  | NaN   |
| 9331 | B4GALT6  | 0.02  | -0.09 | 0.00  | 0.11  |
| 9332 | CD163    | 0.00  | 0.09  | 0.05  | 0.06  |
| 9333 | TGM5     | -0.04 | 0.00  | -0.14 | -0.15 |
| 9334 | B4GALT5  | 0.05  | 0.00  | 0.05  | 0.26  |
| 9337 | CNOT8    | 0.00  | 0.00  | 0.00  | NaN   |
| 9338 | TCEAL1   | -0.05 | 0.00  | -0.08 | -0.09 |
| 9340 | GLP2R    | -0.07 | 0.00  | 0.00  | -0.07 |
| 9341 | VAMP3    | -0.02 | 0.00  | 0.00  | 0.06  |
| 9342 | SNAP29   | -0.02 | 0.00  | 0.03  | -0.37 |
| 9348 | NDST3    | -0.02 | 0.00  | -0.03 | -0.07 |
| 9349 | RPL23    | 0.00  | 0.45  | 0.05  | 0.34  |
| 9350 | CER1     | -0.04 | 0.00  | -0.03 | 0.02  |
| 9351 | SLC9A3R2 | 0.04  | 0.18  | 0.00  | 0.20  |
| 9353 | SLIT2    | -0.05 | -0.09 | -0.05 | 0.00  |
| 9354 | UBE4A    | -0.05 | 0.00  | 0.00  | 0.01  |
| 9355 | LHX2     | -0.02 | 0.00  | 0.00  | 0.09  |
| 9356 | SLC22A6  | 0.00  | 0.00  | 0.03  | 0.08  |
| 9358 | ITGBL1   | -0.02 | 0.00  | -0.05 | 0.08  |
| 9360 | PPIG     | 0.00  | 0.00  | 0.03  | 0.22  |
| 9362 | CPNE6    | -0.02 | 0.00  | 0.00  | 0.16  |
| 9363 | RAB33A   | -0.05 | 0.00  | -0.08 | 0.07  |
| 9364 | RAB28    | -0.04 | 0.00  | -0.05 | 0.02  |
| 9365 | KL       | -0.05 | 0.00  | -0.08 | -0.03 |
| 9368 | SLC9A3R1 | 0.05  | 0.27  | 0.03  | 0.49  |
| 9369 | NRXN3    | -0.02 | 0.00  | 0.00  | -0.19 |
| 9371 | KIF3B    | 0.00  | 0.00  | 0.00  | NaN   |
| 9373 | PLAA     | -0.11 | 0.00  | -0.05 | 0.31  |
| 9374 | PPT2     | -0.02 | 0.00  | 0.05  | 0.02  |
| 9375 | TM9SF2   | -0.02 | 0.00  | -0.05 | 0.15  |
| 9376 | SLC22A8  | 0.00  | 0.00  | 0.03  | -0.04 |
| 9377 | COX5A    | 0.00  | 0.00  | 0.00  | NaN   |
| 9378 | NRXN1    | 0.02  | 0.00  | 0.00  | -0.05 |
| 9379 | NRXN2    | 0.02  | -0.09 | 0.03  | 0.00  |
| 9380 | GRHPR    | -0.04 | 0.00  | 0.03  | 0.24  |
| 9381 | OTOF     | -0.02 | 0.00  | 0.00  | -0.04 |
| 9388 | LIPG     | -0.02 | -0.09 | -0.05 | 0.04  |
| 9391 | CIAO1    | 0.00  | 0.00  | 0.00  | NaN   |
| 9397 | NMT2     | -0.02 | 0.00  | 0.11  | 0.27  |
| 9398 | IGSF2    | 0.02  | 0.00  | -0.03 | -0.02 |
| 9399 | STOML1   | 0.00  | 0.00  | 0.00  | NaN   |



|      |          |       |       |       |       |
|------|----------|-------|-------|-------|-------|
| 9400 | RECQL5   | 0.05  | 0.27  | 0.03  | 0.30  |
| 9401 | RECQL4   | 0.15  | 0.00  | 0.30  | 0.26  |
| 9402 | GRAP2    | -0.04 | 0.00  | -0.03 | -0.01 |
| 9409 | PEX16    | -0.02 | 0.00  | -0.03 | 0.13  |
| 9412 | SURB7    | 0.00  | -0.09 | 0.05  | 0.27  |
| 9414 | TJP2     | -0.02 | 0.00  | -0.03 | 0.04  |
| 9415 | FADS2    | -0.02 | 0.00  | 0.05  | 0.03  |
| 9419 | CRIPT    | 0.00  | 0.00  | 0.00  | NaN   |
| 9420 | CYP7B1   | 0.13  | 0.00  | 0.14  | 0.17  |
| 9421 | HAND1    | 0.00  | 0.00  | 0.00  | NaN   |
| 9422 | ZNF264   | 0.00  | 0.09  | 0.00  | 0.05  |
| 9423 | NTN1     | -0.07 | 0.00  | 0.00  | -0.02 |
| 9425 | CDYL     | -0.02 | 0.00  | 0.05  | 0.16  |
| 9427 | ECEL1    | 0.02  | 0.00  | 0.00  | -0.16 |
| 9429 | ABCG2    | -0.04 | 0.00  | -0.03 | 0.18  |
| 9435 | CHST2    | 0.02  | 0.00  | 0.03  | -0.02 |
| 9439 | CRSP3    | 0.00  | 0.00  | 0.05  | 0.07  |
| 9440 | CRSP6    | -0.07 | 0.09  | -0.03 | 0.20  |
| 9442 | CRSP8    | 0.02  | 0.00  | 0.03  | 0.26  |
| 9443 | CRSP9    | 0.00  | 0.00  | 0.00  | NaN   |
| 9444 | QKI      | -0.02 | 0.00  | -0.08 | 0.25  |
| 9445 | ITM2B    | -0.07 | 0.00  | -0.14 | 0.19  |
| 9447 | AIM2     | 0.04  | 0.00  | 0.16  | 0.08  |
| 9448 | MAP4K4   | 0.02  | 0.00  | 0.00  | 0.07  |
| 9451 | EIF2AK3  | 0.00  | 0.00  | 0.00  | NaN   |
| 9452 | ITM2A    | -0.04 | 0.00  | -0.08 | 0.14  |
| 9453 | GGPS1    | 0.09  | 0.00  | 0.03  | 0.35  |
| 9459 | ARHGEF6  | -0.02 | 0.00  | -0.08 | 0.05  |
| 9462 | RASAL2   | 0.04  | 0.00  | 0.03  | 0.15  |
| 9464 | HAND2    | -0.02 | 0.00  | -0.05 | 0.06  |
| 9465 | AKAP7    | 0.00  | 0.00  | 0.08  | 0.23  |
| 9467 | SH3BP5   | -0.02 | 0.00  | 0.00  | 0.37  |
| 9468 | PCYT1B   | -0.05 | 0.00  | -0.11 | 0.04  |
| 9469 | CHST3    | -0.02 | 0.00  | -0.03 | -0.07 |
| 9472 | AKAP6    | -0.02 | 0.09  | 0.00  | -0.03 |
| 9475 | ROCK2    | -0.02 | 0.00  | 0.00  | 0.07  |
| 9477 | TRFP     | 0.00  | 0.00  | 0.08  | 0.21  |
| 9478 | CABP1    | 0.02  | 0.00  | 0.00  | 0.32  |
| 9479 | MAPK8IP1 | -0.02 | 0.00  | -0.03 | 0.09  |
| 9480 | ONECUT2  | -0.02 | 0.00  | -0.03 | 0.05  |
| 9482 | STX8     | -0.07 | 0.00  | 0.00  | 0.15  |
| 9487 | PIGL     | -0.07 | 0.00  | -0.03 | 0.15  |
| 9488 | PIGB     | -0.02 | 0.00  | -0.05 | 0.32  |
| 9489 | PGS1     | 0.02  | 0.09  | 0.03  | 0.19  |
| 9491 | PSMF1    | 0.02  | 0.00  | -0.03 | 0.14  |
| 9495 | AKAP5    | -0.02 | 0.00  | 0.00  | 0.07  |
| 9496 | TBX4     | 0.16  | 0.18  | 0.03  | -0.08 |

|      |          |       |       |       |       |
|------|----------|-------|-------|-------|-------|
| 9497 | SLC4A7   | 0.00  | 0.00  | -0.05 | 0.26  |
| 9498 | SLC4A8   | 0.02  | 0.00  | -0.03 | 0.21  |
| 9500 | MAGED1   | -0.04 | 0.00  | -0.08 | 0.00  |
| 9501 | RPH3AL   | -0.09 | 0.00  | 0.00  | -0.07 |
| 9508 | ADAMTS3  | -0.02 | 0.00  | 0.00  | -0.01 |
| 9509 | ADAMTS2  | 0.00  | 0.00  | -0.03 | 0.01  |
| 9512 | PMPCB    | 0.02  | 0.00  | 0.00  | 0.03  |
| 9513 | FXR2     | -0.05 | 0.00  | 0.00  | 0.00  |
| 9517 | SPTLC2   | -0.02 | 0.00  | -0.03 | 0.24  |
| 9519 | TBPL1    | -0.02 | 0.00  | 0.08  | 0.19  |
| 9520 | NPEPPS   | 0.00  | 0.00  | 0.00  | 0.19  |
| 9521 | EEF1E1   | -0.02 | 0.00  | 0.05  | 0.21  |
| 9522 | SCAMP1   | 0.00  | 0.09  | -0.14 | 0.32  |
| 9524 | GPSN2    | 0.02  | -0.09 | 0.00  | 0.11  |
| 9526 | MPDU1    | -0.05 | 0.00  | 0.00  | -0.06 |
| 9527 | GOSR1    | 0.02  | 0.09  | 0.00  | 0.19  |
| 9529 | BAG5     | 0.00  | 0.00  | 0.03  | 0.01  |
| 9530 | BAG4     | 0.16  | 0.09  | 0.14  | 0.41  |
| 9531 | BAG3     | -0.04 | 0.00  | -0.03 | 0.04  |
| 9532 | BAG2     | -0.04 | 0.00  | 0.08  | 0.14  |
| 9534 | ZNF254   | 0.00  | 0.00  | 0.00  | NaN   |
| 9535 | GMFG     | 0.02  | 0.00  | 0.08  | 0.14  |
| 9536 | PTGES    | 0.02  | 0.00  | 0.00  | -0.03 |
| 9541 | CIR      | 0.00  | 0.00  | 0.00  | 0.05  |
| 9542 | NRG2     | 0.00  | 0.00  | 0.00  | NaN   |
| 9545 | RAB3D    | 0.00  | 0.00  | 0.00  | NaN   |
| 9546 | APBA3    | 0.00  | 0.00  | 0.00  | NaN   |
| 9550 | ATP6V1G1 | -0.02 | 0.00  | 0.00  | 0.00  |
| 9551 | ATP5J2   | 0.02  | 0.00  | 0.00  | 0.12  |
| 9552 | SPAG7    | -0.04 | 0.00  | 0.00  | 0.24  |
| 9553 | MRPL33   | 0.00  | 0.00  | 0.00  | NaN   |
| 9555 | H2AFY    | 0.00  | 0.00  | -0.03 | 0.12  |
| 9556 | C14orf2  | 0.00  | 0.00  | 0.03  | 0.04  |
| 9557 | CHD1L    | 0.07  | 0.00  | 0.14  | 0.23  |
| 9562 | MINPP1   | -0.04 | 0.00  | -0.05 | 0.22  |
| 9563 | H6PD     | -0.02 | 0.00  | 0.00  | -0.06 |
| 9567 | GTPBP1   | -0.04 | 0.00  | -0.03 | 0.03  |
| 9570 | GOSR2    | -0.04 | 0.00  | 0.00  | 0.09  |
| 9572 | NR1D1    | 0.04  | 0.45  | 0.03  | 0.30  |
| 9573 | GDF3     | 0.00  | -0.09 | 0.05  | 0.09  |
| 9575 | CLOCK    | -0.02 | 0.00  | 0.00  | 0.09  |
| 9576 | SPAG6    | -0.02 | 0.00  | 0.05  | 0.04  |
| 9577 | BRE      | 0.00  | 0.00  | 0.00  | NaN   |
| 9578 | CDC42BPB | 0.00  | 0.00  | -0.03 | 0.31  |
| 9580 | SOX13    | 0.07  | 0.00  | 0.05  | 0.21  |
| 9585 | MPHOSPH1 | -0.04 | 0.00  | -0.11 | 0.19  |
| 9589 | WTAP     | -0.02 | 0.00  | -0.05 | 0.45  |

|      |          |       |       |       |       |
|------|----------|-------|-------|-------|-------|
| 9590 | AKAP12   | 0.00  | 0.00  | 0.00  | 0.04  |
| 9595 | PSCDBP   | -0.02 | 0.00  | 0.03  | 0.12  |
| 9603 | NFE2L3   | 0.00  | 0.18  | 0.03  | 0.06  |
| 9604 | RNF14    | 0.00  | 0.00  | 0.00  | NaN   |
| 9605 | C16orf7  | -0.04 | 0.00  | 0.00  | 0.08  |
| 9609 | RAB36    | -0.02 | 0.00  | 0.03  | 0.19  |
| 9610 | RIN1     | 0.07  | 0.00  | 0.03  | 0.00  |
| 9611 | NCOR1    | -0.07 | 0.00  | -0.03 | 0.14  |
| 9612 | NCOR2    | 0.02  | 0.09  | 0.03  | 0.14  |
| 9616 | RNF7     | 0.02  | 0.00  | 0.03  | 0.32  |
| 9617 | MTRF1    | -0.05 | 0.00  | -0.05 | 0.16  |
| 9618 | TRAF4    | 0.02  | 0.09  | 0.00  | 0.24  |
| 9619 | ABCG1    | 0.00  | 0.00  | 0.00  | 0.17  |
| 9620 | CELSR1   | -0.02 | 0.00  | -0.03 | 0.07  |
| 9623 | TCL1B    | -0.04 | 0.00  | -0.03 | 0.00  |
| 9627 | SNCAIP   | 0.00  | 0.00  | -0.03 | 0.01  |
| 9628 | RGS6     | -0.02 | 0.00  | 0.00  | 0.14  |
| 9629 | CLCA3    | -0.02 | 0.00  | -0.03 | -0.05 |
| 9630 | GNA14    | -0.02 | 0.00  | 0.00  | -0.01 |
| 9631 | NUP155   | 0.04  | 0.27  | 0.00  | 0.40  |
| 9632 | SEC24C   | 0.04  | 0.09  | 0.00  | 0.35  |
| 9633 | MTL5     | 0.09  | 0.09  | 0.03  | 0.40  |
| 9635 | CLCA2    | -0.02 | 0.00  | -0.03 | 0.12  |
| 9637 | FEZ2     | 0.00  | 0.00  | 0.00  | NaN   |
| 9638 | FEZ1     | -0.05 | 0.00  | -0.03 | 0.23  |
| 9639 | ARHGEF10 | -0.18 | -0.18 | -0.16 | 0.13  |
| 9652 | KIAA0372 | 0.00  | 0.00  | -0.14 | 0.15  |
| 9653 | HS2ST1   | -0.02 | 0.00  | -0.03 | 0.12  |
| 9655 | SOCS5    | 0.00  | 0.00  | 0.00  | NaN   |
| 9659 | PDE4DIP  | 0.04  | 0.00  | 0.00  | 0.20  |
| 9663 | LPIN2    | 0.00  | -0.09 | 0.00  | 0.02  |
| 9672 | SDC3     | -0.02 | 0.09  | 0.00  | 0.23  |
| 9674 | KIAA0040 | 0.02  | 0.00  | 0.03  | 0.14  |
| 9675 | KIAA0406 | 0.02  | 0.00  | 0.03  | 0.22  |
| 9683 | N4BP1    | -0.09 | 0.09  | -0.03 | 0.09  |
| 9692 | KIAA0391 | 0.02  | 0.09  | 0.00  | 0.44  |
| 9698 | PUM1     | 0.00  | 0.09  | 0.00  | 0.22  |
| 9700 | ESPL1    | 0.02  | 0.00  | -0.03 | 0.23  |
| 9703 | KIAA0100 | 0.04  | 0.09  | 0.00  | 0.44  |
| 9706 | ULK2     | -0.04 | 0.09  | 0.03  | 0.28  |
| 9709 | HERPUD1  | -0.05 | 0.00  | 0.00  | 0.06  |
| 9710 | KIAA0355 | 0.00  | 0.00  | 0.05  | 0.35  |
| 9715 | KIAA0773 | 0.02  | 0.00  | 0.00  | 0.14  |
| 9718 | ECE2     | 0.05  | 0.00  | 0.05  | -0.01 |
| 9723 | SEMA3E   | 0.02  | 0.00  | 0.00  | 0.08  |
| 9729 | KIAA0408 | -0.02 | 0.00  | 0.00  | 0.02  |
| 9731 | KIAA0562 | -0.02 | 0.00  | 0.00  | 0.12  |

|      |           |       |       |       |       |
|------|-----------|-------|-------|-------|-------|
| 9733 | SART3     | 0.00  | 0.00  | 0.00  | NaN   |
| 9735 | KNTC1     | 0.02  | 0.00  | 0.00  | 0.17  |
| 9741 | LAPTM4A   | -0.02 | 0.00  | 0.00  | 0.02  |
| 9744 | CENTB1    | -0.05 | 0.00  | 0.00  | 0.07  |
| 9746 | CLSTN3    | 0.00  | 0.09  | 0.05  | 0.09  |
| 9747 | KIAA0738  | 0.02  | 0.00  | 0.00  | 0.11  |
| 9748 | SLK       | -0.02 | 0.00  | 0.00  | 0.15  |
| 9750 | C6orf32   | 0.00  | 0.00  | 0.03  | -0.07 |
| 9751 | SNPH      | 0.02  | 0.00  | -0.03 | 0.07  |
| 9757 | MLL4      | 0.00  | 0.09  | 0.03  | 0.15  |
| 9759 | HDAC4     | 0.00  | 0.00  | 0.00  | NaN   |
| 9760 | TOX       | 0.15  | 0.00  | 0.14  | -0.01 |
| 9761 | KIAA0152  | 0.00  | 0.00  | 0.00  | NaN   |
| 9764 | KIAA0513  | -0.09 | 0.00  | 0.00  | 0.11  |
| 9766 | KIAA0247  | -0.02 | 0.00  | 0.00  | 0.08  |
| 9768 | KIAA0101  | 0.00  | 0.09  | -0.08 | 0.07  |
| 9770 | RASSF2    | 0.02  | 0.00  | -0.03 | -0.12 |
| 9772 | KIAA0195  | 0.05  | 0.27  | 0.03  | 0.18  |
| 9776 | KIAA0652  | -0.02 | 0.00  | -0.03 | 0.04  |
| 9778 | KIAA0232  | -0.02 | 0.00  | 0.00  | 0.09  |
| 9782 | MATR3     | 0.00  | 0.00  | 0.00  | NaN   |
| 9784 | SNX17     | 0.00  | 0.00  | 0.00  | NaN   |
| 9786 | KIAA0586  | 0.02  | 0.00  | -0.03 | 0.15  |
| 9791 | PTDSS1    | 0.18  | 0.18  | 0.27  | 0.32  |
| 9794 | MAML1     | 0.02  | 0.00  | -0.03 | 0.14  |
| 9796 | PHYHIP    | -0.13 | -0.18 | -0.22 | -0.03 |
| 9798 | KIAA0174  | -0.07 | 0.00  | 0.03  | 0.13  |
| 9801 | MRPL19    | 0.00  | 0.00  | 0.00  | NaN   |
| 9802 | DAZAP2    | 0.02  | 0.00  | -0.03 | 0.15  |
| 9807 | IHPK1     | 0.00  | 0.00  | 0.00  | NaN   |
| 9810 | RNF40     | 0.07  | 0.09  | 0.00  | 0.27  |
| 9811 | KIAA0427  | -0.02 | -0.09 | -0.03 | 0.21  |
| 9812 | KIAA0141  | 0.00  | 0.00  | 0.00  | NaN   |
| 9813 | KIAA0494  | 0.00  | 0.00  | 0.00  | -0.02 |
| 9815 | GIT2      | 0.00  | 0.00  | 0.00  | NaN   |
| 9816 | KIAA0133  | 0.07  | 0.00  | 0.03  | 0.10  |
| 9817 | KEAP1     | 0.02  | 0.00  | 0.00  | 0.20  |
| 9821 | RB1CC1    | 0.13  | 0.00  | 0.14  | 0.34  |
| 9824 | ARHGAP11A | 0.02  | 0.00  | -0.16 | -0.10 |
| 9825 | SPATA2    | 0.05  | 0.00  | 0.05  | 0.31  |
| 9826 | ARHGEF11  | 0.04  | 0.00  | 0.11  | 0.23  |
| 9829 | DNAJC6    | -0.02 | 0.00  | 0.00  | 0.14  |
| 9830 | TRIM14    | -0.02 | 0.00  | 0.00  | -0.03 |
| 9833 | MELK      | -0.02 | 0.00  | 0.03  | 0.00  |
| 9839 | ZFHX1B    | -0.02 | 0.00  | 0.00  | -0.02 |
| 9843 | HEPH      | -0.04 | 0.00  | -0.05 | -0.09 |
| 9844 | ELMO1     | -0.02 | 0.00  | -0.03 | 0.09  |

|      |          |       |       |       |       |
|------|----------|-------|-------|-------|-------|
| 9846 | GAB2     | 0.11  | 0.09  | 0.03  | 0.30  |
| 9847 | KIAA0528 | 0.00  | -0.09 | 0.05  | 0.17  |
| 9851 | KIAA0753 | -0.05 | 0.00  | 0.00  | 0.04  |
| 9856 | KIAA0319 | 0.00  | 0.00  | 0.03  | 0.10  |
| 9858 | KIAA0649 | 0.02  | 0.00  | 0.03  | 0.10  |
| 9865 | KIAA0644 | -0.02 | 0.18  | 0.00  | 0.30  |
| 9868 | TOMM70A  | 0.00  | 0.00  | 0.00  | 0.22  |
| 9869 | SETDB1   | 0.07  | 0.09  | 0.16  | 0.27  |
| 9870 | KIAA0317 | -0.02 | 0.00  | 0.00  | 0.09  |
| 9871 | SEC24D   | -0.02 | 0.00  | -0.03 | 0.25  |
| 9874 | TLK1     | 0.00  | 0.00  | 0.03  | 0.16  |
| 9878 | KIAA0737 | -0.02 | 0.00  | 0.00  | 0.07  |
| 9885 | OSBPL2   | 0.05  | 0.09  | 0.14  | 0.19  |
| 9892 | SNAP91   | -0.02 | 0.00  | -0.05 | -0.23 |
| 9895 | KIAA0329 | 0.00  | 0.00  | -0.03 | 0.19  |
| 9897 | KIAA0196 | 0.20  | 0.09  | 0.38  | 0.29  |
| 9899 | SV2B     | 0.02  | 0.00  | 0.03  | -0.08 |
| 9901 | SRGAP3   | 0.00  | 0.00  | 0.00  | 0.05  |
| 9908 | G3BP2    | -0.02 | 0.00  | 0.00  | 0.22  |
| 9912 | KIAA0672 | -0.07 | 0.00  | -0.03 | 0.08  |
| 9915 | ARNT2    | 0.00  | 0.00  | -0.03 | 0.21  |
| 9921 | RNF10    | 0.02  | 0.00  | 0.00  | 0.22  |
| 9927 | MFN2     | -0.02 | 0.00  | 0.00  | 0.15  |
| 9931 | HELZ     | 0.13  | 0.27  | 0.03  | 0.35  |
| 9933 | KIAA0020 | -0.05 | 0.00  | -0.08 | 0.34  |
| 9935 | MAFB     | 0.04  | 0.00  | 0.00  | 0.11  |
| 9937 | DCLRE1A  | -0.04 | 0.00  | 0.00  | 0.11  |
| 9939 | RBM8A    | 0.05  | 0.00  | 0.08  | 0.26  |
| 9940 | DLEC1    | 0.00  | 0.00  | 0.00  | 0.08  |
| 9941 | ENDOGL1  | -0.04 | 0.00  | 0.00  | -0.08 |
| 9942 | XYLB     | -0.04 | 0.00  | 0.00  | 0.14  |
| 9943 | OSR1     | -0.02 | 0.00  | 0.00  | -0.06 |
| 9945 | GFPT2    | 0.00  | 0.00  | -0.03 | -0.03 |
| 9946 | CRYZL1   | 0.00  | 0.00  | 0.00  | 0.03  |
| 9947 | MAGEC1   | -0.05 | 0.00  | -0.08 | -0.14 |
| 9948 | WDR1     | -0.04 | 0.00  | -0.05 | 0.24  |
| 9950 | GOLGA5   | -0.02 | 0.00  | 0.03  | 0.41  |
| 9953 | HS3ST3B1 | -0.05 | 0.00  | -0.03 | 0.04  |
| 9955 | HS3ST3A1 | -0.05 | 0.00  | -0.03 | 0.11  |
| 9956 | HS3ST2   | 0.02  | -0.09 | 0.00  | -0.01 |
| 9957 | HS3ST1   | -0.04 | 0.00  | -0.05 | 0.15  |
| 9958 | USP15    | 0.00  | 0.00  | 0.00  | NaN   |
| 9962 | SLC23A1  | 0.00  | 0.00  | -0.03 | -0.04 |
| 9966 | TNFSF15  | -0.02 | 0.00  | 0.00  | -0.08 |
| 9970 | NR1I3    | 0.11  | 0.00  | 0.14  | 0.06  |
| 9971 | NR1H4    | 0.00  | 0.00  | 0.03  | 0.06  |
| 9972 | NUP153   | 0.00  | 0.00  | 0.08  | 0.19  |

|       |          |       |       |       |       |
|-------|----------|-------|-------|-------|-------|
| 9973  | CCS      | 0.07  | 0.00  | 0.03  | 0.22  |
| 9978  | RBX1     | -0.02 | 0.00  | -0.03 | 0.16  |
| 9986  | RCE1     | 0.07  | 0.09  | 0.03  | 0.24  |
| 9987  | HNRPDL   | -0.04 | 0.00  | -0.03 | 0.12  |
| 9988  | DMTF1    | 0.02  | 0.00  | 0.00  | 0.16  |
| 9989  | PPP4R1   | -0.02 | -0.09 | 0.00  | 0.07  |
| 9990  | SLC12A6  | -0.02 | 0.00  | -0.16 | -0.02 |
| 9991  | ROD1     | -0.02 | 0.00  | 0.00  | 0.25  |
| 9992  | KCNE2    | 0.00  | 0.00  | 0.00  | 0.09  |
| 9993  | DGCR2    | -0.02 | 0.00  | 0.03  | 0.03  |
| 9994  | CASP8AP2 | -0.04 | 0.00  | 0.00  | 0.29  |
| 10000 | AKT3     | 0.09  | 0.00  | 0.05  | 0.12  |
| 10001 | MED6     | -0.02 | 0.00  | 0.00  | 0.11  |
| 10002 | NR2E3    | 0.00  | 0.00  | -0.05 | 0.12  |
| 10003 | NAALAD2  | -0.11 | 0.00  | 0.03  | -0.07 |
| 10010 | TANK     | 0.00  | 0.00  | 0.03  | 0.29  |
| 10013 | HDAC6    | -0.04 | 0.00  | -0.05 | -0.09 |
| 10014 | HDAC5    | -0.02 | 0.00  | 0.00  | 0.16  |
| 10015 | PDCD6IP  | 0.02  | 0.00  | -0.03 | 0.39  |
| 10016 | PDCD6    | 0.02  | 0.18  | 0.00  | 0.40  |
| 10017 | BCL2L10  | -0.02 | 0.00  | -0.05 | 0.09  |
| 10018 | BCL2L11  | 0.00  | 0.00  | 0.00  | NaN   |
| 10020 | GENE     | 0.00  | 0.00  | 0.00  | 0.16  |
| 10021 | HCN4     | 0.00  | 0.00  | 0.00  | NaN   |
| 10022 | INSL5    | -0.02 | 0.00  | 0.00  | -0.01 |
| 10023 | FRAT1    | -0.02 | 0.00  | -0.03 | 0.04  |
| 10024 | TROAP    | 0.00  | 0.00  | -0.03 | 0.00  |
| 10026 | PIGK     | -0.02 | 0.00  | -0.03 | 0.08  |
| 10036 | CHAF1A   | 0.00  | 0.00  | 0.00  | NaN   |
| 10040 | TOM1L1   | 0.07  | 0.27  | 0.03  | 0.49  |
| 10042 | HMG2L1   | -0.02 | 0.00  | 0.03  | 0.07  |
| 10043 | TOM1     | -0.02 | 0.00  | 0.03  | -0.09 |
| 10045 | SH2D3A   | 0.00  | -0.09 | 0.00  | 0.02  |
| 10046 | CXorf6   | -0.04 | 0.00  | -0.08 | -0.10 |
| 10047 | CST8     | 0.02  | 0.00  | -0.03 | 0.04  |
| 10048 | RANBP9   | 0.00  | 0.00  | 0.08  | 0.16  |
| 10049 | DNAJB6   | 0.02  | 0.00  | -0.03 | 0.05  |
| 10050 | SLC17A4  | 0.00  | 0.00  | 0.03  | -0.04 |
| 10052 | GJA7     | -0.05 | 0.00  | 0.00  | 0.08  |
| 10053 | AP1M2    | 0.02  | 0.00  | 0.00  | 0.17  |
| 10057 | ABCC5    | 0.04  | 0.00  | 0.00  | 0.04  |
| 10058 | ABCB6    | 0.00  | 0.00  | 0.00  | NaN   |
| 10059 | DNM1L    | 0.00  | 0.00  | 0.05  | 0.12  |
| 10060 | ABCC9    | 0.00  | -0.09 | 0.05  | 0.02  |
| 10061 | ABCF2    | 0.02  | 0.00  | -0.03 | 0.17  |
| 10062 | NR1H3    | -0.02 | 0.00  | -0.03 | 0.01  |
| 10063 | COX17    | 0.00  | 0.00  | -0.03 | 0.44  |

|       |          |       |       |       |       |
|-------|----------|-------|-------|-------|-------|
| 10066 | SCAMP2   | 0.00  | 0.00  | 0.00  | NaN   |
| 10067 | SCAMP3   | 0.09  | 0.00  | 0.14  | 0.28  |
| 10069 | C21orf6  | -0.02 | 0.00  | 0.05  | 0.17  |
| 10072 | DPP3     | 0.05  | 0.00  | 0.03  | 0.26  |
| 10076 | PTPRU    | -0.02 | 0.09  | 0.00  | 0.03  |
| 10078 | TSSC4    | 0.00  | 0.00  | 0.00  | NaN   |
| 10079 | ATP9A    | 0.09  | 0.00  | 0.05  | 0.39  |
| 10084 | PQBP1    | -0.04 | 0.00  | -0.05 | 0.21  |
| 10087 | COL4A3BP | 0.00  | 0.09  | -0.14 | 0.26  |
| 10089 | KCNK7    | 0.02  | 0.00  | 0.05  | 0.01  |
| 10090 | UST      | 0.00  | 0.00  | 0.00  | 0.25  |
| 10092 | ARPC5    | 0.07  | 0.00  | 0.03  | 0.14  |
| 10093 | ARPC4    | -0.02 | 0.00  | 0.00  | 0.12  |
| 10094 | ARPC3    | 0.00  | 0.00  | 0.00  | NaN   |
| 10095 | ARPC1B   | 0.02  | 0.00  | 0.00  | 0.13  |
| 10096 | ACTR3    | 0.00  | 0.00  | 0.00  | NaN   |
| 10097 | ACTR2    | 0.00  | 0.00  | 0.00  | NaN   |
| 10101 | NUBP2    | 0.04  | 0.18  | 0.00  | 0.22  |
| 10102 | TSFM     | 0.02  | 0.09  | 0.00  | 0.18  |
| 10105 | PPIF     | 0.00  | 0.00  | 0.05  | 0.33  |
| 10109 | ARPC2    | 0.02  | 0.00  | 0.00  | 0.28  |
| 10110 | SGK2     | 0.02  | 0.09  | 0.03  | 0.08  |
| 10111 | RAD50    | 0.00  | 0.00  | -0.03 | 0.01  |
| 10113 | PREB     | 0.00  | 0.00  | 0.00  | NaN   |
| 10114 | HIPK3    | 0.04  | 0.00  | -0.05 | 0.11  |
| 10116 | FEM1B    | 0.00  | 0.00  | -0.05 | 0.16  |
| 10120 | ACTR1B   | 0.00  | 0.00  | 0.00  | NaN   |
| 10121 | ACTR1A   | 0.00  | 0.00  | -0.03 | 0.25  |
| 10125 | RASGRP1  | -0.02 | 0.00  | -0.19 | 0.12  |
| 10126 | DNAL4    | -0.04 | 0.00  | -0.03 | 0.31  |
| 10127 | ZNF263   | 0.04  | 0.00  | 0.00  | 0.31  |
| 10128 | LRPPRC   | 0.00  | 0.00  | 0.00  | NaN   |
| 10131 | TRAP1    | 0.04  | 0.00  | 0.00  | -0.03 |
| 10133 | OPTN     | 0.02  | 0.00  | 0.14  | 0.30  |
| 10136 | ELA3A    | 0.00  | 0.00  | 0.00  | NaN   |
| 10138 | YAF2     | 0.00  | 0.09  | 0.03  | 0.14  |
| 10140 | TOB1     | 0.13  | 0.09  | 0.03  | 0.45  |
| 10141 | C4orf6   | -0.02 | 0.00  | 0.00  | -0.14 |
| 10142 | AKAP9    | 0.02  | 0.00  | 0.05  | 0.33  |
| 10148 | EBI3     | 0.00  | 0.00  | 0.00  | NaN   |
| 10149 | GPR64    | -0.05 | -0.09 | -0.11 | -0.02 |
| 10151 | HNRPA3   | 0.02  | 0.00  | 0.00  | 0.21  |
| 10154 | PLXNC1   | 0.00  | 0.09  | 0.00  | 0.07  |
| 10155 | TRIM28   | 0.00  | 0.18  | -0.03 | 0.40  |
| 10157 | AASS     | 0.00  | 0.00  | -0.03 | -0.10 |
| 10160 | FARP1    | -0.02 | 0.09  | -0.05 | 0.22  |
| 10164 | CHST4    | -0.07 | 0.00  | 0.03  | 0.03  |

|       |           |       |       |       |       |
|-------|-----------|-------|-------|-------|-------|
| 10165 | SLC25A13  | 0.02  | 0.00  | -0.03 | 0.21  |
| 10166 | SLC25A15  | -0.02 | 0.00  | -0.03 | 0.11  |
| 10168 | ZNF197    | -0.04 | 0.00  | 0.00  | 0.03  |
| 10179 | RBM7      | -0.09 | 0.00  | 0.00  | 0.15  |
| 10180 | RBM6      | -0.02 | 0.00  | 0.00  | 0.33  |
| 10181 | RBM5      | -0.02 | 0.00  | 0.03  | 0.29  |
| 10184 | LHFPL2    | 0.00  | 0.09  | -0.14 | 0.04  |
| 10186 | LHFP      | -0.05 | 0.00  | -0.08 | 0.22  |
| 10196 | PRMT3     | 0.00  | 0.00  | -0.05 | -0.03 |
| 10197 | PSME3     | -0.04 | 0.00  | 0.00  | 0.16  |
| 10198 | MPHOSPH9  | 0.02  | 0.00  | 0.00  | 0.16  |
| 10199 | MPHOSPH10 | 0.02  | 0.00  | 0.00  | 0.10  |
| 10200 | MPHOSPH6  | -0.09 | 0.00  | 0.00  | 0.27  |
| 10202 | DHRS2     | -0.02 | 0.00  | 0.00  | 0.10  |
| 10203 | CALCRL    | 0.02  | 0.00  | 0.00  | 0.20  |
| 10205 | EVA1      | -0.05 | 0.00  | 0.00  | 0.08  |
| 10207 | INADL     | 0.00  | 0.00  | 0.00  | 0.16  |
| 10211 | FLOT1     | 0.02  | 0.00  | 0.05  | -0.03 |
| 10212 | DDX39     | 0.02  | -0.09 | 0.00  | 0.36  |
| 10215 | OLIG2     | 0.00  | 0.00  | -0.03 | 0.05  |
| 10216 | PRG4      | 0.04  | 0.09  | 0.03  | 0.04  |
| 10219 | KLRG1     | 0.00  | -0.18 | 0.05  | 0.08  |
| 10220 | GDF11     | 0.02  | 0.00  | 0.00  | 0.22  |
| 10223 | GPA33     | 0.00  | 0.00  | 0.05  | -0.06 |
| 10227 | TETRA     | -0.02 | 0.00  | 0.00  | 0.14  |
| 10228 | STX6      | 0.04  | 0.00  | 0.03  | 0.12  |
| 10229 | COQ7      | 0.02  | 0.09  | 0.00  | 0.23  |
| 10231 | DSCR1L1   | 0.00  | 0.00  | 0.05  | 0.08  |
| 10232 | MSLN      | 0.07  | 0.18  | 0.05  | -0.03 |
| 10235 | RASGRP2   | 0.00  | -0.09 | 0.03  | 0.11  |
| 10236 | HNRPR     | 0.02  | 0.00  | 0.00  | 0.15  |
| 10239 | AP3S2     | 0.02  | 0.00  | -0.03 | 0.27  |
| 10240 | MRPS31    | -0.02 | 0.00  | -0.05 | 0.30  |
| 10242 | KCNMB2    | 0.04  | 0.00  | 0.03  | 0.01  |
| 10243 | GPHN      | -0.02 | 0.00  | 0.00  | -0.04 |
| 10245 | TIMM17B   | -0.04 | 0.00  | -0.05 | 0.05  |
| 10246 | SLC17A2   | 0.00  | 0.00  | 0.03  | 0.14  |
| 10249 | GLYAT     | -0.04 | 0.00  | 0.00  | 0.02  |
| 10250 | SRRM1     | 0.00  | 0.00  | 0.00  | NaN   |
| 10253 | SPRY2     | -0.04 | -0.09 | -0.14 | 0.06  |
| 10254 | STAM2     | -0.02 | 0.00  | 0.03  | 0.12  |
| 10257 | ABCC4     | -0.02 | 0.00  | -0.05 | 0.07  |
| 10262 | SF3B4     | 0.07  | 0.00  | 0.14  | 0.48  |
| 10265 | IRX5      | -0.07 | 0.00  | 0.00  | -0.02 |
| 10266 | RAMP2     | -0.04 | 0.00  | 0.00  | 0.07  |
| 10267 | RAMP1     | 0.04  | 0.00  | 0.00  | 0.05  |
| 10268 | RAMP3     | -0.04 | 0.00  | 0.05  | -0.07 |



|       |          |       |       |       |       |
|-------|----------|-------|-------|-------|-------|
| 10269 | ZMPSTE24 | -0.02 | 0.00  | 0.00  | -0.08 |
| 10270 | AKAP8    | 0.02  | 0.00  | 0.00  | 0.08  |
| 10272 | FSTL3    | 0.00  | 0.00  | -0.03 | 0.06  |
| 10273 | STUB1    | 0.04  | 0.18  | 0.05  | 0.23  |
| 10274 | STAG1    | 0.00  | 0.00  | -0.03 | 0.14  |
| 10276 | NET1     | 0.00  | 0.00  | 0.11  | 0.12  |
| 10277 | UBE4B    | -0.02 | 0.00  | 0.00  | 0.21  |
| 10279 | PRSS16   | 0.00  | -0.09 | 0.05  | 0.10  |
| 10281 | DSCR4    | 0.00  | 0.00  | 0.00  | 0.05  |
| 10282 | BET1     | 0.02  | 0.00  | 0.00  | 0.39  |
| 10284 | SAP18    | -0.07 | 0.00  | -0.11 | 0.27  |
| 10286 | BCAS2    | 0.00  | 0.00  | -0.03 | -0.01 |
| 10287 | RGS19    | 0.07  | 0.09  | 0.08  | 0.33  |
| 10288 | LILRB2   | 0.00  | 0.09  | -0.03 | -0.04 |
| 10291 | SF3A1    | 0.00  | 0.00  | 0.05  | 0.28  |
| 10294 | DNAJA2   | -0.11 | 0.09  | 0.03  | 0.18  |
| 10295 | BCKDK    | 0.04  | 0.09  | 0.00  | 0.27  |
| 10296 | MAEA     | -0.02 | 0.00  | 0.00  | 0.12  |
| 10298 | PAK4     | 0.02  | 0.09  | 0.05  | 0.25  |
| 10300 | KATNB1   | -0.05 | 0.00  | 0.03  | 0.40  |
| 10302 | SNAPC5   | 0.00  | 0.09  | -0.05 | 0.10  |
| 10308 | ZNF267   | 0.02  | 0.09  | 0.00  | 0.09  |
| 10309 | UNG2     | 0.00  | 0.00  | -0.11 | 0.11  |
| 10311 | DSCR3    | 0.00  | 0.00  | 0.00  | 0.12  |
| 10312 | TCIRG1   | 0.07  | 0.09  | 0.03  | 0.24  |
| 10313 | RTN3     | 0.02  | 0.00  | 0.03  | 0.23  |
| 10314 | LANCL1   | 0.00  | 0.00  | 0.00  | NaN   |
| 10317 | B3GALT5  | 0.00  | 0.00  | -0.03 | 0.01  |
| 10319 | LAMC3    | 0.02  | 0.00  | 0.03  | 0.04  |
| 10326 | SIRPB1   | 0.02  | 0.00  | -0.03 | -0.08 |
| 10327 | AKR1A1   | 0.00  | 0.00  | 0.00  | NaN   |
| 10329 | TMEM5    | 0.00  | 0.00  | 0.00  | NaN   |
| 10330 | TMEM4    | 0.00  | 0.00  | 0.00  | NaN   |
| 10331 | B3GNT3   | 0.02  | 0.00  | 0.00  | -0.14 |
| 10333 | TLR6     | -0.05 | 0.00  | -0.03 | 0.07  |
| 10342 | TFG      | 0.00  | 0.00  | 0.00  | 0.33  |
| 10343 | PKDREJ   | -0.02 | 0.00  | -0.03 | -0.10 |
| 10346 | TRIM22   | -0.02 | 0.00  | -0.03 | 0.06  |
| 10347 | ABCA7    | 0.00  | 0.00  | -0.03 | 0.06  |
| 10351 | ABCA8    | 0.07  | 0.18  | 0.03  | -0.06 |
| 10352 | WARS2    | 0.00  | 0.00  | 0.00  | 0.16  |
| 10360 | NPM3     | 0.00  | 0.00  | -0.03 | 0.16  |
| 10362 | HMG20B   | 0.00  | 0.00  | 0.00  | NaN   |
| 10363 | HMG20A   | 0.00  | 0.00  | -0.08 | 0.01  |
| 10365 | KLF2     | 0.00  | 0.00  | 0.00  | NaN   |
| 10367 | CBARA1   | -0.02 | 0.00  | 0.00  | 0.20  |
| 10368 | CACNG3   | 0.02  | 0.00  | 0.00  | 0.05  |

|       |           |       |       |       |       |
|-------|-----------|-------|-------|-------|-------|
| 10369 | CACNG2    | -0.04 | 0.00  | 0.03  | -0.05 |
| 10370 | CITED2    | 0.00  | 0.00  | 0.03  | 0.03  |
| 10371 | SEMA3A    | 0.02  | 0.00  | 0.00  | 0.09  |
| 10376 | K-ALPHA-1 | 0.00  | 0.00  | -0.03 | 0.02  |
| 10379 | ISGF3G    | -0.02 | 0.00  | 0.00  | -0.01 |
| 10380 | BPNT1     | 0.07  | 0.00  | 0.00  | -0.02 |
| 10381 | TUBB4     | 0.00  | -0.09 | 0.00  | -0.05 |
| 10384 | BTN3A3    | 0.00  | 0.00  | 0.03  | 0.24  |
| 10385 | BTN2A2    | 0.00  | 0.00  | 0.03  | 0.11  |
| 10388 | SYCP2     | 0.05  | 0.09  | 0.00  | 0.11  |
| 10389 | SCML2     | -0.05 | -0.09 | -0.11 | -0.06 |
| 10390 | CEPT1     | 0.00  | 0.00  | -0.05 | 0.09  |
| 10391 | CORO2B    | 0.00  | 0.00  | -0.05 | 0.06  |
| 10394 | PRG3      | 0.00  | 0.00  | 0.05  | -0.11 |
| 10395 | DLC1      | -0.16 | -0.18 | -0.22 | 0.13  |
| 10396 | ATP8A1    | -0.04 | 0.00  | -0.11 | -0.02 |
| 10397 | NDRG1     | 0.20  | 0.27  | 0.32  | 0.24  |
| 10398 | MYL9      | 0.02  | 0.00  | 0.00  | 0.08  |
| 10399 | GNB2L1    | 0.00  | 0.00  | -0.03 | 0.12  |
| 10400 | PEMT      | -0.07 | 0.00  | 0.00  | 0.00  |
| 10401 | PIAS3     | 0.05  | 0.00  | 0.11  | 0.08  |
| 10404 | PGCP      | 0.16  | 0.18  | 0.24  | 0.12  |
| 10406 | WFDC2     | 0.04  | 0.00  | 0.03  | 0.08  |
| 10409 | BASP1     | 0.04  | 0.18  | 0.00  | -0.07 |
| 10413 | YAP1      | -0.05 | -0.09 | 0.00  | 0.07  |
| 10417 | SPON2     | 0.02  | 0.00  | 0.00  | 0.07  |
| 10418 | SPON1     | -0.02 | 0.00  | -0.05 | 0.11  |
| 10420 | TESK2     | 0.00  | 0.00  | 0.00  | NaN   |
| 10421 | CD2BP2    | 0.05  | 0.00  | 0.00  | 0.24  |
| 10424 | PGRMC2    | 0.00  | 0.00  | -0.03 | 0.05  |
| 10425 | ARIH2     | -0.04 | 0.00  | 0.00  | 0.25  |
| 10427 | SEC24B    | -0.02 | 0.00  | 0.00  | 0.05  |
| 10428 | CFDP1     | -0.09 | 0.00  | 0.03  | 0.21  |
| 10431 | TIMM23    | -0.02 | 0.00  | 0.00  | 0.16  |
| 10432 | RBM14     | 0.07  | 0.00  | 0.03  | 0.07  |
| 10434 | LYPLA1    | 0.11  | 0.00  | 0.14  | 0.01  |
| 10437 | IFI30     | 0.02  | 0.00  | 0.00  | -0.09 |
| 10438 | C1D       | 0.02  | 0.00  | 0.00  | 0.04  |
| 10439 | OLFM1     | 0.02  | 0.00  | 0.03  | 0.03  |
| 10440 | TIMM17A   | 0.11  | 0.00  | 0.05  | 0.24  |
| 10445 | MCRS1     | 0.00  | 0.00  | -0.03 | 0.15  |
| 10449 | ACAA2     | -0.02 | -0.09 | -0.05 | 0.03  |
| 10450 | PPIE      | -0.02 | 0.09  | 0.00  | 0.24  |
| 10451 | VAV3      | -0.02 | 0.00  | -0.03 | 0.06  |
| 10452 | TOMM40    | -0.02 | 0.00  | -0.03 | -0.09 |
| 10454 | MAP3K7IP1 | -0.04 | 0.00  | 0.00  | 0.15  |
| 10455 | PECI      | -0.02 | 0.00  | 0.05  | 0.06  |

|       |          |       |       |       |       |
|-------|----------|-------|-------|-------|-------|
| 10456 | HAX1     | 0.05  | 0.00  | 0.14  | 0.35  |
| 10457 | GPNMB    | -0.02 | 0.09  | 0.03  | 0.15  |
| 10458 | BAIAP2   | 0.07  | 0.18  | 0.19  | 0.08  |
| 10460 | TACC3    | -0.02 | 0.00  | 0.00  | 0.12  |
| 10461 | MERTK    | 0.00  | 0.00  | 0.00  | NaN   |
| 10465 | PPIH     | 0.02  | 0.00  | 0.00  | 0.14  |
| 10466 | COG5     | 0.02  | 0.00  | -0.03 | 0.19  |
| 10468 | FST      | 0.00  | 0.00  | -0.08 | 0.04  |
| 10469 | TIMM44   | 0.00  | -0.09 | 0.00  | 0.15  |
| 10472 | ZNF238   | 0.09  | 0.00  | 0.05  | 0.13  |
| 10474 | TADA3L   | -0.02 | 0.00  | 0.00  | 0.03  |
| 10477 | UBE2E3   | 0.00  | 0.00  | 0.00  | NaN   |
| 10478 | SLC25A17 | -0.02 | 0.00  | -0.03 | 0.01  |
| 10479 | SLC9A6   | -0.04 | 0.00  | -0.08 | 0.02  |
| 10481 | HOXB13   | 0.05  | 0.18  | 0.00  | 0.05  |
| 10482 | NXF1     | 0.00  | 0.00  | 0.03  | 0.10  |
| 10483 | SEC23B   | 0.00  | 0.00  | -0.08 | 0.34  |
| 10484 | SEC23A   | 0.00  | 0.00  | -0.03 | 0.31  |
| 10486 | CAP2     | 0.00  | 0.00  | 0.05  | 0.00  |
| 10488 | CREB3    | 0.00  | 0.00  | 0.00  | -0.17 |
| 10491 | CRTAP    | 0.02  | 0.00  | -0.03 | 0.23  |
| 10494 | STK25    | 0.00  | 0.00  | 0.00  | NaN   |
| 10495 | COVA1    | -0.05 | 0.00  | -0.08 | 0.10  |
| 10498 | CARM1    | 0.02  | 0.00  | 0.00  | 0.25  |
| 10499 | NCOA2    | 0.15  | 0.00  | 0.14  | 0.34  |
| 10500 | SEMA6C   | 0.07  | 0.09  | 0.19  | 0.08  |
| 10501 | SEMA6B   | 0.00  | 0.00  | 0.00  | NaN   |
| 10505 | SEMA4F   | 0.00  | 0.00  | 0.00  | NaN   |
| 10507 | SEMA4D   | -0.02 | 0.00  | 0.00  | 0.02  |
| 10512 | SEMA3C   | 0.02  | 0.00  | 0.03  | 0.21  |
| 10513 | APPBP2   | 0.20  | 0.18  | 0.03  | 0.64  |
| 10514 | MYBBP1A  | 0.04  | 0.00  | 0.03  | 0.03  |
| 10516 | FBLN5    | -0.02 | 0.00  | 0.03  | 0.20  |
| 10519 | CIB1     | 0.02  | 0.00  | -0.03 | 0.40  |
| 10520 | ZNF211   | 0.00  | 0.18  | 0.00  | 0.29  |
| 10521 | DDX17    | -0.04 | 0.00  | -0.03 | 0.24  |
| 10522 | DEAF1    | 0.00  | 0.00  | 0.00  | NaN   |
| 10523 | CHERP    | 0.00  | 0.00  | 0.00  | NaN   |
| 10524 | HTATIP   | 0.02  | 0.00  | 0.05  | 0.27  |
| 10528 | NOL5A    | 0.02  | 0.00  | -0.03 | 0.15  |
| 10529 | NEBL     | -0.02 | 0.00  | 0.05  | 0.02  |
| 10534 | SSSCA1   | 0.05  | 0.09  | 0.14  | 0.09  |
| 10538 | BATF     | -0.02 | 0.00  | 0.00  | 0.36  |
| 10539 | TXNL2    | -0.04 | 0.00  | -0.03 | 0.14  |
| 10540 | DCTN2    | 0.02  | 0.00  | 0.00  | 0.20  |
| 10541 | ANP32B   | -0.02 | 0.00  | 0.00  | 0.17  |
| 10542 | HBXIP    | 0.00  | 0.00  | -0.03 | 0.01  |

|       |         |       |       |       |       |
|-------|---------|-------|-------|-------|-------|
| 10544 | PROCR   | 0.05  | 0.00  | 0.00  | 0.24  |
| 10548 | TM9SF1  | -0.02 | 0.00  | 0.00  | 0.06  |
| 10549 | PRDX4   | -0.05 | 0.00  | -0.11 | 0.14  |
| 10551 | AGR2    | 0.00  | 0.00  | 0.00  | 0.05  |
| 10552 | ARPC1A  | 0.02  | 0.00  | 0.00  | 0.16  |
| 10553 | HTATIP2 | 0.00  | 0.00  | -0.05 | -0.02 |
| 10554 | AGPAT1  | 0.00  | 0.00  | 0.05  | 0.13  |
| 10555 | AGPAT2  | 0.04  | 0.00  | 0.03  | 0.08  |
| 10556 | RPP30   | -0.02 | 0.00  | -0.05 | 0.15  |
| 10557 | RPP38   | -0.02 | 0.00  | 0.14  | 0.24  |
| 10558 | SPTLC1  | -0.02 | 0.00  | 0.00  | 0.09  |
| 10559 | SLC35A1 | -0.02 | 0.00  | -0.05 | 0.29  |
| 10560 | SLC19A2 | 0.02  | 0.00  | 0.05  | 0.02  |
| 10561 | IFI44   | -0.02 | 0.00  | -0.03 | 0.03  |
| 10564 | ARFGEF2 | 0.07  | 0.00  | 0.03  | 0.17  |
| 10566 | AKAP3   | -0.02 | 0.09  | 0.08  | 0.01  |
| 10567 | RABAC1  | 0.02  | 0.00  | -0.03 | 0.08  |
| 10568 | SLC34A2 | -0.05 | -0.09 | -0.05 | -0.07 |
| 10570 | DPYSL4  | -0.04 | 0.00  | 0.00  | 0.17  |
| 10574 | CCT7    | 0.00  | 0.00  | 0.00  | NaN   |
| 10575 | CCT4    | 0.00  | 0.00  | 0.00  | NaN   |
| 10576 | CCT2    | 0.04  | 0.09  | 0.05  | 0.48  |
| 10577 | NPC2    | -0.02 | 0.00  | 0.00  | 0.06  |
| 10578 | GNLY    | 0.00  | 0.00  | 0.00  | NaN   |
| 10579 | TACC2   | -0.04 | 0.00  | 0.00  | 0.09  |
| 10584 | COLEC10 | 0.22  | 0.18  | 0.38  | 0.05  |
| 10585 | POMT1   | 0.02  | 0.00  | 0.03  | 0.11  |
| 10587 | TXNRD2  | -0.02 | 0.00  | 0.08  | 0.19  |
| 10588 | MTHFS   | 0.00  | 0.00  | -0.03 | 0.01  |
| 10589 | DRAP1   | 0.02  | 0.00  | 0.03  | 0.15  |
| 10590 | SCGN    | 0.00  | 0.00  | 0.03  | -0.09 |
| 10594 | PRPF8   | -0.05 | 0.00  | 0.00  | 0.06  |
| 10595 | ERN2    | 0.02  | 0.00  | 0.00  | 0.07  |
| 10600 | USP16   | -0.02 | 0.00  | 0.05  | 0.22  |
| 10605 | PAIP1   | 0.02  | 0.09  | 0.00  | 0.29  |
| 10606 | PAICS   | -0.02 | 0.00  | 0.00  | 0.03  |
| 10609 | SC65    | 0.00  | 0.18  | 0.00  | 0.02  |
| 10612 | TRIM3   | -0.02 | 0.00  | -0.03 | 0.20  |
| 10618 | TGOLN2  | 0.00  | 0.00  | 0.00  | NaN   |
| 10621 | POLR3F  | 0.00  | 0.00  | -0.08 | 0.17  |
| 10626 | TRIM16  | -0.07 | 0.00  | -0.03 | 0.18  |
| 10628 | TXNIP   | 0.05  | 0.00  | 0.08  | -0.10 |
| 10629 | TAF6L   | 0.00  | 0.00  | 0.03  | 0.16  |
| 10632 | ATP5L   | -0.05 | 0.00  | 0.00  | 0.13  |
| 10633 | RRP22   | 0.00  | 0.00  | 0.03  | 0.03  |
| 10634 | GAS2L1  | 0.00  | 0.00  | 0.03  | 0.02  |
| 10636 | RGS14   | 0.00  | 0.00  | 0.00  | NaN   |

|       |         |       |       |       |       |
|-------|---------|-------|-------|-------|-------|
| 10638 | SPHAR   | 0.07  | 0.00  | 0.03  | 0.26  |
| 10645 | CAMKK2  | 0.02  | 0.09  | 0.00  | 0.17  |
| 10647 | SCGB1D2 | -0.02 | 0.00  | 0.03  | -0.10 |
| 10648 | SCGB1D1 | -0.02 | 0.00  | 0.03  | 0.14  |
| 10651 | MTX2    | 0.02  | 0.00  | 0.00  | 0.18  |
| 10652 | YKT6    | -0.02 | 0.00  | 0.05  | 0.22  |
| 10653 | SPINT2  | 0.02  | 0.09  | 0.08  | 0.25  |
| 10654 | PMVK    | 0.11  | 0.00  | 0.14  | 0.36  |
| 10656 | KHDRBS3 | 0.16  | 0.09  | 0.32  | 0.27  |
| 10657 | KHDRBS1 | 0.02  | 0.09  | 0.00  | 0.20  |
| 10658 | CUGBP1  | -0.02 | 0.00  | -0.03 | 0.00  |
| 10659 | CUGBP2  | 0.02  | 0.00  | 0.14  | 0.10  |
| 10660 | LBX1    | -0.02 | 0.00  | -0.03 | 0.15  |
| 10661 | KLF1    | 0.00  | -0.09 | 0.00  | 0.08  |
| 10664 | CTCF    | -0.04 | 0.00  | 0.00  | 0.06  |
| 10665 | C6orf10 | 0.00  | 0.00  | 0.05  | -0.06 |
| 10672 | GNA13   | 0.15  | 0.27  | 0.03  | 0.15  |
| 10675 | CSPG5   | -0.04 | 0.00  | 0.00  | -0.03 |
| 10677 | AVIL    | 0.02  | 0.09  | 0.00  | 0.22  |
| 10678 | B3GNT1  | 0.07  | 0.00  | 0.03  | 0.04  |
| 10681 | GNB5    | -0.02 | 0.00  | -0.05 | 0.14  |
| 10682 | EBP     | -0.04 | 0.00  | -0.05 | 0.20  |
| 10683 | DLL3    | 0.02  | 0.00  | 0.08  | 0.18  |
| 10686 | CLDN16  | 0.02  | 0.00  | 0.00  | 0.09  |
| 10687 | PNMA2   | -0.11 | -0.18 | -0.19 | 0.23  |
| 10690 | FUT9    | -0.02 | 0.00  | -0.03 | 0.02  |
| 10691 | GMEB1   | -0.02 | 0.09  | 0.00  | 0.04  |
| 10692 | RRH     | -0.02 | 0.00  | 0.00  | 0.09  |
| 10693 | CCT6B   | -0.02 | 0.09  | 0.03  | 0.31  |
| 10694 | CCT8    | -0.02 | 0.00  | 0.05  | 0.09  |
| 10695 | TNRC5   | 0.00  | 0.00  | 0.08  | 0.12  |
| 10712 | C1orf2  | 0.09  | 0.00  | 0.14  | 0.28  |
| 10714 | POLD3   | 0.05  | 0.09  | -0.03 | 0.36  |
| 10716 | TBR1    | -0.02 | 0.00  | 0.03  | -0.02 |
| 10721 | POLQ    | 0.00  | 0.00  | -0.03 | -0.21 |
| 10723 | SLC12A7 | 0.02  | 0.27  | 0.00  | 0.36  |
| 10724 | MGEA5   | 0.00  | 0.00  | -0.03 | 0.15  |
| 10725 | NFAT5   | -0.09 | 0.00  | 0.03  | 0.27  |
| 10726 | NUDC    | -0.04 | -0.09 | 0.00  | 0.14  |
| 10730 | YME1L1  | -0.02 | 0.00  | 0.00  | 0.17  |
| 10732 | TCFL5   | 0.04  | 0.09  | 0.08  | 0.18  |
| 10734 | STAG3   | 0.02  | 0.00  | 0.00  | 0.06  |
| 10735 | STAG2   | -0.05 | 0.00  | -0.08 | 0.25  |
| 10736 | SIX2    | 0.00  | 0.00  | 0.00  | NaN   |
| 10738 | RFPL3   | -0.02 | 0.00  | 0.03  | 0.27  |
| 10741 | RBBP9   | 0.00  | 0.00  | -0.08 | 0.22  |
| 10742 | RAI2    | -0.05 | -0.09 | -0.11 | 0.10  |

|       |         |       |       |       |       |
|-------|---------|-------|-------|-------|-------|
| 10743 | RAI1    | -0.05 | 0.00  | 0.00  | -0.07 |
| 10745 | PHTF1   | 0.00  | 0.00  | -0.03 | 0.00  |
| 10747 | MASP2   | 0.00  | 0.00  | 0.00  | NaN   |
| 10748 | KLRA1   | 0.00  | -0.18 | 0.08  | 0.17  |
| 10749 | KIF1C   | -0.04 | 0.00  | 0.00  | 0.09  |
| 10750 | GRAP    | -0.05 | 0.00  | 0.00  | 0.01  |
| 10752 | CHL1    | -0.02 | 0.00  | 0.00  | -0.04 |
| 10753 | CAPN9   | 0.09  | 0.00  | 0.03  | 0.20  |
| 10761 | PLAC1   | -0.04 | 0.00  | -0.08 | 0.01  |
| 10762 | NUP50   | -0.04 | 0.00  | -0.03 | 0.18  |
| 10766 | TOB2    | -0.02 | 0.00  | -0.03 | 0.08  |
| 10767 | HBS1L   | -0.02 | 0.00  | 0.16  | 0.40  |
| 10768 | AHCYL1  | 0.00  | 0.00  | -0.03 | 0.11  |
| 10775 | POP4    | 0.00  | 0.09  | 0.05  | 0.21  |
| 10776 | ARPP-19 | -0.02 | 0.00  | -0.05 | 0.34  |
| 10777 | ARPP-21 | 0.02  | 0.00  | -0.03 | 0.14  |
| 10781 | ZNF266  | 0.00  | 0.00  | 0.00  | NaN   |
| 10782 | ZNF274  | 0.00  | 0.18  | 0.00  | 0.16  |
| 10785 | WDR4    | 0.00  | 0.00  | 0.00  | 0.13  |
| 10786 | SLC17A3 | 0.00  | 0.00  | 0.03  | -0.15 |
| 10787 | NCKAP1  | 0.02  | 0.00  | -0.03 | 0.23  |
| 10788 | IQGAP2  | 0.00  | 0.00  | -0.14 | 0.22  |
| 10791 | VAMP5   | 0.02  | 0.00  | 0.00  | 0.04  |
| 10795 | ZNF268  | 0.00  | 0.00  | 0.00  | NaN   |
| 10797 | MTHFD2  | 0.00  | 0.00  | 0.00  | NaN   |
| 10798 | OR511   | -0.07 | -0.09 | 0.03  | 0.21  |
| 10799 | RPP40   | -0.02 | 0.00  | 0.08  | 0.32  |
| 10803 | CCR9    | -0.04 | 0.00  | 0.00  | 0.05  |
| 10807 | SDCCAG3 | 0.02  | 0.00  | 0.03  | 0.01  |
| 10810 | WASF3   | -0.05 | 0.00  | -0.08 | 0.04  |
| 10814 | CPLX2   | 0.00  | 0.00  | -0.03 | 0.04  |
| 10825 | NEU3    | 0.07  | 0.09  | 0.00  | -0.06 |
| 10826 | C5orf4  | 0.00  | 0.00  | 0.00  | NaN   |
| 10827 | C5orf3  | 0.00  | 0.00  | 0.00  | NaN   |
| 10841 | FTCD    | 0.00  | 0.09  | 0.00  | 0.09  |
| 10845 | CLPX    | 0.00  | 0.09  | -0.05 | 0.10  |
| 10846 | PDE10A  | -0.02 | 0.00  | -0.03 | 0.23  |
| 10847 | SRCAP   | 0.05  | 0.00  | 0.00  | 0.25  |
| 10855 | HPSE    | -0.04 | 0.00  | -0.03 | 0.07  |
| 10856 | RUVBL2  | 0.00  | 0.00  | -0.03 | 0.31  |
| 10857 | PGRMC1  | -0.05 | 0.00  | -0.08 | 0.08  |
| 10859 | LILRB1  | 0.00  | 0.09  | -0.03 | 0.08  |
| 10861 | SLC26A1 | 0.02  | 0.09  | 0.03  | -0.05 |
| 10863 | ADAM28  | -0.13 | -0.18 | -0.19 | 0.13  |
| 10864 | SLC22A7 | 0.00  | 0.00  | 0.11  | 0.00  |
| 10868 | USP20   | 0.02  | 0.00  | 0.00  | 0.17  |
| 10873 | ME3     | -0.02 | 0.09  | 0.00  | 0.18  |

|       |          |       |       |       |       |
|-------|----------|-------|-------|-------|-------|
| 10874 | NMU      | -0.02 | 0.00  | 0.00  | 0.11  |
| 10880 | ACTL7B   | -0.02 | 0.00  | 0.00  | -0.04 |
| 10881 | ACTL7A   | -0.02 | 0.00  | 0.00  | 0.24  |
| 10884 | MRPS30   | 0.04  | 0.18  | 0.00  | 0.21  |
| 10885 | WDR3     | 0.00  | 0.00  | -0.03 | -0.03 |
| 10892 | MALT1    | -0.02 | -0.09 | -0.03 | 0.06  |
| 10893 | MMP24    | 0.05  | 0.00  | 0.00  | 0.17  |
| 10894 | XLKD1    | 0.00  | 0.00  | -0.05 | -0.08 |
| 10898 | CPSF4    | 0.02  | 0.00  | 0.00  | 0.26  |
| 10899 | JTB      | 0.05  | 0.00  | 0.14  | 0.17  |
| 10900 | RPIP8    | -0.05 | 0.00  | 0.00  | 0.13  |
| 10904 | BLCAP    | 0.02  | 0.09  | 0.03  | 0.12  |
| 10905 | MAN1A2   | 0.02  | 0.00  | -0.03 | -0.03 |
| 10911 | UTS2     | -0.02 | 0.00  | 0.00  | 0.08  |
| 10912 | GADD45G  | -0.02 | 0.00  | 0.00  | -0.07 |
| 10913 | EDAR     | 0.00  | 0.00  | 0.00  | NaN   |
| 10915 | TCERG1   | 0.00  | 0.00  | 0.00  | NaN   |
| 10916 | MAGED2   | -0.04 | 0.00  | -0.05 | 0.10  |
| 10921 | RNPS1    | 0.04  | 0.09  | 0.00  | 0.13  |
| 10922 | FASTK    | 0.00  | 0.00  | 0.03  | -0.06 |
| 10928 | RALBP1   | -0.02 | -0.09 | 0.00  | 0.05  |
| 10930 | APOBEC2  | 0.00  | 0.00  | 0.08  | 0.03  |
| 10935 | PRDX3    | -0.04 | 0.00  | 0.00  | 0.05  |
| 10936 | GPR75    | 0.00  | 0.00  | 0.00  | NaN   |
| 10938 | EHD1     | 0.02  | 0.00  | 0.03  | 0.11  |
| 10939 | AFG3L2   | -0.02 | -0.09 | 0.00  | 0.08  |
| 10941 | UGT2A1   | -0.02 | 0.00  | 0.00  | -0.08 |
| 10942 | PRSS21   | 0.04  | 0.09  | 0.03  | -0.04 |
| 10943 | MSL3L1   | -0.05 | -0.09 | -0.14 | 0.08  |
| 10945 | KDELRL1  | 0.00  | 0.00  | -0.03 | 0.40  |
| 10946 | SF3A3    | 0.00  | 0.00  | 0.00  | NaN   |
| 10947 | AP3M2    | 0.04  | 0.09  | 0.11  | 0.46  |
| 10949 | HNRPA0   | 0.00  | 0.00  | -0.03 | 0.09  |
| 10950 | BTG3     | -0.04 | -0.18 | 0.05  | 0.26  |
| 10951 | CBX1     | 0.04  | 0.18  | 0.00  | 0.47  |
| 10952 | SEC61B   | -0.02 | 0.00  | 0.00  | 0.11  |
| 10953 | TOMM34   | 0.02  | 0.09  | 0.03  | 0.18  |
| 10963 | STIP1    | 0.00  | 0.00  | 0.03  | 0.13  |
| 10966 | RAB40B   | -0.02 | 0.09  | 0.08  | 0.15  |
| 10969 | EBNA1BP2 | 0.02  | 0.00  | 0.00  | 0.27  |
| 10970 | CKAP4    | 0.00  | 0.00  | 0.00  | NaN   |
| 10971 | YWHAQ    | -0.02 | 0.00  | 0.00  | 0.22  |
| 10975 | UQCR     | 0.00  | 0.00  | -0.03 | 0.10  |
| 10981 | RAB32    | 0.00  | 0.00  | 0.03  | 0.09  |
| 10982 | MAPRE2   | 0.00  | -0.09 | -0.03 | 0.05  |
| 10983 | CCNI     | -0.02 | 0.00  | -0.03 | 0.16  |
| 10987 | COPS5    | 0.13  | 0.00  | 0.16  | 0.24  |

|       |         |       |       |       |       |
|-------|---------|-------|-------|-------|-------|
| 10988 | METAP2  | 0.00  | 0.09  | 0.00  | 0.13  |
| 10989 | IMMT    | 0.00  | 0.00  | 0.00  | NaN   |
| 10990 | LILRB5  | 0.00  | 0.09  | -0.03 | -0.10 |
| 10991 | SLC38A3 | 0.00  | 0.00  | 0.03  | 0.24  |
| 10992 | SF3B2   | 0.02  | 0.00  | 0.03  | 0.14  |
| 10993 | SDS     | 0.02  | 0.00  | 0.00  | -0.03 |
| 10994 | ILVBL   | 0.02  | 0.00  | 0.00  | 0.25  |
| 11005 | SPINK5  | 0.00  | 0.00  | 0.00  | NaN   |
| 11006 | LILRB4  | 0.00  | 0.09  | -0.03 | -0.04 |
| 11009 | IL24    | 0.09  | 0.00  | 0.00  | 0.10  |
| 11011 | TLK2    | 0.20  | 0.09  | 0.03  | 0.48  |
| 11012 | KLK11   | 0.00  | 0.00  | -0.03 | -0.01 |
| 11014 | KDELR2  | 0.00  | 0.09  | 0.03  | -0.03 |
| 11015 | KDELR3  | -0.04 | 0.00  | -0.03 | -0.04 |
| 11016 | ATF7    | 0.02  | 0.09  | -0.03 | -0.18 |
| 11017 | RY1     | 0.02  | 0.00  | 0.00  | 0.18  |
| 11020 | RABL4   | -0.04 | 0.00  | 0.03  | 0.12  |
| 11021 | RAB35   | 0.02  | 0.00  | 0.00  | 0.06  |
| 11022 | TDRKH   | 0.07  | 0.00  | 0.19  | 0.26  |
| 11024 | LILRA1  | 0.00  | 0.09  | -0.03 | 0.06  |
| 11026 | LILRA3  | 0.00  | 0.09  | -0.03 | -0.05 |
| 11027 | LILRA2  | 0.00  | 0.09  | -0.03 | -0.01 |
| 11030 | RBPMS   | -0.09 | -0.18 | -0.19 | 0.21  |
| 11031 | RAB31   | -0.02 | -0.09 | 0.00  | 0.23  |
| 11033 | CENTA1  | 0.02  | 0.00  | 0.05  | -0.06 |
| 11034 | DSTN    | 0.00  | 0.00  | -0.08 | 0.24  |
| 11037 | SALF    | 0.02  | 0.00  | 0.00  | 0.01  |
| 11040 | PIM2    | -0.04 | 0.00  | -0.05 | -0.01 |
| 11041 | B3GNT6  | 0.07  | 0.09  | 0.03  | 0.03  |
| 11043 | MID2    | -0.05 | 0.00  | -0.08 | -0.11 |
| 11044 | POLS    | 0.02  | 0.18  | 0.00  | 0.33  |
| 11045 | UPK1A   | 0.00  | 0.09  | 0.05  | 0.08  |
| 11047 | ADRM1   | 0.05  | 0.09  | 0.11  | 0.43  |
| 11052 | CPSF6   | 0.04  | 0.09  | 0.05  | 0.22  |
| 11054 | OGFR    | 0.04  | 0.09  | 0.08  | 0.23  |
| 11055 | ZPBP    | -0.05 | 0.00  | 0.05  | -0.04 |
| 11059 | WWP1    | 0.15  | 0.09  | 0.14  | 0.35  |
| 11060 | WWP2    | -0.09 | 0.00  | 0.03  | 0.11  |
| 11063 | SOX30   | 0.00  | 0.00  | 0.00  | NaN   |
| 11065 | UBE2C   | 0.04  | 0.00  | 0.03  | 0.18  |
| 11071 | ATP9B   | -0.02 | -0.09 | 0.00  | 0.13  |
| 11072 | DUSP14  | 0.00  | 0.09  | 0.05  | 0.26  |
| 11073 | TOPBP1  | 0.00  | 0.00  | 0.00  | NaN   |
| 11074 | TRIM31  | 0.00  | 0.00  | 0.05  | -0.02 |
| 11075 | STMN2   | 0.11  | 0.09  | 0.14  | -0.05 |
| 11077 | HSF2BP  | 0.00  | 0.00  | 0.00  | 0.22  |
| 11079 | RER1    | -0.02 | 0.00  | 0.03  | 0.12  |



|       |          |       |      |       |       |
|-------|----------|-------|------|-------|-------|
| 11080 | DNAJB4   | -0.02 | 0.00 | -0.03 | 0.11  |
| 11081 | KERA     | 0.00  | 0.09 | 0.00  | 0.01  |
| 11082 | ESM1     | 0.00  | 0.00 | -0.11 | -0.10 |
| 11085 | ADAM30   | 0.00  | 0.00 | 0.00  | 0.01  |
| 11086 | ADAM29   | -0.02 | 0.00 | -0.05 | 0.11  |
| 11092 | C9orf9   | 0.02  | 0.00 | 0.00  | 0.13  |
| 11095 | ADAMTS8  | -0.05 | 0.00 | -0.03 | 0.06  |
| 11096 | ADAMTS5  | 0.00  | 0.00 | 0.03  | 0.10  |
| 11099 | PTPN21   | -0.04 | 0.00 | 0.00  | 0.11  |
| 11102 | RPP14    | -0.04 | 0.00 | 0.00  | 0.02  |
| 11104 | KATNA1   | 0.00  | 0.00 | -0.03 | 0.17  |
| 11107 | PRDM5    | 0.00  | 0.00 | -0.03 | -0.07 |
| 11108 | PRDM4    | 0.00  | 0.00 | 0.00  | NaN   |
| 11113 | CIT      | 0.00  | 0.00 | 0.00  | NaN   |
| 11118 | BTN3A2   | 0.00  | 0.00 | 0.03  | 0.20  |
| 11119 | BTN3A1   | 0.00  | 0.00 | 0.03  | 0.18  |
| 11120 | BTN2A1   | 0.00  | 0.00 | 0.03  | 0.06  |
| 11122 | PTPRT    | 0.02  | 0.00 | 0.03  | 0.11  |
| 11123 | DSCR1L2  | 0.00  | 0.00 | 0.00  | NaN   |
| 11124 | FAF1     | 0.00  | 0.00 | -0.03 | -0.01 |
| 11127 | KIF3A    | 0.00  | 0.00 | -0.03 | 0.20  |
| 11130 | ZWINT    | -0.02 | 0.00 | -0.03 | 0.05  |
| 11131 | CAPN11   | 0.00  | 0.00 | 0.11  | -0.13 |
| 11132 | CAPN10   | 0.00  | 0.00 | 0.00  | NaN   |
| 11133 | KPTN     | -0.04 | 0.00 | -0.03 | 0.09  |
| 11136 | SLC7A9   | 0.00  | 0.00 | 0.05  | 0.18  |
| 11137 | PWP1     | 0.00  | 0.00 | 0.00  | NaN   |
| 11140 | CDC37    | 0.00  | 0.00 | 0.00  | NaN   |
| 11141 | IL1RAPL1 | -0.07 | 0.00 | -0.11 | -0.10 |
| 11142 | PKIG     | 0.02  | 0.09 | 0.03  | 0.29  |
| 11144 | DMC1     | -0.04 | 0.00 | -0.03 | -0.12 |
| 11145 | HRASLS3  | 0.00  | 0.00 | 0.03  | -0.19 |
| 11147 | HHLA3    | -0.02 | 0.00 | -0.03 | 0.01  |
| 11148 | HHLA2    | 0.00  | 0.00 | -0.03 | -0.19 |
| 11153 | HYPE     | 0.00  | 0.00 | 0.00  | NaN   |
| 11154 | AP4S1    | -0.02 | 0.00 | 0.00  | 0.10  |
| 11156 | PTP4A3   | 0.16  | 0.00 | 0.41  | 0.33  |
| 11157 | LSM6     | 0.02  | 0.00 | 0.00  | 0.15  |
| 11161 | C14orf1  | -0.02 | 0.00 | 0.00  | 0.05  |
| 11162 | NUDT6    | 0.00  | 0.00 | -0.03 | 0.10  |
| 11163 | NUDT4    | 0.00  | 0.09 | 0.00  | 0.13  |
| 11165 | NUDT3    | 0.00  | 0.00 | 0.05  | 0.23  |
| 11166 | SOX21    | -0.02 | 0.00 | -0.05 | 0.10  |
| 11167 | FSTL1    | 0.00  | 0.00 | -0.03 | 0.46  |
| 11173 | ADAMTS7  | 0.00  | 0.00 | -0.03 | -0.02 |
| 11174 | ADAMTS6  | 0.00  | 0.00 | -0.11 | -0.07 |
| 11176 | BAZ2A    | 0.00  | 0.00 | 0.00  | NaN   |

|       |         |       |       |       |       |
|-------|---------|-------|-------|-------|-------|
| 11177 | BAZ1A   | 0.02  | 0.09  | 0.00  | 0.54  |
| 11178 | LZTS1   | -0.13 | -0.18 | -0.22 | 0.19  |
| 11180 | WDR6    | -0.04 | 0.00  | 0.00  | 0.18  |
| 11181 | TREH    | -0.05 | 0.00  | 0.00  | 0.15  |
| 11183 | MAP4K5  | 0.02  | 0.00  | 0.00  | 0.18  |
| 11184 | MAP4K1  | 0.02  | 0.09  | 0.05  | 0.19  |
| 11186 | RASSF1  | 0.00  | 0.00  | 0.00  | NaN   |
| 11187 | PKP3    | 0.02  | 0.09  | 0.00  | -0.02 |
| 11188 | NISCH   | 0.00  | 0.00  | 0.00  | NaN   |
| 11189 | TNRC4   | 0.07  | 0.00  | 0.19  | -0.13 |
| 11193 | WBP4    | -0.05 | 0.00  | -0.05 | 0.26  |
| 11194 | ABCB8   | 0.02  | 0.00  | 0.00  | 0.01  |
| 11197 | WIF1    | 0.00  | 0.00  | 0.00  | NaN   |
| 11199 | ANXA10  | -0.02 | 0.00  | -0.08 | -0.10 |
| 11200 | CHEK2   | -0.02 | -0.09 | 0.03  | 0.26  |
| 11201 | POLI    | -0.02 | -0.18 | -0.03 | 0.02  |
| 11202 | KLK8    | 0.00  | 0.00  | -0.03 | -0.21 |
| 11211 | FZD10   | 0.00  | 0.00  | 0.00  | NaN   |
| 11212 | PROSC   | 0.18  | 0.09  | 0.08  | 0.74  |
| 11215 | AKAP11  | -0.05 | 0.00  | -0.05 | 0.31  |
| 11216 | AKAP10  | -0.04 | 0.09  | 0.03  | 0.53  |
| 11221 | DUSP10  | 0.07  | 0.00  | 0.00  | 0.15  |
| 11222 | MRPL3   | 0.00  | 0.00  | 0.00  | NaN   |
| 11224 | RPL35   | -0.02 | 0.00  | 0.00  | -0.01 |
| 11226 | GALNT6  | 0.02  | 0.00  | -0.03 | 0.20  |
| 11232 | POLG2   | 0.16  | 0.18  | 0.03  | 0.40  |
| 11235 | PDCD10  | 0.02  | 0.00  | 0.00  | 0.17  |
| 11237 | RNF24   | 0.02  | 0.00  | -0.03 | 0.20  |
| 11238 | CA5B    | -0.05 | 0.00  | -0.11 | -0.01 |
| 11243 | PMF1    | 0.07  | 0.00  | 0.14  | 0.37  |
| 11248 | NXPH3   | 0.11  | 0.18  | 0.03  | 0.04  |
| 11250 | GPR45   | 0.00  | 0.00  | 0.00  | NaN   |
| 11251 | GPR44   | -0.02 | 0.00  | 0.05  | 0.19  |
| 11252 | PACSIN2 | -0.02 | 0.00  | -0.03 | 0.16  |
| 11253 | MAN1B1  | 0.02  | 0.00  | 0.03  | 0.12  |
| 11254 | SLC6A14 | -0.05 | 0.00  | -0.08 | -0.15 |
| 11255 | HRH3    | 0.04  | 0.09  | 0.14  | 0.12  |
| 11258 | DCTN3   | 0.00  | 0.00  | 0.00  | 0.22  |
| 11260 | XPOT    | 0.00  | 0.00  | 0.00  | NaN   |
| 11261 | CHP     | -0.02 | 0.09  | -0.14 | 0.07  |
| 11262 | SP140   | -0.02 | 0.00  | 0.00  | 0.02  |
| 11264 | PXMP4   | 0.00  | 0.00  | 0.00  | NaN   |
| 11266 | DUSP12  | 0.07  | 0.00  | 0.11  | 0.35  |
| 11274 | USP18   | -0.02 | 0.00  | 0.00  | -0.07 |
| 11275 | KLHL2   | 0.00  | 0.00  | -0.05 | -0.01 |
| 11277 | TREX1   | -0.04 | 0.00  | 0.00  | 0.10  |
| 11278 | KLF12   | -0.07 | -0.09 | -0.14 | 0.15  |

|       |           |       |       |       |       |
|-------|-----------|-------|-------|-------|-------|
| 11279 | KLF8      | -0.05 | 0.00  | -0.05 | -0.06 |
| 11282 | MGAT4B    | 0.02  | 0.00  | -0.03 | 0.28  |
| 11283 | CYP4F8    | 0.00  | 0.00  | 0.00  | NaN   |
| 11284 | PNKP      | 0.00  | 0.00  | -0.03 | 0.32  |
| 11285 | B4GALT7   | 0.00  | 0.00  | 0.00  | NaN   |
| 11313 | LYPLA2    | 0.00  | 0.00  | 0.00  | NaN   |
| 11316 | COPE      | 0.00  | 0.00  | 0.00  | 0.21  |
| 11317 | RBPSUHL   | 0.04  | 0.09  | 0.03  | 0.09  |
| 11318 | ADMR      | 0.02  | 0.00  | 0.00  | -0.05 |
| 11320 | MGAT4A    | 0.02  | 0.00  | 0.00  | 0.05  |
| 11329 | STK38     | 0.02  | 0.00  | 0.05  | 0.26  |
| 11330 | CTRC      | -0.02 | 0.00  | 0.00  | 0.10  |
| 11333 | PDAP1     | 0.02  | 0.00  | 0.00  | 0.14  |
| 11335 | CBX3      | 0.00  | 0.18  | 0.03  | 0.30  |
| 11337 | GABARAP   | -0.05 | 0.00  | 0.00  | 0.09  |
| 11339 | OIP5      | -0.02 | 0.09  | -0.14 | 0.09  |
| 11341 | SCRG1     | -0.02 | 0.00  | -0.05 | -0.05 |
| 11342 | RNF13     | 0.02  | 0.00  | 0.03  | 0.19  |
| 11343 | MGLL      | 0.00  | 0.00  | -0.03 | -0.14 |
| 11345 | GABARAPL2 | -0.09 | 0.00  | 0.03  | 0.18  |
| 22797 | TFEC      | 0.00  | 0.00  | -0.03 | 0.03  |
| 22800 | RRAS2     | -0.02 | 0.00  | -0.03 | 0.19  |
| 22802 | CLCA4     | -0.02 | 0.00  | -0.03 | -0.06 |
| 22808 | MRAS      | 0.02  | 0.00  | 0.00  | -0.09 |
| 22809 | ATF5      | 0.00  | 0.00  | -0.03 | 0.19  |
| 22822 | PHLDA1    | -0.02 | 0.00  | 0.00  | 0.12  |
| 22826 | DNAJC8    | -0.02 | 0.09  | 0.00  | 0.20  |
| 22827 | SIAHBP1   | 0.16  | 0.00  | 0.35  | 0.53  |
| 22832 | KIAA1009  | -0.02 | 0.00  | -0.05 | -0.05 |
| 22856 | CHSY1     | -0.02 | 0.00  | 0.00  | 0.02  |
| 22858 | ICK       | -0.02 | 0.00  | 0.08  | 0.10  |
| 22863 | KIAA0831  | 0.00  | 0.00  | 0.00  | 0.11  |
| 22871 | NLGN1     | 0.04  | 0.00  | 0.03  | -0.03 |
| 22873 | DZIP1     | -0.02 | 0.00  | -0.05 | 0.21  |
| 22875 | ENPP4     | 0.00  | 0.00  | 0.05  | 0.04  |
| 22878 | KIAA1012  | 0.02  | -0.09 | 0.00  | 0.34  |
| 22881 | ANKRD6    | -0.04 | 0.00  | 0.00  | 0.05  |
| 22883 | CLSTN1    | -0.02 | 0.00  | 0.00  | 0.11  |
| 22889 | KIAA0907  | 0.09  | 0.00  | 0.14  | 0.52  |
| 22895 | RPH3A     | 0.02  | 0.00  | 0.00  | -0.03 |
| 22899 | ARHGEF15  | -0.05 | 0.00  | 0.00  | 0.21  |
| 22903 | BTBD3     | 0.00  | 0.00  | -0.05 | 0.20  |
| 22905 | EPN2      | -0.04 | 0.09  | 0.03  | 0.29  |
| 22908 | SACM1L    | -0.04 | 0.00  | 0.00  | 0.09  |
| 22913 | RALY      | 0.00  | 0.00  | 0.00  | NaN   |
| 22916 | NCBP2     | 0.02  | 0.09  | -0.03 | 0.36  |
| 22919 | MAPRE1    | 0.00  | 0.00  | 0.00  | NaN   |

|       |           |       |       |       |       |
|-------|-----------|-------|-------|-------|-------|
| 22920 | KIFAP3    | 0.02  | 0.00  | 0.05  | 0.22  |
| 22924 | MAPRE3    | 0.00  | 0.00  | 0.00  | NaN   |
| 22925 | PLA2R1    | -0.02 | 0.00  | 0.03  | 0.09  |
| 22926 | ATF6      | 0.07  | 0.00  | 0.08  | 0.27  |
| 22932 | POMZP3    | 0.02  | 0.00  | 0.03  | 0.11  |
| 22933 | SIRT2     | 0.02  | 0.09  | 0.05  | 0.24  |
| 22934 | RPIA      | 0.00  | 0.00  | 0.00  | NaN   |
| 22936 | ELL2      | 0.00  | 0.00  | -0.14 | 0.18  |
| 22937 | SCAP      | -0.04 | 0.00  | 0.00  | 0.03  |
| 22938 | SNW1      | -0.02 | 0.00  | -0.03 | 0.21  |
| 22939 | PTRF      | -0.04 | 0.00  | 0.00  | 0.05  |
| 22941 | SHANK2    | 0.11  | 0.09  | 0.03  | 0.30  |
| 22943 | DKK1      | -0.04 | 0.00  | -0.03 | 0.15  |
| 22944 | KIN       | 0.00  | 0.00  | 0.14  | 0.20  |
| 22948 | CCT5      | 0.02  | 0.18  | 0.00  | 0.30  |
| 22950 | SLC4A1AP  | 0.00  | 0.00  | 0.00  | NaN   |
| 22953 | P2RX2     | 0.00  | 0.00  | 0.00  | NaN   |
| 22955 | SCMH1     | 0.00  | 0.00  | 0.00  | NaN   |
| 22977 | AKR7A3    | 0.00  | 0.00  | 0.00  | NaN   |
| 22978 | NT5C2     | 0.00  | 0.00  | -0.03 | 0.13  |
| 22981 | KIAA0980  | 0.02  | 0.00  | -0.03 | 0.15  |
| 22986 | SORCS3    | -0.02 | 0.00  | -0.03 | -0.11 |
| 22992 | FBXL11    | 0.11  | 0.09  | 0.03  | 0.34  |
| 23008 | KIAA0265  | 0.02  | 0.00  | 0.00  | 0.11  |
| 23011 | RAB21     | 0.04  | 0.00  | 0.03  | 0.60  |
| 23012 | STK38L    | 0.00  | -0.09 | 0.05  | 0.18  |
| 23014 | FBXO21    | 0.02  | 0.00  | -0.03 | 0.41  |
| 23037 | PDZD2     | 0.02  | 0.18  | 0.00  | 0.28  |
| 23040 | MYT1L     | -0.02 | 0.00  | 0.00  | 0.00  |
| 23049 | SMG1      | 0.02  | 0.09  | 0.00  | 0.15  |
| 23054 | NCOA6     | 0.04  | 0.00  | 0.00  | 0.33  |
| 23062 | GGA2      | 0.02  | 0.00  | 0.00  | 0.14  |
| 23065 | KIAA0090  | 0.00  | 0.00  | 0.00  | NaN   |
| 23070 | KIAA0082  | 0.02  | 0.00  | 0.05  | 0.12  |
| 23074 | KIAA0701  | 0.00  | 0.00  | 0.03  | 0.14  |
| 23075 | SWAP70    | 0.00  | 0.00  | -0.05 | -0.04 |
| 23076 | KIAA0179  | 0.00  | 0.00  | 0.00  | 0.25  |
| 23078 | KIAA0564  | -0.05 | 0.00  | -0.05 | 0.08  |
| 23080 | KIAA0241  | -0.02 | 0.09  | -0.03 | 0.44  |
| 23089 | PEG10     | 0.02  | 0.00  | -0.03 | -0.11 |
| 23095 | KIF1B     | 0.00  | 0.00  | 0.00  | NaN   |
| 23107 | MRPS27    | 0.00  | 0.00  | -0.11 | 0.14  |
| 23114 | NFASC     | 0.07  | 0.00  | 0.03  | 0.06  |
| 23116 | KIAA0423  | 0.00  | 0.00  | -0.03 | 0.26  |
| 23118 | MAP3K7IP2 | 0.00  | 0.00  | -0.03 | 0.56  |
| 23119 | HIC2      | 0.00  | 0.00  | 0.05  | 0.16  |
| 23122 | CLASP2    | 0.02  | 0.00  | -0.03 | 0.39  |

|       |          |       |       |       |       |
|-------|----------|-------|-------|-------|-------|
| 23136 | EPB41L3  | 0.00  | -0.09 | -0.03 | 0.25  |
| 23152 | CIC      | 0.02  | 0.00  | -0.03 | -0.04 |
| 23161 | SNX13    | 0.00  | 0.00  | 0.00  | 0.32  |
| 23162 | MAPK8IP3 | 0.04  | 0.18  | 0.00  | 0.26  |
| 23163 | GGA3     | 0.04  | 0.18  | 0.05  | 0.44  |
| 23166 | STAB1    | 0.00  | 0.00  | 0.00  | NaN   |
| 23172 | KIAA0157 | -0.04 | 0.00  | 0.03  | 0.30  |
| 23173 | METAP1   | -0.02 | 0.00  | 0.03  | 0.26  |
| 23175 | LPIN1    | -0.02 | 0.00  | 0.00  | 0.29  |
| 23178 | PASK     | 0.00  | 0.00  | 0.00  | NaN   |
| 23190 | UBXD2    | -0.02 | 0.00  | 0.00  | 0.13  |
| 23191 | CYFIP1   | -0.02 | 0.09  | -0.08 | 0.38  |
| 23194 | FBXL7    | 0.02  | 0.18  | 0.00  | 0.05  |
| 23195 | MDN1     | -0.04 | 0.00  | 0.00  | 0.02  |
| 23199 | KIAA0182 | -0.09 | 0.00  | 0.00  | 0.09  |
| 23200 | ATP11B   | 0.04  | 0.00  | 0.00  | 0.05  |
| 23203 | INPP5E   | 0.02  | 0.00  | 0.03  | 0.03  |
| 23212 | RRS1     | 0.11  | 0.00  | 0.16  | 0.24  |
| 23216 | TBC1D1   | -0.05 | 0.00  | -0.03 | 0.17  |
| 23228 | PLCL2    | -0.02 | 0.00  | -0.03 | 0.08  |
| 23229 | ARHGEF9  | -0.04 | 0.00  | -0.03 | 0.10  |
| 23236 | PLCB1    | 0.00  | 0.00  | -0.05 | 0.17  |
| 23237 | ARC      | 0.16  | 0.09  | 0.38  | -0.21 |
| 23240 | KIAA0922 | -0.02 | 0.00  | -0.03 | 0.07  |
| 23245 | ASTN2    | -0.02 | 0.00  | 0.00  | 0.20  |
| 23246 | BOP1     | 0.16  | 0.00  | 0.35  | 0.35  |
| 23247 | KIAA0556 | 0.02  | 0.00  | 0.00  | 0.04  |
| 23255 | KIAA0802 | 0.00  | -0.09 | 0.00  | 0.07  |
| 23263 | MCF2L    | 0.00  | 0.00  | 0.00  | 0.33  |
| 23273 | KIAA0367 | -0.02 | 0.00  | 0.00  | 0.05  |
| 23274 | KIAA0350 | 0.04  | 0.00  | 0.00  | 0.10  |
| 23277 | KIAA0664 | -0.05 | 0.00  | -0.03 | 0.05  |
| 23279 | NUP160   | -0.02 | 0.00  | -0.03 | 0.39  |
| 23281 | KIAA0774 | -0.05 | 0.00  | -0.05 | -0.06 |
| 23287 | AGTPBP1  | -0.02 | 0.00  | 0.00  | 0.04  |
| 23299 | BICD2    | -0.02 | 0.00  | 0.00  | 0.05  |
| 23302 | KIAA0523 | -0.05 | 0.00  | 0.00  | 0.07  |
| 23303 | KIF13B   | -0.13 | -0.18 | -0.19 | 0.27  |
| 23321 | TRIM2    | -0.02 | 0.00  | -0.03 | 0.09  |
| 23322 | KIAA1005 | -0.05 | 0.00  | 0.00  | 0.20  |
| 23327 | NEDD4L   | -0.02 | 0.00  | -0.03 | -0.02 |
| 23332 | CLASP1   | 0.00  | 0.00  | 0.00  | NaN   |
| 23334 | KIAA0467 | 0.00  | 0.00  | 0.00  | NaN   |
| 23335 | WDR7     | -0.02 | -0.09 | -0.03 | 0.12  |
| 23336 | DMN      | 0.05  | 0.00  | 0.00  | -0.01 |
| 23339 | VPS39    | -0.04 | 0.09  | -0.14 | 0.15  |
| 23351 | KIAA0323 | -0.02 | 0.00  | 0.00  | 0.02  |

|       |          |       |      |       |       |
|-------|----------|-------|------|-------|-------|
| 23365 | ARHGEF12 | -0.07 | 0.00 | 0.00  | 0.07  |
| 23366 | KIAA0895 | -0.02 | 0.00 | 0.00  | 0.35  |
| 23369 | PUM2     | 0.00  | 0.00 | 0.00  | NaN   |
| 23376 | KIAA0776 | 0.00  | 0.09 | -0.03 | 0.35  |
| 23378 | KIAA0409 | -0.02 | 0.00 | -0.03 | 0.08  |
| 23380 | SRGAP2   | 0.07  | 0.00 | 0.00  | 0.16  |
| 23382 | KIAA0828 | 0.02  | 0.00 | 0.00  | -0.01 |
| 23385 | NCSTN    | 0.05  | 0.00 | 0.14  | 0.29  |
| 23387 | KIAA0999 | -0.07 | 0.00 | 0.00  | 0.16  |
| 23394 | ADNP     | 0.07  | 0.09 | 0.05  | 0.25  |
| 23395 | LARS2    | -0.04 | 0.00 | 0.00  | 0.09  |
| 23396 | PIP5K1C  | 0.00  | 0.00 | 0.00  | NaN   |
| 23401 | FRAT2    | -0.02 | 0.00 | -0.03 | 0.12  |
| 23405 | DICER1   | -0.02 | 0.00 | -0.03 | 0.12  |
| 23408 | SIRT5    | 0.00  | 0.00 | 0.11  | 0.30  |
| 23409 | SIRT4    | 0.02  | 0.00 | 0.00  | 0.06  |
| 23410 | SIRT3    | 0.00  | 0.00 | 0.00  | NaN   |
| 23411 | SIRT1    | -0.04 | 0.00 | -0.05 | 0.24  |
| 23413 | FREQ     | 0.02  | 0.00 | 0.00  | 0.11  |
| 23415 | KCNH4    | -0.04 | 0.00 | 0.00  | 0.11  |
| 23417 | MLYCD    | -0.09 | 0.00 | 0.00  | 0.12  |
| 23418 | CRB1     | 0.07  | 0.00 | 0.03  | -0.04 |
| 23421 | ITGB3BP  | -0.02 | 0.00 | 0.00  | 0.08  |
| 23426 | GRIP1    | 0.00  | 0.00 | 0.00  | NaN   |
| 23428 | SLC7A8   | -0.02 | 0.00 | 0.00  | -0.07 |
| 23429 | RYBP     | -0.05 | 0.00 | 0.00  | 0.16  |
| 23430 | TPSD1    | 0.04  | 0.18 | 0.03  | -0.26 |
| 23431 | AP4E1    | -0.02 | 0.00 | -0.05 | 0.17  |
| 23435 | TARDBP   | 0.00  | 0.00 | 0.00  | NaN   |
| 23436 | ELA3B    | 0.00  | 0.00 | 0.00  | NaN   |
| 23438 | HARSL    | 0.00  | 0.00 | 0.00  | NaN   |
| 23439 | ATP1B4   | -0.05 | 0.00 | -0.08 | -0.13 |
| 23443 | SLC35A3  | -0.02 | 0.00 | -0.03 | 0.11  |
| 23450 | SF3B3    | -0.09 | 0.00 | 0.03  | 0.34  |
| 23451 | SF3B1    | 0.02  | 0.00 | 0.00  | 0.29  |
| 23457 | ABCB9    | 0.02  | 0.00 | 0.00  | 0.03  |
| 23460 | ABCA6    | 0.05  | 0.09 | 0.03  | -0.07 |
| 23461 | ABCA5    | 0.05  | 0.09 | 0.03  | 0.33  |
| 23462 | HEY1     | 0.13  | 0.09 | 0.14  | 0.20  |
| 23463 | ICMT     | -0.02 | 0.00 | 0.00  | 0.11  |
| 23464 | GCAT     | -0.04 | 0.00 | 0.03  | 0.11  |
| 23466 | CBX6     | -0.04 | 0.00 | -0.03 | 0.13  |
| 23468 | CBX5     | 0.02  | 0.00 | -0.03 | 0.11  |
| 23469 | PHF3     | -0.02 | 0.00 | 0.05  | 0.44  |
| 23473 | CAPN7    | -0.02 | 0.00 | 0.00  | 0.20  |
| 23476 | BRD4     | 0.02  | 0.00 | 0.00  | 0.08  |
| 23480 | SEC61G   | -0.02 | 0.00 | 0.00  | 0.19  |

|       |          |       |       |       |       |
|-------|----------|-------|-------|-------|-------|
| 23481 | PES1     | 0.00  | 0.00  | 0.05  | -0.11 |
| 23484 | LEPROTL1 | -0.09 | 0.00  | -0.19 | 0.39  |
| 23493 | HEY2     | -0.02 | 0.00  | 0.00  | -0.05 |
| 23498 | HAAO     | 0.00  | 0.00  | 0.00  | NaN   |
| 23499 | MACF1    | 0.00  | 0.09  | 0.00  | 0.15  |
| 23500 | DAAM2    | 0.00  | 0.00  | 0.08  | 0.10  |
| 23506 | KIAA0240 | 0.00  | 0.00  | 0.08  | 0.14  |
| 23509 | POFUT1   | 0.00  | 0.00  | 0.00  | NaN   |
| 23513 | SCRIB    | 0.16  | 0.00  | 0.35  | 0.30  |
| 23521 | RPL13A   | 0.02  | 0.00  | -0.03 | 0.45  |
| 23523 | CABIN1   | 0.00  | 0.00  | 0.05  | -0.05 |
| 23524 | SRRM2    | 0.04  | 0.09  | 0.00  | 0.16  |
| 23527 | CENTB2   | 0.02  | 0.09  | 0.00  | 0.23  |
| 23528 | ZNF281   | 0.09  | 0.00  | 0.03  | 0.25  |
| 23530 | NNT      | 0.02  | 0.09  | 0.00  | -0.01 |
| 23531 | MMD      | 0.13  | 0.27  | 0.03  | 0.34  |
| 23532 | PRAME    | -0.02 | 0.00  | 0.03  | 0.18  |
| 23536 | ADAT1    | -0.09 | 0.00  | 0.03  | 0.13  |
| 23538 | OR52A1   | -0.02 | -0.09 | -0.03 | -0.02 |
| 23539 | SLC16A8  | -0.04 | 0.00  | 0.03  | 0.17  |
| 23541 | SEC14L2  | 0.00  | 0.00  | 0.05  | 0.08  |
| 23542 | MAPK8IP2 | 0.00  | 0.09  | 0.03  | 0.00  |
| 23543 | RBM9     | -0.02 | 0.00  | 0.03  | 0.17  |
| 23544 | SEZ6L    | -0.05 | -0.09 | 0.03  | 0.11  |
| 23545 | ATP6V0A2 | 0.02  | 0.00  | 0.00  | 0.21  |
| 23546 | SYNGR4   | 0.00  | 0.00  | -0.03 | -0.19 |
| 23549 | DNPEP    | 0.00  | 0.00  | 0.00  | NaN   |
| 23552 | CCRK     | -0.02 | 0.00  | 0.00  | 0.03  |
| 23553 | HYAL4    | 0.00  | 0.00  | -0.03 | 0.12  |
| 23556 | PIGN     | -0.02 | -0.09 | 0.03  | 0.19  |
| 23558 | WBP2     | 0.04  | 0.27  | 0.03  | 0.24  |
| 23562 | CLDN14   | 0.00  | 0.00  | 0.00  | 0.04  |
| 23563 | CHST5    | -0.09 | 0.00  | 0.03  | 0.06  |
| 23564 | DDAH2    | 0.00  | 0.00  | 0.05  | 0.07  |
| 23566 | EDG7     | -0.02 | 0.00  | -0.03 | 0.00  |
| 23583 | SMUG1    | 0.02  | 0.00  | -0.03 | 0.44  |
| 23594 | ORC6L    | -0.11 | 0.09  | 0.03  | 0.26  |
| 23595 | ORC3L    | -0.02 | 0.00  | -0.05 | 0.33  |
| 23596 | OPN3     | 0.07  | 0.00  | 0.05  | 0.11  |
| 23600 | AMACR    | 0.02  | 0.27  | 0.00  | 0.42  |
| 23603 | CORO1C   | 0.00  | 0.00  | 0.00  | NaN   |
| 23604 | DAPK2    | 0.00  | 0.09  | -0.08 | 0.08  |
| 23607 | CD2AP    | 0.00  | 0.00  | 0.05  | 0.13  |
| 23608 | MKRN1    | 0.02  | 0.00  | 0.00  | 0.03  |
| 23609 | MKRN2    | 0.02  | 0.00  | 0.00  | 0.15  |
| 23612 | PHLDA3   | 0.07  | 0.00  | 0.05  | 0.18  |
| 23613 | PRKCBP1  | 0.05  | 0.00  | 0.03  | 0.38  |

|       |           |       |       |       |       |
|-------|-----------|-------|-------|-------|-------|
| 23616 | SH3BP1    | -0.04 | 0.00  | 0.03  | 0.13  |
| 23619 | ZIM2      | 0.02  | 0.09  | -0.03 | -0.07 |
| 23620 | NTSR2     | -0.02 | 0.00  | 0.00  | -0.02 |
| 23624 | CBLC      | -0.02 | 0.00  | -0.03 | 0.22  |
| 23630 | KCNE1L    | -0.05 | 0.00  | -0.08 | 0.13  |
| 23632 | CA14      | 0.07  | 0.09  | 0.14  | -0.09 |
| 23633 | KPNA6     | 0.02  | 0.09  | 0.00  | 0.31  |
| 23635 | SSBP2     | 0.00  | 0.09  | -0.14 | 0.15  |
| 23640 | HSPBP1    | 0.00  | 0.09  | -0.03 | 0.04  |
| 23641 | LDOC1     | -0.05 | 0.00  | -0.08 | -0.08 |
| 23645 | PPP1R15A  | 0.00  | 0.00  | -0.03 | 0.12  |
| 23649 | POLA2     | 0.02  | 0.00  | 0.03  | 0.19  |
| 23650 | TRIM29    | -0.07 | 0.00  | 0.00  | 0.18  |
| 23657 | SLC7A11   | -0.02 | 0.00  | -0.03 | 0.04  |
| 23658 | LSM5      | -0.02 | 0.09  | -0.03 | 0.42  |
| 23659 | LYPLA3    | -0.05 | 0.00  | 0.00  | 0.15  |
| 23660 | ZFP95     | 0.02  | 0.00  | 0.00  | 0.08  |
| 23670 | TMEM2     | -0.02 | 0.00  | -0.03 | 0.02  |
| 23673 | STX12     | -0.02 | 0.00  | 0.00  | 0.31  |
| 23676 | SMPX      | -0.05 | 0.00  | -0.11 | 0.07  |
| 23677 | SH3BP4    | 0.00  | 0.00  | 0.00  | NaN   |
| 23682 | RAB38     | -0.05 | 0.00  | 0.00  | 0.13  |
| 23705 | IGSF4     | -0.07 | 0.00  | 0.00  | 0.20  |
| 23708 | GSPT2     | -0.04 | 0.00  | -0.08 | 0.04  |
| 23710 | GABARAPL1 | 0.00  | -0.18 | 0.08  | 0.21  |
| 23729 | CARKL     | -0.04 | 0.00  | 0.00  | 0.28  |
| 23733 | C9orf3    | -0.02 | 0.00  | 0.00  | -0.04 |
| 23742 | C15orf2   | 0.00  | 0.09  | -0.08 | -0.03 |
| 23743 | BHMT2     | 0.00  | 0.09  | -0.14 | -0.15 |
| 23746 | AIPL1     | -0.05 | 0.00  | 0.00  | 0.08  |
| 23753 | SDF2L1    | 0.00  | 0.00  | 0.03  | 0.10  |
| 23759 | PPIL2     | 0.00  | 0.00  | 0.03  | 0.17  |
| 23761 | PISD      | 0.00  | 0.00  | 0.03  | -0.04 |
| 23762 | OSBP2     | 0.00  | 0.00  | 0.05  | 0.09  |
| 23764 | MAFF      | -0.04 | 0.00  | 0.03  | 0.23  |
| 23768 | FLRT2     | -0.04 | 0.00  | 0.00  | 0.01  |
| 23770 | FKBP8     | 0.02  | 0.00  | 0.00  | 0.14  |
| 23774 | BRD1      | -0.02 | 0.00  | -0.03 | 0.00  |
| 23780 | APOL2     | -0.02 | 0.00  | 0.03  | 0.08  |
| 23787 | MTCH1     | 0.02  | 0.00  | 0.08  | 0.20  |
| 23788 | MTCH2     | -0.02 | 0.00  | -0.03 | 0.43  |
| 24137 | KIF4A     | -0.04 | 0.00  | -0.08 | -0.14 |
| 24139 | EML2      | -0.02 | 0.00  | 0.00  | 0.12  |
| 24140 | FTSJ1     | -0.04 | 0.00  | -0.08 | 0.35  |
| 24141 | C20orf103 | 0.00  | 0.00  | -0.05 | 0.00  |
| 24144 | TIP39     | 0.02  | 0.00  | -0.03 | 0.35  |
| 24145 | PANX1     | -0.07 | 0.09  | -0.03 | 0.16  |



|       |             |       |       |       |       |
|-------|-------------|-------|-------|-------|-------|
| 24146 | CLDN15      | 0.02  | 0.00  | 0.00  | 0.08  |
| 24147 | FJX1        | 0.04  | 0.00  | -0.03 | 0.13  |
| 25764 | HYPK        | -0.04 | 0.00  | -0.14 | 0.18  |
| 25769 | SLC24A2     | -0.05 | 0.00  | -0.03 | 0.04  |
| 25788 | RAD54B      | 0.16  | 0.09  | 0.24  | 0.30  |
| 25792 | CIZ1        | 0.02  | 0.00  | 0.00  | 0.17  |
| 25793 | FBXO7       | -0.02 | 0.00  | 0.03  | 0.06  |
| 25796 | PGLS        | 0.02  | 0.00  | 0.00  | 0.27  |
| 25797 | QPCT        | 0.00  | 0.00  | 0.00  | NaN   |
| 25801 | GCA         | -0.02 | 0.00  | 0.03  | 0.08  |
| 25802 | LMOD1       | 0.11  | 0.00  | 0.05  | 0.05  |
| 25804 | LSM4        | 0.02  | 0.00  | 0.00  | 0.28  |
| 25806 | VAX2        | 0.02  | 0.00  | 0.00  | 0.00  |
| 25809 | TTLL1       | -0.02 | 0.00  | -0.03 | 0.24  |
| 25819 | CCRN4L      | 0.00  | 0.00  | 0.00  | NaN   |
| 25820 | ARIH1       | 0.00  | 0.00  | -0.05 | 0.09  |
| 25821 | MTO1        | 0.00  | 0.00  | -0.03 | 0.31  |
| 25822 | DNAJB5      | 0.00  | 0.00  | 0.00  | -0.05 |
| 25825 | BACE2       | 0.00  | 0.00  | 0.00  | 0.33  |
| 25827 | FBXL2       | 0.02  | 0.00  | -0.03 | 0.07  |
| 25828 | TXN2        | -0.02 | 0.00  | 0.03  | -0.05 |
| 25829 | C22orf5     | -0.04 | 0.00  | 0.00  | -0.01 |
| 25830 | SULT4A1     | -0.02 | 0.00  | -0.03 | -0.23 |
| 25837 | RAB26       | 0.04  | 0.09  | 0.00  | 0.20  |
| 25839 | COG4        | -0.09 | 0.00  | 0.03  | 0.12  |
| 25843 | PREI3       | 0.02  | 0.00  | 0.00  | 0.25  |
| 25849 | DKFZP564O08 | -0.02 | 0.00  | 0.00  | 0.13  |
| 25850 | ZNF345      | 0.02  | 0.09  | 0.03  | 0.23  |
| 25855 | BRMS1       | 0.07  | 0.00  | 0.03  | 0.39  |
| 25891 | DKFZP586H21 | 0.04  | 0.00  | -0.03 | 0.03  |
| 25913 | POT1        | 0.00  | 0.00  | -0.03 | 0.16  |
| 25920 | COBRA1      | 0.02  | 0.00  | 0.03  | 0.05  |
| 25932 | CLIC4       | 0.00  | 0.00  | 0.00  | NaN   |
| 25937 | TAZ         | 0.00  | 0.00  | -0.03 | 0.00  |
| 25939 | SAMHD1      | 0.02  | 0.00  | 0.00  | 0.10  |
| 25975 | EGFL6       | -0.05 | -0.09 | -0.14 | -0.07 |
| 25980 | C20orf4     | 0.04  | 0.00  | 0.00  | 0.24  |
| 25988 | MIZF        | -0.05 | 0.00  | 0.00  | -0.05 |
| 25998 | IBTK        | -0.02 | 0.00  | -0.05 | 0.29  |
| 26031 | OSBPL3      | 0.00  | 0.18  | 0.03  | 0.17  |
| 26039 | SS18L1      | 0.04  | 0.09  | 0.05  | 0.36  |
| 26040 | SETBP1      | 0.00  | -0.09 | -0.03 | -0.02 |
| 26047 | CNTNAP2     | 0.02  | 0.00  | 0.00  | 0.13  |
| 26051 | PPP1R16B    | 0.02  | 0.00  | 0.03  | -0.06 |
| 26058 | TNRC15      | 0.02  | 0.00  | 0.00  | -0.10 |
| 26060 | APPL        | -0.05 | 0.00  | -0.03 | 0.14  |
| 26063 | DECR2       | 0.05  | 0.18  | 0.05  | 0.19  |

|       |          |       |       |       |       |
|-------|----------|-------|-------|-------|-------|
| 26064 | RAI14    | 0.02  | 0.27  | 0.00  | 0.26  |
| 26085 | KLK13    | 0.00  | 0.00  | -0.03 | -0.16 |
| 26088 | GGA1     | -0.04 | 0.00  | 0.03  | 0.32  |
| 26108 | PYGO1    | -0.02 | 0.00  | -0.05 | 0.05  |
| 26118 | WSB1     | 0.00  | 0.09  | 0.00  | 0.39  |
| 26121 | PRPF31   | 0.00  | 0.09  | 0.00  | 0.65  |
| 26136 | TES      | 0.00  | 0.00  | -0.03 | 0.13  |
| 26152 | ZNF337   | 0.00  | 0.00  | -0.03 | 0.13  |
| 26154 | ABCA12   | 0.00  | 0.00  | 0.00  | NaN   |
| 26168 | SENP3    | -0.05 | 0.00  | 0.00  | 0.10  |
| 26190 | FBXW2    | -0.02 | 0.00  | 0.00  | 0.14  |
| 26191 | PTPN22   | 0.00  | 0.00  | -0.03 | -0.03 |
| 26205 | GMEB2    | 0.07  | 0.09  | 0.08  | 0.35  |
| 26206 | SPAG8    | 0.00  | 0.00  | 0.00  | 0.35  |
| 26227 | PHGDH    | 0.00  | 0.00  | 0.00  | 0.23  |
| 26228 | BRDG1    | -0.02 | 0.00  | 0.00  | 0.03  |
| 26229 | B3GAT3   | -0.02 | 0.00  | 0.03  | 0.12  |
| 26230 | TIAM2    | -0.02 | 0.00  | -0.05 | -0.18 |
| 26232 | FBXO2    | -0.02 | 0.00  | 0.00  | 0.04  |
| 26233 | FBXL6    | 0.16  | 0.00  | 0.35  | 0.26  |
| 26234 | FBXL5    | -0.04 | -0.09 | -0.05 | 0.08  |
| 26235 | FBXL4    | -0.02 | 0.00  | 0.00  | 0.08  |
| 26249 | KLHL3    | 0.00  | 0.00  | -0.03 | 0.15  |
| 26251 | KCNG2    | -0.02 | -0.09 | 0.00  | 0.03  |
| 26256 | CABYR    | 0.00  | -0.09 | 0.03  | 0.10  |
| 26261 | FBXO24   | 0.02  | 0.00  | 0.00  | 0.17  |
| 26263 | FBXO22   | 0.00  | 0.00  | -0.05 | 0.14  |
| 26266 | SLC13A4  | 0.02  | 0.00  | 0.03  | -0.15 |
| 26268 | FBXO9    | -0.02 | 0.00  | 0.08  | 0.23  |
| 26271 | FBXO5    | 0.00  | 0.00  | 0.00  | 0.25  |
| 26273 | FBXO3    | 0.04  | 0.00  | -0.05 | 0.28  |
| 26275 | HIBCH    | 0.00  | 0.00  | 0.00  | NaN   |
| 26276 | VPS33B   | 0.02  | 0.00  | 0.03  | 0.15  |
| 26277 | TINF2    | -0.02 | 0.00  | 0.00  | 0.04  |
| 26278 | SACS     | -0.07 | 0.00  | -0.11 | 0.09  |
| 26279 | PLA2G2D  | 0.00  | 0.00  | 0.00  | NaN   |
| 26280 | IL1RAPL2 | -0.05 | 0.00  | -0.08 | -0.10 |
| 26281 | FGF20    | -0.18 | -0.18 | -0.22 | 0.03  |
| 26284 | ERAL1    | 0.02  | 0.09  | 0.00  | 0.33  |
| 26285 | CLDN17   | 0.00  | 0.00  | 0.00  | 0.13  |
| 26286 | ARFGAP1  | 0.04  | 0.09  | 0.08  | -0.15 |
| 26287 | ANKRD2   | -0.02 | 0.00  | -0.03 | -0.01 |
| 26289 | AK5      | -0.02 | 0.00  | -0.03 | -0.07 |
| 26290 | GALNT8   | -0.02 | 0.09  | 0.08  | -0.11 |
| 26291 | FGF21    | 0.00  | 0.00  | -0.03 | -0.11 |
| 26292 | MYCBP    | 0.00  | 0.09  | 0.00  | 0.41  |
| 26298 | EHF      | 0.04  | 0.00  | 0.03  | 0.13  |

|       |          |       |      |       |       |
|-------|----------|-------|------|-------|-------|
| 26468 | LHX6     | -0.02 | 0.00 | 0.00  | 0.02  |
| 26469 | PTPN18   | -0.02 | 0.00 | 0.00  | 0.05  |
| 26472 | PPP1R14B | 0.02  | 0.09 | 0.05  | -0.02 |
| 26476 | OR10J1   | 0.04  | 0.00 | 0.16  | 0.02  |
| 26499 | PLEK2    | -0.02 | 0.00 | 0.00  | 0.16  |
| 26502 | NARF     | -0.02 | 0.09 | 0.08  | 0.10  |
| 26503 | SLC17A5  | 0.00  | 0.00 | -0.03 | 0.15  |
| 26504 | CNNM4    | 0.00  | 0.00 | 0.00  | NaN   |
| 26505 | CNNM3    | 0.00  | 0.00 | 0.00  | NaN   |
| 26507 | CNNM1    | -0.02 | 0.00 | -0.03 | -0.08 |
| 26508 | HEYL     | -0.02 | 0.09 | 0.00  | 0.03  |
| 26509 | FER1L3   | -0.02 | 0.00 | -0.05 | 0.13  |
| 26511 | CHIC2    | -0.02 | 0.00 | 0.00  | 0.18  |
| 26515 | FXC1     | -0.02 | 0.00 | -0.03 | 0.32  |
| 26517 | TIMM13   | 0.00  | 0.00 | 0.00  | NaN   |
| 26519 | TIMM10   | 0.02  | 0.00 | 0.05  | 0.38  |
| 26520 | TIMM9    | 0.00  | 0.00 | -0.03 | 0.18  |
| 26521 | TIMM8B   | -0.07 | 0.00 | 0.00  | 0.26  |
| 26523 | EIF2C1   | -0.02 | 0.00 | 0.00  | 0.14  |
| 26528 | DAZAP1   | 0.02  | 0.09 | -0.03 | -0.01 |
| 26529 | OR12D2   | 0.00  | 0.00 | 0.05  | -0.10 |
| 26531 | OR11A1   | 0.00  | 0.00 | 0.05  | -0.03 |
| 26539 | OR10H1   | 0.00  | 0.00 | 0.00  | NaN   |
| 26548 | ITGB1BP2 | -0.04 | 0.00 | -0.08 | 0.02  |
| 26575 | RGS17    | 0.00  | 0.00 | 0.00  | -0.10 |
| 26577 | PCOLCE2  | 0.02  | 0.00 | 0.03  | 0.16  |
| 26578 | OSTF1    | -0.02 | 0.00 | 0.00  | 0.10  |
| 26586 | CKAP2    | -0.07 | 0.00 | -0.08 | 0.12  |
| 26589 | MRPL46   | 0.00  | 0.00 | -0.05 | 0.22  |
| 26608 | TBL2     | 0.02  | 0.00 | 0.05  | 0.14  |
| 26658 | OR7C2    | 0.02  | 0.00 | 0.00  | -0.08 |
| 26692 | OR2W1    | 0.00  | 0.00 | 0.05  | 0.00  |
| 26747 | NUFIP1   | -0.05 | 0.00 | -0.11 | 0.06  |
| 26750 | RPS6KC1  | 0.07  | 0.00 | 0.00  | 0.33  |
| 26959 | HBP1     | 0.02  | 0.00 | -0.03 | 0.04  |
| 26960 | NBEA     | -0.05 | 0.00 | -0.11 | -0.02 |
| 26973 | CHORDC1  | -0.11 | 0.00 | 0.03  | 0.29  |
| 26984 | SEC22A   | 0.00  | 0.00 | -0.03 | -0.32 |
| 26986 | PABPC1   | 0.20  | 0.18 | 0.27  | 0.31  |
| 26994 | RNF11    | 0.00  | 0.00 | -0.03 | 0.05  |
| 26998 | FETUB    | 0.04  | 0.00 | 0.03  | 0.01  |
| 26999 | CYFIP2   | 0.00  | 0.00 | 0.00  | NaN   |
| 27004 | TCL6     | -0.02 | 0.00 | -0.03 | 0.12  |
| 27005 | USP21    | 0.11  | 0.00 | 0.14  | 0.34  |
| 27010 | TPK1     | 0.02  | 0.00 | 0.00  | 0.02  |
| 27019 | DNAI1    | 0.00  | 0.00 | 0.00  | 0.05  |
| 27023 | FOXB1    | -0.02 | 0.00 | -0.05 | 0.10  |

|       |          |       |       |       |       |
|-------|----------|-------|-------|-------|-------|
| 27030 | MLH3     | -0.02 | 0.00  | 0.00  | -0.01 |
| 27032 | ATP2C1   | 0.00  | 0.00  | -0.03 | 0.49  |
| 27034 | ACAD8    | -0.07 | 0.00  | -0.05 | 0.13  |
| 27035 | NOX1     | -0.05 | 0.00  | -0.08 | -0.01 |
| 27036 | SIGLEC7  | 0.00  | 0.00  | -0.03 | -0.09 |
| 27037 | HTF9C    | -0.02 | 0.00  | 0.08  | -0.14 |
| 27039 | PKD2L2   | 0.00  | 0.00  | -0.03 | -0.03 |
| 27040 | LAT      | 0.05  | 0.00  | 0.00  | 0.09  |
| 27043 | PELP1    | -0.04 | 0.00  | 0.00  | 0.16  |
| 27065 | D4S234E  | -0.02 | 0.00  | 0.00  | 0.07  |
| 27067 | STAU2    | 0.11  | 0.09  | 0.08  | 0.25  |
| 27069 | GHITM    | -0.02 | 0.00  | -0.05 | 0.21  |
| 27071 | DAPP1    | -0.02 | 0.00  | 0.03  | 0.17  |
| 27072 | VPS41    | -0.02 | 0.00  | -0.03 | 0.16  |
| 27074 | LAMP3    | 0.04  | 0.00  | 0.00  | -0.02 |
| 27087 | B3GAT1   | -0.07 | 0.00  | -0.05 | 0.10  |
| 27091 | CACNG5   | 0.13  | 0.27  | 0.03  | -0.08 |
| 27094 | KCNMB3   | 0.04  | 0.00  | 0.03  | 0.16  |
| 27097 | TAF5L    | 0.07  | 0.00  | 0.03  | 0.20  |
| 27098 | CLUL1    | 0.02  | -0.09 | 0.00  | 0.01  |
| 27113 | BBC3     | -0.04 | 0.00  | -0.03 | -0.08 |
| 27115 | PDE7B    | -0.02 | 0.00  | 0.03  | 0.04  |
| 27121 | DKK4     | 0.02  | 0.09  | 0.11  | 0.15  |
| 27122 | DKK3     | 0.00  | 0.00  | -0.05 | 0.04  |
| 27123 | DKK2     | -0.02 | 0.00  | 0.00  | -0.02 |
| 27124 | PIB5PA   | 0.00  | 0.00  | 0.05  | 0.07  |
| 27128 | PSCD4    | -0.04 | 0.00  | 0.03  | 0.29  |
| 27129 | HSPB7    | 0.02  | 0.09  | 0.00  | -0.03 |
| 27130 | INVS     | -0.02 | 0.00  | 0.00  | -0.05 |
| 27131 | SNX5     | 0.00  | 0.00  | -0.08 | 0.13  |
| 27132 | CPNE7    | -0.04 | 0.00  | 0.03  | -0.07 |
| 27134 | TJP3     | 0.00  | 0.00  | 0.00  | NaN   |
| 27141 | CIDEB    | 0.00  | 0.00  | 0.00  | 0.11  |
| 27156 | RTDR1    | -0.02 | 0.00  | 0.03  | 0.17  |
| 27173 | SLC39A1  | 0.05  | 0.00  | 0.14  | 0.10  |
| 27175 | TUBG2    | -0.04 | 0.00  | 0.00  | 0.11  |
| 27180 | SIGLEC9  | 0.00  | 0.00  | -0.03 | -0.04 |
| 27181 | SIGLEC8  | 0.00  | 0.00  | -0.03 | 0.02  |
| 27183 | VPS4A    | -0.09 | 0.00  | 0.03  | 0.11  |
| 27185 | DISC1    | 0.09  | 0.00  | 0.03  | -0.06 |
| 27190 | IL17B    | 0.00  | 0.00  | 0.00  | NaN   |
| 27229 | 76P      | -0.04 | 0.00  | -0.14 | 0.10  |
| 27230 | SERP1    | 0.02  | 0.00  | 0.03  | 0.09  |
| 27232 | GNMT     | 0.00  | 0.00  | 0.08  | -0.14 |
| 27233 | SULT1C2  | 0.00  | 0.00  | 0.00  | NaN   |
| 27237 | ARHGEF16 | 0.05  | -0.09 | 0.08  | 0.01  |
| 27242 | TNFRSF21 | 0.00  | 0.00  | 0.05  | 0.26  |

|       |          |       |       |       |       |
|-------|----------|-------|-------|-------|-------|
| 27246 | ZNF364   | 0.05  | 0.00  | 0.11  | 0.32  |
| 27250 | PDCD4    | -0.04 | 0.00  | 0.00  | 0.22  |
| 27253 | PCDH17   | -0.07 | 0.00  | -0.08 | -0.01 |
| 27255 | CNTN6    | -0.02 | 0.00  | 0.00  | -0.05 |
| 27257 | LSM1     | 0.16  | 0.09  | 0.14  | 0.59  |
| 27258 | LSM3     | 0.02  | 0.00  | 0.00  | 0.28  |
| 27284 | SULT1B1  | -0.02 | 0.00  | 0.00  | 0.10  |
| 27285 | TEKT2    | -0.02 | 0.00  | 0.00  | 0.07  |
| 27288 | HNRNPG-T | -0.02 | 0.00  | -0.05 | 0.01  |
| 27290 | SPINK4   | -0.02 | 0.09  | 0.00  | 0.17  |
| 27296 | C20orf10 | 0.04  | 0.09  | 0.03  | 0.07  |
| 27299 | ADAMDEC1 | -0.13 | -0.18 | -0.19 | 0.09  |
| 27302 | BMP10    | 0.00  | 0.00  | 0.00  | NaN   |
| 27303 | RBMS3    | -0.02 | 0.00  | -0.05 | 0.00  |
| 27304 | MOCS3    | 0.07  | 0.09  | 0.05  | 0.24  |
| 27306 | PGDS     | -0.04 | 0.00  | -0.03 | 0.35  |
| 27314 | RAB30    | 0.00  | 0.00  | 0.00  | 0.24  |
| 27315 | FRAG1    | -0.02 | 0.00  | -0.03 | 0.03  |
| 27316 | RBMX     | -0.02 | 0.00  | -0.08 | 0.06  |
| 27330 | RPS6KA6  | -0.04 | 0.00  | -0.08 | 0.21  |
| 27333 | GOLPH4   | 0.02  | 0.00  | 0.03  | 0.16  |
| 27336 | HTATSF1  | -0.02 | 0.00  | -0.08 | 0.28  |
| 27343 | POLL     | -0.02 | 0.00  | -0.03 | 0.19  |
| 27344 | PCSK1N   | -0.04 | 0.00  | -0.05 | -0.07 |
| 27345 | KCNMB4   | 0.02  | 0.00  | 0.03  | 0.06  |
| 27347 | STK39    | 0.00  | 0.00  | 0.03  | 0.05  |
| 27430 | MAT2B    | 0.00  | 0.00  | -0.03 | 0.24  |
| 27434 | POLM     | -0.02 | 0.00  | 0.05  | 0.04  |
| 27436 | EML4     | 0.00  | 0.00  | 0.00  | NaN   |
| 27440 | CECR5    | -0.04 | 0.00  | 0.00  | 0.09  |
| 28316 | CDH20    | -0.02 | -0.09 | 0.03  | 0.06  |
| 28513 | CDH19    | 0.00  | -0.09 | 0.00  | 0.19  |
| 28957 | MRPS28   | 0.13  | 0.09  | 0.14  | 0.13  |
| 28964 | GIT1     | 0.04  | 0.18  | 0.00  | 0.23  |
| 28973 | MRPS18B  | 0.00  | 0.00  | 0.05  | 0.15  |
| 28977 | MRPL42   | 0.00  | 0.09  | 0.00  | 0.15  |
| 28984 | RGC32    | -0.05 | 0.00  | -0.05 | 0.14  |
| 28986 | MAGEH1   | -0.04 | 0.00  | -0.05 | 0.13  |
| 28992 | LRP16    | 0.00  | 0.00  | 0.03  | 0.04  |
| 28996 | HIPK2    | 0.02  | 0.00  | 0.00  | -0.03 |
| 28998 | MRPL13   | 0.18  | 0.09  | 0.35  | 0.30  |
| 28999 | KLF15    | 0.00  | 0.00  | -0.03 | -0.14 |
| 29058 | C20orf30 | 0.02  | 0.00  | -0.05 | 0.07  |
| 29062 | HSPC049  | 0.02  | 0.00  | 0.03  | 0.08  |
| 29074 | MRPL18   | -0.02 | 0.00  | -0.05 | 0.24  |
| 29086 | HSPC142  | 0.04  | 0.00  | 0.00  | 0.32  |
| 29088 | MRPL15   | 0.11  | 0.00  | 0.14  | 0.28  |

|       |         |       |       |       |       |
|-------|---------|-------|-------|-------|-------|
| 29093 | MRPL22  | 0.00  | 0.00  | 0.00  | NaN   |
| 29094 | HSPC159 | 0.00  | 0.00  | 0.00  | NaN   |
| 29104 | N6AMT1  | -0.02 | 0.00  | 0.05  | -0.10 |
| 29106 | SCG3    | -0.02 | 0.00  | -0.05 | 0.15  |
| 29107 | NXT1    | 0.02  | 0.00  | -0.03 | 0.16  |
| 29109 | FHOD1   | -0.04 | 0.00  | 0.00  | 0.00  |
| 29110 | TBK1    | 0.00  | 0.00  | 0.00  | NaN   |
| 29117 | BRD7    | -0.09 | 0.00  | -0.03 | 0.25  |
| 29122 | TSP50   | -0.04 | 0.00  | 0.00  | 0.05  |
| 29127 | RACGAP1 | 0.02  | 0.00  | -0.03 | 0.26  |
| 29760 | BLNK    | -0.02 | 0.00  | -0.05 | 0.22  |
| 29761 | USP25   | -0.05 | -0.09 | 0.05  | 0.46  |
| 29763 | PACSIN3 | -0.02 | 0.00  | -0.03 | 0.06  |
| 29766 | TMOD3   | -0.02 | 0.00  | -0.05 | 0.09  |
| 29767 | TMOD2   | -0.02 | 0.00  | -0.05 | 0.23  |
| 29775 | CARD10  | -0.04 | 0.00  | 0.03  | 0.08  |
| 29777 | ABT1    | 0.00  | 0.00  | 0.03  | 0.09  |
| 29780 | PARVB   | -0.02 | 0.00  | -0.03 | 0.30  |
| 29802 | VPREB3  | -0.02 | 0.00  | 0.03  | -0.07 |
| 29844 | TFPT    | 0.00  | 0.09  | 0.00  | 0.31  |
| 29851 | ICOS    | 0.00  | 0.00  | 0.00  | NaN   |
| 29855 | UBN1    | 0.04  | 0.00  | 0.00  | 0.10  |
| 29880 | ALG5    | -0.05 | 0.00  | -0.11 | 0.29  |
| 29881 | NPC1L1  | -0.02 | 0.00  | 0.05  | 0.05  |
| 29882 | APC2    | 0.00  | 0.00  | -0.03 | 0.20  |
| 29883 | CNOT7   | -0.18 | -0.18 | -0.22 | 0.34  |
| 29887 | SNX10   | 0.00  | 0.18  | 0.03  | -0.03 |
| 29894 | CPSF1   | 0.15  | 0.00  | 0.30  | 0.27  |
| 29907 | SNX15   | 0.02  | 0.00  | 0.03  | 0.20  |
| 29911 | HOOK2   | 0.02  | -0.09 | 0.00  | 0.13  |
| 29916 | SNX11   | 0.04  | 0.18  | 0.00  | 0.47  |
| 29922 | NME7    | 0.02  | 0.00  | 0.05  | 0.26  |
| 29923 | HIG2    | 0.02  | 0.00  | 0.00  | 0.07  |
| 29925 | GMPPB   | 0.00  | 0.00  | 0.00  | NaN   |
| 29926 | GMPPA   | 0.00  | 0.00  | 0.00  | NaN   |
| 29927 | SEC61A1 | 0.00  | 0.00  | -0.03 | 0.39  |
| 29928 | TIMM22  | -0.05 | 0.00  | 0.00  | 0.02  |
| 29929 | ALG6    | -0.02 | 0.00  | 0.00  | 0.21  |
| 29930 | PCDHB1  | 0.00  | 0.00  | 0.00  | NaN   |
| 29942 | PURG    | -0.11 | -0.18 | -0.19 | -0.04 |
| 29943 | PADI1   | 0.00  | 0.00  | 0.00  | NaN   |
| 29947 | DNMT3L  | 0.00  | 0.00  | 0.00  | -0.02 |
| 29949 | IL19    | 0.09  | 0.00  | 0.00  | 0.05  |
| 29953 | TRHDE   | 0.04  | 0.00  | 0.03  | -0.02 |
| 29954 | POMT2   | -0.02 | 0.00  | -0.03 | -0.03 |
| 29956 | LASS2   | 0.07  | 0.09  | 0.16  | 0.10  |
| 29960 | FTSJ2   | 0.00  | 0.00  | 0.05  | 0.21  |

|       |          |       |       |       |       |
|-------|----------|-------|-------|-------|-------|
| 29965 | C16orf5  | 0.04  | 0.00  | 0.00  | 0.06  |
| 29970 | SCHIP1   | 0.02  | 0.00  | 0.03  | 0.20  |
| 29974 | ACF      | -0.02 | 0.00  | -0.03 | -0.01 |
| 29980 | DONSON   | 0.00  | 0.00  | 0.00  | 0.01  |
| 29986 | SLC39A2  | -0.02 | 0.00  | 0.00  | 0.14  |
| 29988 | SLC2A8   | -0.02 | 0.00  | 0.00  | 0.01  |
| 29994 | BAZ2B    | -0.02 | 0.00  | 0.03  | 0.15  |
| 29995 | LMCD1    | 0.00  | 0.00  | 0.00  | 0.14  |
| 29997 | GLTSCR2  | -0.02 | 0.00  | 0.00  | 0.47  |
| 29998 | GLTSCR1  | -0.04 | 0.00  | 0.00  | 0.00  |
| 29999 | FSCN3    | 0.02  | 0.00  | -0.03 | 0.00  |
| 30001 | ERO1L    | 0.02  | 0.00  | 0.00  | 0.31  |
| 30008 | EFEMP2   | 0.02  | 0.00  | 0.03  | 0.09  |
| 30009 | TBX21    | 0.02  | 0.18  | 0.00  | 0.02  |
| 30013 | S100A14  | 0.07  | 0.00  | 0.16  | 0.20  |
| 30811 | HUNK     | 0.00  | 0.00  | -0.03 | -0.04 |
| 30813 | VSX1     | 0.02  | 0.00  | -0.03 | -0.19 |
| 30814 | PLA2G2E  | 0.00  | 0.00  | 0.00  | NaN   |
| 30817 | EMR2     | 0.02  | 0.00  | 0.00  | -0.09 |
| 30819 | KCNIP2   | 0.00  | 0.00  | -0.03 | -0.08 |
| 30820 | KCNIP1   | 0.00  | 0.00  | -0.03 | 0.00  |
| 30835 | CD209    | 0.00  | -0.09 | 0.00  | -0.05 |
| 30844 | EHD4     | -0.04 | 0.09  | -0.14 | 0.40  |
| 30845 | EHD3     | 0.00  | 0.00  | 0.00  | NaN   |
| 30846 | EHD2     | -0.04 | 0.00  | 0.00  | 0.17  |
| 30849 | PIK3R4   | 0.00  | 0.00  | -0.03 | 0.27  |
| 43847 | KLK14    | 0.00  | 0.00  | -0.03 | -0.05 |
| 49856 | WDR8     | -0.02 | 0.00  | 0.00  | 0.00  |
| 50485 | SMARCAL1 | 0.02  | 0.00  | 0.00  | 0.10  |
| 50486 | GOS2     | 0.07  | 0.00  | 0.00  | 0.03  |
| 50487 | PLA2G3   | 0.00  | 0.00  | 0.05  | 0.18  |
| 50506 | DUOX2    | -0.04 | 0.00  | -0.11 | 0.16  |
| 50507 | NOX4     | -0.05 | 0.00  | 0.03  | 0.11  |
| 50508 | NOX3     | -0.02 | 0.00  | -0.03 | 0.03  |
| 50509 | COL5A3   | 0.00  | 0.00  | 0.00  | NaN   |
| 50613 | UBQLN3   | -0.02 | 0.00  | -0.03 | 0.01  |
| 50615 | IL21R    | 0.02  | 0.00  | 0.00  | -0.02 |
| 50616 | IL22     | 0.02  | 0.00  | 0.00  | 0.09  |
| 50617 | ATP6V0A4 | 0.02  | 0.00  | 0.03  | 0.22  |
| 50618 | ITSN2    | -0.02 | 0.00  | 0.00  | 0.10  |
| 50619 | DEF6     | 0.00  | 0.00  | 0.05  | 0.11  |
| 50626 | CYHR1    | 0.15  | 0.00  | 0.30  | 0.10  |
| 50649 | ARHGEF4  | 0.00  | 0.00  | 0.00  | NaN   |
| 50650 | ARHGEF3  | -0.05 | 0.00  | -0.03 | 0.10  |
| 50674 | NEUROG3  | -0.02 | 0.00  | 0.03  | 0.03  |
| 50700 | RDH8     | 0.00  | 0.00  | 0.00  | NaN   |
| 50805 | IRX4     | 0.02  | 0.18  | 0.00  | 0.11  |

|       |           |       |       |       |       |
|-------|-----------|-------|-------|-------|-------|
| 50807 | DDEF1     | 0.20  | 0.09  | 0.38  | 0.10  |
| 50813 | COPS7A    | -0.02 | 0.09  | 0.05  | 0.40  |
| 50831 | TAS2R3    | 0.02  | 0.00  | 0.00  | -0.11 |
| 50832 | TAS2R4    | 0.02  | 0.00  | 0.00  | 0.12  |
| 50833 | TAS2R16   | 0.00  | 0.00  | -0.03 | -0.02 |
| 50834 | TAS2R1    | 0.02  | 0.18  | 0.00  | -0.18 |
| 50835 | TAS2R9    | 0.00  | -0.18 | 0.08  | -0.01 |
| 50836 | TAS2R8    | 0.00  | -0.18 | 0.08  | 0.08  |
| 50837 | TAS2R7    | 0.00  | -0.18 | 0.08  | -0.09 |
| 50838 | TAS2R13   | 0.00  | -0.18 | 0.08  | 0.18  |
| 50839 | TAS2R10   | 0.00  | -0.18 | 0.08  | 0.08  |
| 50840 | TAS2R14   | 0.00  | -0.18 | 0.11  | 0.00  |
| 50853 | VILL      | 0.00  | 0.00  | 0.00  | -0.15 |
| 50855 | PARD6A    | -0.04 | 0.00  | 0.00  | 0.12  |
| 50861 | STMN3     | 0.07  | 0.09  | 0.08  | 0.04  |
| 50863 | HNT       | -0.07 | 0.00  | -0.05 | -0.01 |
| 50865 | HEBP1     | 0.00  | -0.09 | 0.05  | 0.08  |
| 50937 | CDON      | -0.05 | 0.00  | -0.03 | 0.02  |
| 50939 | IMPG2     | 0.00  | 0.00  | -0.03 | -0.16 |
| 50940 | PDE11A    | 0.00  | 0.00  | 0.00  | NaN   |
| 50944 | SHANK1    | 0.00  | 0.00  | -0.03 | -0.12 |
| 51012 | C20orf45  | 0.05  | 0.09  | 0.03  | 0.27  |
| 51021 | MRPS16    | -0.02 | 0.00  | 0.00  | 0.12  |
| 51022 | GLRX2     | 0.07  | 0.00  | 0.03  | 0.25  |
| 51023 | MRPS18C   | -0.04 | 0.00  | -0.03 | 0.05  |
| 51025 | Magmas    | 0.04  | 0.00  | 0.00  | 0.22  |
| 51050 | PI15      | 0.09  | 0.00  | 0.08  | -0.05 |
| 51056 | LAP3      | -0.04 | -0.09 | -0.05 | 0.12  |
| 51065 | RPS27L    | 0.02  | 0.00  | -0.05 | 0.14  |
| 51069 | MRPL2     | 0.00  | 0.00  | 0.08  | 0.15  |
| 51070 | NOSIP     | 0.02  | 0.00  | -0.03 | 0.46  |
| 51073 | MRPL4     | 0.00  | 0.00  | 0.00  | NaN   |
| 51081 | MRPS7     | 0.04  | 0.18  | 0.05  | 0.44  |
| 51084 | CRYL1     | -0.07 | 0.00  | -0.08 | 0.02  |
| 51100 | SH3GLB1   | -0.02 | 0.00  | -0.03 | 0.13  |
| 51106 | TFB1M     | -0.02 | 0.00  | -0.03 | 0.12  |
| 51116 | MRPS2     | 0.02  | 0.00  | 0.03  | 0.03  |
| 51117 | COQ4      | 0.02  | 0.00  | 0.00  | 0.12  |
| 51121 | RPL26L1   | 0.00  | 0.00  | -0.03 | 0.00  |
| 51127 | TRIM17    | 0.09  | 0.09  | 0.03  | 0.26  |
| 51129 | ANGPTL4   | 0.00  | -0.09 | 0.00  | -0.13 |
| 51135 | IRAK4     | 0.00  | 0.00  | 0.03  | 0.09  |
| 51138 | COPS4     | -0.04 | 0.00  | -0.03 | 0.17  |
| 51144 | HSD17B12  | -0.02 | 0.00  | -0.08 | 0.15  |
| 51147 | ING4      | -0.02 | 0.09  | 0.05  | 0.35  |
| 51155 | HN1       | 0.05  | 0.18  | 0.05  | 0.33  |
| 51156 | SERPINA10 | -0.02 | 0.00  | 0.00  | -0.08 |



|       |          |       |       |       |       |
|-------|----------|-------|-------|-------|-------|
| 51160 | VPS28    | 0.15  | 0.00  | 0.30  | 0.27  |
| 51163 | DBR1     | 0.02  | 0.00  | 0.00  | 0.15  |
| 51164 | DCTN4    | 0.00  | 0.00  | 0.00  | NaN   |
| 51168 | MYO15A   | -0.05 | 0.00  | 0.00  | 0.17  |
| 51176 | LEF1     | -0.02 | 0.00  | 0.00  | -0.02 |
| 51179 | HAO2     | 0.00  | 0.00  | 0.00  | -0.06 |
| 51187 | C15orf15 | -0.02 | 0.00  | -0.05 | 0.14  |
| 51188 | SS18L2   | -0.04 | 0.00  | 0.00  | 0.09  |
| 51196 | PLCE1    | -0.02 | 0.00  | -0.05 | -0.04 |
| 51199 | NIN      | 0.02  | 0.00  | 0.00  | 0.10  |
| 51200 | CPA4     | 0.02  | 0.00  | 0.00  | 0.16  |
| 51206 | GP6      | 0.00  | 0.09  | -0.03 | -0.16 |
| 51208 | CLDN18   | 0.02  | 0.00  | 0.00  | 0.02  |
| 51222 | ZNF219   | -0.02 | 0.00  | 0.00  | -0.09 |
| 51232 | CRIM1    | 0.00  | 0.00  | 0.00  | NaN   |
| 51268 | PIPOX    | 0.02  | 0.18  | 0.00  | 0.21  |
| 51274 | KLF3     | -0.05 | 0.00  | -0.03 | 0.24  |
| 51278 | IER5     | 0.04  | 0.00  | 0.03  | 0.29  |
| 51280 | GOLPH2   | -0.02 | 0.00  | 0.00  | -0.05 |
| 51282 | SCAND1   | 0.04  | 0.00  | 0.03  | 0.39  |
| 51284 | TLR7     | -0.05 | -0.09 | -0.14 | 0.17  |
| 51294 | PCDH12   | 0.00  | 0.00  | 0.00  | NaN   |
| 51297 | PLUNC    | 0.00  | 0.00  | 0.00  | NaN   |
| 51298 | THEG     | 0.00  | 0.00  | -0.03 | -0.04 |
| 51302 | CYP39A1  | 0.00  | 0.00  | 0.05  | 0.19  |
| 51304 | ZDHHC3   | -0.04 | 0.00  | 0.00  | 0.17  |
| 51306 | C5orf5   | 0.00  | 0.00  | -0.03 | 0.12  |
| 51311 | TLR8     | -0.05 | -0.09 | -0.14 | -0.06 |
| 51318 | MRPL35   | 0.00  | 0.00  | 0.00  | NaN   |
| 51322 | WAC      | -0.02 | 0.00  | 0.03  | 0.23  |
| 51327 | ERAF     | 0.04  | 0.09  | 0.03  | -0.14 |
| 51332 | SPTBN5   | -0.04 | 0.09  | -0.14 | 0.01  |
| 51338 | MS4A4A   | -0.04 | 0.00  | 0.03  | 0.24  |
| 51340 | CRNKL1   | 0.00  | 0.00  | -0.08 | 0.34  |
| 51343 | FZR1     | 0.00  | 0.00  | 0.00  | NaN   |
| 51348 | KLRF1    | 0.00  | -0.18 | 0.05  | 0.12  |
| 51360 | MBTPS2   | -0.05 | 0.00  | -0.11 | -0.01 |
| 51361 | HOOK1    | 0.00  | 0.00  | 0.00  | 0.17  |
| 51367 | POP5     | 0.02  | 0.00  | 0.00  | 0.06  |
| 51373 | MRPS17   | 0.00  | 0.00  | 0.05  | 0.59  |
| 51375 | SNX7     | -0.02 | 0.00  | -0.03 | 0.09  |
| 51378 | ANGPT4   | 0.02  | 0.00  | -0.03 | -0.05 |
| 51379 | CRLF3    | 0.00  | 0.00  | 0.00  | 0.23  |
| 51380 | CSAD     | 0.02  | 0.00  | -0.03 | 0.09  |
| 51382 | ATP6V1D  | -0.02 | 0.00  | 0.00  | 0.14  |
| 51384 | WNT16    | 0.00  | 0.00  | -0.03 | -0.08 |
| 51386 | EIF3S6IP | -0.04 | 0.00  | 0.03  | -0.06 |

|       |           |       |       |       |       |
|-------|-----------|-------|-------|-------|-------|
| 51411 | BIN2      | 0.02  | 0.00  | -0.03 | -0.17 |
| 51421 | AMOTL2    | 0.00  | 0.00  | 0.00  | NaN   |
| 51422 | PRKAG2    | 0.02  | 0.00  | 0.00  | 0.09  |
| 51430 | C1orf9    | 0.02  | 0.00  | 0.05  | 0.27  |
| 51433 | ANAPC5    | 0.02  | 0.00  | 0.00  | 0.30  |
| 51438 | MAGEE1    | -0.04 | 0.00  | -0.08 | -0.15 |
| 51439 | FAM8A1    | 0.00  | 0.00  | 0.05  | 0.19  |
| 51440 | HPCAL4    | -0.02 | 0.09  | 0.00  | 0.11  |
| 51447 | IHPK2     | -0.04 | 0.00  | 0.00  | 0.05  |
| 51458 | RHCG      | 0.02  | 0.00  | -0.05 | -0.01 |
| 51475 | CABP2     | 0.07  | 0.09  | 0.03  | 0.06  |
| 51478 | HSD17B7   | 0.05  | 0.00  | 0.14  | 0.25  |
| 51491 | HSPC111   | 0.00  | 0.00  | -0.03 | 0.06  |
| 51497 | TH1L      | 0.05  | 0.09  | 0.03  | 0.49  |
| 51507 | C20orf43  | 0.04  | 0.00  | 0.05  | 0.41  |
| 51512 | GTSE1     | -0.02 | 0.00  | -0.03 | 0.01  |
| 51526 | C20orf111 | 0.02  | 0.09  | 0.03  | 0.27  |
| 51540 | SCLY      | 0.02  | 0.00  | 0.00  | 0.06  |
| 51547 | SIRT7     | 0.00  | 0.09  | 0.08  | -0.01 |
| 51548 | SIRT6     | 0.00  | 0.00  | 0.00  | NaN   |
| 51550 | CINP      | 0.00  | 0.00  | -0.03 | 0.17  |
| 51552 | RAB14     | -0.02 | 0.00  | 0.00  | 0.06  |
| 51560 | RAB6B     | 0.00  | 0.00  | 0.00  | NaN   |
| 51561 | IL23A     | 0.00  | 0.00  | 0.00  | NaN   |
| 51562 | MBIP      | 0.02  | 0.09  | 0.00  | 0.11  |
| 51564 | HDAC7A    | 0.00  | 0.00  | 0.00  | NaN   |
| 51573 | MIR16     | 0.02  | -0.09 | 0.00  | 0.11  |
| 51585 | PCF11     | 0.00  | 0.00  | 0.00  | -0.08 |
| 51586 | PCQAP     | -0.02 | 0.00  | 0.05  | -0.21 |
| 51592 | TRIM33    | 0.00  | 0.00  | -0.03 | 0.07  |
| 51593 | ARS2      | 0.02  | 0.00  | 0.00  | 0.25  |
| 51594 | NAG       | -0.02 | 0.00  | 0.00  | 0.11  |
| 51606 | ATP6V1H   | 0.13  | 0.00  | 0.14  | 0.10  |
| 51621 | KLF13     | -0.04 | 0.00  | -0.14 | 0.20  |
| 51642 | MRPL48    | 0.05  | 0.09  | -0.03 | 0.35  |
| 51650 | MRPS33    | 0.02  | 0.00  | 0.00  | 0.04  |
| 51663 | ZFR       | 0.02  | 0.18  | 0.00  | 0.29  |
| 51666 | ASB4      | 0.02  | 0.00  | -0.03 | 0.07  |
| 51678 | MPP6      | 0.00  | 0.18  | 0.03  | 0.17  |
| 51701 | NLK       | 0.04  | 0.18  | 0.00  | 0.05  |
| 51702 | PADI3     | 0.00  | 0.00  | 0.00  | NaN   |
| 51704 | GPRC5B    | 0.02  | -0.09 | 0.00  | 0.22  |
| 51715 | RAB23     | -0.04 | 0.00  | 0.08  | 0.25  |
| 51728 | POLR3K    | 0.05  | 0.09  | 0.00  | 0.24  |
| 51729 | WBP11     | 0.00  | -0.09 | 0.05  | 0.09  |
| 51733 | UPB1      | 0.00  | 0.00  | 0.03  | 0.15  |
| 51734 | SEPX1     | 0.04  | 0.18  | 0.00  | 0.10  |

|       |          |       |       |       |       |
|-------|----------|-------|-------|-------|-------|
| 51741 | WVOX     | -0.09 | 0.00  | 0.00  | 0.15  |
| 51744 | CD244    | 0.07  | 0.00  | 0.14  | -0.05 |
| 51752 | ARTS-1   | 0.00  | 0.00  | -0.14 | 0.11  |
| 51761 | ATP8A2   | -0.05 | 0.00  | -0.08 | -0.08 |
| 51763 | SKIP     | -0.05 | 0.00  | 0.00  | 0.35  |
| 51765 | MST4     | -0.04 | 0.00  | -0.08 | 0.08  |
| 51768 | TM7SF3   | 0.00  | -0.09 | 0.05  | 0.05  |
| 51776 | ZAK      | -0.02 | 0.00  | 0.00  | -0.08 |
| 51778 | MYOZ2    | 0.00  | 0.00  | -0.03 | 0.07  |
| 51807 | TUBA8    | -0.02 | 0.00  | 0.00  | -0.08 |
| 51809 | GALNT7   | -0.02 | 0.00  | -0.05 | 0.13  |
| 51816 | CECR1    | -0.04 | 0.00  | 0.00  | 0.08  |
| 53335 | BCL11A   | 0.00  | 0.00  | 0.00  | NaN   |
| 53339 | BTBD1    | 0.00  | 0.00  | -0.03 | 0.03  |
| 53340 | SPA17    | -0.05 | 0.00  | -0.03 | -0.05 |
| 53343 | NUDT9    | -0.04 | 0.00  | -0.03 | 0.14  |
| 53346 | TM6SF1   | 0.00  | 0.00  | -0.03 | -0.04 |
| 53347 | UBASH3A  | 0.00  | 0.00  | 0.00  | 0.02  |
| 53353 | LRP1B    | 0.00  | 0.00  | 0.00  | NaN   |
| 53358 | SHC3     | -0.02 | 0.00  | 0.00  | -0.06 |
| 53371 | NUP54    | -0.02 | 0.00  | 0.00  | 0.06  |
| 53405 | CLIC5    | 0.00  | 0.00  | 0.05  | -0.08 |
| 53407 | STX18    | -0.02 | 0.00  | 0.00  | 0.28  |
| 53615 | MBD3     | 0.00  | 0.00  | -0.03 | 0.14  |
| 53616 | ADAM22   | 0.02  | 0.00  | 0.00  | 0.21  |
| 53635 | PTOV1    | 0.02  | 0.00  | -0.03 | 0.20  |
| 53637 | EDG8     | 0.02  | 0.00  | 0.00  | 0.16  |
| 53820 | DSCR6    | 0.00  | 0.00  | 0.00  | -0.03 |
| 53822 | FXYD7    | 0.00  | 0.00  | 0.08  | 0.25  |
| 53826 | FXYD6    | -0.05 | 0.00  | 0.00  | 0.24  |
| 53827 | FXYD5    | 0.00  | 0.00  | 0.08  | 0.09  |
| 53832 | IL20RA   | -0.02 | 0.00  | 0.05  | 0.08  |
| 53838 | C11orf24 | 0.07  | 0.09  | 0.03  | 0.32  |
| 53841 | MUCDHL   | 0.02  | 0.00  | 0.00  | 0.05  |
| 53904 | MYO3A    | -0.02 | 0.00  | 0.00  | -0.18 |
| 53905 | DUOX1    | -0.04 | 0.00  | -0.11 | 0.12  |
| 53916 | RAB4B    | 0.00  | 0.00  | 0.00  | 0.22  |
| 53918 | PELO     | 0.00  | 0.00  | -0.08 | 0.21  |
| 53942 | CNTN5    | -0.04 | -0.09 | 0.00  | -0.02 |
| 53944 | CSNK1G1  | 0.00  | 0.09  | -0.08 | 0.23  |
| 53947 | A4GALT   | 0.00  | 0.00  | -0.03 | -0.25 |
| 54020 | SLC37A1  | 0.00  | 0.00  | 0.00  | 0.12  |
| 54039 | PCBP3    | 0.00  | 0.09  | 0.00  | 0.15  |
| 54069 | C21orf45 | 0.00  | 0.00  | -0.03 | 0.09  |
| 54107 | POLE3    | -0.02 | 0.00  | 0.00  | 0.14  |
| 54112 | GPR88    | -0.02 | 0.00  | -0.03 | -0.07 |
| 54148 | MRPL39   | 0.00  | 0.00  | 0.03  | 0.20  |

|       |          |       |       |       |       |
|-------|----------|-------|-------|-------|-------|
| 54149 | C21orf91 | -0.04 | -0.18 | 0.05  | 0.26  |
| 54207 | KCNK10   | -0.04 | 0.00  | 0.00  | 0.05  |
| 54209 | TREM2    | 0.00  | 0.00  | 0.08  | 0.05  |
| 54210 | TREM1    | 0.00  | 0.00  | 0.08  | 0.01  |
| 54212 | SNTG1    | 0.13  | 0.00  | 0.11  | 0.08  |
| 54221 | SNTG2    | -0.02 | 0.00  | 0.00  | -0.06 |
| 54329 | GPR85    | 0.00  | 0.00  | -0.03 | -0.02 |
| 54332 | GDAP1    | 0.09  | 0.00  | 0.08  | 0.22  |
| 54344 | DPM3     | 0.09  | 0.00  | 0.14  | 0.21  |
| 54345 | SOX18    | 0.09  | 0.00  | 0.08  | 0.04  |
| 54361 | WNT4     | 0.00  | 0.00  | 0.00  | NaN   |
| 54363 | HAO1     | 0.00  | 0.00  | -0.05 | -0.03 |
| 54407 | SLC38A2  | 0.00  | 0.00  | 0.00  | NaN   |
| 54413 | NLGN3    | -0.04 | 0.00  | -0.08 | 0.03  |
| 54433 | NOLA1    | -0.02 | 0.00  | 0.00  | 0.01  |
| 54434 | SSH1     | 0.00  | 0.00  | 0.00  | NaN   |
| 54453 | RIN2     | 0.00  | 0.00  | -0.08 | 0.26  |
| 54457 | TAF7L    | -0.05 | 0.00  | -0.08 | 0.03  |
| 54462 | KIAA1128 | -0.02 | 0.00  | -0.05 | 0.27  |
| 54463 | FLJ20152 | 0.02  | 0.18  | 0.00  | 0.12  |
| 54468 | FLJ20323 | 0.00  | 0.00  | 0.03  | 0.29  |
| 54472 | TOLLIP   | 0.00  | 0.00  | 0.00  | NaN   |
| 54474 | KRT20    | 0.00  | 0.09  | 0.00  | 0.05  |
| 54476 | TRIAD3   | 0.00  | 0.00  | 0.00  | NaN   |
| 54487 | DGCR8    | -0.02 | 0.00  | 0.08  | 0.03  |
| 54502 | FLJ20273 | -0.04 | 0.00  | -0.08 | 0.30  |
| 54504 | CPVL     | -0.02 | 0.18  | -0.03 | 0.02  |
| 54530 | FLJ20054 | 0.07  | 0.00  | 0.03  | 0.14  |
| 54542 | MNAB     | -0.02 | 0.00  | 0.00  | 0.48  |
| 54554 | WDR5B    | 0.00  | 0.00  | -0.03 | -0.30 |
| 54556 | ING3     | 0.00  | 0.00  | -0.03 | 0.13  |
| 54558 | SPATA6   | 0.00  | 0.00  | -0.03 | 0.04  |
| 54576 | UGT1A8   | 0.00  | 0.00  | 0.00  | NaN   |
| 54583 | EGLN1    | 0.09  | 0.00  | 0.03  | 0.06  |
| 54585 | LZTFL1   | -0.04 | 0.00  | 0.00  | -0.05 |
| 54621 | FLJ20674 | 0.00  | 0.00  | -0.03 | 0.07  |
| 54676 | GTPBP2   | 0.00  | 0.00  | 0.11  | 0.18  |
| 54677 | CROT     | 0.02  | 0.00  | 0.00  | -0.01 |
| 54714 | CNGB3    | 0.15  | 0.00  | 0.14  | -0.02 |
| 54715 | A2BP1    | 0.02  | 0.00  | 0.00  | 0.03  |
| 54718 | BTN2A3   | 0.00  | 0.00  | 0.03  | 0.03  |
| 54766 | BTG4     | -0.07 | 0.00  | 0.00  | -0.04 |
| 54788 | DNAJB12  | -0.02 | 0.00  | 0.00  | 0.14  |
| 54795 | TRPM4    | 0.00  | 0.00  | -0.03 | 0.01  |
| 54805 | CNNM2    | 0.00  | 0.00  | -0.03 | 0.01  |
| 54810 | GIPC2    | -0.02 | 0.00  | -0.03 | -0.12 |
| 54821 | FLJ20105 | -0.04 | 0.00  | -0.08 | -0.01 |

|       |          |       |       |       |       |
|-------|----------|-------|-------|-------|-------|
| 54834 | GDAP2    | 0.00  | 0.00  | -0.03 | -0.10 |
| 54840 | APTX     | -0.04 | 0.09  | 0.00  | 0.41  |
| 54842 | FLJ20160 | 0.00  | 0.00  | 0.00  | NaN   |
| 54848 | FLJ20184 | -0.02 | 0.00  | 0.00  | 0.06  |
| 54849 | FLJ20186 | -0.04 | 0.00  | 0.00  | 0.12  |
| 54860 | MS4A12   | -0.02 | 0.00  | 0.03  | 0.18  |
| 54866 | PPP1R14D | 0.00  | 0.00  | -0.14 | -0.02 |
| 54867 | FLJ20254 | 0.00  | 0.00  | 0.00  | NaN   |
| 54873 | PALMD    | -0.02 | 0.00  | -0.03 | 0.12  |
| 54878 | DPP8     | 0.00  | 0.09  | -0.05 | 0.18  |
| 54879 | ST7L     | 0.02  | 0.00  | -0.03 | 0.17  |
| 54891 | FLJ20309 | 0.00  | 0.00  | 0.00  | NaN   |
| 54898 | ELOVL2   | -0.02 | 0.00  | 0.11  | 0.03  |
| 54904 | WHSC1L1  | 0.16  | 0.09  | 0.11  | 0.51  |
| 54910 | SEMA4C   | 0.00  | 0.00  | 0.00  | NaN   |
| 54932 | FLJ20433 | 0.02  | 0.00  | 0.03  | -0.15 |
| 54943 | C21orf55 | 0.00  | 0.00  | 0.00  | 0.00  |
| 54948 | MRPL16   | -0.04 | 0.00  | 0.00  | 0.13  |
| 54953 | C1orf27  | 0.04  | 0.09  | 0.03  | 0.24  |
| 54971 | BANP     | -0.04 | 0.00  | 0.00  | 0.18  |
| 54976 | C20orf27 | 0.02  | 0.00  | -0.03 | 0.07  |
| 54979 | HRASLS2  | 0.00  | 0.00  | 0.03  | 0.01  |
| 54982 | CLN6     | 0.00  | 0.00  | -0.05 | 0.01  |
| 54988 | FLJ20581 | 0.02  | -0.09 | 0.00  | 0.09  |
| 54994 | C20orf11 | 0.04  | 0.09  | 0.08  | 0.31  |
| 55020 | FLJ20699 | -0.02 | 0.00  | -0.03 | -0.01 |
| 55022 | FLJ20701 | 0.00  | 0.00  | 0.00  | NaN   |
| 55023 | PHIP     | -0.04 | 0.00  | -0.03 | 0.07  |
| 55038 | CDCA4    | 0.00  | 0.00  | 0.08  | -0.06 |
| 55040 | EPN3     | 0.15  | 0.18  | 0.03  | 0.38  |
| 55049 | FLJ20850 | 0.02  | 0.00  | 0.00  | 0.30  |
| 55074 | OXR1     | 0.20  | 0.09  | 0.30  | 0.19  |
| 55082 | FLJ10154 | -0.02 | 0.00  | -0.05 | 0.27  |
| 55084 | FLJ10159 | 0.07  | 0.00  | 0.03  | -0.06 |
| 55089 | SLC38A4  | 0.00  | 0.00  | 0.00  | NaN   |
| 55101 | FLJ10241 | 0.02  | 0.00  | -0.03 | 0.29  |
| 55110 | FLJ10292 | 0.00  | -0.18 | 0.08  | 0.15  |
| 55118 | CRTAC1   | -0.02 | 0.00  | -0.03 | -0.05 |
| 55124 | PIWIL2   | -0.13 | -0.18 | -0.22 | -0.04 |
| 55146 | ZDHHC4   | 0.00  | 0.00  | 0.00  | NaN   |
| 55168 | MRPS18A  | 0.00  | 0.00  | 0.11  | 0.20  |
| 55173 | MRPS10   | 0.00  | 0.00  | 0.08  | 0.28  |
| 55184 | C20orf12 | 0.00  | 0.00  | -0.08 | 0.15  |
| 55193 | PB1      | 0.00  | 0.00  | 0.00  | NaN   |
| 55217 | TMLHE    | -0.05 | 0.09  | -0.11 | 0.07  |
| 55228 | FLJ10781 | -0.02 | 0.00  | -0.03 | 0.04  |
| 55238 | FLJ10815 | -0.07 | 0.00  | 0.00  | 0.23  |

|       |             |       |       |       |       |
|-------|-------------|-------|-------|-------|-------|
| 55243 | KIRREL      | 0.02  | 0.00  | 0.16  | 0.31  |
| 55244 | FLJ10847    | -0.04 | 0.09  | 0.03  | 0.06  |
| 55245 | C20orf44    | 0.05  | 0.00  | 0.00  | 0.12  |
| 55257 | C20orf20    | 0.04  | 0.09  | 0.08  | 0.32  |
| 55258 | FLJ10916    | 0.00  | 0.00  | 0.00  | NaN   |
| 55277 | FLJ10986    | 0.00  | 0.00  | 0.00  | -0.07 |
| 55283 | MCOLN3      | -0.02 | 0.00  | -0.03 | 0.02  |
| 55290 | BRF2        | 0.16  | 0.09  | 0.08  | 0.66  |
| 55294 | FBXW7       | -0.02 | 0.00  | 0.00  | 0.04  |
| 55313 | FLJ11151    | 0.02  | 0.00  | 0.00  | 0.04  |
| 55317 | C20orf29    | 0.02  | 0.00  | -0.03 | 0.02  |
| 55319 | FLJ11184    | 0.02  | 0.00  | -0.05 | 0.09  |
| 55321 | C20orf46    | 0.02  | 0.00  | -0.03 | 0.09  |
| 55336 | FBXL8       | -0.04 | 0.00  | 0.00  | 0.07  |
| 55337 | FLJ11286    | 0.00  | 0.00  | 0.00  | NaN   |
| 55350 | VNN3        | -0.02 | 0.00  | 0.11  | 0.11  |
| 55355 | DKFZp762E13 | 0.00  | 0.00  | 0.00  | NaN   |
| 55357 | TBC1D2      | -0.02 | 0.00  | 0.00  | 0.07  |
| 55361 | PI4KII      | -0.02 | 0.00  | -0.03 | 0.06  |
| 55364 | IMPACT      | 0.00  | -0.09 | 0.03  | 0.05  |
| 55367 | LRDD        | 0.00  | 0.09  | 0.00  | 0.17  |
| 55388 | MCM10       | 0.02  | 0.00  | 0.14  | 0.27  |
| 55466 | DNAJA4      | 0.00  | 0.00  | -0.03 | -0.02 |
| 55471 | PRO1853     | 0.00  | 0.00  | 0.00  | NaN   |
| 55486 | PARL        | 0.04  | 0.00  | 0.00  | 0.32  |
| 55505 | NOLA3       | -0.02 | 0.00  | -0.16 | 0.20  |
| 55506 | H2AFY2      | -0.02 | 0.00  | 0.00  | 0.07  |
| 55507 | GPRC5D      | 0.00  | -0.09 | 0.05  | 0.04  |
| 55509 | SNFT        | 0.07  | 0.00  | 0.00  | 0.11  |
| 55520 | ELAC1       | -0.02 | -0.09 | -0.05 | 0.09  |
| 55521 | TRIM36      | 0.00  | 0.00  | -0.05 | -0.01 |
| 55554 | KLK15       | 0.00  | 0.00  | -0.03 | 0.07  |
| 55576 | STAB2       | 0.00  | 0.00  | 0.00  | NaN   |
| 55577 | NAGK        | 0.02  | 0.00  | 0.00  | 0.05  |
| 55584 | CHRNA9      | -0.04 | 0.00  | -0.08 | 0.09  |
| 55601 | FLJ20035    | -0.02 | 0.00  | -0.05 | 0.16  |
| 55607 | PPP1R9A     | 0.02  | 0.00  | -0.03 | 0.03  |
| 55612 | C20orf42    | 0.00  | 0.00  | -0.05 | -0.02 |
| 55625 | ZDHHC7      | -0.09 | 0.00  | 0.00  | 0.28  |
| 55626 | FLJ20294    | -0.02 | 0.00  | -0.03 | 0.29  |
| 55630 | SLC39A4     | 0.15  | 0.00  | 0.30  | 0.14  |
| 55638 | FLJ20366    | 0.18  | 0.09  | 0.27  | -0.01 |
| 55643 | BTBD2       | 0.00  | 0.00  | -0.03 | 0.09  |
| 55644 | OSGEP       | -0.02 | 0.00  | -0.03 | 0.15  |
| 55647 | RAB20       | 0.00  | 0.00  | -0.03 | 0.10  |
| 55651 | NOLA2       | 0.00  | 0.00  | 0.00  | NaN   |
| 55652 | FLJ20489    | 0.00  | 0.00  | 0.00  | NaN   |

|       |          |       |       |       |       |
|-------|----------|-------|-------|-------|-------|
| 55653 | BCAS4    | 0.07  | 0.09  | 0.05  | 0.40  |
| 55661 | DDX27    | 0.07  | 0.00  | 0.03  | 0.22  |
| 55662 | HIF1AN   | -0.02 | 0.00  | -0.03 | 0.05  |
| 55665 | URG4     | -0.02 | 0.00  | 0.05  | 0.14  |
| 55669 | MFN1     | 0.04  | 0.00  | 0.03  | 0.38  |
| 55683 | FLJ10081 | 0.00  | 0.00  | 0.00  | NaN   |
| 55692 | LUC7L    | 0.05  | 0.09  | 0.03  | 0.22  |
| 55701 | FLJ10357 | -0.02 | 0.00  | 0.00  | 0.12  |
| 55713 | ZNF334   | 0.02  | 0.00  | 0.03  | 0.00  |
| 55715 | DOK4     | -0.05 | 0.00  | 0.00  | 0.16  |
| 55734 | ZFP64    | 0.09  | 0.00  | 0.05  | 0.34  |
| 55737 | VPS35    | -0.11 | 0.09  | 0.03  | 0.37  |
| 55739 | FLJ10769 | 0.00  | 0.00  | -0.03 | 0.31  |
| 55742 | PARVA    | 0.00  | 0.00  | -0.05 | 0.06  |
| 55743 | CHFR     | 0.00  | 0.00  | 0.00  | NaN   |
| 55746 | NUP133   | 0.07  | 0.00  | 0.03  | 0.12  |
| 55757 | UGCGL2   | -0.02 | 0.00  | -0.05 | 0.00  |
| 55759 | WDR12    | 0.02  | 0.00  | 0.00  | 0.19  |
| 55766 | H2AFJ    | 0.00  | -0.09 | 0.05  | -0.07 |
| 55769 | ZNF83    | 0.00  | 0.00  | -0.03 | 0.27  |
| 55775 | TDP1     | -0.02 | 0.00  | 0.03  | 0.39  |
| 55790 | ChGn     | -0.15 | -0.18 | -0.22 | 0.08  |
| 55794 | DDX28    | -0.05 | 0.00  | 0.00  | 0.17  |
| 55799 | CACNA2D3 | -0.04 | 0.00  | -0.03 | 0.00  |
| 55801 | IL26     | 0.02  | 0.00  | 0.00  | 0.11  |
| 55803 | CENTA2   | 0.02  | 0.00  | 0.00  | 0.07  |
| 55806 | HR       | -0.13 | -0.18 | -0.22 | -0.06 |
| 55811 | SAC      | 0.04  | 0.00  | 0.05  | 0.04  |
| 55821 | ALLC     | -0.02 | 0.00  | 0.00  | 0.14  |
| 55823 | VPS11    | -0.05 | 0.00  | 0.00  | 0.08  |
| 55835 | CENPJ    | -0.05 | 0.00  | -0.08 | -0.08 |
| 55850 | MDS032   | 0.04  | 0.00  | 0.00  | 0.16  |
| 55857 | C20orf19 | 0.00  | 0.00  | -0.05 | 0.08  |
| 55859 | BEX1     | -0.05 | 0.00  | -0.08 | 0.01  |
| 55867 | SLC22A11 | 0.00  | -0.09 | 0.03  | -0.06 |
| 55879 | GABRQ    | -0.02 | 0.00  | -0.11 | 0.04  |
| 55890 | GPRC5C   | 0.04  | 0.27  | 0.08  | 0.31  |
| 55891 | LENEP    | 0.09  | 0.00  | 0.14  | 0.08  |
| 55892 | MYNN     | 0.04  | 0.00  | 0.05  | 0.25  |
| 55900 | ZNF302   | 0.00  | 0.00  | 0.05  | -0.04 |
| 55905 | ZNF313   | 0.05  | 0.00  | 0.05  | 0.39  |
| 55907 | CMAS     | 0.00  | -0.09 | 0.05  | 0.03  |
| 55909 | BIN3     | -0.13 | -0.18 | -0.22 | 0.23  |
| 55914 | ERBB2IP  | 0.00  | 0.00  | -0.11 | 0.15  |
| 55915 | LANCL2   | 0.00  | 0.00  | 0.08  | 0.61  |
| 55930 | MYO5C    | -0.02 | 0.00  | -0.05 | 0.35  |
| 55957 | F25965   | 0.02  | 0.09  | 0.05  | -0.04 |

|       |          |       |       |       |       |
|-------|----------|-------|-------|-------|-------|
| 55968 | NSFL1C   | 0.02  | 0.00  | -0.03 | 0.12  |
| 55969 | C20orf24 | 0.02  | 0.00  | 0.00  | 0.21  |
| 56000 | NXF3     | -0.05 | 0.00  | -0.08 | -0.05 |
| 56006 | FLJ12886 | -0.02 | 0.00  | -0.03 | -0.19 |
| 56033 | BARX1    | -0.02 | 0.00  | 0.00  | -0.02 |
| 56034 | PDGFC    | -0.02 | 0.00  | -0.03 | 0.03  |
| 56061 | UBPH     | 0.02  | 0.00  | 0.00  | 0.09  |
| 56062 | KLHL4    | -0.07 | 0.00  | -0.08 | -0.09 |
| 56114 | PCDHGA1  | 0.00  | 0.00  | 0.00  | NaN   |
| 56123 | PCDHB13  | 0.00  | 0.00  | 0.00  | NaN   |
| 56124 | PCDHB12  | 0.00  | 0.00  | 0.00  | NaN   |
| 56125 | PCDHB11  | 0.00  | 0.00  | 0.00  | NaN   |
| 56130 | PCDHB6   | 0.00  | 0.00  | 0.00  | NaN   |
| 56132 | PCDHB3   | 0.00  | 0.00  | 0.00  | NaN   |
| 56154 | TEX15    | -0.09 | -0.18 | -0.19 | 0.04  |
| 56155 | TEX14    | 0.18  | 0.00  | 0.03  | 0.06  |
| 56156 | TEX13B   | -0.05 | 0.00  | -0.08 | -0.11 |
| 56158 | TEX12    | -0.07 | 0.00  | 0.00  | -0.07 |
| 56159 | TEX11    | -0.04 | 0.00  | -0.08 | 0.03  |
| 56163 | RNF17    | -0.05 | 0.00  | -0.08 | 0.03  |
| 56165 | TDRD1    | -0.04 | 0.00  | 0.03  | -0.01 |
| 56171 | DNAH7    | 0.02  | 0.00  | 0.00  | 0.06  |
| 56172 | ANKH     | 0.02  | 0.18  | 0.00  | 0.12  |
| 56242 | ZNF253   | 0.02  | 0.00  | 0.00  | 0.09  |
| 56244 | BTNL2    | 0.00  | 0.00  | 0.05  | -0.28 |
| 56245 | C21orf62 | 0.00  | 0.00  | -0.03 | -0.10 |
| 56253 | CRTAM    | -0.04 | 0.00  | -0.03 | 0.18  |
| 56288 | PARD3    | -0.02 | 0.00  | 0.03  | 0.27  |
| 56302 | TRPV5    | 0.02  | 0.00  | 0.00  | 0.04  |
| 56340 | PPP4R2   | -0.05 | 0.00  | -0.03 | 0.26  |
| 56342 | PPAN     | 0.00  | 0.00  | 0.00  | NaN   |
| 56344 | CABP5    | -0.02 | 0.00  | -0.03 | -0.18 |
| 56474 | CTPS2    | -0.05 | 0.00  | -0.11 | 0.04  |
| 56547 | MMP26    | -0.02 | -0.09 | -0.03 | 0.05  |
| 56548 | CHST7    | -0.05 | 0.00  | -0.11 | -0.06 |
| 56606 | SLC2A9   | -0.02 | 0.00  | 0.00  | 0.02  |
| 56647 | BCCIP    | -0.04 | 0.00  | 0.03  | 0.19  |
| 56648 | EIF5A2   | 0.05  | 0.00  | 0.05  | -0.04 |
| 56659 | KCNK13   | -0.02 | 0.00  | 0.03  | 0.05  |
| 56660 | KCNK12   | 0.02  | 0.00  | 0.00  | -0.09 |
| 56672 | C11orf17 | 0.00  | 0.00  | -0.08 | 0.16  |
| 56673 | C11orf16 | 0.00  | 0.00  | -0.08 | -0.08 |
| 56676 | ASCL3    | 0.00  | 0.00  | -0.08 | -0.14 |
| 56683 | C21orf59 | 0.00  | 0.00  | -0.03 | 0.07  |
| 56731 | SLC2A4RG | 0.05  | 0.00  | 0.08  | 0.28  |
| 56848 | SPHK2    | 0.00  | 0.00  | -0.03 | 0.10  |
| 56886 | UGCG1    | -0.02 | 0.00  | 0.00  | 0.17  |



|       |          |       |       |       |       |
|-------|----------|-------|-------|-------|-------|
| 56890 | MDM1     | 0.02  | 0.09  | 0.00  | 0.24  |
| 56892 | C8orf4   | 0.09  | 0.18  | 0.08  | 0.02  |
| 56894 | AGPAT3   | 0.00  | 0.00  | 0.00  | 0.24  |
| 56904 | SH3GLB2  | 0.02  | 0.00  | 0.03  | 0.21  |
| 56910 | STARD7   | 0.00  | 0.00  | 0.00  | NaN   |
| 56911 | C21orf7  | -0.02 | 0.00  | 0.05  | 0.00  |
| 56913 | C1GALT1  | 0.00  | 0.00  | 0.03  | 0.11  |
| 56914 | OTOR     | 0.00  | 0.00  | -0.08 | -0.09 |
| 56922 | MCCC1    | 0.04  | 0.00  | 0.00  | 0.14  |
| 56924 | PAK6     | -0.02 | 0.00  | -0.14 | 0.02  |
| 56929 | FEM1A    | 0.00  | 0.00  | 0.00  | NaN   |
| 56937 | TMEPAI   | 0.09  | 0.00  | 0.05  | 0.23  |
| 56938 | ARNTL2   | 0.00  | -0.09 | 0.03  | 0.15  |
| 56945 | MRPS22   | 0.02  | 0.00  | 0.00  | 0.34  |
| 56953 | NT5M     | -0.07 | 0.00  | 0.00  | 0.13  |
| 56954 | NIT2     | 0.00  | 0.00  | 0.00  | 0.36  |
| 56955 | MEPE     | -0.04 | 0.00  | -0.03 | 0.11  |
| 56978 | PRDM8    | -0.04 | 0.00  | -0.03 | -0.13 |
| 56979 | PRDM9    | 0.02  | 0.18  | 0.00  | -0.04 |
| 56980 | PRDM10   | -0.05 | 0.00  | -0.03 | 0.19  |
| 56981 | PRDM11   | -0.02 | 0.00  | -0.03 | 0.00  |
| 56993 | TOMM22   | -0.04 | 0.00  | -0.03 | 0.20  |
| 56994 | CHPT1    | 0.00  | 0.00  | 0.03  | 0.27  |
| 56997 | CABC1    | 0.07  | 0.00  | 0.03  | 0.16  |
| 56998 | CTNNBIP1 | -0.02 | 0.00  | 0.00  | 0.25  |
| 56999 | ADAMTS9  | -0.05 | 0.00  | 0.00  | 0.07  |
| 57016 | AKR1B10  | 0.02  | 0.00  | 0.00  | 0.01  |
| 57020 | MGC16824 | 0.02  | -0.09 | 0.00  | 0.14  |
| 57030 | SLC17A7  | 0.02  | 0.00  | -0.03 | -0.22 |
| 57047 | PLSCR2   | 0.02  | 0.00  | 0.00  | -0.23 |
| 57048 | PLSCR3   | -0.05 | 0.00  | 0.00  | 0.19  |
| 57050 | SAS10    | -0.02 | 0.00  | 0.00  | 0.06  |
| 57053 | CHRNA10  | -0.02 | 0.00  | -0.03 | -0.04 |
| 57060 | PCBP4    | 0.00  | 0.00  | 0.00  | NaN   |
| 57062 | DDX24    | -0.02 | 0.00  | 0.00  | 0.18  |
| 57084 | SLC17A6  | 0.00  | 0.00  | -0.05 | -0.01 |
| 57088 | PLSCR4   | 0.02  | 0.00  | 0.00  | 0.04  |
| 57091 | C20orf32 | 0.04  | 0.00  | 0.05  | 0.13  |
| 57096 | RPGRIP1  | -0.02 | 0.00  | 0.00  | 0.07  |
| 57102 | C12orf4  | -0.02 | 0.09  | 0.08  | 0.07  |
| 57103 | C12orf5  | -0.02 | 0.09  | 0.08  | 0.27  |
| 57110 | HRASLS   | 0.02  | 0.09  | 0.00  | 0.26  |
| 57111 | RAB25    | 0.09  | 0.00  | 0.14  | 0.18  |
| 57119 | SPINLW1  | 0.02  | 0.00  | 0.03  | 0.04  |
| 57122 | NUP107   | 0.02  | 0.09  | 0.00  | 0.64  |
| 57127 | RHBG     | 0.04  | 0.00  | 0.11  | 0.00  |
| 57139 | RGL3     | 0.00  | 0.00  | 0.00  | NaN   |

|       |           |       |       |       |       |
|-------|-----------|-------|-------|-------|-------|
| 57140 | RNPEPL1   | 0.00  | 0.00  | 0.00  | NaN   |
| 57142 | RTN4      | 0.00  | 0.00  | 0.00  | NaN   |
| 57144 | PAK7      | 0.00  | 0.00  | -0.05 | 0.12  |
| 57148 | KIAA1219  | 0.02  | 0.00  | 0.03  | 0.24  |
| 57154 | SMURF1    | 0.02  | 0.00  | 0.00  | 0.08  |
| 57158 | JPH2      | 0.02  | 0.09  | 0.03  | 0.01  |
| 57161 | PELI2     | 0.00  | 0.00  | 0.00  | -0.09 |
| 57162 | PELI1     | 0.02  | 0.00  | 0.00  | 0.01  |
| 57172 | CAMK1G    | 0.07  | 0.00  | 0.00  | -0.01 |
| 57192 | MCOLN1    | 0.00  | -0.09 | 0.00  | -0.09 |
| 57198 | ATP8B2    | 0.05  | 0.00  | 0.14  | -0.08 |
| 57205 | ATP10D    | -0.04 | 0.00  | -0.03 | 0.39  |
| 57213 | C13orf1   | -0.07 | 0.00  | -0.11 | 0.00  |
| 57214 | KIAA1199  | 0.00  | 0.00  | -0.03 | -0.08 |
| 57231 | SNX14     | -0.02 | 0.00  | -0.05 | -0.15 |
| 57282 | SLC4A10   | -0.02 | 0.00  | 0.03  | 0.13  |
| 57332 | CBX8      | 0.04  | 0.09  | 0.00  | 0.32  |
| 57336 | ZNF287    | -0.07 | 0.00  | -0.03 | 0.01  |
| 57337 | SENP7     | 0.00  | 0.00  | -0.03 | 0.18  |
| 57338 | JPH3      | -0.07 | 0.00  | 0.00  | 0.03  |
| 57343 | ZNF304    | 0.00  | 0.09  | 0.00  | 0.30  |
| 57348 | TTYH1     | 0.00  | 0.09  | -0.03 | -0.05 |
| 57369 | CX36      | -0.02 | 0.00  | -0.16 | -0.19 |
| 57379 | AICDA     | 0.00  | -0.09 | 0.05  | -0.13 |
| 57380 | MRS2L     | 0.00  | 0.00  | 0.03  | 0.18  |
| 57403 | RAB22A    | 0.07  | 0.09  | 0.05  | 0.33  |
| 57418 | WDR18     | 0.00  | 0.00  | -0.03 | -0.01 |
| 57419 | SLC24A3   | 0.00  | 0.00  | -0.08 | 0.17  |
| 57446 | NDRG3     | 0.04  | 0.00  | 0.00  | 0.18  |
| 57447 | NDRG2     | -0.02 | 0.00  | 0.00  | -0.07 |
| 57468 | SLC12A5   | 0.02  | 0.00  | 0.03  | 0.06  |
| 57498 | KIDINS220 | -0.02 | 0.00  | 0.00  | 0.00  |
| 57513 | CASKIN2   | 0.05  | 0.27  | 0.03  | 0.36  |
| 57535 | KIAA1324  | 0.00  | 0.00  | -0.03 | 0.12  |
| 57556 | SEMA6A    | 0.00  | 0.00  | -0.03 | 0.11  |
| 57579 | KIAA1411  | 0.00  | 0.00  | 0.00  | 0.00  |
| 57586 | SYT13     | -0.02 | 0.00  | -0.03 | -0.03 |
| 57591 | MKL1      | -0.02 | 0.00  | -0.03 | 0.17  |
| 57596 | KIAA1446  | 0.02  | 0.00  | 0.03  | -0.03 |
| 57604 | KIAA1456  | -0.16 | -0.18 | -0.22 | 0.17  |
| 57634 | EP400     | 0.00  | 0.00  | 0.00  | NaN   |
| 57663 | USP29     | 0.02  | 0.09  | 0.00  | -0.11 |
| 57664 | PLEKHA4   | 0.00  | 0.00  | -0.03 | 0.06  |
| 57698 | KIAA1598  | -0.04 | 0.00  | 0.00  | -0.01 |
| 57707 | KIAA1609  | -0.09 | 0.00  | 0.00  | 0.21  |
| 57712 | TRPM3     | -0.02 | 0.00  | -0.03 | 0.03  |
| 57715 | SEMA4G    | -0.02 | 0.00  | -0.03 | 0.01  |

|       |          |       |       |       |       |
|-------|----------|-------|-------|-------|-------|
| 57716 | PRX      | 0.00  | 0.09  | 0.03  | 0.08  |
| 57718 | KIAA1622 | -0.02 | 0.00  | 0.00  | 0.06  |
| 57720 | GPR107   | 0.02  | 0.00  | 0.00  | 0.12  |
| 57731 | SPTBN4   | 0.00  | 0.09  | 0.03  | 0.05  |
| 57763 | ANKRA2   | 0.00  | 0.00  | -0.11 | 0.21  |
| 57786 | RBAK     | 0.00  | 0.00  | 0.03  | -0.10 |
| 57799 | RAB40C   | 0.04  | 0.18  | 0.05  | 0.07  |
| 57804 | POLD4    | 0.09  | 0.09  | 0.03  | 0.18  |
| 57817 | HAMP     | 0.02  | 0.00  | 0.05  | 0.23  |
| 57834 | CYP4F11  | 0.00  | 0.00  | 0.00  | NaN   |
| 57835 | SLC4A5   | 0.00  | 0.00  | 0.00  | NaN   |
| 58155 | PTBP2    | -0.02 | 0.00  | -0.03 | 0.12  |
| 58157 | NGB      | -0.02 | 0.00  | -0.03 | 0.15  |
| 58158 | NEUROD4  | -0.02 | 0.00  | -0.05 | -0.03 |
| 58189 | WFDC1    | -0.09 | 0.00  | 0.00  | 0.10  |
| 58472 | SQRDL    | -0.04 | 0.00  | -0.11 | 0.23  |
| 58478 | MASA     | -0.04 | 0.00  | -0.03 | 0.12  |
| 58488 | PCTP     | 0.13  | 0.09  | 0.03  | 0.44  |
| 58494 | JAM2     | 0.00  | 0.00  | 0.03  | 0.04  |
| 58503 | PROL1    | -0.02 | 0.00  | 0.00  | -0.02 |
| 58529 | MYOZ1    | 0.04  | 0.00  | 0.00  | -0.08 |
| 58533 | SNX6     | 0.02  | 0.09  | 0.00  | 0.31  |
| 58986 | TMEM8    | 0.11  | 0.18  | 0.11  | 0.16  |
| 59067 | IL21     | 0.00  | 0.00  | -0.03 | -0.06 |
| 59269 | HIVEP3   | 0.00  | 0.00  | 0.00  | NaN   |
| 59272 | ACE2     | -0.05 | 0.00  | -0.14 | -0.01 |
| 59286 | UBL5     | 0.00  | 0.00  | 0.00  | NaN   |
| 59307 | SIGIRR   | 0.00  | 0.09  | 0.05  | -0.10 |
| 59335 | PRDM12   | 0.02  | 0.00  | 0.03  | -0.07 |
| 59336 | PRDM13   | 0.00  | 0.00  | 0.00  | -0.08 |
| 59338 | PLEKHA1  | -0.04 | 0.00  | -0.03 | 0.02  |
| 59340 | HRH4     | 0.00  | -0.09 | 0.03  | 0.06  |
| 59341 | TRPV4    | 0.00  | 0.00  | 0.00  | NaN   |
| 59343 | SENP2    | 0.04  | 0.00  | 0.00  | 0.28  |
| 59344 | ALOXE3   | -0.05 | 0.00  | 0.00  | 0.05  |
| 59347 | FKSG2    | 0.13  | 0.18  | 0.05  | 0.07  |
| 60312 | AFAP     | -0.02 | 0.00  | 0.00  | -0.09 |
| 60314 | C12orf10 | 0.02  | 0.00  | -0.03 | 0.20  |
| 60385 | TSKS     | 0.02  | 0.00  | -0.03 | -0.12 |
| 60436 | TGIF2    | 0.02  | 0.00  | 0.00  | 0.12  |
| 60468 | BACH2    | -0.04 | 0.00  | 0.00  | 0.07  |
| 60482 | SLC5A7   | 0.00  | 0.00  | 0.00  | NaN   |
| 60488 | MRPS35   | -0.02 | -0.09 | 0.03  | 0.16  |
| 60491 | NIF3L1   | 0.00  | 0.00  | 0.00  | NaN   |
| 60496 | AASDHPPT | -0.07 | -0.09 | 0.00  | 0.13  |
| 60506 | NYX      | -0.05 | 0.00  | -0.11 | -0.12 |
| 60509 | FLJ21839 | 0.00  | 0.00  | 0.00  | NaN   |

|       |          |       |       |       |       |
|-------|----------|-------|-------|-------|-------|
| 60528 | ELAC2    | -0.07 | 0.00  | -0.03 | 0.10  |
| 60529 | ALX4     | -0.02 | 0.00  | -0.03 | -0.20 |
| 60598 | KCNK15   | 0.02  | 0.09  | 0.03  | 0.25  |
| 60681 | FKBP10   | -0.04 | 0.18  | 0.00  | 0.10  |
| 60682 | SMAP1    | 0.00  | 0.00  | 0.00  | 0.36  |
| 60684 | FLJ12716 | -0.02 | 0.00  | -0.05 | 0.33  |
| 63826 | SRR      | -0.05 | 0.00  | 0.00  | 0.05  |
| 63827 | BCAN     | 0.04  | 0.00  | 0.11  | 0.02  |
| 63875 | MRPL17   | -0.02 | 0.00  | -0.05 | 0.11  |
| 63876 | PKNOX2   | -0.05 | 0.00  | -0.03 | 0.11  |
| 63910 | C20orf59 | 0.04  | 0.09  | 0.08  | 0.06  |
| 63916 | ELMO2    | 0.02  | 0.00  | 0.03  | 0.19  |
| 63925 | ZNF335   | 0.04  | 0.00  | 0.03  | 0.13  |
| 63926 | ANKRD5   | 0.00  | 0.00  | -0.05 | 0.16  |
| 63931 | MRPS14   | 0.00  | 0.00  | 0.03  | 0.36  |
| 63935 | C20orf67 | 0.04  | 0.00  | 0.03  | 0.05  |
| 63941 | APBA2BP  | 0.00  | 0.00  | 0.00  | NaN   |
| 63943 | FKBPL    | 0.00  | 0.00  | 0.05  | 0.14  |
| 63970 | P53AIP1  | -0.05 | 0.00  | -0.03 | -0.03 |
| 63971 | KIF13A   | 0.00  | 0.00  | 0.08  | 0.13  |
| 63974 | NEUROD6  | -0.02 | 0.09  | -0.03 | -0.13 |
| 63976 | PRDM16   | -0.02 | 0.00  | 0.05  | 0.10  |
| 63978 | PRDM14   | 0.15  | 0.00  | 0.14  | 0.13  |
| 64063 | PRSS22   | 0.04  | 0.09  | 0.00  | 0.08  |
| 64066 | MMP27    | -0.07 | -0.09 | 0.00  | 0.23  |
| 64067 | NPAS3    | 0.02  | 0.09  | 0.03  | -0.04 |
| 64077 | LHPP     | -0.04 | 0.00  | 0.03  | 0.18  |
| 64078 | SLC28A3  | -0.02 | 0.00  | 0.00  | 0.05  |
| 64083 | GOLPH3   | 0.02  | 0.18  | 0.03  | 0.37  |
| 64084 | CLSTN2   | 0.02  | 0.00  | 0.03  | 0.16  |
| 64087 | MCCC2    | 0.00  | 0.00  | -0.11 | 0.28  |
| 64089 | SNX16    | 0.13  | 0.00  | 0.14  | -0.02 |
| 64092 | SAMSN1   | -0.05 | -0.18 | 0.05  | 0.26  |
| 64096 | GFRA4    | 0.02  | 0.00  | -0.03 | -0.03 |
| 64100 | ELSPBP1  | -0.02 | 0.00  | -0.03 | -0.19 |
| 64110 | MAGEF1   | 0.04  | 0.00  | 0.00  | 0.19  |
| 64122 | FN3K     | -0.02 | 0.09  | 0.08  | 0.03  |
| 64132 | XYLT2    | 0.13  | 0.18  | 0.03  | 0.39  |
| 64137 | ABCG4    | -0.05 | 0.00  | 0.00  | 0.27  |
| 64170 | CARD9    | 0.02  | 0.00  | 0.03  | -0.03 |
| 64173 | SPATA1   | -0.02 | 0.00  | -0.03 | 0.00  |
| 64210 | MMS19L   | -0.02 | 0.00  | -0.03 | -0.04 |
| 64211 | LHX5     | 0.02  | 0.00  | 0.00  | -0.03 |
| 64216 | TFB2M    | 0.07  | 0.00  | 0.03  | 0.11  |
| 64219 | PJA1     | -0.04 | 0.00  | -0.05 | 0.17  |
| 64223 | GBL      | 0.04  | 0.09  | 0.00  | 0.15  |
| 64231 | MS4A6A   | -0.04 | 0.00  | 0.00  | 0.09  |

|       |          |       |       |       |       |
|-------|----------|-------|-------|-------|-------|
| 64232 | MS4A5    | -0.04 | 0.00  | 0.03  | 0.03  |
| 64240 | ABCG5    | 0.00  | 0.00  | 0.00  | NaN   |
| 64284 | RAB17    | 0.02  | 0.00  | 0.00  | 0.15  |
| 64320 | RNF25    | 0.00  | 0.00  | 0.00  | NaN   |
| 64321 | SOX17    | 0.09  | 0.00  | 0.14  | 0.13  |
| 64324 | NSD1     | 0.00  | 0.00  | 0.00  | NaN   |
| 64328 | XPO4     | -0.07 | 0.00  | -0.11 | 0.04  |
| 64374 | SIL1     | 0.00  | 0.00  | -0.03 | -0.02 |
| 64377 | CHST8    | 0.00  | 0.00  | 0.05  | -0.26 |
| 64386 | MMP25    | 0.04  | 0.00  | 0.00  | -0.03 |
| 64397 | ZFP106   | -0.05 | 0.09  | -0.14 | 0.33  |
| 64398 | MPP5     | -0.02 | 0.00  | 0.00  | 0.07  |
| 64400 | FTS      | -0.05 | 0.00  | 0.00  | 0.23  |
| 64405 | CDH22    | 0.02  | 0.00  | 0.03  | -0.05 |
| 64446 | DNAI2    | 0.04  | 0.27  | 0.08  | 0.10  |
| 64506 | CPEB1    | 0.00  | 0.00  | -0.03 | -0.05 |
| 64577 | ALDH8A1  | -0.02 | 0.00  | 0.16  | 0.26  |
| 64579 | NDST4    | -0.02 | 0.00  | 0.00  | 0.25  |
| 64600 | PLA2G2F  | 0.00  | 0.00  | 0.00  | NaN   |
| 64601 | VPS16    | 0.02  | 0.00  | -0.03 | 0.29  |
| 64699 | TMPRSS3  | 0.00  | 0.00  | 0.00  | 0.06  |
| 64708 | COPS7B   | 0.00  | 0.00  | 0.00  | NaN   |
| 64750 | SMURF2   | 0.16  | 0.09  | 0.03  | 0.35  |
| 64760 | RAI16    | -0.13 | -0.18 | -0.22 | 0.12  |
| 64772 | FLJ21865 | 0.02  | 0.18  | 0.03  | 0.20  |
| 64783 | RBM15    | 0.00  | 0.00  | -0.03 | -0.04 |
| 64794 | DDX31    | 0.02  | 0.00  | 0.00  | -0.08 |
| 64800 | FLJ23588 | -0.02 | 0.00  | -0.03 | 0.05  |
| 64816 | CYP3A43  | 0.02  | 0.00  | 0.00  | 0.10  |
| 64834 | ELOVL1   | 0.02  | 0.00  | 0.00  | 0.27  |
| 64849 | SLC13A3  | 0.02  | 0.00  | 0.03  | 0.16  |
| 64850 | AGXT2L1  | -0.02 | 0.00  | 0.00  | -0.02 |
| 64858 | DCLRE1B  | 0.00  | 0.00  | -0.03 | -0.03 |
| 64895 | PAPOLG   | 0.02  | 0.00  | 0.00  | 0.00  |
| 64901 | RANBP17  | 0.00  | 0.00  | -0.03 | 0.04  |
| 64919 | BCL11B   | -0.02 | 0.00  | -0.03 | 0.08  |
| 64960 | MRPS15   | -0.02 | 0.00  | 0.00  | 0.01  |
| 64963 | MRPS11   | 0.00  | 0.00  | -0.05 | 0.02  |
| 64981 | MRPL34   | 0.04  | 0.00  | 0.00  | 0.24  |
| 65003 | MRPL11   | 0.07  | 0.00  | 0.03  | 0.24  |
| 65005 | MRPL9    | 0.07  | 0.00  | 0.19  | 0.30  |
| 65009 | NDRG4    | -0.07 | 0.00  | 0.00  | 0.16  |
| 65010 | SLC26A6  | -0.04 | 0.00  | 0.00  | 0.05  |
| 65012 | SLC26A10 | 0.02  | 0.00  | 0.00  | 0.06  |
| 65018 | PINK1    | 0.00  | 0.00  | 0.00  | NaN   |
| 65080 | MRPL44   | 0.00  | 0.00  | 0.00  | NaN   |
| 65082 | VPS33A   | 0.02  | 0.00  | 0.00  | -0.02 |

|       |           |       |       |       |       |
|-------|-----------|-------|-------|-------|-------|
| 65095 | FLJ12949  | 0.02  | 0.00  | 0.00  | 0.24  |
| 65109 | UPF3B     | -0.05 | 0.00  | -0.08 | 0.15  |
| 65110 | UPF3A     | 0.00  | 0.00  | 0.00  | 0.22  |
| 65117 | FLJ11021  | 0.02  | 0.00  | 0.00  | 0.27  |
| 65250 | FLJ13231  | 0.04  | 0.18  | 0.00  | 0.21  |
| 65258 | MPPE1     | -0.02 | -0.09 | 0.00  | 0.19  |
| 65992 | C20orf116 | 0.02  | 0.00  | -0.03 | 0.14  |
| 65993 | MRPS34    | 0.04  | 0.18  | 0.00  | 0.27  |
| 66002 | CYP4F12   | 0.00  | 0.00  | 0.00  | NaN   |
| 66035 | SLC2A11   | -0.02 | 0.00  | 0.03  | 0.22  |
| 66036 | MTMR8     | -0.04 | 0.00  | -0.05 | -0.09 |
| 78988 | MRP63     | -0.07 | 0.00  | -0.11 | 0.19  |
| 79033 | PRNPIP    | 0.00  | 0.00  | 0.03  | 0.29  |
| 79054 | TRPM8     | 0.00  | 0.00  | 0.00  | NaN   |
| 79058 | ASPSCR1   | 0.00  | 0.09  | 0.08  | 0.00  |
| 79083 | MLPH      | 0.02  | 0.00  | 0.00  | 0.14  |
| 79092 | CARD14    | 0.00  | 0.00  | -0.03 | 0.05  |
| 79095 | C9orf16   | 0.02  | 0.00  | 0.00  | 0.24  |
| 79132 | LGP2      | -0.04 | 0.09  | 0.00  | 0.09  |
| 79133 | C20orf7   | 0.00  | 0.00  | -0.05 | -0.08 |
| 79143 | LENG4     | 0.00  | 0.09  | 0.00  | 0.43  |
| 79147 | FKRP      | -0.04 | 0.00  | -0.03 | -0.07 |
| 79148 | MMP28     | -0.02 | 0.00  | 0.03  | 0.04  |
| 79154 | MGC4172   | 0.00  | 0.09  | 0.03  | 0.20  |
| 79157 | ET        | 0.04  | 0.00  | 0.03  | 0.08  |
| 79171 | MGC10433  | 0.00  | 0.09  | 0.05  | -0.23 |
| 79183 | C20orf121 | 0.02  | 0.09  | 0.03  | 0.18  |
| 79187 | FSD1      | 0.00  | 0.00  | 0.00  | NaN   |
| 79365 | BHLHB3    | 0.00  | -0.09 | 0.08  | 0.20  |
| 79366 | NSBP1     | -0.04 | 0.00  | -0.08 | 0.02  |
| 79369 | B3GNT4    | 0.02  | 0.00  | 0.00  | -0.37 |
| 79400 | NOX5      | 0.02  | 0.00  | -0.05 | 0.06  |
| 79442 | LRRC2     | -0.04 | 0.00  | 0.00  | 0.16  |
| 79443 | FYCO1     | -0.04 | 0.00  | 0.00  | 0.01  |
| 79584 | FLJ12684  | -0.02 | 0.00  | 0.00  | 0.02  |
| 79587 | FLJ12118  | 0.00  | 0.00  | -0.03 | -0.04 |
| 79590 | MRPL24    | 0.04  | 0.00  | 0.11  | 0.16  |
| 79600 | FLJ21127  | 0.00  | 0.00  | 0.00  | NaN   |
| 79611 | FLJ21963  | 0.00  | 0.00  | 0.00  | NaN   |
| 79640 | FLJ23584  | -0.02 | 0.00  | -0.03 | 0.16  |
| 79657 | FLJ21908  | 0.00  | 0.00  | 0.00  | NaN   |
| 79661 | NEIL1     | 0.00  | 0.00  | 0.00  | NaN   |
| 79701 | FLJ22222  | -0.02 | 0.09  | 0.08  | 0.09  |
| 79703 | FLJ22531  | 0.07  | 0.09  | 0.03  | 0.21  |
| 79716 | NPEPL1    | 0.05  | 0.09  | 0.03  | 0.36  |
| 79719 | FLJ11506  | 0.00  | 0.00  | -0.05 | 0.09  |
| 79723 | SUV39H2   | -0.02 | 0.00  | 0.14  | 0.09  |

|       |          |       |       |       |       |
|-------|----------|-------|-------|-------|-------|
| 79740 | FLJ23049 | 0.02  | 0.00  | 0.00  | 0.12  |
| 79753 | SNIP1    | 0.00  | 0.00  | 0.00  | NaN   |
| 79754 | ASB13    | 0.00  | 0.00  | 0.14  | 0.17  |
| 79767 | ELMO3    | -0.04 | 0.00  | 0.00  | -0.05 |
| 79783 | C7orf10  | -0.02 | 0.00  | 0.03  | 0.07  |
| 79785 | FLJ22655 | 0.00  | -0.09 | 0.05  | -0.09 |
| 79786 | C16orf44 | -0.09 | 0.00  | 0.00  | 0.28  |
| 79800 | ALS2CR8  | 0.02  | 0.00  | 0.00  | 0.10  |
| 79814 | AGMAT    | -0.02 | 0.00  | 0.00  | 0.29  |
| 79833 | GEMIN6   | 0.00  | 0.00  | 0.00  | NaN   |
| 79846 | FLJ21062 | 0.02  | 0.00  | 0.00  | 0.13  |
| 79858 | NEK11    | 0.00  | 0.00  | 0.00  | NaN   |
| 79869 | FLJ12529 | -0.02 | 0.09  | 0.05  | 0.31  |
| 79870 | BAALC    | 0.22  | 0.09  | 0.32  | 0.12  |
| 79887 | FLJ22662 | 0.00  | -0.09 | 0.05  | 0.03  |
| 79890 | RIN3     | -0.02 | 0.00  | 0.03  | 0.29  |
| 79899 | FLJ14213 | 0.04  | 0.00  | -0.03 | -0.10 |
| 79903 | FLJ14154 | 0.04  | 0.00  | 0.00  | 0.19  |
| 79912 | FLJ22028 | 0.00  | -0.09 | 0.05  | 0.30  |
| 79917 | FLJ21687 | -0.04 | 0.00  | -0.05 | 0.02  |
| 79919 | FLJ22671 | 0.00  | 0.00  | 0.00  | NaN   |
| 79953 | C20orf39 | 0.02  | 0.00  | -0.03 | 0.19  |
| 79962 | FLJ13236 | 0.00  | 0.00  | -0.03 | 0.05  |
| 79974 | FLJ21986 | 0.00  | 0.00  | -0.03 | -0.02 |
| 79984 | FLJ21736 | -0.05 | 0.00  | 0.00  | 0.05  |
| 80006 | FLJ13611 | 0.00  | 0.00  | -0.11 | 0.03  |
| 80011 | NIP30    | -0.05 | 0.00  | 0.00  | 0.14  |
| 80146 | UXS1     | 0.00  | 0.00  | 0.00  | NaN   |
| 80157 | FLJ21511 | -0.05 | 0.00  | 0.00  | 0.08  |
| 80196 | RNF34    | 0.02  | 0.00  | 0.00  | 0.34  |
| 80198 | MUS81    | 0.02  | 0.00  | 0.05  | 0.17  |
| 80207 | OPA3     | -0.02 | 0.00  | 0.00  | -0.03 |
| 80221 | FLJ20920 | 0.13  | 0.18  | 0.03  | 0.33  |
| 80271 | ITPKC    | 0.00  | 0.00  | 0.00  | -0.21 |
| 80324 | PUS1     | 0.00  | 0.00  | 0.00  | NaN   |
| 80328 | ULBP2    | 0.00  | 0.00  | -0.03 | 0.18  |
| 80329 | ULBP1    | 0.00  | 0.00  | -0.03 | -0.26 |
| 80351 | TNKS2    | -0.02 | 0.00  | -0.05 | 0.22  |
| 80700 | UBXD1    | 0.00  | 0.00  | 0.00  | NaN   |
| 80704 | SLC19A3  | 0.00  | 0.00  | 0.00  | NaN   |
| 80705 | TSGA10   | 0.02  | 0.00  | 0.00  | -0.02 |
| 80737 | C6orf27  | 0.00  | 0.00  | 0.05  | 0.07  |
| 80765 | STARD5   | 0.00  | 0.00  | -0.03 | -0.08 |
| 80776 | MGC4093  | 0.02  | 0.00  | -0.03 | -0.07 |
| 80781 | COL18A1  | 0.02  | 0.00  | -0.03 | 0.22  |
| 80830 | APOL6    | -0.02 | 0.00  | 0.03  | 0.03  |
| 80831 | APOL5    | -0.02 | 0.00  | 0.03  | 0.04  |

|       |             |       |       |       |       |
|-------|-------------|-------|-------|-------|-------|
| 80833 | APOL3       | -0.02 | 0.00  | 0.03  | -0.09 |
| 80853 | KIAA1718    | 0.02  | 0.00  | 0.00  | 0.07  |
| 80895 | ILKAP       | 0.00  | 0.00  | 0.00  | NaN   |
| 80975 | TMPRSS5     | -0.07 | 0.00  | 0.00  | 0.26  |
| 81025 | GJA10       | 0.00  | 0.09  | 0.00  | 0.07  |
| 81027 | TUBB1       | 0.05  | 0.09  | 0.03  | 0.04  |
| 81029 | WNT5B       | -0.02 | 0.09  | 0.08  | 0.14  |
| 81031 | SLC2A10     | 0.02  | 0.00  | 0.03  | 0.13  |
| 81035 | COLEC12     | 0.02  | -0.09 | 0.00  | 0.11  |
| 81285 | OR51E2      | -0.02 | 0.00  | -0.03 | 0.04  |
| 81490 | PTDSS2      | 0.00  | 0.09  | 0.05  | -0.06 |
| 81491 | GPR63       | 0.00  | 0.09  | -0.03 | -0.02 |
| 81492 | RSHL1       | -0.02 | 0.00  | 0.00  | -0.07 |
| 81539 | SLC38A1     | 0.00  | 0.00  | 0.00  | NaN   |
| 81543 | LRRC3       | 0.00  | 0.00  | 0.00  | 0.04  |
| 81551 | STMN4       | -0.09 | -0.18 | -0.19 | -0.05 |
| 81563 | C1orf21     | 0.07  | 0.00  | 0.03  | 0.28  |
| 81566 | C12orf22    | 0.02  | 0.00  | -0.03 | 0.19  |
| 81578 | COL21A1     | -0.04 | 0.00  | 0.08  | 0.05  |
| 81620 | CDT1        | 0.00  | 0.09  | 0.11  | 0.12  |
| 81622 | UNC93B1     | 0.07  | 0.09  | 0.03  | 0.21  |
| 81623 | DEFB126     | 0.02  | 0.00  | -0.03 | -0.07 |
| 81624 | DIAPH3      | -0.07 | 0.00  | -0.08 | 0.01  |
| 81626 | C1orf14     | 0.07  | 0.00  | 0.03  | -0.12 |
| 81627 | C1orf25     | 0.05  | 0.00  | 0.03  | 0.09  |
| 81691 | LOC81691    | 0.02  | 0.00  | 0.00  | 0.13  |
| 81693 | AMN         | 0.00  | 0.00  | -0.03 | 0.00  |
| 81696 | OR5V1       | 0.00  | 0.00  | 0.05  | 0.00  |
| 81792 | ADAMTS12    | 0.02  | 0.27  | 0.00  | -0.18 |
| 81797 | OR12D3      | 0.00  | 0.00  | 0.05  | -0.13 |
| 81831 | NETO2       | -0.11 | 0.09  | 0.03  | 0.18  |
| 81833 | SPACA1      | -0.02 | 0.00  | -0.05 | -0.01 |
| 81876 | RAB1B       | 0.09  | 0.00  | 0.03  | 0.30  |
| 83442 | SH3BGRL3    | 0.00  | 0.09  | 0.00  | 0.15  |
| 83452 | RAB33B      | 0.00  | 0.00  | 0.00  | NaN   |
| 83481 | EPPK1       | 0.16  | 0.00  | 0.35  | 0.17  |
| 83483 | PLVAP       | 0.04  | 0.00  | 0.00  | 0.06  |
| 83660 | TLN2        | 0.02  | 0.00  | -0.05 | 0.09  |
| 83737 | ITCH        | 0.00  | 0.00  | 0.00  | NaN   |
| 83988 | NCALD       | 0.22  | 0.09  | 0.32  | 0.25  |
| 83990 | BRIP1       | 0.16  | 0.18  | 0.03  | 0.12  |
| 84060 | DKFZP564O05 | 0.02  | 0.00  | 0.08  | 0.50  |
| 84107 | ZIC4        | 0.02  | 0.00  | -0.03 | -0.12 |
| 84148 | MYST1       | 0.04  | 0.09  | 0.00  | 0.30  |
| 84561 | SLC12A8     | 0.00  | 0.00  | -0.03 | -0.12 |
| 84612 | PARD6B      | 0.07  | 0.09  | 0.05  | 0.25  |
| 84658 | EMR3        | 0.02  | 0.00  | 0.00  | 0.05  |



|        |          |       |       |       |       |
|--------|----------|-------|-------|-------|-------|
| 84752  | MGC4655  | -0.04 | 0.00  | 0.00  | 0.11  |
| 84790  | TUBA6    | 0.00  | 0.00  | -0.03 | 0.02  |
| 84928  | FLJ14803 | 0.02  | 0.00  | 0.00  | 0.08  |
| 85359  | DGCR6L   | -0.02 | 0.00  | 0.05  | 0.15  |
| 85363  | TRIM5    | -0.02 | 0.00  | -0.03 | -0.01 |
| 85477  | SCIN     | -0.02 | 0.00  | 0.00  | -0.03 |
| 86722  | GREB1    | -0.02 | 0.00  | 0.00  | -0.07 |
| 89781  | HPS4     | -0.05 | -0.09 | 0.03  | 0.07  |
| 89870  | TRIM15   | 0.00  | 0.00  | 0.05  | -0.05 |
| 89874  | SLC25A21 | 0.02  | 0.00  | 0.00  | -0.02 |
| 89910  | UBE3B    | 0.00  | 0.00  | 0.00  | NaN   |
| 90634  | CG018    | -0.05 | 0.00  | -0.08 | 0.15  |
| 90665  | TBL1Y    | 0.00  | 0.00  | -0.03 | -0.16 |
| 91754  | NEK9     | -0.02 | 0.00  | 0.00  | 0.04  |
| 91949  | COG7     | 0.02  | 0.00  | 0.00  | 0.16  |
| 91977  | MYOZ3    | 0.00  | 0.00  | 0.00  | NaN   |
| 94009  | SERHL    | 0.00  | 0.00  | -0.03 | 0.19  |
| 94104  | C21orf66 | 0.00  | 0.00  | -0.03 | 0.14  |
| 112399 | EGLN3    | 0.04  | 0.09  | 0.00  | 0.04  |
| 113791 | MGC17330 | 0.00  | 0.00  | 0.05  | 0.15  |
| 114049 | WBSCR22  | 0.02  | 0.00  | 0.05  | 0.22  |
| 114088 | TRIM9    | 0.02  | 0.00  | 0.00  | -0.03 |
| 114625 | ERMAP    | 0.02  | 0.00  | 0.00  | 0.04  |
| 114876 | OSBPL1A  | 0.00  | -0.09 | 0.03  | 0.10  |
| 114881 | OSBPL7   | 0.02  | 0.18  | 0.00  | 0.32  |
| 114882 | OSBPL8   | -0.02 | 0.00  | 0.00  | 0.12  |
| 114883 | OSBPL9   | 0.00  | 0.00  | -0.03 | -0.04 |
| 114884 | OSBPL10  | 0.02  | 0.00  | -0.05 | 0.23  |
| 114885 | OSBPL11  | 0.00  | 0.00  | -0.03 | 0.19  |
| 114897 | C1QTNF1  | 0.02  | 0.18  | 0.03  | 0.21  |
| 114899 | C1QTNF3  | 0.02  | 0.27  | 0.00  | 0.13  |
| 116039 | OSR2     | 0.16  | 0.18  | 0.27  | -0.01 |
| 116832 | RPL39L   | 0.04  | 0.00  | 0.03  | 0.28  |
| 116984 | CENTD1   | -0.05 | -0.09 | -0.05 | 0.09  |
| 116985 | CENTD2   | 0.00  | 0.09  | 0.00  | 0.34  |
| 116986 | CENTG1   | 0.02  | 0.09  | 0.00  | -0.14 |
| 116987 | CENTG2   | 0.00  | 0.00  | 0.00  | NaN   |
| 117246 | FTSJ3    | 0.16  | 0.27  | 0.03  | 0.64  |
| 117247 | SLC16A10 | 0.02  | 0.00  | 0.05  | 0.07  |
| 140545 | RNF32    | 0.02  | 0.00  | -0.03 | 0.01  |
| 140803 | TRPM6    | -0.02 | 0.00  | 0.00  | 0.00  |
| 142684 | RAB40A   | -0.05 | 0.00  | -0.08 | -0.12 |
| 154796 | AMOT     | -0.05 | 0.00  | -0.08 | 0.06  |
| 171558 | PTCRA    | 0.00  | 0.00  | 0.08  | 0.00  |
| 192683 | SCAMP5   | 0.00  | 0.00  | 0.00  | NaN   |

## Chin et al. dataset

| Gene_no | Gene_name | Average_CNA_Score_ER | Average_CNA_Score_HER2 | Average_CNA_Score_TN | Overall_Correlation |
|---------|-----------|----------------------|------------------------|----------------------|---------------------|
| 2       | A2M       | 0.02                 | 0.00                   | 0.15                 | -0.05               |
| 9       | NAT1      | 0.00                 | 0.00                   | 0.00                 | NaN                 |
| 10      | NAT2      | 0.00                 | 0.00                   | 0.00                 | NaN                 |
| 12      | SERPINA3  | 0.00                 | 0.00                   | 0.00                 | NaN                 |
| 13      | AADAC     | 0.00                 | 0.00                   | 0.00                 | NaN                 |
| 14      | AAMP      | 0.04                 | 0.00                   | 0.00                 | 0.06                |
| 15      | AANAT     | 0.00                 | 0.14                   | 0.05                 | 0.47                |
| 16      | AARS      | 0.02                 | 0.00                   | 0.00                 | 0.05                |
| 18      | ABAT      | 0.00                 | 0.00                   | 0.00                 | NaN                 |
| 19      | ABCA1     | 0.02                 | 0.00                   | 0.10                 | 0.35                |
| 21      | ABCA3     | 0.18                 | 0.00                   | 0.10                 | 0.12                |
| 23      | ABCF1     | 0.04                 | 0.14                   | 0.05                 | 0.09                |
| 24      | ABCA4     | 0.00                 | 0.00                   | 0.00                 | NaN                 |
| 25      | ABL1      | 0.04                 | 0.00                   | 0.00                 | -0.06               |
| 26      | ABP1      | 0.02                 | 0.00                   | 0.00                 | 0.29                |
| 27      | ABL2      | 0.04                 | 0.00                   | 0.10                 | 0.05                |
| 28      | ABO       | 0.04                 | 0.00                   | 0.00                 | -0.08               |
| 29      | ABR       | 0.02                 | 0.00                   | 0.00                 | 0.11                |
| 30      | ACAA1     | 0.00                 | 0.00                   | 0.15                 | 0.22                |
| 31      | ACACA     | 0.06                 | 0.00                   | 0.00                 | -0.01               |
| 32      | ACACB     | 0.02                 | 0.00                   | 0.00                 | -0.18               |
| 33      | ACADL     | 0.02                 | 0.00                   | 0.05                 | 0.00                |
| 34      | ACADM     | 0.02                 | 0.00                   | 0.05                 | -0.20               |
| 35      | ACADS     | 0.02                 | 0.00                   | 0.10                 | 0.10                |
| 36      | ACADSB    | 0.04                 | 0.00                   | 0.05                 | -0.07               |
| 37      | ACADVL    | 0.00                 | 0.00                   | 0.00                 | NaN                 |
| 38      | ACAT1     | 0.02                 | 0.00                   | 0.00                 | 0.08                |
| 39      | ACAT2     | 0.04                 | 0.00                   | 0.05                 | -0.02               |
| 40      | ACCN1     | 0.04                 | 0.00                   | 0.05                 | -0.08               |
| 41      | ACCN2     | 0.02                 | 0.00                   | 0.00                 | 0.08                |
| 43      | ACHE      | 0.00                 | 0.00                   | 0.00                 | NaN                 |
| 47      | ACLY      | 0.02                 | 0.86                   | 0.05                 | 0.24                |
| 48      | ACO1      | 0.00                 | 0.00                   | 0.15                 | 0.11                |
| 50      | ACO2      | 0.00                 | 0.14                   | 0.00                 | -0.09               |
| 51      | ACOX1     | 0.02                 | 0.14                   | 0.05                 | 0.32                |
| 52      | ACP1      | 0.20                 | 0.14                   | 0.35                 | 0.13                |
| 53      | ACP2      | 0.02                 | 0.00                   | 0.00                 | -0.15               |
| 54      | ACP5      | 0.02                 | 0.00                   | 0.00                 | 0.05                |
| 55      | ACPP      | 0.00                 | 0.00                   | 0.10                 | -0.12               |
| 56      | ACRV1     | 0.02                 | 0.00                   | 0.00                 | 0.02                |
| 58      | ACTA1     | 0.00                 | 0.00                   | 0.05                 | 0.00                |
| 59      | ACTA2     | 0.02                 | 0.00                   | 0.05                 | 0.04                |
| 60      | ACTB      | 0.00                 | 0.00                   | 0.00                 | NaN                 |

|     |           |      |      |      |       |
|-----|-----------|------|------|------|-------|
| 71  | ACTG1     | 0.00 | 0.00 | 0.00 | NaN   |
| 72  | ACTG2     | 0.00 | 0.00 | 0.05 | -0.06 |
| 81  | ACTN4     | 0.00 | 0.00 | 0.00 | NaN   |
| 87  | ACTN1     | 0.02 | 0.00 | 0.00 | 0.12  |
| 88  | ACTN2     | 0.00 | 0.00 | 0.00 | NaN   |
| 89  | ACTN3     | 0.04 | 0.00 | 0.05 | 0.07  |
| 90  | ACVR1     | 0.00 | 0.00 | 0.00 | NaN   |
| 91  | ACVR1B    | 0.00 | 0.00 | 0.00 | NaN   |
| 93  | ACVR2B    | 0.02 | 0.00 | 0.05 | -0.07 |
| 94  | ACVRL1    | 0.00 | 0.00 | 0.00 | NaN   |
| 95  | ACY1      | 0.00 | 0.00 | 0.10 | -0.03 |
| 97  | ACYP1     | 0.00 | 0.00 | 0.00 | NaN   |
| 98  | ACYP2     | 0.02 | 0.00 | 0.05 | 0.08  |
| 100 | ADA       | 0.02 | 0.00 | 0.00 | -0.12 |
| 101 | ADAM8     | 0.00 | 0.00 | 0.00 | NaN   |
| 102 | ADAM10    | 0.00 | 0.00 | 0.00 | NaN   |
| 103 | ADAR      | 0.04 | 0.00 | 0.15 | 0.12  |
| 104 | ADARB1    | 0.00 | 0.00 | 0.05 | 0.10  |
| 107 | ADCY1     | 0.00 | 0.00 | 0.00 | NaN   |
| 108 | ADCY2     | 0.00 | 0.00 | 0.00 | NaN   |
| 109 | ADCY3     | 0.00 | 0.00 | 0.00 | NaN   |
| 112 | ADCY6     | 0.02 | 0.00 | 0.00 | 0.06  |
| 113 | ADCY7     | 0.08 | 0.00 | 0.05 | 0.02  |
| 114 | ADCY8     | 0.10 | 0.14 | 0.00 | -0.06 |
| 115 | ADCY9     | 0.00 | 0.00 | 0.00 | NaN   |
| 116 | ADCYAP1   | 0.00 | 0.00 | 0.00 | NaN   |
| 117 | ADCYAP1R1 | 0.00 | 0.00 | 0.00 | NaN   |
| 118 | ADD1      | 0.00 | 0.29 | 0.00 | 0.08  |
| 119 | ADD2      | 0.00 | 0.00 | 0.05 | 0.00  |
| 120 | ADD3      | 0.00 | 0.14 | 0.00 | 0.02  |
| 123 | ADFP      | 0.02 | 0.00 | 0.05 | -0.05 |
| 124 | ADH1A     | 0.00 | 0.00 | 0.00 | NaN   |
| 125 | ADH1B     | 0.00 | 0.00 | 0.00 | NaN   |
| 126 | ADH1C     | 0.00 | 0.00 | 0.00 | NaN   |
| 128 | ADH5      | 0.00 | 0.00 | 0.00 | NaN   |
| 130 | ADH6      | 0.00 | 0.00 | 0.00 | NaN   |
| 131 | ADH7      | 0.00 | 0.00 | 0.00 | NaN   |
| 132 | ADK       | 0.02 | 0.00 | 0.00 | 0.23  |
| 133 | ADM       | 0.00 | 0.00 | 0.00 | NaN   |
| 134 | ADORA1    | 0.00 | 0.00 | 0.00 | NaN   |
| 135 | ADORA2A   | 0.00 | 0.14 | 0.05 | -0.12 |
| 136 | ADORA2B   | 0.00 | 0.00 | 0.00 | NaN   |
| 140 | ADORA3    | 0.00 | 0.00 | 0.00 | NaN   |
| 141 | ADPRH     | 0.00 | 0.00 | 0.10 | 0.10  |
| 146 | ADRA1D    | 0.00 | 0.00 | 0.05 | -0.13 |
| 147 | ADRA1B    | 0.00 | 0.00 | 0.00 | NaN   |
| 148 | ADRA1A    | 0.02 | 0.00 | 0.00 | 0.10  |

|     |         |      |      |      |       |
|-----|---------|------|------|------|-------|
| 150 | ADRA2A  | 0.00 | 0.14 | 0.00 | 0.07  |
| 151 | ADRA2B  | 0.04 | 0.00 | 0.05 | -0.13 |
| 152 | ADRA2C  | 0.00 | 0.00 | 0.00 | NaN   |
| 153 | ADRB1   | 0.04 | 0.00 | 0.05 | -0.02 |
| 154 | ADRB2   | 0.02 | 0.14 | 0.00 | -0.07 |
| 155 | ADRB3   | 0.12 | 0.14 | 0.05 | -0.12 |
| 156 | ADRBK1  | 0.04 | 0.00 | 0.00 | 0.58  |
| 157 | ADRBK2  | 0.00 | 0.14 | 0.05 | 0.03  |
| 158 | ADSL    | 0.00 | 0.14 | 0.00 | 0.07  |
| 161 | AP2A2   | 0.02 | 0.00 | 0.05 | -0.03 |
| 162 | AP1B1   | 0.00 | 0.14 | 0.05 | -0.01 |
| 163 | AP2B1   | 0.06 | 0.00 | 0.00 | 0.25  |
| 164 | AP1G1   | 0.00 | 0.00 | 0.05 | 0.03  |
| 165 | AEBP1   | 0.00 | 0.00 | 0.00 | NaN   |
| 166 | AES     | 0.00 | 0.00 | 0.00 | NaN   |
| 173 | AFM     | 0.02 | 0.00 | 0.00 | 0.01  |
| 174 | AFP     | 0.02 | 0.00 | 0.00 | 0.04  |
| 175 | AGA     | 0.00 | 0.00 | 0.00 | NaN   |
| 177 | AGER    | 0.02 | 0.00 | 0.05 | 0.14  |
| 178 | AGL     | 0.02 | 0.00 | 0.00 | -0.09 |
| 181 | AGRP    | 0.02 | 0.00 | 0.00 | 0.02  |
| 182 | JAG1    | 0.00 | 0.00 | 0.05 | 0.63  |
| 183 | AGT     | 0.00 | 0.00 | 0.05 | -0.07 |
| 185 | AGTR1   | 0.00 | 0.00 | 0.00 | NaN   |
| 189 | AGXT    | 0.08 | 0.43 | 0.10 | 0.03  |
| 191 | AHCY    | 0.02 | 0.00 | 0.05 | -0.23 |
| 195 | AHNAK   | 0.00 | 0.00 | 0.05 | -0.11 |
| 196 | AHR     | 0.02 | 0.00 | 0.05 | 0.01  |
| 197 | AHSG    | 0.02 | 0.14 | 0.00 | -0.04 |
| 199 | AIF1    | 0.02 | 0.00 | 0.05 | 0.12  |
| 202 | AIM1    | 0.04 | 0.00 | 0.00 | 0.20  |
| 203 | AK1     | 0.02 | 0.00 | 0.00 | -0.05 |
| 204 | AK2     | 0.00 | 0.00 | 0.00 | NaN   |
| 205 | AK3     | 0.00 | 0.00 | 0.00 | NaN   |
| 207 | AKT1    | 0.02 | 0.00 | 0.10 | -0.02 |
| 208 | AKT2    | 0.06 | 0.00 | 0.05 | 0.03  |
| 210 | ALAD    | 0.00 | 0.00 | 0.00 | NaN   |
| 211 | ALAS1   | 0.00 | 0.00 | 0.10 | -0.10 |
| 214 | ALCAM   | 0.02 | 0.14 | 0.05 | -0.20 |
| 216 | ALDH1A1 | 0.00 | 0.00 | 0.00 | NaN   |
| 217 | ALDH2   | 0.00 | 0.00 | 0.00 | NaN   |
| 218 | ALDH3A1 | 0.10 | 0.00 | 0.05 | 0.15  |
| 219 | ALDH1B1 | 0.14 | 0.00 | 0.15 | -0.15 |
| 220 | ALDH1A3 | 0.16 | 0.00 | 0.10 | -0.10 |
| 221 | ALDH3B1 | 0.04 | 0.00 | 0.05 | 0.22  |
| 222 | ALDH3B2 | 0.04 | 0.00 | 0.05 | 0.29  |
| 223 | ALDH9A1 | 0.02 | 0.00 | 0.00 | -0.24 |

|     |         |      |      |      |       |
|-----|---------|------|------|------|-------|
| 224 | ALDH3A2 | 0.02 | 0.00 | 0.00 | 0.11  |
| 225 | ABCD2   | 0.00 | 0.00 | 0.35 | -0.10 |
| 226 | ALDOA   | 0.02 | 0.00 | 0.00 | -0.07 |
| 229 | ALDOB   | 0.04 | 0.00 | 0.00 | 0.22  |
| 230 | ALDOC   | 0.10 | 0.00 | 0.05 | 0.16  |
| 231 | AKR1B1  | 0.00 | 0.00 | 0.05 | 0.03  |
| 238 | ALK     | 0.00 | 0.00 | 0.00 | NaN   |
| 239 | ALOX12  | 0.00 | 0.00 | 0.00 | NaN   |
| 240 | ALOX5   | 0.02 | 0.00 | 0.10 | -0.03 |
| 241 | ALOX5AP | 0.04 | 0.14 | 0.00 | -0.20 |
| 242 | ALOX12B | 0.00 | 0.00 | 0.00 | NaN   |
| 244 | ANXA8   | 0.02 | 0.00 | 0.10 | 0.04  |
| 246 | ALOX15  | 0.04 | 0.00 | 0.10 | -0.05 |
| 247 | ALOX15B | 0.00 | 0.00 | 0.00 | NaN   |
| 248 | ALPI    | 0.00 | 0.00 | 0.05 | -0.01 |
| 249 | ALPL    | 0.02 | 0.00 | 0.00 | -0.05 |
| 250 | ALPP    | 0.00 | 0.00 | 0.05 | 0.01  |
| 251 | ALPPL2  | 0.00 | 0.00 | 0.05 | -0.02 |
| 257 | ALX3    | 0.00 | 0.00 | 0.00 | NaN   |
| 258 | AMBN    | 0.00 | 0.14 | 0.00 | 0.14  |
| 259 | AMBP    | 0.00 | 0.00 | 0.00 | NaN   |
| 262 | AMD1    | 0.02 | 0.00 | 0.10 | 0.53  |
| 267 | AMFR    | 0.02 | 0.00 | 0.00 | -0.06 |
| 268 | AMH     | 0.02 | 0.00 | 0.05 | -0.16 |
| 269 | AMHR2   | 0.00 | 0.00 | 0.00 | NaN   |
| 270 | AMPD1   | 0.08 | 0.00 | 0.10 | 0.02  |
| 271 | AMPD2   | 0.00 | 0.00 | 0.00 | NaN   |
| 272 | AMPD3   | 0.00 | 0.00 | 0.00 | NaN   |
| 273 | AMPH    | 0.00 | 0.00 | 0.00 | NaN   |
| 274 | BIN1    | 0.00 | 0.00 | 0.10 | 0.12  |
| 275 | AMT     | 0.06 | 0.00 | 0.05 | 0.21  |
| 276 | AMY1A   | 0.06 | 0.00 | 0.20 | -0.01 |
| 283 | ANG     | 0.02 | 0.00 | 0.00 | -0.03 |
| 284 | ANGPT1  | 0.12 | 0.00 | 0.25 | 0.07  |
| 285 | ANGPT2  | 0.02 | 0.14 | 0.10 | 0.01  |
| 286 | ANK1    | 0.04 | 0.00 | 0.00 | 0.68  |
| 287 | ANK2    | 0.00 | 0.00 | 0.05 | -0.11 |
| 288 | ANK3    | 0.06 | 0.00 | 0.05 | 0.01  |
| 290 | ANPEP   | 0.00 | 0.00 | 0.00 | NaN   |
| 291 | SLC25A4 | 0.00 | 0.00 | 0.00 | NaN   |
| 301 | ANXA1   | 0.00 | 0.00 | 0.00 | NaN   |
| 302 | ANXA2   | 0.00 | 0.00 | 0.05 | -0.19 |
| 306 | ANXA3   | 0.00 | 0.00 | 0.00 | NaN   |
| 307 | ANXA4   | 0.00 | 0.14 | 0.00 | 0.10  |
| 308 | ANXA5   | 0.00 | 0.14 | 0.05 | 0.05  |
| 309 | ANXA6   | 0.00 | 0.14 | 0.00 | 0.22  |
| 310 | ANXA7   | 0.00 | 0.00 | 0.00 | NaN   |

|     |         |      |      |      |       |
|-----|---------|------|------|------|-------|
| 311 | ANXA11  | 0.06 | 0.14 | 0.05 | 0.23  |
| 312 | ANXA13  | 0.08 | 0.00 | 0.00 | -0.18 |
| 313 | AOAH    | 0.02 | 0.00 | 0.00 | -0.16 |
| 314 | AOC2    | 0.02 | 0.86 | 0.05 | 0.09  |
| 316 | AOX1    | 0.00 | 0.00 | 0.05 | -0.02 |
| 317 | APAF1   | 0.04 | 0.14 | 0.05 | 0.19  |
| 318 | NUDT2   | 0.04 | 0.00 | 0.00 | 0.09  |
| 319 | APOF    | 0.00 | 0.00 | 0.00 | NaN   |
| 320 | APBA1   | 0.02 | 0.00 | 0.00 | 0.02  |
| 321 | APBA2   | 0.00 | 0.00 | 0.00 | NaN   |
| 322 | APBB1   | 0.00 | 0.00 | 0.00 | NaN   |
| 323 | APBB2   | 0.00 | 0.00 | 0.05 | -0.13 |
| 324 | APC     | 0.00 | 0.00 | 0.00 | NaN   |
| 325 | APCS    | 0.00 | 0.00 | 0.00 | NaN   |
| 326 | AIRE    | 0.02 | 0.00 | 0.00 | -0.04 |
| 327 | APEH    | 0.06 | 0.00 | 0.05 | 0.00  |
| 329 | BIRC2   | 0.00 | 0.00 | 0.00 | NaN   |
| 330 | BIRC3   | 0.00 | 0.00 | 0.00 | NaN   |
| 332 | BIRC5   | 0.02 | 0.14 | 0.05 | 0.09  |
| 333 | APLP1   | 0.00 | 0.00 | 0.00 | NaN   |
| 334 | APLP2   | 0.02 | 0.00 | 0.00 | 0.04  |
| 335 | APOA1   | 0.02 | 0.00 | 0.00 | -0.06 |
| 336 | APOA2   | 0.00 | 0.00 | 0.00 | NaN   |
| 337 | APOA4   | 0.02 | 0.00 | 0.00 | -0.06 |
| 338 | APOB    | 0.00 | 0.00 | 0.00 | NaN   |
| 339 | APOBEC1 | 0.02 | 0.00 | 0.15 | 0.01  |
| 341 | APOC1   | 0.00 | 0.00 | 0.00 | NaN   |
| 343 | AQP8    | 0.06 | 0.14 | 0.00 | 0.01  |
| 344 | APOC2   | 0.00 | 0.00 | 0.00 | NaN   |
| 345 | APOC3   | 0.02 | 0.00 | 0.00 | -0.08 |
| 346 | APOC4   | 0.00 | 0.00 | 0.00 | NaN   |
| 347 | APOD    | 0.02 | 0.00 | 0.00 | 0.05  |
| 348 | APOE    | 0.00 | 0.00 | 0.00 | NaN   |
| 350 | APOH    | 0.12 | 0.00 | 0.20 | -0.08 |
| 351 | APP     | 0.00 | 0.00 | 0.00 | NaN   |
| 353 | APRT    | 0.00 | 0.00 | 0.10 | 0.10  |
| 354 | KLK3    | 0.00 | 0.00 | 0.00 | NaN   |
| 358 | AQP1    | 0.00 | 0.00 | 0.00 | NaN   |
| 359 | AQP2    | 0.02 | 0.00 | 0.00 | -0.12 |
| 360 | AQP3    | 0.04 | 0.00 | 0.00 | -0.07 |
| 361 | AQP4    | 0.00 | 0.00 | 0.10 | -0.01 |
| 362 | AQP5    | 0.02 | 0.00 | 0.00 | -0.04 |
| 363 | AQP6    | 0.02 | 0.00 | 0.00 | 0.06  |
| 364 | AQP7    | 0.04 | 0.00 | 0.00 | 0.17  |
| 366 | AQP9    | 0.00 | 0.00 | 0.00 | NaN   |
| 368 | ABCC6   | 0.00 | 0.00 | 0.00 | NaN   |
| 372 | ARCN1   | 0.00 | 0.00 | 0.00 | NaN   |

|     |          |      |      |      |       |
|-----|----------|------|------|------|-------|
| 374 | AREG     | 0.00 | 0.00 | 0.05 | -0.12 |
| 375 | ARF1     | 0.00 | 0.00 | 0.05 | 0.14  |
| 377 | ARF3     | 0.02 | 0.00 | 0.00 | 0.05  |
| 378 | ARF4     | 0.02 | 0.00 | 0.00 | -0.07 |
| 381 | ARF5     | 0.02 | 0.00 | 0.00 | 0.03  |
| 382 | ARF6     | 0.00 | 0.00 | 0.00 | NaN   |
| 383 | ARG1     | 0.02 | 0.00 | 0.00 | -0.06 |
| 384 | ARG2     | 0.00 | 0.00 | 0.05 | 0.33  |
| 392 | ARHGAP1  | 0.02 | 0.00 | 0.00 | 0.33  |
| 394 | ARHGAP5  | 0.02 | 0.00 | 0.00 | 0.25  |
| 396 | ARHGDI A | 0.00 | 0.00 | 0.00 | NaN   |
| 397 | ARHGDI B | 0.00 | 0.00 | 0.00 | NaN   |
| 398 | ARHGDI G | 0.18 | 0.00 | 0.10 | 0.04  |
| 400 | ARL1     | 0.00 | 0.00 | 0.00 | NaN   |
| 402 | ARL2     | 0.02 | 0.00 | 0.00 | -0.05 |
| 403 | ARL3     | 0.02 | 0.00 | 0.00 | -0.06 |
| 405 | ARNT     | 0.02 | 0.00 | 0.10 | 0.10  |
| 406 | ARNTL    | 0.00 | 0.00 | 0.00 | NaN   |
| 408 | ARRB1    | 0.02 | 0.14 | 0.00 | 0.04  |
| 409 | ARRB2    | 0.04 | 0.00 | 0.10 | 0.12  |
| 411 | ARSB     | 0.00 | 0.00 | 0.00 | NaN   |
| 417 | ART1     | 0.00 | 0.00 | 0.05 | -0.09 |
| 419 | ART3     | 0.00 | 0.00 | 0.00 | NaN   |
| 421 | ARVCF    | 0.06 | 0.14 | 0.15 | -0.01 |
| 429 | ASCL1    | 0.00 | 0.00 | 0.00 | NaN   |
| 430 | ASCL2    | 0.00 | 0.00 | 0.00 | NaN   |
| 432 | ASGR1    | 0.00 | 0.00 | 0.00 | NaN   |
| 433 | ASGR2    | 0.00 | 0.00 | 0.00 | NaN   |
| 434 | ASIP     | 0.02 | 0.00 | 0.05 | -0.03 |
| 435 | ASL      | 0.04 | 0.00 | 0.00 | -0.01 |
| 439 | ASNA1    | 0.06 | 0.14 | 0.00 | 0.12  |
| 440 | ASNS     | 0.00 | 0.14 | 0.05 | 0.11  |
| 443 | ASPA     | 0.04 | 0.00 | 0.10 | -0.11 |
| 444 | ASPH     | 0.02 | 0.00 | 0.00 | -0.03 |
| 462 | SERPINC1 | 0.04 | 0.00 | 0.00 | 0.04  |
| 466 | ATF1     | 0.02 | 0.00 | 0.00 | 0.03  |
| 467 | ATF3     | 0.02 | 0.00 | 0.15 | -0.05 |
| 468 | ATF4     | 0.00 | 0.14 | 0.00 | 0.05  |
| 471 | ATIC     | 0.02 | 0.00 | 0.00 | 0.02  |
| 472 | ATM      | 0.02 | 0.00 | 0.00 | 0.12  |
| 473 | RERE     | 0.00 | 0.00 | 0.00 | NaN   |
| 474 | ATOH1    | 0.04 | 0.00 | 0.05 | -0.06 |
| 475 | ATOX1    | 0.00 | 0.14 | 0.00 | 0.08  |
| 476 | ATP1A1   | 0.08 | 0.00 | 0.10 | -0.02 |
| 477 | ATP1A2   | 0.00 | 0.00 | 0.00 | NaN   |
| 478 | ATP1A3   | 0.00 | 0.00 | 0.05 | 0.11  |
| 479 | ATP12A   | 0.06 | 0.00 | 0.00 | 0.14  |

|     |          |      |      |      |       |
|-----|----------|------|------|------|-------|
| 481 | ATP1B1   | 0.00 | 0.00 | 0.10 | 0.13  |
| 482 | ATP1B2   | 0.00 | 0.00 | 0.00 | NaN   |
| 483 | ATP1B3   | 0.02 | 0.00 | 0.00 | -0.20 |
| 486 | FXYD2    | 0.00 | 0.00 | 0.00 | NaN   |
| 487 | ATP2A1   | 0.06 | 0.14 | 0.00 | 0.26  |
| 488 | ATP2A2   | 0.02 | 0.00 | 0.00 | -0.19 |
| 489 | ATP2A3   | 0.04 | 0.00 | 0.10 | 0.00  |
| 490 | ATP2B1   | 0.00 | 0.00 | 0.00 | NaN   |
| 491 | ATP2B2   | 0.02 | 0.00 | 0.05 | 0.29  |
| 493 | ATP2B4   | 0.00 | 0.00 | 0.00 | NaN   |
| 495 | ATP4A    | 0.00 | 0.00 | 0.00 | NaN   |
| 498 | ATP5A1   | 0.02 | 0.00 | 0.00 | 0.00  |
| 501 | ALDH7A1  | 0.00 | 0.00 | 0.00 | NaN   |
| 506 | ATP5B    | 0.00 | 0.00 | 0.00 | NaN   |
| 513 | ATP5D    | 0.02 | 0.00 | 0.05 | 0.04  |
| 514 | ATP5E    | 0.12 | 0.00 | 0.00 | 0.27  |
| 515 | ATP5F1   | 0.06 | 0.14 | 0.00 | -0.07 |
| 516 | ATP5G1   | 0.04 | 0.00 | 0.05 | 0.01  |
| 517 | ATP5G2   | 0.00 | 0.00 | 0.00 | NaN   |
| 518 | ATP5G3   | 0.00 | 0.00 | 0.05 | 0.10  |
| 522 | ATP5J    | 0.02 | 0.00 | 0.05 | 0.07  |
| 525 | ATP6V1B1 | 0.00 | 0.00 | 0.05 | -0.18 |
| 526 | ATP6V1B2 | 0.00 | 0.00 | 0.00 | NaN   |
| 527 | ATP6V0C  | 0.02 | 0.00 | 0.00 | 0.13  |
| 528 | ATP6V1C1 | 0.12 | 0.00 | 0.25 | 0.36  |
| 533 | ATP6V0B  | 0.02 | 0.00 | 0.05 | 0.23  |
| 534 | ATP6V1G2 | 0.04 | 0.14 | 0.05 | -0.13 |
| 535 | ATP6V0A1 | 0.02 | 0.86 | 0.05 | -0.19 |
| 539 | ATP5O    | 0.00 | 0.00 | 0.00 | NaN   |
| 540 | ATP7B    | 0.04 | 0.00 | 0.10 | -0.16 |
| 545 | ATR      | 0.02 | 0.00 | 0.00 | -0.03 |
| 549 | AUH      | 0.00 | 0.00 | 0.00 | NaN   |
| 550 | AUP1     | 0.00 | 0.00 | 0.05 | -0.13 |
| 551 | AVP      | 0.00 | 0.00 | 0.00 | NaN   |
| 552 | AVPR1A   | 0.04 | 0.00 | 0.00 | -0.01 |
| 553 | AVPR1B   | 0.02 | 0.00 | 0.05 | -0.02 |
| 558 | AXL      | 0.00 | 0.00 | 0.05 | 0.15  |
| 563 | AZGP1    | 0.02 | 0.00 | 0.00 | 0.01  |
| 566 | AZU1     | 0.06 | 0.00 | 0.15 | 0.02  |
| 567 | B2M      | 0.02 | 0.00 | 0.05 | 0.25  |
| 570 | BAAT     | 0.04 | 0.00 | 0.00 | -0.09 |
| 571 | BACH1    | 0.02 | 0.00 | 0.00 | 0.09  |
| 572 | BAD      | 0.02 | 0.00 | 0.00 | 0.07  |
| 573 | BAG1     | 0.04 | 0.00 | 0.00 | 0.03  |
| 575 | BAI1     | 0.10 | 0.00 | 0.15 | -0.14 |
| 576 | BAI2     | 0.00 | 0.14 | 0.00 | -0.06 |
| 577 | BAI3     | 0.12 | 0.00 | 0.05 | 0.08  |



|     |          |      |      |      |       |
|-----|----------|------|------|------|-------|
| 578 | BAK1     | 0.02 | 0.00 | 0.05 | 0.15  |
| 580 | BARD1    | 0.02 | 0.00 | 0.00 | 0.11  |
| 581 | BAX      | 0.06 | 0.00 | 0.05 | -0.01 |
| 585 | BBS4     | 0.00 | 0.00 | 0.05 | -0.04 |
| 586 | BCAT1    | 0.06 | 0.00 | 0.00 | 0.10  |
| 587 | BCAT2    | 0.06 | 0.00 | 0.05 | 0.14  |
| 590 | BCHE     | 0.00 | 0.00 | 0.00 | NaN   |
| 593 | BCKDHA   | 0.00 | 0.00 | 0.05 | 0.27  |
| 594 | BCKDHB   | 0.10 | 0.00 | 0.20 | 0.02  |
| 595 | CCND1    | 0.12 | 0.00 | 0.10 | 0.51  |
| 596 | BCL2     | 0.02 | 0.00 | 0.00 | 0.35  |
| 597 | BCL2A1   | 0.02 | 0.00 | 0.00 | -0.05 |
| 598 | BCL2L1   | 0.04 | 0.00 | 0.15 | 0.16  |
| 599 | BCL2L2   | 0.02 | 0.14 | 0.10 | 0.00  |
| 602 | BCL3     | 0.00 | 0.00 | 0.00 | NaN   |
| 604 | BCL6     | 0.00 | 0.14 | 0.00 | -0.05 |
| 605 | BCL7A    | 0.02 | 0.00 | 0.10 | 0.07  |
| 607 | BCL9     | 0.02 | 0.00 | 0.00 | 0.09  |
| 608 | TNFRSF17 | 0.00 | 0.00 | 0.00 | NaN   |
| 610 | HCN2     | 0.06 | 0.00 | 0.15 | -0.02 |
| 611 | OPN1SW   | 0.00 | 0.00 | 0.05 | -0.04 |
| 613 | BCR      | 0.00 | 0.14 | 0.00 | 0.04  |
| 617 | BCS1L    | 0.04 | 0.00 | 0.00 | 0.14  |
| 623 | BDKRB1   | 0.00 | 0.00 | 0.05 | -0.09 |
| 624 | BDKRB2   | 0.00 | 0.00 | 0.05 | -0.09 |
| 627 | BDNF     | 0.02 | 0.00 | 0.00 | -0.03 |
| 631 | BFSP1    | 0.00 | 0.00 | 0.00 | NaN   |
| 632 | BGLAP    | 0.04 | 0.14 | 0.05 | -0.07 |
| 634 | CEACAM1  | 0.00 | 0.00 | 0.00 | NaN   |
| 635 | BHMT     | 0.00 | 0.00 | 0.00 | NaN   |
| 636 | BICD1    | 0.02 | 0.00 | 0.00 | 0.00  |
| 637 | BID      | 0.02 | 0.14 | 0.20 | 0.13  |
| 638 | BIK      | 0.00 | 0.14 | 0.05 | 0.02  |
| 640 | BLK      | 0.00 | 0.00 | 0.00 | NaN   |
| 641 | BLM      | 0.02 | 0.00 | 0.00 | 0.38  |
| 642 | BLMH     | 0.10 | 0.00 | 0.05 | 0.03  |
| 644 | BLVRA    | 0.00 | 0.00 | 0.00 | NaN   |
| 645 | BLVRB    | 0.00 | 0.00 | 0.05 | 0.15  |
| 648 | BMI1     | 0.00 | 0.00 | 0.00 | NaN   |
| 649 | BMP1     | 0.00 | 0.00 | 0.05 | 0.25  |
| 650 | BMP2     | 0.00 | 0.00 | 0.00 | NaN   |
| 651 | BMP3     | 0.02 | 0.00 | 0.00 | -0.13 |
| 652 | BMP4     | 0.00 | 0.00 | 0.00 | NaN   |
| 653 | BMP5     | 0.06 | 0.14 | 0.05 | -0.11 |
| 654 | BMP6     | 0.00 | 0.00 | 0.05 | 0.02  |
| 655 | BMP7     | 0.08 | 0.00 | 0.05 | 0.10  |
| 657 | BMPR1A   | 0.00 | 0.00 | 0.05 | 0.31  |

|     |          |      |      |      |       |
|-----|----------|------|------|------|-------|
| 658 | BMPR1B   | 0.04 | 0.00 | 0.05 | 0.07  |
| 659 | BMPR2    | 0.00 | 0.00 | 0.00 | NaN   |
| 662 | BNIP1    | 0.00 | 0.00 | 0.10 | -0.03 |
| 663 | BNIP2    | 0.00 | 0.00 | 0.00 | NaN   |
| 664 | BNIP3    | 0.00 | 0.00 | 0.05 | -0.01 |
| 665 | BNIP3L   | 0.00 | 0.00 | 0.05 | -0.12 |
| 666 | BOK      | 0.08 | 0.43 | 0.10 | -0.03 |
| 668 | FOXL2    | 0.00 | 0.00 | 0.00 | NaN   |
| 669 | BPGM     | 0.00 | 0.00 | 0.05 | -0.03 |
| 671 | BPI      | 0.02 | 0.00 | 0.00 | 0.11  |
| 672 | BRCA1    | 0.00 | 0.86 | 0.00 | -0.04 |
| 673 | BRAF     | 0.00 | 0.14 | 0.05 | 0.00  |
| 675 | BRCA2    | 0.00 | 0.00 | 0.05 | 0.18  |
| 676 | BRDT     | 0.00 | 0.00 | 0.00 | NaN   |
| 677 | ZFP36L1  | 0.02 | 0.00 | 0.00 | 0.04  |
| 678 | ZFP36L2  | 0.02 | 0.00 | 0.05 | -0.02 |
| 682 | BSG      | 0.06 | 0.00 | 0.15 | 0.06  |
| 683 | BST1     | 0.00 | 0.00 | 0.00 | NaN   |
| 684 | BST2     | 0.04 | 0.00 | 0.00 | 0.34  |
| 685 | BTC      | 0.00 | 0.00 | 0.05 | -0.15 |
| 686 | BTD      | 0.00 | 0.00 | 0.05 | -0.01 |
| 688 | KLF5     | 0.02 | 0.00 | 0.00 | -0.04 |
| 689 | BTF3     | 0.06 | 0.00 | 0.00 | 0.10  |
| 690 | BTF3L1   | 0.02 | 0.00 | 0.00 | -0.06 |
| 694 | BTG1     | 0.00 | 0.00 | 0.00 | NaN   |
| 696 | BTN1A1   | 0.00 | 0.14 | 0.00 | 0.07  |
| 699 | BUB1     | 0.02 | 0.00 | 0.00 | 0.02  |
| 701 | BUB1B    | 0.00 | 0.00 | 0.00 | NaN   |
| 705 | BYSL     | 0.06 | 0.00 | 0.05 | 0.08  |
| 708 | C1QBP    | 0.04 | 0.00 | 0.10 | 0.11  |
| 710 | SERPING1 | 0.00 | 0.00 | 0.00 | NaN   |
| 712 | C1QA     | 0.02 | 0.00 | 0.00 | 0.00  |
| 713 | C1QB     | 0.02 | 0.00 | 0.00 | 0.03  |
| 715 | C1R      | 0.02 | 0.00 | 0.15 | 0.04  |
| 716 | C1S      | 0.02 | 0.00 | 0.15 | -0.02 |
| 717 | C2       | 0.02 | 0.00 | 0.05 | -0.04 |
| 718 | C3       | 0.02 | 0.00 | 0.15 | 0.25  |
| 719 | C3AR1    | 0.02 | 0.00 | 0.15 | 0.10  |
| 720 | C4A      | 0.02 | 0.00 | 0.05 | 0.12  |
| 721 | C4B      | 0.02 | 0.00 | 0.05 | 0.11  |
| 722 | C4BPA    | 0.00 | 0.00 | 0.05 | -0.03 |
| 725 | C4BPB    | 0.00 | 0.00 | 0.05 | 0.02  |
| 726 | CAPN5    | 0.02 | 0.00 | 0.05 | 0.60  |
| 727 | C5       | 0.00 | 0.00 | 0.00 | NaN   |
| 729 | C6       | 0.04 | 0.00 | 0.00 | 0.32  |
| 730 | C7       | 0.04 | 0.00 | 0.00 | 0.28  |
| 731 | C8A      | 0.02 | 0.00 | 0.00 | -0.13 |

|     |          |      |      |      |       |
|-----|----------|------|------|------|-------|
| 732 | C8B      | 0.02 | 0.00 | 0.00 | -0.06 |
| 735 | C9       | 0.04 | 0.00 | 0.00 | 0.26  |
| 738 | C11orf2  | 0.02 | 0.00 | 0.00 | 0.02  |
| 740 | MRPL49   | 0.02 | 0.00 | 0.00 | 0.05  |
| 745 | C11orf9  | 0.00 | 0.00 | 0.05 | -0.06 |
| 746 | C11orf10 | 0.00 | 0.00 | 0.05 | 0.07  |
| 750 | C16orf3  | 0.00 | 0.00 | 0.10 | 0.01  |
| 753 | C18orf1  | 0.08 | 0.14 | 0.10 | 0.12  |
| 754 | PTTG1IP  | 0.00 | 0.00 | 0.05 | -0.28 |
| 755 | C21orf2  | 0.02 | 0.00 | 0.00 | 0.05  |
| 759 | CA1      | 0.06 | 0.00 | 0.15 | -0.05 |
| 760 | CA2      | 0.06 | 0.00 | 0.15 | 0.16  |
| 761 | CA3      | 0.06 | 0.00 | 0.15 | -0.11 |
| 762 | CA4      | 0.10 | 0.00 | 0.05 | 0.14  |
| 763 | CA5A     | 0.00 | 0.00 | 0.10 | -0.05 |
| 765 | CA6      | 0.00 | 0.00 | 0.00 | NaN   |
| 766 | CA7      | 0.02 | 0.00 | 0.00 | -0.08 |
| 767 | CA8      | 0.02 | 0.00 | 0.10 | -0.01 |
| 768 | CA9      | 0.00 | 0.00 | 0.00 | NaN   |
| 770 | CA11     | 0.06 | 0.00 | 0.05 | 0.02  |
| 771 | CA12     | 0.02 | 0.00 | 0.00 | 0.16  |
| 773 | CACNA1A  | 0.00 | 0.14 | 0.05 | -0.03 |
| 775 | CACNA1C  | 0.08 | 0.14 | 0.10 | 0.11  |
| 776 | CACNA1D  | 0.00 | 0.00 | 0.00 | NaN   |
| 777 | CACNA1E  | 0.02 | 0.00 | 0.00 | 0.29  |
| 779 | CACNA1S  | 0.00 | 0.00 | 0.10 | 0.27  |
| 780 | DDR1     | 0.04 | 0.14 | 0.05 | 0.06  |
| 781 | CACNA2D1 | 0.02 | 0.00 | 0.00 | -0.12 |
| 782 | CACNB1   | 0.02 | 0.86 | 0.05 | 0.17  |
| 783 | CACNB2   | 0.00 | 0.00 | 0.05 | 0.00  |
| 784 | CACNB3   | 0.02 | 0.00 | 0.00 | 0.07  |
| 785 | CACNB4   | 0.00 | 0.00 | 0.00 | NaN   |
| 786 | CACNG1   | 0.12 | 0.00 | 0.20 | -0.10 |
| 788 | SLC25A20 | 0.00 | 0.00 | 0.05 | -0.11 |
| 790 | CAD      | 0.00 | 0.00 | 0.00 | NaN   |
| 793 | CALB1    | 0.06 | 0.00 | 0.15 | 0.06  |
| 794 | CALB2    | 0.00 | 0.00 | 0.05 | -0.05 |
| 796 | CALCA    | 0.00 | 0.00 | 0.10 | -0.02 |
| 797 | CALCB    | 0.00 | 0.00 | 0.10 | 0.01  |
| 799 | CALCR    | 0.00 | 0.00 | 0.00 | NaN   |
| 800 | CALD1    | 0.00 | 0.00 | 0.05 | 0.13  |
| 801 | CALM1    | 0.00 | 0.00 | 0.00 | NaN   |
| 805 | CALM2    | 0.00 | 0.00 | 0.00 | NaN   |
| 808 | CALM3    | 0.00 | 0.00 | 0.05 | 0.06  |
| 811 | CALR     | 0.00 | 0.14 | 0.05 | 0.06  |
| 813 | CALU     | 0.00 | 0.00 | 0.05 | 0.15  |
| 814 | CAMK4    | 0.02 | 0.00 | 0.00 | -0.09 |

|     |          |      |      |      |       |
|-----|----------|------|------|------|-------|
| 815 | CAMK2A   | 0.00 | 0.00 | 0.00 | NaN   |
| 816 | CAMK2B   | 0.00 | 0.00 | 0.00 | NaN   |
| 818 | CAMK2G   | 0.02 | 0.00 | 0.00 | 0.21  |
| 819 | CAMLG    | 0.00 | 0.00 | 0.00 | NaN   |
| 820 | CAMP     | 0.00 | 0.00 | 0.05 | -0.01 |
| 821 | CANX     | 0.08 | 0.43 | 0.10 | 0.20  |
| 822 | CAPG     | 0.00 | 0.00 | 0.00 | NaN   |
| 823 | CAPN1    | 0.02 | 0.00 | 0.00 | 0.04  |
| 824 | CAPN2    | 0.02 | 0.00 | 0.05 | 0.08  |
| 825 | CAPN3    | 0.04 | 0.00 | 0.00 | -0.01 |
| 826 | CAPNS1   | 0.02 | 0.00 | 0.05 | 0.18  |
| 829 | CAPZA1   | 0.02 | 0.00 | 0.05 | -0.04 |
| 830 | CAPZA2   | 0.00 | 0.00 | 0.00 | NaN   |
| 831 | CAST     | 0.02 | 0.00 | 0.00 | 0.07  |
| 832 | CAPZB    | 0.00 | 0.00 | 0.00 | NaN   |
| 833 | CARS     | 0.02 | 0.00 | 0.05 | -0.02 |
| 834 | CASP1    | 0.02 | 0.00 | 0.05 | -0.11 |
| 835 | CASP2    | 0.00 | 0.14 | 0.05 | -0.04 |
| 836 | CASP3    | 0.02 | 0.00 | 0.00 | -0.01 |
| 837 | CASP4    | 0.06 | 0.00 | 0.05 | -0.09 |
| 838 | CASP5    | 0.02 | 0.00 | 0.05 | 0.17  |
| 839 | CASP6    | 0.08 | 0.00 | 0.00 | 0.00  |
| 840 | CASP7    | 0.00 | 0.14 | 0.05 | 0.04  |
| 841 | CASP8    | 0.00 | 0.00 | 0.00 | NaN   |
| 842 | CASP9    | 0.02 | 0.00 | 0.00 | 0.03  |
| 843 | CASP10   | 0.00 | 0.00 | 0.05 | 0.43  |
| 844 | CASQ1    | 0.00 | 0.00 | 0.00 | NaN   |
| 845 | CASQ2    | 0.08 | 0.00 | 0.10 | 0.20  |
| 846 | CASR     | 0.00 | 0.00 | 0.10 | -0.01 |
| 847 | CAT      | 0.02 | 0.00 | 0.00 | -0.14 |
| 857 | CAV1     | 0.00 | 0.00 | 0.00 | NaN   |
| 858 | CAV2     | 0.00 | 0.00 | 0.00 | NaN   |
| 859 | CAV3     | 0.00 | 0.00 | 0.10 | 0.08  |
| 860 | RUNX2    | 0.04 | 0.14 | 0.20 | 0.15  |
| 861 | RUNX1    | 0.00 | 0.00 | 0.05 | -0.08 |
| 863 | CBFA2T3  | 0.00 | 0.00 | 0.10 | -0.04 |
| 864 | RUNX3    | 0.02 | 0.00 | 0.05 | 0.03  |
| 865 | CBFB     | 0.02 | 0.00 | 0.00 | -0.04 |
| 866 | SERPINA6 | 0.00 | 0.00 | 0.00 | NaN   |
| 867 | CBL      | 0.00 | 0.00 | 0.05 | -0.06 |
| 868 | CBLB     | 0.02 | 0.14 | 0.05 | 0.32  |
| 869 | CBLN1    | 0.43 | 0.29 | 0.15 | -0.17 |
| 871 | SERPINH1 | 0.00 | 0.00 | 0.00 | NaN   |
| 873 | CBR1     | 0.00 | 0.00 | 0.05 | 0.02  |
| 874 | CBR3     | 0.00 | 0.00 | 0.05 | 0.04  |
| 875 | CBS      | 0.00 | 0.00 | 0.00 | NaN   |
| 881 | CCIN     | 0.02 | 0.00 | 0.00 | -0.02 |

|     |         |      |      |      |       |
|-----|---------|------|------|------|-------|
| 883 | CCBL1   | 0.00 | 0.00 | 0.00 | NaN   |
| 885 | CCK     | 0.00 | 0.00 | 0.05 | -0.04 |
| 886 | CCKAR   | 0.00 | 0.00 | 0.00 | NaN   |
| 887 | CCKBR   | 0.00 | 0.00 | 0.00 | NaN   |
| 890 | CCNA2   | 0.00 | 0.14 | 0.05 | -0.15 |
| 891 | CCNB1   | 0.06 | 0.00 | 0.00 | -0.13 |
| 894 | CCND2   | 0.02 | 0.00 | 0.00 | -0.02 |
| 896 | CCND3   | 0.06 | 0.00 | 0.05 | -0.21 |
| 898 | CCNE1   | 0.04 | 0.00 | 0.10 | 0.41  |
| 899 | CCNF    | 0.02 | 0.00 | 0.00 | 0.09  |
| 900 | CCNG1   | 0.00 | 0.00 | 0.00 | NaN   |
| 901 | CCNG2   | 0.00 | 0.00 | 0.00 | NaN   |
| 902 | CCNH    | 0.00 | 0.00 | 0.00 | NaN   |
| 904 | CCNT1   | 0.04 | 0.00 | 0.05 | -0.06 |
| 905 | CCNT2   | 0.00 | 0.00 | 0.00 | NaN   |
| 908 | CCT6A   | 0.04 | 0.14 | 0.20 | -0.05 |
| 909 | CD1A    | 0.00 | 0.00 | 0.00 | NaN   |
| 910 | CD1B    | 0.00 | 0.00 | 0.00 | NaN   |
| 911 | CD1C    | 0.00 | 0.00 | 0.00 | NaN   |
| 912 | CD1D    | 0.00 | 0.00 | 0.00 | NaN   |
| 913 | CD1E    | 0.00 | 0.00 | 0.00 | NaN   |
| 914 | CD2     | 0.08 | 0.00 | 0.10 | 0.22  |
| 915 | CD3D    | 0.00 | 0.00 | 0.00 | NaN   |
| 916 | CD3E    | 0.00 | 0.00 | 0.00 | NaN   |
| 917 | CD3G    | 0.00 | 0.00 | 0.00 | NaN   |
| 921 | CD5     | 0.00 | 0.00 | 0.05 | -0.08 |
| 922 | CD5L    | 0.04 | 0.14 | 0.05 | -0.10 |
| 923 | CD6     | 0.00 | 0.00 | 0.05 | 0.02  |
| 924 | CD7     | 0.00 | 0.00 | 0.00 | NaN   |
| 925 | CD8A    | 0.04 | 0.00 | 0.05 | -0.05 |
| 928 | CD9     | 0.02 | 0.00 | 0.15 | 0.04  |
| 929 | CD14    | 0.00 | 0.00 | 0.00 | NaN   |
| 930 | CD19    | 0.06 | 0.14 | 0.00 | 0.01  |
| 931 | MS4A2   | 0.00 | 0.00 | 0.00 | NaN   |
| 933 | CD22    | 0.00 | 0.00 | 0.00 | NaN   |
| 940 | CD28    | 0.00 | 0.00 | 0.00 | NaN   |
| 941 | CD80    | 0.00 | 0.00 | 0.00 | NaN   |
| 942 | CD86    | 0.00 | 0.00 | 0.10 | 0.17  |
| 943 | TNFRSF8 | 0.00 | 0.00 | 0.00 | NaN   |
| 944 | TNFSF8  | 0.02 | 0.00 | 0.00 | -0.08 |
| 945 | CD33    | 0.02 | 0.00 | 0.05 | -0.19 |
| 946 | SIGLEC6 | 0.02 | 0.00 | 0.05 | -0.07 |
| 948 | CD36    | 0.00 | 0.00 | 0.00 | NaN   |
| 951 | CD37    | 0.02 | 0.00 | 0.05 | -0.01 |
| 952 | CD38    | 0.00 | 0.00 | 0.00 | NaN   |
| 953 | ENTPD1  | 0.00 | 0.00 | 0.00 | NaN   |
| 955 | ENTPD6  | 0.04 | 0.00 | 0.15 | -0.20 |

|      |        |      |      |      |       |
|------|--------|------|------|------|-------|
| 956  | ENTPD3 | 0.02 | 0.00 | 0.05 | -0.13 |
| 957  | ENTPD5 | 0.02 | 0.00 | 0.05 | 0.01  |
| 960  | CD44   | 0.02 | 0.00 | 0.00 | 0.16  |
| 961  | CD47   | 0.02 | 0.00 | 0.00 | -0.06 |
| 962  | CD48   | 0.00 | 0.00 | 0.00 | NaN   |
| 963  | CD53   | 0.06 | 0.14 | 0.00 | -0.09 |
| 965  | CD58   | 0.08 | 0.00 | 0.10 | -0.05 |
| 966  | CD59   | 0.00 | 0.00 | 0.00 | NaN   |
| 967  | CD63   | 0.02 | 0.00 | 0.05 | -0.04 |
| 968  | CD68   | 0.02 | 0.00 | 0.00 | 0.00  |
| 969  | CD69   | 0.02 | 0.00 | 0.15 | 0.10  |
| 972  | CD74   | 0.00 | 0.00 | 0.00 | NaN   |
| 973  | CD79A  | 0.00 | 0.00 | 0.05 | 0.29  |
| 974  | CD79B  | 0.12 | 0.00 | 0.20 | -0.06 |
| 975  | CD81   | 0.00 | 0.00 | 0.00 | NaN   |
| 976  | CD97   | 0.00 | 0.00 | 0.05 | -0.03 |
| 977  | CD151  | 0.02 | 0.00 | 0.05 | 0.08  |
| 978  | CDA    | 0.02 | 0.00 | 0.05 | 0.24  |
| 983  | CDC2   | 0.00 | 0.00 | 0.05 | 0.24  |
| 987  | LRBA   | 0.02 | 0.14 | 0.10 | -0.15 |
| 988  | CDC5L  | 0.04 | 0.14 | 0.20 | 0.18  |
| 990  | CDC6   | 0.02 | 0.86 | 0.05 | 0.17  |
| 991  | CDC20  | 0.02 | 0.00 | 0.05 | 0.03  |
| 993  | CDC25A | 0.00 | 0.00 | 0.05 | 0.20  |
| 994  | CDC25B | 0.02 | 0.00 | 0.00 | 0.11  |
| 995  | CDC25C | 0.02 | 0.00 | 0.00 | 0.03  |
| 996  | CDC27  | 0.00 | 0.00 | 0.00 | NaN   |
| 997  | CDC34  | 0.06 | 0.00 | 0.15 | 0.16  |
| 998  | CDC42  | 0.00 | 0.00 | 0.05 | 0.08  |
| 999  | CDH1   | 0.00 | 0.00 | 0.05 | 0.20  |
| 1000 | CDH2   | 0.00 | 0.00 | 0.05 | 0.11  |
| 1001 | CDH3   | 0.00 | 0.00 | 0.05 | 0.27  |
| 1002 | CDH4   | 0.12 | 0.00 | 0.00 | 0.00  |
| 1003 | CDH5   | 0.02 | 0.00 | 0.00 | -0.14 |
| 1004 | CDH6   | 0.02 | 0.14 | 0.05 | -0.07 |
| 1005 | CDH7   | 0.02 | 0.00 | 0.00 | -0.03 |
| 1006 | CDH8   | 0.00 | 0.00 | 0.00 | NaN   |
| 1007 | CDH9   | 0.02 | 0.14 | 0.05 | -0.02 |
| 1008 | CDH10  | 0.02 | 0.14 | 0.05 | -0.03 |
| 1009 | CDH11  | 0.00 | 0.14 | 0.05 | 0.06  |
| 1010 | CDH12  | 0.02 | 0.14 | 0.05 | 0.24  |
| 1012 | CDH13  | 0.02 | 0.00 | 0.00 | 0.19  |
| 1013 | CDH15  | 0.00 | 0.00 | 0.10 | -0.06 |
| 1014 | CDH16  | 0.02 | 0.00 | 0.00 | 0.04  |
| 1015 | CDH17  | 0.08 | 0.00 | 0.05 | -0.06 |
| 1016 | CDH18  | 0.02 | 0.14 | 0.05 | -0.03 |
| 1017 | CDK2   | 0.02 | 0.00 | 0.05 | 0.02  |

|      |         |       |      |      |       |
|------|---------|-------|------|------|-------|
| 1018 | CDK3    | 0.02  | 0.14 | 0.05 | 0.07  |
| 1019 | CDK4    | 0.02  | 0.00 | 0.00 | 0.07  |
| 1020 | CDK5    | 0.02  | 0.00 | 0.00 | -0.05 |
| 1021 | CDK6    | 0.00  | 0.00 | 0.00 | NaN   |
| 1022 | CDK7    | 0.06  | 0.00 | 0.00 | -0.14 |
| 1024 | CDK8    | 0.00  | 0.00 | 0.05 | 0.19  |
| 1025 | CDK9    | 0.02  | 0.00 | 0.00 | -0.02 |
| 1026 | CDKN1A  | 0.04  | 0.00 | 0.00 | 0.00  |
| 1027 | CDKN1B  | 0.04  | 0.00 | 0.05 | -0.28 |
| 1028 | CDKN1C  | 0.00  | 0.00 | 0.00 | NaN   |
| 1029 | CDKN2A  | -0.02 | 0.00 | 0.00 | 0.12  |
| 1030 | CDKN2B  | -0.02 | 0.00 | 0.00 | 0.03  |
| 1031 | CDKN2C  | 0.02  | 0.00 | 0.00 | -0.05 |
| 1032 | CDKN2D  | 0.02  | 0.00 | 0.15 | -0.13 |
| 1033 | CDKN3   | 0.00  | 0.00 | 0.05 | -0.12 |
| 1036 | CDO1    | 0.02  | 0.00 | 0.00 | -0.01 |
| 1039 | CDR2    | 0.02  | 0.14 | 0.00 | -0.05 |
| 1040 | CDS1    | 0.00  | 0.00 | 0.05 | -0.10 |
| 1041 | CDSN    | 0.04  | 0.14 | 0.05 | 0.06  |
| 1044 | CDX1    | 0.00  | 0.00 | 0.00 | NaN   |
| 1045 | CDX2    | 0.00  | 0.00 | 0.05 | 0.03  |
| 1047 | CLGN    | 0.00  | 0.00 | 0.05 | -0.11 |
| 1048 | CEACAM5 | 0.00  | 0.00 | 0.05 | -0.09 |
| 1050 | CEBPA   | 0.00  | 0.00 | 0.00 | NaN   |
| 1051 | CEBPB   | 0.06  | 0.00 | 0.05 | 0.36  |
| 1052 | CEBPD   | 0.04  | 0.00 | 0.00 | -0.09 |
| 1053 | CEBPE   | 0.02  | 0.14 | 0.10 | 0.26  |
| 1054 | CEBPG   | 0.00  | 0.00 | 0.00 | NaN   |
| 1056 | CEL     | 0.04  | 0.00 | 0.00 | -0.12 |
| 1058 | CENPA   | 0.00  | 0.00 | 0.00 | NaN   |
| 1060 | CENPC1  | 0.00  | 0.00 | 0.05 | 0.21  |
| 1062 | CENPE   | 0.08  | 0.00 | 0.00 | 0.24  |
| 1063 | CENPF   | 0.00  | 0.00 | 0.05 | 0.19  |
| 1066 | CES1    | 0.02  | 0.00 | 0.00 | 0.13  |
| 1068 | CETN1   | 0.02  | 0.00 | 0.05 | -0.06 |
| 1070 | CETN3   | 0.00  | 0.00 | 0.00 | NaN   |
| 1071 | CETP    | 0.00  | 0.14 | 0.00 | -0.02 |
| 1072 | CFL1    | 0.04  | 0.00 | 0.05 | 0.31  |
| 1075 | CTSC    | 0.00  | 0.00 | 0.00 | NaN   |
| 1080 | CFTR    | 0.00  | 0.00 | 0.15 | -0.09 |
| 1081 | CGA     | 0.00  | 0.00 | 0.05 | -0.03 |
| 1082 | CGB     | 0.06  | 0.00 | 0.05 | 0.29  |
| 1084 | CEACAM3 | 0.00  | 0.00 | 0.05 | 0.63  |
| 1087 | CEACAM7 | 0.00  | 0.00 | 0.05 | 0.59  |
| 1088 | CEACAM8 | 0.00  | 0.00 | 0.00 | NaN   |
| 1089 | CEACAM4 | 0.00  | 0.00 | 0.05 | 0.19  |
| 1101 | CHAD    | 0.10  | 0.00 | 0.10 | 0.00  |

|      |        |      |      |      |       |
|------|--------|------|------|------|-------|
| 1103 | CHAT   | 0.02 | 0.00 | 0.05 | -0.10 |
| 1105 | CHD1   | 0.02 | 0.00 | 0.00 | -0.08 |
| 1106 | CHD2   | 0.02 | 0.00 | 0.10 | -0.05 |
| 1107 | CHD3   | 0.00 | 0.00 | 0.00 | NaN   |
| 1108 | CHD4   | 0.02 | 0.00 | 0.15 | 0.05  |
| 1109 | AKR1C4 | 0.00 | 0.00 | 0.00 | NaN   |
| 1111 | CHEK1  | 0.02 | 0.00 | 0.00 | -0.07 |
| 1113 | CHGA   | 0.02 | 0.00 | 0.00 | 0.01  |
| 1114 | CHGB   | 0.00 | 0.00 | 0.00 | NaN   |
| 1116 | CHI3L1 | 0.00 | 0.00 | 0.00 | NaN   |
| 1117 | CHI3L2 | 0.06 | 0.14 | 0.00 | -0.21 |
| 1118 | CHIT1  | 0.00 | 0.00 | 0.00 | NaN   |
| 1122 | CHML   | 0.02 | 0.00 | 0.10 | 0.09  |
| 1123 | CHN1   | 0.00 | 0.00 | 0.00 | NaN   |
| 1124 | CHN2   | 0.00 | 0.00 | 0.00 | NaN   |
| 1129 | CHRM2  | 0.00 | 0.00 | 0.00 | NaN   |
| 1132 | CHRM4  | 0.00 | 0.00 | 0.05 | 0.02  |
| 1133 | CHRM5  | 0.04 | 0.00 | 0.05 | 0.07  |
| 1134 | CHRNA1 | 0.00 | 0.00 | 0.00 | NaN   |
| 1135 | CHRNA2 | 0.04 | 0.00 | 0.10 | -0.06 |
| 1136 | CHRNA3 | 0.00 | 0.00 | 0.05 | 0.02  |
| 1137 | CHRNA4 | 0.08 | 0.00 | 0.05 | 0.07  |
| 1138 | CHRNA5 | 0.00 | 0.00 | 0.05 | -0.03 |
| 1139 | CHRNA7 | 0.00 | 0.00 | 0.00 | NaN   |
| 1140 | CHRN1  | 0.02 | 0.00 | 0.00 | -0.03 |
| 1141 | CHRN2  | 0.04 | 0.00 | 0.15 | -0.14 |
| 1142 | CHRN3  | 0.04 | 0.14 | 0.05 | 0.14  |
| 1143 | CHRN4  | 0.00 | 0.00 | 0.05 | 0.06  |
| 1144 | CHRN5  | 0.00 | 0.00 | 0.05 | 0.17  |
| 1145 | CHRN6  | 0.04 | 0.00 | 0.10 | 0.18  |
| 1146 | CHRN7  | 0.00 | 0.00 | 0.05 | -0.08 |
| 1147 | CHUK   | 0.00 | 0.00 | 0.05 | -0.16 |
| 1149 | CIDEA  | 0.04 | 0.00 | 0.10 | -0.05 |
| 1152 | CKB    | 0.00 | 0.00 | 0.05 | -0.13 |
| 1153 | CIRBP  | 0.02 | 0.00 | 0.05 | -0.11 |
| 1154 | CISH   | 0.00 | 0.00 | 0.10 | -0.10 |
| 1158 | CKM    | 0.00 | 0.00 | 0.00 | NaN   |
| 1160 | CKMT2  | 0.00 | 0.00 | 0.00 | NaN   |
| 1164 | CKS2   | 0.00 | 0.00 | 0.00 | NaN   |
| 1173 | AP2M1  | 0.00 | 0.00 | 0.00 | NaN   |
| 1174 | AP1S1  | 0.00 | 0.14 | 0.00 | 0.22  |
| 1175 | AP2S1  | 0.00 | 0.00 | 0.05 | 0.16  |
| 1176 | AP3S1  | 0.02 | 0.00 | 0.00 | 0.02  |
| 1178 | CLC    | 0.06 | 0.00 | 0.05 | 0.03  |
| 1179 | CLCA1  | 0.04 | 0.00 | 0.05 | 0.03  |
| 1180 | CLCN1  | 0.00 | 0.14 | 0.05 | -0.05 |
| 1181 | CLCN2  | 0.02 | 0.14 | 0.00 | -0.07 |



|      |        |      |      |      |       |
|------|--------|------|------|------|-------|
| 1182 | CLCN3  | 0.02 | 0.00 | 0.00 | 0.29  |
| 1185 | CLCN6  | 0.02 | 0.00 | 0.00 | 0.03  |
| 1186 | CLCN7  | 0.18 | 0.00 | 0.10 | -0.08 |
| 1187 | CLCNKA | 0.02 | 0.00 | 0.00 | -0.06 |
| 1188 | CLCNKB | 0.02 | 0.00 | 0.00 | -0.02 |
| 1191 | CLU    | 0.04 | 0.00 | 0.10 | -0.12 |
| 1192 | CLIC1  | 0.02 | 0.00 | 0.05 | 0.15  |
| 1196 | CLK2   | 0.04 | 0.00 | 0.15 | 0.11  |
| 1198 | CLK3   | 0.00 | 0.00 | 0.00 | NaN   |
| 1201 | CLN3   | 0.06 | 0.14 | 0.00 | 0.23  |
| 1203 | CLN5   | 0.02 | 0.00 | 0.00 | -0.06 |
| 1207 | CLNS1A | 0.06 | 0.00 | 0.05 | 0.22  |
| 1208 | CLPS   | 0.04 | 0.00 | 0.00 | -0.05 |
| 1209 | CLPTM1 | 0.00 | 0.00 | 0.00 | NaN   |
| 1211 | CLTA   | 0.02 | 0.00 | 0.00 | -0.19 |
| 1212 | CLTB   | 0.00 | 0.00 | 0.00 | NaN   |
| 1213 | CLTC   | 0.06 | 0.00 | 0.05 | 0.49  |
| 1215 | CMA1   | 0.02 | 0.00 | 0.05 | -0.08 |
| 1230 | CCR1   | 0.02 | 0.14 | 0.15 | -0.11 |
| 1231 | CCR2   | 0.02 | 0.14 | 0.15 | -0.04 |
| 1232 | CCR3   | 0.02 | 0.14 | 0.15 | -0.16 |
| 1233 | CCR4   | 0.06 | 0.00 | 0.05 | 0.02  |
| 1235 | CCR6   | 0.02 | 0.00 | 0.05 | -0.02 |
| 1236 | CCR7   | 0.02 | 0.86 | 0.05 | -0.02 |
| 1237 | CCR8   | 0.02 | 0.00 | 0.05 | 0.02  |
| 1238 | CCBP2  | 0.00 | 0.00 | 0.05 | 0.16  |
| 1240 | CMKLR1 | 0.02 | 0.00 | 0.00 | -0.03 |
| 1241 | LTB4R  | 0.02 | 0.14 | 0.10 | -0.06 |
| 1244 | ABCC2  | 0.00 | 0.00 | 0.00 | NaN   |
| 1258 | CNGB1  | 0.02 | 0.00 | 0.00 | 0.07  |
| 1259 | CNGA1  | 0.00 | 0.29 | 0.10 | 0.29  |
| 1261 | CNGA3  | 0.02 | 0.00 | 0.10 | -0.11 |
| 1264 | CNN1   | 0.02 | 0.00 | 0.00 | -0.08 |
| 1265 | CNN2   | 0.02 | 0.00 | 0.05 | -0.26 |
| 1266 | CNN3   | 0.00 | 0.00 | 0.00 | NaN   |
| 1267 | CNP    | 0.02 | 0.86 | 0.05 | 0.35  |
| 1268 | CNR1   | 0.00 | 0.00 | 0.05 | 0.07  |
| 1269 | CNR2   | 0.02 | 0.00 | 0.05 | -0.05 |
| 1270 | CNTF   | 0.02 | 0.00 | 0.00 | 0.37  |
| 1271 | CNTFR  | 0.00 | 0.00 | 0.00 | NaN   |
| 1272 | CNTN1  | 0.00 | 0.00 | 0.35 | -0.03 |
| 1277 | COL1A1 | 0.06 | 0.00 | 0.00 | 0.07  |
| 1280 | COL2A1 | 0.04 | 0.00 | 0.05 | 0.03  |
| 1281 | COL3A1 | 0.00 | 0.00 | 0.05 | 0.09  |
| 1282 | COL4A1 | 0.00 | 0.00 | 0.05 | 0.14  |
| 1284 | COL4A2 | 0.00 | 0.00 | 0.05 | 0.10  |
| 1285 | COL4A3 | 0.02 | 0.00 | 0.15 | 0.05  |

|      |         |      |      |      |       |
|------|---------|------|------|------|-------|
| 1286 | COL4A4  | 0.02 | 0.00 | 0.15 | 0.03  |
| 1290 | COL5A2  | 0.00 | 0.00 | 0.05 | 0.07  |
| 1291 | COL6A1  | 0.00 | 0.00 | 0.05 | 0.03  |
| 1292 | COL6A2  | 0.00 | 0.00 | 0.05 | -0.04 |
| 1293 | COL6A3  | 0.00 | 0.00 | 0.00 | NaN   |
| 1294 | COL7A1  | 0.00 | 0.00 | 0.05 | 0.08  |
| 1295 | COL8A1  | 0.00 | 0.00 | 0.15 | -0.09 |
| 1297 | COL9A1  | 0.12 | 0.00 | 0.05 | 0.22  |
| 1298 | COL9A2  | 0.02 | 0.00 | 0.05 | -0.11 |
| 1299 | COL9A3  | 0.08 | 0.00 | 0.05 | -0.06 |
| 1300 | COL10A1 | 0.06 | 0.00 | 0.05 | -0.09 |
| 1301 | COL11A1 | 0.00 | 0.14 | 0.00 | 0.10  |
| 1305 | COL13A1 | 0.00 | 0.00 | 0.00 | NaN   |
| 1306 | COL15A1 | 0.04 | 0.00 | 0.00 | 0.05  |
| 1307 | COL16A1 | 0.00 | 0.14 | 0.00 | -0.12 |
| 1308 | COL17A1 | 0.02 | 0.00 | 0.00 | 0.20  |
| 1310 | COL19A1 | 0.12 | 0.00 | 0.05 | 0.12  |
| 1311 | COMP    | 0.02 | 0.00 | 0.00 | 0.10  |
| 1312 | COMT    | 0.06 | 0.14 | 0.15 | 0.17  |
| 1314 | COPA    | 0.00 | 0.00 | 0.00 | NaN   |
| 1317 | SLC31A1 | 0.00 | 0.00 | 0.00 | NaN   |
| 1318 | SLC31A2 | 0.02 | 0.00 | 0.00 | 0.11  |
| 1325 | CORT    | 0.02 | 0.00 | 0.00 | 0.20  |
| 1326 | MAP3K8  | 0.02 | 0.14 | 0.00 | 0.25  |
| 1327 | COX4I1  | 0.02 | 0.00 | 0.05 | 0.05  |
| 1329 | COX5B   | 0.00 | 0.00 | 0.10 | -0.03 |
| 1337 | COX6A1  | 0.02 | 0.00 | 0.10 | 0.02  |
| 1339 | COX6A2  | 0.02 | 0.00 | 0.00 | -0.09 |
| 1345 | COX6C   | 0.08 | 0.00 | 0.05 | 0.25  |
| 1346 | COX7A1  | 0.02 | 0.00 | 0.05 | 0.03  |
| 1347 | COX7A2  | 0.10 | 0.00 | 0.20 | 0.20  |
| 1350 | COX7C   | 0.00 | 0.00 | 0.00 | NaN   |
| 1352 | COX10   | 0.04 | 0.00 | 0.00 | 0.18  |
| 1353 | COX11   | 0.02 | 0.00 | 0.10 | 0.22  |
| 1355 | COX15   | 0.00 | 0.00 | 0.00 | NaN   |
| 1356 | CP      | 0.00 | 0.00 | 0.00 | NaN   |
| 1357 | CPA1    | 0.00 | 0.00 | 0.00 | NaN   |
| 1358 | CPA2    | 0.00 | 0.00 | 0.00 | NaN   |
| 1359 | CPA3    | 0.00 | 0.00 | 0.00 | NaN   |
| 1360 | CPB1    | 0.00 | 0.00 | 0.00 | NaN   |
| 1361 | CPB2    | 0.00 | 0.00 | 0.00 | NaN   |
| 1362 | CPD     | 0.10 | 0.00 | 0.05 | 0.18  |
| 1363 | CPE     | 0.02 | 0.00 | 0.00 | 0.05  |
| 1364 | CLDN4   | 0.00 | 0.00 | 0.00 | NaN   |
| 1365 | CLDN3   | 0.00 | 0.00 | 0.00 | NaN   |
| 1366 | CLDN7   | 0.00 | 0.00 | 0.00 | NaN   |
| 1368 | CPM     | 0.08 | 0.00 | 0.00 | 0.12  |

|      |        |      |      |      |       |
|------|--------|------|------|------|-------|
| 1369 | CPN1   | 0.00 | 0.00 | 0.05 | -0.04 |
| 1370 | CPN2   | 0.02 | 0.00 | 0.00 | -0.02 |
| 1371 | CPO    | 0.00 | 0.00 | 0.00 | NaN   |
| 1373 | CPS1   | 0.02 | 0.00 | 0.05 | -0.04 |
| 1374 | CPT1A  | 0.02 | 0.00 | 0.05 | 0.58  |
| 1376 | CPT2   | 0.02 | 0.00 | 0.00 | 0.15  |
| 1378 | CR1    | 0.00 | 0.00 | 0.05 | 0.12  |
| 1380 | CR2    | 0.00 | 0.00 | 0.05 | -0.04 |
| 1381 | CRABP1 | 0.00 | 0.00 | 0.05 | 0.00  |
| 1382 | CRABP2 | 0.04 | 0.14 | 0.05 | 0.03  |
| 1384 | CRAT   | 0.00 | 0.00 | 0.00 | NaN   |
| 1385 | CREB1  | 0.02 | 0.00 | 0.05 | 0.04  |
| 1386 | ATF2   | 0.00 | 0.00 | 0.00 | NaN   |
| 1387 | CREBBP | 0.02 | 0.00 | 0.00 | 0.07  |
| 1389 | CREBL2 | 0.04 | 0.00 | 0.05 | -0.13 |
| 1390 | CREM   | 0.04 | 0.29 | 0.25 | 0.26  |
| 1392 | CRH    | 0.00 | 0.00 | 0.00 | NaN   |
| 1393 | CRHBP  | 0.04 | 0.00 | 0.05 | -0.07 |
| 1394 | CRHR1  | 0.00 | 0.00 | 0.05 | 0.02  |
| 1395 | CRHR2  | 0.00 | 0.00 | 0.00 | NaN   |
| 1396 | CRIP1  | 0.02 | 0.00 | 0.10 | -0.11 |
| 1397 | CRIP2  | 0.02 | 0.00 | 0.10 | -0.05 |
| 1398 | CRK    | 0.04 | 0.00 | 0.05 | 0.01  |
| 1399 | CRKL   | 0.06 | 0.14 | 0.15 | 0.12  |
| 1400 | CRMP1  | 0.00 | 0.00 | 0.00 | NaN   |
| 1401 | CRP    | 0.00 | 0.00 | 0.00 | NaN   |
| 1406 | CRX    | 0.00 | 0.00 | 0.00 | NaN   |
| 1407 | CRY1   | 0.02 | 0.00 | 0.00 | 0.00  |
| 1408 | CRY2   | 0.04 | 0.00 | 0.05 | -0.22 |
| 1409 | CRYAA  | 0.00 | 0.00 | 0.00 | NaN   |
| 1410 | CRYAB  | 0.02 | 0.00 | 0.00 | -0.11 |
| 1411 | CRYBA1 | 0.10 | 0.00 | 0.05 | 0.17  |
| 1412 | CRYBA2 | 0.04 | 0.00 | 0.00 | -0.07 |
| 1413 | CRYBA4 | 0.00 | 0.14 | 0.05 | 0.19  |
| 1414 | CRYBB1 | 0.00 | 0.14 | 0.05 | -0.12 |
| 1415 | CRYBB2 | 0.00 | 0.14 | 0.05 | 0.17  |
| 1417 | CRYBB3 | 0.00 | 0.14 | 0.05 | 0.18  |
| 1418 | CRYGA  | 0.02 | 0.00 | 0.05 | -0.10 |
| 1419 | CRYGB  | 0.02 | 0.00 | 0.05 | -0.13 |
| 1420 | CRYGC  | 0.02 | 0.00 | 0.05 | 0.04  |
| 1421 | CRYGD  | 0.02 | 0.00 | 0.05 | -0.01 |
| 1428 | CRYM   | 0.02 | 0.14 | 0.00 | -0.12 |
| 1429 | CRYZ   | 0.04 | 0.14 | 0.00 | -0.08 |
| 1431 | CS     | 0.00 | 0.00 | 0.00 | NaN   |
| 1432 | MAPK14 | 0.04 | 0.00 | 0.00 | 0.18  |
| 1434 | CSE1L  | 0.04 | 0.00 | 0.00 | 0.78  |
| 1435 | CSF1   | 0.02 | 0.00 | 0.05 | 0.08  |

|      |          |      |      |      |       |
|------|----------|------|------|------|-------|
| 1436 | CSF1R    | 0.00 | 0.14 | 0.05 | -0.09 |
| 1437 | CSF2     | 0.02 | 0.00 | 0.00 | 0.06  |
| 1439 | CSF2RB   | 0.00 | 0.14 | 0.00 | 0.12  |
| 1440 | CSF3     | 0.02 | 0.86 | 0.05 | 0.00  |
| 1441 | CSF3R    | 0.04 | 0.00 | 0.05 | 0.04  |
| 1442 | CSH1     | 0.12 | 0.00 | 0.20 | 0.08  |
| 1443 | CSH2     | 0.12 | 0.00 | 0.20 | 0.07  |
| 1444 | CSHL1    | 0.12 | 0.00 | 0.20 | 0.05  |
| 1445 | CSK      | 0.00 | 0.00 | 0.05 | -0.01 |
| 1447 | CSN2     | 0.00 | 0.14 | 0.00 | -0.01 |
| 1452 | CSNK1A1  | 0.00 | 0.14 | 0.05 | -0.13 |
| 1453 | CSNK1D   | 0.00 | 0.00 | 0.00 | NaN   |
| 1454 | CSNK1E   | 0.00 | 0.14 | 0.00 | 0.11  |
| 1455 | CSNK1G2  | 0.02 | 0.00 | 0.05 | 0.12  |
| 1456 | CSNK1G3  | 0.00 | 0.00 | 0.00 | NaN   |
| 1457 | CSNK2A1  | 0.00 | 0.00 | 0.00 | NaN   |
| 1459 | CSNK2A2  | 0.04 | 0.00 | 0.05 | -0.03 |
| 1460 | CSNK2B   | 0.02 | 0.00 | 0.05 | 0.10  |
| 1464 | CSPG4    | 0.00 | 0.00 | 0.05 | 0.07  |
| 1465 | CSRP1    | 0.00 | 0.00 | 0.05 | -0.07 |
| 1466 | CSRP2    | 0.00 | 0.00 | 0.00 | NaN   |
| 1468 | SLC25A10 | 0.00 | 0.00 | 0.00 | NaN   |
| 1469 | CST1     | 0.02 | 0.00 | 0.05 | -0.10 |
| 1470 | CST2     | 0.02 | 0.00 | 0.05 | -0.08 |
| 1471 | CST3     | 0.00 | 0.00 | 0.00 | NaN   |
| 1472 | CST4     | 0.02 | 0.00 | 0.05 | -0.08 |
| 1473 | CST5     | 0.02 | 0.00 | 0.05 | -0.06 |
| 1474 | CST6     | 0.04 | 0.00 | 0.05 | 0.14  |
| 1475 | CSTA     | 0.00 | 0.00 | 0.10 | 0.30  |
| 1476 | CSTB     | 0.02 | 0.00 | 0.00 | -0.03 |
| 1477 | CSTF1    | 0.12 | 0.00 | 0.10 | -0.11 |
| 1479 | CSTF3    | 0.02 | 0.00 | 0.00 | -0.07 |
| 1486 | CTBS     | 0.04 | 0.00 | 0.05 | 0.08  |
| 1487 | CTBP1    | 0.02 | 0.00 | 0.00 | 0.09  |
| 1488 | CTBP2    | 0.04 | 0.00 | 0.05 | 0.04  |
| 1489 | CTF1     | 0.02 | 0.00 | 0.00 | -0.01 |
| 1490 | CTGF     | 0.02 | 0.00 | 0.00 | -0.09 |
| 1491 | CTH      | 0.04 | 0.14 | 0.00 | 0.03  |
| 1493 | CTLA4    | 0.00 | 0.00 | 0.00 | NaN   |
| 1495 | CTNNA1   | 0.00 | 0.00 | 0.00 | NaN   |
| 1496 | CTNNA2   | 0.00 | 0.00 | 0.00 | NaN   |
| 1497 | CTNS     | 0.04 | 0.00 | 0.10 | 0.06  |
| 1499 | CTNNB1   | 0.00 | 0.00 | 0.10 | -0.01 |
| 1500 | CTNND1   | 0.02 | 0.00 | 0.00 | 0.16  |
| 1501 | CTNND2   | 0.02 | 0.00 | 0.00 | 0.25  |
| 1503 | CTPS     | 0.02 | 0.00 | 0.05 | 0.08  |
| 1504 | CTRB1    | 0.00 | 0.00 | 0.00 | NaN   |

|      |         |      |      |      |       |
|------|---------|------|------|------|-------|
| 1506 | CTRL    | 0.02 | 0.00 | 0.00 | 0.00  |
| 1508 | CTSB    | 0.02 | 0.00 | 0.05 | 0.24  |
| 1509 | CTSD    | 0.02 | 0.00 | 0.05 | 0.10  |
| 1510 | CTSE    | 0.02 | 0.00 | 0.05 | -0.02 |
| 1511 | CTSG    | 0.02 | 0.00 | 0.05 | -0.18 |
| 1512 | CTSH    | 0.02 | 0.00 | 0.00 | 0.10  |
| 1513 | CTSK    | 0.02 | 0.00 | 0.10 | -0.31 |
| 1515 | CTSL2   | 0.04 | 0.00 | 0.00 | 0.02  |
| 1519 | CTSO    | 0.00 | 0.14 | 0.00 | -0.16 |
| 1520 | CTSS    | 0.02 | 0.00 | 0.10 | 0.14  |
| 1521 | CTSW    | 0.04 | 0.00 | 0.05 | 0.06  |
| 1522 | CTSZ    | 0.12 | 0.00 | 0.00 | 0.09  |
| 1524 | CX3CR1  | 0.02 | 0.00 | 0.05 | -0.16 |
| 1525 | CXADR   | 0.00 | 0.00 | 0.00 | NaN   |
| 1534 | CYB561  | 0.12 | 0.00 | 0.20 | 0.39  |
| 1535 | CYBA    | 0.00 | 0.00 | 0.10 | 0.18  |
| 1537 | CYC1    | 0.10 | 0.00 | 0.15 | 0.55  |
| 1539 | CYLC2   | 0.04 | 0.00 | 0.00 | -0.08 |
| 1540 | CYLD    | 0.08 | 0.00 | 0.05 | 0.04  |
| 1543 | CYP1A1  | 0.00 | 0.00 | 0.05 | -0.10 |
| 1544 | CYP1A2  | 0.00 | 0.00 | 0.05 | 0.00  |
| 1545 | CYP1B1  | 0.02 | 0.00 | 0.05 | 0.08  |
| 1548 | CYP2A6  | 0.00 | 0.00 | 0.05 | 0.11  |
| 1549 | CYP2A7  | 0.00 | 0.00 | 0.05 | 0.09  |
| 1551 | CYP3A7  | 0.02 | 0.00 | 0.00 | -0.01 |
| 1553 | CYP2A13 | 0.00 | 0.00 | 0.05 | 0.48  |
| 1555 | CYP2B6  | 0.00 | 0.00 | 0.05 | 0.09  |
| 1558 | CYP2C8  | 0.00 | 0.00 | 0.00 | NaN   |
| 1559 | CYP2C9  | 0.00 | 0.00 | 0.00 | NaN   |
| 1562 | CYP2C18 | 0.02 | 0.00 | 0.05 | -0.01 |
| 1565 | CYP2D6  | 0.00 | 0.14 | 0.05 | 0.07  |
| 1572 | CYP2F1  | 0.00 | 0.00 | 0.05 | 0.06  |
| 1573 | CYP2J2  | 0.06 | 0.00 | 0.00 | 0.26  |
| 1576 | CYP3A4  | 0.02 | 0.00 | 0.00 | 0.11  |
| 1577 | CYP3A5  | 0.02 | 0.00 | 0.00 | -0.13 |
| 1579 | CYP4A11 | 0.02 | 0.00 | 0.05 | -0.09 |
| 1580 | CYP4B1  | 0.02 | 0.00 | 0.05 | -0.09 |
| 1581 | CYP7A1  | 0.04 | 0.00 | 0.00 | -0.05 |
| 1584 | CYP11B1 | 0.10 | 0.00 | 0.15 | -0.01 |
| 1585 | CYP11B2 | 0.10 | 0.00 | 0.15 | -0.03 |
| 1589 | CYP21A2 | 0.02 | 0.00 | 0.05 | 0.26  |
| 1592 | CYP26A1 | 0.00 | 0.00 | 0.15 | -0.11 |
| 1593 | CYP27A1 | 0.04 | 0.00 | 0.00 | -0.05 |
| 1594 | CYP27B1 | 0.02 | 0.00 | 0.00 | -0.08 |
| 1600 | DAB1    | 0.02 | 0.00 | 0.00 | -0.02 |
| 1601 | DAB2    | 0.04 | 0.00 | 0.00 | 0.18  |
| 1603 | DAD1    | 0.02 | 0.00 | 0.00 | -0.03 |

|      |         |      |      |      |       |
|------|---------|------|------|------|-------|
| 1605 | DAG1    | 0.06 | 0.00 | 0.05 | -0.07 |
| 1606 | DGKA    | 0.02 | 0.00 | 0.05 | 0.02  |
| 1607 | DGKB    | 0.00 | 0.00 | 0.00 | NaN   |
| 1608 | DGKG    | 0.02 | 0.14 | 0.00 | 0.01  |
| 1609 | DGKQ    | 0.06 | 0.00 | 0.05 | -0.01 |
| 1610 | DAO     | 0.02 | 0.00 | 0.00 | -0.03 |
| 1611 | DAP     | 0.00 | 0.00 | 0.00 | NaN   |
| 1612 | DAPK1   | 0.04 | 0.00 | 0.00 | 0.07  |
| 1613 | DAPK3   | 0.02 | 0.00 | 0.15 | 0.01  |
| 1615 | DARS    | 0.00 | 0.00 | 0.00 | NaN   |
| 1616 | DAXX    | 0.02 | 0.00 | 0.05 | 0.27  |
| 1618 | DAZL    | 0.06 | 0.00 | 0.05 | -0.09 |
| 1621 | DBH     | 0.04 | 0.00 | 0.00 | -0.03 |
| 1622 | DBI     | 0.00 | 0.00 | 0.10 | 0.07  |
| 1627 | DBN1    | 0.00 | 0.29 | 0.00 | 0.09  |
| 1628 | DBP     | 0.06 | 0.00 | 0.05 | 0.23  |
| 1629 | DBT     | 0.02 | 0.00 | 0.00 | 0.04  |
| 1630 | DCC     | 0.00 | 0.00 | 0.15 | 0.00  |
| 1633 | DCK     | 0.02 | 0.00 | 0.05 | 0.12  |
| 1634 | DCN     | 0.00 | 0.00 | 0.00 | NaN   |
| 1635 | DCTD    | 0.00 | 0.14 | 0.05 | -0.05 |
| 1636 | ACE     | 0.12 | 0.00 | 0.20 | 0.01  |
| 1638 | DCT     | 0.04 | 0.00 | 0.00 | -0.01 |
| 1639 | DCTN1   | 0.00 | 0.00 | 0.05 | -0.02 |
| 1642 | DDB1    | 0.00 | 0.00 | 0.05 | 0.01  |
| 1643 | DDB2    | 0.02 | 0.00 | 0.00 | 0.04  |
| 1644 | DDC     | 0.00 | 0.00 | 0.00 | NaN   |
| 1645 | AKR1C1  | 0.00 | 0.00 | 0.00 | NaN   |
| 1646 | AKR1C2  | 0.00 | 0.00 | 0.00 | NaN   |
| 1647 | GADD45A | 0.02 | 0.00 | 0.00 | 0.07  |
| 1649 | DDIT3   | 0.02 | 0.14 | 0.00 | -0.01 |
| 1650 | DDOST   | 0.02 | 0.00 | 0.05 | -0.03 |
| 1652 | DDT     | 0.00 | 0.14 | 0.05 | -0.02 |
| 1653 | DDX1    | 0.00 | 0.00 | 0.00 | NaN   |
| 1655 | DDX5    | 0.12 | 0.00 | 0.20 | 0.19  |
| 1656 | DDX6    | 0.00 | 0.00 | 0.05 | 0.18  |
| 1657 | DMXL1   | 0.00 | 0.00 | 0.00 | NaN   |
| 1662 | DDX10   | 0.02 | 0.00 | 0.00 | -0.06 |
| 1663 | DDX11   | 0.02 | 0.00 | 0.00 | 0.01  |
| 1666 | DECR1   | 0.06 | 0.00 | 0.15 | 0.21  |
| 1667 | DEFA1   | 0.02 | 0.14 | 0.10 | -0.07 |
| 1669 | DEFA4   | 0.02 | 0.14 | 0.10 | -0.15 |
| 1670 | DEFA5   | 0.02 | 0.14 | 0.10 | -0.05 |
| 1671 | DEFA6   | 0.02 | 0.14 | 0.10 | 0.11  |
| 1672 | DEFB1   | 0.02 | 0.14 | 0.10 | 0.09  |
| 1673 | DEFB4   | 0.02 | 0.14 | 0.10 | -0.10 |
| 1674 | DES     | 0.04 | 0.00 | 0.00 | 0.21  |

|      |          |      |      |      |       |
|------|----------|------|------|------|-------|
| 1676 | DFFA     | 0.02 | 0.00 | 0.00 | 0.07  |
| 1687 | DFNA5    | 0.00 | 0.00 | 0.05 | 0.08  |
| 1690 | COCH     | 0.02 | 0.00 | 0.00 | 0.06  |
| 1716 | DGUOK    | 0.00 | 0.00 | 0.05 | -0.05 |
| 1717 | DHCR7    | 0.06 | 0.00 | 0.15 | 0.60  |
| 1718 | DHCR24   | 0.02 | 0.00 | 0.00 | -0.02 |
| 1719 | DHFR     | 0.00 | 0.00 | 0.00 | NaN   |
| 1723 | DHODH    | 0.00 | 0.00 | 0.05 | -0.07 |
| 1725 | DHPS     | 0.06 | 0.14 | 0.00 | 0.10  |
| 1728 | NQO1     | 0.00 | 0.00 | 0.00 | NaN   |
| 1729 | DIAPH1   | 0.00 | 0.00 | 0.00 | NaN   |
| 1733 | DIO1     | 0.04 | 0.00 | 0.00 | -0.12 |
| 1734 | DIO2     | 0.02 | 0.00 | 0.00 | 0.13  |
| 1735 | DIO3     | 0.02 | 0.00 | 0.00 | -0.09 |
| 1737 | DLAT     | 0.02 | 0.00 | 0.00 | -0.04 |
| 1738 | DLD      | 0.00 | 0.00 | 0.00 | NaN   |
| 1739 | DLG1     | 0.02 | 0.00 | 0.00 | 0.24  |
| 1740 | DLG2     | 0.00 | 0.00 | 0.00 | NaN   |
| 1742 | DLG4     | 0.00 | 0.00 | 0.00 | NaN   |
| 1743 | DLST     | 0.02 | 0.00 | 0.05 | -0.07 |
| 1746 | DLX2     | 0.00 | 0.00 | 0.00 | NaN   |
| 1748 | DLX4     | 0.06 | 0.00 | 0.00 | -0.05 |
| 1749 | DLX5     | 0.04 | 0.14 | 0.05 | 0.08  |
| 1750 | DLX6     | 0.04 | 0.14 | 0.05 | 0.03  |
| 1755 | DMBT1    | 0.04 | 0.00 | 0.00 | 0.02  |
| 1757 | SARDH    | 0.04 | 0.00 | 0.00 | 0.08  |
| 1758 | DMP1     | 0.02 | 0.00 | 0.00 | 0.05  |
| 1759 | DNM1     | 0.00 | 0.00 | 0.00 | NaN   |
| 1760 | DMPK     | 0.00 | 0.00 | 0.05 | -0.12 |
| 1761 | DMRT1    | 0.04 | 0.00 | 0.10 | -0.04 |
| 1762 | DMWD     | 0.00 | 0.00 | 0.05 | 0.15  |
| 1770 | DNAH9    | 0.04 | 0.00 | 0.00 | 0.18  |
| 1773 | DNASE1   | 0.02 | 0.00 | 0.00 | 0.07  |
| 1775 | DNASE1L2 | 0.18 | 0.00 | 0.10 | 0.06  |
| 1776 | DNASE1L3 | 0.02 | 0.00 | 0.00 | 0.36  |
| 1777 | DNASE2   | 0.00 | 0.14 | 0.05 | -0.14 |
| 1785 | DNM2     | 0.02 | 0.00 | 0.15 | 0.23  |
| 1786 | DNMT1    | 0.02 | 0.00 | 0.15 | -0.04 |
| 1788 | DNMT3A   | 0.00 | 0.00 | 0.00 | NaN   |
| 1789 | DNMT3B   | 0.04 | 0.00 | 0.15 | 0.00  |
| 1791 | DNTT     | 0.00 | 0.00 | 0.00 | NaN   |
| 1793 | DOCK1    | 0.02 | 0.00 | 0.00 | -0.04 |
| 1794 | DOCK2    | 0.00 | 0.00 | 0.00 | NaN   |
| 1795 | DOCK3    | 0.00 | 0.00 | 0.10 | 0.01  |
| 1796 | DOK1     | 0.00 | 0.00 | 0.05 | 0.00  |
| 1797 | DOM3Z    | 0.02 | 0.00 | 0.05 | 0.27  |
| 1798 | DPAGT1   | 0.00 | 0.00 | 0.05 | 0.00  |

|      |         |      |      |      |       |
|------|---------|------|------|------|-------|
| 1800 | DPEP1   | 0.00 | 0.00 | 0.10 | -0.12 |
| 1803 | DPP4    | 0.02 | 0.00 | 0.00 | 0.02  |
| 1804 | DPP6    | 0.00 | 0.00 | 0.00 | NaN   |
| 1805 | DPT     | 0.00 | 0.00 | 0.10 | -0.01 |
| 1806 | DPYD    | 0.02 | 0.00 | 0.00 | -0.13 |
| 1807 | DPYS    | 0.12 | 0.00 | 0.25 | 0.06  |
| 1808 | DPYSL2  | 0.00 | 0.00 | 0.05 | 0.17  |
| 1809 | DPYSL3  | 0.00 | 0.00 | 0.00 | NaN   |
| 1810 | DR1     | 0.00 | 0.00 | 0.00 | NaN   |
| 1811 | SLC26A3 | 0.00 | 0.00 | 0.00 | NaN   |
| 1812 | DRD1    | 0.00 | 0.00 | 0.00 | NaN   |
| 1813 | DRD2    | 0.00 | 0.00 | 0.00 | NaN   |
| 1814 | DRD3    | 0.02 | 0.00 | 0.00 | 0.14  |
| 1815 | DRD4    | 0.02 | 0.00 | 0.05 | 0.09  |
| 1819 | DRG2    | 0.02 | 0.00 | 0.00 | -0.02 |
| 1823 | DSC1    | 0.02 | 0.00 | 0.10 | -0.14 |
| 1824 | DSC2    | 0.02 | 0.00 | 0.10 | 0.13  |
| 1825 | DSC3    | 0.02 | 0.00 | 0.10 | -0.04 |
| 1826 | DSCAM   | 0.00 | 0.00 | 0.05 | 0.10  |
| 1828 | DSG1    | 0.02 | 0.00 | 0.10 | -0.04 |
| 1830 | DSG3    | 0.02 | 0.00 | 0.10 | 0.01  |
| 1832 | DSP     | 0.00 | 0.00 | 0.05 | 0.06  |
| 1836 | SLC26A2 | 0.00 | 0.14 | 0.05 | -0.01 |
| 1837 | DTNA    | 0.04 | 0.00 | 0.10 | -0.03 |
| 1838 | DTNB    | 0.00 | 0.00 | 0.00 | NaN   |
| 1841 | DTYMK   | 0.08 | 0.43 | 0.10 | -0.11 |
| 1842 | ECM2    | 0.04 | 0.00 | 0.05 | -0.19 |
| 1843 | DUSP1   | 0.00 | 0.00 | 0.10 | -0.04 |
| 1844 | DUSP2   | 0.04 | 0.00 | 0.05 | 0.03  |
| 1845 | DUSP3   | 0.00 | 0.14 | 0.05 | 0.09  |
| 1846 | DUSP4   | 0.04 | 0.00 | 0.00 | 0.08  |
| 1847 | DUSP5   | 0.00 | 0.14 | 0.00 | -0.16 |
| 1848 | DUSP6   | 0.00 | 0.00 | 0.00 | NaN   |
| 1849 | DUSP7   | 0.00 | 0.00 | 0.10 | -0.10 |
| 1850 | DUSP8   | 0.02 | 0.00 | 0.05 | 0.08  |
| 1854 | DUT     | 0.02 | 0.00 | 0.05 | -0.28 |
| 1856 | DVL2    | 0.00 | 0.00 | 0.00 | NaN   |
| 1857 | DVL3    | 0.00 | 0.00 | 0.00 | NaN   |
| 1859 | DYRK1A  | 0.00 | 0.00 | 0.00 | NaN   |
| 1869 | E2F1    | 0.02 | 0.00 | 0.05 | -0.06 |
| 1870 | E2F2    | 0.02 | 0.00 | 0.05 | 0.19  |
| 1871 | E2F3    | 0.00 | 0.00 | 0.00 | NaN   |
| 1874 | E2F4    | 0.02 | 0.00 | 0.00 | -0.02 |
| 1875 | E2F5    | 0.06 | 0.00 | 0.15 | 0.29  |
| 1876 | E2F6    | 0.00 | 0.00 | 0.00 | NaN   |
| 1877 | E4F1    | 0.18 | 0.00 | 0.10 | -0.07 |
| 1889 | ECE1    | 0.02 | 0.00 | 0.00 | 0.04  |



|      |          |      |      |      |       |
|------|----------|------|------|------|-------|
| 1891 | ECH1     | 0.06 | 0.00 | 0.05 | 0.16  |
| 1892 | ECHS1    | 0.00 | 0.00 | 0.00 | NaN   |
| 1893 | ECM1     | 0.02 | 0.00 | 0.10 | -0.17 |
| 1906 | EDN1     | 0.04 | 0.00 | 0.00 | -0.04 |
| 1907 | EDN2     | 0.02 | 0.00 | 0.05 | -0.05 |
| 1908 | EDN3     | 0.12 | 0.00 | 0.00 | 0.04  |
| 1909 | EDNRA    | 0.02 | 0.14 | 0.10 | -0.03 |
| 1910 | EDNRB    | 0.02 | 0.00 | 0.00 | 0.05  |
| 1915 | EEF1A1   | 0.02 | 0.00 | 0.00 | -0.14 |
| 1917 | EEF1A2   | 0.08 | 0.00 | 0.05 | 0.10  |
| 1933 | EEF1B2   | 0.00 | 0.00 | 0.00 | NaN   |
| 1936 | EEF1D    | 0.10 | 0.00 | 0.15 | 0.19  |
| 1937 | EEF1G    | 0.00 | 0.00 | 0.05 | 0.07  |
| 1938 | EEF2     | 0.02 | 0.00 | 0.15 | -0.04 |
| 1939 | LGTN     | 0.00 | 0.00 | 0.05 | -0.22 |
| 1942 | EFNA1    | 0.04 | 0.00 | 0.15 | 0.07  |
| 1943 | EFNA2    | 0.02 | 0.00 | 0.05 | -0.02 |
| 1944 | EFNA3    | 0.04 | 0.00 | 0.15 | 0.00  |
| 1945 | EFNA4    | 0.04 | 0.00 | 0.15 | 0.19  |
| 1946 | EFNA5    | 0.02 | 0.00 | 0.00 | -0.11 |
| 1948 | EFNB2    | 0.02 | 0.00 | 0.05 | 0.14  |
| 1949 | EFNB3    | 0.00 | 0.00 | 0.00 | NaN   |
| 1950 | EGF      | 0.08 | 0.00 | 0.00 | -0.01 |
| 1951 | CELSR3   | 0.00 | 0.00 | 0.05 | 0.09  |
| 1952 | CELSR2   | 0.00 | 0.00 | 0.00 | NaN   |
| 1956 | EGFR     | 0.02 | 0.00 | 0.05 | -0.02 |
| 1958 | EGR1     | 0.00 | 0.00 | 0.00 | NaN   |
| 1959 | EGR2     | 0.00 | 0.00 | 0.00 | NaN   |
| 1960 | EGR3     | 0.00 | 0.00 | 0.05 | -0.09 |
| 1961 | EGR4     | 0.00 | 0.00 | 0.05 | -0.07 |
| 1962 | EHHADH   | 0.02 | 0.14 | 0.00 | -0.15 |
| 1965 | EIF2S1   | 0.00 | 0.00 | 0.05 | 0.15  |
| 1967 | EIF2B1   | 0.02 | 0.00 | 0.10 | 0.04  |
| 1969 | EPHA2    | 0.02 | 0.00 | 0.00 | -0.06 |
| 1973 | EIF4A1   | 0.02 | 0.00 | 0.00 | -0.10 |
| 1974 | EIF4A2   | 0.02 | 0.14 | 0.00 | -0.07 |
| 1975 | EIF4B    | 0.00 | 0.00 | 0.00 | NaN   |
| 1977 | EIF4E    | 0.00 | 0.00 | 0.00 | NaN   |
| 1978 | EIF4EBP1 | 0.12 | 0.14 | 0.05 | 0.31  |
| 1979 | EIF4EBP2 | 0.00 | 0.00 | 0.00 | NaN   |
| 1981 | EIF4G1   | 0.02 | 0.14 | 0.00 | -0.06 |
| 1982 | EIF4G2   | 0.02 | 0.00 | 0.00 | 0.04  |
| 1983 | EIF5     | 0.00 | 0.00 | 0.05 | 0.03  |
| 1984 | EIF5A    | 0.02 | 0.00 | 0.00 | 0.03  |
| 1990 | ELA1     | 0.00 | 0.00 | 0.00 | NaN   |
| 1991 | ELA2     | 0.06 | 0.00 | 0.15 | 0.02  |
| 1993 | ELAVL2   | 0.02 | 0.14 | 0.10 | -0.02 |

|      |         |      |      |      |       |
|------|---------|------|------|------|-------|
| 1994 | ELAVL1  | 0.02 | 0.00 | 0.15 | 0.25  |
| 1995 | ELAVL3  | 0.02 | 0.00 | 0.00 | 0.03  |
| 1996 | ELAVL4  | 0.02 | 0.00 | 0.00 | -0.04 |
| 1997 | ELF1    | 0.00 | 0.00 | 0.00 | NaN   |
| 1998 | ELF2    | 0.00 | 0.00 | 0.05 | 0.10  |
| 1999 | ELF3    | 0.02 | 0.00 | 0.00 | 0.08  |
| 2001 | ELF5    | 0.02 | 0.00 | 0.00 | 0.03  |
| 2004 | ELK3    | 0.02 | 0.00 | 0.00 | 0.00  |
| 2005 | ELK4    | 0.02 | 0.00 | 0.05 | 0.02  |
| 2006 | ELN     | 0.00 | 0.00 | 0.00 | NaN   |
| 2009 | EML1    | 0.04 | 0.00 | 0.00 | -0.11 |
| 2012 | EMP1    | 0.04 | 0.00 | 0.00 | -0.09 |
| 2013 | EMP2    | 0.00 | 0.00 | 0.00 | NaN   |
| 2014 | EMP3    | 0.02 | 0.00 | 0.00 | -0.11 |
| 2015 | EMR1    | 0.02 | 0.00 | 0.15 | 0.30  |
| 2016 | EMX1    | 0.00 | 0.00 | 0.05 | -0.13 |
| 2018 | EMX2    | 0.04 | 0.14 | 0.05 | -0.02 |
| 2019 | EN1     | 0.00 | 0.00 | 0.10 | 0.15  |
| 2020 | EN2     | 0.00 | 0.00 | 0.05 | 0.00  |
| 2021 | ENDOG   | 0.00 | 0.00 | 0.00 | NaN   |
| 2022 | ENG     | 0.02 | 0.00 | 0.00 | 0.14  |
| 2023 | ENO1    | 0.00 | 0.00 | 0.00 | NaN   |
| 2026 | ENO2    | 0.02 | 0.00 | 0.15 | 0.23  |
| 2027 | ENO3    | 0.04 | 0.00 | 0.10 | 0.10  |
| 2028 | ENPEP   | 0.08 | 0.00 | 0.00 | 0.18  |
| 2029 | ENSA    | 0.02 | 0.00 | 0.10 | -0.01 |
| 2030 | SLC29A1 | 0.04 | 0.14 | 0.20 | -0.10 |
| 2033 | EP300   | 0.00 | 0.14 | 0.00 | -0.06 |
| 2034 | EPAS1   | 0.00 | 0.00 | 0.00 | NaN   |
| 2035 | EPB41   | 0.04 | 0.00 | 0.00 | 0.28  |
| 2037 | EPB41L2 | 0.02 | 0.00 | 0.10 | 0.16  |
| 2038 | EPB42   | 0.04 | 0.00 | 0.00 | -0.14 |
| 2039 | EPB49   | 0.00 | 0.00 | 0.05 | 0.00  |
| 2041 | EPHA1   | 0.00 | 0.14 | 0.05 | 0.12  |
| 2042 | EPHA3   | 0.16 | 0.14 | 0.30 | 0.18  |
| 2043 | EPHA4   | 0.04 | 0.00 | 0.00 | 0.00  |
| 2044 | EPHA5   | 0.06 | 0.00 | 0.00 | 0.04  |
| 2045 | EPHA7   | 0.08 | 0.00 | 0.00 | -0.04 |
| 2047 | EPHB1   | 0.00 | 0.00 | 0.10 | 0.32  |
| 2048 | EPHB2   | 0.02 | 0.00 | 0.00 | 0.08  |
| 2049 | EPHB3   | 0.02 | 0.14 | 0.00 | -0.13 |
| 2050 | EPHB4   | 0.00 | 0.00 | 0.00 | NaN   |
| 2051 | EPHB6   | 0.00 | 0.14 | 0.05 | 0.07  |
| 2052 | EPHX1   | 0.00 | 0.00 | 0.05 | 0.14  |
| 2053 | EPHX2   | 0.04 | 0.00 | 0.10 | -0.12 |
| 2055 | CLN8    | 0.00 | 0.00 | 0.00 | NaN   |
| 2056 | EPO     | 0.00 | 0.00 | 0.00 | NaN   |

|      |       |      |      |      |       |
|------|-------|------|------|------|-------|
| 2057 | EPOR  | 0.02 | 0.00 | 0.00 | 0.01  |
| 2058 | EPRS  | 0.02 | 0.00 | 0.00 | 0.07  |
| 2059 | EPS8  | 0.02 | 0.00 | 0.00 | 0.11  |
| 2060 | EPS15 | 0.02 | 0.00 | 0.00 | 0.19  |
| 2063 | NR2F6 | 0.04 | 0.00 | 0.00 | 0.45  |
| 2064 | ERBB2 | 0.02 | 0.86 | 0.05 | 0.71  |
| 2065 | ERBB3 | 0.02 | 0.00 | 0.05 | 0.04  |
| 2066 | ERBB4 | 0.02 | 0.00 | 0.05 | 0.06  |
| 2067 | ERCC1 | 0.00 | 0.00 | 0.00 | NaN   |
| 2068 | ERCC2 | 0.00 | 0.00 | 0.00 | NaN   |
| 2069 | EREG  | 0.00 | 0.00 | 0.05 | -0.02 |
| 2070 | EYA4  | 0.00 | 0.00 | 0.00 | NaN   |
| 2071 | ERCC3 | 0.00 | 0.00 | 0.10 | -0.08 |
| 2072 | ERCC4 | 0.02 | 0.00 | 0.05 | -0.01 |
| 2073 | ERCC5 | 0.02 | 0.00 | 0.00 | 0.07  |
| 2074 | ERCC6 | 0.02 | 0.00 | 0.05 | 0.10  |
| 2077 | ERF   | 0.00 | 0.00 | 0.05 | -0.14 |
| 2078 | ERG   | 0.00 | 0.00 | 0.00 | NaN   |
| 2079 | ERH   | 0.02 | 0.00 | 0.05 | -0.07 |
| 2081 | ERN1  | 0.12 | 0.00 | 0.20 | 0.09  |
| 2098 | ESD   | 0.00 | 0.00 | 0.00 | NaN   |
| 2099 | ESR1  | 0.02 | 0.00 | 0.05 | 0.00  |
| 2100 | ESR2  | 0.06 | 0.00 | 0.00 | 0.17  |
| 2101 | ESRRA | 0.02 | 0.00 | 0.00 | 0.03  |
| 2103 | ESRRB | 0.00 | 0.00 | 0.00 | NaN   |
| 2104 | ESRRG | 0.00 | 0.00 | 0.00 | NaN   |
| 2107 | ETF1  | 0.00 | 0.00 | 0.00 | NaN   |
| 2108 | ETFA  | 0.00 | 0.00 | 0.05 | -0.07 |
| 2109 | ETFB  | 0.02 | 0.00 | 0.05 | 0.00  |
| 2110 | ETFDH | 0.02 | 0.00 | 0.00 | -0.09 |
| 2113 | ETS1  | 0.02 | 0.00 | 0.00 | 0.03  |
| 2114 | ETS2  | 0.02 | 0.00 | 0.00 | 0.08  |
| 2115 | ETV1  | 0.00 | 0.00 | 0.00 | NaN   |
| 2116 | ETV2  | 0.00 | 0.00 | 0.00 | NaN   |
| 2117 | ETV3  | 0.04 | 0.14 | 0.05 | -0.09 |
| 2119 | ETV5  | 0.02 | 0.14 | 0.00 | -0.04 |
| 2120 | ETV6  | 0.02 | 0.00 | 0.15 | 0.00  |
| 2121 | EVC   | 0.00 | 0.00 | 0.00 | NaN   |
| 2122 | EVI1  | 0.00 | 0.00 | 0.00 | NaN   |
| 2123 | EVI2A | 0.10 | 0.00 | 0.05 | -0.12 |
| 2124 | EVI2B | 0.10 | 0.00 | 0.05 | -0.16 |
| 2125 | EVPL  | 0.02 | 0.14 | 0.05 | 0.13  |
| 2128 | EVX1  | 0.00 | 0.00 | 0.00 | NaN   |
| 2130 | EWSR1 | 0.00 | 0.14 | 0.05 | 0.28  |
| 2131 | EXT1  | 0.10 | 0.00 | 0.15 | -0.03 |
| 2132 | EXT2  | 0.00 | 0.00 | 0.00 | NaN   |
| 2134 | EXTL1 | 0.02 | 0.00 | 0.05 | 0.02  |

|      |        |      |      |      |       |
|------|--------|------|------|------|-------|
| 2135 | EXTL2  | 0.02 | 0.00 | 0.00 | 0.06  |
| 2137 | EXTL3  | 0.00 | 0.00 | 0.00 | NaN   |
| 2138 | EYA1   | 0.04 | 0.14 | 0.00 | 0.01  |
| 2139 | EYA2   | 0.02 | 0.00 | 0.00 | -0.03 |
| 2140 | EYA3   | 0.04 | 0.00 | 0.00 | 0.45  |
| 2145 | EZH1   | 0.02 | 0.86 | 0.05 | -0.02 |
| 2146 | EZH2   | 0.06 | 0.00 | 0.15 | 0.28  |
| 2147 | F2     | 0.02 | 0.00 | 0.00 | -0.06 |
| 2149 | F2R    | 0.04 | 0.00 | 0.05 | 0.18  |
| 2150 | F2RL1  | 0.04 | 0.00 | 0.05 | 0.04  |
| 2151 | F2RL2  | 0.04 | 0.00 | 0.05 | -0.08 |
| 2152 | F3     | 0.00 | 0.00 | 0.00 | NaN   |
| 2153 | F5     | 0.02 | 0.00 | 0.00 | 0.07  |
| 2155 | F7     | 0.06 | 0.00 | 0.00 | 0.12  |
| 2159 | F10    | 0.06 | 0.00 | 0.00 | 0.08  |
| 2160 | F11    | 0.00 | 0.00 | 0.00 | NaN   |
| 2161 | F12    | 0.00 | 0.29 | 0.00 | 0.35  |
| 2162 | F13A1  | 0.02 | 0.00 | 0.00 | -0.18 |
| 2165 | F13B   | 0.00 | 0.00 | 0.00 | NaN   |
| 2166 | FAAH   | 0.02 | 0.00 | 0.05 | 0.22  |
| 2167 | FABP4  | 0.06 | 0.00 | 0.15 | -0.19 |
| 2168 | FABP1  | 0.04 | 0.00 | 0.05 | -0.04 |
| 2169 | FABP2  | 0.00 | 0.00 | 0.00 | NaN   |
| 2170 | FABP3  | 0.00 | 0.14 | 0.00 | 0.01  |
| 2171 | FABP5  | 0.06 | 0.00 | 0.00 | -0.02 |
| 2172 | FABP6  | 0.00 | 0.00 | 0.00 | NaN   |
| 2173 | FABP7  | 0.08 | 0.00 | 0.00 | -0.03 |
| 2175 | FANCA  | 0.00 | 0.00 | 0.10 | 0.27  |
| 2176 | FANCC  | 0.00 | 0.00 | 0.00 | NaN   |
| 2178 | FANCE  | 0.04 | 0.00 | 0.00 | 0.01  |
| 2184 | FAH    | 0.02 | 0.00 | 0.00 | 0.01  |
| 2185 | PTK2B  | 0.04 | 0.00 | 0.10 | 0.05  |
| 2188 | FANCF  | 0.02 | 0.00 | 0.00 | 0.12  |
| 2189 | FANCG  | 0.00 | 0.00 | 0.00 | NaN   |
| 2191 | FAP    | 0.02 | 0.00 | 0.00 | 0.03  |
| 2192 | FBLN1  | 0.02 | 0.14 | 0.05 | -0.05 |
| 2196 | FAT2   | 0.00 | 0.14 | 0.00 | 0.12  |
| 2197 | FAU    | 0.02 | 0.00 | 0.00 | 0.02  |
| 2199 | FBLN2  | 0.00 | 0.00 | 0.05 | 0.01  |
| 2200 | FBN1   | 0.02 | 0.00 | 0.00 | -0.14 |
| 2201 | FBN2   | 0.00 | 0.00 | 0.00 | NaN   |
| 2202 | EFEMP1 | 0.02 | 0.00 | 0.05 | -0.18 |
| 2203 | FBP1   | 0.00 | 0.00 | 0.00 | NaN   |
| 2204 | FCAR   | 0.02 | 0.00 | 0.05 | 0.12  |
| 2205 | FCER1A | 0.00 | 0.00 | 0.00 | NaN   |
| 2206 | MS4A1  | 0.00 | 0.00 | 0.05 | -0.06 |
| 2207 | FCER1G | 0.00 | 0.00 | 0.00 | NaN   |

|      |        |      |      |      |       |
|------|--------|------|------|------|-------|
| 2208 | FCER2  | 0.02 | 0.00 | 0.15 | 0.02  |
| 2209 | FCGR1A | 0.02 | 0.00 | 0.00 | 0.04  |
| 2212 | FCGR2A | 0.00 | 0.00 | 0.00 | NaN   |
| 2213 | FCGR2B | 0.00 | 0.00 | 0.00 | NaN   |
| 2214 | FCGR3A | 0.00 | 0.00 | 0.00 | NaN   |
| 2215 | FCGR3B | 0.00 | 0.00 | 0.00 | NaN   |
| 2217 | FCGRT  | 0.02 | 0.00 | 0.05 | 0.03  |
| 2222 | FDFT1  | 0.00 | 0.00 | 0.00 | NaN   |
| 2224 | FDPS   | 0.04 | 0.00 | 0.15 | 0.20  |
| 2230 | FDX1   | 0.02 | 0.00 | 0.05 | 0.27  |
| 2232 | FDXR   | 0.04 | 0.00 | 0.00 | 0.03  |
| 2235 | FECH   | 0.00 | 0.00 | 0.15 | 0.15  |
| 2237 | FEN1   | 0.00 | 0.00 | 0.05 | 0.32  |
| 2241 | FER    | 0.02 | 0.00 | 0.00 | -0.03 |
| 2242 | FES    | 0.02 | 0.00 | 0.10 | -0.05 |
| 2243 | FGA    | 0.00 | 0.00 | 0.00 | NaN   |
| 2244 | FGB    | 0.00 | 0.00 | 0.00 | NaN   |
| 2247 | FGF2   | 0.00 | 0.14 | 0.05 | 0.08  |
| 2248 | FGF3   | 0.12 | 0.00 | 0.05 | 0.33  |
| 2250 | FGF5   | 0.02 | 0.00 | 0.00 | 0.08  |
| 2251 | FGF6   | 0.02 | 0.00 | 0.00 | 0.13  |
| 2252 | FGF7   | 0.00 | 0.14 | 0.00 | -0.10 |
| 2253 | FGF8   | 0.02 | 0.00 | 0.00 | 0.31  |
| 2254 | FGF9   | 0.18 | 0.00 | 0.20 | 0.00  |
| 2259 | FGF14  | 0.00 | 0.00 | 0.00 | NaN   |
| 2260 | FGFR1  | 0.12 | 0.14 | 0.15 | 0.42  |
| 2261 | FGFR3  | 0.02 | 0.00 | 0.00 | 0.09  |
| 2262 | GPC5   | 0.02 | 0.00 | 0.00 | -0.05 |
| 2263 | FGFR2  | 0.02 | 0.00 | 0.00 | 0.05  |
| 2264 | FGFR4  | 0.00 | 0.00 | 0.00 | NaN   |
| 2266 | FGG    | 0.00 | 0.00 | 0.00 | NaN   |
| 2267 | FGL1   | 0.00 | 0.00 | 0.00 | NaN   |
| 2268 | FGR    | 0.04 | 0.00 | 0.00 | 0.09  |
| 2271 | FH     | 0.06 | 0.00 | 0.00 | 0.01  |
| 2272 | FHIT   | 0.02 | 0.00 | 0.05 | 0.32  |
| 2274 | FHL2   | 0.02 | 0.00 | 0.10 | -0.02 |
| 2275 | FHL3   | 0.04 | 0.00 | 0.05 | 0.03  |
| 2280 | FKBP1A | 0.00 | 0.00 | 0.00 | NaN   |
| 2281 | FKBP1B | 0.00 | 0.00 | 0.00 | NaN   |
| 2286 | FKBP2  | 0.02 | 0.00 | 0.00 | 0.05  |
| 2287 | FKBP3  | 0.00 | 0.00 | 0.10 | 0.07  |
| 2288 | FKBP4  | 0.08 | 0.14 | 0.10 | -0.04 |
| 2289 | FKBP5  | 0.04 | 0.00 | 0.00 | -0.08 |
| 2294 | FOXF1  | 0.02 | 0.00 | 0.05 | 0.06  |
| 2297 | FOXD1  | 0.06 | 0.00 | 0.00 | -0.07 |
| 2299 | FOXI1  | 0.02 | 0.00 | 0.00 | -0.12 |
| 2301 | FOXE3  | 0.02 | 0.00 | 0.05 | -0.06 |

|      |        |      |      |      |       |
|------|--------|------|------|------|-------|
| 2302 | FOXJ1  | 0.02 | 0.14 | 0.05 | -0.09 |
| 2303 | FOXC2  | 0.00 | 0.00 | 0.05 | 0.04  |
| 2304 | FOXE1  | 0.04 | 0.00 | 0.00 | -0.07 |
| 2305 | FOXM1  | 0.08 | 0.14 | 0.10 | 0.02  |
| 2306 | FOXD2  | 0.02 | 0.00 | 0.05 | -0.11 |
| 2313 | FLI1   | 0.02 | 0.00 | 0.00 | 0.05  |
| 2314 | FLII   | 0.02 | 0.00 | 0.00 | -0.08 |
| 2315 | MLANA  | 0.02 | 0.00 | 0.00 | -0.05 |
| 2317 | FLNB   | 0.02 | 0.00 | 0.00 | -0.04 |
| 2318 | FLNC   | 0.00 | 0.00 | 0.05 | 0.00  |
| 2319 | FLOT2  | 0.10 | 0.00 | 0.05 | 0.39  |
| 2322 | FLT3   | 0.00 | 0.00 | 0.05 | -0.08 |
| 2323 | FLT3LG | 0.02 | 0.00 | 0.05 | -0.03 |
| 2326 | FMO1   | 0.02 | 0.00 | 0.00 | 0.05  |
| 2327 | FMO2   | 0.02 | 0.00 | 0.00 | -0.01 |
| 2328 | FMO3   | 0.02 | 0.00 | 0.00 | 0.16  |
| 2329 | FMO4   | 0.02 | 0.00 | 0.00 | 0.15  |
| 2330 | FMO5   | 0.02 | 0.00 | 0.00 | 0.00  |
| 2331 | FMOD   | 0.00 | 0.00 | 0.00 | NaN   |
| 2335 | FN1    | 0.02 | 0.00 | 0.00 | -0.05 |
| 2339 | FNTA   | 0.14 | 0.14 | 0.10 | -0.04 |
| 2342 | FNTB   | 0.06 | 0.00 | 0.00 | 0.13  |
| 2346 | FOLH1  | 0.00 | 0.00 | 0.00 | NaN   |
| 2348 | FOLR1  | 0.06 | 0.00 | 0.15 | 0.03  |
| 2350 | FOLR2  | 0.06 | 0.00 | 0.15 | 0.01  |
| 2352 | FOLR3  | 0.06 | 0.00 | 0.15 | 0.12  |
| 2353 | FOS    | 0.00 | 0.00 | 0.00 | NaN   |
| 2354 | FOSB   | 0.00 | 0.00 | 0.00 | NaN   |
| 2355 | FOSL2  | 0.00 | 0.00 | 0.00 | NaN   |
| 2356 | FPGS   | 0.02 | 0.00 | 0.00 | 0.00  |
| 2357 | FPR1   | 0.02 | 0.00 | 0.05 | 0.06  |
| 2444 | FRK    | 0.06 | 0.00 | 0.05 | 0.03  |
| 2475 | FRAP1  | 0.02 | 0.00 | 0.00 | 0.20  |
| 2483 | FRG1   | 0.02 | 0.00 | 0.05 | -0.09 |
| 2487 | FRZB   | 0.00 | 0.00 | 0.00 | NaN   |
| 2488 | FSHB   | 0.04 | 0.00 | 0.00 | -0.04 |
| 2492 | FSHR   | 0.02 | 0.00 | 0.05 | 0.02  |
| 2494 | NR5A2  | 0.06 | 0.14 | 0.15 | -0.03 |
| 2495 | FTH1   | 0.00 | 0.00 | 0.05 | 0.02  |
| 2512 | FTL    | 0.06 | 0.00 | 0.05 | 0.23  |
| 2515 | ADAM2  | 0.12 | 0.14 | 0.15 | -0.04 |
| 2516 | NR5A1  | 0.06 | 0.00 | 0.00 | -0.16 |
| 2517 | FUCA1  | 0.02 | 0.00 | 0.05 | -0.01 |
| 2521 | FUS    | 0.02 | 0.00 | 0.00 | 0.01  |
| 2523 | FUT1   | 0.06 | 0.00 | 0.05 | 0.28  |
| 2524 | FUT2   | 0.06 | 0.00 | 0.05 | 0.14  |
| 2525 | FUT3   | 0.02 | 0.00 | 0.15 | -0.05 |

|      |        |      |      |      |       |
|------|--------|------|------|------|-------|
| 2526 | FUT4   | 0.00 | 0.00 | 0.00 | NaN   |
| 2527 | FUT5   | 0.02 | 0.00 | 0.15 | -0.08 |
| 2528 | FUT6   | 0.02 | 0.00 | 0.15 | -0.01 |
| 2530 | FUT8   | 0.06 | 0.00 | 0.00 | -0.08 |
| 2533 | FYB    | 0.04 | 0.00 | 0.00 | 0.27  |
| 2534 | FYN    | 0.02 | 0.00 | 0.00 | 0.07  |
| 2535 | FZD2   | 0.00 | 0.00 | 0.05 | 0.11  |
| 2538 | G6PC   | 0.00 | 0.86 | 0.00 | 0.22  |
| 2548 | GAA    | 0.00 | 0.14 | 0.00 | -0.16 |
| 2549 | GAB1   | 0.00 | 0.00 | 0.00 | NaN   |
| 2550 | GABBR1 | 0.04 | 0.14 | 0.05 | -0.03 |
| 2551 | GABPA  | 0.02 | 0.00 | 0.05 | -0.05 |
| 2552 | GABPB1 | 0.00 | 0.00 | 0.00 | NaN   |
| 2553 | GABPB2 | 0.02 | 0.00 | 0.10 | -0.14 |
| 2554 | GABRA1 | 0.00 | 0.00 | 0.00 | NaN   |
| 2555 | GABRA2 | 0.00 | 0.29 | 0.10 | -0.06 |
| 2557 | GABRA4 | 0.00 | 0.29 | 0.10 | -0.09 |
| 2558 | GABRA5 | 0.02 | 0.00 | 0.10 | 0.33  |
| 2559 | GABRA6 | 0.00 | 0.00 | 0.00 | NaN   |
| 2560 | GABRB1 | 0.00 | 0.29 | 0.10 | -0.04 |
| 2561 | GABRB2 | 0.00 | 0.00 | 0.00 | NaN   |
| 2562 | GABRB3 | 0.02 | 0.00 | 0.10 | 0.01  |
| 2566 | GABRG2 | 0.00 | 0.00 | 0.00 | NaN   |
| 2567 | GABRG3 | 0.02 | 0.00 | 0.10 | 0.07  |
| 2568 | GABRP  | 0.02 | 0.00 | 0.00 | -0.06 |
| 2569 | GABRR1 | 0.00 | 0.00 | 0.05 | -0.04 |
| 2570 | GABRR2 | 0.00 | 0.00 | 0.05 | 0.03  |
| 2571 | GAD1   | 0.00 | 0.00 | 0.00 | NaN   |
| 2572 | GAD2   | 0.00 | 0.00 | 0.00 | NaN   |
| 2580 | GAK    | 0.06 | 0.00 | 0.05 | -0.01 |
| 2581 | GALC   | 0.00 | 0.00 | 0.00 | NaN   |
| 2582 | GALE   | 0.02 | 0.00 | 0.05 | 0.03  |
| 2584 | GALK1  | 0.02 | 0.14 | 0.05 | -0.02 |
| 2585 | GALK2  | 0.02 | 0.00 | 0.00 | 0.10  |
| 2586 | GAL    | 0.02 | 0.00 | 0.05 | 0.35  |
| 2587 | GALR1  | 0.02 | 0.00 | 0.00 | -0.09 |
| 2588 | GALNS  | 0.00 | 0.00 | 0.10 | 0.14  |
| 2589 | GALNT1 | 0.04 | 0.00 | 0.05 | 0.17  |
| 2590 | GALNT2 | 0.00 | 0.00 | 0.05 | -0.22 |
| 2591 | GALNT3 | 0.02 | 0.00 | 0.00 | 0.13  |
| 2592 | GALT   | 0.00 | 0.00 | 0.00 | NaN   |
| 2593 | GAMT   | 0.02 | 0.00 | 0.05 | -0.12 |
| 2596 | GAP43  | 0.02 | 0.00 | 0.00 | -0.05 |
| 2617 | GARS   | 0.00 | 0.00 | 0.00 | NaN   |
| 2618 | GART   | 0.00 | 0.00 | 0.00 | NaN   |
| 2619 | GAS1   | 0.00 | 0.00 | 0.00 | NaN   |
| 2620 | GAS2   | 0.02 | 0.00 | 0.00 | -0.04 |

|      |         |      |      |      |       |
|------|---------|------|------|------|-------|
| 2624 | GATA2   | 0.04 | 0.00 | 0.00 | 0.13  |
| 2625 | GATA3   | 0.00 | 0.00 | 0.20 | -0.36 |
| 2626 | GATA4   | 0.00 | 0.00 | 0.00 | NaN   |
| 2627 | GATA6   | 0.00 | 0.14 | 0.00 | -0.01 |
| 2628 | GATM    | 0.02 | 0.00 | 0.05 | 0.10  |
| 2629 | GBA     | 0.04 | 0.00 | 0.15 | 0.01  |
| 2631 | GBAS    | 0.04 | 0.14 | 0.20 | -0.07 |
| 2632 | GBE1    | 0.16 | 0.14 | 0.30 | -0.15 |
| 2633 | GBP1    | 0.04 | 0.00 | 0.05 | 0.12  |
| 2634 | GBP2    | 0.04 | 0.00 | 0.05 | 0.13  |
| 2637 | GBX2    | 0.00 | 0.00 | 0.00 | NaN   |
| 2638 | GC      | 0.02 | 0.00 | 0.05 | -0.04 |
| 2639 | GCDH    | 0.00 | 0.14 | 0.05 | -0.05 |
| 2641 | GCG     | 0.02 | 0.00 | 0.00 | 0.10  |
| 2643 | GCH1    | 0.00 | 0.00 | 0.10 | 0.21  |
| 2644 | GCHFR   | 0.00 | 0.00 | 0.00 | NaN   |
| 2645 | GCK     | 0.00 | 0.00 | 0.00 | NaN   |
| 2646 | GCKR    | 0.00 | 0.00 | 0.00 | NaN   |
| 2649 | NR6A1   | 0.06 | 0.00 | 0.00 | 0.24  |
| 2650 | GCNT1   | 0.00 | 0.00 | 0.05 | 0.01  |
| 2651 | GCNT2   | 0.04 | 0.00 | 0.00 | 0.00  |
| 2653 | GCSH    | 0.02 | 0.00 | 0.00 | -0.04 |
| 2657 | GDF1    | 0.02 | 0.00 | 0.00 | 0.07  |
| 2658 | GDF2    | 0.02 | 0.00 | 0.10 | 0.07  |
| 2661 | GDF9    | 0.00 | 0.00 | 0.00 | NaN   |
| 2662 | GDF10   | 0.02 | 0.00 | 0.10 | -0.10 |
| 2665 | GDI2    | 0.00 | 0.00 | 0.00 | NaN   |
| 2668 | GNDF    | 0.04 | 0.00 | 0.15 | -0.04 |
| 2669 | GEM     | 0.08 | 0.00 | 0.05 | -0.11 |
| 2670 | GFAP    | 0.00 | 0.00 | 0.05 | 0.23  |
| 2671 | GFER    | 0.18 | 0.00 | 0.10 | -0.06 |
| 2672 | GFI1    | 0.00 | 0.00 | 0.00 | NaN   |
| 2673 | GFPT1   | 0.00 | 0.14 | 0.00 | 0.10  |
| 2674 | GFRA1   | 0.04 | 0.14 | 0.05 | -0.14 |
| 2675 | GFRA2   | 0.00 | 0.00 | 0.05 | 0.07  |
| 2676 | GFRA3   | 0.02 | 0.00 | 0.00 | 0.01  |
| 2677 | GGCX    | 0.00 | 0.00 | 0.00 | NaN   |
| 2678 | GGT1    | 0.00 | 0.14 | 0.05 | 0.12  |
| 2683 | B4GALT1 | 0.00 | 0.00 | 0.05 | 0.03  |
| 2688 | GH1     | 0.12 | 0.00 | 0.20 | 0.07  |
| 2689 | GH2     | 0.12 | 0.00 | 0.20 | 0.06  |
| 2690 | GHR     | 0.18 | 0.00 | 0.30 | 0.08  |
| 2691 | GHRH    | 0.04 | 0.00 | 0.00 | -0.03 |
| 2692 | GHRHR   | 0.00 | 0.00 | 0.00 | NaN   |
| 2693 | GHSR    | 0.06 | 0.00 | 0.00 | -0.01 |
| 2694 | GIF     | 0.00 | 0.00 | 0.00 | NaN   |
| 2695 | GIP     | 0.04 | 0.00 | 0.05 | -0.04 |



|      |       |      |      |      |       |
|------|-------|------|------|------|-------|
| 2696 | GIPR  | 0.00 | 0.00 | 0.05 | -0.07 |
| 2697 | GJA1  | 0.08 | 0.00 | 0.00 | -0.26 |
| 2701 | GJA4  | 0.00 | 0.00 | 0.00 | NaN   |
| 2702 | GJA5  | 0.02 | 0.00 | 0.00 | 0.01  |
| 2703 | GJA8  | 0.02 | 0.00 | 0.00 | -0.06 |
| 2707 | GJB3  | 0.00 | 0.00 | 0.00 | NaN   |
| 2709 | GJB5  | 0.02 | 0.00 | 0.00 | -0.08 |
| 2720 | GLB1  | 0.06 | 0.00 | 0.05 | 0.09  |
| 2729 | GCLC  | 0.02 | 0.00 | 0.00 | -0.04 |
| 2730 | GCLM  | 0.00 | 0.00 | 0.00 | NaN   |
| 2731 | GLDC  | 0.02 | 0.00 | 0.00 | 0.23  |
| 2734 | GLG1  | 0.00 | 0.00 | 0.00 | NaN   |
| 2736 | GLI2  | 0.00 | 0.00 | 0.10 | 0.04  |
| 2737 | GLI3  | 0.00 | 0.00 | 0.00 | NaN   |
| 2739 | GLO1  | 0.00 | 0.00 | 0.00 | NaN   |
| 2740 | GLP1R | 0.00 | 0.00 | 0.00 | NaN   |
| 2741 | GLRA1 | 0.00 | 0.14 | 0.00 | 0.38  |
| 2743 | GLRB  | 0.00 | 0.14 | 0.00 | -0.05 |
| 2744 | GLS   | 0.00 | 0.00 | 0.05 | -0.04 |
| 2745 | GLRX  | 0.00 | 0.00 | 0.00 | NaN   |
| 2746 | GLUD1 | 0.00 | 0.00 | 0.05 | 0.10  |
| 2752 | GLUL  | 0.02 | 0.00 | 0.00 | 0.02  |
| 2760 | GM2A  | 0.00 | 0.14 | 0.00 | 0.08  |
| 2764 | GMFB  | 0.00 | 0.00 | 0.05 | -0.03 |
| 2765 | GML   | 0.10 | 0.00 | 0.15 | 0.04  |
| 2766 | GMPR  | 0.00 | 0.00 | 0.00 | NaN   |
| 2767 | GNA11 | 0.02 | 0.00 | 0.15 | -0.09 |
| 2769 | GNA15 | 0.02 | 0.00 | 0.15 | 0.01  |
| 2770 | GNAI1 | 0.00 | 0.00 | 0.00 | NaN   |
| 2771 | GNAI2 | 0.00 | 0.00 | 0.05 | -0.08 |
| 2773 | GNAI3 | 0.00 | 0.00 | 0.00 | NaN   |
| 2774 | GNAL  | 0.04 | 0.00 | 0.10 | 0.07  |
| 2775 | GNAO1 | 0.02 | 0.00 | 0.00 | -0.05 |
| 2776 | GNAQ  | 0.00 | 0.00 | 0.05 | -0.04 |
| 2778 | GNAS  | 0.12 | 0.00 | 0.00 | 0.43  |
| 2779 | GNAT1 | 0.00 | 0.00 | 0.05 | -0.05 |
| 2780 | GNAT2 | 0.00 | 0.00 | 0.00 | NaN   |
| 2781 | GNAZ  | 0.06 | 0.14 | 0.15 | 0.22  |
| 2783 | GNB2  | 0.00 | 0.00 | 0.00 | NaN   |
| 2784 | GNB3  | 0.02 | 0.00 | 0.15 | 0.07  |
| 2785 | GNG3  | 0.00 | 0.00 | 0.05 | -0.02 |
| 2786 | GNG4  | 0.00 | 0.00 | 0.00 | NaN   |
| 2787 | GNG5  | 0.04 | 0.00 | 0.05 | 0.00  |
| 2788 | GNG7  | 0.00 | 0.00 | 0.00 | NaN   |
| 2790 | GNG10 | 0.02 | 0.00 | 0.00 | 0.02  |
| 2791 | GNG11 | 0.02 | 0.00 | 0.00 | 0.02  |
| 2792 | GNGT1 | 0.02 | 0.00 | 0.00 | -0.10 |

|      |        |      |      |      |       |
|------|--------|------|------|------|-------|
| 2794 | GNL1   | 0.04 | 0.14 | 0.05 | 0.07  |
| 2796 | GNRH1  | 0.02 | 0.00 | 0.00 | -0.01 |
| 2797 | GNRH2  | 0.00 | 0.00 | 0.00 | NaN   |
| 2798 | GNRHR  | 0.00 | 0.00 | 0.05 | 0.22  |
| 2799 | GNS    | 0.06 | 0.00 | 0.00 | 0.26  |
| 2800 | GOLGA1 | 0.06 | 0.00 | 0.00 | 0.06  |
| 2801 | GOLGA2 | 0.00 | 0.00 | 0.00 | NaN   |
| 2802 | GOLGA3 | 0.08 | 0.14 | 0.05 | -0.09 |
| 2803 | GOLGA4 | 0.02 | 0.14 | 0.10 | 0.02  |
| 2804 | GOLGB1 | 0.00 | 0.00 | 0.10 | 0.14  |
| 2805 | GOT1   | 0.00 | 0.00 | 0.00 | NaN   |
| 2806 | GOT2   | 0.04 | 0.00 | 0.05 | -0.06 |
| 2810 | SFN    | 0.06 | 0.00 | 0.05 | -0.08 |
| 2811 | GP1BA  | 0.04 | 0.00 | 0.10 | 0.02  |
| 2812 | GP1BB  | 0.06 | 0.14 | 0.15 | 0.06  |
| 2813 | GP2    | 0.00 | 0.00 | 0.00 | NaN   |
| 2814 | GP5    | 0.02 | 0.00 | 0.00 | -0.12 |
| 2815 | GP9    | 0.02 | 0.00 | 0.00 | 0.06  |
| 2817 | GPC1   | 0.08 | 0.43 | 0.10 | 0.01  |
| 2819 | GPD1   | 0.02 | 0.00 | 0.00 | -0.04 |
| 2820 | GPD2   | 0.00 | 0.00 | 0.00 | NaN   |
| 2821 | GPI    | 0.00 | 0.00 | 0.00 | NaN   |
| 2822 | GPLD1  | 0.00 | 0.00 | 0.00 | NaN   |
| 2823 | GPM6A  | 0.00 | 0.14 | 0.00 | -0.03 |
| 2825 | GPR1   | 0.00 | 0.00 | 0.00 | NaN   |
| 2827 | GPR3   | 0.04 | 0.00 | 0.00 | 0.26  |
| 2828 | GPR4   | 0.00 | 0.00 | 0.05 | -0.10 |
| 2835 | GPR12  | 0.00 | 0.00 | 0.05 | -0.10 |
| 2838 | GPR15  | 0.16 | 0.14 | 0.30 | -0.02 |
| 2840 | GPR17  | 0.00 | 0.00 | 0.10 | 0.23  |
| 2841 | GPR18  | 0.00 | 0.00 | 0.05 | -0.07 |
| 2842 | GPR19  | 0.04 | 0.00 | 0.05 | -0.04 |
| 2843 | GPR20  | 0.10 | 0.00 | 0.15 | -0.03 |
| 2844 | GPR21  | 0.06 | 0.00 | 0.00 | 0.08  |
| 2845 | GPR22  | 0.00 | 0.00 | 0.00 | NaN   |
| 2848 | GPR25  | 0.00 | 0.00 | 0.05 | -0.12 |
| 2850 | GPR27  | 0.02 | 0.00 | 0.00 | -0.06 |
| 2853 | GPR31  | 0.02 | 0.00 | 0.05 | -0.21 |
| 2854 | GPR32  | 0.00 | 0.00 | 0.00 | NaN   |
| 2859 | GPR35  | 0.08 | 0.43 | 0.10 | -0.09 |
| 2861 | GPR37  | 0.00 | 0.00 | 0.00 | NaN   |
| 2863 | GPR39  | 0.00 | 0.00 | 0.10 | 0.34  |
| 2873 | GPS1   | 0.00 | 0.00 | 0.00 | NaN   |
| 2874 | GPS2   | 0.02 | 0.00 | 0.00 | -0.16 |
| 2875 | GPT    | 0.10 | 0.00 | 0.15 | 0.31  |
| 2876 | GPX1   | 0.06 | 0.00 | 0.05 | 0.15  |
| 2877 | GPX2   | 0.06 | 0.00 | 0.00 | 0.39  |

|      |        |      |      |      |       |
|------|--------|------|------|------|-------|
| 2878 | GPX3   | 0.00 | 0.14 | 0.00 | 0.03  |
| 2879 | GPX4   | 0.02 | 0.00 | 0.05 | 0.07  |
| 2880 | GPX5   | 0.04 | 0.14 | 0.05 | -0.13 |
| 2885 | GRB2   | 0.02 | 0.14 | 0.00 | 0.36  |
| 2886 | GRB7   | 0.02 | 0.86 | 0.05 | 0.70  |
| 2887 | GRB10  | 0.00 | 0.00 | 0.00 | NaN   |
| 2888 | GRB14  | 0.02 | 0.00 | 0.00 | -0.06 |
| 2890 | GRIA1  | 0.02 | 0.00 | 0.00 | 0.06  |
| 2891 | GRIA2  | 0.04 | 0.00 | 0.00 | 0.32  |
| 2893 | GRIA4  | 0.02 | 0.00 | 0.05 | -0.11 |
| 2895 | GRID2  | 0.02 | 0.00 | 0.00 | 0.00  |
| 2896 | GRN    | 0.00 | 0.00 | 0.00 | NaN   |
| 2897 | GRIK1  | 0.18 | 0.14 | 0.00 | 0.05  |
| 2899 | GRIK3  | 0.04 | 0.00 | 0.05 | -0.09 |
| 2900 | GRIK4  | 0.00 | 0.00 | 0.00 | NaN   |
| 2901 | GRIK5  | 0.00 | 0.00 | 0.05 | 0.36  |
| 2903 | GRIN2A | 0.00 | 0.00 | 0.00 | NaN   |
| 2904 | GRIN2B | 0.04 | 0.00 | 0.00 | 0.05  |
| 2905 | GRIN2C | 0.04 | 0.00 | 0.00 | -0.01 |
| 2906 | GRIN2D | 0.02 | 0.00 | 0.00 | 0.12  |
| 2908 | NR3C1  | 0.00 | 0.00 | 0.00 | NaN   |
| 2909 | GRLF1  | 0.00 | 0.00 | 0.05 | 0.08  |
| 2911 | GRM1   | 0.02 | 0.00 | 0.05 | 0.02  |
| 2912 | GRM2   | 0.00 | 0.00 | 0.10 | -0.11 |
| 2913 | GRM3   | 0.00 | 0.00 | 0.00 | NaN   |
| 2914 | GRM4   | 0.00 | 0.00 | 0.00 | NaN   |
| 2915 | GRM5   | 0.00 | 0.00 | 0.00 | NaN   |
| 2916 | GRM6   | 0.08 | 0.43 | 0.10 | 0.12  |
| 2917 | GRM7   | 0.00 | 0.00 | 0.05 | 0.43  |
| 2918 | GRM8   | 0.02 | 0.00 | 0.00 | -0.04 |
| 2922 | GRP    | 0.00 | 0.00 | 0.05 | -0.05 |
| 2926 | GRSF1  | 0.02 | 0.00 | 0.05 | 0.08  |
| 2931 | GSK3A  | 0.00 | 0.00 | 0.05 | 0.32  |
| 2932 | GSK3B  | 0.00 | 0.00 | 0.10 | -0.04 |
| 2934 | GSN    | 0.06 | 0.00 | 0.00 | 0.07  |
| 2935 | GSPT1  | 0.00 | 0.00 | 0.00 | NaN   |
| 2936 | GSR    | 0.04 | 0.00 | 0.00 | 0.10  |
| 2937 | GSS    | 0.00 | 0.00 | 0.10 | -0.18 |
| 2939 | GSTA2  | 0.02 | 0.00 | 0.00 | 0.01  |
| 2940 | GSTA3  | 0.02 | 0.00 | 0.00 | -0.02 |
| 2941 | GSTA4  | 0.02 | 0.00 | 0.00 | 0.12  |
| 2944 | GSTM1  | 0.00 | 0.00 | 0.00 | NaN   |
| 2946 | GSTM2  | 0.00 | 0.00 | 0.00 | NaN   |
| 2947 | GSTM3  | 0.00 | 0.00 | 0.00 | NaN   |
| 2948 | GSTM4  | 0.00 | 0.00 | 0.00 | NaN   |
| 2949 | GSTM5  | 0.00 | 0.00 | 0.00 | NaN   |
| 2950 | GSTP1  | 0.04 | 0.00 | 0.05 | 0.20  |

|      |         |      |      |      |       |
|------|---------|------|------|------|-------|
| 2952 | GSTT1   | 0.00 | 0.14 | 0.05 | -0.08 |
| 2953 | GSTT2   | 0.00 | 0.14 | 0.05 | -0.04 |
| 2954 | GSTZ1   | 0.00 | 0.00 | 0.00 | NaN   |
| 2956 | MSH6    | 0.02 | 0.00 | 0.05 | 0.34  |
| 2957 | GTF2A1  | 0.02 | 0.00 | 0.00 | -0.13 |
| 2958 | GTF2A2  | 0.00 | 0.00 | 0.00 | NaN   |
| 2960 | GTF2E1  | 0.00 | 0.00 | 0.10 | 0.01  |
| 2961 | GTF2E2  | 0.04 | 0.00 | 0.00 | -0.08 |
| 2962 | GTF2F1  | 0.02 | 0.00 | 0.15 | 0.12  |
| 2963 | GTF2F2  | 0.00 | 0.00 | 0.00 | NaN   |
| 2965 | GTF2H1  | 0.00 | 0.00 | 0.05 | 0.02  |
| 2967 | GTF2H3  | 0.02 | 0.00 | 0.10 | 0.12  |
| 2968 | GTF2H4  | 0.04 | 0.14 | 0.05 | -0.10 |
| 2969 | GTF2I   | 0.00 | 0.00 | 0.00 | NaN   |
| 2971 | GTF3A   | 0.00 | 0.00 | 0.05 | 0.06  |
| 2972 | BRF1    | 0.02 | 0.00 | 0.10 | 0.02  |
| 2974 | GUCY1B2 | 0.04 | 0.00 | 0.00 | 0.38  |
| 2975 | GTF3C1  | 0.06 | 0.14 | 0.00 | -0.01 |
| 2976 | GTF3C2  | 0.00 | 0.00 | 0.00 | NaN   |
| 2977 | GUCY1A2 | 0.04 | 0.00 | 0.00 | -0.14 |
| 2979 | GUCA1B  | 0.06 | 0.00 | 0.05 | 0.08  |
| 2981 | GUCA2B  | 0.02 | 0.00 | 0.05 | 0.02  |
| 2982 | GUCY1A3 | 0.00 | 0.14 | 0.00 | 0.21  |
| 2983 | GUCY1B3 | 0.00 | 0.14 | 0.00 | 0.11  |
| 2984 | GUCY2C  | 0.04 | 0.00 | 0.05 | 0.01  |
| 2987 | GUK1    | 0.00 | 0.00 | 0.05 | -0.01 |
| 2990 | GUSB    | 0.00 | 0.00 | 0.00 | NaN   |
| 2993 | GYP A   | 0.00 | 0.00 | 0.00 | NaN   |
| 2994 | GYP B   | 0.00 | 0.00 | 0.00 | NaN   |
| 2995 | GYP C   | 0.00 | 0.00 | 0.10 | 0.14  |
| 2996 | GYP E   | 0.00 | 0.00 | 0.00 | NaN   |
| 2997 | GYS1    | 0.06 | 0.00 | 0.05 | -0.05 |
| 2998 | GYS2    | 0.02 | 0.00 | 0.05 | -0.14 |
| 3000 | GUCY2D  | 0.00 | 0.00 | 0.00 | NaN   |
| 3001 | GZMA    | 0.00 | 0.14 | 0.05 | -0.01 |
| 3003 | GZMK    | 0.00 | 0.14 | 0.05 | -0.03 |
| 3004 | GZMM    | 0.06 | 0.00 | 0.15 | 0.01  |
| 3005 | H1F0    | 0.00 | 0.14 | 0.00 | 0.02  |
| 3014 | H2AFX   | 0.00 | 0.00 | 0.05 | 0.20  |
| 3015 | H2AFZ   | 0.00 | 0.00 | 0.00 | NaN   |
| 3021 | H3F3B   | 0.02 | 0.14 | 0.05 | 0.18  |
| 3026 | HABP2   | 0.00 | 0.14 | 0.05 | 0.21  |
| 3029 | HAGH    | 0.18 | 0.00 | 0.10 | 0.07  |
| 3030 | HADHA   | 0.00 | 0.00 | 0.00 | NaN   |
| 3032 | HADHB   | 0.00 | 0.00 | 0.00 | NaN   |
| 3034 | HAL     | 0.02 | 0.00 | 0.00 | -0.01 |
| 3035 | HARS    | 0.00 | 0.00 | 0.00 | NaN   |

|      |          |      |      |      |       |
|------|----------|------|------|------|-------|
| 3036 | HAS1     | 0.02 | 0.00 | 0.05 | 0.00  |
| 3037 | HAS2     | 0.10 | 0.00 | 0.15 | 0.22  |
| 3039 | HBA1     | 0.18 | 0.00 | 0.10 | 0.08  |
| 3040 | HBA2     | 0.18 | 0.00 | 0.10 | 0.06  |
| 3043 | HBB      | 0.00 | 0.00 | 0.05 | -0.12 |
| 3045 | HBD      | 0.00 | 0.00 | 0.05 | 0.01  |
| 3046 | HBE1     | 0.00 | 0.00 | 0.00 | NaN   |
| 3047 | HBG1     | 0.00 | 0.00 | 0.05 | -0.05 |
| 3049 | HBQ1     | 0.18 | 0.00 | 0.10 | -0.03 |
| 3050 | HBZ      | 0.18 | 0.00 | 0.10 | -0.09 |
| 3053 | SERPIND1 | 0.06 | 0.14 | 0.15 | -0.16 |
| 3055 | HCK      | 0.04 | 0.00 | 0.15 | -0.04 |
| 3059 | HCLS1    | 0.00 | 0.00 | 0.10 | 0.23  |
| 3060 | HCRT     | 0.02 | 0.86 | 0.05 | 0.21  |
| 3061 | HCRTR1   | 0.00 | 0.14 | 0.00 | -0.15 |
| 3062 | HCRTR2   | 0.02 | 0.00 | 0.00 | -0.08 |
| 3065 | HDAC1    | 0.00 | 0.14 | 0.05 | 0.06  |
| 3066 | HDAC2    | 0.04 | 0.00 | 0.00 | 0.21  |
| 3067 | HDC      | 0.00 | 0.00 | 0.00 | NaN   |
| 3068 | HDGF     | 0.04 | 0.14 | 0.05 | -0.02 |
| 3069 | HDLBP    | 0.08 | 0.43 | 0.10 | 0.08  |
| 3073 | HEXA     | 0.04 | 0.00 | 0.05 | 0.30  |
| 3074 | HEXB     | 0.06 | 0.00 | 0.00 | -0.29 |
| 3077 | HFE      | 0.00 | 0.14 | 0.00 | 0.40  |
| 3081 | HGD      | 0.00 | 0.00 | 0.10 | -0.08 |
| 3082 | HGF      | 0.02 | 0.00 | 0.00 | -0.02 |
| 3083 | HGFAC    | 0.00 | 0.00 | 0.00 | NaN   |
| 3084 | NRG1     | 0.04 | 0.00 | 0.05 | 0.78  |
| 3087 | HHEX     | 0.00 | 0.00 | 0.15 | -0.11 |
| 3090 | HIC1     | 0.04 | 0.00 | 0.05 | -0.06 |
| 3091 | HIF1A    | 0.00 | 0.14 | 0.00 | 0.19  |
| 3092 | HIP1     | 0.00 | 0.00 | 0.00 | NaN   |
| 3094 | HINT1    | 0.00 | 0.00 | 0.00 | NaN   |
| 3096 | HIVEP1   | 0.04 | 0.00 | 0.00 | -0.15 |
| 3098 | HK1      | 0.00 | 0.00 | 0.00 | NaN   |
| 3099 | HK2      | 0.00 | 0.00 | 0.05 | -0.11 |
| 3101 | HK3      | 0.00 | 0.00 | 0.00 | NaN   |
| 3105 | HLA-A    | 0.04 | 0.14 | 0.05 | 0.04  |
| 3106 | HLA-B    | 0.04 | 0.14 | 0.05 | 0.03  |
| 3107 | HLA-C    | 0.04 | 0.14 | 0.05 | 0.05  |
| 3109 | HLA-DMB  | 0.02 | 0.00 | 0.05 | -0.04 |
| 3111 | HLA-DOA  | 0.02 | 0.00 | 0.05 | 0.08  |
| 3112 | HLA-DOB  | 0.02 | 0.00 | 0.05 | -0.07 |
| 3113 | HLA-DPA1 | 0.02 | 0.00 | 0.05 | 0.07  |
| 3115 | HLA-DPB1 | 0.02 | 0.00 | 0.05 | 0.02  |
| 3117 | HLA-DQA1 | 0.02 | 0.00 | 0.05 | 0.17  |
| 3119 | HLA-DQB1 | 0.02 | 0.00 | 0.05 | 0.06  |

|      |          |      |      |      |       |
|------|----------|------|------|------|-------|
| 3122 | HLA-DRA  | 0.02 | 0.00 | 0.05 | -0.06 |
| 3123 | HLA-DRB1 | 0.02 | 0.00 | 0.05 | 0.01  |
| 3127 | HLA-DRB5 | 0.02 | 0.00 | 0.05 | 0.04  |
| 3131 | HLF      | 0.02 | 0.00 | 0.10 | -0.06 |
| 3134 | HLA-F    | 0.04 | 0.14 | 0.05 | 0.04  |
| 3135 | HLA-G    | 0.04 | 0.14 | 0.05 | 0.03  |
| 3141 | HLCS     | 0.00 | 0.00 | 0.00 | NaN   |
| 3145 | HMBS     | 0.00 | 0.00 | 0.05 | 0.26  |
| 3155 | HMGCL    | 0.02 | 0.00 | 0.05 | -0.04 |
| 3156 | HMGCR    | 0.04 | 0.00 | 0.05 | 0.19  |
| 3157 | HMGCS1   | 0.18 | 0.00 | 0.30 | 0.25  |
| 3158 | HMGCS2   | 0.41 | 0.43 | 0.10 | 0.12  |
| 3161 | HMMR     | 0.00 | 0.00 | 0.00 | NaN   |
| 3162 | HMOX1    | 0.00 | 0.29 | 0.05 | -0.11 |
| 3163 | HMOX2    | 0.00 | 0.00 | 0.00 | NaN   |
| 3164 | NR4A1    | 0.00 | 0.00 | 0.00 | NaN   |
| 3172 | HNF4A    | 0.02 | 0.00 | 0.00 | 0.45  |
| 3174 | HNF4G    | 0.06 | 0.00 | 0.00 | 0.02  |
| 3175 | ONECUT1  | 0.00 | 0.00 | 0.00 | NaN   |
| 3176 | HNMT     | 0.02 | 0.00 | 0.00 | 0.03  |
| 3177 | SLC29A2  | 0.04 | 0.00 | 0.05 | -0.16 |
| 3198 | HOXA1    | 0.00 | 0.00 | 0.00 | NaN   |
| 3199 | HOXA2    | 0.00 | 0.00 | 0.00 | NaN   |
| 3200 | HOXA3    | 0.00 | 0.00 | 0.00 | NaN   |
| 3201 | HOXA4    | 0.00 | 0.00 | 0.00 | NaN   |
| 3202 | HOXA5    | 0.00 | 0.00 | 0.00 | NaN   |
| 3203 | HOXA6    | 0.00 | 0.00 | 0.00 | NaN   |
| 3204 | HOXA7    | 0.00 | 0.00 | 0.00 | NaN   |
| 3205 | HOXA9    | 0.00 | 0.00 | 0.00 | NaN   |
| 3206 | HOXA10   | 0.00 | 0.00 | 0.00 | NaN   |
| 3207 | HOXA11   | 0.00 | 0.00 | 0.00 | NaN   |
| 3208 | HPCA     | 0.00 | 0.00 | 0.00 | NaN   |
| 3211 | HOXB1    | 0.04 | 0.00 | 0.05 | 0.05  |
| 3212 | HOXB2    | 0.04 | 0.00 | 0.05 | 0.07  |
| 3213 | HOXB3    | 0.04 | 0.00 | 0.05 | 0.01  |
| 3215 | HOXB5    | 0.04 | 0.00 | 0.05 | -0.03 |
| 3216 | HOXB6    | 0.04 | 0.00 | 0.05 | -0.09 |
| 3217 | HOXB7    | 0.04 | 0.00 | 0.05 | -0.09 |
| 3218 | HOXB8    | 0.04 | 0.00 | 0.05 | -0.07 |
| 3221 | HOXC4    | 0.02 | 0.00 | 0.05 | -0.17 |
| 3222 | HOXC5    | 0.02 | 0.00 | 0.05 | -0.11 |
| 3223 | HOXC6    | 0.02 | 0.00 | 0.05 | -0.17 |
| 3224 | HOXC8    | 0.02 | 0.00 | 0.05 | -0.14 |
| 3226 | HOXC10   | 0.02 | 0.00 | 0.05 | -0.18 |
| 3227 | HOXC11   | 0.02 | 0.00 | 0.05 | -0.10 |
| 3229 | HOXC13   | 0.02 | 0.00 | 0.05 | -0.12 |
| 3231 | HOXD1    | 0.02 | 0.00 | 0.00 | 0.23  |

|      |         |      |      |      |       |
|------|---------|------|------|------|-------|
| 3232 | HOXD3   | 0.02 | 0.00 | 0.00 | -0.06 |
| 3233 | HOXD4   | 0.02 | 0.00 | 0.00 | 0.14  |
| 3235 | HOXD9   | 0.02 | 0.00 | 0.00 | 0.22  |
| 3236 | HOXD10  | 0.02 | 0.00 | 0.00 | -0.07 |
| 3237 | HOXD11  | 0.02 | 0.00 | 0.00 | -0.11 |
| 3238 | HOXD12  | 0.02 | 0.00 | 0.00 | -0.13 |
| 3239 | HOXD13  | 0.02 | 0.00 | 0.00 | 0.10  |
| 3240 | HP      | 0.00 | 0.00 | 0.05 | -0.09 |
| 3241 | HPCAL1  | 0.00 | 0.00 | 0.00 | NaN   |
| 3242 | HPD     | 0.02 | 0.00 | 0.10 | 0.04  |
| 3248 | HPGD    | 0.00 | 0.00 | 0.00 | NaN   |
| 3249 | HPN     | 0.00 | 0.00 | 0.00 | NaN   |
| 3250 | HPR     | 0.00 | 0.00 | 0.05 | 0.03  |
| 3257 | HPS1    | 0.00 | 0.00 | 0.05 | 0.37  |
| 3263 | HPX     | 0.00 | 0.00 | 0.00 | NaN   |
| 3265 | HRAS    | 0.00 | 0.00 | 0.05 | -0.03 |
| 3269 | HRH1    | 0.02 | 0.00 | 0.05 | 0.38  |
| 3270 | HRC     | 0.06 | 0.00 | 0.05 | 0.16  |
| 3273 | HRG     | 0.02 | 0.14 | 0.00 | 0.07  |
| 3274 | HRH2    | 0.00 | 0.00 | 0.00 | NaN   |
| 3281 | HSBP1   | 0.00 | 0.00 | 0.00 | NaN   |
| 3283 | HSD3B1  | 0.41 | 0.43 | 0.10 | 0.08  |
| 3284 | HSD3B2  | 0.41 | 0.43 | 0.10 | 0.08  |
| 3290 | HSD11B1 | 0.02 | 0.00 | 0.00 | -0.04 |
| 3291 | HSD11B2 | 0.02 | 0.00 | 0.00 | -0.04 |
| 3292 | HSD17B1 | 0.02 | 0.86 | 0.05 | 0.27  |
| 3293 | HSD17B3 | 0.00 | 0.00 | 0.00 | NaN   |
| 3294 | HSD17B2 | 0.02 | 0.00 | 0.00 | -0.03 |
| 3295 | HSD17B4 | 0.00 | 0.00 | 0.00 | NaN   |
| 3297 | HSF1    | 0.10 | 0.00 | 0.15 | 0.40  |
| 3298 | HSF2    | 0.08 | 0.00 | 0.00 | 0.05  |
| 3299 | HSF4    | 0.02 | 0.00 | 0.00 | 0.06  |
| 3300 | DNAJB2  | 0.04 | 0.00 | 0.00 | -0.11 |
| 3301 | DNAJA1  | 0.00 | 0.00 | 0.05 | -0.05 |
| 3303 | HSPA1A  | 0.02 | 0.00 | 0.05 | 0.02  |
| 3304 | HSPA1B  | 0.02 | 0.00 | 0.05 | -0.04 |
| 3305 | HSPA1L  | 0.02 | 0.00 | 0.05 | -0.02 |
| 3306 | HSPA2   | 0.06 | 0.00 | 0.00 | 0.09  |
| 3308 | HSPA4   | 0.00 | 0.00 | 0.00 | NaN   |
| 3309 | HSPA5   | 0.06 | 0.00 | 0.00 | -0.12 |
| 3310 | HSPA6   | 0.00 | 0.00 | 0.00 | NaN   |
| 3312 | HSPA8   | 0.00 | 0.00 | 0.00 | NaN   |
| 3315 | HSPB1   | 0.00 | 0.00 | 0.00 | NaN   |
| 3316 | HSPB2   | 0.02 | 0.00 | 0.00 | -0.08 |
| 3321 | IGSF3   | 0.08 | 0.00 | 0.10 | -0.08 |
| 3329 | HSPD1   | 0.00 | 0.00 | 0.05 | -0.04 |
| 3336 | HSPE1   | 0.00 | 0.00 | 0.05 | -0.07 |

|      |        |      |      |      |       |
|------|--------|------|------|------|-------|
| 3337 | DNAJB1 | 0.00 | 0.00 | 0.05 | 0.14  |
| 3338 | DNAJC4 | 0.02 | 0.00 | 0.00 | 0.08  |
| 3339 | HSPG2  | 0.00 | 0.00 | 0.05 | 0.04  |
| 3340 | NDST1  | 0.00 | 0.14 | 0.00 | 0.03  |
| 3346 | HTN1   | 0.00 | 0.14 | 0.00 | 0.08  |
| 3347 | HTN3   | 0.00 | 0.14 | 0.00 | -0.04 |
| 3350 | HTR1A  | 0.04 | 0.00 | 0.05 | 0.08  |
| 3351 | HTR1B  | 0.10 | 0.00 | 0.20 | 0.11  |
| 3352 | HTR1D  | 0.02 | 0.00 | 0.05 | -0.05 |
| 3354 | HTR1E  | 0.00 | 0.00 | 0.05 | 0.29  |
| 3355 | HTR1F  | 0.16 | 0.14 | 0.30 | -0.12 |
| 3356 | HTR2A  | 0.00 | 0.00 | 0.00 | NaN   |
| 3357 | HTR2B  | 0.02 | 0.00 | 0.15 | 0.05  |
| 3359 | HTR3A  | 0.00 | 0.00 | 0.00 | NaN   |
| 3360 | HTR4   | 0.02 | 0.14 | 0.00 | 0.27  |
| 3361 | HTR5A  | 0.00 | 0.14 | 0.00 | -0.09 |
| 3363 | HTR7   | 0.02 | 0.00 | 0.05 | 0.00  |
| 3364 | HUS1   | 0.00 | 0.14 | 0.00 | 0.07  |
| 3373 | HYAL1  | 0.00 | 0.00 | 0.10 | 0.17  |
| 3375 | IAPP   | 0.02 | 0.00 | 0.05 | -0.07 |
| 3376 | IARS   | 0.04 | 0.00 | 0.05 | 0.29  |
| 3381 | IBSP   | 0.02 | 0.00 | 0.00 | 0.00  |
| 3382 | ICA1   | 0.00 | 0.00 | 0.00 | NaN   |
| 3383 | ICAM1  | 0.02 | 0.00 | 0.15 | 0.28  |
| 3384 | ICAM2  | 0.12 | 0.00 | 0.20 | 0.22  |
| 3385 | ICAM3  | 0.02 | 0.00 | 0.15 | 0.12  |
| 3386 | ICAM4  | 0.02 | 0.00 | 0.15 | 0.08  |
| 3396 | ICT1   | 0.04 | 0.00 | 0.00 | -0.03 |
| 3397 | ID1    | 0.04 | 0.00 | 0.15 | 0.03  |
| 3398 | ID2    | 0.00 | 0.00 | 0.00 | NaN   |
| 3399 | ID3    | 0.02 | 0.00 | 0.05 | -0.08 |
| 3400 | ID4    | 0.04 | 0.00 | 0.10 | 0.12  |
| 3416 | IDE    | 0.00 | 0.00 | 0.15 | 0.21  |
| 3417 | IDH1   | 0.02 | 0.00 | 0.05 | 0.03  |
| 3418 | IDH2   | 0.00 | 0.00 | 0.00 | NaN   |
| 3419 | IDH3A  | 0.00 | 0.00 | 0.05 | 0.13  |
| 3420 | IDH3B  | 0.00 | 0.00 | 0.00 | NaN   |
| 3422 | IDI1   | 0.00 | 0.00 | 0.10 | 0.39  |
| 3425 | IDUA   | 0.06 | 0.00 | 0.05 | -0.03 |
| 3428 | IFI16  | 0.00 | 0.00 | 0.00 | NaN   |
| 3429 | IFI27  | 0.00 | 0.00 | 0.00 | NaN   |
| 3430 | IFI35  | 0.00 | 0.86 | 0.00 | -0.03 |
| 3431 | SP110  | 0.02 | 0.00 | 0.15 | 0.04  |
| 3434 | IFIT1  | 0.02 | 0.00 | 0.05 | 0.00  |
| 3439 | IFNA1  | 0.02 | 0.00 | 0.05 | -0.08 |
| 3440 | IFNA2  | 0.02 | 0.00 | 0.05 | 0.07  |
| 3441 | IFNA4  | 0.02 | 0.00 | 0.05 | -0.11 |



|      |         |      |      |      |       |
|------|---------|------|------|------|-------|
| 3442 | IFNA5   | 0.02 | 0.00 | 0.05 | -0.01 |
| 3443 | IFNA6   | 0.02 | 0.00 | 0.05 | -0.01 |
| 3444 | IFNA7   | 0.02 | 0.00 | 0.05 | -0.10 |
| 3445 | IFNA8   | 0.02 | 0.00 | 0.05 | 0.03  |
| 3446 | IFNA10  | 0.02 | 0.00 | 0.05 | -0.10 |
| 3447 | IFNA13  | 0.02 | 0.00 | 0.05 | -0.10 |
| 3448 | IFNA14  | 0.02 | 0.00 | 0.05 | -0.01 |
| 3449 | IFNA16  | 0.02 | 0.00 | 0.05 | -0.06 |
| 3451 | IFNA17  | 0.02 | 0.00 | 0.05 | -0.14 |
| 3452 | IFNA21  | 0.02 | 0.00 | 0.05 | -0.03 |
| 3454 | IFNAR1  | 0.00 | 0.00 | 0.00 | NaN   |
| 3455 | IFNAR2  | 0.00 | 0.00 | 0.00 | NaN   |
| 3456 | IFNB1   | 0.02 | 0.00 | 0.05 | -0.16 |
| 3458 | IFNG    | 0.08 | 0.14 | 0.05 | -0.02 |
| 3459 | IFNGR1  | 0.02 | 0.00 | 0.05 | -0.07 |
| 3460 | IFNGR2  | 0.00 | 0.00 | 0.00 | NaN   |
| 3467 | IFNW1   | 0.02 | 0.00 | 0.05 | -0.12 |
| 3475 | IFRD1   | 0.00 | 0.00 | 0.00 | NaN   |
| 3479 | IGF1    | 0.00 | 0.00 | 0.00 | NaN   |
| 3480 | IGF1R   | 0.16 | 0.00 | 0.10 | 0.18  |
| 3481 | IGF2    | 0.02 | 0.00 | 0.05 | 0.27  |
| 3482 | IGF2R   | 0.02 | 0.00 | 0.05 | 0.24  |
| 3483 | IGFALS  | 0.18 | 0.00 | 0.10 | 0.07  |
| 3484 | IGFBP1  | 0.02 | 0.00 | 0.00 | -0.01 |
| 3485 | IGFBP2  | 0.02 | 0.00 | 0.00 | 0.04  |
| 3486 | IGFBP3  | 0.00 | 0.00 | 0.00 | NaN   |
| 3487 | IGFBP4  | 0.02 | 0.86 | 0.05 | 0.00  |
| 3488 | IGFBP5  | 0.02 | 0.00 | 0.00 | 0.36  |
| 3489 | IGFBP6  | 0.00 | 0.00 | 0.00 | NaN   |
| 3490 | IGFBP7  | 0.06 | 0.00 | 0.00 | 0.22  |
| 3491 | CYR61   | 0.04 | 0.00 | 0.05 | 0.02  |
| 3508 | IGHMBP2 | 0.02 | 0.00 | 0.05 | 0.28  |
| 3543 | IGLL1   | 0.00 | 0.14 | 0.00 | 0.08  |
| 3549 | IHH     | 0.04 | 0.00 | 0.00 | 0.01  |
| 3550 | IK      | 0.00 | 0.00 | 0.00 | NaN   |
| 3551 | IKBKB   | 0.04 | 0.14 | 0.05 | 0.31  |
| 3552 | IL1A    | 0.00 | 0.00 | 0.00 | NaN   |
| 3553 | IL1B    | 0.00 | 0.00 | 0.00 | NaN   |
| 3554 | IL1R1   | 0.02 | 0.00 | 0.10 | 0.14  |
| 3556 | IL1RAP  | 0.00 | 0.00 | 0.05 | -0.08 |
| 3557 | IL1RN   | 0.00 | 0.00 | 0.00 | NaN   |
| 3558 | IL2     | 0.00 | 0.14 | 0.05 | 0.09  |
| 3559 | IL2RA   | 0.00 | 0.00 | 0.00 | NaN   |
| 3560 | IL2RB   | 0.00 | 0.14 | 0.00 | 0.11  |
| 3562 | IL3     | 0.02 | 0.00 | 0.00 | 0.09  |
| 3565 | IL4     | 0.00 | 0.00 | 0.00 | NaN   |
| 3566 | IL4R    | 0.06 | 0.14 | 0.00 | 0.12  |

|      |         |      |      |      |       |
|------|---------|------|------|------|-------|
| 3567 | IL5     | 0.02 | 0.14 | 0.00 | 0.05  |
| 3568 | IL5RA   | 0.00 | 0.00 | 0.05 | 0.06  |
| 3569 | IL6     | 0.00 | 0.00 | 0.10 | 0.04  |
| 3570 | IL6R    | 0.04 | 0.00 | 0.15 | 0.13  |
| 3572 | IL6ST   | 0.00 | 0.14 | 0.05 | -0.07 |
| 3574 | IL7     | 0.02 | 0.00 | 0.00 | -0.01 |
| 3575 | IL7R    | 0.04 | 0.00 | 0.15 | 0.14  |
| 3576 | IL8     | 0.00 | 0.00 | 0.00 | NaN   |
| 3577 | IL8RA   | 0.04 | 0.00 | 0.00 | -0.19 |
| 3578 | IL9     | 0.02 | 0.00 | 0.00 | 0.32  |
| 3579 | IL8RB   | 0.04 | 0.00 | 0.00 | 0.04  |
| 3586 | IL10    | 0.00 | 0.00 | 0.05 | 0.12  |
| 3587 | IL10RA  | 0.00 | 0.00 | 0.00 | NaN   |
| 3588 | IL10RB  | 0.00 | 0.00 | 0.00 | NaN   |
| 3589 | IL11    | 0.02 | 0.00 | 0.05 | 0.07  |
| 3590 | IL11RA  | 0.00 | 0.00 | 0.00 | NaN   |
| 3592 | IL12A   | 0.00 | 0.00 | 0.00 | NaN   |
| 3593 | IL12B   | 0.00 | 0.00 | 0.00 | NaN   |
| 3594 | IL12RB1 | 0.04 | 0.00 | 0.00 | -0.12 |
| 3595 | IL12RB2 | 0.00 | 0.00 | 0.05 | 0.29  |
| 3596 | IL13    | 0.00 | 0.00 | 0.00 | NaN   |
| 3600 | IL15    | 0.00 | 0.00 | 0.00 | NaN   |
| 3601 | IL15RA  | 0.00 | 0.00 | 0.00 | NaN   |
| 3603 | IL16    | 0.02 | 0.00 | 0.00 | -0.02 |
| 3604 | TNFRSF9 | 0.00 | 0.00 | 0.00 | NaN   |
| 3606 | IL18    | 0.02 | 0.00 | 0.00 | -0.08 |
| 3608 | ILF2    | 0.02 | 0.00 | 0.10 | 0.10  |
| 3609 | ILF3    | 0.02 | 0.00 | 0.15 | 0.06  |
| 3611 | ILK     | 0.00 | 0.00 | 0.00 | NaN   |
| 3612 | IMPA1   | 0.06 | 0.00 | 0.15 | -0.02 |
| 3613 | IMPA2   | 0.04 | 0.00 | 0.10 | 0.22  |
| 3614 | IMPDH1  | 0.02 | 0.00 | 0.00 | -0.03 |
| 3615 | IMPDH2  | 0.00 | 0.00 | 0.05 | -0.13 |
| 3617 | IMPG1   | 0.10 | 0.00 | 0.20 | -0.04 |
| 3619 | INCENP  | 0.00 | 0.00 | 0.05 | -0.06 |
| 3621 | ING1    | 0.00 | 0.00 | 0.05 | 0.18  |
| 3623 | INHA    | 0.04 | 0.00 | 0.00 | -0.04 |
| 3624 | INHBA   | 0.00 | 0.00 | 0.00 | NaN   |
| 3625 | INHBB   | 0.00 | 0.00 | 0.10 | 0.23  |
| 3628 | INPP1   | 0.00 | 0.00 | 0.05 | -0.06 |
| 3630 | INS     | 0.02 | 0.00 | 0.05 | 0.52  |
| 3631 | INPP4A  | 0.02 | 0.00 | 0.10 | 0.34  |
| 3632 | INPP5A  | 0.00 | 0.00 | 0.00 | NaN   |
| 3633 | INPP5B  | 0.04 | 0.00 | 0.05 | -0.04 |
| 3635 | INPP5D  | 0.00 | 0.00 | 0.05 | 0.02  |
| 3636 | INPPL1  | 0.06 | 0.00 | 0.15 | 0.03  |
| 3638 | INSIG1  | 0.00 | 0.14 | 0.00 | 0.10  |

|      |        |      |      |      |       |
|------|--------|------|------|------|-------|
| 3640 | INSL3  | 0.04 | 0.00 | 0.00 | 0.04  |
| 3641 | INSL4  | 0.02 | 0.00 | 0.00 | -0.13 |
| 3642 | INSM1  | 0.02 | 0.00 | 0.00 | -0.03 |
| 3643 | INSR   | 0.02 | 0.00 | 0.15 | 0.13  |
| 3645 | INSRR  | 0.04 | 0.14 | 0.05 | 0.18  |
| 3652 | IPP    | 0.02 | 0.00 | 0.05 | 0.21  |
| 3653 | IPW    | 0.02 | 0.00 | 0.05 | -0.11 |
| 3655 | ITGA6  | 0.00 | 0.00 | 0.00 | NaN   |
| 3658 | IREB2  | 0.00 | 0.00 | 0.05 | -0.19 |
| 3659 | IRF1   | 0.02 | 0.00 | 0.00 | 0.08  |
| 3660 | IRF2   | 0.00 | 0.00 | 0.00 | NaN   |
| 3661 | IRF3   | 0.02 | 0.00 | 0.05 | 0.04  |
| 3663 | IRF5   | 0.00 | 0.00 | 0.05 | -0.06 |
| 3665 | IRF7   | 0.02 | 0.00 | 0.05 | -0.01 |
| 3667 | IRS1   | 0.02 | 0.00 | 0.15 | -0.16 |
| 3669 | ISG20  | 0.00 | 0.00 | 0.00 | NaN   |
| 3670 | ISL1   | 0.18 | 0.00 | 0.30 | -0.09 |
| 3671 | ISLR   | 0.00 | 0.00 | 0.00 | NaN   |
| 3673 | ITGA2  | 0.18 | 0.00 | 0.30 | -0.29 |
| 3674 | ITGA2B | 0.00 | 0.00 | 0.00 | NaN   |
| 3675 | ITGA3  | 0.06 | 0.00 | 0.00 | 0.05  |
| 3676 | ITGA4  | 0.00 | 0.00 | 0.00 | NaN   |
| 3678 | ITGA5  | 0.02 | 0.00 | 0.05 | 0.10  |
| 3679 | ITGA7  | 0.02 | 0.00 | 0.05 | 0.09  |
| 3680 | ITGA9  | 0.02 | 0.14 | 0.10 | -0.01 |
| 3682 | ITGAE  | 0.04 | 0.00 | 0.10 | 0.08  |
| 3684 | ITGAM  | 0.02 | 0.00 | 0.00 | -0.02 |
| 3685 | ITGAV  | 0.00 | 0.00 | 0.05 | 0.02  |
| 3687 | ITGAX  | 0.02 | 0.00 | 0.00 | -0.08 |
| 3688 | ITGB1  | 0.02 | 0.14 | 0.00 | 0.35  |
| 3689 | ITGB2  | 0.00 | 0.00 | 0.05 | -0.03 |
| 3690 | ITGB3  | 0.00 | 0.00 | 0.00 | NaN   |
| 3691 | ITGB4  | 0.02 | 0.14 | 0.00 | 0.24  |
| 3693 | ITGB5  | 0.00 | 0.00 | 0.10 | -0.06 |
| 3694 | ITGB6  | 0.00 | 0.00 | 0.05 | -0.09 |
| 3695 | ITGB7  | 0.00 | 0.00 | 0.00 | NaN   |
| 3696 | ITGB8  | 0.00 | 0.00 | 0.00 | NaN   |
| 3698 | ITIH2  | 0.00 | 0.00 | 0.00 | NaN   |
| 3699 | ITIH3  | 0.00 | 0.00 | 0.10 | 0.12  |
| 3700 | ITIH4  | 0.00 | 0.00 | 0.10 | 0.03  |
| 3702 | ITK    | 0.00 | 0.00 | 0.00 | NaN   |
| 3704 | ITPA   | 0.02 | 0.00 | 0.00 | -0.12 |
| 3705 | ITPK1  | 0.02 | 0.00 | 0.00 | 0.29  |
| 3706 | ITPKA  | 0.00 | 0.00 | 0.00 | NaN   |
| 3707 | ITPKB  | 0.00 | 0.00 | 0.05 | 0.18  |
| 3708 | ITPR1  | 0.00 | 0.00 | 0.05 | -0.08 |
| 3709 | ITPR2  | 0.00 | 0.00 | 0.00 | NaN   |

|      |        |      |      |      |       |
|------|--------|------|------|------|-------|
| 3710 | ITPR3  | 0.02 | 0.00 | 0.05 | 0.18  |
| 3712 | IVD    | 0.00 | 0.00 | 0.00 | NaN   |
| 3713 | IVL    | 0.02 | 0.00 | 0.10 | 0.00  |
| 3714 | JAG2   | 0.02 | 0.00 | 0.10 | 0.18  |
| 3716 | JAK1   | 0.02 | 0.00 | 0.15 | -0.19 |
| 3717 | JAK2   | 0.00 | 0.00 | 0.00 | NaN   |
| 3718 | JAK3   | 0.04 | 0.00 | 0.00 | 0.06  |
| 3725 | JUN    | 0.06 | 0.00 | 0.00 | 0.32  |
| 3726 | JUNB   | 0.00 | 0.14 | 0.05 | 0.00  |
| 3727 | JUND   | 0.02 | 0.00 | 0.00 | 0.06  |
| 3728 | JUP    | 0.02 | 0.86 | 0.05 | 0.24  |
| 3735 | KARS   | 0.00 | 0.00 | 0.00 | NaN   |
| 3736 | KCNA1  | 0.02 | 0.00 | 0.00 | -0.08 |
| 3737 | KCNA2  | 0.06 | 0.14 | 0.00 | 0.01  |
| 3738 | KCNA3  | 0.06 | 0.14 | 0.00 | -0.01 |
| 3739 | KCNA4  | 0.04 | 0.00 | 0.00 | -0.05 |
| 3741 | KCNA5  | 0.02 | 0.00 | 0.00 | 0.08  |
| 3742 | KCNA6  | 0.02 | 0.00 | 0.00 | 0.01  |
| 3744 | KCNA10 | 0.06 | 0.14 | 0.00 | -0.02 |
| 3745 | KCNB1  | 0.06 | 0.00 | 0.00 | 0.17  |
| 3746 | KCNC1  | 0.00 | 0.00 | 0.00 | NaN   |
| 3748 | KCNC3  | 0.00 | 0.00 | 0.00 | NaN   |
| 3749 | KCNC4  | 0.00 | 0.00 | 0.00 | NaN   |
| 3751 | KCND2  | 0.00 | 0.00 | 0.15 | 0.01  |
| 3752 | KCND3  | 0.00 | 0.00 | 0.00 | NaN   |
| 3753 | KCNE1  | 0.02 | 0.00 | 0.05 | -0.03 |
| 3754 | KCNF1  | 0.00 | 0.00 | 0.00 | NaN   |
| 3755 | KCG1   | 0.10 | 0.00 | 0.00 | 0.03  |
| 3756 | KCNH1  | 0.02 | 0.00 | 0.00 | 0.03  |
| 3757 | KCNH2  | 0.02 | 0.00 | 0.00 | -0.05 |
| 3758 | KCNJ1  | 0.02 | 0.00 | 0.00 | 0.08  |
| 3759 | KCNJ2  | 0.10 | 0.00 | 0.15 | -0.12 |
| 3760 | KCNJ3  | 0.00 | 0.00 | 0.00 | NaN   |
| 3761 | KCNJ4  | 0.00 | 0.14 | 0.00 | 0.09  |
| 3762 | KCNJ5  | 0.02 | 0.00 | 0.00 | -0.01 |
| 3763 | KCNJ6  | 0.00 | 0.00 | 0.00 | NaN   |
| 3764 | KCNJ8  | 0.02 | 0.00 | 0.05 | 0.13  |
| 3765 | KCNJ9  | 0.00 | 0.00 | 0.00 | NaN   |
| 3766 | KCNJ10 | 0.00 | 0.00 | 0.00 | NaN   |
| 3768 | KCNJ12 | 0.10 | 0.00 | 0.05 | -0.03 |
| 3769 | KCNJ13 | 0.00 | 0.00 | 0.05 | -0.01 |
| 3770 | KCNJ14 | 0.02 | 0.00 | 0.00 | -0.11 |
| 3772 | KCNJ15 | 0.00 | 0.00 | 0.00 | NaN   |
| 3773 | KCNJ16 | 0.10 | 0.00 | 0.15 | -0.09 |
| 3775 | KCNK1  | 0.00 | 0.00 | 0.00 | NaN   |
| 3776 | KCNK2  | 0.00 | 0.00 | 0.00 | NaN   |
| 3777 | KCNK3  | 0.00 | 0.00 | 0.00 | NaN   |

|      |         |      |      |      |       |
|------|---------|------|------|------|-------|
| 3778 | KCNMA1  | 0.00 | 0.00 | 0.05 | -0.07 |
| 3779 | KCNMB1  | 0.02 | 0.00 | 0.00 | -0.10 |
| 3780 | KCNN1   | 0.04 | 0.00 | 0.00 | 0.03  |
| 3781 | KCNN2   | 0.02 | 0.00 | 0.00 | -0.03 |
| 3782 | KCNN3   | 0.04 | 0.00 | 0.15 | -0.05 |
| 3783 | KCNN4   | 0.00 | 0.00 | 0.00 | NaN   |
| 3784 | KCNQ1   | 0.00 | 0.00 | 0.00 | NaN   |
| 3785 | KCNQ2   | 0.08 | 0.00 | 0.05 | 0.06  |
| 3786 | KCNQ3   | 0.06 | 0.00 | 0.00 | -0.07 |
| 3787 | KCNS1   | 0.04 | 0.00 | 0.00 | 0.19  |
| 3790 | KCNS3   | 0.00 | 0.00 | 0.05 | 0.05  |
| 3791 | KDR     | 0.00 | 0.00 | 0.10 | -0.23 |
| 3792 | KEL     | 0.00 | 0.14 | 0.05 | -0.04 |
| 3795 | KHK     | 0.00 | 0.00 | 0.00 | NaN   |
| 3797 | KIF3C   | 0.00 | 0.00 | 0.00 | NaN   |
| 3798 | KIF5A   | 0.02 | 0.14 | 0.00 | 0.08  |
| 3799 | KIF5B   | 0.02 | 0.14 | 0.00 | 0.26  |
| 3800 | KIF5C   | 0.00 | 0.00 | 0.00 | NaN   |
| 3801 | KIFC3   | 0.02 | 0.00 | 0.00 | -0.03 |
| 3802 | KIR2DL1 | 0.02 | 0.00 | 0.05 | -0.04 |
| 3805 | KIR2DL4 | 0.02 | 0.00 | 0.05 | 0.01  |
| 3809 | KIR2DS4 | 0.02 | 0.00 | 0.05 | 0.15  |
| 3811 | KIR3DL1 | 0.02 | 0.00 | 0.05 | -0.08 |
| 3812 | KIR3DL2 | 0.02 | 0.00 | 0.05 | 0.00  |
| 3814 | KISS1   | 0.00 | 0.00 | 0.15 | -0.06 |
| 3815 | KIT     | 0.00 | 0.00 | 0.10 | 0.24  |
| 3817 | KLK2    | 0.00 | 0.00 | 0.00 | NaN   |
| 3818 | KLKB1   | 0.00 | 0.00 | 0.00 | NaN   |
| 3820 | KLRB1   | 0.02 | 0.00 | 0.15 | 0.05  |
| 3822 | KLRC2   | 0.02 | 0.00 | 0.15 | -0.01 |
| 3823 | KLRC3   | 0.02 | 0.00 | 0.15 | 0.06  |
| 3824 | KLRD1   | 0.02 | 0.00 | 0.15 | 0.10  |
| 3836 | KPNA1   | 0.00 | 0.00 | 0.10 | 0.17  |
| 3837 | KPNB1   | 0.00 | 0.00 | 0.00 | NaN   |
| 3838 | KPNA2   | 0.12 | 0.00 | 0.20 | 0.18  |
| 3839 | KPNA3   | 0.04 | 0.00 | 0.00 | -0.18 |
| 3840 | KPNA4   | 0.00 | 0.00 | 0.00 | NaN   |
| 3841 | KPNA5   | 0.06 | 0.00 | 0.05 | 0.37  |
| 3848 | KRT1    | 0.00 | 0.00 | 0.00 | NaN   |
| 3851 | KRT4    | 0.00 | 0.00 | 0.00 | NaN   |
| 3852 | KRT5    | 0.00 | 0.00 | 0.00 | NaN   |
| 3853 | KRT6A   | 0.00 | 0.00 | 0.00 | NaN   |
| 3854 | KRT6B   | 0.00 | 0.00 | 0.00 | NaN   |
| 3855 | KRT7    | 0.00 | 0.00 | 0.00 | NaN   |
| 3856 | KRT8    | 0.00 | 0.00 | 0.00 | NaN   |
| 3857 | KRT9    | 0.02 | 0.86 | 0.05 | 0.39  |
| 3858 | KRT10   | 0.02 | 0.86 | 0.05 | -0.06 |

|      |          |      |      |      |       |
|------|----------|------|------|------|-------|
| 3859 | KRT12    | 0.02 | 0.86 | 0.05 | 0.26  |
| 3860 | KRT13    | 0.02 | 0.86 | 0.05 | 0.00  |
| 3861 | KRT14    | 0.02 | 0.86 | 0.05 | 0.11  |
| 3866 | KRT15    | 0.02 | 0.86 | 0.05 | 0.17  |
| 3868 | KRT16    | 0.02 | 0.86 | 0.05 | 0.15  |
| 3872 | KRT17    | 0.02 | 0.86 | 0.05 | 0.25  |
| 3875 | KRT18    | 0.00 | 0.00 | 0.00 | NaN   |
| 3880 | KRT19    | 0.02 | 0.86 | 0.05 | -0.08 |
| 3895 | KTN1     | 0.04 | 0.00 | 0.10 | 0.11  |
| 3898 | LAD1     | 0.00 | 0.00 | 0.05 | 0.17  |
| 3902 | LAG3     | 0.02 | 0.00 | 0.15 | -0.01 |
| 3903 | LAIR1    | 0.02 | 0.00 | 0.05 | 0.08  |
| 3904 | LAIR2    | 0.02 | 0.00 | 0.05 | -0.11 |
| 3906 | LALBA    | 0.04 | 0.00 | 0.05 | -0.06 |
| 3908 | LAMA2    | 0.02 | 0.00 | 0.10 | -0.05 |
| 3909 | LAMA3    | 0.00 | 0.00 | 0.00 | NaN   |
| 3910 | LAMA4    | 0.02 | 0.00 | 0.05 | -0.02 |
| 3911 | LAMA5    | 0.08 | 0.00 | 0.05 | 0.03  |
| 3912 | LAMB1    | 0.00 | 0.00 | 0.00 | NaN   |
| 3913 | LAMB2    | 0.00 | 0.00 | 0.05 | -0.07 |
| 3914 | LAMB3    | 0.02 | 0.00 | 0.00 | 0.02  |
| 3915 | LAMC1    | 0.02 | 0.00 | 0.00 | 0.00  |
| 3916 | LAMP1    | 0.06 | 0.00 | 0.00 | -0.01 |
| 3918 | LAMC2    | 0.02 | 0.00 | 0.00 | -0.04 |
| 3925 | STMN1    | 0.02 | 0.00 | 0.05 | 0.02  |
| 3927 | LASP1    | 0.02 | 0.86 | 0.05 | 0.06  |
| 3929 | LBP      | 0.02 | 0.00 | 0.00 | -0.04 |
| 3930 | LBR      | 0.00 | 0.00 | 0.05 | 0.12  |
| 3931 | LCAT     | 0.02 | 0.00 | 0.00 | 0.18  |
| 3932 | LCK      | 0.00 | 0.14 | 0.05 | 0.17  |
| 3934 | LCN2     | 0.00 | 0.00 | 0.00 | NaN   |
| 3937 | LCP2     | 0.02 | 0.00 | 0.00 | 0.09  |
| 3938 | LCT      | 0.00 | 0.00 | 0.00 | NaN   |
| 3939 | LDHA     | 0.00 | 0.00 | 0.05 | -0.08 |
| 3945 | LDHB     | 0.02 | 0.00 | 0.05 | -0.10 |
| 3948 | LDHC     | 0.00 | 0.00 | 0.05 | -0.03 |
| 3949 | LDLR     | 0.02 | 0.00 | 0.00 | 0.07  |
| 3950 | LECT2    | 0.02 | 0.00 | 0.00 | -0.08 |
| 3952 | LEP      | 0.02 | 0.00 | 0.00 | 0.08  |
| 3953 | LEPR     | 0.02 | 0.00 | 0.15 | 0.01  |
| 3954 | LETM1    | 0.02 | 0.00 | 0.00 | -0.03 |
| 3955 | LFNG     | 0.00 | 0.00 | 0.00 | NaN   |
| 3956 | LGALS1   | 0.00 | 0.14 | 0.00 | -0.04 |
| 3957 | LGALS2   | 0.00 | 0.14 | 0.00 | 0.17  |
| 3958 | LGALS3   | 0.00 | 0.00 | 0.10 | 0.16  |
| 3959 | LGALS3BP | 0.02 | 0.14 | 0.00 | 0.19  |
| 3960 | LGALS4   | 0.06 | 0.00 | 0.05 | 0.15  |

|      |        |      |      |      |       |
|------|--------|------|------|------|-------|
| 3963 | LGALS7 | 0.06 | 0.00 | 0.05 | -0.06 |
| 3964 | LGALS8 | 0.00 | 0.00 | 0.00 | NaN   |
| 3965 | LGALS9 | 0.10 | 0.00 | 0.05 | -0.08 |
| 3972 | LHB    | 0.06 | 0.00 | 0.05 | 0.22  |
| 3973 | LHCGR  | 0.02 | 0.00 | 0.05 | 0.03  |
| 3975 | LHX1   | 0.06 | 0.00 | 0.00 | 0.09  |
| 3976 | LIF    | 0.00 | 0.29 | 0.05 | 0.46  |
| 3977 | LIFR   | 0.02 | 0.00 | 0.00 | 0.06  |
| 3978 | LIG1   | 0.02 | 0.00 | 0.00 | 0.00  |
| 3980 | LIG3   | 0.06 | 0.00 | 0.00 | 0.28  |
| 3981 | LIG4   | 0.00 | 0.00 | 0.05 | -0.11 |
| 3982 | LIM2   | 0.02 | 0.00 | 0.05 | -0.13 |
| 3984 | LIMK1  | 0.00 | 0.00 | 0.00 | NaN   |
| 3985 | LIMK2  | 0.00 | 0.29 | 0.05 | 0.29  |
| 3987 | LIMS1  | 0.02 | 0.00 | 0.00 | -0.06 |
| 3988 | LIPA   | 0.02 | 0.00 | 0.05 | 0.03  |
| 3990 | LIPC   | 0.00 | 0.00 | 0.00 | NaN   |
| 3991 | LIPE   | 0.00 | 0.00 | 0.05 | 0.12  |
| 3992 | FADS1  | 0.00 | 0.00 | 0.05 | 0.17  |
| 3993 | LLGL2  | 0.02 | 0.14 | 0.00 | 0.38  |
| 3995 | FADS3  | 0.00 | 0.00 | 0.05 | 0.01  |
| 3996 | LLGL1  | 0.02 | 0.00 | 0.00 | -0.01 |
| 3998 | LMAN1  | 0.00 | 0.00 | 0.05 | 0.11  |
| 4000 | LMNA   | 0.04 | 0.14 | 0.05 | -0.04 |
| 4001 | LMNB1  | 0.00 | 0.00 | 0.00 | NaN   |
| 4004 | LMO1   | 0.00 | 0.00 | 0.00 | NaN   |
| 4005 | LMO2   | 0.02 | 0.00 | 0.00 | -0.18 |
| 4008 | LMO7   | 0.00 | 0.00 | 0.00 | NaN   |
| 4010 | LMX1B  | 0.02 | 0.00 | 0.00 | -0.01 |
| 4012 | LNPEP  | 0.02 | 0.00 | 0.00 | -0.07 |
| 4014 | LOR    | 0.02 | 0.00 | 0.10 | 0.08  |
| 4015 | LOX    | 0.00 | 0.00 | 0.00 | NaN   |
| 4016 | LOXL1  | 0.00 | 0.00 | 0.05 | 0.00  |
| 4017 | LOXL2  | 0.02 | 0.00 | 0.00 | 0.56  |
| 4018 | LPA    | 0.02 | 0.00 | 0.05 | -0.01 |
| 4023 | LPL    | 0.00 | 0.00 | 0.00 | NaN   |
| 4025 | LPO    | 0.04 | 0.00 | 0.05 | 0.02  |
| 4026 | LPP    | 0.00 | 0.14 | 0.00 | 0.04  |
| 4033 | LRMP   | 0.06 | 0.00 | 0.00 | -0.07 |
| 4034 | LRRN1  | 0.00 | 0.00 | 0.05 | 0.41  |
| 4035 | LRP1   | 0.00 | 0.00 | 0.00 | NaN   |
| 4036 | LRP2   | 0.00 | 0.00 | 0.00 | NaN   |
| 4037 | LRP3   | 0.00 | 0.00 | 0.00 | NaN   |
| 4038 | LRP4   | 0.02 | 0.00 | 0.00 | 0.00  |
| 4040 | LRP6   | 0.04 | 0.00 | 0.05 | -0.06 |
| 4041 | LRP5   | 0.02 | 0.00 | 0.05 | 0.17  |
| 4043 | LRPAP1 | 0.00 | 0.00 | 0.00 | NaN   |

|      |         |      |      |      |       |
|------|---------|------|------|------|-------|
| 4045 | LSAMP   | 0.02 | 0.00 | 0.00 | -0.03 |
| 4046 | LSP1    | 0.02 | 0.00 | 0.05 | -0.03 |
| 4047 | LSS     | 0.00 | 0.00 | 0.05 | -0.02 |
| 4048 | LTA4H   | 0.02 | 0.00 | 0.00 | -0.01 |
| 4049 | LTA     | 0.04 | 0.14 | 0.05 | 0.09  |
| 4050 | LTB     | 0.02 | 0.00 | 0.05 | 0.00  |
| 4051 | CYP4F3  | 0.04 | 0.00 | 0.00 | -0.02 |
| 4052 | LTBP1   | 0.00 | 0.00 | 0.00 | NaN   |
| 4053 | LTBP2   | 0.02 | 0.00 | 0.05 | 0.18  |
| 4054 | LTBP3   | 0.04 | 0.00 | 0.05 | -0.23 |
| 4055 | LTBR    | 0.02 | 0.00 | 0.15 | 0.18  |
| 4056 | LTC4S   | 0.08 | 0.43 | 0.10 | 0.29  |
| 4057 | LTF     | 0.02 | 0.14 | 0.15 | -0.06 |
| 4058 | LTK     | 0.00 | 0.00 | 0.00 | NaN   |
| 4060 | LUM     | 0.00 | 0.00 | 0.00 | NaN   |
| 4061 | LY6E    | 0.10 | 0.00 | 0.15 | 0.10  |
| 4062 | LY6H    | 0.10 | 0.00 | 0.15 | 0.01  |
| 4063 | LY9     | 0.00 | 0.00 | 0.00 | NaN   |
| 4065 | LY75    | 0.00 | 0.00 | 0.05 | 0.08  |
| 4066 | LYL1    | 0.00 | 0.14 | 0.05 | -0.02 |
| 4067 | LYN     | 0.04 | 0.00 | 0.00 | -0.05 |
| 4070 | TACSTD2 | 0.06 | 0.00 | 0.00 | 0.28  |
| 4071 | TM4SF1  | 0.00 | 0.00 | 0.00 | NaN   |
| 4074 | M6PR    | 0.02 | 0.00 | 0.15 | 0.11  |
| 4081 | MAB21L1 | 0.02 | 0.00 | 0.00 | -0.03 |
| 4082 | MARCKS  | 0.04 | 0.00 | 0.00 | 0.04  |
| 4085 | MAD2L1  | 0.02 | 0.00 | 0.00 | 0.13  |
| 4094 | MAF     | 0.00 | 0.00 | 0.00 | NaN   |
| 4097 | MAFG    | 0.00 | 0.00 | 0.00 | NaN   |
| 4099 | MAG     | 0.00 | 0.00 | 0.00 | NaN   |
| 4117 | MAK     | 0.04 | 0.00 | 0.00 | -0.08 |
| 4118 | MAL     | 0.04 | 0.00 | 0.05 | -0.11 |
| 4121 | MAN1A1  | 0.04 | 0.00 | 0.00 | 0.25  |
| 4122 | MAN2A2  | 0.02 | 0.00 | 0.10 | 0.03  |
| 4123 | MAN2C1  | 0.00 | 0.00 | 0.05 | -0.09 |
| 4124 | MAN2A1  | 0.02 | 0.00 | 0.00 | 0.10  |
| 4125 | MAN2B1  | 0.06 | 0.14 | 0.00 | -0.05 |
| 4126 | MANBA   | 0.08 | 0.00 | 0.00 | 0.12  |
| 4130 | MAP1A   | 0.04 | 0.00 | 0.00 | 0.18  |
| 4131 | MAP1B   | 0.06 | 0.00 | 0.00 | 0.12  |
| 4133 | MAP2    | 0.02 | 0.00 | 0.05 | 0.06  |
| 4134 | MAP4    | 0.02 | 0.14 | 0.15 | 0.24  |
| 4137 | MAPT    | 0.00 | 0.00 | 0.00 | NaN   |
| 4139 | MARK1   | 0.02 | 0.00 | 0.00 | -0.09 |
| 4140 | MARK3   | 0.00 | 0.00 | 0.05 | -0.11 |
| 4141 | MARS    | 0.02 | 0.14 | 0.00 | 0.01  |
| 4142 | MAS1    | 0.02 | 0.00 | 0.05 | -0.09 |



|      |        |      |      |      |       |
|------|--------|------|------|------|-------|
| 4143 | MAT1A  | 0.06 | 0.14 | 0.05 | 0.02  |
| 4144 | MAT2A  | 0.00 | 0.00 | 0.00 | NaN   |
| 4145 | MATK   | 0.02 | 0.00 | 0.15 | 0.00  |
| 4146 | MATN1  | 0.00 | 0.14 | 0.00 | 0.02  |
| 4147 | MATN2  | 0.06 | 0.00 | 0.00 | -0.11 |
| 4148 | MATN3  | 0.00 | 0.00 | 0.00 | NaN   |
| 4149 | MAX    | 0.06 | 0.00 | 0.00 | 0.22  |
| 4150 | MAZ    | 0.06 | 0.14 | 0.00 | 0.15  |
| 4151 | MB     | 0.00 | 0.29 | 0.05 | -0.17 |
| 4152 | MBD1   | 0.00 | 0.00 | 0.05 | 0.13  |
| 4153 | MBL2   | 0.02 | 0.14 | 0.10 | -0.25 |
| 4155 | MBP    | 0.00 | 0.00 | 0.05 | 0.09  |
| 4157 | MC1R   | 0.00 | 0.00 | 0.10 | 0.07  |
| 4158 | MC2R   | 0.08 | 0.14 | 0.10 | 0.02  |
| 4159 | MC3R   | 0.12 | 0.00 | 0.10 | -0.08 |
| 4160 | MC4R   | 0.00 | 0.00 | 0.05 | -0.08 |
| 4161 | MC5R   | 0.08 | 0.14 | 0.10 | 0.04  |
| 4162 | MCAM   | 0.00 | 0.00 | 0.05 | 0.17  |
| 4163 | MCC    | 0.00 | 0.00 | 0.00 | NaN   |
| 4166 | CHST6  | 0.00 | 0.00 | 0.00 | NaN   |
| 4170 | MCL1   | 0.02 | 0.00 | 0.10 | 0.20  |
| 4171 | MCM2   | 0.04 | 0.00 | 0.00 | 0.08  |
| 4172 | MCM3   | 0.02 | 0.00 | 0.00 | -0.13 |
| 4173 | MCM4   | 0.04 | 0.00 | 0.00 | -0.10 |
| 4174 | MCM5   | 0.00 | 0.29 | 0.05 | 0.11  |
| 4175 | MCM6   | 0.00 | 0.00 | 0.00 | NaN   |
| 4176 | MCM7   | 0.02 | 0.00 | 0.00 | 0.13  |
| 4185 | ADAM11 | 0.00 | 0.00 | 0.05 | 0.02  |
| 4188 | MDFI   | 0.06 | 0.00 | 0.05 | 0.10  |
| 4189 | DNAJB9 | 0.00 | 0.00 | 0.00 | NaN   |
| 4190 | MDH1   | 0.00 | 0.00 | 0.00 | NaN   |
| 4191 | MDH2   | 0.00 | 0.00 | 0.00 | NaN   |
| 4192 | MDK    | 0.00 | 0.00 | 0.05 | 0.04  |
| 4193 | MDM2   | 0.08 | 0.00 | 0.00 | 0.55  |
| 4194 | MDM4   | 0.00 | 0.00 | 0.00 | NaN   |
| 4197 | MDS1   | 0.00 | 0.00 | 0.00 | NaN   |
| 4199 | ME1    | 0.10 | 0.00 | 0.20 | 0.10  |
| 4200 | ME2    | 0.00 | 0.00 | 0.05 | 0.11  |
| 4205 | MEF2A  | 0.16 | 0.00 | 0.10 | 0.01  |
| 4207 | MEF2B  | 0.12 | 0.00 | 0.15 | 0.00  |
| 4208 | MEF2C  | 0.00 | 0.00 | 0.00 | NaN   |
| 4209 | MEF2D  | 0.04 | 0.14 | 0.05 | -0.02 |
| 4210 | MEFV   | 0.02 | 0.00 | 0.00 | 0.07  |
| 4211 | MEIS1  | 0.00 | 0.00 | 0.00 | NaN   |
| 4212 | MEIS2  | 0.04 | 0.00 | 0.05 | 0.09  |
| 4214 | MAP3K1 | 0.00 | 0.00 | 0.05 | -0.09 |
| 4215 | MAP3K3 | 0.12 | 0.00 | 0.20 | 0.31  |

|      |         |      |      |      |       |
|------|---------|------|------|------|-------|
| 4216 | MAP3K4  | 0.02 | 0.00 | 0.05 | 0.09  |
| 4217 | MAP3K5  | 0.00 | 0.00 | 0.10 | 0.07  |
| 4221 | MEN1    | 0.00 | 0.00 | 0.00 | NaN   |
| 4222 | MEOX1   | 0.00 | 0.14 | 0.05 | -0.11 |
| 4223 | MEOX2   | 0.00 | 0.00 | 0.00 | NaN   |
| 4224 | MEP1A   | 0.04 | 0.14 | 0.20 | -0.02 |
| 4225 | MEP1B   | 0.02 | 0.00 | 0.10 | -0.09 |
| 4232 | MEST    | 0.00 | 0.00 | 0.00 | NaN   |
| 4233 | MET     | 0.00 | 0.00 | 0.00 | NaN   |
| 4234 | METTLL1 | 0.02 | 0.00 | 0.00 | -0.02 |
| 4236 | MFAP1   | 0.04 | 0.00 | 0.00 | 0.07  |
| 4237 | MFAP2   | 0.02 | 0.00 | 0.00 | 0.05  |
| 4238 | MFAP3   | 0.02 | 0.00 | 0.00 | 0.17  |
| 4239 | MFAP4   | 0.02 | 0.00 | 0.00 | -0.02 |
| 4240 | MFGE8   | 0.00 | 0.00 | 0.00 | NaN   |
| 4241 | MFI2    | 0.02 | 0.00 | 0.00 | -0.04 |
| 4242 | MFNG    | 0.00 | 0.14 | 0.00 | 0.05  |
| 4246 | SCGB2A1 | 0.00 | 0.00 | 0.05 | -0.12 |
| 4247 | MGAT2   | 0.00 | 0.00 | 0.00 | NaN   |
| 4248 | MGAT3   | 0.00 | 0.14 | 0.00 | 0.11  |
| 4249 | MGAT5   | 0.00 | 0.00 | 0.00 | NaN   |
| 4250 | SCGB2A2 | 0.00 | 0.00 | 0.05 | -0.18 |
| 4254 | KITLG   | 0.02 | 0.14 | 0.00 | 0.03  |
| 4255 | MGMT    | 0.04 | 0.00 | 0.00 | 0.11  |
| 4256 | MGP     | 0.00 | 0.00 | 0.00 | NaN   |
| 4258 | MGST2   | 0.00 | 0.00 | 0.05 | -0.10 |
| 4259 | MGST3   | 0.02 | 0.00 | 0.00 | -0.16 |
| 4276 | MICA    | 0.04 | 0.14 | 0.05 | 0.13  |
| 4277 | MICB    | 0.04 | 0.14 | 0.05 | 0.22  |
| 4282 | MIF     | 0.00 | 0.14 | 0.05 | 0.04  |
| 4284 | MIP     | 0.00 | 0.00 | 0.00 | NaN   |
| 4285 | MIPEP   | 0.02 | 0.00 | 0.00 | 0.14  |
| 4286 | MITF    | 0.02 | 0.00 | 0.00 | -0.02 |
| 4288 | MKI67   | 0.04 | 0.00 | 0.00 | 0.09  |
| 4289 | MKLN1   | 0.00 | 0.00 | 0.00 | NaN   |
| 4291 | MLF1    | 0.02 | 0.00 | 0.10 | 0.11  |
| 4292 | MLH1    | 0.02 | 0.14 | 0.10 | -0.03 |
| 4293 | MAP3K9  | 0.02 | 0.00 | 0.05 | -0.11 |
| 4294 | MAP3K10 | 0.06 | 0.00 | 0.05 | -0.02 |
| 4295 | MLN     | 0.00 | 0.00 | 0.00 | NaN   |
| 4296 | MAP3K11 | 0.04 | 0.00 | 0.05 | 0.12  |
| 4297 | MLL     | 0.00 | 0.00 | 0.00 | NaN   |
| 4298 | MLLT1   | 0.02 | 0.00 | 0.15 | -0.11 |
| 4300 | MLLT3   | 0.02 | 0.00 | 0.05 | -0.07 |
| 4301 | MLLT4   | 0.02 | 0.00 | 0.05 | -0.01 |
| 4306 | NR3C2   | 0.02 | 0.14 | 0.10 | 0.11  |
| 4308 | TRPM1   | 0.00 | 0.00 | 0.00 | NaN   |

|      |         |      |      |      |       |
|------|---------|------|------|------|-------|
| 4311 | MME     | 0.02 | 0.00 | 0.10 | -0.03 |
| 4312 | MMP1    | 0.00 | 0.00 | 0.00 | NaN   |
| 4313 | MMP2    | 0.02 | 0.00 | 0.00 | 0.09  |
| 4314 | MMP3    | 0.02 | 0.00 | 0.10 | -0.02 |
| 4316 | MMP7    | 0.00 | 0.00 | 0.00 | NaN   |
| 4317 | MMP8    | 0.00 | 0.00 | 0.00 | NaN   |
| 4318 | MMP9    | 0.02 | 0.00 | 0.00 | 0.01  |
| 4319 | MMP10   | 0.00 | 0.00 | 0.00 | NaN   |
| 4320 | MMP11   | 0.00 | 0.14 | 0.05 | 0.26  |
| 4321 | MMP12   | 0.02 | 0.00 | 0.10 | 0.28  |
| 4322 | MMP13   | 0.02 | 0.00 | 0.10 | -0.05 |
| 4323 | MMP14   | 0.02 | 0.00 | 0.00 | 0.10  |
| 4324 | MMP15   | 0.04 | 0.00 | 0.05 | 0.22  |
| 4325 | MMP16   | 0.06 | 0.00 | 0.15 | 0.19  |
| 4326 | MMP17   | 0.08 | 0.14 | 0.05 | -0.01 |
| 4327 | MMP19   | 0.02 | 0.00 | 0.05 | 0.15  |
| 4329 | ALDH6A1 | 0.02 | 0.00 | 0.05 | 0.05  |
| 4330 | MN1     | 0.00 | 0.14 | 0.05 | -0.15 |
| 4331 | MNAT1   | 0.00 | 0.14 | 0.00 | 0.01  |
| 4332 | MNDA    | 0.00 | 0.00 | 0.00 | NaN   |
| 4335 | MNT     | 0.04 | 0.00 | 0.05 | 0.12  |
| 4336 | MOBP    | 0.02 | 0.00 | 0.05 | 0.10  |
| 4338 | MOCS2   | 0.18 | 0.00 | 0.30 | -0.20 |
| 4340 | MOG     | 0.04 | 0.14 | 0.05 | -0.05 |
| 4342 | MOS     | 0.04 | 0.00 | 0.00 | -0.03 |
| 4350 | MPG     | 0.18 | 0.00 | 0.10 | 0.01  |
| 4351 | MPI     | 0.00 | 0.00 | 0.05 | -0.08 |
| 4352 | MPL     | 0.02 | 0.00 | 0.05 | -0.02 |
| 4353 | MPO     | 0.04 | 0.00 | 0.05 | 0.13  |
| 4355 | MPP2    | 0.00 | 0.14 | 0.05 | 0.08  |
| 4356 | MPP3    | 0.00 | 0.14 | 0.05 | 0.06  |
| 4357 | MPST    | 0.00 | 0.14 | 0.00 | 0.03  |
| 4358 | MPV17   | 0.00 | 0.00 | 0.00 | NaN   |
| 4359 | MPZ     | 0.00 | 0.00 | 0.00 | NaN   |
| 4361 | MRE11A  | 0.00 | 0.00 | 0.00 | NaN   |
| 4363 | ABCC1   | 0.02 | 0.00 | 0.05 | 0.26  |
| 4430 | MYO1B   | 0.00 | 0.00 | 0.05 | 0.00  |
| 4436 | MSH2    | 0.00 | 0.00 | 0.00 | NaN   |
| 4437 | MSH3    | 0.00 | 0.00 | 0.00 | NaN   |
| 4438 | MSH4    | 0.02 | 0.00 | 0.05 | -0.08 |
| 4439 | MSH5    | 0.02 | 0.00 | 0.05 | 0.02  |
| 4440 | MSI1    | 0.02 | 0.00 | 0.10 | -0.15 |
| 4477 | MSMB    | 0.02 | 0.00 | 0.05 | 0.06  |
| 4481 | MSR1    | 0.00 | 0.00 | 0.10 | 0.00  |
| 4482 | MSRA    | 0.00 | 0.00 | 0.00 | NaN   |
| 4485 | MST1    | 0.06 | 0.00 | 0.05 | -0.10 |
| 4486 | MST1R   | 0.06 | 0.00 | 0.05 | 0.09  |

|      |         |      |      |      |       |
|------|---------|------|------|------|-------|
| 4487 | MSX1    | 0.00 | 0.00 | 0.00 | NaN   |
| 4488 | MSX2    | 0.00 | 0.00 | 0.00 | NaN   |
| 4495 | MT1G    | 0.00 | 0.14 | 0.00 | -0.06 |
| 4496 | MT1H    | 0.00 | 0.14 | 0.00 | -0.09 |
| 4501 | MT1X    | 0.00 | 0.14 | 0.00 | -0.04 |
| 4502 | MT2A    | 0.00 | 0.14 | 0.00 | -0.06 |
| 4504 | MT3     | 0.00 | 0.14 | 0.00 | 0.01  |
| 4507 | MTAP    | 0.02 | 0.00 | 0.05 | -0.08 |
| 4520 | MTF1    | 0.04 | 0.00 | 0.05 | 0.11  |
| 4521 | NUDT1   | 0.00 | 0.00 | 0.00 | NaN   |
| 4522 | MTHFD1  | 0.06 | 0.00 | 0.00 | 0.37  |
| 4524 | MTHFR   | 0.02 | 0.00 | 0.00 | -0.12 |
| 4528 | MTIF2   | 0.02 | 0.00 | 0.05 | 0.01  |
| 4542 | MYO1F   | 0.02 | 0.00 | 0.15 | 0.06  |
| 4543 | MTNR1A  | 0.00 | 0.00 | 0.00 | NaN   |
| 4544 | MTNR1B  | 0.00 | 0.00 | 0.00 | NaN   |
| 4548 | MTR     | 0.00 | 0.00 | 0.00 | NaN   |
| 4552 | MTRR    | 0.00 | 0.00 | 0.00 | NaN   |
| 4580 | MTX1    | 0.04 | 0.00 | 0.15 | -0.16 |
| 4582 | MUC1    | 0.04 | 0.00 | 0.15 | -0.07 |
| 4583 | MUC2    | 0.02 | 0.00 | 0.05 | -0.02 |
| 4585 | MUC4    | 0.02 | 0.00 | 0.00 | 0.05  |
| 4586 | MUC5AC  | 0.02 | 0.00 | 0.05 | 0.03  |
| 4587 | MUC5B   | 0.02 | 0.00 | 0.05 | -0.04 |
| 4588 | MUC6    | 0.02 | 0.00 | 0.05 | 0.15  |
| 4593 | MUSK    | 0.00 | 0.00 | 0.00 | NaN   |
| 4594 | MUT     | 0.00 | 0.00 | 0.00 | NaN   |
| 4595 | MUTYH   | 0.02 | 0.00 | 0.05 | 0.11  |
| 4597 | MVD     | 0.00 | 0.00 | 0.10 | 0.24  |
| 4598 | MVK     | 0.02 | 0.00 | 0.00 | 0.01  |
| 4599 | MX1     | 0.00 | 0.00 | 0.00 | NaN   |
| 4600 | MX2     | 0.00 | 0.00 | 0.05 | 0.10  |
| 4601 | MXI1    | 0.00 | 0.14 | 0.00 | -0.02 |
| 4602 | MYB     | 0.00 | 0.00 | 0.00 | NaN   |
| 4603 | MYBL1   | 0.00 | 0.00 | 0.00 | NaN   |
| 4605 | MYBL2   | 0.02 | 0.00 | 0.10 | 0.13  |
| 4606 | MYBPC2  | 0.00 | 0.00 | 0.00 | NaN   |
| 4608 | MYBPH   | 0.00 | 0.00 | 0.00 | NaN   |
| 4609 | MYC     | 0.12 | 0.00 | 0.05 | 0.28  |
| 4610 | MYCL1   | 0.02 | 0.00 | 0.05 | 0.00  |
| 4613 | MYCN    | 0.00 | 0.00 | 0.00 | NaN   |
| 4615 | MYD88   | 0.00 | 0.00 | 0.15 | 0.20  |
| 4616 | GADD45B | 0.00 | 0.00 | 0.00 | NaN   |
| 4617 | MYF5    | 0.02 | 0.00 | 0.00 | -0.02 |
| 4618 | MYF6    | 0.02 | 0.00 | 0.00 | -0.17 |
| 4619 | MYH1    | 0.04 | 0.00 | 0.00 | -0.04 |
| 4620 | MYH2    | 0.04 | 0.00 | 0.00 | 0.06  |

|      |          |      |      |      |       |
|------|----------|------|------|------|-------|
| 4621 | MYH3     | 0.04 | 0.00 | 0.00 | 0.02  |
| 4622 | MYH4     | 0.04 | 0.00 | 0.00 | -0.07 |
| 4624 | MYH6     | 0.02 | 0.14 | 0.10 | 0.11  |
| 4625 | MYH7     | 0.02 | 0.14 | 0.10 | 0.22  |
| 4626 | MYH8     | 0.04 | 0.00 | 0.00 | 0.03  |
| 4627 | MYH9     | 0.00 | 0.14 | 0.00 | -0.25 |
| 4629 | MYH11    | 0.02 | 0.00 | 0.05 | -0.03 |
| 4632 | MYL1     | 0.02 | 0.00 | 0.05 | -0.20 |
| 4633 | MYL2     | 0.02 | 0.00 | 0.00 | -0.11 |
| 4634 | MYL3     | 0.02 | 0.14 | 0.15 | 0.02  |
| 4635 | MYL4     | 0.00 | 0.00 | 0.00 | NaN   |
| 4637 | MYL6     | 0.00 | 0.00 | 0.00 | NaN   |
| 4638 | MYLK     | 0.00 | 0.00 | 0.10 | 0.28  |
| 4640 | MYO1A    | 0.00 | 0.00 | 0.00 | NaN   |
| 4641 | MYO1C    | 0.04 | 0.00 | 0.05 | -0.16 |
| 4642 | MYO1D    | 0.04 | 0.00 | 0.05 | 0.03  |
| 4643 | MYO1E    | 0.00 | 0.00 | 0.00 | NaN   |
| 4644 | MYO5A    | 0.00 | 0.00 | 0.00 | NaN   |
| 4646 | MYO6     | 0.10 | 0.00 | 0.20 | -0.02 |
| 4647 | MYO7A    | 0.02 | 0.00 | 0.05 | 0.17  |
| 4649 | MYO9A    | 0.00 | 0.00 | 0.00 | NaN   |
| 4650 | MYO9B    | 0.04 | 0.00 | 0.00 | 0.36  |
| 4651 | MYO10    | 0.02 | 0.00 | 0.00 | -0.05 |
| 4653 | MYOC     | 0.04 | 0.00 | 0.05 | -0.15 |
| 4654 | MYOD1    | 0.00 | 0.00 | 0.00 | NaN   |
| 4656 | MYOG     | 0.00 | 0.00 | 0.00 | NaN   |
| 4659 | PPP1R12A | 0.02 | 0.00 | 0.00 | 0.21  |
| 4660 | PPP1R12B | 0.02 | 0.00 | 0.00 | 0.05  |
| 4661 | MYT1     | 0.08 | 0.00 | 0.05 | 0.15  |
| 4664 | NAB1     | 0.00 | 0.00 | 0.05 | -0.06 |
| 4665 | NAB2     | 0.00 | 0.00 | 0.00 | NaN   |
| 4666 | NACA     | 0.00 | 0.00 | 0.00 | NaN   |
| 4668 | NAGA     | 0.00 | 0.14 | 0.05 | 0.04  |
| 4669 | NAGLU    | 0.02 | 0.86 | 0.05 | 0.09  |
| 4673 | NAP1L1   | 0.02 | 0.00 | 0.00 | 0.08  |
| 4676 | NAP1L4   | 0.02 | 0.00 | 0.05 | -0.07 |
| 4677 | NARS     | 0.00 | 0.00 | 0.15 | 0.15  |
| 4678 | NASP     | 0.02 | 0.00 | 0.05 | 0.17  |
| 4680 | CEACAM6  | 0.00 | 0.00 | 0.05 | -0.10 |
| 4681 | NBL1     | 0.00 | 0.00 | 0.00 | NaN   |
| 4682 | NUBP1    | 0.00 | 0.00 | 0.00 | NaN   |
| 4684 | NCAM1    | 0.00 | 0.00 | 0.00 | NaN   |
| 4685 | NCAM2    | 0.00 | 0.00 | 0.05 | -0.03 |
| 4686 | NCBP1    | 0.04 | 0.00 | 0.00 | 0.03  |
| 4687 | NCF1     | 0.00 | 0.00 | 0.00 | NaN   |
| 4688 | NCF2     | 0.02 | 0.00 | 0.00 | 0.15  |
| 4689 | NCF4     | 0.00 | 0.14 | 0.00 | 0.06  |

|      |         |      |      |      |       |
|------|---------|------|------|------|-------|
| 4690 | NCK1    | 0.02 | 0.14 | 0.00 | -0.01 |
| 4691 | NCL     | 0.02 | 0.00 | 0.15 | 0.09  |
| 4692 | NDN     | 0.14 | 0.14 | 0.25 | -0.15 |
| 4695 | NDUFA2  | 0.00 | 0.00 | 0.00 | NaN   |
| 4696 | NDUFA3  | 0.02 | 0.00 | 0.05 | -0.10 |
| 4697 | NDUFA4  | 0.00 | 0.00 | 0.00 | NaN   |
| 4698 | NDUFA5  | 0.00 | 0.00 | 0.00 | NaN   |
| 4700 | NDUFA6  | 0.00 | 0.14 | 0.05 | 0.18  |
| 4701 | NDUFA7  | 0.02 | 0.00 | 0.15 | 0.07  |
| 4702 | NDUFA8  | 0.06 | 0.00 | 0.00 | -0.13 |
| 4703 | NEB     | 0.00 | 0.00 | 0.00 | NaN   |
| 4704 | NDUFA9  | 0.02 | 0.00 | 0.00 | -0.33 |
| 4705 | NDUFA10 | 0.08 | 0.43 | 0.10 | -0.18 |
| 4706 | NDUFAB1 | 0.02 | 0.14 | 0.00 | -0.15 |
| 4707 | NDUFB1  | 0.00 | 0.00 | 0.05 | -0.06 |
| 4708 | NDUFB2  | 0.00 | 0.14 | 0.05 | 0.06  |
| 4709 | NDUFB3  | 0.00 | 0.00 | 0.05 | -0.09 |
| 4710 | NDUFB4  | 0.00 | 0.00 | 0.10 | -0.07 |
| 4711 | NDUFB5  | 0.00 | 0.00 | 0.10 | 0.26  |
| 4712 | NDUFB6  | 0.00 | 0.00 | 0.15 | 0.10  |
| 4713 | NDUFB7  | 0.00 | 0.00 | 0.05 | 0.33  |
| 4714 | NDUFB8  | 0.00 | 0.00 | 0.05 | -0.03 |
| 4717 | NDUFC1  | 0.00 | 0.00 | 0.05 | 0.01  |
| 4718 | NDUFC2  | 0.02 | 0.00 | 0.00 | 0.36  |
| 4719 | NDUFS1  | 0.00 | 0.00 | 0.00 | NaN   |
| 4720 | NDUFS2  | 0.00 | 0.00 | 0.00 | NaN   |
| 4722 | NDUFS3  | 0.04 | 0.00 | 0.00 | 0.10  |
| 4724 | NDUFS4  | 0.18 | 0.00 | 0.30 | -0.34 |
| 4725 | NDUFS5  | 0.04 | 0.00 | 0.05 | 0.01  |
| 4726 | NDUFS6  | 0.00 | 0.00 | 0.00 | NaN   |
| 4727 | NDUFS7  | 0.02 | 0.00 | 0.05 | -0.04 |
| 4728 | NDUFS8  | 0.04 | 0.00 | 0.05 | 0.23  |
| 4729 | NDUFV2  | 0.02 | 0.00 | 0.00 | 0.08  |
| 4733 | DRG1    | 0.00 | 0.29 | 0.05 | 0.19  |
| 4734 | NEDD4   | 0.00 | 0.00 | 0.00 | NaN   |
| 4736 | RPL10A  | 0.04 | 0.00 | 0.00 | 0.10  |
| 4738 | NEDD8   | 0.02 | 0.14 | 0.10 | 0.10  |
| 4744 | NEFH    | 0.00 | 0.14 | 0.00 | -0.04 |
| 4745 | NELL1   | 0.02 | 0.00 | 0.00 | -0.01 |
| 4747 | NEFL    | 0.00 | 0.14 | 0.00 | -0.02 |
| 4750 | NEK1    | 0.02 | 0.00 | 0.00 | 0.20  |
| 4751 | NEK2    | 0.02 | 0.00 | 0.15 | 0.35  |
| 4752 | NEK3    | 0.04 | 0.00 | 0.10 | -0.01 |
| 4753 | NELL2   | 0.00 | 0.00 | 0.35 | 0.00  |
| 4756 | NEO1    | 0.00 | 0.00 | 0.05 | -0.20 |
| 4758 | NEU1    | 0.02 | 0.00 | 0.05 | 0.07  |
| 4759 | NEU2    | 0.00 | 0.00 | 0.05 | -0.02 |

|      |         |      |      |      |       |
|------|---------|------|------|------|-------|
| 4760 | NEUROD1 | 0.00 | 0.00 | 0.00 | NaN   |
| 4761 | NEUROD2 | 0.02 | 0.86 | 0.05 | 0.33  |
| 4762 | NEUROG1 | 0.02 | 0.00 | 0.00 | -0.01 |
| 4763 | NF1     | 0.10 | 0.00 | 0.05 | 0.23  |
| 4771 | NF2     | 0.00 | 0.29 | 0.05 | 0.39  |
| 4772 | NFATC1  | 0.02 | 0.00 | 0.05 | 0.16  |
| 4775 | NFATC3  | 0.02 | 0.00 | 0.00 | -0.09 |
| 4776 | NFATC4  | 0.02 | 0.00 | 0.05 | -0.10 |
| 4778 | NFE2    | 0.02 | 0.00 | 0.05 | 0.00  |
| 4779 | NFE2L1  | 0.04 | 0.00 | 0.05 | -0.02 |
| 4780 | NFE2L2  | 0.02 | 0.00 | 0.00 | 0.16  |
| 4781 | NFIB    | 0.00 | 0.00 | 0.00 | NaN   |
| 4782 | NFIC    | 0.02 | 0.00 | 0.15 | -0.15 |
| 4783 | NFIL3   | 0.00 | 0.00 | 0.05 | 0.21  |
| 4784 | NFIX    | 0.00 | 0.14 | 0.05 | 0.12  |
| 4790 | NFKB1   | 0.08 | 0.00 | 0.00 | 0.02  |
| 4791 | NFKB2   | 0.02 | 0.00 | 0.00 | -0.02 |
| 4792 | NFKBIA  | 0.04 | 0.00 | 0.00 | -0.04 |
| 4793 | NFKBIB  | 0.06 | 0.00 | 0.05 | 0.09  |
| 4794 | NFKBIE  | 0.04 | 0.14 | 0.20 | 0.31  |
| 4795 | NFKBIL1 | 0.04 | 0.14 | 0.05 | 0.09  |
| 4798 | NFRKB   | 0.02 | 0.00 | 0.00 | -0.05 |
| 4799 | NFX1    | 0.04 | 0.00 | 0.00 | 0.05  |
| 4800 | NFYA    | 0.06 | 0.00 | 0.05 | 0.11  |
| 4801 | NFYB    | 0.00 | 0.00 | 0.00 | NaN   |
| 4802 | NFYC    | 0.02 | 0.00 | 0.05 | -0.04 |
| 4804 | NGFR    | 0.04 | 0.00 | 0.05 | -0.02 |
| 4808 | NHLH2   | 0.08 | 0.00 | 0.10 | 0.03  |
| 4809 | NHP2L1  | 0.00 | 0.14 | 0.00 | -0.02 |
| 4814 | NINJ1   | 0.04 | 0.00 | 0.05 | -0.03 |
| 4815 | NINJ2   | 0.08 | 0.14 | 0.10 | 0.11  |
| 4817 | NIT1    | 0.00 | 0.00 | 0.00 | NaN   |
| 4818 | NKG7    | 0.02 | 0.00 | 0.05 | 0.00  |
| 4820 | NKTR    | 0.00 | 0.00 | 0.05 | 0.22  |
| 4826 | NNAT    | 0.04 | 0.00 | 0.00 | 0.02  |
| 4828 | NMB     | 0.00 | 0.00 | 0.00 | NaN   |
| 4829 | NMBR    | 0.02 | 0.00 | 0.05 | 0.04  |
| 4830 | NME1    | 0.10 | 0.00 | 0.10 | 0.09  |
| 4831 | NME2    | 0.10 | 0.00 | 0.10 | 0.13  |
| 4832 | NME3    | 0.18 | 0.00 | 0.10 | 0.00  |
| 4833 | NME4    | 0.18 | 0.00 | 0.10 | -0.03 |
| 4836 | NMT1    | 0.00 | 0.00 | 0.05 | -0.04 |
| 4837 | NNMT    | 0.00 | 0.00 | 0.00 | NaN   |
| 4842 | NOS1    | 0.02 | 0.00 | 0.10 | 0.25  |
| 4846 | NOS3    | 0.02 | 0.00 | 0.00 | 0.11  |
| 4848 | CNOT2   | 0.12 | 0.00 | 0.05 | 0.44  |
| 4849 | CNOT3   | 0.02 | 0.00 | 0.05 | 0.04  |

|      |         |      |      |      |       |
|------|---------|------|------|------|-------|
| 4850 | CNOT4   | 0.00 | 0.00 | 0.10 | 0.08  |
| 4852 | NPY     | 0.00 | 0.00 | 0.10 | 0.00  |
| 4853 | NOTCH2  | 0.41 | 0.43 | 0.10 | -0.16 |
| 4854 | NOTCH3  | 0.04 | 0.00 | 0.00 | 0.05  |
| 4855 | NOTCH4  | 0.02 | 0.00 | 0.05 | 0.10  |
| 4856 | NOV     | 0.10 | 0.00 | 0.15 | -0.02 |
| 4857 | NOVA1   | 0.04 | 0.00 | 0.00 | -0.09 |
| 4858 | NOVA2   | 0.00 | 0.00 | 0.05 | 0.09  |
| 4860 | NP      | 0.02 | 0.00 | 0.00 | -0.02 |
| 4861 | NPAS1   | 0.00 | 0.00 | 0.05 | 0.24  |
| 4862 | NPAS2   | 0.02 | 0.00 | 0.10 | 0.29  |
| 4863 | NPAT    | 0.02 | 0.00 | 0.00 | 0.08  |
| 4864 | NPC1    | 0.00 | 0.14 | 0.00 | -0.04 |
| 4867 | NPHP1   | 0.02 | 0.00 | 0.00 | 0.27  |
| 4868 | NPHS1   | 0.00 | 0.00 | 0.00 | NaN   |
| 4869 | NPM1    | 0.02 | 0.00 | 0.00 | 0.13  |
| 4879 | NPPB    | 0.02 | 0.00 | 0.00 | -0.07 |
| 4880 | NPPC    | 0.00 | 0.00 | 0.05 | 0.25  |
| 4881 | NPR1    | 0.02 | 0.00 | 0.10 | 0.20  |
| 4882 | NPR2    | 0.00 | 0.00 | 0.00 | NaN   |
| 4883 | NPR3    | 0.00 | 0.00 | 0.10 | 0.23  |
| 4884 | NPTX1   | 0.00 | 0.14 | 0.00 | -0.01 |
| 4885 | NPTX2   | 0.02 | 0.00 | 0.00 | -0.08 |
| 4886 | NPY1R   | 0.00 | 0.00 | 0.05 | -0.15 |
| 4887 | NPY2R   | 0.00 | 0.14 | 0.00 | 0.19  |
| 4888 | NPY6R   | 0.02 | 0.00 | 0.00 | -0.09 |
| 4889 | NPY5R   | 0.00 | 0.00 | 0.05 | -0.04 |
| 4891 | SLC11A2 | 0.02 | 0.00 | 0.00 | 0.22  |
| 4893 | NRAS    | 0.08 | 0.00 | 0.10 | -0.13 |
| 4897 | NRCAM   | 0.00 | 0.00 | 0.00 | NaN   |
| 4898 | NRD1    | 0.02 | 0.00 | 0.00 | 0.03  |
| 4899 | NRF1    | 0.00 | 0.00 | 0.00 | NaN   |
| 4900 | NRGN    | 0.02 | 0.00 | 0.00 | 0.07  |
| 4901 | NRL     | 0.02 | 0.14 | 0.10 | 0.03  |
| 4902 | NRTN    | 0.02 | 0.00 | 0.15 | 0.29  |
| 4905 | NSF     | 0.00 | 0.00 | 0.00 | NaN   |
| 4907 | NTSE    | 0.00 | 0.00 | 0.05 | -0.11 |
| 4908 | NTF3    | 0.02 | 0.00 | 0.15 | 0.03  |
| 4913 | NTHL1   | 0.18 | 0.00 | 0.10 | 0.12  |
| 4914 | NTRK1   | 0.04 | 0.14 | 0.05 | -0.01 |
| 4915 | NTRK2   | 0.00 | 0.00 | 0.00 | NaN   |
| 4916 | NTRK3   | 0.00 | 0.00 | 0.00 | NaN   |
| 4919 | ROR1    | 0.00 | 0.00 | 0.00 | NaN   |
| 4920 | ROR2    | 0.00 | 0.00 | 0.05 | -0.11 |
| 4921 | DDR2    | 0.00 | 0.00 | 0.00 | NaN   |
| 4922 | NTS     | 0.02 | 0.14 | 0.00 | -0.02 |
| 4923 | NTSR1   | 0.08 | 0.00 | 0.05 | -0.06 |



|      |           |      |      |      |       |
|------|-----------|------|------|------|-------|
| 4924 | NUCB1     | 0.06 | 0.00 | 0.05 | 0.18  |
| 4925 | NUCB2     | 0.00 | 0.00 | 0.00 | NaN   |
| 4926 | NUMA1     | 0.06 | 0.00 | 0.15 | -0.09 |
| 4927 | NUP88     | 0.04 | 0.00 | 0.10 | 0.13  |
| 4928 | NUP98     | 0.00 | 0.00 | 0.05 | 0.25  |
| 4929 | NR4A2     | 0.00 | 0.00 | 0.00 | NaN   |
| 4931 | NVL       | 0.02 | 0.00 | 0.05 | -0.04 |
| 4938 | OAS1      | 0.02 | 0.00 | 0.00 | -0.09 |
| 4939 | OAS2      | 0.02 | 0.00 | 0.00 | -0.10 |
| 4940 | OAS3      | 0.02 | 0.00 | 0.00 | -0.09 |
| 4942 | OAT       | 0.04 | 0.00 | 0.05 | -0.01 |
| 4947 | OAZ2      | 0.02 | 0.00 | 0.00 | -0.35 |
| 4948 | OCA2      | 0.00 | 0.00 | 0.00 | NaN   |
| 4950 | OCLN      | 0.06 | 0.00 | 0.00 | 0.02  |
| 4951 | OCM       | 0.02 | 0.00 | 0.00 | -0.08 |
| 4953 | ODC1      | 0.00 | 0.00 | 0.00 | NaN   |
| 4956 | ODF1      | 0.12 | 0.00 | 0.25 | -0.15 |
| 4957 | ODF2      | 0.00 | 0.00 | 0.00 | NaN   |
| 4958 | OMD       | 0.04 | 0.00 | 0.05 | -0.03 |
| 4967 | OGDH      | 0.02 | 0.00 | 0.00 | 0.02  |
| 4968 | OGG1      | 0.00 | 0.00 | 0.10 | 0.00  |
| 4969 | OGN       | 0.04 | 0.00 | 0.05 | -0.01 |
| 4973 | OLR1      | 0.02 | 0.00 | 0.15 | -0.04 |
| 4974 | OMG       | 0.10 | 0.00 | 0.05 | 0.02  |
| 4975 | OMP       | 0.02 | 0.00 | 0.05 | -0.08 |
| 4976 | OPA1      | 0.02 | 0.00 | 0.00 | 0.26  |
| 4978 | OPCML     | 0.00 | 0.00 | 0.00 | NaN   |
| 4982 | TNFRSF11B | 0.10 | 0.00 | 0.15 | -0.04 |
| 4985 | OPRD1     | 0.04 | 0.00 | 0.00 | 0.25  |
| 4986 | OPRK1     | 0.00 | 0.14 | 0.00 | -0.05 |
| 4987 | OPRL1     | 0.08 | 0.00 | 0.05 | -0.10 |
| 4988 | OPRM1     | 0.02 | 0.00 | 0.05 | 0.13  |
| 4990 | SIX6      | 0.00 | 0.14 | 0.00 | 0.10  |
| 4991 | OR1D2     | 0.04 | 0.00 | 0.10 | -0.04 |
| 4992 | OR1F1     | 0.02 | 0.00 | 0.00 | -0.07 |
| 4993 | OR2C1     | 0.02 | 0.00 | 0.00 | 0.03  |
| 4994 | OR3A1     | 0.04 | 0.00 | 0.10 | -0.02 |
| 4995 | OR3A2     | 0.04 | 0.00 | 0.10 | -0.05 |
| 4998 | ORC1L     | 0.02 | 0.00 | 0.00 | -0.03 |
| 4999 | ORC2L     | 0.00 | 0.00 | 0.05 | 0.00  |
| 5000 | ORC4L     | 0.00 | 0.00 | 0.00 | NaN   |
| 5001 | ORC5L     | 0.00 | 0.00 | 0.00 | NaN   |
| 5004 | ORM1      | 0.00 | 0.00 | 0.00 | NaN   |
| 5005 | ORM2      | 0.00 | 0.00 | 0.00 | NaN   |
| 5007 | OSBP      | 0.00 | 0.00 | 0.00 | NaN   |
| 5008 | OSM       | 0.00 | 0.29 | 0.05 | 0.12  |
| 5010 | CLDN11    | 0.00 | 0.00 | 0.00 | NaN   |

|      |          |      |      |      |       |
|------|----------|------|------|------|-------|
| 5016 | OVGP1    | 0.06 | 0.14 | 0.00 | 0.05  |
| 5017 | OVOL1    | 0.04 | 0.00 | 0.05 | -0.02 |
| 5018 | OXA1L    | 0.02 | 0.00 | 0.00 | 0.21  |
| 5020 | OXT      | 0.00 | 0.00 | 0.00 | NaN   |
| 5021 | OXTR     | 0.00 | 0.00 | 0.10 | 0.02  |
| 5023 | P2RX1    | 0.04 | 0.00 | 0.10 | -0.17 |
| 5024 | P2RX3    | 0.00 | 0.00 | 0.00 | NaN   |
| 5025 | P2RX4    | 0.02 | 0.00 | 0.10 | -0.04 |
| 5026 | P2RX5    | 0.04 | 0.00 | 0.10 | -0.05 |
| 5027 | P2RX7    | 0.02 | 0.00 | 0.10 | 0.04  |
| 5028 | P2RY1    | 0.02 | 0.00 | 0.10 | 0.14  |
| 5029 | P2RY2    | 0.02 | 0.00 | 0.00 | 0.54  |
| 5031 | P2RY6    | 0.02 | 0.00 | 0.00 | -0.01 |
| 5032 | P2RY11   | 0.02 | 0.00 | 0.15 | 0.03  |
| 5033 | P4HA1    | 0.00 | 0.00 | 0.00 | NaN   |
| 5034 | P4HB     | 0.00 | 0.00 | 0.00 | NaN   |
| 5042 | PABPC3   | 0.06 | 0.00 | 0.00 | -0.02 |
| 5048 | PAFAH1B1 | 0.04 | 0.00 | 0.05 | 0.21  |
| 5049 | PAFAH1B2 | 0.02 | 0.00 | 0.00 | 0.04  |
| 5050 | PAFAH1B3 | 0.00 | 0.00 | 0.05 | -0.03 |
| 5051 | PAFAH2   | 0.02 | 0.00 | 0.05 | 0.02  |
| 5052 | PRDX1    | 0.02 | 0.00 | 0.05 | 0.29  |
| 5053 | PAH      | 0.00 | 0.00 | 0.00 | NaN   |
| 5054 | SERPINE1 | 0.00 | 0.14 | 0.00 | -0.06 |
| 5055 | SERPINB2 | 0.02 | 0.00 | 0.00 | -0.02 |
| 5058 | PAK1     | 0.02 | 0.00 | 0.05 | 0.46  |
| 5062 | PAK2     | 0.02 | 0.00 | 0.00 | 0.38  |
| 5064 | PALM     | 0.06 | 0.00 | 0.15 | -0.21 |
| 5066 | PAM      | 0.02 | 0.00 | 0.00 | -0.02 |
| 5069 | PAPPA    | 0.02 | 0.00 | 0.00 | 0.00  |
| 5071 | PARK2    | 0.02 | 0.00 | 0.05 | -0.03 |
| 5073 | PARN     | 0.02 | 0.00 | 0.05 | 0.02  |
| 5074 | PAWR     | 0.02 | 0.00 | 0.00 | 0.20  |
| 5076 | PAX2     | 0.00 | 0.00 | 0.00 | NaN   |
| 5077 | PAX3     | 0.00 | 0.00 | 0.00 | NaN   |
| 5078 | PAX4     | 0.02 | 0.00 | 0.00 | 0.02  |
| 5079 | PAX5     | 0.04 | 0.00 | 0.00 | -0.05 |
| 5080 | PAX6     | 0.00 | 0.00 | 0.00 | NaN   |
| 5081 | PAX7     | 0.00 | 0.00 | 0.00 | NaN   |
| 5082 | PDCL     | 0.06 | 0.00 | 0.00 | 0.37  |
| 5083 | PAX9     | 0.04 | 0.00 | 0.00 | -0.02 |
| 5087 | PBX1     | 0.00 | 0.00 | 0.00 | NaN   |
| 5089 | PBX2     | 0.02 | 0.00 | 0.05 | 0.21  |
| 5090 | PBX3     | 0.00 | 0.00 | 0.00 | NaN   |
| 5091 | PC       | 0.04 | 0.00 | 0.05 | 0.08  |
| 5093 | PCBP1    | 0.00 | 0.14 | 0.00 | -0.10 |
| 5094 | PCBP2    | 0.00 | 0.00 | 0.00 | NaN   |

|      |          |      |      |      |       |
|------|----------|------|------|------|-------|
| 5095 | PCCA     | 0.00 | 0.00 | 0.05 | -0.21 |
| 5096 | PCCB     | 0.02 | 0.14 | 0.00 | 0.16  |
| 5097 | PCDH1    | 0.00 | 0.00 | 0.00 | NaN   |
| 5098 | PCDHGC3  | 0.00 | 0.00 | 0.00 | NaN   |
| 5099 | PCDH7    | 0.00 | 0.00 | 0.00 | NaN   |
| 5100 | PCDH8    | 0.04 | 0.00 | 0.10 | 0.34  |
| 5101 | PCDH9    | 0.08 | 0.14 | 0.00 | 0.42  |
| 5104 | SERPINA5 | 0.00 | 0.00 | 0.00 | NaN   |
| 5105 | PCK1     | 0.08 | 0.00 | 0.05 | 0.30  |
| 5106 | PCK2     | 0.02 | 0.14 | 0.10 | -0.01 |
| 5108 | PCM1     | 0.00 | 0.00 | 0.00 | NaN   |
| 5110 | PCMT1    | 0.02 | 0.00 | 0.05 | 0.05  |
| 5111 | PCNA     | 0.00 | 0.00 | 0.10 | -0.04 |
| 5118 | PCOLCE   | 0.00 | 0.00 | 0.00 | NaN   |
| 5121 | PCP4     | 0.00 | 0.00 | 0.00 | NaN   |
| 5122 | PCSK1    | 0.00 | 0.00 | 0.00 | NaN   |
| 5125 | PCSK5    | 0.00 | 0.00 | 0.00 | NaN   |
| 5126 | PCSK2    | 0.02 | 0.00 | 0.00 | -0.04 |
| 5128 | PCK2     | 0.02 | 0.00 | 0.00 | 0.18  |
| 5129 | PCK3     | 0.02 | 0.00 | 0.05 | 0.00  |
| 5130 | PCYT1A   | 0.02 | 0.00 | 0.00 | 0.46  |
| 5132 | PDC      | 0.00 | 0.00 | 0.05 | -0.03 |
| 5133 | PDCD1    | 0.08 | 0.43 | 0.10 | -0.11 |
| 5134 | PDCD2    | 0.04 | 0.00 | 0.05 | 0.01  |
| 5136 | PDE1A    | 0.00 | 0.00 | 0.00 | NaN   |
| 5137 | PDE1C    | 0.02 | 0.00 | 0.00 | -0.09 |
| 5138 | PDE2A    | 0.02 | 0.00 | 0.00 | -0.02 |
| 5139 | PDE3A    | 0.02 | 0.00 | 0.05 | 0.00  |
| 5140 | PDE3B    | 0.00 | 0.00 | 0.15 | -0.04 |
| 5141 | PDE4A    | 0.02 | 0.00 | 0.15 | -0.02 |
| 5142 | PDE4B    | 0.02 | 0.00 | 0.15 | -0.04 |
| 5143 | PDE4C    | 0.02 | 0.00 | 0.00 | 0.03  |
| 5144 | PDE4D    | 0.02 | 0.00 | 0.00 | 0.05  |
| 5145 | PDE6A    | 0.00 | 0.14 | 0.05 | 0.00  |
| 5146 | PDE6C    | 0.02 | 0.00 | 0.05 | -0.15 |
| 5147 | PDE6D    | 0.02 | 0.00 | 0.15 | 0.07  |
| 5148 | PDE6G    | 0.00 | 0.00 | 0.00 | NaN   |
| 5149 | PDE6H    | 0.00 | 0.00 | 0.00 | NaN   |
| 5151 | PDE8A    | 0.00 | 0.00 | 0.00 | NaN   |
| 5152 | PDE9A    | 0.00 | 0.00 | 0.00 | NaN   |
| 5153 | PDE1B    | 0.02 | 0.00 | 0.05 | -0.03 |
| 5154 | PDGFA    | 0.06 | 0.00 | 0.05 | -0.07 |
| 5155 | PDGFB    | 0.00 | 0.14 | 0.05 | -0.10 |
| 5156 | PDGFRA   | 0.00 | 0.00 | 0.00 | NaN   |
| 5157 | PDGFRL   | 0.00 | 0.00 | 0.00 | NaN   |
| 5159 | PDGFRB   | 0.00 | 0.00 | 0.00 | NaN   |
| 5161 | PDHA2    | 0.04 | 0.00 | 0.05 | 0.03  |

|      |          |      |      |      |       |
|------|----------|------|------|------|-------|
| 5162 | PDHB     | 0.02 | 0.00 | 0.00 | -0.12 |
| 5163 | PDK1     | 0.00 | 0.00 | 0.00 | NaN   |
| 5164 | PDK2     | 0.06 | 0.00 | 0.00 | -0.03 |
| 5166 | PDK4     | 0.00 | 0.00 | 0.00 | NaN   |
| 5167 | ENPP1    | 0.02 | 0.00 | 0.00 | 0.12  |
| 5168 | ENPP2    | 0.10 | 0.00 | 0.15 | -0.05 |
| 5169 | ENPP3    | 0.02 | 0.00 | 0.00 | 0.06  |
| 5170 | PDPK1    | 0.02 | 0.00 | 0.00 | 0.03  |
| 5172 | SLC26A4  | 0.00 | 0.00 | 0.00 | NaN   |
| 5173 | PDYN     | 0.00 | 0.00 | 0.00 | NaN   |
| 5174 | PDZK1    | 0.02 | 0.00 | 0.00 | -0.06 |
| 5175 | PECAM1   | 0.12 | 0.00 | 0.20 | 0.04  |
| 5176 | SERPINF1 | 0.04 | 0.00 | 0.05 | -0.15 |
| 5178 | PEG3     | 0.00 | 0.00 | 0.05 | 0.17  |
| 5179 | PENK     | 0.04 | 0.00 | 0.00 | 0.01  |
| 5184 | PEPD     | 0.00 | 0.00 | 0.00 | NaN   |
| 5187 | PER1     | 0.00 | 0.00 | 0.00 | NaN   |
| 5188 | PET112L  | 0.00 | 0.00 | 0.00 | NaN   |
| 5189 | PEX1     | 0.00 | 0.00 | 0.00 | NaN   |
| 5190 | PEX6     | 0.06 | 0.00 | 0.05 | -0.09 |
| 5191 | PEX7     | 0.00 | 0.00 | 0.10 | -0.10 |
| 5193 | PEX12    | 0.06 | 0.00 | 0.00 | 0.13  |
| 5194 | PEX13    | 0.00 | 0.00 | 0.05 | 0.08  |
| 5195 | PEX14    | 0.02 | 0.00 | 0.00 | 0.06  |
| 5196 | PF4      | 0.00 | 0.00 | 0.00 | NaN   |
| 5197 | PF4V1    | 0.00 | 0.00 | 0.00 | NaN   |
| 5198 | PFAS     | 0.00 | 0.00 | 0.00 | NaN   |
| 5201 | PFDN1    | 0.00 | 0.00 | 0.00 | NaN   |
| 5202 | PFDN2    | 0.00 | 0.00 | 0.00 | NaN   |
| 5203 | PFDN4    | 0.14 | 0.00 | 0.05 | 0.36  |
| 5204 | PFDN5    | 0.00 | 0.00 | 0.00 | NaN   |
| 5205 | ATP8B1   | 0.00 | 0.00 | 0.15 | -0.09 |
| 5208 | PFKFB2   | 0.00 | 0.00 | 0.05 | 0.18  |
| 5209 | PFKFB3   | 0.00 | 0.00 | 0.00 | NaN   |
| 5210 | PFKFB4   | 0.00 | 0.00 | 0.05 | 0.00  |
| 5211 | PFKL     | 0.02 | 0.00 | 0.00 | 0.02  |
| 5213 | PFKM     | 0.04 | 0.00 | 0.05 | 0.17  |
| 5214 | PFKP     | 0.02 | 0.00 | 0.00 | -0.03 |
| 5216 | PFN1     | 0.04 | 0.00 | 0.10 | 0.16  |
| 5217 | PFN2     | 0.00 | 0.00 | 0.00 | NaN   |
| 5218 | PFTK1    | 0.00 | 0.00 | 0.00 | NaN   |
| 5223 | PGAM1    | 0.00 | 0.00 | 0.05 | 0.02  |
| 5224 | PGAM2    | 0.00 | 0.00 | 0.00 | NaN   |
| 5225 | PGC      | 0.06 | 0.00 | 0.05 | 0.07  |
| 5226 | PGD      | 0.02 | 0.00 | 0.00 | 0.16  |
| 5228 | PGF      | 0.02 | 0.00 | 0.05 | 0.09  |
| 5229 | PGGT1B   | 0.02 | 0.00 | 0.00 | -0.02 |

|      |           |      |      |      |       |
|------|-----------|------|------|------|-------|
| 5236 | PGM1      | 0.00 | 0.00 | 0.00 | NaN   |
| 5239 | PGM5      | 0.00 | 0.00 | 0.00 | NaN   |
| 5241 | PGR       | 0.00 | 0.00 | 0.00 | NaN   |
| 5243 | ABCB1     | 0.00 | 0.00 | 0.00 | NaN   |
| 5244 | ABCB4     | 0.00 | 0.00 | 0.00 | NaN   |
| 5245 | PHB       | 0.04 | 0.00 | 0.05 | 0.07  |
| 5250 | SLC25A3   | 0.04 | 0.14 | 0.05 | -0.14 |
| 5252 | PHF1      | 0.02 | 0.00 | 0.05 | 0.18  |
| 5253 | PHF2      | 0.04 | 0.00 | 0.05 | -0.11 |
| 5257 | PHKB      | 0.43 | 0.29 | 0.15 | -0.32 |
| 5260 | PHKG1     | 0.04 | 0.14 | 0.20 | 0.05  |
| 5261 | PHKG2     | 0.02 | 0.00 | 0.00 | -0.04 |
| 5264 | PHYH      | 0.00 | 0.14 | 0.00 | 0.21  |
| 5265 | SERPINA1  | 0.00 | 0.00 | 0.00 | NaN   |
| 5266 | PI3       | 0.04 | 0.00 | 0.00 | 0.01  |
| 5267 | SERPINA4  | 0.00 | 0.00 | 0.00 | NaN   |
| 5268 | SERPINB5  | 0.02 | 0.00 | 0.00 | -0.05 |
| 5271 | SERPINB8  | 0.02 | 0.00 | 0.00 | -0.08 |
| 5273 | SERPINB10 | 0.02 | 0.00 | 0.00 | 0.00  |
| 5274 | SERPINI1  | 0.00 | 0.00 | 0.00 | NaN   |
| 5275 | SERPINB13 | 0.02 | 0.00 | 0.00 | -0.02 |
| 5276 | SERPINI2  | 0.00 | 0.00 | 0.00 | NaN   |
| 5279 | PIGC      | 0.04 | 0.00 | 0.05 | 0.23  |
| 5281 | PIGF      | 0.00 | 0.00 | 0.00 | NaN   |
| 5283 | PIGH      | 0.00 | 0.00 | 0.05 | -0.06 |
| 5284 | PIGR      | 0.00 | 0.00 | 0.05 | -0.01 |
| 5287 | PIK3C2B   | 0.00 | 0.00 | 0.00 | NaN   |
| 5288 | PIK3C2G   | 0.02 | 0.00 | 0.00 | -0.01 |
| 5289 | PIK3C3    | 0.02 | 0.00 | 0.00 | 0.06  |
| 5290 | PIK3CA    | 0.00 | 0.00 | 0.00 | NaN   |
| 5291 | PIK3CB    | 0.00 | 0.00 | 0.00 | NaN   |
| 5292 | PIM1      | 0.00 | 0.00 | 0.00 | NaN   |
| 5293 | PIK3CD    | 0.00 | 0.00 | 0.00 | NaN   |
| 5294 | PIK3CG    | 0.00 | 0.00 | 0.10 | -0.04 |
| 5295 | PIK3R1    | 0.00 | 0.00 | 0.00 | NaN   |
| 5296 | PIK3R2    | 0.02 | 0.00 | 0.00 | 0.14  |
| 5300 | PIN1      | 0.02 | 0.00 | 0.15 | 0.02  |
| 5301 | PIN1L     | 0.04 | 0.14 | 0.00 | -0.03 |
| 5304 | PIP       | 0.00 | 0.14 | 0.05 | 0.22  |
| 5307 | PITX1     | 0.00 | 0.00 | 0.00 | NaN   |
| 5308 | PITX2     | 0.00 | 0.00 | 0.00 | NaN   |
| 5309 | PITX3     | 0.02 | 0.00 | 0.00 | 0.05  |
| 5310 | PKD1      | 0.18 | 0.00 | 0.10 | 0.06  |
| 5311 | PKD2      | 0.02 | 0.00 | 0.00 | -0.02 |
| 5313 | PKLR      | 0.04 | 0.00 | 0.15 | -0.10 |
| 5315 | PKM2      | 0.04 | 0.00 | 0.05 | 0.15  |
| 5316 | PKNOX1    | 0.00 | 0.00 | 0.00 | NaN   |

|      |          |      |      |      |       |
|------|----------|------|------|------|-------|
| 5317 | PKP1     | 0.00 | 0.00 | 0.05 | -0.05 |
| 5318 | PKP2     | 0.02 | 0.00 | 0.00 | 0.02  |
| 5319 | PLA2G1B  | 0.02 | 0.00 | 0.10 | -0.03 |
| 5320 | PLA2G2A  | 0.02 | 0.00 | 0.05 | -0.03 |
| 5321 | PLA2G4A  | 0.00 | 0.00 | 0.05 | 0.31  |
| 5322 | PLA2G5   | 0.02 | 0.00 | 0.05 | 0.07  |
| 5324 | PLAG1    | 0.04 | 0.00 | 0.00 | -0.02 |
| 5325 | PLAGL1   | 0.02 | 0.00 | 0.05 | -0.02 |
| 5326 | PLAGL2   | 0.04 | 0.00 | 0.15 | 0.02  |
| 5327 | PLAT     | 0.04 | 0.14 | 0.05 | -0.10 |
| 5328 | PLAU     | 0.02 | 0.00 | 0.00 | 0.04  |
| 5329 | PLAUR    | 0.00 | 0.00 | 0.00 | NaN   |
| 5330 | PLCB2    | 0.00 | 0.00 | 0.00 | NaN   |
| 5332 | PLCB4    | 0.00 | 0.00 | 0.05 | 0.01  |
| 5333 | PLCD1    | 0.00 | 0.00 | 0.15 | 0.00  |
| 5334 | PLCL1    | 0.00 | 0.00 | 0.05 | -0.05 |
| 5335 | PLCG1    | 0.04 | 0.00 | 0.00 | 0.32  |
| 5336 | PLCG2    | 0.02 | 0.00 | 0.00 | -0.02 |
| 5337 | PLD1     | 0.02 | 0.00 | 0.00 | 0.08  |
| 5338 | PLD2     | 0.04 | 0.00 | 0.10 | 0.06  |
| 5339 | PLEC1    | 0.10 | 0.00 | 0.15 | 0.28  |
| 5340 | PLG      | 0.02 | 0.00 | 0.05 | -0.04 |
| 5341 | PLEK     | 0.00 | 0.00 | 0.00 | NaN   |
| 5345 | SERPINF2 | 0.04 | 0.00 | 0.05 | 0.08  |
| 5346 | PLIN     | 0.00 | 0.00 | 0.00 | NaN   |
| 5348 | FXYD1    | 0.00 | 0.00 | 0.00 | NaN   |
| 5349 | FXYD3    | 0.00 | 0.00 | 0.00 | NaN   |
| 5350 | PLN      | 0.06 | 0.00 | 0.05 | -0.04 |
| 5352 | PLOD2    | 0.04 | 0.00 | 0.00 | -0.03 |
| 5357 | PLS1     | 0.02 | 0.00 | 0.00 | -0.13 |
| 5359 | PLSCR1   | 0.04 | 0.00 | 0.00 | 0.03  |
| 5360 | PLTP     | 0.02 | 0.00 | 0.00 | -0.21 |
| 5361 | PLXNA1   | 0.02 | 0.00 | 0.00 | 0.26  |
| 5362 | PLXNA2   | 0.00 | 0.00 | 0.05 | 0.01  |
| 5364 | PLXNB1   | 0.00 | 0.00 | 0.05 | -0.03 |
| 5366 | PMAIP1   | 0.00 | 0.00 | 0.05 | -0.04 |
| 5367 | PMCH     | 0.00 | 0.00 | 0.00 | NaN   |
| 5368 | PNOC     | 0.00 | 0.00 | 0.00 | NaN   |
| 5371 | PML      | 0.02 | 0.00 | 0.00 | 0.22  |
| 5372 | PMM1     | 0.00 | 0.14 | 0.00 | -0.06 |
| 5373 | PMM2     | 0.00 | 0.00 | 0.00 | NaN   |
| 5375 | PMP2     | 0.06 | 0.00 | 0.15 | 0.03  |
| 5376 | PMP22    | 0.00 | 0.00 | 0.00 | NaN   |
| 5378 | PMS1     | 0.00 | 0.00 | 0.05 | -0.26 |
| 5379 | PMS2L1   | 0.02 | 0.00 | 0.00 | 0.08  |
| 5380 | PMS2L2   | 0.00 | 0.00 | 0.00 | NaN   |
| 5381 | PMS2L3   | 0.00 | 0.00 | 0.00 | NaN   |

|      |          |      |      |      |       |
|------|----------|------|------|------|-------|
| 5382 | PMS2L4   | 0.04 | 0.00 | 0.00 | 0.00  |
| 5389 | PMS2L11  | 0.00 | 0.00 | 0.00 | NaN   |
| 5395 | PMS2     | 0.02 | 0.00 | 0.00 | -0.25 |
| 5406 | PNLIP    | 0.04 | 0.14 | 0.05 | -0.04 |
| 5407 | PNLIPRP1 | 0.04 | 0.14 | 0.05 | 0.07  |
| 5408 | PNLIPRP2 | 0.04 | 0.14 | 0.05 | -0.12 |
| 5409 | PNMT     | 0.02 | 0.86 | 0.05 | 0.29  |
| 5411 | PNN      | 0.00 | 0.00 | 0.10 | 0.16  |
| 5412 | UBL3     | 0.04 | 0.14 | 0.00 | 0.11  |
| 5420 | PODXL    | 0.00 | 0.00 | 0.00 | NaN   |
| 5423 | POLB     | 0.04 | 0.14 | 0.05 | 0.19  |
| 5424 | POLD1    | 0.00 | 0.00 | 0.00 | NaN   |
| 5425 | POLD2    | 0.00 | 0.00 | 0.00 | NaN   |
| 5426 | POLE     | 0.08 | 0.14 | 0.05 | -0.10 |
| 5427 | POLE2    | 0.00 | 0.00 | 0.00 | NaN   |
| 5428 | POLG     | 0.00 | 0.00 | 0.00 | NaN   |
| 5429 | POLH     | 0.00 | 0.00 | 0.00 | NaN   |
| 5430 | POLR2A   | 0.02 | 0.00 | 0.00 | 0.08  |
| 5431 | POLR2B   | 0.06 | 0.00 | 0.00 | 0.31  |
| 5432 | POLR2C   | 0.02 | 0.00 | 0.00 | 0.17  |
| 5433 | POLR2D   | 0.00 | 0.00 | 0.10 | 0.07  |
| 5434 | POLR2E   | 0.02 | 0.00 | 0.05 | 0.10  |
| 5435 | POLR2F   | 0.00 | 0.14 | 0.00 | -0.12 |
| 5436 | POLR2G   | 0.00 | 0.00 | 0.05 | -0.09 |
| 5437 | POLR2H   | 0.02 | 0.14 | 0.00 | -0.08 |
| 5438 | POLR2I   | 0.02 | 0.00 | 0.05 | 0.11  |
| 5439 | POLR2J   | 0.00 | 0.00 | 0.00 | NaN   |
| 5440 | POLR2K   | 0.12 | 0.00 | 0.25 | 0.34  |
| 5441 | POLR2L   | 0.02 | 0.00 | 0.05 | 0.05  |
| 5442 | POLRMT   | 0.06 | 0.00 | 0.15 | 0.15  |
| 5443 | POMC     | 0.00 | 0.00 | 0.00 | NaN   |
| 5444 | PON1     | 0.00 | 0.00 | 0.00 | NaN   |
| 5445 | PON2     | 0.00 | 0.00 | 0.00 | NaN   |
| 5446 | PON3     | 0.00 | 0.00 | 0.00 | NaN   |
| 5447 | POR      | 0.00 | 0.00 | 0.00 | NaN   |
| 5449 | POU1F1   | 0.16 | 0.14 | 0.30 | -0.06 |
| 5450 | POU2AF1  | 0.02 | 0.00 | 0.05 | 0.13  |
| 5451 | POU2F1   | 0.00 | 0.00 | 0.10 | -0.02 |
| 5452 | POU2F2   | 0.00 | 0.00 | 0.05 | 0.28  |
| 5453 | POU3F1   | 0.04 | 0.00 | 0.05 | -0.01 |
| 5454 | POU3F2   | 0.08 | 0.00 | 0.00 | 0.16  |
| 5455 | POU3F3   | 0.02 | 0.00 | 0.10 | -0.01 |
| 5457 | POU4F1   | 0.02 | 0.00 | 0.00 | 0.01  |
| 5458 | POU4F2   | 0.02 | 0.00 | 0.05 | -0.04 |
| 5459 | POU4F3   | 0.00 | 0.00 | 0.00 | NaN   |
| 5460 | POU5F1   | 0.04 | 0.14 | 0.05 | -0.02 |
| 5463 | POU6F1   | 0.00 | 0.00 | 0.00 | NaN   |

|      |         |      |      |      |       |
|------|---------|------|------|------|-------|
| 5465 | PPARA   | 0.02 | 0.14 | 0.05 | 0.09  |
| 5467 | PPARD   | 0.04 | 0.00 | 0.00 | 0.00  |
| 5468 | PPARG   | 0.00 | 0.00 | 0.05 | -0.03 |
| 5470 | PPEF2   | 0.00 | 0.00 | 0.00 | NaN   |
| 5471 | PPAT    | 0.04 | 0.00 | 0.00 | 0.04  |
| 5473 | PPBP    | 0.00 | 0.00 | 0.00 | NaN   |
| 5478 | PPIA    | 0.02 | 0.00 | 0.00 | 0.27  |
| 5479 | PPIB    | 0.02 | 0.00 | 0.00 | 0.28  |
| 5480 | PPIC    | 0.00 | 0.00 | 0.00 | NaN   |
| 5481 | PPID    | 0.02 | 0.00 | 0.00 | -0.15 |
| 5493 | PPL     | 0.00 | 0.00 | 0.00 | NaN   |
| 5494 | PPM1A   | 0.02 | 0.14 | 0.00 | 0.06  |
| 5495 | PPM1B   | 0.02 | 0.00 | 0.05 | -0.22 |
| 5496 | PPM1G   | 0.00 | 0.00 | 0.00 | NaN   |
| 5498 | PPOX    | 0.00 | 0.00 | 0.00 | NaN   |
| 5499 | PPP1CA  | 0.04 | 0.00 | 0.00 | 0.58  |
| 5500 | PPP1CB  | 0.00 | 0.00 | 0.00 | NaN   |
| 5501 | PPP1CC  | 0.02 | 0.00 | 0.00 | -0.09 |
| 5502 | PPP1R1A | 0.02 | 0.00 | 0.05 | 0.10  |
| 5504 | PPP1R2  | 0.02 | 0.00 | 0.00 | 0.13  |
| 5506 | PPP1R3A | 0.00 | 0.00 | 0.00 | NaN   |
| 5507 | PPP1R3C | 0.02 | 0.00 | 0.05 | -0.08 |
| 5509 | PPP1R3D | 0.12 | 0.00 | 0.00 | 0.16  |
| 5510 | PPP1R7  | 0.08 | 0.43 | 0.10 | 0.04  |
| 5511 | PPP1R8  | 0.04 | 0.00 | 0.00 | -0.47 |
| 5514 | PPP1R10 | 0.04 | 0.14 | 0.05 | 0.07  |
| 5515 | PPP2CA  | 0.00 | 0.00 | 0.00 | NaN   |
| 5516 | PPP2CB  | 0.04 | 0.00 | 0.00 | 0.02  |
| 5518 | PPP2R1A | 0.02 | 0.00 | 0.05 | -0.05 |
| 5519 | PPP2R1B | 0.00 | 0.00 | 0.05 | -0.06 |
| 5520 | PPP2R2A | 0.02 | 0.00 | 0.00 | -0.30 |
| 5521 | PPP2R2B | 0.00 | 0.00 | 0.00 | NaN   |
| 5523 | PPP2R3A | 0.00 | 0.00 | 0.00 | NaN   |
| 5524 | PPP2R4  | 0.00 | 0.00 | 0.00 | NaN   |
| 5525 | PPP2R5A | 0.02 | 0.00 | 0.15 | -0.05 |
| 5526 | PPP2R5B | 0.02 | 0.00 | 0.00 | -0.03 |
| 5527 | PPP2R5C | 0.02 | 0.00 | 0.00 | -0.05 |
| 5528 | PPP2R5D | 0.06 | 0.00 | 0.05 | 0.00  |
| 5529 | PPP2R5E | 0.00 | 0.00 | 0.00 | NaN   |
| 5530 | PPP3CA  | 0.08 | 0.00 | 0.00 | 0.24  |
| 5531 | PPP4C   | 0.02 | 0.00 | 0.00 | 0.00  |
| 5532 | PPP3CB  | 0.00 | 0.00 | 0.00 | NaN   |
| 5533 | PPP3CC  | 0.00 | 0.00 | 0.05 | -0.03 |
| 5534 | PPP3R1  | 0.00 | 0.00 | 0.00 | NaN   |
| 5536 | PPP5C   | 0.00 | 0.00 | 0.05 | 0.31  |
| 5537 | PPP6C   | 0.06 | 0.00 | 0.00 | -0.05 |
| 5538 | PPT1    | 0.02 | 0.00 | 0.05 | -0.20 |



|      |         |      |      |      |       |
|------|---------|------|------|------|-------|
| 5539 | PPY     | 0.00 | 0.14 | 0.05 | 0.00  |
| 5540 | PPYR1   | 0.02 | 0.00 | 0.10 | 0.03  |
| 5542 | PRB1    | 0.02 | 0.00 | 0.15 | -0.01 |
| 5543 | PRB2    | 0.02 | 0.00 | 0.15 | -0.02 |
| 5544 | PRB3    | 0.02 | 0.00 | 0.15 | -0.05 |
| 5546 | PRCC    | 0.04 | 0.14 | 0.05 | -0.08 |
| 5547 | PRCP    | 0.02 | 0.00 | 0.00 | -0.10 |
| 5549 | PRELP   | 0.00 | 0.00 | 0.00 | NaN   |
| 5550 | PREP    | 0.04 | 0.00 | 0.00 | 0.36  |
| 5551 | PRF1    | 0.00 | 0.00 | 0.00 | NaN   |
| 5552 | PRG1    | 0.00 | 0.00 | 0.00 | NaN   |
| 5553 | PRG2    | 0.00 | 0.00 | 0.00 | NaN   |
| 5554 | PRH1    | 0.02 | 0.00 | 0.15 | 0.04  |
| 5557 | PRIM1   | 0.00 | 0.00 | 0.00 | NaN   |
| 5563 | PRKAA2  | 0.02 | 0.00 | 0.00 | -0.05 |
| 5564 | PRKAB1  | 0.02 | 0.00 | 0.10 | 0.01  |
| 5565 | PRKAB2  | 0.02 | 0.00 | 0.00 | -0.08 |
| 5566 | PRKACA  | 0.00 | 0.00 | 0.00 | NaN   |
| 5567 | PRKACB  | 0.04 | 0.00 | 0.05 | -0.02 |
| 5568 | PRKACG  | 0.00 | 0.00 | 0.00 | NaN   |
| 5569 | PKIA    | 0.02 | 0.00 | 0.00 | 0.21  |
| 5571 | PRKAG1  | 0.00 | 0.00 | 0.00 | NaN   |
| 5573 | PRKAR1A | 0.12 | 0.00 | 0.20 | 0.13  |
| 5575 | PRKAR1B | 0.06 | 0.00 | 0.05 | 0.01  |
| 5576 | PRKAR2A | 0.00 | 0.00 | 0.05 | 0.30  |
| 5577 | PRKAR2B | 0.00 | 0.00 | 0.05 | -0.13 |
| 5578 | PRKCA   | 0.12 | 0.00 | 0.20 | 0.09  |
| 5580 | PRKCD   | 0.00 | 0.00 | 0.10 | -0.14 |
| 5581 | PRKCE   | 0.02 | 0.00 | 0.05 | 0.26  |
| 5582 | PRKCG   | 0.02 | 0.00 | 0.05 | -0.12 |
| 5583 | PRKCH   | 0.00 | 0.14 | 0.00 | 0.18  |
| 5584 | PRKCI   | 0.00 | 0.00 | 0.05 | 0.13  |
| 5588 | PRKCQ   | 0.00 | 0.00 | 0.00 | NaN   |
| 5589 | PRKCSH  | 0.02 | 0.00 | 0.00 | 0.07  |
| 5591 | PRKDC   | 0.04 | 0.00 | 0.00 | -0.06 |
| 5592 | PRKG1   | 0.00 | 0.00 | 0.05 | 0.04  |
| 5593 | PRKG2   | 0.02 | 0.00 | 0.00 | -0.09 |
| 5594 | MAPK1   | 0.06 | 0.14 | 0.15 | 0.11  |
| 5595 | MAPK3   | 0.02 | 0.00 | 0.00 | -0.08 |
| 5596 | MAPK4   | 0.00 | 0.00 | 0.05 | 0.17  |
| 5597 | MAPK6   | 0.00 | 0.00 | 0.00 | NaN   |
| 5598 | MAPK7   | 0.02 | 0.00 | 0.00 | -0.01 |
| 5599 | MAPK8   | 0.02 | 0.00 | 0.10 | -0.13 |
| 5600 | MAPK11  | 0.02 | 0.14 | 0.05 | 0.23  |
| 5602 | MAPK10  | 0.00 | 0.00 | 0.00 | NaN   |
| 5603 | MAPK13  | 0.04 | 0.00 | 0.00 | -0.09 |
| 5604 | MAP2K1  | 0.04 | 0.00 | 0.00 | -0.08 |

|      |         |      |      |      |       |
|------|---------|------|------|------|-------|
| 5605 | MAP2K2  | 0.02 | 0.00 | 0.15 | 0.21  |
| 5606 | MAP2K3  | 0.10 | 0.00 | 0.05 | -0.26 |
| 5607 | MAP2K5  | 0.02 | 0.00 | 0.00 | 0.31  |
| 5608 | MAP2K6  | 0.12 | 0.00 | 0.20 | 0.11  |
| 5609 | MAP2K7  | 0.02 | 0.00 | 0.15 | 0.00  |
| 5611 | DNAJC3  | 0.04 | 0.00 | 0.00 | -0.03 |
| 5612 | PRKRIR  | 0.04 | 0.00 | 0.05 | 0.12  |
| 5617 | PRL     | 0.02 | 0.14 | 0.00 | 0.09  |
| 5618 | PRLR    | 0.02 | 0.14 | 0.05 | -0.06 |
| 5619 | PRM1    | 0.02 | 0.00 | 0.00 | 0.16  |
| 5620 | PRM2    | 0.02 | 0.00 | 0.00 | 0.10  |
| 5621 | PRNP    | 0.00 | 0.00 | 0.10 | 0.33  |
| 5623 | PSPN    | 0.02 | 0.00 | 0.15 | -0.13 |
| 5624 | PROC    | 0.00 | 0.00 | 0.10 | 0.08  |
| 5625 | PRODH   | 0.02 | 0.14 | 0.20 | 0.02  |
| 5626 | PROP1   | 0.00 | 0.29 | 0.00 | 0.00  |
| 5627 | PROS1   | 0.16 | 0.14 | 0.30 | 0.19  |
| 5629 | PROX1   | 0.02 | 0.00 | 0.15 | -0.06 |
| 5630 | PRPH    | 0.00 | 0.00 | 0.00 | NaN   |
| 5635 | PRPSAP1 | 0.00 | 0.14 | 0.05 | 0.20  |
| 5636 | PRPSAP2 | 0.02 | 0.00 | 0.00 | 0.17  |
| 5639 | PRRG2   | 0.02 | 0.00 | 0.05 | 0.02  |
| 5641 | LGMN    | 0.02 | 0.00 | 0.00 | -0.26 |
| 5644 | PRSS1   | 0.00 | 0.14 | 0.05 | -0.08 |
| 5645 | PRSS2   | 0.00 | 0.14 | 0.05 | -0.05 |
| 5646 | PRSS3   | 0.04 | 0.00 | 0.00 | 0.07  |
| 5648 | MASP1   | 0.02 | 0.14 | 0.00 | 0.15  |
| 5649 | RELN    | 0.00 | 0.00 | 0.00 | NaN   |
| 5650 | KLK7    | 0.00 | 0.00 | 0.00 | NaN   |
| 5651 | PRSS7   | 0.02 | 0.00 | 0.00 | -0.08 |
| 5652 | PRSS8   | 0.02 | 0.00 | 0.00 | -0.01 |
| 5653 | KLK6    | 0.00 | 0.00 | 0.00 | NaN   |
| 5655 | KLK10   | 0.02 | 0.00 | 0.05 | 0.17  |
| 5657 | PRTN3   | 0.06 | 0.00 | 0.15 | -0.03 |
| 5660 | PSAP    | 0.04 | 0.00 | 0.05 | 0.02  |
| 5662 | PSD     | 0.02 | 0.00 | 0.00 | -0.01 |
| 5663 | PSEN1   | 0.02 | 0.00 | 0.05 | 0.09  |
| 5664 | PSEN2   | 0.00 | 0.00 | 0.05 | 0.10  |
| 5669 | PSG1    | 0.00 | 0.00 | 0.00 | NaN   |
| 5670 | PSG2    | 0.00 | 0.00 | 0.00 | NaN   |
| 5671 | PSG3    | 0.00 | 0.00 | 0.00 | NaN   |
| 5672 | PSG4    | 0.00 | 0.00 | 0.00 | NaN   |
| 5673 | PSG5    | 0.00 | 0.00 | 0.00 | NaN   |
| 5675 | PSG6    | 0.00 | 0.00 | 0.00 | NaN   |
| 5676 | PSG7    | 0.00 | 0.00 | 0.00 | NaN   |
| 5678 | PSG9    | 0.00 | 0.00 | 0.00 | NaN   |
| 5680 | PSG11   | 0.00 | 0.00 | 0.00 | NaN   |

|      |        |      |      |      |       |
|------|--------|------|------|------|-------|
| 5682 | PSMA1  | 0.00 | 0.00 | 0.15 | 0.27  |
| 5683 | PSMA2  | 0.00 | 0.00 | 0.00 | NaN   |
| 5684 | PSMA3  | 0.02 | 0.14 | 0.00 | 0.03  |
| 5685 | PSMA4  | 0.00 | 0.00 | 0.05 | 0.08  |
| 5686 | PSMA5  | 0.00 | 0.00 | 0.00 | NaN   |
| 5687 | PSMA6  | 0.04 | 0.00 | 0.00 | 0.10  |
| 5688 | PSMA7  | 0.08 | 0.00 | 0.05 | 0.16  |
| 5689 | PSMB1  | 0.02 | 0.00 | 0.05 | 0.00  |
| 5690 | PSMB2  | 0.00 | 0.00 | 0.00 | NaN   |
| 5691 | PSMB3  | 0.02 | 0.86 | 0.05 | 0.42  |
| 5692 | PSMB4  | 0.02 | 0.00 | 0.10 | 0.23  |
| 5693 | PSMB5  | 0.00 | 0.00 | 0.00 | NaN   |
| 5694 | PSMB6  | 0.04 | 0.00 | 0.10 | 0.16  |
| 5695 | PSMB7  | 0.06 | 0.00 | 0.00 | -0.13 |
| 5696 | PSMB8  | 0.02 | 0.00 | 0.05 | 0.03  |
| 5697 | PYY    | 0.00 | 0.14 | 0.05 | 0.16  |
| 5698 | PSMB9  | 0.02 | 0.00 | 0.05 | 0.02  |
| 5699 | PSMB10 | 0.02 | 0.00 | 0.00 | 0.03  |
| 5700 | PSMC1  | 0.00 | 0.00 | 0.00 | NaN   |
| 5702 | PSMC3  | 0.04 | 0.00 | 0.00 | 0.06  |
| 5704 | PSMC4  | 0.06 | 0.00 | 0.05 | 0.16  |
| 5705 | PSMC5  | 0.12 | 0.00 | 0.20 | 0.38  |
| 5706 | PSMC6  | 0.02 | 0.00 | 0.00 | 0.40  |
| 5707 | PSMD1  | 0.02 | 0.00 | 0.15 | 0.09  |
| 5708 | PSMD2  | 0.02 | 0.14 | 0.00 | -0.05 |
| 5709 | PSMD3  | 0.02 | 0.86 | 0.05 | 0.55  |
| 5710 | PSMD4  | 0.02 | 0.00 | 0.10 | 0.28  |
| 5711 | PSMD5  | 0.00 | 0.00 | 0.00 | NaN   |
| 5713 | PSMD7  | 0.00 | 0.00 | 0.00 | NaN   |
| 5714 | PSMD8  | 0.00 | 0.00 | 0.00 | NaN   |
| 5715 | PSMD9  | 0.02 | 0.00 | 0.10 | 0.09  |
| 5717 | PSMD11 | 0.04 | 0.00 | 0.05 | 0.30  |
| 5718 | PSMD12 | 0.12 | 0.00 | 0.20 | 0.16  |
| 5719 | PSMD13 | 0.06 | 0.29 | 0.10 | 0.12  |
| 5720 | PSME1  | 0.02 | 0.14 | 0.10 | 0.01  |
| 5721 | PSME2  | 0.02 | 0.14 | 0.10 | 0.06  |
| 5723 | PSPH   | 0.04 | 0.14 | 0.20 | -0.10 |
| 5724 | PTAFR  | 0.04 | 0.00 | 0.00 | 0.34  |
| 5725 | PTBP1  | 0.06 | 0.00 | 0.15 | 0.09  |
| 5728 | PTEN   | 0.00 | 0.00 | 0.00 | NaN   |
| 5729 | PTGDR  | 0.02 | 0.00 | 0.00 | 0.03  |
| 5731 | PTGER1 | 0.00 | 0.00 | 0.05 | 0.16  |
| 5732 | PTGER2 | 0.02 | 0.00 | 0.00 | 0.09  |
| 5733 | PTGER3 | 0.04 | 0.14 | 0.00 | 0.11  |
| 5734 | PTGER4 | 0.04 | 0.00 | 0.00 | 0.01  |
| 5737 | PTGFR  | 0.00 | 0.00 | 0.00 | NaN   |
| 5739 | PTGIR  | 0.00 | 0.00 | 0.05 | 0.05  |

|      |         |      |      |      |       |
|------|---------|------|------|------|-------|
| 5740 | PTGIS   | 0.06 | 0.00 | 0.00 | 0.14  |
| 5741 | PTH     | 0.00 | 0.00 | 0.00 | NaN   |
| 5742 | PTGS1   | 0.06 | 0.00 | 0.00 | 0.16  |
| 5743 | PTGS2   | 0.00 | 0.00 | 0.05 | 0.06  |
| 5744 | PTHLH   | 0.00 | 0.00 | 0.00 | NaN   |
| 5747 | PTK2    | 0.10 | 0.00 | 0.15 | 0.38  |
| 5753 | PTK6    | 0.08 | 0.00 | 0.05 | 0.23  |
| 5754 | PTK7    | 0.00 | 0.00 | 0.00 | NaN   |
| 5757 | PTMA    | 0.02 | 0.00 | 0.15 | -0.05 |
| 5763 | PTMS    | 0.02 | 0.00 | 0.15 | 0.10  |
| 5764 | PTN     | 0.00 | 0.00 | 0.00 | NaN   |
| 5770 | PTPN1   | 0.10 | 0.00 | 0.00 | 0.23  |
| 5771 | PTPN2   | 0.00 | 0.00 | 0.05 | 0.15  |
| 5774 | PTPN3   | 0.00 | 0.00 | 0.00 | NaN   |
| 5775 | PTPN4   | 0.00 | 0.00 | 0.10 | -0.17 |
| 5777 | PTPN6   | 0.02 | 0.00 | 0.15 | 0.05  |
| 5778 | PTPN7   | 0.02 | 0.00 | 0.00 | -0.03 |
| 5780 | PTPN9   | 0.00 | 0.00 | 0.05 | -0.05 |
| 5781 | PTPN11  | 0.02 | 0.00 | 0.00 | 0.14  |
| 5782 | PTPN12  | 0.00 | 0.00 | 0.00 | NaN   |
| 5783 | PTPN13  | 0.00 | 0.00 | 0.00 | NaN   |
| 5784 | PTPN14  | 0.02 | 0.00 | 0.15 | 0.22  |
| 5786 | PTPRA   | 0.00 | 0.00 | 0.00 | NaN   |
| 5787 | PTPRB   | 0.12 | 0.00 | 0.05 | -0.01 |
| 5788 | PTPRC   | 0.02 | 0.00 | 0.00 | -0.02 |
| 5789 | PTPRD   | 0.02 | 0.00 | 0.00 | -0.11 |
| 5790 | PTPRCAP | 0.02 | 0.00 | 0.00 | 0.00  |
| 5791 | PTPRE   | 0.04 | 0.00 | 0.00 | -0.10 |
| 5792 | PTPRF   | 0.02 | 0.00 | 0.05 | 0.36  |
| 5793 | PTPRG   | 0.04 | 0.00 | 0.00 | -0.08 |
| 5794 | PTPRH   | 0.02 | 0.00 | 0.05 | -0.04 |
| 5795 | PTPRJ   | 0.04 | 0.00 | 0.00 | 0.25  |
| 5796 | PTPRK   | 0.00 | 0.00 | 0.10 | 0.04  |
| 5797 | PTPRM   | 0.02 | 0.00 | 0.05 | -0.12 |
| 5798 | PTPRN   | 0.04 | 0.00 | 0.00 | -0.01 |
| 5799 | PTPRN2  | 0.20 | 0.14 | 0.10 | 0.00  |
| 5801 | PTPRR   | 0.12 | 0.00 | 0.05 | 0.19  |
| 5802 | PTPRS   | 0.02 | 0.00 | 0.15 | 0.07  |
| 5803 | PTPRZ1  | 0.00 | 0.00 | 0.00 | NaN   |
| 5805 | PTS     | 0.02 | 0.00 | 0.00 | -0.11 |
| 5806 | PTX3    | 0.02 | 0.00 | 0.10 | -0.06 |
| 5810 | RAD1    | 0.02 | 0.14 | 0.05 | 0.15  |
| 5813 | PURA    | 0.00 | 0.00 | 0.00 | NaN   |
| 5816 | PVALB   | 0.00 | 0.14 | 0.00 | 0.17  |
| 5817 | PVR     | 0.00 | 0.00 | 0.00 | NaN   |
| 5818 | PVRL1   | 0.00 | 0.00 | 0.00 | NaN   |
| 5819 | PVRL2   | 0.00 | 0.00 | 0.00 | NaN   |

|      |         |      |      |      |       |
|------|---------|------|------|------|-------|
| 5825 | ABCD3   | 0.00 | 0.00 | 0.00 | NaN   |
| 5826 | ABCD4   | 0.02 | 0.00 | 0.05 | 0.16  |
| 5827 | PXMP2   | 0.08 | 0.14 | 0.05 | -0.06 |
| 5828 | PXMP3   | 0.06 | 0.00 | 0.00 | 0.15  |
| 5829 | PXN     | 0.02 | 0.00 | 0.10 | 0.07  |
| 5831 | PYCR1   | 0.00 | 0.00 | 0.00 | NaN   |
| 5833 | PCYT2   | 0.00 | 0.00 | 0.00 | NaN   |
| 5834 | PYGB    | 0.04 | 0.00 | 0.15 | 0.09  |
| 5836 | PYGL    | 0.02 | 0.00 | 0.00 | 0.30  |
| 5837 | PYGM    | 0.02 | 0.00 | 0.00 | -0.04 |
| 5858 | PZP     | 0.02 | 0.00 | 0.15 | -0.06 |
| 5859 | QARS    | 0.00 | 0.00 | 0.05 | 0.26  |
| 5860 | QDPR    | 0.00 | 0.00 | 0.00 | NaN   |
| 5861 | RAB1A   | 0.00 | 0.00 | 0.00 | NaN   |
| 5864 | RAB3A   | 0.02 | 0.00 | 0.00 | 0.05  |
| 5865 | RAB3B   | 0.02 | 0.00 | 0.00 | 0.08  |
| 5866 | RAB3IL1 | 0.00 | 0.00 | 0.05 | 0.01  |
| 5867 | RAB4A   | 0.00 | 0.00 | 0.05 | 0.06  |
| 5868 | RAB5A   | 0.06 | 0.00 | 0.05 | 0.05  |
| 5869 | RAB5B   | 0.02 | 0.00 | 0.05 | 0.05  |
| 5870 | RAB6A   | 0.02 | 0.00 | 0.00 | 0.32  |
| 5871 | MAP4K2  | 0.02 | 0.00 | 0.00 | 0.13  |
| 5872 | RAB13   | 0.02 | 0.00 | 0.10 | 0.25  |
| 5873 | RAB27A  | 0.00 | 0.00 | 0.00 | NaN   |
| 5874 | RAB27B  | 0.00 | 0.00 | 0.05 | -0.04 |
| 5875 | RABGGTA | 0.02 | 0.14 | 0.10 | 0.00  |
| 5876 | RABGGTB | 0.02 | 0.00 | 0.05 | -0.07 |
| 5877 | RABIF   | 0.02 | 0.00 | 0.00 | -0.12 |
| 5878 | RAB5C   | 0.02 | 0.86 | 0.05 | 0.14  |
| 5879 | RAC1    | 0.02 | 0.00 | 0.00 | -0.05 |
| 5880 | RAC2    | 0.00 | 0.14 | 0.00 | -0.01 |
| 5881 | RAC3    | 0.00 | 0.00 | 0.00 | NaN   |
| 5884 | RAD17   | 0.06 | 0.00 | 0.00 | -0.09 |
| 5885 | RAD21   | 0.08 | 0.14 | 0.00 | 0.10  |
| 5886 | RAD23A  | 0.00 | 0.14 | 0.05 | -0.09 |
| 5887 | RAD23B  | 0.00 | 0.00 | 0.00 | NaN   |
| 5888 | RAD51   | 0.00 | 0.00 | 0.00 | NaN   |
| 5889 | RAD51C  | 0.06 | 0.00 | 0.05 | 0.22  |
| 5890 | RAD51L1 | 0.00 | 0.00 | 0.00 | NaN   |
| 5891 | RAGE    | 0.02 | 0.00 | 0.00 | -0.14 |
| 5892 | RAD51L3 | 0.06 | 0.00 | 0.00 | 0.39  |
| 5893 | RAD52   | 0.08 | 0.14 | 0.10 | 0.20  |
| 5894 | RAF1    | 0.00 | 0.00 | 0.05 | -0.32 |
| 5896 | RAG1    | 0.02 | 0.00 | 0.00 | 0.01  |
| 5897 | RAG2    | 0.02 | 0.00 | 0.00 | 0.05  |
| 5898 | RALA    | 0.00 | 0.00 | 0.00 | NaN   |
| 5899 | RALB    | 0.00 | 0.00 | 0.10 | -0.11 |

|      |          |      |      |      |       |
|------|----------|------|------|------|-------|
| 5900 | RALGDS   | 0.04 | 0.00 | 0.00 | -0.01 |
| 5901 | RAN      | 0.08 | 0.14 | 0.05 | 0.03  |
| 5902 | RANBP1   | 0.06 | 0.14 | 0.15 | 0.14  |
| 5903 | RANBP2   | 0.02 | 0.00 | 0.00 | -0.07 |
| 5905 | RANGAP1  | 0.00 | 0.14 | 0.00 | 0.12  |
| 5906 | RAP1A    | 0.00 | 0.00 | 0.00 | NaN   |
| 5910 | RAP1GDS1 | 0.02 | 0.00 | 0.00 | -0.11 |
| 5911 | RAP2A    | 0.00 | 0.00 | 0.00 | NaN   |
| 5912 | RAP2B    | 0.02 | 0.00 | 0.10 | 0.08  |
| 5913 | RAPSN    | 0.04 | 0.00 | 0.00 | -0.25 |
| 5914 | RARA     | 0.02 | 0.86 | 0.05 | 0.13  |
| 5915 | RARB     | 0.02 | 0.00 | 0.05 | 0.11  |
| 5916 | RARG     | 0.00 | 0.00 | 0.00 | NaN   |
| 5917 | RARS     | 0.00 | 0.00 | 0.00 | NaN   |
| 5918 | RARRES1  | 0.02 | 0.00 | 0.10 | 0.06  |
| 5919 | RARRES2  | 0.06 | 0.00 | 0.15 | -0.03 |
| 5920 | RARRES3  | 0.02 | 0.00 | 0.00 | -0.05 |
| 5921 | RASA1    | 0.00 | 0.00 | 0.00 | NaN   |
| 5922 | RASA2    | 0.02 | 0.00 | 0.00 | 0.05  |
| 5923 | RASGRF1  | 0.02 | 0.00 | 0.00 | 0.00  |
| 5925 | RB1      | 0.00 | 0.00 | 0.00 | NaN   |
| 5928 | RBBP4    | 0.00 | 0.00 | 0.00 | NaN   |
| 5929 | RBBP5    | 0.02 | 0.00 | 0.05 | 0.03  |
| 5930 | RBBP6    | 0.06 | 0.14 | 0.00 | 0.05  |
| 5932 | RBBP8    | 0.00 | 0.14 | 0.00 | -0.13 |
| 5934 | RBL2     | 0.02 | 0.00 | 0.00 | 0.11  |
| 5936 | RBM4     | 0.04 | 0.00 | 0.05 | -0.19 |
| 5937 | RBMS1    | 0.00 | 0.00 | 0.05 | 0.07  |
| 5939 | RBMS2    | 0.00 | 0.00 | 0.00 | NaN   |
| 5947 | RBP1     | 0.00 | 0.00 | 0.05 | 0.11  |
| 5949 | RBP3     | 0.02 | 0.00 | 0.10 | 0.05  |
| 5950 | RBP4     | 0.02 | 0.00 | 0.05 | 0.10  |
| 5954 | RCN1     | 0.00 | 0.00 | 0.00 | NaN   |
| 5955 | RCN2     | 0.00 | 0.00 | 0.05 | 0.06  |
| 5959 | RDH5     | 0.02 | 0.00 | 0.05 | 0.04  |
| 5962 | RDX      | 0.02 | 0.00 | 0.05 | 0.18  |
| 5965 | RECQL    | 0.02 | 0.00 | 0.05 | -0.13 |
| 5966 | REL      | 0.00 | 0.00 | 0.05 | 0.08  |
| 5967 | REG1A    | 0.00 | 0.00 | 0.00 | NaN   |
| 5968 | REG1B    | 0.00 | 0.00 | 0.00 | NaN   |
| 5970 | RELA     | 0.04 | 0.00 | 0.05 | 0.05  |
| 5971 | RELB     | 0.00 | 0.00 | 0.00 | NaN   |
| 5972 | REN      | 0.00 | 0.00 | 0.15 | -0.17 |
| 5978 | REST     | 0.06 | 0.00 | 0.00 | 0.03  |
| 5979 | RET      | 0.02 | 0.00 | 0.05 | 0.06  |
| 5980 | REV3L    | 0.02 | 0.00 | 0.10 | 0.34  |
| 5981 | RFC1     | 0.04 | 0.00 | 0.10 | -0.03 |

|      |         |      |      |      |       |
|------|---------|------|------|------|-------|
| 5982 | RFC2    | 0.00 | 0.00 | 0.00 | NaN   |
| 5983 | RFC3    | 0.02 | 0.00 | 0.00 | 0.08  |
| 5984 | RFC4    | 0.02 | 0.14 | 0.00 | -0.10 |
| 5985 | RFC5    | 0.02 | 0.00 | 0.10 | -0.03 |
| 5986 | RFNG    | 0.00 | 0.00 | 0.00 | NaN   |
| 5988 | RFPL1   | 0.00 | 0.14 | 0.00 | -0.11 |
| 5989 | RFX1    | 0.00 | 0.00 | 0.00 | NaN   |
| 5990 | RFX2    | 0.02 | 0.00 | 0.15 | -0.16 |
| 5991 | RFX3    | 0.02 | 0.00 | 0.00 | -0.14 |
| 5992 | RFX4    | 0.00 | 0.00 | 0.00 | NaN   |
| 5993 | RFX5    | 0.02 | 0.00 | 0.10 | 0.45  |
| 5994 | RFXAP   | 0.02 | 0.00 | 0.00 | -0.09 |
| 5995 | RGR     | 0.06 | 0.14 | 0.05 | -0.08 |
| 5996 | RGS1    | 0.00 | 0.00 | 0.00 | NaN   |
| 5997 | RGS2    | 0.00 | 0.00 | 0.00 | NaN   |
| 5998 | RGS3    | 0.00 | 0.00 | 0.00 | NaN   |
| 5999 | RGS4    | 0.00 | 0.00 | 0.00 | NaN   |
| 6000 | RGS7    | 0.06 | 0.00 | 0.00 | 0.13  |
| 6001 | RGS10   | 0.04 | 0.00 | 0.10 | 0.14  |
| 6002 | RGS12   | 0.00 | 0.00 | 0.00 | NaN   |
| 6003 | RGS13   | 0.00 | 0.00 | 0.00 | NaN   |
| 6004 | RGS16   | 0.02 | 0.00 | 0.00 | -0.02 |
| 6005 | RHAG    | 0.00 | 0.00 | 0.00 | NaN   |
| 6006 | RHCE    | 0.02 | 0.00 | 0.05 | -0.05 |
| 6007 | RHD     | 0.02 | 0.00 | 0.05 | -0.07 |
| 6010 | RHO     | 0.02 | 0.00 | 0.00 | 0.00  |
| 6013 | RLN1    | 0.02 | 0.00 | 0.00 | 0.17  |
| 6015 | RING1   | 0.02 | 0.00 | 0.05 | 0.29  |
| 6017 | RLBP1   | 0.00 | 0.00 | 0.00 | NaN   |
| 6018 | RLF     | 0.02 | 0.00 | 0.05 | -0.05 |
| 6019 | RLN2    | 0.02 | 0.00 | 0.00 | 0.03  |
| 6036 | RNASE2  | 0.02 | 0.00 | 0.00 | -0.06 |
| 6037 | RNASE3  | 0.02 | 0.00 | 0.00 | -0.08 |
| 6038 | RNASE4  | 0.02 | 0.00 | 0.00 | -0.02 |
| 6039 | RNASE6  | 0.02 | 0.00 | 0.00 | -0.02 |
| 6040 | RNASEH1 | 0.20 | 0.14 | 0.35 | 0.07  |
| 6041 | RNASEL  | 0.02 | 0.00 | 0.00 | -0.19 |
| 6045 | RNF2    | 0.00 | 0.00 | 0.05 | -0.02 |
| 6046 | BRD2    | 0.02 | 0.00 | 0.05 | 0.20  |
| 6047 | RNF4    | 0.00 | 0.29 | 0.00 | -0.21 |
| 6048 | RNF5    | 0.02 | 0.00 | 0.05 | 0.05  |
| 6049 | RNF6    | 0.00 | 0.00 | 0.05 | 0.07  |
| 6051 | RNPEP   | 0.02 | 0.00 | 0.00 | -0.11 |
| 6059 | ABCE1   | 0.00 | 0.00 | 0.00 | NaN   |
| 6091 | ROBO1   | 0.16 | 0.14 | 0.30 | -0.07 |
| 6093 | ROCK1   | 0.08 | 0.14 | 0.10 | 0.03  |
| 6094 | ROM1    | 0.00 | 0.00 | 0.05 | 0.06  |

|      |         |      |      |      |       |
|------|---------|------|------|------|-------|
| 6095 | RORA    | 0.00 | 0.00 | 0.00 | NaN   |
| 6096 | RORB    | 0.00 | 0.00 | 0.00 | NaN   |
| 6097 | RORC    | 0.02 | 0.00 | 0.10 | -0.01 |
| 6098 | ROS1    | 0.06 | 0.00 | 0.05 | -0.08 |
| 6117 | RPA1    | 0.04 | 0.00 | 0.05 | 0.08  |
| 6118 | RPA2    | 0.04 | 0.00 | 0.00 | -0.46 |
| 6119 | RPA3    | 0.00 | 0.00 | 0.00 | NaN   |
| 6120 | RPE     | 0.02 | 0.00 | 0.05 | 0.16  |
| 6121 | RPE65   | 0.02 | 0.00 | 0.00 | -0.07 |
| 6122 | RPL3    | 0.00 | 0.14 | 0.05 | 0.03  |
| 6123 | RPL3L   | 0.18 | 0.00 | 0.10 | -0.02 |
| 6124 | RPL4    | 0.04 | 0.00 | 0.00 | 0.04  |
| 6125 | RPL5    | 0.00 | 0.00 | 0.00 | NaN   |
| 6128 | RPL6    | 0.02 | 0.00 | 0.00 | -0.07 |
| 6129 | RPL7    | 0.02 | 0.00 | 0.00 | -0.04 |
| 6130 | RPL7A   | 0.04 | 0.00 | 0.00 | -0.21 |
| 6132 | RPL8    | 0.10 | 0.00 | 0.15 | 0.33  |
| 6133 | RPL9    | 0.04 | 0.00 | 0.10 | -0.26 |
| 6135 | RPL11   | 0.02 | 0.00 | 0.05 | -0.07 |
| 6136 | RPL12   | 0.02 | 0.00 | 0.00 | -0.05 |
| 6137 | RPL13   | 0.00 | 0.00 | 0.10 | 0.04  |
| 6138 | RPL15   | 0.02 | 0.00 | 0.05 | 0.10  |
| 6141 | RPL18   | 0.06 | 0.00 | 0.05 | 0.27  |
| 6142 | RPL18A  | 0.04 | 0.00 | 0.00 | 0.17  |
| 6143 | RPL19   | 0.02 | 0.86 | 0.05 | 0.32  |
| 6144 | RPL21   | 0.00 | 0.00 | 0.05 | 0.08  |
| 6146 | RPL22   | 0.02 | 0.00 | 0.00 | 0.11  |
| 6147 | RPL23A  | 0.10 | 0.00 | 0.05 | 0.09  |
| 6150 | MRPL23  | 0.02 | 0.00 | 0.05 | -0.12 |
| 6152 | RPL24   | 0.00 | 0.00 | 0.00 | NaN   |
| 6155 | RPL27   | 0.00 | 0.86 | 0.00 | 0.14  |
| 6156 | RPL30   | 0.06 | 0.14 | 0.10 | 0.15  |
| 6157 | RPL27A  | 0.00 | 0.00 | 0.00 | NaN   |
| 6158 | RPL28   | 0.02 | 0.00 | 0.05 | 0.26  |
| 6159 | RPL29   | 0.00 | 0.00 | 0.10 | -0.08 |
| 6160 | RPL31   | 0.02 | 0.00 | 0.10 | 0.15  |
| 6161 | RPL32   | 0.00 | 0.00 | 0.05 | 0.10  |
| 6164 | RPL34   | 0.08 | 0.00 | 0.00 | -0.22 |
| 6165 | RPL35A  | 0.20 | 0.14 | 0.10 | 0.21  |
| 6166 | RPL36AL | 0.00 | 0.00 | 0.00 | NaN   |
| 6167 | RPL37   | 0.04 | 0.00 | 0.00 | 0.39  |
| 6168 | RPL37A  | 0.02 | 0.00 | 0.00 | -0.06 |
| 6169 | RPL38   | 0.04 | 0.00 | 0.00 | 0.09  |
| 6171 | RPL41   | 0.00 | 0.00 | 0.00 | NaN   |
| 6175 | RPLP0   | 0.02 | 0.00 | 0.10 | 0.04  |
| 6176 | RPLP1   | 0.00 | 0.00 | 0.00 | NaN   |
| 6181 | RPLP2   | 0.02 | 0.00 | 0.05 | 0.25  |



|      |         |      |      |      |       |
|------|---------|------|------|------|-------|
| 6182 | MRPL12  | 0.00 | 0.00 | 0.00 | NaN   |
| 6183 | MRPS12  | 0.06 | 0.00 | 0.05 | 0.16  |
| 6184 | RPN1    | 0.04 | 0.00 | 0.00 | 0.37  |
| 6185 | RPN2    | 0.04 | 0.00 | 0.00 | 0.14  |
| 6187 | RPS2    | 0.18 | 0.00 | 0.10 | 0.12  |
| 6188 | RPS3    | 0.02 | 0.14 | 0.00 | -0.20 |
| 6189 | RPS3A   | 0.02 | 0.14 | 0.10 | 0.10  |
| 6193 | RPS5    | 0.00 | 0.00 | 0.00 | NaN   |
| 6194 | RPS6    | 0.02 | 0.00 | 0.05 | -0.02 |
| 6195 | RPS6KA1 | 0.02 | 0.00 | 0.05 | -0.06 |
| 6196 | RPS6KA2 | 0.02 | 0.00 | 0.05 | -0.03 |
| 6198 | RPS6KB1 | 0.06 | 0.00 | 0.05 | 0.44  |
| 6199 | RPS6KB2 | 0.02 | 0.00 | 0.00 | 0.36  |
| 6201 | RPS7    | 0.20 | 0.14 | 0.35 | 0.01  |
| 6202 | RPS8    | 0.02 | 0.00 | 0.05 | 0.31  |
| 6203 | RPS9    | 0.02 | 0.00 | 0.05 | -0.01 |
| 6204 | RPS10   | 0.00 | 0.00 | 0.00 | NaN   |
| 6205 | RPS11   | 0.02 | 0.00 | 0.05 | -0.01 |
| 6206 | RPS12   | 0.02 | 0.00 | 0.00 | 0.00  |
| 6207 | RPS13   | 0.00 | 0.00 | 0.10 | 0.08  |
| 6208 | RPS14   | 0.00 | 0.14 | 0.00 | 0.04  |
| 6209 | RPS15   | 0.02 | 0.00 | 0.05 | 0.02  |
| 6210 | RPS15A  | 0.00 | 0.00 | 0.00 | NaN   |
| 6217 | RPS16   | 0.06 | 0.00 | 0.05 | -0.01 |
| 6218 | RPS17   | 0.02 | 0.00 | 0.00 | 0.03  |
| 6222 | RPS18   | 0.02 | 0.00 | 0.05 | 0.06  |
| 6223 | RPS19   | 0.00 | 0.00 | 0.05 | 0.44  |
| 6224 | RPS20   | 0.04 | 0.00 | 0.00 | -0.09 |
| 6227 | RPS21   | 0.08 | 0.00 | 0.05 | 0.31  |
| 6228 | RPS23   | 0.04 | 0.00 | 0.00 | 0.06  |
| 6229 | RPS24   | 0.02 | 0.00 | 0.10 | -0.04 |
| 6230 | RPS25   | 0.00 | 0.00 | 0.05 | 0.00  |
| 6231 | RPS26   | 0.02 | 0.00 | 0.05 | -0.08 |
| 6232 | RPS27   | 0.02 | 0.00 | 0.10 | 0.20  |
| 6233 | RPS27A  | 0.02 | 0.00 | 0.05 | -0.02 |
| 6234 | RPS28   | 0.02 | 0.00 | 0.15 | 0.12  |
| 6235 | RPS29   | 0.00 | 0.00 | 0.00 | NaN   |
| 6236 | RRAD    | 0.02 | 0.00 | 0.00 | 0.05  |
| 6237 | RRAS    | 0.02 | 0.00 | 0.05 | 0.02  |
| 6238 | RRBP1   | 0.00 | 0.00 | 0.00 | NaN   |
| 6239 | RREB1   | 0.02 | 0.00 | 0.05 | 0.12  |
| 6240 | RRM1    | 0.00 | 0.00 | 0.00 | NaN   |
| 6241 | RRM2    | 0.00 | 0.00 | 0.00 | NaN   |
| 6248 | RSC1A1  | 0.02 | 0.00 | 0.00 | -0.04 |
| 6251 | RSU1    | 0.02 | 0.14 | 0.05 | 0.05  |
| 6252 | RTN1    | 0.02 | 0.14 | 0.00 | 0.01  |
| 6253 | RTN2    | 0.00 | 0.00 | 0.00 | NaN   |

|      |          |      |      |      |       |
|------|----------|------|------|------|-------|
| 6256 | RXRA     | 0.04 | 0.00 | 0.00 | -0.13 |
| 6257 | RXRB     | 0.02 | 0.00 | 0.05 | 0.07  |
| 6258 | RXRG     | 0.02 | 0.00 | 0.00 | -0.06 |
| 6259 | RYK      | 0.00 | 0.00 | 0.10 | 0.25  |
| 6261 | RYR1     | 0.00 | 0.00 | 0.00 | NaN   |
| 6262 | RYR2     | 0.00 | 0.00 | 0.00 | NaN   |
| 6263 | RYR3     | 0.04 | 0.00 | 0.05 | -0.05 |
| 6271 | S100A1   | 0.02 | 0.00 | 0.10 | 0.11  |
| 6272 | SORT1    | 0.00 | 0.00 | 0.00 | NaN   |
| 6273 | S100A2   | 0.02 | 0.00 | 0.10 | -0.13 |
| 6274 | S100A3   | 0.02 | 0.00 | 0.10 | -0.03 |
| 6275 | S100A4   | 0.02 | 0.00 | 0.10 | 0.16  |
| 6276 | S100A5   | 0.02 | 0.00 | 0.10 | 0.15  |
| 6277 | S100A6   | 0.02 | 0.00 | 0.10 | 0.11  |
| 6278 | S100A7   | 0.02 | 0.00 | 0.10 | 0.18  |
| 6279 | S100A8   | 0.02 | 0.00 | 0.10 | 0.16  |
| 6280 | S100A9   | 0.02 | 0.00 | 0.10 | 0.17  |
| 6281 | S100A10  | 0.02 | 0.00 | 0.10 | -0.02 |
| 6282 | S100A11  | 0.02 | 0.00 | 0.10 | 0.02  |
| 6283 | S100A12  | 0.02 | 0.00 | 0.10 | 0.46  |
| 6284 | S100A13  | 0.02 | 0.00 | 0.10 | -0.13 |
| 6285 | S100B    | 0.04 | 0.00 | 0.05 | -0.09 |
| 6286 | S100P    | 0.00 | 0.00 | 0.00 | NaN   |
| 6289 | SAA2     | 0.00 | 0.00 | 0.05 | 0.00  |
| 6291 | SAA4     | 0.00 | 0.00 | 0.05 | 0.00  |
| 6294 | SAFB     | 0.02 | 0.00 | 0.15 | 0.13  |
| 6295 | SAG      | 0.02 | 0.00 | 0.00 | -0.08 |
| 6297 | SALL2    | 0.02 | 0.00 | 0.00 | -0.15 |
| 6299 | SALL1    | 0.02 | 0.00 | 0.00 | -0.03 |
| 6301 | SARS     | 0.06 | 0.00 | 0.20 | 0.21  |
| 6304 | SATB1    | 0.06 | 0.00 | 0.05 | -0.04 |
| 6307 | SC4MOL   | 0.02 | 0.00 | 0.00 | 0.03  |
| 6309 | SC5DL    | 0.00 | 0.00 | 0.00 | NaN   |
| 6317 | SERPINB3 | 0.02 | 0.00 | 0.00 | -0.02 |
| 6318 | SERPINB4 | 0.02 | 0.00 | 0.00 | -0.03 |
| 6319 | SCD      | 0.00 | 0.00 | 0.05 | -0.07 |
| 6323 | SCN1A    | 0.02 | 0.00 | 0.00 | -0.04 |
| 6324 | SCN1B    | 0.00 | 0.00 | 0.00 | NaN   |
| 6327 | SCN2B    | 0.00 | 0.00 | 0.00 | NaN   |
| 6328 | SCN3A    | 0.02 | 0.00 | 0.00 | -0.09 |
| 6329 | SCN4A    | 0.12 | 0.00 | 0.20 | 0.01  |
| 6331 | SCN5A    | 0.02 | 0.00 | 0.05 | 0.06  |
| 6334 | SCN8A    | 0.00 | 0.00 | 0.00 | NaN   |
| 6335 | SCN9A    | 0.02 | 0.00 | 0.00 | 0.08  |
| 6336 | SCN10A   | 0.02 | 0.00 | 0.05 | -0.02 |
| 6337 | SCNN1A   | 0.02 | 0.00 | 0.15 | -0.14 |
| 6338 | SCNN1B   | 0.02 | 0.14 | 0.00 | 0.01  |

|      |         |      |      |      |       |
|------|---------|------|------|------|-------|
| 6340 | SCNN1G  | 0.02 | 0.14 | 0.00 | -0.06 |
| 6342 | SCP2    | 0.02 | 0.00 | 0.00 | 0.19  |
| 6343 | SCT     | 0.02 | 0.00 | 0.05 | 0.37  |
| 6344 | SCTR    | 0.00 | 0.00 | 0.10 | -0.06 |
| 6382 | SDC1    | 0.00 | 0.00 | 0.00 | NaN   |
| 6383 | SDC2    | 0.08 | 0.00 | 0.05 | 0.05  |
| 6385 | SDC4    | 0.04 | 0.00 | 0.05 | 0.23  |
| 6386 | SDCBP   | 0.04 | 0.00 | 0.00 | -0.10 |
| 6388 | SDF2    | 0.10 | 0.00 | 0.05 | 0.15  |
| 6389 | SDHA    | 0.00 | 0.00 | 0.00 | NaN   |
| 6390 | SDHB    | 0.02 | 0.00 | 0.00 | -0.10 |
| 6391 | SDHC    | 0.00 | 0.00 | 0.00 | NaN   |
| 6392 | SDHD    | 0.02 | 0.00 | 0.00 | -0.13 |
| 6397 | SEC14L1 | 0.00 | 0.14 | 0.05 | 0.07  |
| 6398 | SECTM1  | 0.00 | 0.00 | 0.00 | NaN   |
| 6400 | SEL1L   | 0.02 | 0.00 | 0.00 | 0.02  |
| 6401 | SELE    | 0.02 | 0.00 | 0.00 | 0.00  |
| 6402 | SELL    | 0.02 | 0.00 | 0.00 | -0.06 |
| 6403 | SELP    | 0.02 | 0.00 | 0.00 | 0.00  |
| 6404 | SELPLG  | 0.02 | 0.00 | 0.00 | -0.09 |
| 6405 | SEMA3F  | 0.00 | 0.00 | 0.05 | -0.08 |
| 6406 | SEMG1   | 0.04 | 0.00 | 0.00 | -0.12 |
| 6414 | SEPP1   | 0.18 | 0.00 | 0.30 | 0.10  |
| 6415 | SEPW1   | 0.00 | 0.00 | 0.00 | NaN   |
| 6416 | MAP2K4  | 0.04 | 0.00 | 0.00 | 0.07  |
| 6418 | SET     | 0.00 | 0.00 | 0.00 | NaN   |
| 6419 | SETMAR  | 0.00 | 0.00 | 0.05 | 0.04  |
| 6421 | SFPQ    | 0.00 | 0.00 | 0.00 | NaN   |
| 6422 | SFRP1   | 0.10 | 0.29 | 0.00 | -0.16 |
| 6424 | SFRP4   | 0.00 | 0.00 | 0.00 | NaN   |
| 6425 | SFRP5   | 0.00 | 0.14 | 0.00 | -0.02 |
| 6426 | SFRS1   | 0.04 | 0.00 | 0.05 | 0.27  |
| 6427 | SFRS2   | 0.00 | 0.14 | 0.05 | 0.04  |
| 6428 | SFRS3   | 0.00 | 0.00 | 0.00 | NaN   |
| 6429 | SFRS4   | 0.04 | 0.00 | 0.00 | -0.18 |
| 6430 | SFRS5   | 0.02 | 0.00 | 0.05 | 0.17  |
| 6431 | SFRS6   | 0.02 | 0.00 | 0.00 | 0.08  |
| 6432 | SFRS7   | 0.02 | 0.00 | 0.05 | 0.48  |
| 6433 | SFRS8   | 0.08 | 0.14 | 0.05 | -0.05 |
| 6436 | SFTPA2  | 0.02 | 0.00 | 0.10 | -0.02 |
| 6439 | SFTPB   | 0.00 | 0.00 | 0.00 | NaN   |
| 6440 | SFTPC   | 0.00 | 0.00 | 0.05 | 0.21  |
| 6441 | SFTPD   | 0.02 | 0.00 | 0.10 | 0.25  |
| 6442 | SGCA    | 0.06 | 0.00 | 0.00 | 0.10  |
| 6443 | SGCB    | 0.02 | 0.00 | 0.05 | 0.23  |
| 6444 | SGCD    | 0.00 | 0.00 | 0.00 | NaN   |
| 6445 | SGCG    | 0.02 | 0.00 | 0.00 | -0.02 |

|      |        |      |      |      |       |
|------|--------|------|------|------|-------|
| 6448 | SGSH   | 0.00 | 0.14 | 0.00 | 0.10  |
| 6450 | SH3BGR | 0.00 | 0.00 | 0.00 | NaN   |
| 6452 | SH3BP2 | 0.00 | 0.29 | 0.00 | 0.00  |
| 6453 | ITSN1  | 0.00 | 0.00 | 0.00 | NaN   |
| 6455 | SH3GL1 | 0.02 | 0.00 | 0.15 | -0.13 |
| 6456 | SH3GL2 | 0.02 | 0.00 | 0.05 | -0.02 |
| 6457 | SH3GL3 | 0.00 | 0.00 | 0.00 | NaN   |
| 6461 | SHB    | 0.02 | 0.00 | 0.00 | -0.09 |
| 6462 | SHBG   | 0.00 | 0.00 | 0.00 | NaN   |
| 6464 | SHC1   | 0.04 | 0.00 | 0.15 | 0.09  |
| 6469 | SHH    | 0.00 | 0.00 | 0.05 | -0.23 |
| 6470 | SHMT1  | 0.02 | 0.00 | 0.00 | -0.06 |
| 6472 | SHMT2  | 0.00 | 0.00 | 0.00 | NaN   |
| 6474 | SHOX2  | 0.02 | 0.00 | 0.10 | 0.07  |
| 6476 | SI     | 0.00 | 0.00 | 0.00 | NaN   |
| 6477 | SIAH1  | 0.43 | 0.29 | 0.15 | -0.19 |
| 6478 | SIAH2  | 0.02 | 0.00 | 0.05 | -0.22 |
| 6490 | SILV   | 0.02 | 0.00 | 0.05 | 0.03  |
| 6493 | SIM2   | 0.00 | 0.00 | 0.00 | NaN   |
| 6494 | SIPA1  | 0.04 | 0.00 | 0.05 | 0.07  |
| 6495 | SIX1   | 0.00 | 0.14 | 0.00 | -0.12 |
| 6496 | SIX3   | 0.02 | 0.00 | 0.05 | -0.04 |
| 6498 | SKIL   | 0.00 | 0.00 | 0.00 | NaN   |
| 6499 | SKIV2L | 0.02 | 0.00 | 0.05 | 0.31  |
| 6502 | SKP2   | 0.04 | 0.00 | 0.15 | 0.06  |
| 6503 | SLA    | 0.06 | 0.00 | 0.00 | 0.12  |
| 6505 | SLC1A1 | 0.00 | 0.00 | 0.00 | NaN   |
| 6506 | SLC1A2 | 0.02 | 0.00 | 0.00 | 0.00  |
| 6507 | SLC1A3 | 0.04 | 0.00 | 0.15 | 0.26  |
| 6508 | SLC4A3 | 0.04 | 0.00 | 0.00 | 0.01  |
| 6509 | SLC1A4 | 0.00 | 0.00 | 0.00 | NaN   |
| 6510 | SLC1A5 | 0.00 | 0.00 | 0.05 | 0.18  |
| 6511 | SLC1A6 | 0.04 | 0.00 | 0.00 | 0.05  |
| 6512 | SLC1A7 | 0.02 | 0.00 | 0.00 | -0.12 |
| 6513 | SLC2A1 | 0.02 | 0.00 | 0.05 | 0.35  |
| 6514 | SLC2A2 | 0.02 | 0.00 | 0.00 | 0.08  |
| 6515 | SLC2A3 | 0.02 | 0.00 | 0.15 | 0.17  |
| 6517 | SLC2A4 | 0.00 | 0.00 | 0.00 | NaN   |
| 6518 | SLC2A5 | 0.00 | 0.00 | 0.00 | NaN   |
| 6519 | SLC3A1 | 0.02 | 0.00 | 0.05 | 0.01  |
| 6520 | SLC3A2 | 0.00 | 0.00 | 0.00 | NaN   |
| 6521 | SLC4A1 | 0.00 | 0.00 | 0.00 | NaN   |
| 6522 | SLC4A2 | 0.02 | 0.00 | 0.00 | -0.12 |
| 6523 | SLC5A1 | 0.00 | 0.29 | 0.05 | 0.02  |
| 6524 | SLC5A2 | 0.02 | 0.00 | 0.00 | 0.00  |
| 6525 | SMTN   | 0.00 | 0.29 | 0.05 | 0.37  |
| 6527 | SLC5A4 | 0.00 | 0.29 | 0.05 | -0.01 |

|      |         |      |      |      |       |
|------|---------|------|------|------|-------|
| 6528 | SLC5A5  | 0.04 | 0.00 | 0.00 | 0.02  |
| 6529 | SLC6A1  | 0.02 | 0.00 | 0.05 | 0.05  |
| 6530 | SLC6A2  | 0.02 | 0.00 | 0.00 | -0.03 |
| 6531 | SLC6A3  | 0.00 | 0.00 | 0.00 | NaN   |
| 6532 | SLC6A4  | 0.10 | 0.00 | 0.05 | -0.18 |
| 6533 | SLC6A6  | 0.00 | 0.00 | 0.05 | 0.03  |
| 6534 | SLC6A7  | 0.00 | 0.00 | 0.00 | NaN   |
| 6536 | SLC6A9  | 0.02 | 0.00 | 0.05 | -0.11 |
| 6538 | SLC6A11 | 0.02 | 0.00 | 0.05 | 0.04  |
| 6540 | SLC6A13 | 0.08 | 0.14 | 0.10 | 0.02  |
| 6541 | SLC7A1  | 0.00 | 0.00 | 0.05 | 0.13  |
| 6542 | SLC7A2  | 0.00 | 0.00 | 0.00 | NaN   |
| 6543 | SLC8A2  | 0.00 | 0.00 | 0.05 | -0.06 |
| 6545 | SLC7A4  | 0.06 | 0.14 | 0.15 | -0.15 |
| 6546 | SLC8A1  | 0.02 | 0.00 | 0.05 | 0.14  |
| 6548 | SLC9A1  | 0.06 | 0.00 | 0.05 | -0.10 |
| 6549 | SLC9A2  | 0.02 | 0.00 | 0.10 | 0.03  |
| 6550 | SLC9A3  | 0.00 | 0.00 | 0.00 | NaN   |
| 6553 | SLC9A5  | 0.02 | 0.00 | 0.00 | 0.08  |
| 6554 | SLC10A1 | 0.02 | 0.00 | 0.05 | 0.06  |
| 6555 | SLC10A2 | 0.02 | 0.00 | 0.00 | -0.03 |
| 6556 | SLC11A1 | 0.04 | 0.00 | 0.00 | 0.01  |
| 6557 | SLC12A1 | 0.02 | 0.00 | 0.05 | -0.10 |
| 6558 | SLC12A2 | 0.00 | 0.00 | 0.00 | NaN   |
| 6559 | SLC12A3 | 0.00 | 0.14 | 0.00 | 0.09  |
| 6560 | SLC12A4 | 0.02 | 0.00 | 0.00 | 0.15  |
| 6561 | SLC13A1 | 0.00 | 0.00 | 0.00 | NaN   |
| 6563 | SLC14A1 | 0.02 | 0.00 | 0.00 | -0.09 |
| 6564 | SLC15A1 | 0.00 | 0.00 | 0.05 | 0.03  |
| 6565 | SLC15A2 | 0.00 | 0.00 | 0.10 | 0.25  |
| 6566 | SLC16A1 | 0.02 | 0.00 | 0.05 | -0.06 |
| 6568 | SLC17A1 | 0.02 | 0.00 | 0.05 | -0.07 |
| 6569 | SLC34A1 | 0.00 | 0.29 | 0.00 | -0.18 |
| 6570 | SLC18A1 | 0.00 | 0.00 | 0.00 | NaN   |
| 6571 | SLC18A2 | 0.04 | 0.14 | 0.05 | -0.04 |
| 6572 | SLC18A3 | 0.02 | 0.00 | 0.05 | 0.02  |
| 6573 | SLC19A1 | 0.00 | 0.00 | 0.05 | 0.02  |
| 6574 | SLC20A1 | 0.00 | 0.00 | 0.00 | NaN   |
| 6575 | SLC20A2 | 0.04 | 0.14 | 0.05 | 0.34  |
| 6576 | SLC25A1 | 0.02 | 0.14 | 0.20 | 0.25  |
| 6580 | SLC22A1 | 0.02 | 0.00 | 0.05 | 0.18  |
| 6581 | SLC22A3 | 0.02 | 0.00 | 0.05 | -0.15 |
| 6582 | SLC22A2 | 0.02 | 0.00 | 0.05 | -0.03 |
| 6583 | SLC22A4 | 0.02 | 0.00 | 0.00 | -0.02 |
| 6584 | SLC22A5 | 0.02 | 0.00 | 0.00 | -0.03 |
| 6585 | SLIT1   | 0.00 | 0.00 | 0.00 | NaN   |
| 6586 | SLIT3   | 0.00 | 0.00 | 0.00 | NaN   |

|      |         |      |      |      |       |
|------|---------|------|------|------|-------|
| 6588 | SLN     | 0.04 | 0.00 | 0.00 | -0.07 |
| 6590 | SLPI    | 0.04 | 0.00 | 0.05 | 0.04  |
| 6591 | SNAI2   | 0.02 | 0.00 | 0.00 | -0.02 |
| 6595 | SMARCA2 | 0.04 | 0.00 | 0.10 | 0.19  |
| 6597 | SMARCA4 | 0.02 | 0.00 | 0.15 | 0.28  |
| 6598 | SMARCB1 | 0.00 | 0.14 | 0.05 | -0.09 |
| 6599 | SMARCC1 | 0.02 | 0.14 | 0.15 | 0.35  |
| 6601 | SMARCC2 | 0.00 | 0.00 | 0.00 | NaN   |
| 6602 | SMARCD1 | 0.02 | 0.00 | 0.00 | 0.00  |
| 6604 | SMARCD3 | 0.02 | 0.00 | 0.00 | -0.13 |
| 6605 | SMARCE1 | 0.02 | 0.86 | 0.05 | 0.16  |
| 6606 | SMN1    | 0.06 | 0.00 | 0.00 | 0.08  |
| 6609 | SMPD1   | 0.00 | 0.00 | 0.00 | NaN   |
| 6610 | SMPD2   | 0.02 | 0.00 | 0.10 | 0.23  |
| 6615 | SNAI1   | 0.06 | 0.00 | 0.05 | 0.09  |
| 6616 | SNAP25  | 0.00 | 0.00 | 0.05 | 0.13  |
| 6617 | SNAPC1  | 0.00 | 0.14 | 0.00 | 0.43  |
| 6618 | SNAPC2  | 0.02 | 0.00 | 0.15 | 0.04  |
| 6619 | SNAPC3  | 0.04 | 0.00 | 0.05 | 0.39  |
| 6620 | SNCB    | 0.00 | 0.00 | 0.00 | NaN   |
| 6622 | SNCA    | 0.00 | 0.00 | 0.00 | NaN   |
| 6623 | SNCG    | 0.00 | 0.00 | 0.05 | -0.08 |
| 6626 | SNRPA   | 0.00 | 0.00 | 0.05 | 0.43  |
| 6627 | SNRPA1  | 0.16 | 0.00 | 0.10 | -0.07 |
| 6628 | SNRPB   | 0.00 | 0.00 | 0.00 | NaN   |
| 6629 | SNRPB2  | 0.00 | 0.00 | 0.10 | -0.11 |
| 6631 | SNRPC   | 0.00 | 0.00 | 0.00 | NaN   |
| 6632 | SNRPD1  | 0.00 | 0.14 | 0.00 | 0.05  |
| 6633 | SNRPD2  | 0.00 | 0.00 | 0.05 | 0.29  |
| 6634 | SNRPD3  | 0.00 | 0.14 | 0.05 | 0.08  |
| 6635 | SNRPE   | 0.00 | 0.00 | 0.15 | 0.11  |
| 6636 | SNRPF   | 0.02 | 0.00 | 0.00 | 0.24  |
| 6637 | SNRPG   | 0.00 | 0.14 | 0.00 | -0.02 |
| 6638 | SNRPN   | 0.00 | 0.14 | 0.00 | 0.10  |
| 6640 | SNTA1   | 0.00 | 0.00 | 0.00 | NaN   |
| 6641 | SNTB1   | 0.10 | 0.00 | 0.15 | 0.27  |
| 6642 | SNX1    | 0.02 | 0.00 | 0.00 | -0.15 |
| 6643 | SNX2    | 0.00 | 0.00 | 0.00 | NaN   |
| 6645 | SNTB2   | 0.00 | 0.00 | 0.00 | NaN   |
| 6646 | SOAT1   | 0.04 | 0.00 | 0.10 | 0.01  |
| 6647 | SOD1    | 0.00 | 0.00 | 0.00 | NaN   |
| 6648 | SOD2    | 0.04 | 0.00 | 0.05 | 0.02  |
| 6649 | SOD3    | 0.00 | 0.00 | 0.00 | NaN   |
| 6650 | SOLH    | 0.18 | 0.00 | 0.10 | -0.11 |
| 6651 | SON     | 0.00 | 0.00 | 0.00 | NaN   |
| 6652 | SORD    | 0.02 | 0.00 | 0.05 | -0.05 |
| 6653 | SORL1   | 0.00 | 0.00 | 0.00 | NaN   |

|      |        |      |      |      |       |
|------|--------|------|------|------|-------|
| 6654 | SOS1   | 0.02 | 0.00 | 0.05 | 0.16  |
| 6655 | SOS2   | 0.00 | 0.00 | 0.00 | NaN   |
| 6656 | SOX1   | 0.06 | 0.00 | 0.00 | -0.02 |
| 6657 | SOX2   | 0.00 | 0.00 | 0.10 | -0.03 |
| 6659 | SOX4   | 0.00 | 0.00 | 0.00 | NaN   |
| 6660 | SOX5   | 0.06 | 0.00 | 0.00 | 0.00  |
| 6662 | SOX9   | 0.02 | 0.00 | 0.05 | 0.17  |
| 6663 | SOX10  | 0.00 | 0.14 | 0.00 | -0.08 |
| 6664 | SOX11  | 0.20 | 0.14 | 0.35 | -0.04 |
| 6667 | SP1    | 0.00 | 0.00 | 0.00 | NaN   |
| 6668 | SP2    | 0.04 | 0.00 | 0.05 | 0.13  |
| 6670 | SP3    | 0.00 | 0.00 | 0.00 | NaN   |
| 6671 | SP4    | 0.00 | 0.00 | 0.00 | NaN   |
| 6672 | SP100  | 0.02 | 0.00 | 0.15 | 0.09  |
| 6674 | SPAG1  | 0.12 | 0.00 | 0.25 | 0.14  |
| 6675 | UAP1   | 0.00 | 0.00 | 0.00 | NaN   |
| 6676 | SPAG4  | 0.06 | 0.14 | 0.05 | 0.30  |
| 6677 | SPAM1  | 0.00 | 0.00 | 0.00 | NaN   |
| 6678 | SPARC  | 0.00 | 0.14 | 0.00 | 0.23  |
| 6687 | SPG7   | 0.00 | 0.00 | 0.10 | 0.10  |
| 6688 | SPI1   | 0.04 | 0.00 | 0.00 | -0.04 |
| 6689 | SPIB   | 0.00 | 0.00 | 0.00 | NaN   |
| 6690 | SPINK1 | 0.00 | 0.00 | 0.00 | NaN   |
| 6691 | SPINK2 | 0.06 | 0.00 | 0.00 | -0.25 |
| 6692 | SPINT1 | 0.00 | 0.00 | 0.00 | NaN   |
| 6693 | SPN    | 0.06 | 0.14 | 0.00 | 0.00  |
| 6694 | SPP2   | 0.02 | 0.00 | 0.00 | 0.26  |
| 6696 | SPP1   | 0.02 | 0.00 | 0.00 | 0.10  |
| 6697 | SPR    | 0.00 | 0.00 | 0.05 | -0.09 |
| 6698 | SPRR1A | 0.02 | 0.00 | 0.10 | -0.04 |
| 6699 | SPRR1B | 0.02 | 0.00 | 0.10 | -0.01 |
| 6701 | SPRR2B | 0.02 | 0.00 | 0.10 | -0.08 |
| 6702 | SPRR2C | 0.02 | 0.00 | 0.10 | 0.12  |
| 6707 | SPRR3  | 0.02 | 0.00 | 0.10 | -0.09 |
| 6708 | SPTA1  | 0.00 | 0.00 | 0.00 | NaN   |
| 6709 | SPTAN1 | 0.00 | 0.00 | 0.00 | NaN   |
| 6710 | SPTB   | 0.06 | 0.00 | 0.00 | 0.01  |
| 6711 | SPTBN1 | 0.02 | 0.00 | 0.05 | 0.20  |
| 6712 | SPTBN2 | 0.04 | 0.00 | 0.05 | 0.22  |
| 6713 | SQLE   | 0.10 | 0.00 | 0.05 | 0.44  |
| 6714 | SRC    | 0.04 | 0.00 | 0.00 | 0.14  |
| 6715 | SRD5A1 | 0.00 | 0.00 | 0.00 | NaN   |
| 6716 | SRD5A2 | 0.00 | 0.00 | 0.00 | NaN   |
| 6717 | SRI    | 0.00 | 0.00 | 0.00 | NaN   |
| 6718 | AKR1D1 | 0.00 | 0.00 | 0.00 | NaN   |
| 6720 | SREBF1 | 0.02 | 0.00 | 0.00 | 0.08  |
| 6721 | SREBF2 | 0.00 | 0.14 | 0.05 | -0.05 |

|      |         |      |      |      |       |
|------|---------|------|------|------|-------|
| 6722 | SRF     | 0.00 | 0.00 | 0.00 | NaN   |
| 6723 | SRM     | 0.02 | 0.00 | 0.00 | 0.06  |
| 6726 | SRP9    | 0.00 | 0.00 | 0.05 | 0.09  |
| 6727 | SRP14   | 0.00 | 0.00 | 0.00 | NaN   |
| 6728 | SRP19   | 0.00 | 0.00 | 0.00 | NaN   |
| 6729 | SRP54   | 0.04 | 0.00 | 0.00 | 0.06  |
| 6731 | SRP72   | 0.04 | 0.00 | 0.00 | 0.07  |
| 6732 | SRPK1   | 0.04 | 0.00 | 0.00 | 0.05  |
| 6733 | SRPK2   | 0.00 | 0.00 | 0.10 | -0.28 |
| 6734 | SRPR    | 0.00 | 0.00 | 0.00 | NaN   |
| 6741 | SSB     | 0.00 | 0.00 | 0.00 | NaN   |
| 6742 | SSBP1   | 0.00 | 0.14 | 0.05 | -0.03 |
| 6744 | SSFA2   | 0.00 | 0.00 | 0.00 | NaN   |
| 6745 | SSR1    | 0.02 | 0.00 | 0.05 | 0.06  |
| 6746 | SSR2    | 0.04 | 0.14 | 0.05 | -0.13 |
| 6747 | SSR3    | 0.02 | 0.00 | 0.10 | -0.08 |
| 6749 | SSRP1   | 0.00 | 0.00 | 0.00 | NaN   |
| 6750 | SST     | 0.00 | 0.14 | 0.00 | 0.06  |
| 6751 | SSTR1   | 0.04 | 0.00 | 0.00 | -0.02 |
| 6752 | SSTR2   | 0.02 | 0.00 | 0.05 | 0.03  |
| 6753 | SSTR3   | 0.00 | 0.14 | 0.00 | 0.12  |
| 6754 | SSTR4   | 0.02 | 0.00 | 0.00 | -0.05 |
| 6755 | SSTR5   | 0.18 | 0.00 | 0.10 | -0.17 |
| 6760 | SS18    | 0.00 | 0.00 | 0.10 | 0.42  |
| 6764 | ST5     | 0.00 | 0.00 | 0.00 | NaN   |
| 6767 | ST13    | 0.00 | 0.14 | 0.00 | 0.01  |
| 6768 | ST14    | 0.02 | 0.00 | 0.00 | -0.03 |
| 6769 | STAC    | 0.02 | 0.14 | 0.10 | 0.08  |
| 6770 | STAR    | 0.12 | 0.14 | 0.05 | -0.16 |
| 6772 | STAT1   | 0.00 | 0.00 | 0.05 | -0.10 |
| 6773 | STAT2   | 0.00 | 0.00 | 0.00 | NaN   |
| 6774 | STAT3   | 0.02 | 0.86 | 0.05 | 0.06  |
| 6775 | STAT4   | 0.00 | 0.00 | 0.05 | -0.13 |
| 6776 | STAT5A  | 0.02 | 0.86 | 0.05 | -0.06 |
| 6777 | STAT5B  | 0.02 | 0.86 | 0.05 | 0.01  |
| 6778 | STAT6   | 0.00 | 0.00 | 0.00 | NaN   |
| 6779 | STATH   | 0.00 | 0.14 | 0.00 | 0.02  |
| 6781 | STC1    | 0.00 | 0.00 | 0.00 | NaN   |
| 6785 | ELOVL4  | 0.10 | 0.00 | 0.20 | -0.03 |
| 6786 | STIM1   | 0.00 | 0.00 | 0.00 | NaN   |
| 6787 | NEK4    | 0.00 | 0.00 | 0.10 | 0.08  |
| 6788 | STK3    | 0.06 | 0.14 | 0.05 | 0.32  |
| 6789 | STK4    | 0.02 | 0.00 | 0.00 | 0.43  |
| 6793 | STK10   | 0.00 | 0.00 | 0.10 | 0.05  |
| 6794 | STK11   | 0.02 | 0.00 | 0.05 | 0.08  |
| 6799 | SULT1A2 | 0.06 | 0.14 | 0.00 | 0.23  |
| 6801 | STRN    | 0.00 | 0.00 | 0.00 | NaN   |



|      |         |      |      |      |       |
|------|---------|------|------|------|-------|
| 6804 | STX1A   | 0.00 | 0.00 | 0.00 | NaN   |
| 6812 | STXBP1  | 0.02 | 0.00 | 0.00 | 0.06  |
| 6813 | STXBP2  | 0.02 | 0.00 | 0.15 | -0.08 |
| 6814 | STXBP3  | 0.06 | 0.00 | 0.20 | 0.11  |
| 6817 | SULT1A1 | 0.06 | 0.14 | 0.00 | 0.18  |
| 6818 | SULT1A3 | 0.00 | 0.00 | 0.00 | NaN   |
| 6820 | SULT2B1 | 0.02 | 0.00 | 0.00 | 0.27  |
| 6821 | SUOX    | 0.02 | 0.00 | 0.05 | -0.18 |
| 6822 | SULT2A1 | 0.00 | 0.00 | 0.00 | NaN   |
| 6827 | SUPT4H1 | 0.04 | 0.00 | 0.05 | 0.17  |
| 6829 | SUPT5H  | 0.06 | 0.00 | 0.05 | 0.09  |
| 6830 | SUPT6H  | 0.10 | 0.00 | 0.05 | 0.18  |
| 6832 | SUPV3L1 | 0.00 | 0.00 | 0.00 | NaN   |
| 6833 | ABCC8   | 0.00 | 0.00 | 0.00 | NaN   |
| 6834 | SURF1   | 0.04 | 0.00 | 0.00 | -0.08 |
| 6835 | SURF2   | 0.04 | 0.00 | 0.00 | -0.20 |
| 6840 | SVIL    | 0.00 | 0.00 | 0.00 | NaN   |
| 6843 | VAMP1   | 0.02 | 0.00 | 0.15 | 0.07  |
| 6844 | VAMP2   | 0.00 | 0.00 | 0.00 | NaN   |
| 6847 | SYCP1   | 0.08 | 0.00 | 0.10 | -0.06 |
| 6850 | SYK     | 0.00 | 0.00 | 0.00 | NaN   |
| 6854 | SYN2    | 0.00 | 0.00 | 0.05 | 0.15  |
| 6857 | SYT1    | 0.00 | 0.00 | 0.00 | NaN   |
| 6861 | SYT5    | 0.02 | 0.00 | 0.05 | 0.12  |
| 6862 | T       | 0.02 | 0.00 | 0.05 | -0.06 |
| 6863 | TAC1    | 0.00 | 0.14 | 0.05 | -0.04 |
| 6865 | TACR2   | 0.00 | 0.00 | 0.00 | NaN   |
| 6866 | TAC3    | 0.00 | 0.00 | 0.00 | NaN   |
| 6867 | TACC1   | 0.12 | 0.14 | 0.15 | 0.41  |
| 6868 | ADAM17  | 0.00 | 0.00 | 0.00 | NaN   |
| 6869 | TACR1   | 0.00 | 0.00 | 0.05 | -0.07 |
| 6870 | TACR3   | 0.08 | 0.00 | 0.00 | -0.04 |
| 6871 | TADA2L  | 0.06 | 0.00 | 0.00 | 0.04  |
| 6874 | TAF4    | 0.08 | 0.00 | 0.05 | 0.25  |
| 6875 | TAF4B   | 0.00 | 0.00 | 0.10 | 0.43  |
| 6876 | TAGLN   | 0.02 | 0.00 | 0.00 | 0.05  |
| 6877 | TAF5    | 0.02 | 0.00 | 0.00 | -0.11 |
| 6878 | TAF6    | 0.02 | 0.00 | 0.00 | 0.18  |
| 6879 | TAF7    | 0.00 | 0.00 | 0.00 | NaN   |
| 6880 | TAF9    | 0.06 | 0.00 | 0.00 | -0.39 |
| 6881 | TAF10   | 0.00 | 0.00 | 0.00 | NaN   |
| 6883 | TAF12   | 0.04 | 0.00 | 0.00 | -0.26 |
| 6884 | TAF13   | 0.06 | 0.00 | 0.20 | -0.17 |
| 6885 | MAP3K7  | 0.08 | 0.00 | 0.00 | -0.05 |
| 6886 | TAL1    | 0.02 | 0.00 | 0.05 | -0.07 |
| 6888 | TALDO1  | 0.02 | 0.00 | 0.05 | 0.04  |
| 6890 | TAP1    | 0.02 | 0.00 | 0.05 | 0.00  |

|      |         |      |      |      |       |
|------|---------|------|------|------|-------|
| 6891 | TAP2    | 0.02 | 0.00 | 0.05 | -0.05 |
| 6894 | TARBP1  | 0.00 | 0.00 | 0.00 | NaN   |
| 6895 | TARBP2  | 0.00 | 0.00 | 0.00 | NaN   |
| 6897 | TARS    | 0.00 | 0.00 | 0.10 | 0.37  |
| 6898 | TAT     | 0.00 | 0.00 | 0.05 | -0.02 |
| 6899 | TBX1    | 0.06 | 0.14 | 0.15 | 0.09  |
| 6900 | CNTN2   | 0.02 | 0.00 | 0.05 | -0.11 |
| 6902 | TBCA    | 0.00 | 0.00 | 0.00 | NaN   |
| 6903 | TBCC    | 0.06 | 0.00 | 0.05 | 0.06  |
| 6904 | TBCD    | 0.00 | 0.00 | 0.00 | NaN   |
| 6905 | TBCE    | 0.02 | 0.00 | 0.00 | 0.06  |
| 6908 | TBP     | 0.04 | 0.00 | 0.05 | -0.03 |
| 6909 | TBX2    | 0.10 | 0.00 | 0.05 | 0.42  |
| 6910 | TBX5    | 0.02 | 0.00 | 0.00 | 0.08  |
| 6911 | TBX6    | 0.02 | 0.00 | 0.00 | -0.06 |
| 6915 | TBXA2R  | 0.02 | 0.00 | 0.15 | 0.05  |
| 6916 | TBXAS1  | 0.00 | 0.00 | 0.05 | -0.10 |
| 6917 | TCEA1   | 0.00 | 0.00 | 0.00 | NaN   |
| 6919 | TCEA2   | 0.08 | 0.00 | 0.05 | 0.16  |
| 6921 | TCEB1   | 0.06 | 0.00 | 0.00 | 0.23  |
| 6923 | TCEB2   | 0.02 | 0.00 | 0.00 | 0.17  |
| 6924 | TCEB3   | 0.02 | 0.00 | 0.05 | 0.06  |
| 6925 | TCF4    | 0.00 | 0.00 | 0.05 | -0.07 |
| 6926 | TBX3    | 0.02 | 0.00 | 0.00 | 0.18  |
| 6929 | TCF3    | 0.02 | 0.00 | 0.05 | 0.23  |
| 6932 | TCF7    | 0.00 | 0.00 | 0.00 | NaN   |
| 6934 | TCF7L2  | 0.00 | 0.14 | 0.05 | 0.18  |
| 6936 | C2orf3  | 0.00 | 0.00 | 0.00 | NaN   |
| 6938 | TCF12   | 0.00 | 0.00 | 0.00 | NaN   |
| 6939 | TCF15   | 0.00 | 0.00 | 0.00 | NaN   |
| 6940 | ZNF354A | 0.08 | 0.43 | 0.10 | -0.10 |
| 6942 | TCF20   | 0.00 | 0.14 | 0.05 | 0.01  |
| 6943 | TCF21   | 0.00 | 0.00 | 0.00 | NaN   |
| 6947 | TCN1    | 0.00 | 0.00 | 0.00 | NaN   |
| 6948 | TCN2    | 0.00 | 0.29 | 0.05 | -0.13 |
| 6949 | TCOF1   | 0.00 | 0.00 | 0.00 | NaN   |
| 6950 | TCP1    | 0.04 | 0.00 | 0.05 | 0.05  |
| 6953 | TCP10   | 0.02 | 0.00 | 0.05 | -0.06 |
| 6954 | TCP11   | 0.00 | 0.00 | 0.00 | NaN   |
| 6988 | TCTA    | 0.06 | 0.00 | 0.05 | 0.03  |
| 6992 | PPP1R11 | 0.04 | 0.14 | 0.05 | 0.15  |
| 6996 | TDG     | 0.00 | 0.00 | 0.00 | NaN   |
| 6997 | TDGF1   | 0.02 | 0.14 | 0.15 | 0.01  |
| 6999 | TDO2    | 0.00 | 0.14 | 0.00 | -0.09 |
| 7001 | PRDX2   | 0.00 | 0.14 | 0.05 | -0.08 |
| 7003 | TEAD1   | 0.00 | 0.00 | 0.00 | NaN   |
| 7004 | TEAD4   | 0.02 | 0.00 | 0.00 | 0.14  |

|      |        |      |      |      |       |
|------|--------|------|------|------|-------|
| 7005 | TEAD3  | 0.04 | 0.00 | 0.00 | -0.03 |
| 7006 | TEC    | 0.00 | 0.00 | 0.00 | NaN   |
| 7007 | TECTA  | 0.00 | 0.00 | 0.00 | NaN   |
| 7008 | TEF    | 0.00 | 0.14 | 0.00 | 0.04  |
| 7010 | TEK    | 0.02 | 0.00 | 0.00 | -0.03 |
| 7011 | TEP1   | 0.02 | 0.00 | 0.00 | -0.08 |
| 7013 | TERF1  | 0.04 | 0.14 | 0.00 | 0.15  |
| 7014 | TERF2  | 0.00 | 0.00 | 0.00 | NaN   |
| 7015 | TERT   | 0.00 | 0.00 | 0.00 | NaN   |
| 7016 | TESK1  | 0.00 | 0.00 | 0.00 | NaN   |
| 7018 | TF     | 0.00 | 0.00 | 0.10 | -0.05 |
| 7019 | TFAM   | 0.02 | 0.00 | 0.05 | 0.14  |
| 7020 | TFAP2A | 0.04 | 0.00 | 0.00 | -0.02 |
| 7021 | TFAP2B | 0.00 | 0.00 | 0.00 | NaN   |
| 7022 | TFAP2C | 0.06 | 0.00 | 0.00 | 0.22  |
| 7023 | TFAP4  | 0.00 | 0.00 | 0.00 | NaN   |
| 7024 | TFCP2  | 0.02 | 0.00 | 0.00 | 0.16  |
| 7025 | NR2F1  | 0.00 | 0.00 | 0.00 | NaN   |
| 7026 | NR2F2  | 0.02 | 0.00 | 0.05 | -0.14 |
| 7029 | TFDP2  | 0.02 | 0.00 | 0.00 | -0.13 |
| 7031 | TFF1   | 0.00 | 0.00 | 0.00 | NaN   |
| 7032 | TFF2   | 0.00 | 0.00 | 0.00 | NaN   |
| 7033 | TFF3   | 0.00 | 0.00 | 0.00 | NaN   |
| 7035 | TFPI   | 0.00 | 0.00 | 0.05 | 0.01  |
| 7036 | TFR2   | 0.00 | 0.00 | 0.00 | NaN   |
| 7037 | TFRC   | 0.02 | 0.00 | 0.00 | 0.20  |
| 7038 | TG     | 0.12 | 0.00 | 0.00 | -0.04 |
| 7039 | TGFA   | 0.00 | 0.14 | 0.00 | 0.00  |
| 7040 | TGFB1  | 0.00 | 0.00 | 0.05 | 0.60  |
| 7042 | TGFB2  | 0.02 | 0.00 | 0.00 | 0.22  |
| 7043 | TGFB3  | 0.00 | 0.00 | 0.00 | NaN   |
| 7045 | TGFBI  | 0.02 | 0.00 | 0.00 | 0.01  |
| 7046 | TGFBR1 | 0.04 | 0.00 | 0.00 | 0.08  |
| 7047 | TGM4   | 0.04 | 0.00 | 0.10 | 0.32  |
| 7048 | TGFBR2 | 0.02 | 0.00 | 0.05 | -0.01 |
| 7049 | TGFBR3 | 0.00 | 0.00 | 0.00 | NaN   |
| 7051 | TGM1   | 0.02 | 0.14 | 0.10 | 0.02  |
| 7052 | TGM2   | 0.02 | 0.00 | 0.00 | 0.39  |
| 7053 | TGM3   | 0.00 | 0.00 | 0.00 | NaN   |
| 7054 | TH     | 0.02 | 0.00 | 0.05 | 0.10  |
| 7056 | THBD   | 0.02 | 0.00 | 0.00 | -0.04 |
| 7057 | THBS1  | 0.02 | 0.00 | 0.00 | 0.38  |
| 7058 | THBS2  | 0.02 | 0.00 | 0.05 | 0.06  |
| 7059 | THBS3  | 0.04 | 0.00 | 0.15 | -0.02 |
| 7060 | THBS4  | 0.00 | 0.00 | 0.00 | NaN   |
| 7064 | THOP1  | 0.00 | 0.00 | 0.00 | NaN   |
| 7066 | THPO   | 0.02 | 0.14 | 0.00 | 0.03  |

|      |          |      |      |      |       |
|------|----------|------|------|------|-------|
| 7067 | THRA     | 0.02 | 0.86 | 0.05 | 0.40  |
| 7068 | THRB     | 0.02 | 0.00 | 0.05 | 0.24  |
| 7070 | THY1     | 0.00 | 0.00 | 0.05 | -0.07 |
| 7072 | TIA1     | 0.00 | 0.14 | 0.00 | 0.14  |
| 7073 | TIAL1    | 0.04 | 0.00 | 0.10 | 0.14  |
| 7074 | TIAM1    | 0.00 | 0.00 | 0.00 | NaN   |
| 7077 | TIMP2    | 0.02 | 0.14 | 0.00 | -0.04 |
| 7078 | TIMP3    | 0.00 | 0.29 | 0.05 | -0.13 |
| 7079 | TIMP4    | 0.00 | 0.00 | 0.05 | 0.04  |
| 7082 | TJP1     | 0.00 | 0.00 | 0.00 | NaN   |
| 7083 | TK1      | 0.02 | 0.14 | 0.05 | -0.11 |
| 7084 | TK2      | 0.02 | 0.00 | 0.00 | 0.23  |
| 7086 | TKT      | 0.02 | 0.00 | 0.00 | -0.04 |
| 7087 | ICAM5    | 0.02 | 0.00 | 0.15 | 0.27  |
| 7088 | TLE1     | 0.00 | 0.00 | 0.00 | NaN   |
| 7089 | TLE2     | 0.00 | 0.00 | 0.00 | NaN   |
| 7090 | TLE3     | 0.00 | 0.00 | 0.00 | NaN   |
| 7091 | TLE4     | 0.00 | 0.00 | 0.00 | NaN   |
| 7092 | TLL1     | 0.02 | 0.00 | 0.00 | -0.02 |
| 7093 | TLL2     | 0.00 | 0.00 | 0.00 | NaN   |
| 7096 | TLR1     | 0.04 | 0.00 | 0.10 | 0.09  |
| 7097 | TLR2     | 0.02 | 0.14 | 0.00 | 0.00  |
| 7098 | TLR3     | 0.00 | 0.00 | 0.00 | NaN   |
| 7099 | TLR4     | 0.02 | 0.00 | 0.00 | -0.07 |
| 7100 | TLR5     | 0.02 | 0.00 | 0.05 | -0.09 |
| 7101 | NR2E1    | 0.02 | 0.00 | 0.10 | 0.20  |
| 7104 | TM4SF4   | 0.00 | 0.00 | 0.00 | NaN   |
| 7108 | TM7SF2   | 0.02 | 0.00 | 0.00 | -0.04 |
| 7110 | TMF1     | 0.02 | 0.00 | 0.00 | -0.15 |
| 7112 | TMPO     | 0.04 | 0.14 | 0.05 | 0.00  |
| 7113 | TMPRSS2  | 0.00 | 0.00 | 0.00 | NaN   |
| 7122 | CLDN5    | 0.06 | 0.14 | 0.15 | -0.09 |
| 7124 | TNF      | 0.02 | 0.00 | 0.05 | -0.05 |
| 7125 | TNNC2    | 0.02 | 0.00 | 0.00 | 0.18  |
| 7126 | TNFAIP1  | 0.10 | 0.00 | 0.05 | 0.12  |
| 7127 | TNFAIP2  | 0.00 | 0.00 | 0.05 | 0.39  |
| 7128 | TNFAIP3  | 0.02 | 0.00 | 0.05 | -0.08 |
| 7130 | TNFAIP6  | 0.00 | 0.00 | 0.00 | NaN   |
| 7132 | TNFRSF1A | 0.02 | 0.00 | 0.15 | 0.05  |
| 7133 | TNFRSF1B | 0.00 | 0.00 | 0.00 | NaN   |
| 7134 | TNNC1    | 0.00 | 0.00 | 0.10 | -0.11 |
| 7135 | TNNI1    | 0.00 | 0.00 | 0.05 | -0.09 |
| 7136 | TNNI2    | 0.02 | 0.00 | 0.05 | 0.10  |
| 7137 | TNNI3    | 0.02 | 0.00 | 0.05 | 0.07  |
| 7139 | TNNT2    | 0.00 | 0.00 | 0.05 | 0.26  |
| 7140 | TNNT3    | 0.02 | 0.00 | 0.05 | 0.15  |
| 7141 | TNP1     | 0.02 | 0.00 | 0.00 | -0.01 |

|      |         |      |      |      |       |
|------|---------|------|------|------|-------|
| 7142 | TNP2    | 0.02 | 0.00 | 0.00 | 0.02  |
| 7143 | TNR     | 0.02 | 0.00 | 0.10 | -0.09 |
| 7148 | TNXB    | 0.02 | 0.00 | 0.05 | 0.16  |
| 7150 | TOP1    | 0.04 | 0.00 | 0.00 | 0.38  |
| 7153 | TOP2A   | 0.02 | 0.86 | 0.05 | 0.22  |
| 7155 | TOP2B   | 0.02 | 0.00 | 0.05 | 0.06  |
| 7156 | TOP3A   | 0.02 | 0.00 | 0.00 | 0.18  |
| 7157 | TP53    | 0.00 | 0.00 | 0.00 | NaN   |
| 7158 | TP53BP1 | 0.04 | 0.00 | 0.00 | -0.02 |
| 7159 | TP53BP2 | 0.02 | 0.00 | 0.05 | 0.03  |
| 7162 | TPBG    | 0.10 | 0.00 | 0.20 | -0.10 |
| 7163 | TPD52   | 0.04 | 0.00 | 0.00 | 0.46  |
| 7164 | TPD52L1 | 0.00 | 0.00 | 0.10 | 0.03  |
| 7165 | TPD52L2 | 0.08 | 0.00 | 0.05 | 0.26  |
| 7167 | TPI1    | 0.02 | 0.00 | 0.15 | 0.27  |
| 7168 | TPM1    | 0.00 | 0.00 | 0.00 | NaN   |
| 7169 | TPM2    | 0.00 | 0.00 | 0.00 | NaN   |
| 7171 | TPM4    | 0.04 | 0.00 | 0.00 | -0.07 |
| 7172 | TPMT    | 0.04 | 0.00 | 0.10 | 0.26  |
| 7173 | TPO     | 0.20 | 0.14 | 0.35 | -0.09 |
| 7174 | TPP2    | 0.02 | 0.00 | 0.00 | 0.24  |
| 7175 | TPR     | 0.00 | 0.00 | 0.05 | -0.04 |
| 7178 | TPT1    | 0.00 | 0.00 | 0.00 | NaN   |
| 7181 | NR2C1   | 0.00 | 0.00 | 0.00 | NaN   |
| 7182 | NR2C2   | 0.00 | 0.00 | 0.05 | 0.05  |
| 7185 | TRAF1   | 0.00 | 0.00 | 0.00 | NaN   |
| 7187 | TRAF3   | 0.00 | 0.00 | 0.05 | 0.06  |
| 7188 | TRAF5   | 0.02 | 0.00 | 0.15 | -0.12 |
| 7189 | TRAF6   | 0.02 | 0.00 | 0.00 | -0.04 |
| 7200 | TRH     | 0.02 | 0.00 | 0.00 | -0.01 |
| 7201 | TRHR    | 0.12 | 0.00 | 0.25 | -0.08 |
| 7203 | CCT3    | 0.04 | 0.14 | 0.05 | 0.02  |
| 7204 | TRIO    | 0.00 | 0.00 | 0.00 | NaN   |
| 7205 | TRIP6   | 0.00 | 0.00 | 0.00 | NaN   |
| 7220 | TRPC1   | 0.02 | 0.00 | 0.00 | -0.02 |
| 7221 | TRPC2   | 0.00 | 0.00 | 0.05 | -0.04 |
| 7222 | TRPC3   | 0.00 | 0.14 | 0.05 | 0.09  |
| 7223 | TRPC4   | 0.02 | 0.00 | 0.00 | 0.23  |
| 7225 | TRPC6   | 0.00 | 0.00 | 0.00 | NaN   |
| 7226 | TRPM2   | 0.02 | 0.00 | 0.00 | -0.03 |
| 7227 | TRPS1   | 0.08 | 0.14 | 0.00 | -0.02 |
| 7247 | TSN     | 0.00 | 0.00 | 0.10 | 0.00  |
| 7248 | TSC1    | 0.04 | 0.00 | 0.00 | -0.06 |
| 7251 | TSG101  | 0.00 | 0.00 | 0.05 | -0.15 |
| 7252 | TSHB    | 0.08 | 0.00 | 0.10 | 0.14  |
| 7253 | TSHR    | 0.02 | 0.00 | 0.00 | 0.29  |
| 7257 | TSNAX   | 0.00 | 0.00 | 0.00 | NaN   |

|      |        |      |      |      |       |
|------|--------|------|------|------|-------|
| 7260 | TSSC1  | 0.20 | 0.14 | 0.35 | -0.17 |
| 7263 | TST    | 0.00 | 0.14 | 0.00 | 0.00  |
| 7264 | TSTA3  | 0.10 | 0.00 | 0.15 | 0.28  |
| 7265 | TTC1   | 0.00 | 0.00 | 0.00 | NaN   |
| 7266 | DNAJC7 | 0.02 | 0.86 | 0.05 | 0.21  |
| 7267 | TTC3   | 0.00 | 0.00 | 0.00 | NaN   |
| 7268 | TTC4   | 0.02 | 0.00 | 0.00 | 0.43  |
| 7270 | TTF1   | 0.04 | 0.00 | 0.00 | -0.06 |
| 7272 | TTK    | 0.10 | 0.00 | 0.20 | 0.23  |
| 7273 | TTN    | 0.02 | 0.00 | 0.00 | -0.04 |
| 7274 | TTPA   | 0.02 | 0.00 | 0.00 | 0.05  |
| 7275 | TUB    | 0.00 | 0.00 | 0.00 | NaN   |
| 7276 | TTR    | 0.02 | 0.00 | 0.10 | -0.10 |
| 7280 | TUBB   | 0.04 | 0.14 | 0.05 | 0.17  |
| 7283 | TUBG1  | 0.02 | 0.86 | 0.05 | 0.05  |
| 7284 | TUFM   | 0.06 | 0.14 | 0.00 | -0.03 |
| 7286 | TUFT1  | 0.02 | 0.00 | 0.10 | -0.44 |
| 7287 | TULP1  | 0.04 | 0.00 | 0.00 | -0.03 |
| 7288 | TULP2  | 0.06 | 0.00 | 0.05 | 0.11  |
| 7289 | TULP3  | 0.08 | 0.14 | 0.10 | 0.07  |
| 7290 | HIRA   | 0.06 | 0.14 | 0.15 | 0.12  |
| 7292 | TNFSF4 | 0.04 | 0.00 | 0.05 | -0.07 |
| 7294 | TXK    | 0.00 | 0.00 | 0.00 | NaN   |
| 7295 | TXN    | 0.02 | 0.00 | 0.05 | 0.17  |
| 7296 | TXNRD1 | 0.00 | 0.00 | 0.00 | NaN   |
| 7297 | TYK2   | 0.02 | 0.00 | 0.15 | 0.24  |
| 7298 | TYMS   | 0.02 | 0.00 | 0.05 | 0.08  |
| 7299 | TYR    | 0.00 | 0.00 | 0.00 | NaN   |
| 7301 | TYRO3  | 0.00 | 0.00 | 0.00 | NaN   |
| 7305 | TYROBP | 0.00 | 0.00 | 0.00 | NaN   |
| 7306 | TYRP1  | 0.00 | 0.00 | 0.00 | NaN   |
| 7307 | U2AF1  | 0.00 | 0.00 | 0.00 | NaN   |
| 7311 | UBA52  | 0.02 | 0.00 | 0.00 | -0.02 |
| 7314 | UBB    | 0.00 | 0.00 | 0.00 | NaN   |
| 7316 | UBC    | 0.02 | 0.00 | 0.10 | -0.04 |
| 7320 | UBE2B  | 0.00 | 0.00 | 0.00 | NaN   |
| 7321 | UBE2D1 | 0.02 | 0.00 | 0.05 | -0.03 |
| 7322 | UBE2D2 | 0.00 | 0.00 | 0.00 | NaN   |
| 7323 | UBE2D3 | 0.08 | 0.00 | 0.00 | 0.28  |
| 7324 | UBE2E1 | 0.02 | 0.00 | 0.05 | -0.08 |
| 7326 | UBE2G1 | 0.04 | 0.00 | 0.10 | 0.14  |
| 7327 | UBE2G2 | 0.02 | 0.00 | 0.00 | -0.13 |
| 7328 | UBE2H  | 0.00 | 0.00 | 0.00 | NaN   |
| 7329 | UBE2I  | 0.18 | 0.00 | 0.10 | 0.04  |
| 7332 | UBE2L3 | 0.06 | 0.14 | 0.15 | 0.16  |
| 7334 | UBE2N  | 0.00 | 0.00 | 0.00 | NaN   |
| 7336 | UBE2V2 | 0.04 | 0.00 | 0.00 | -0.05 |

|      |         |      |      |      |       |
|------|---------|------|------|------|-------|
| 7337 | UBE3A   | 0.02 | 0.00 | 0.05 | 0.09  |
| 7342 | UBP1    | 0.06 | 0.00 | 0.05 | -0.09 |
| 7343 | UBTF    | 0.00 | 0.00 | 0.00 | NaN   |
| 7345 | UCHL1   | 0.00 | 0.00 | 0.05 | -0.07 |
| 7347 | UCHL3   | 0.00 | 0.00 | 0.00 | NaN   |
| 7348 | UPK1B   | 0.00 | 0.00 | 0.00 | NaN   |
| 7349 | UCN     | 0.00 | 0.00 | 0.00 | NaN   |
| 7350 | UCP1    | 0.00 | 0.00 | 0.05 | -0.02 |
| 7351 | UCP2    | 0.02 | 0.14 | 0.00 | 0.32  |
| 7352 | UCP3    | 0.02 | 0.14 | 0.00 | 0.10  |
| 7353 | UFD1L   | 0.06 | 0.14 | 0.15 | 0.11  |
| 7356 | SCGB1A1 | 0.00 | 0.00 | 0.05 | -0.03 |
| 7357 | UGCG    | 0.02 | 0.00 | 0.00 | -0.01 |
| 7358 | UGDH    | 0.04 | 0.00 | 0.10 | -0.13 |
| 7360 | UGP2    | 0.00 | 0.00 | 0.00 | NaN   |
| 7363 | UGT2B4  | 0.00 | 0.14 | 0.00 | 0.10  |
| 7365 | UGT2B10 | 0.00 | 0.14 | 0.00 | -0.05 |
| 7366 | UGT2B15 | 0.00 | 0.14 | 0.00 | 0.07  |
| 7367 | UGT2B17 | 0.00 | 0.14 | 0.00 | 0.03  |
| 7368 | UGT8    | 0.02 | 0.00 | 0.05 | 0.00  |
| 7369 | UMOD    | 0.00 | 0.00 | 0.00 | NaN   |
| 7372 | UMPS    | 0.00 | 0.00 | 0.10 | 0.19  |
| 7373 | COL14A1 | 0.10 | 0.00 | 0.15 | 0.01  |
| 7374 | UNG     | 0.02 | 0.00 | 0.00 | 0.18  |
| 7375 | USP4    | 0.00 | 0.00 | 0.05 | 0.27  |
| 7376 | NR1H2   | 0.00 | 0.00 | 0.00 | NaN   |
| 7379 | UPK2    | 0.00 | 0.00 | 0.05 | 0.01  |
| 7381 | UQCRB   | 0.08 | 0.00 | 0.05 | 0.30  |
| 7384 | UQCRC1  | 0.00 | 0.00 | 0.05 | 0.28  |
| 7385 | UQCRC2  | 0.02 | 0.14 | 0.00 | -0.11 |
| 7386 | UQCRFS1 | 0.00 | 0.14 | 0.05 | 0.36  |
| 7388 | UQCRH   | 0.02 | 0.00 | 0.05 | 0.22  |
| 7389 | UROD    | 0.02 | 0.00 | 0.05 | 0.38  |
| 7390 | UROS    | 0.02 | 0.00 | 0.00 | 0.15  |
| 7392 | USF2    | 0.00 | 0.00 | 0.00 | NaN   |
| 7398 | USP1    | 0.04 | 0.00 | 0.00 | 0.19  |
| 7399 | USH2A   | 0.00 | 0.00 | 0.00 | NaN   |
| 7402 | UTRN    | 0.02 | 0.00 | 0.05 | 0.03  |
| 7405 | UVRAG   | 0.00 | 0.00 | 0.00 | NaN   |
| 7407 | VARS2   | 0.04 | 0.14 | 0.05 | 0.09  |
| 7408 | VASP    | 0.00 | 0.00 | 0.05 | 0.22  |
| 7409 | VAV1    | 0.02 | 0.00 | 0.15 | -0.04 |
| 7410 | VAV2    | 0.04 | 0.00 | 0.00 | -0.07 |
| 7412 | VCAM1   | 0.02 | 0.00 | 0.00 | -0.13 |
| 7414 | VCL     | 0.02 | 0.00 | 0.00 | 0.13  |
| 7415 | VCP     | 0.00 | 0.00 | 0.00 | NaN   |
| 7416 | VDAC1   | 0.00 | 0.00 | 0.00 | NaN   |

|      |         |      |      |      |       |
|------|---------|------|------|------|-------|
| 7419 | VDAC3   | 0.04 | 0.14 | 0.05 | 0.27  |
| 7421 | VDR     | 0.04 | 0.00 | 0.05 | 0.17  |
| 7423 | VEGFB   | 0.02 | 0.00 | 0.00 | 0.07  |
| 7424 | VEGFC   | 0.00 | 0.14 | 0.00 | 0.04  |
| 7425 | VEGF    | 0.00 | 0.14 | 0.00 | 0.02  |
| 7428 | VHL     | 0.02 | 0.00 | 0.05 | 0.01  |
| 7429 | VIL1    | 0.04 | 0.00 | 0.00 | -0.02 |
| 7431 | VIM     | 0.02 | 0.14 | 0.05 | 0.00  |
| 7432 | VIP     | 0.02 | 0.00 | 0.05 | 0.01  |
| 7433 | VIPR1   | 0.00 | 0.00 | 0.05 | 0.41  |
| 7436 | VLDLR   | 0.04 | 0.00 | 0.10 | 0.12  |
| 7441 | VPREB1  | 0.06 | 0.14 | 0.15 | 0.13  |
| 7442 | TRPV1   | 0.04 | 0.00 | 0.10 | -0.16 |
| 7443 | VRK1    | 0.00 | 0.00 | 0.05 | 0.30  |
| 7444 | VRK2    | 0.00 | 0.00 | 0.05 | 0.15  |
| 7447 | VSNL1   | 0.00 | 0.00 | 0.05 | -0.05 |
| 7448 | VTN     | 0.10 | 0.00 | 0.05 | -0.04 |
| 7450 | VWF     | 0.02 | 0.00 | 0.15 | -0.15 |
| 7453 | WARS    | 0.04 | 0.00 | 0.00 | -0.01 |
| 7464 | CORO2A  | 0.04 | 0.00 | 0.00 | -0.08 |
| 7465 | WEE1    | 0.00 | 0.00 | 0.00 | NaN   |
| 7466 | WFS1    | 0.00 | 0.00 | 0.00 | NaN   |
| 7468 | WHSC1   | 0.00 | 0.29 | 0.00 | 0.30  |
| 7469 | WHSC2   | 0.00 | 0.29 | 0.00 | 0.30  |
| 7471 | WNT1    | 0.02 | 0.00 | 0.00 | 0.04  |
| 7472 | WNT2    | 0.00 | 0.00 | 0.15 | -0.16 |
| 7473 | WNT3    | 0.00 | 0.00 | 0.00 | NaN   |
| 7474 | WNT5A   | 0.02 | 0.00 | 0.00 | 0.09  |
| 7475 | WNT6    | 0.04 | 0.00 | 0.00 | 0.06  |
| 7476 | WNT7A   | 0.00 | 0.00 | 0.05 | 0.28  |
| 7477 | WNT7B   | 0.02 | 0.14 | 0.05 | -0.19 |
| 7479 | WNT8B   | 0.00 | 0.00 | 0.05 | -0.03 |
| 7480 | WNT10B  | 0.02 | 0.00 | 0.00 | -0.08 |
| 7481 | WNT11   | 0.00 | 0.00 | 0.00 | NaN   |
| 7482 | WNT2B   | 0.02 | 0.00 | 0.05 | 0.04  |
| 7485 | WRB     | 0.00 | 0.00 | 0.00 | NaN   |
| 7486 | WRN     | 0.04 | 0.00 | 0.00 | -0.07 |
| 7490 | WT1     | 0.00 | 0.00 | 0.00 | NaN   |
| 7494 | XBP1    | 0.00 | 0.14 | 0.05 | -0.16 |
| 7498 | XDH     | 0.00 | 0.00 | 0.00 | NaN   |
| 7507 | XPA     | 0.04 | 0.00 | 0.00 | -0.05 |
| 7508 | XPC     | 0.00 | 0.00 | 0.05 | -0.07 |
| 7511 | XPNPEP1 | 0.00 | 0.14 | 0.00 | -0.04 |
| 7514 | XPO1    | 0.00 | 0.00 | 0.00 | NaN   |
| 7515 | XRCC1   | 0.00 | 0.00 | 0.00 | NaN   |
| 7516 | XRCC2   | 0.02 | 0.00 | 0.00 | -0.01 |
| 7518 | XRCC4   | 0.02 | 0.00 | 0.00 | 0.12  |



|      |        |      |      |      |       |
|------|--------|------|------|------|-------|
| 7520 | XRCC5  | 0.02 | 0.00 | 0.00 | 0.10  |
| 7525 | YES1   | 0.00 | 0.00 | 0.00 | NaN   |
| 7528 | YY1    | 0.04 | 0.00 | 0.00 | -0.18 |
| 7529 | YWHAB  | 0.02 | 0.00 | 0.00 | 0.50  |
| 7531 | YWHAE  | 0.04 | 0.00 | 0.05 | 0.13  |
| 7533 | YWHAH  | 0.00 | 0.29 | 0.05 | 0.08  |
| 7534 | YWHAZ  | 0.12 | 0.00 | 0.25 | 0.34  |
| 7535 | ZAP70  | 0.00 | 0.00 | 0.10 | -0.09 |
| 7536 | SF1    | 0.02 | 0.00 | 0.00 | 0.11  |
| 7538 | ZFP36  | 0.06 | 0.00 | 0.05 | -0.13 |
| 7539 | ZFP37  | 0.02 | 0.00 | 0.00 | 0.06  |
| 7541 | ZFP161 | 0.02 | 0.00 | 0.00 | 0.12  |
| 7542 | ZFPL1  | 0.02 | 0.00 | 0.00 | 0.15  |
| 7545 | ZIC1   | 0.04 | 0.00 | 0.00 | -0.08 |
| 7553 | ZNF7   | 0.10 | 0.00 | 0.15 | 0.31  |
| 7554 | ZNF8   | 0.00 | 0.00 | 0.00 | NaN   |
| 7561 | ZNF14  | 0.12 | 0.00 | 0.15 | -0.03 |
| 7564 | ZNF16  | 0.10 | 0.00 | 0.15 | 0.25  |
| 7568 | ZNF20  | 0.06 | 0.14 | 0.00 | 0.02  |
| 7570 | ZNF22  | 0.02 | 0.00 | 0.10 | 0.07  |
| 7571 | ZNF23  | 0.00 | 0.00 | 0.05 | -0.14 |
| 7572 | ZNF24  | 0.04 | 0.00 | 0.05 | 0.26  |
| 7580 | ZNF32  | 0.00 | 0.00 | 0.00 | NaN   |
| 7584 | ZNF35  | 0.04 | 0.00 | 0.10 | -0.04 |
| 7587 | ZNF37A | 0.04 | 0.29 | 0.25 | 0.09  |
| 7594 | ZNF43  | 0.12 | 0.00 | 0.15 | -0.06 |
| 7595 | ZNF44  | 0.06 | 0.14 | 0.00 | -0.04 |
| 7596 | ZNF45  | 0.00 | 0.00 | 0.00 | NaN   |
| 7625 | ZNF74  | 0.06 | 0.14 | 0.15 | 0.28  |
| 7629 | ZNF76  | 0.04 | 0.00 | 0.00 | -0.11 |
| 7633 | ZNF79  | 0.02 | 0.00 | 0.00 | 0.04  |
| 7634 | ZNF80  | 0.02 | 0.00 | 0.00 | -0.10 |
| 7638 | ZNF221 | 0.00 | 0.00 | 0.00 | NaN   |
| 7639 | ZNF85  | 0.12 | 0.00 | 0.15 | 0.03  |
| 7644 | ZNF91  | 0.12 | 0.00 | 0.15 | -0.06 |
| 7670 | ZNF117 | 0.00 | 0.00 | 0.00 | NaN   |
| 7673 | ZNF222 | 0.00 | 0.00 | 0.00 | NaN   |
| 7681 | MKRN3  | 0.14 | 0.14 | 0.25 | -0.15 |
| 7690 | ZNF131 | 0.18 | 0.00 | 0.30 | 0.45  |
| 7691 | ZNF132 | 0.00 | 0.00 | 0.00 | NaN   |
| 7692 | ZNF133 | 0.02 | 0.00 | 0.00 | 0.00  |
| 7693 | ZNF134 | 0.00 | 0.00 | 0.00 | NaN   |
| 7695 | ZNF136 | 0.06 | 0.14 | 0.00 | 0.08  |
| 7696 | ZNF137 | 0.02 | 0.00 | 0.05 | -0.10 |
| 7701 | ZNF142 | 0.04 | 0.00 | 0.00 | 0.21  |
| 7702 | ZNF143 | 0.00 | 0.00 | 0.00 | NaN   |
| 7705 | ZNF146 | 0.02 | 0.00 | 0.05 | 0.10  |

|      |         |      |      |      |       |
|------|---------|------|------|------|-------|
| 7707 | ZNF148  | 0.00 | 0.00 | 0.10 | 0.19  |
| 7710 | ZNF154  | 0.00 | 0.00 | 0.00 | NaN   |
| 7711 | ZNF155  | 0.00 | 0.00 | 0.00 | NaN   |
| 7718 | ZNF165  | 0.04 | 0.14 | 0.05 | -0.09 |
| 7726 | TRIM26  | 0.04 | 0.14 | 0.05 | 0.08  |
| 7727 | ZNF174  | 0.02 | 0.00 | 0.00 | 0.09  |
| 7728 | ZNF175  | 0.02 | 0.00 | 0.05 | 0.01  |
| 7730 | ZNF177  | 0.02 | 0.00 | 0.15 | -0.08 |
| 7733 | ZNF180  | 0.00 | 0.00 | 0.00 | NaN   |
| 7738 | ZNF184  | 0.00 | 0.14 | 0.00 | -0.05 |
| 7741 | ZNF187  | 0.04 | 0.14 | 0.05 | -0.16 |
| 7743 | ZNF189  | 0.04 | 0.00 | 0.00 | -0.19 |
| 7745 | ZNF192  | 0.04 | 0.14 | 0.05 | 0.07  |
| 7746 | ZNF193  | 0.04 | 0.14 | 0.05 | -0.05 |
| 7748 | ZNF195  | 0.02 | 0.00 | 0.05 | 0.05  |
| 7752 | ZNF200  | 0.02 | 0.00 | 0.00 | 0.06  |
| 7753 | ZNF202  | 0.02 | 0.00 | 0.00 | 0.04  |
| 7755 | ZNF205  | 0.02 | 0.00 | 0.00 | 0.00  |
| 7756 | ZNF207  | 0.04 | 0.00 | 0.05 | 0.23  |
| 7757 | ZNF208  | 0.12 | 0.00 | 0.15 | 0.03  |
| 7761 | ZNF214  | 0.00 | 0.00 | 0.00 | NaN   |
| 7762 | ZNF215  | 0.00 | 0.00 | 0.00 | NaN   |
| 7764 | ZNF217  | 0.12 | 0.14 | 0.00 | 0.33  |
| 7766 | ZNF223  | 0.00 | 0.00 | 0.00 | NaN   |
| 7768 | ZNF225  | 0.00 | 0.00 | 0.00 | NaN   |
| 7769 | ZNF226  | 0.00 | 0.00 | 0.00 | NaN   |
| 7773 | ZNF230  | 0.00 | 0.00 | 0.00 | NaN   |
| 7775 | ZNF232  | 0.04 | 0.00 | 0.10 | 0.06  |
| 7776 | ZNF236  | 0.00 | 0.00 | 0.05 | 0.10  |
| 7781 | SLC30A3 | 0.00 | 0.00 | 0.00 | NaN   |
| 7782 | SLC30A4 | 0.02 | 0.00 | 0.05 | -0.05 |
| 7783 | ZP2     | 0.02 | 0.14 | 0.00 | -0.05 |
| 7786 | MAP3K12 | 0.00 | 0.00 | 0.00 | NaN   |
| 7791 | ZYX     | 0.00 | 0.14 | 0.05 | 0.02  |
| 7799 | PRDM2   | 0.00 | 0.00 | 0.00 | NaN   |
| 7803 | PTP4A1  | 0.12 | 0.00 | 0.05 | 0.02  |
| 7804 | LRP8    | 0.02 | 0.00 | 0.00 | 0.03  |
| 7805 | LAPTM5  | 0.00 | 0.14 | 0.00 | 0.10  |
| 7813 | EVI5    | 0.00 | 0.00 | 0.00 | NaN   |
| 7818 | DAP3    | 0.04 | 0.00 | 0.15 | 0.19  |
| 7827 | NPHS2   | 0.04 | 0.00 | 0.10 | -0.07 |
| 7832 | BTG2    | 0.00 | 0.00 | 0.00 | NaN   |
| 7840 | ALMS1   | 0.00 | 0.00 | 0.05 | -0.02 |
| 7849 | PAX8    | 0.00 | 0.00 | 0.10 | 0.16  |
| 7850 | IL1R2   | 0.02 | 0.00 | 0.10 | 0.07  |
| 7852 | CXCR4   | 0.00 | 0.00 | 0.00 | NaN   |
| 7855 | FZD5    | 0.02 | 0.00 | 0.05 | -0.05 |

|      |          |      |      |      |       |
|------|----------|------|------|------|-------|
| 7857 | SCG2     | 0.00 | 0.00 | 0.00 | NaN   |
| 7862 | BRPF1    | 0.00 | 0.00 | 0.10 | 0.19  |
| 7866 | IFRD2    | 0.00 | 0.00 | 0.10 | 0.08  |
| 7867 | MAPKAPK3 | 0.00 | 0.00 | 0.10 | 0.02  |
| 7869 | SEMA3B   | 0.00 | 0.00 | 0.05 | -0.01 |
| 7873 | ARMET    | 0.00 | 0.00 | 0.10 | -0.18 |
| 7874 | USP7     | 0.00 | 0.00 | 0.00 | NaN   |
| 7881 | KCNAB1   | 0.02 | 0.00 | 0.10 | 0.05  |
| 7884 | SLBP     | 0.02 | 0.00 | 0.00 | -0.10 |
| 7913 | DEK      | 0.04 | 0.00 | 0.10 | 0.01  |
| 7915 | ALDH5A1  | 0.00 | 0.00 | 0.00 | NaN   |
| 7916 | BAT2     | 0.02 | 0.00 | 0.05 | 0.18  |
| 7917 | BAT3     | 0.02 | 0.00 | 0.05 | -0.03 |
| 7919 | BAT1     | 0.04 | 0.14 | 0.05 | 0.02  |
| 7936 | RDBP     | 0.02 | 0.00 | 0.05 | 0.26  |
| 7941 | PLA2G7   | 0.04 | 0.14 | 0.20 | 0.20  |
| 7957 | EPM2A    | 0.02 | 0.00 | 0.05 | 0.02  |
| 7965 | JTV1     | 0.02 | 0.00 | 0.00 | 0.06  |
| 7975 | MAFK     | 0.04 | 0.00 | 0.05 | -0.08 |
| 7976 | FZD3     | 0.00 | 0.00 | 0.00 | NaN   |
| 7978 | MTERF    | 0.00 | 0.00 | 0.00 | NaN   |
| 7980 | TFPI2    | 0.02 | 0.00 | 0.00 | -0.04 |
| 7982 | ST7      | 0.00 | 0.00 | 0.00 | NaN   |
| 7984 | ARHGEF5  | 0.02 | 0.00 | 0.05 | 0.08  |
| 7988 | ZNF212   | 0.06 | 0.00 | 0.15 | 0.06  |
| 8000 | PSCA     | 0.10 | 0.00 | 0.15 | 0.27  |
| 8001 | GLRA3    | 0.00 | 0.00 | 0.00 | NaN   |
| 8013 | NR4A3    | 0.04 | 0.00 | 0.00 | 0.12  |
| 8019 | BRD3     | 0.04 | 0.00 | 0.00 | -0.12 |
| 8021 | NUP214   | 0.04 | 0.00 | 0.00 | -0.15 |
| 8027 | STAM     | 0.02 | 0.14 | 0.05 | 0.14  |
| 8028 | MLLT10   | 0.00 | 0.00 | 0.00 | NaN   |
| 8029 | CUBN     | 0.02 | 0.14 | 0.05 | -0.06 |
| 8031 | NCOA4    | 0.02 | 0.00 | 0.05 | 0.15  |
| 8034 | SLC25A16 | 0.04 | 0.14 | 0.20 | 0.02  |
| 8036 | SHOC2    | 0.00 | 0.14 | 0.00 | -0.05 |
| 8038 | ADAM12   | 0.02 | 0.00 | 0.00 | 0.22  |
| 8048 | CSRP3    | 0.00 | 0.00 | 0.05 | -0.22 |
| 8050 | PDX1     | 0.00 | 0.00 | 0.05 | 0.03  |
| 8061 | FOSL1    | 0.04 | 0.00 | 0.05 | 0.12  |
| 8065 | CUL5     | 0.04 | 0.00 | 0.00 | 0.06  |
| 8073 | PTP4A2   | 0.00 | 0.14 | 0.00 | 0.02  |
| 8074 | FGF23    | 0.02 | 0.00 | 0.00 | -0.02 |
| 8078 | USP5     | 0.02 | 0.00 | 0.15 | 0.13  |
| 8079 | MLF2     | 0.02 | 0.00 | 0.15 | 0.09  |
| 8082 | SSPN     | 0.00 | 0.00 | 0.00 | NaN   |
| 8085 | MLL2     | 0.00 | 0.00 | 0.00 | NaN   |

|      |          |      |      |      |       |
|------|----------|------|------|------|-------|
| 8086 | AAAS     | 0.00 | 0.00 | 0.00 | NaN   |
| 8087 | FXR1     | 0.00 | 0.00 | 0.10 | 0.37  |
| 8099 | CDK2AP1  | 0.02 | 0.00 | 0.10 | 0.00  |
| 8106 | PABPN1   | 0.02 | 0.14 | 0.10 | -0.01 |
| 8111 | GPR68    | 0.02 | 0.00 | 0.00 | -0.07 |
| 8115 | TCL1A    | 0.00 | 0.00 | 0.05 | -0.03 |
| 8120 | AP3B2    | 0.02 | 0.00 | 0.00 | -0.08 |
| 8125 | ANP32A   | 0.00 | 0.00 | 0.15 | -0.01 |
| 8139 | GAN      | 0.02 | 0.00 | 0.00 | -0.02 |
| 8140 | SLC7A5   | 0.00 | 0.00 | 0.10 | 0.13  |
| 8148 | TAF15    | 0.06 | 0.00 | 0.00 | 0.31  |
| 8161 | COIL     | 0.04 | 0.00 | 0.05 | 0.42  |
| 8165 | AKAP1    | 0.04 | 0.00 | 0.05 | 0.33  |
| 8170 | SLC14A2  | 0.02 | 0.00 | 0.00 | -0.10 |
| 8174 | MADCAM1  | 0.06 | 0.00 | 0.15 | 0.18  |
| 8175 | SF3A2    | 0.02 | 0.00 | 0.05 | 0.15  |
| 8178 | ELL      | 0.02 | 0.00 | 0.00 | 0.07  |
| 8187 | ZNF239   | 0.02 | 0.00 | 0.05 | -0.07 |
| 8190 | MIA      | 0.00 | 0.00 | 0.05 | 0.03  |
| 8192 | CLPP     | 0.02 | 0.00 | 0.15 | -0.05 |
| 8195 | MKKS     | 0.00 | 0.00 | 0.05 | -0.15 |
| 8200 | GDF5     | 0.06 | 0.14 | 0.05 | 0.14  |
| 8202 | NCOA3    | 0.02 | 0.00 | 0.00 | 0.24  |
| 8204 | NRIP1    | 0.00 | 0.00 | 0.10 | -0.06 |
| 8208 | CHAF1B   | 0.00 | 0.00 | 0.05 | 0.10  |
| 8209 | C21orf33 | 0.02 | 0.00 | 0.00 | 0.10  |
| 8214 | DGCR6    | 0.02 | 0.14 | 0.20 | 0.09  |
| 8216 | LZTR1    | 0.06 | 0.14 | 0.15 | 0.21  |
| 8218 | CLTCL1   | 0.02 | 0.14 | 0.20 | 0.18  |
| 8224 | SYN3     | 0.00 | 0.29 | 0.05 | 0.02  |
| 8288 | EPX      | 0.04 | 0.00 | 0.05 | -0.05 |
| 8291 | DYSF     | 0.00 | 0.00 | 0.05 | -0.10 |
| 8292 | COLQ     | 0.00 | 0.00 | 0.05 | -0.08 |
| 8295 | TRRAP    | 0.02 | 0.00 | 0.00 | 0.17  |
| 8301 | PICALM   | 0.00 | 0.00 | 0.05 | 0.12  |
| 8302 | KLRC4    | 0.02 | 0.00 | 0.15 | 0.01  |
| 8303 | SNN      | 0.00 | 0.00 | 0.00 | NaN   |
| 8309 | ACOX2    | 0.02 | 0.00 | 0.00 | -0.04 |
| 8310 | ACOX3    | 0.02 | 0.00 | 0.00 | 0.17  |
| 8312 | AXIN1    | 0.18 | 0.00 | 0.10 | -0.16 |
| 8314 | BAP1     | 0.00 | 0.00 | 0.10 | 0.03  |
| 8315 | BRAP     | 0.00 | 0.00 | 0.00 | NaN   |
| 8318 | CDC45L   | 0.06 | 0.14 | 0.15 | 0.29  |
| 8321 | FZD1     | 0.00 | 0.00 | 0.00 | NaN   |
| 8322 | FZD4     | 0.02 | 0.00 | 0.00 | 0.10  |
| 8323 | FZD6     | 0.12 | 0.00 | 0.25 | 0.38  |
| 8324 | FZD7     | 0.00 | 0.00 | 0.00 | NaN   |

|      |          |      |      |      |       |
|------|----------|------|------|------|-------|
| 8326 | FZD9     | 0.00 | 0.00 | 0.00 | NaN   |
| 8328 | GFI1B    | 0.04 | 0.00 | 0.00 | 0.06  |
| 8372 | HYAL3    | 0.00 | 0.00 | 0.10 | -0.08 |
| 8379 | MAD1L1   | 0.04 | 0.00 | 0.05 | 0.00  |
| 8382 | NME5     | 0.02 | 0.00 | 0.00 | -0.11 |
| 8383 | OR1A1    | 0.04 | 0.00 | 0.10 | -0.05 |
| 8385 | OR1D4    | 0.04 | 0.00 | 0.10 | -0.03 |
| 8387 | OR1E1    | 0.04 | 0.00 | 0.10 | 0.06  |
| 8388 | OR1E2    | 0.04 | 0.00 | 0.10 | 0.07  |
| 8390 | OR1G1    | 0.04 | 0.00 | 0.10 | -0.18 |
| 8392 | OR3A3    | 0.04 | 0.00 | 0.10 | -0.06 |
| 8394 | PIP5K1A  | 0.02 | 0.00 | 0.10 | 0.22  |
| 8395 | PIP5K1B  | 0.00 | 0.00 | 0.00 | NaN   |
| 8398 | PLA2G6   | 0.00 | 0.14 | 0.00 | 0.11  |
| 8399 | PLA2G10  | 0.02 | 0.00 | 0.05 | 0.10  |
| 8402 | SLC25A11 | 0.04 | 0.00 | 0.10 | 0.13  |
| 8403 | SOX14    | 0.00 | 0.00 | 0.00 | NaN   |
| 8404 | SPARCL1  | 0.02 | 0.00 | 0.00 | -0.14 |
| 8405 | SPOP     | 0.04 | 0.00 | 0.05 | 0.05  |
| 8408 | ULK1     | 0.08 | 0.14 | 0.05 | -0.04 |
| 8411 | EEA1     | 0.00 | 0.00 | 0.00 | NaN   |
| 8412 | BCAR3    | 0.00 | 0.00 | 0.00 | NaN   |
| 8416 | ANXA9    | 0.02 | 0.00 | 0.10 | -0.05 |
| 8417 | STX7     | 0.02 | 0.00 | 0.00 | -0.05 |
| 8418 | CMAH     | 0.02 | 0.00 | 0.05 | 0.00  |
| 8419 | BFSP2    | 0.00 | 0.00 | 0.10 | 0.09  |
| 8424 | BBOX1    | 0.00 | 0.00 | 0.00 | NaN   |
| 8425 | LTBP4    | 0.00 | 0.00 | 0.05 | 0.07  |
| 8427 | ZNF282   | 0.06 | 0.00 | 0.15 | 0.11  |
| 8428 | STK24    | 0.00 | 0.00 | 0.05 | 0.18  |
| 8431 | NROB2    | 0.06 | 0.00 | 0.05 | 0.05  |
| 8433 | UTF1     | 0.00 | 0.00 | 0.00 | NaN   |
| 8434 | RECK     | 0.02 | 0.00 | 0.00 | 0.10  |
| 8435 | SOAT2    | 0.00 | 0.00 | 0.00 | NaN   |
| 8436 | SDPR     | 0.00 | 0.00 | 0.05 | 0.08  |
| 8437 | RASAL1   | 0.02 | 0.00 | 0.00 | -0.06 |
| 8438 | RAD54L   | 0.02 | 0.00 | 0.05 | 0.15  |
| 8439 | NSMAF    | 0.04 | 0.00 | 0.00 | 0.06  |
| 8440 | NCK2     | 0.02 | 0.00 | 0.10 | 0.07  |
| 8443 | GNPAT    | 0.00 | 0.00 | 0.05 | 0.12  |
| 8444 | DYRK3    | 0.00 | 0.00 | 0.05 | 0.09  |
| 8445 | DYRK2    | 0.08 | 0.14 | 0.00 | 0.38  |
| 8446 | DUSP11   | 0.00 | 0.00 | 0.05 | 0.09  |
| 8448 | DOC2A    | 0.06 | 0.14 | 0.00 | 0.07  |
| 8451 | CUL4A    | 0.06 | 0.00 | 0.00 | 0.14  |
| 8452 | CUL3     | 0.00 | 0.00 | 0.00 | NaN   |
| 8453 | CUL2     | 0.04 | 0.29 | 0.25 | 0.35  |

|      |          |      |      |      |       |
|------|----------|------|------|------|-------|
| 8454 | CUL1     | 0.06 | 0.00 | 0.15 | 0.29  |
| 8455 | ATRN     | 0.02 | 0.00 | 0.00 | -0.11 |
| 8458 | TTF2     | 0.08 | 0.00 | 0.10 | -0.18 |
| 8459 | TPST2    | 0.00 | 0.14 | 0.05 | 0.02  |
| 8460 | TPST1    | 0.04 | 0.00 | 0.00 | -0.02 |
| 8464 | SUPT3H   | 0.04 | 0.14 | 0.20 | 0.09  |
| 8467 | SMARCA5  | 0.00 | 0.00 | 0.00 | NaN   |
| 8468 | FKBP6    | 0.00 | 0.00 | 0.00 | NaN   |
| 8477 | GPR65    | 0.00 | 0.00 | 0.00 | NaN   |
| 8479 | HIRIP3   | 0.06 | 0.14 | 0.00 | 0.18  |
| 8480 | RAE1     | 0.08 | 0.00 | 0.05 | 0.63  |
| 8482 | SEMA7A   | 0.00 | 0.00 | 0.00 | NaN   |
| 8483 | CILP     | 0.00 | 0.00 | 0.10 | 0.01  |
| 8484 | GALR3    | 0.00 | 0.14 | 0.00 | 0.29  |
| 8487 | SIP1     | 0.04 | 0.00 | 0.00 | 0.13  |
| 8490 | RGS5     | 0.00 | 0.00 | 0.00 | NaN   |
| 8491 | MAP4K3   | 0.02 | 0.00 | 0.05 | -0.33 |
| 8492 | PRSS12   | 0.02 | 0.00 | 0.05 | 0.12  |
| 8493 | PPM1D    | 0.10 | 0.00 | 0.05 | 0.37  |
| 8495 | PPFIBP2  | 0.00 | 0.00 | 0.00 | NaN   |
| 8496 | PPFIBP1  | 0.00 | 0.00 | 0.00 | NaN   |
| 8498 | RANBP3   | 0.02 | 0.00 | 0.15 | 0.11  |
| 8499 | PPFIA2   | 0.02 | 0.00 | 0.00 | 0.00  |
| 8500 | PPFIA1   | 0.16 | 0.00 | 0.10 | 0.50  |
| 8502 | PKP4     | 0.00 | 0.00 | 0.05 | 0.04  |
| 8503 | PIK3R3   | 0.02 | 0.00 | 0.05 | 0.16  |
| 8504 | PEX3     | 0.02 | 0.00 | 0.05 | -0.07 |
| 8505 | PARG     | 0.02 | 0.00 | 0.05 | 0.08  |
| 8506 | CNTNAP1  | 0.02 | 0.86 | 0.05 | 0.06  |
| 8507 | ENC1     | 0.06 | 0.00 | 0.00 | -0.17 |
| 8508 | NIPSNAP1 | 0.00 | 0.14 | 0.00 | -0.05 |
| 8509 | NDST2    | 0.02 | 0.00 | 0.00 | 0.03  |
| 8513 | LIPF     | 0.02 | 0.00 | 0.05 | -0.09 |
| 8514 | KCNAB2   | 0.22 | 0.29 | 0.15 | -0.06 |
| 8515 | ITGA10   | 0.02 | 0.00 | 0.00 | 0.02  |
| 8516 | ITGA8    | 0.02 | 0.14 | 0.05 | -0.09 |
| 8518 | IKBKAP   | 0.02 | 0.00 | 0.05 | 0.03  |
| 8519 | IFITM1   | 0.06 | 0.29 | 0.10 | -0.06 |
| 8520 | HAT1     | 0.00 | 0.00 | 0.00 | NaN   |
| 8522 | GAS7     | 0.02 | 0.00 | 0.00 | 0.07  |
| 8525 | DGKZ     | 0.00 | 0.00 | 0.05 | 0.11  |
| 8526 | DGKE     | 0.04 | 0.00 | 0.05 | 0.05  |
| 8527 | DGKD     | 0.00 | 0.00 | 0.00 | NaN   |
| 8528 | DDO      | 0.02 | 0.00 | 0.10 | -0.10 |
| 8529 | CYP4F2   | 0.04 | 0.00 | 0.00 | 0.09  |
| 8530 | CST7     | 0.04 | 0.00 | 0.15 | -0.05 |
| 8531 | CSDA     | 0.02 | 0.00 | 0.15 | 0.04  |

|      |          |      |      |      |       |
|------|----------|------|------|------|-------|
| 8532 | CPZ      | 0.02 | 0.00 | 0.00 | 0.03  |
| 8533 | COPS3    | 0.02 | 0.00 | 0.00 | 0.00  |
| 8534 | CHST1    | 0.04 | 0.00 | 0.05 | -0.01 |
| 8535 | CBX4     | 0.00 | 0.14 | 0.00 | -0.03 |
| 8536 | CAMK1    | 0.00 | 0.00 | 0.10 | -0.04 |
| 8537 | BCAS1    | 0.14 | 0.00 | 0.05 | 0.23  |
| 8538 | BARX2    | 0.02 | 0.00 | 0.00 | -0.06 |
| 8539 | API5     | 0.00 | 0.00 | 0.00 | NaN   |
| 8540 | AGPS     | 0.02 | 0.00 | 0.00 | 0.01  |
| 8541 | PPFIA3   | 0.06 | 0.00 | 0.05 | 0.22  |
| 8542 | APOL1    | 0.00 | 0.14 | 0.00 | 0.12  |
| 8543 | LMO4     | 0.04 | 0.00 | 0.05 | 0.17  |
| 8545 | CGGBP1   | 0.16 | 0.14 | 0.30 | 0.02  |
| 8546 | AP3B1    | 0.00 | 0.00 | 0.00 | NaN   |
| 8547 | FCN3     | 0.04 | 0.00 | 0.00 | 0.06  |
| 8548 | BLZF1    | 0.02 | 0.00 | 0.00 | 0.08  |
| 8550 | MAPKAPK5 | 0.00 | 0.00 | 0.00 | NaN   |
| 8554 | PIAS1    | 0.00 | 0.00 | 0.15 | 0.22  |
| 8555 | CDC14B   | 0.00 | 0.00 | 0.00 | NaN   |
| 8556 | CDC14A   | 0.02 | 0.00 | 0.00 | 0.17  |
| 8557 | TCAP     | 0.02 | 0.86 | 0.05 | 0.39  |
| 8558 | CDK10    | 0.00 | 0.00 | 0.10 | 0.04  |
| 8562 | DENR     | 0.02 | 0.00 | 0.10 | -0.04 |
| 8564 | KMO      | 0.06 | 0.00 | 0.00 | 0.01  |
| 8565 | YARS     | 0.00 | 0.00 | 0.00 | NaN   |
| 8566 | PDXK     | 0.02 | 0.00 | 0.00 | -0.06 |
| 8567 | MADD     | 0.04 | 0.00 | 0.00 | 0.09  |
| 8569 | MKNK1    | 0.02 | 0.00 | 0.05 | 0.05  |
| 8570 | KHSRP    | 0.02 | 0.00 | 0.15 | 0.06  |
| 8574 | AKR7A2   | 0.00 | 0.00 | 0.00 | NaN   |
| 8575 | PRKRA    | 0.02 | 0.00 | 0.00 | 0.07  |
| 8576 | STK16    | 0.04 | 0.00 | 0.00 | 0.01  |
| 8577 | TMEFF1   | 0.04 | 0.00 | 0.00 | 0.11  |
| 8600 | TNFSF11  | 0.02 | 0.00 | 0.00 | 0.01  |
| 8601 | RGS20    | 0.00 | 0.00 | 0.00 | NaN   |
| 8604 | SLC25A12 | 0.00 | 0.00 | 0.00 | NaN   |
| 8605 | PLA2G4C  | 0.00 | 0.00 | 0.00 | NaN   |
| 8607 | RUVBL1   | 0.04 | 0.00 | 0.00 | 0.25  |
| 8609 | KLF7     | 0.02 | 0.00 | 0.05 | 0.18  |
| 8611 | PPAP2A   | 0.00 | 0.14 | 0.05 | -0.17 |
| 8612 | PPAP2C   | 0.06 | 0.00 | 0.15 | 0.08  |
| 8613 | PPAP2B   | 0.02 | 0.00 | 0.00 | 0.20  |
| 8614 | STC2     | 0.00 | 0.00 | 0.05 | -0.04 |
| 8618 | CADPS    | 0.04 | 0.00 | 0.00 | -0.24 |
| 8620 | NPFF     | 0.00 | 0.00 | 0.00 | NaN   |
| 8621 | CDC2L5   | 0.00 | 0.00 | 0.00 | NaN   |
| 8625 | RFXANK   | 0.12 | 0.00 | 0.15 | -0.07 |

|      |          |      |      |      |       |
|------|----------|------|------|------|-------|
| 8626 | TP63     | 0.00 | 0.00 | 0.00 | NaN   |
| 8629 | JRK      | 0.10 | 0.00 | 0.15 | 0.23  |
| 8633 | UNC5C    | 0.04 | 0.00 | 0.05 | -0.17 |
| 8634 | RTCD1    | 0.02 | 0.00 | 0.00 | -0.03 |
| 8638 | OASL     | 0.02 | 0.00 | 0.10 | 0.15  |
| 8639 | AOC3     | 0.02 | 0.86 | 0.05 | -0.12 |
| 8643 | PTCH2    | 0.02 | 0.00 | 0.05 | 0.16  |
| 8644 | AKR1C3   | 0.00 | 0.00 | 0.00 | NaN   |
| 8645 | KCNK5    | 0.02 | 0.00 | 0.05 | 0.11  |
| 8646 | CHRD     | 0.02 | 0.14 | 0.00 | 0.18  |
| 8647 | ABCB11   | 0.00 | 0.00 | 0.00 | NaN   |
| 8648 | NCOA1    | 0.00 | 0.00 | 0.00 | NaN   |
| 8650 | NUMB     | 0.02 | 0.00 | 0.05 | 0.12  |
| 8654 | PDE5A    | 0.00 | 0.00 | 0.00 | NaN   |
| 8658 | TNKS     | 0.02 | 0.14 | 0.10 | 0.00  |
| 8659 | ALDH4A1  | 0.00 | 0.00 | 0.00 | NaN   |
| 8660 | IRS2     | 0.00 | 0.00 | 0.05 | -0.01 |
| 8671 | SLC4A4   | 0.02 | 0.00 | 0.05 | -0.02 |
| 8672 | EIF4G3   | 0.02 | 0.00 | 0.05 | -0.05 |
| 8673 | VAMP8    | 0.00 | 0.00 | 0.00 | NaN   |
| 8674 | VAMP4    | 0.04 | 0.00 | 0.05 | 0.16  |
| 8676 | STX11    | 0.02 | 0.00 | 0.05 | -0.11 |
| 8677 | STX10    | 0.00 | 0.14 | 0.05 | -0.08 |
| 8678 | BECN1    | 0.02 | 0.86 | 0.05 | -0.08 |
| 8681 | PLA2G4B  | 0.00 | 0.00 | 0.00 | NaN   |
| 8682 | PEA15    | 0.00 | 0.00 | 0.00 | NaN   |
| 8683 | SFRS9    | 0.02 | 0.00 | 0.10 | 0.10  |
| 8685 | MARCO    | 0.00 | 0.00 | 0.10 | -0.01 |
| 8690 | JRKL     | 0.00 | 0.00 | 0.00 | NaN   |
| 8692 | HYAL2    | 0.00 | 0.00 | 0.10 | -0.06 |
| 8693 | GALNT4   | 0.00 | 0.00 | 0.00 | NaN   |
| 8694 | DGAT1    | 0.10 | 0.00 | 0.15 | 0.41  |
| 8697 | CDC23    | 0.02 | 0.00 | 0.00 | 0.09  |
| 8702 | B4GALT4  | 0.00 | 0.00 | 0.00 | NaN   |
| 8703 | B4GALT3  | 0.00 | 0.00 | 0.00 | NaN   |
| 8704 | B4GALT2  | 0.02 | 0.00 | 0.05 | 0.13  |
| 8705 | B3GALT4  | 0.02 | 0.00 | 0.05 | 0.30  |
| 8707 | B3GALT2  | 0.00 | 0.00 | 0.00 | NaN   |
| 8708 | B3GALT1  | 0.00 | 0.00 | 0.00 | NaN   |
| 8710 | SERPINB7 | 0.02 | 0.00 | 0.00 | 0.00  |
| 8711 | TNK1     | 0.02 | 0.00 | 0.00 | -0.02 |
| 8714 | ABCC3    | 0.10 | 0.00 | 0.10 | 0.02  |
| 8715 | NOL4     | 0.04 | 0.00 | 0.10 | -0.07 |
| 8717 | TRADD    | 0.02 | 0.00 | 0.00 | 0.06  |
| 8720 | MBTPS1   | 0.00 | 0.00 | 0.00 | NaN   |
| 8722 | CTSF     | 0.04 | 0.00 | 0.05 | 0.06  |
| 8723 | SNX4     | 0.00 | 0.00 | 0.10 | 0.27  |



|      |           |      |      |      |       |
|------|-----------|------|------|------|-------|
| 8724 | SNX3      | 0.02 | 0.00 | 0.10 | 0.35  |
| 8726 | EED       | 0.02 | 0.00 | 0.00 | 0.06  |
| 8727 | CTNNA1    | 0.02 | 0.00 | 0.05 | 0.17  |
| 8728 | ADAM19    | 0.00 | 0.00 | 0.00 | NaN   |
| 8729 | GBF1      | 0.02 | 0.00 | 0.00 | -0.18 |
| 8731 | RNMT      | 0.08 | 0.14 | 0.10 | 0.10  |
| 8732 | RNGTT     | 0.00 | 0.00 | 0.05 | 0.02  |
| 8733 | GPAA1     | 0.10 | 0.00 | 0.15 | 0.35  |
| 8735 | MYH13     | 0.04 | 0.00 | 0.00 | 0.12  |
| 8736 | MYOM1     | 0.02 | 0.00 | 0.00 | 0.01  |
| 8738 | CRADD     | 0.00 | 0.00 | 0.05 | -0.07 |
| 8739 | HRK       | 0.02 | 0.00 | 0.10 | -0.02 |
| 8740 | TNFSF14   | 0.02 | 0.00 | 0.15 | 0.05  |
| 8741 | TNFSF13   | 0.02 | 0.00 | 0.00 | 0.04  |
| 8743 | TNFSF10   | 0.06 | 0.00 | 0.00 | -0.13 |
| 8744 | TNFSF9    | 0.02 | 0.00 | 0.15 | 0.00  |
| 8745 | ADAM23    | 0.00 | 0.00 | 0.00 | NaN   |
| 8747 | ADAM21    | 0.02 | 0.00 | 0.05 | 0.00  |
| 8748 | ADAM20    | 0.02 | 0.00 | 0.05 | -0.07 |
| 8749 | ADAM18    | 0.12 | 0.14 | 0.15 | -0.17 |
| 8754 | ADAM9     | 0.12 | 0.14 | 0.15 | 0.35  |
| 8756 | ADAM7     | 0.00 | 0.00 | 0.00 | NaN   |
| 8760 | CDS2      | 0.00 | 0.00 | 0.10 | 0.13  |
| 8761 | PABPC4    | 0.02 | 0.00 | 0.05 | -0.03 |
| 8763 | CD164     | 0.02 | 0.00 | 0.10 | 0.25  |
| 8766 | RAB11A    | 0.00 | 0.00 | 0.00 | NaN   |
| 8767 | RIPK2     | 0.06 | 0.00 | 0.15 | 0.30  |
| 8771 | TNFRSF6B  | 0.08 | 0.00 | 0.05 | 0.17  |
| 8772 | FADD      | 0.16 | 0.00 | 0.10 | 0.38  |
| 8773 | SNAP23    | 0.04 | 0.00 | 0.00 | 0.13  |
| 8774 | NAPG      | 0.00 | 0.00 | 0.00 | NaN   |
| 8775 | NAPA      | 0.00 | 0.00 | 0.00 | NaN   |
| 8777 | MPDZ      | 0.00 | 0.00 | 0.00 | NaN   |
| 8778 | SIGLEC5   | 0.02 | 0.00 | 0.05 | 0.11  |
| 8785 | MATN4     | 0.04 | 0.00 | 0.05 | 0.06  |
| 8786 | RGS11     | 0.18 | 0.00 | 0.10 | -0.09 |
| 8787 | RGS9      | 0.12 | 0.00 | 0.20 | 0.38  |
| 8788 | DLK1      | 0.04 | 0.00 | 0.00 | -0.03 |
| 8789 | FBP2      | 0.00 | 0.00 | 0.00 | NaN   |
| 8790 | FPGT      | 0.04 | 0.14 | 0.00 | -0.12 |
| 8792 | TNFRSF11A | 0.02 | 0.00 | 0.00 | -0.04 |
| 8793 | TNFRSF10D | 0.02 | 0.00 | 0.00 | 0.29  |
| 8794 | TNFRSF10C | 0.02 | 0.00 | 0.00 | 0.13  |
| 8795 | TNFRSF10B | 0.02 | 0.00 | 0.00 | 0.07  |
| 8796 | SCEL      | 0.02 | 0.00 | 0.00 | -0.07 |
| 8798 | DYRK4     | 0.02 | 0.00 | 0.00 | -0.26 |
| 8799 | PEX11B    | 0.02 | 0.00 | 0.00 | -0.02 |

|      |         |      |      |      |       |
|------|---------|------|------|------|-------|
| 8800 | PEX11A  | 0.00 | 0.00 | 0.00 | NaN   |
| 8801 | SUCLG2  | 0.04 | 0.00 | 0.00 | 0.22  |
| 8802 | SUCLG1  | 0.00 | 0.00 | 0.00 | NaN   |
| 8803 | SUCLA2  | 0.00 | 0.00 | 0.00 | NaN   |
| 8807 | IL18RAP | 0.02 | 0.00 | 0.10 | 0.14  |
| 8808 | IL1RL2  | 0.02 | 0.00 | 0.10 | 0.19  |
| 8809 | IL18R1  | 0.02 | 0.00 | 0.10 | 0.06  |
| 8811 | GALR2   | 0.02 | 0.14 | 0.05 | -0.10 |
| 8813 | DPM1    | 0.10 | 0.00 | 0.00 | 0.17  |
| 8814 | CDKL1   | 0.00 | 0.00 | 0.00 | NaN   |
| 8817 | FGF18   | 0.02 | 0.00 | 0.00 | -0.10 |
| 8818 | DPM2    | 0.00 | 0.00 | 0.00 | NaN   |
| 8819 | SAP30   | 0.00 | 0.00 | 0.00 | NaN   |
| 8820 | HESX1   | 0.00 | 0.00 | 0.05 | -0.09 |
| 8821 | INPP4B  | 0.00 | 0.00 | 0.00 | NaN   |
| 8822 | FGF17   | 0.00 | 0.00 | 0.05 | 0.16  |
| 8824 | CES2    | 0.02 | 0.00 | 0.00 | 0.03  |
| 8826 | IQGAP1  | 0.00 | 0.00 | 0.00 | NaN   |
| 8828 | NRP2    | 0.00 | 0.00 | 0.00 | NaN   |
| 8829 | NRP1    | 0.02 | 0.14 | 0.00 | 0.09  |
| 8832 | CD84    | 0.00 | 0.00 | 0.00 | NaN   |
| 8833 | GMPS    | 0.02 | 0.00 | 0.10 | -0.01 |
| 8836 | GGH     | 0.02 | 0.00 | 0.00 | 0.06  |
| 8837 | CFLAR   | 0.00 | 0.00 | 0.05 | 0.25  |
| 8838 | WISP3   | 0.02 | 0.00 | 0.05 | -0.02 |
| 8839 | WISP2   | 0.02 | 0.00 | 0.00 | -0.04 |
| 8840 | WISP1   | 0.06 | 0.00 | 0.00 | 0.05  |
| 8851 | CDK5R1  | 0.04 | 0.00 | 0.05 | 0.06  |
| 8854 | ALDH1A2 | 0.00 | 0.00 | 0.00 | NaN   |
| 8856 | NR1I2   | 0.00 | 0.00 | 0.10 | 0.09  |
| 8857 | FCGBP   | 0.06 | 0.00 | 0.05 | -0.09 |
| 8858 | PROZ    | 0.06 | 0.00 | 0.00 | 0.00  |
| 8859 | STK19   | 0.02 | 0.00 | 0.05 | 0.34  |
| 8861 | LDB1    | 0.02 | 0.00 | 0.00 | -0.08 |
| 8863 | PER3    | 0.00 | 0.00 | 0.00 | NaN   |
| 8864 | PER2    | 0.08 | 0.43 | 0.10 | 0.27  |
| 8867 | SYNJ1   | 0.00 | 0.00 | 0.00 | NaN   |
| 8870 | IER3    | 0.04 | 0.14 | 0.05 | 0.05  |
| 8871 | SYNJ2   | 0.04 | 0.00 | 0.05 | -0.01 |
| 8874 | ARHGEF7 | 0.00 | 0.00 | 0.00 | NaN   |
| 8875 | VNN2    | 0.02 | 0.00 | 0.00 | -0.02 |
| 8876 | VNN1    | 0.02 | 0.00 | 0.00 | -0.03 |
| 8877 | SPHK1   | 0.00 | 0.14 | 0.05 | 0.12  |
| 8878 | SQSTM1  | 0.08 | 0.43 | 0.10 | -0.05 |
| 8879 | SGPL1   | 0.00 | 0.00 | 0.00 | NaN   |
| 8880 | FUBP1   | 0.06 | 0.00 | 0.00 | -0.12 |
| 8882 | ZNF259  | 0.02 | 0.00 | 0.00 | -0.07 |

|      |          |      |      |      |       |
|------|----------|------|------|------|-------|
| 8884 | SLC5A6   | 0.00 | 0.00 | 0.00 | NaN   |
| 8886 | DDX18    | 0.00 | 0.00 | 0.10 | 0.11  |
| 8887 | TAX1BP1  | 0.00 | 0.00 | 0.05 | 0.04  |
| 8888 | MCM3AP   | 0.00 | 0.00 | 0.05 | 0.02  |
| 8891 | EIF2B3   | 0.02 | 0.00 | 0.05 | 0.23  |
| 8892 | EIF2B2   | 0.02 | 0.00 | 0.05 | 0.06  |
| 8893 | EIF2B5   | 0.00 | 0.00 | 0.00 | NaN   |
| 8894 | EIF2S2   | 0.02 | 0.00 | 0.05 | -0.28 |
| 8895 | CPNE3    | 0.06 | 0.00 | 0.15 | 0.06  |
| 8897 | MTMR3    | 0.00 | 0.29 | 0.05 | 0.25  |
| 8898 | MTMR2    | 0.00 | 0.00 | 0.00 | NaN   |
| 8900 | CCNA1    | 0.02 | 0.00 | 0.00 | -0.06 |
| 8904 | CPNE1    | 0.06 | 0.14 | 0.05 | 0.38  |
| 8906 | AP1G2    | 0.02 | 0.14 | 0.10 | -0.06 |
| 8909 | P11      | 0.04 | 0.00 | 0.05 | -0.09 |
| 8910 | SGCE     | 0.02 | 0.00 | 0.00 | 0.06  |
| 8911 | CACNA1I  | 0.00 | 0.14 | 0.00 | 0.32  |
| 8912 | CACNA1H  | 0.18 | 0.00 | 0.10 | 0.02  |
| 8913 | CACNA1G  | 0.10 | 0.00 | 0.10 | 0.05  |
| 8914 | TIMELESS | 0.00 | 0.00 | 0.00 | NaN   |
| 8915 | BCL10    | 0.04 | 0.00 | 0.05 | 0.10  |
| 8916 | HERC3    | 0.00 | 0.00 | 0.00 | NaN   |
| 8924 | HERC2    | 0.00 | 0.00 | 0.00 | NaN   |
| 8925 | HERC1    | 0.02 | 0.00 | 0.00 | 0.07  |
| 8926 | SNURF    | 0.00 | 0.14 | 0.00 | -0.05 |
| 8927 | BSN      | 0.06 | 0.00 | 0.05 | 0.01  |
| 8928 | FOXH1    | 0.10 | 0.00 | 0.15 | 0.06  |
| 8930 | MBD4     | 0.02 | 0.00 | 0.00 | 0.28  |
| 8932 | MBD2     | 0.00 | 0.00 | 0.05 | 0.04  |
| 8934 | RAB7L1   | 0.02 | 0.00 | 0.05 | 0.07  |
| 8936 | WASF1    | 0.02 | 0.00 | 0.10 | 0.29  |
| 8938 | BAIAP3   | 0.18 | 0.00 | 0.10 | 0.06  |
| 8939 | FUBP3    | 0.04 | 0.00 | 0.00 | -0.03 |
| 8940 | TOP3B    | 0.06 | 0.14 | 0.15 | 0.32  |
| 8941 | CDK5R2   | 0.04 | 0.00 | 0.00 | -0.11 |
| 8942 | KYNU     | 0.02 | 0.00 | 0.00 | 0.06  |
| 8943 | AP3D1    | 0.02 | 0.00 | 0.05 | 0.04  |
| 8945 | BTRC     | 0.02 | 0.00 | 0.00 | 0.14  |
| 8971 | H1FX     | 0.02 | 0.00 | 0.00 | 0.20  |
| 8972 | MGAM     | 0.00 | 0.14 | 0.05 | -0.04 |
| 8973 | CHRNA6   | 0.04 | 0.14 | 0.05 | -0.05 |
| 8974 | P4HA2    | 0.02 | 0.00 | 0.00 | 0.08  |
| 8975 | USP13    | 0.00 | 0.00 | 0.10 | 0.24  |
| 8976 | WASL     | 0.00 | 0.00 | 0.00 | NaN   |
| 8985 | PLOD3    | 0.00 | 0.14 | 0.00 | 0.06  |
| 8986 | RPS6KA4  | 0.02 | 0.00 | 0.00 | -0.01 |
| 8988 | HSPB3    | 0.04 | 0.00 | 0.00 | 0.29  |

|      |          |      |      |      |       |
|------|----------|------|------|------|-------|
| 8991 | SELENBP1 | 0.02 | 0.00 | 0.10 | -0.24 |
| 8994 | LIMD1    | 0.02 | 0.14 | 0.15 | -0.20 |
| 8995 | TNFSF18  | 0.04 | 0.00 | 0.05 | -0.09 |
| 8996 | NOL3     | 0.02 | 0.00 | 0.00 | 0.13  |
| 8999 | CDKL2    | 0.00 | 0.00 | 0.00 | NaN   |
| 9001 | HAP1     | 0.02 | 0.86 | 0.05 | 0.17  |
| 9002 | F2RL3    | 0.04 | 0.00 | 0.00 | -0.05 |
| 9013 | TAF1C    | 0.00 | 0.00 | 0.00 | NaN   |
| 9014 | TAF1B    | 0.00 | 0.00 | 0.00 | NaN   |
| 9015 | TAF1A    | 0.02 | 0.00 | 0.00 | 0.00  |
| 9019 | MPZL1    | 0.00 | 0.00 | 0.10 | 0.23  |
| 9020 | MAP3K14  | 0.00 | 0.00 | 0.05 | -0.08 |
| 9023 | CH25H    | 0.02 | 0.00 | 0.05 | 0.09  |
| 9025 | RNF8     | 0.00 | 0.00 | 0.00 | NaN   |
| 9027 | NAT8     | 0.00 | 0.00 | 0.05 | -0.16 |
| 9031 | BAZ1B    | 0.00 | 0.00 | 0.00 | NaN   |
| 9032 | TM4SF5   | 0.04 | 0.00 | 0.10 | 0.01  |
| 9033 | PKD2L1   | 0.00 | 0.00 | 0.05 | 0.12  |
| 9034 | CCRL2    | 0.02 | 0.14 | 0.15 | 0.40  |
| 9037 | SEMA5A   | 0.00 | 0.00 | 0.00 | NaN   |
| 9040 | UBE2M    | 0.00 | 0.00 | 0.00 | NaN   |
| 9043 | SPAG9    | 0.10 | 0.00 | 0.10 | 0.22  |
| 9044 | BTAF1    | 0.02 | 0.00 | 0.05 | 0.08  |
| 9045 | RPL14    | 0.02 | 0.00 | 0.05 | -0.01 |
| 9046 | DOK2     | 0.00 | 0.00 | 0.05 | 0.09  |
| 9047 | SH2D2A   | 0.04 | 0.14 | 0.05 | 0.02  |
| 9048 | ARTN     | 0.02 | 0.00 | 0.05 | -0.04 |
| 9049 | AIP      | 0.02 | 0.00 | 0.00 | 0.57  |
| 9050 | PSTPIP2  | 0.02 | 0.00 | 0.00 | 0.03  |
| 9051 | PSTPIP1  | 0.00 | 0.00 | 0.05 | -0.07 |
| 9053 | MAP7     | 0.00 | 0.00 | 0.10 | 0.04  |
| 9054 | NFS1     | 0.06 | 0.14 | 0.05 | 0.36  |
| 9055 | PRC1     | 0.02 | 0.00 | 0.10 | 0.25  |
| 9056 | SLC7A7   | 0.02 | 0.00 | 0.00 | 0.02  |
| 9057 | SLC7A6   | 0.02 | 0.00 | 0.00 | 0.05  |
| 9058 | SLC13A2  | 0.10 | 0.00 | 0.05 | 0.05  |
| 9060 | PAPSS2   | 0.00 | 0.00 | 0.00 | NaN   |
| 9061 | PAPSS1   | 0.08 | 0.00 | 0.00 | -0.05 |
| 9064 | MAP3K6   | 0.00 | 0.00 | 0.00 | NaN   |
| 9070 | ASH2L    | 0.12 | 0.14 | 0.05 | 0.39  |
| 9071 | CLDN10   | 0.04 | 0.00 | 0.00 | -0.13 |
| 9074 | CLDN6    | 0.02 | 0.00 | 0.00 | -0.09 |
| 9076 | CLDN1    | 0.00 | 0.00 | 0.05 | -0.06 |
| 9079 | LDB2     | 0.00 | 0.00 | 0.00 | NaN   |
| 9080 | CLDN9    | 0.02 | 0.00 | 0.00 | -0.02 |
| 9088 | PKMYT1   | 0.02 | 0.00 | 0.00 | -0.16 |
| 9090 | PSIP1    | 0.04 | 0.00 | 0.05 | 0.33  |

|      |          |      |      |      |       |
|------|----------|------|------|------|-------|
| 9091 | PIGQ     | 0.18 | 0.00 | 0.10 | -0.02 |
| 9092 | SART1    | 0.04 | 0.00 | 0.05 | 0.05  |
| 9093 | DNAJA3   | 0.00 | 0.00 | 0.00 | NaN   |
| 9094 | UNC119   | 0.10 | 0.00 | 0.05 | 0.10  |
| 9095 | TBX19    | 0.00 | 0.00 | 0.10 | 0.24  |
| 9097 | USP14    | 0.02 | 0.00 | 0.05 | 0.16  |
| 9098 | USP6     | 0.04 | 0.00 | 0.10 | 0.01  |
| 9099 | USP2     | 0.00 | 0.00 | 0.05 | 0.14  |
| 9100 | USP10    | 0.00 | 0.00 | 0.00 | NaN   |
| 9101 | USP8     | 0.00 | 0.00 | 0.00 | NaN   |
| 9107 | MTMR6    | 0.06 | 0.00 | 0.00 | 0.12  |
| 9108 | MTMR7    | 0.00 | 0.00 | 0.10 | 0.05  |
| 9110 | MTMR4    | 0.04 | 0.00 | 0.05 | 0.07  |
| 9111 | NMI      | 0.00 | 0.00 | 0.00 | NaN   |
| 9112 | MTA1     | 0.02 | 0.00 | 0.10 | -0.01 |
| 9113 | LATS1    | 0.02 | 0.00 | 0.05 | 0.00  |
| 9114 | ATP6V0D1 | 0.02 | 0.00 | 0.00 | 0.00  |
| 9120 | SLC16A6  | 0.12 | 0.00 | 0.20 | -0.04 |
| 9121 | SLC16A5  | 0.02 | 0.14 | 0.00 | 0.57  |
| 9122 | SLC16A4  | 0.06 | 0.14 | 0.00 | -0.13 |
| 9123 | SLC16A3  | 0.00 | 0.00 | 0.00 | NaN   |
| 9124 | PDLIM1   | 0.00 | 0.00 | 0.00 | NaN   |
| 9125 | RQCD1    | 0.04 | 0.00 | 0.00 | 0.01  |
| 9128 | PRPF4    | 0.00 | 0.00 | 0.00 | NaN   |
| 9132 | KCNQ4    | 0.02 | 0.00 | 0.05 | -0.07 |
| 9133 | CCNB2    | 0.00 | 0.00 | 0.00 | NaN   |
| 9134 | CCNE2    | 0.08 | 0.00 | 0.05 | 0.41  |
| 9138 | ARHGEF1  | 0.00 | 0.00 | 0.05 | 0.36  |
| 9139 | CBFA2T2  | 0.00 | 0.00 | 0.00 | NaN   |
| 9141 | PDCD5    | 0.00 | 0.00 | 0.00 | NaN   |
| 9143 | SYNGR3   | 0.18 | 0.00 | 0.10 | -0.01 |
| 9144 | SYNGR2   | 0.02 | 0.14 | 0.05 | -0.40 |
| 9145 | SYNGR1   | 0.00 | 0.14 | 0.05 | 0.08  |
| 9146 | HGS      | 0.00 | 0.00 | 0.00 | NaN   |
| 9147 | SDCCAG1  | 0.00 | 0.00 | 0.00 | NaN   |
| 9148 | NEURL    | 0.02 | 0.00 | 0.00 | 0.02  |
| 9149 | DYRK1B   | 0.06 | 0.00 | 0.05 | 0.11  |
| 9150 | CTDP1    | 0.02 | 0.00 | 0.05 | 0.15  |
| 9152 | SLC6A5   | 0.02 | 0.00 | 0.00 | 0.01  |
| 9153 | SLC28A2  | 0.02 | 0.00 | 0.05 | 0.02  |
| 9154 | SLC28A1  | 0.00 | 0.00 | 0.00 | NaN   |
| 9158 | FIBP     | 0.04 | 0.00 | 0.05 | -0.44 |
| 9159 | PCSK7    | 0.02 | 0.00 | 0.00 | -0.16 |
| 9162 | DGKI     | 0.00 | 0.00 | 0.05 | 0.22  |
| 9166 | EBAG9    | 0.08 | 0.14 | 0.00 | 0.13  |
| 9167 | COX7A2L  | 0.02 | 0.00 | 0.05 | -0.18 |
| 9168 | TMSB10   | 0.00 | 0.00 | 0.00 | NaN   |

|      |          |      |      |      |       |
|------|----------|------|------|------|-------|
| 9169 | SFRS2IP  | 0.04 | 0.00 | 0.05 | 0.06  |
| 9172 | MYOM2    | 0.00 | 0.00 | 0.00 | NaN   |
| 9173 | IL1RL1   | 0.02 | 0.00 | 0.10 | 0.00  |
| 9175 | MAP3K13  | 0.02 | 0.14 | 0.00 | -0.13 |
| 9177 | HTR3B    | 0.00 | 0.00 | 0.00 | NaN   |
| 9179 | AP4M1    | 0.02 | 0.00 | 0.00 | 0.31  |
| 9180 | OSMR     | 0.04 | 0.00 | 0.00 | -0.03 |
| 9181 | ARHGEF2  | 0.04 | 0.14 | 0.05 | 0.00  |
| 9183 | ZW10     | 0.00 | 0.00 | 0.00 | NaN   |
| 9184 | BUB3     | 0.04 | 0.00 | 0.05 | 0.08  |
| 9187 | SLC24A1  | 0.00 | 0.00 | 0.00 | NaN   |
| 9188 | DDX21    | 0.04 | 0.14 | 0.20 | 0.05  |
| 9191 | DEDD     | 0.00 | 0.00 | 0.00 | NaN   |
| 9194 | SLC16A7  | 0.02 | 0.00 | 0.05 | 0.00  |
| 9196 | KCNAB3   | 0.00 | 0.00 | 0.00 | NaN   |
| 9200 | PTPLA    | 0.02 | 0.14 | 0.05 | -0.04 |
| 9208 | LRRFIP1  | 0.00 | 0.00 | 0.00 | NaN   |
| 9209 | LRRFIP2  | 0.02 | 0.14 | 0.10 | 0.08  |
| 9211 | LGI1     | 0.02 | 0.00 | 0.05 | -0.10 |
| 9215 | LARGE    | 0.00 | 0.29 | 0.05 | 0.12  |
| 9217 | VAPB     | 0.08 | 0.00 | 0.00 | 0.66  |
| 9218 | VAPA     | 0.00 | 0.00 | 0.05 | 0.10  |
| 9220 | TIAF1    | 0.10 | 0.00 | 0.05 | -0.10 |
| 9221 | NOLC1    | 0.02 | 0.00 | 0.00 | 0.04  |
| 9227 | LRAT     | 0.00 | 0.00 | 0.00 | NaN   |
| 9228 | DLGAP2   | 0.00 | 0.00 | 0.00 | NaN   |
| 9229 | DLGAP1   | 0.00 | 0.00 | 0.00 | NaN   |
| 9230 | RAB11B   | 0.02 | 0.00 | 0.15 | 0.04  |
| 9231 | DLG5     | 0.02 | 0.00 | 0.10 | 0.00  |
| 9232 | PTTG1    | 0.00 | 0.00 | 0.00 | NaN   |
| 9240 | PNMA1    | 0.02 | 0.00 | 0.05 | 0.02  |
| 9242 | MSC      | 0.04 | 0.14 | 0.00 | -0.09 |
| 9244 | CRLF1    | 0.02 | 0.00 | 0.00 | 0.00  |
| 9245 | GCNT3    | 0.00 | 0.00 | 0.00 | NaN   |
| 9246 | UBE2L6   | 0.00 | 0.00 | 0.00 | NaN   |
| 9252 | RPS6KA5  | 0.00 | 0.00 | 0.00 | NaN   |
| 9254 | CACNA2D2 | 0.00 | 0.00 | 0.10 | -0.17 |
| 9255 | SCYE1    | 0.08 | 0.00 | 0.00 | 0.17  |
| 9258 | MFHAS1   | 0.02 | 0.14 | 0.10 | 0.19  |
| 9261 | MAPKAPK2 | 0.00 | 0.00 | 0.05 | 0.07  |
| 9262 | STK17B   | 0.00 | 0.00 | 0.05 | 0.24  |
| 9263 | STK17A   | 0.00 | 0.00 | 0.00 | NaN   |
| 9271 | PIWIL1   | 0.02 | 0.00 | 0.10 | -0.02 |
| 9274 | BCL7C    | 0.02 | 0.00 | 0.00 | -0.24 |
| 9275 | BCL7B    | 0.00 | 0.00 | 0.00 | NaN   |
| 9276 | COPB2    | 0.00 | 0.00 | 0.05 | 0.04  |
| 9284 | NPIP     | 0.02 | 0.00 | 0.05 | -0.03 |

|      |          |      |      |      |       |
|------|----------|------|------|------|-------|
| 9289 | GPR56    | 0.02 | 0.00 | 0.00 | 0.11  |
| 9293 | GPR52    | 0.02 | 0.00 | 0.10 | 0.00  |
| 9295 | SFRS11   | 0.04 | 0.14 | 0.00 | 0.15  |
| 9296 | ATP6V1F  | 0.00 | 0.00 | 0.05 | -0.05 |
| 9308 | CD83     | 0.02 | 0.00 | 0.00 | -0.13 |
| 9311 | ACCN3    | 0.02 | 0.00 | 0.00 | -0.01 |
| 9312 | KCNB2    | 0.04 | 0.14 | 0.00 | 0.25  |
| 9313 | MMP20    | 0.00 | 0.00 | 0.00 | NaN   |
| 9314 | KLF4     | 0.00 | 0.00 | 0.00 | NaN   |
| 9317 | PTER     | 0.02 | 0.14 | 0.05 | -0.10 |
| 9319 | TRIP13   | 0.00 | 0.00 | 0.00 | NaN   |
| 9320 | TRIP12   | 0.02 | 0.00 | 0.15 | 0.11  |
| 9321 | TRIP11   | 0.00 | 0.00 | 0.05 | -0.08 |
| 9322 | TRIP10   | 0.02 | 0.00 | 0.15 | 0.01  |
| 9325 | TRIP4    | 0.02 | 0.00 | 0.00 | -0.26 |
| 9328 | GTF3C5   | 0.04 | 0.00 | 0.00 | -0.11 |
| 9329 | GTF3C4   | 0.04 | 0.00 | 0.00 | -0.05 |
| 9330 | GTF3C3   | 0.00 | 0.00 | 0.05 | -0.03 |
| 9331 | B4GALT6  | 0.02 | 0.00 | 0.10 | 0.06  |
| 9332 | CD163    | 0.02 | 0.00 | 0.15 | 0.37  |
| 9333 | TGM5     | 0.04 | 0.00 | 0.00 | -0.06 |
| 9334 | B4GALT5  | 0.06 | 0.00 | 0.00 | 0.26  |
| 9337 | CNOT8    | 0.02 | 0.00 | 0.00 | 0.34  |
| 9340 | GLP2R    | 0.02 | 0.00 | 0.00 | 0.07  |
| 9341 | VAMP3    | 0.00 | 0.00 | 0.00 | NaN   |
| 9342 | SNAP29   | 0.06 | 0.14 | 0.15 | 0.09  |
| 9348 | NDST3    | 0.02 | 0.00 | 0.05 | -0.13 |
| 9349 | RPL23    | 0.02 | 0.86 | 0.05 | 0.19  |
| 9350 | CER1     | 0.04 | 0.00 | 0.05 | -0.10 |
| 9351 | SLC9A3R2 | 0.18 | 0.00 | 0.10 | 0.17  |
| 9353 | SLIT2    | 0.02 | 0.00 | 0.00 | 0.31  |
| 9354 | UBE4A    | 0.00 | 0.00 | 0.00 | NaN   |
| 9355 | LHX2     | 0.06 | 0.00 | 0.00 | 0.39  |
| 9356 | SLC22A6  | 0.00 | 0.00 | 0.00 | NaN   |
| 9358 | ITGBL1   | 0.00 | 0.00 | 0.00 | NaN   |
| 9360 | PPIG     | 0.00 | 0.00 | 0.00 | NaN   |
| 9362 | CPNE6    | 0.02 | 0.14 | 0.10 | 0.01  |
| 9364 | RAB28    | 0.00 | 0.00 | 0.05 | -0.13 |
| 9365 | KL       | 0.00 | 0.00 | 0.05 | -0.02 |
| 9368 | SLC9A3R1 | 0.04 | 0.00 | 0.00 | 0.09  |
| 9369 | NRXN3    | 0.02 | 0.00 | 0.00 | 0.08  |
| 9371 | KIF3B    | 0.04 | 0.00 | 0.15 | -0.03 |
| 9373 | PLAA     | 0.02 | 0.00 | 0.00 | 0.05  |
| 9374 | PPT2     | 0.02 | 0.00 | 0.05 | 0.02  |
| 9375 | TM9SF2   | 0.00 | 0.00 | 0.05 | 0.00  |
| 9376 | SLC22A8  | 0.00 | 0.00 | 0.00 | NaN   |
| 9377 | COX5A    | 0.00 | 0.00 | 0.05 | 0.07  |

|      |           |      |      |      |       |
|------|-----------|------|------|------|-------|
| 9378 | NRXN1     | 0.02 | 0.00 | 0.05 | -0.08 |
| 9379 | NRXN2     | 0.02 | 0.00 | 0.00 | -0.08 |
| 9380 | GRHPR     | 0.04 | 0.00 | 0.00 | 0.06  |
| 9381 | OTOF      | 0.00 | 0.00 | 0.00 | NaN   |
| 9388 | LIPG      | 0.00 | 0.00 | 0.00 | NaN   |
| 9391 | CIAO1     | 0.04 | 0.00 | 0.05 | 0.21  |
| 9397 | NMT2      | 0.02 | 0.14 | 0.05 | 0.01  |
| 9398 | IGSF2     | 0.08 | 0.00 | 0.10 | 0.17  |
| 9399 | STOML1    | 0.02 | 0.00 | 0.00 | -0.02 |
| 9400 | RECQL5    | 0.02 | 0.14 | 0.00 | 0.55  |
| 9401 | RECQL4    | 0.10 | 0.00 | 0.15 | 0.32  |
| 9402 | GRAP2     | 0.00 | 0.14 | 0.00 | -0.08 |
| 9403 | 9/15/2010 | 0.04 | 0.00 | 0.05 | 0.12  |
| 9409 | PEX16     | 0.04 | 0.00 | 0.05 | -0.03 |
| 9414 | TJP2      | 0.00 | 0.00 | 0.00 | NaN   |
| 9415 | FADS2     | 0.00 | 0.00 | 0.05 | 0.12  |
| 9419 | CRIPT     | 0.00 | 0.00 | 0.00 | NaN   |
| 9420 | CYP7B1    | 0.00 | 0.00 | 0.05 | -0.08 |
| 9421 | HAND1     | 0.02 | 0.00 | 0.00 | 0.01  |
| 9422 | ZNF264    | 0.00 | 0.00 | 0.05 | -0.07 |
| 9423 | NTN1      | 0.00 | 0.00 | 0.00 | NaN   |
| 9425 | CDYL      | 0.08 | 0.14 | 0.10 | -0.06 |
| 9427 | ECEL1     | 0.00 | 0.00 | 0.05 | 0.07  |
| 9429 | ABCG2     | 0.02 | 0.00 | 0.00 | 0.00  |
| 9435 | CHST2     | 0.00 | 0.14 | 0.00 | -0.08 |
| 9444 | QKI       | 0.02 | 0.00 | 0.05 | 0.05  |
| 9445 | ITM2B     | 0.00 | 0.00 | 0.00 | NaN   |
| 9447 | AIM2      | 0.00 | 0.00 | 0.00 | NaN   |
| 9448 | MAP4K4    | 0.02 | 0.00 | 0.10 | 0.31  |
| 9451 | EIF2AK3   | 0.04 | 0.00 | 0.05 | 0.08  |
| 9453 | GGPS1     | 0.02 | 0.00 | 0.00 | 0.15  |
| 9462 | RASAL2    | 0.04 | 0.00 | 0.10 | 0.07  |
| 9464 | HAND2     | 0.00 | 0.00 | 0.00 | NaN   |
| 9465 | AKAP7     | 0.00 | 0.00 | 0.00 | NaN   |
| 9467 | SH3BP5    | 0.00 | 0.00 | 0.05 | -0.06 |
| 9469 | CHST3     | 0.04 | 0.00 | 0.05 | 0.07  |
| 9472 | AKAP6     | 0.02 | 0.00 | 0.00 | 0.21  |
| 9475 | ROCK2     | 0.00 | 0.00 | 0.00 | NaN   |
| 9478 | CABP1     | 0.02 | 0.00 | 0.10 | 0.19  |
| 9479 | MAPK8IP1  | 0.04 | 0.00 | 0.05 | -0.08 |
| 9480 | ONECUT2   | 0.00 | 0.00 | 0.15 | 0.08  |
| 9482 | STX8      | 0.02 | 0.00 | 0.00 | 0.32  |
| 9487 | PIGL      | 0.00 | 0.00 | 0.00 | NaN   |
| 9488 | PIGB      | 0.00 | 0.00 | 0.00 | NaN   |
| 9489 | PGS1      | 0.02 | 0.14 | 0.00 | -0.05 |
| 9491 | PSMF1     | 0.00 | 0.00 | 0.00 | NaN   |
| 9495 | AKAP5     | 0.06 | 0.00 | 0.00 | 0.01  |



|      |          |      |      |      |       |
|------|----------|------|------|------|-------|
| 9496 | TBX4     | 0.10 | 0.00 | 0.05 | 0.24  |
| 9497 | SLC4A7   | 0.02 | 0.00 | 0.05 | 0.13  |
| 9498 | SLC4A8   | 0.00 | 0.00 | 0.00 | NaN   |
| 9501 | RPH3AL   | 0.18 | 0.00 | 0.10 | 0.22  |
| 9508 | ADAMTS3  | 0.02 | 0.00 | 0.05 | -0.07 |
| 9509 | ADAMTS2  | 0.08 | 0.43 | 0.10 | 0.31  |
| 9512 | PMPCB    | 0.00 | 0.00 | 0.00 | NaN   |
| 9513 | FXR2     | 0.02 | 0.00 | 0.00 | -0.07 |
| 9517 | SPTLC2   | 0.00 | 0.00 | 0.00 | NaN   |
| 9519 | TBPL1    | 0.00 | 0.00 | 0.00 | NaN   |
| 9520 | NPEPPS   | 0.00 | 0.00 | 0.00 | NaN   |
| 9521 | EEF1E1   | 0.00 | 0.00 | 0.00 | NaN   |
| 9522 | SCAMP1   | 0.00 | 0.00 | 0.00 | NaN   |
| 9524 | GPSN2    | 0.00 | 0.00 | 0.05 | -0.19 |
| 9526 | MPDU1    | 0.02 | 0.00 | 0.00 | -0.15 |
| 9527 | GOSR1    | 0.10 | 0.00 | 0.05 | 0.06  |
| 9529 | BAG5     | 0.00 | 0.00 | 0.05 | 0.03  |
| 9530 | BAG4     | 0.08 | 0.00 | 0.00 | 0.67  |
| 9531 | BAG3     | 0.04 | 0.00 | 0.10 | -0.06 |
| 9532 | BAG2     | 0.06 | 0.14 | 0.05 | 0.02  |
| 9534 | ZNF254   | 0.12 | 0.00 | 0.15 | -0.15 |
| 9535 | GMFG     | 0.06 | 0.00 | 0.05 | 0.16  |
| 9536 | PTGES    | 0.00 | 0.00 | 0.00 | NaN   |
| 9541 | CIR      | 0.00 | 0.00 | 0.00 | NaN   |
| 9542 | NRG2     | 0.00 | 0.00 | 0.00 | NaN   |
| 9545 | RAB3D    | 0.02 | 0.00 | 0.00 | -0.12 |
| 9546 | APBA3    | 0.02 | 0.00 | 0.15 | -0.12 |
| 9550 | ATP6V1G1 | 0.02 | 0.00 | 0.00 | 0.04  |
| 9551 | ATP5J2   | 0.02 | 0.00 | 0.00 | 0.02  |
| 9552 | SPAG7    | 0.04 | 0.00 | 0.10 | -0.04 |
| 9553 | MRPL33   | 0.00 | 0.00 | 0.00 | NaN   |
| 9555 | H2AFY    | 0.02 | 0.00 | 0.00 | 0.15  |
| 9556 | C14orf2  | 0.02 | 0.00 | 0.10 | 0.05  |
| 9557 | CHD1L    | 0.02 | 0.00 | 0.00 | -0.01 |
| 9562 | MINPP1   | 0.00 | 0.00 | 0.05 | 0.03  |
| 9563 | H6PD     | 0.00 | 0.00 | 0.00 | NaN   |
| 9567 | GTPBP1   | 0.00 | 0.14 | 0.00 | 0.15  |
| 9569 | GTF2IRD1 | 0.00 | 0.00 | 0.00 | NaN   |
| 9570 | GOSR2    | 0.00 | 0.00 | 0.00 | NaN   |
| 9572 | NR1D1    | 0.02 | 0.86 | 0.05 | 0.29  |
| 9573 | GDF3     | 0.02 | 0.00 | 0.15 | -0.15 |
| 9575 | CLOCK    | 0.00 | 0.00 | 0.10 | -0.10 |
| 9576 | SPAG6    | 0.00 | 0.00 | 0.00 | NaN   |
| 9577 | BRE      | 0.00 | 0.00 | 0.00 | NaN   |
| 9578 | CDC42BPB | 0.00 | 0.00 | 0.05 | -0.08 |
| 9580 | SOX13    | 0.00 | 0.00 | 0.15 | -0.12 |
| 9589 | WTAP     | 0.04 | 0.00 | 0.05 | 0.04  |

|      |          |      |      |      |       |
|------|----------|------|------|------|-------|
| 9590 | AKAP12   | 0.02 | 0.00 | 0.05 | 0.05  |
| 9603 | NFE2L3   | 0.00 | 0.00 | 0.00 | NaN   |
| 9604 | RNF14    | 0.00 | 0.00 | 0.00 | NaN   |
| 9605 | C16orf7  | 0.00 | 0.00 | 0.10 | 0.36  |
| 9609 | RAB36    | 0.06 | 0.14 | 0.15 | -0.07 |
| 9610 | RIN1     | 0.04 | 0.00 | 0.05 | 0.17  |
| 9611 | NCOR1    | 0.00 | 0.00 | 0.00 | NaN   |
| 9612 | NCOR2    | 0.02 | 0.00 | 0.10 | 0.10  |
| 9616 | RNF7     | 0.02 | 0.00 | 0.00 | 0.04  |
| 9617 | MTRF1    | 0.00 | 0.00 | 0.00 | NaN   |
| 9618 | TRAF4    | 0.10 | 0.00 | 0.05 | 0.28  |
| 9619 | ABCG1    | 0.00 | 0.00 | 0.00 | NaN   |
| 9620 | CELSR1   | 0.02 | 0.14 | 0.05 | 0.17  |
| 9623 | TCL1B    | 0.00 | 0.00 | 0.05 | -0.10 |
| 9625 | AATK     | 0.00 | 0.14 | 0.00 | 0.10  |
| 9627 | SNCAIP   | 0.00 | 0.00 | 0.00 | NaN   |
| 9628 | RGS6     | 0.02 | 0.00 | 0.05 | 0.23  |
| 9630 | GNA14    | 0.00 | 0.00 | 0.05 | -0.08 |
| 9631 | NUP155   | 0.04 | 0.00 | 0.15 | 0.04  |
| 9632 | SEC24C   | 0.02 | 0.00 | 0.00 | 0.16  |
| 9633 | MTL5     | 0.02 | 0.00 | 0.05 | 0.19  |
| 9635 | CLCA2    | 0.04 | 0.00 | 0.05 | -0.07 |
| 9637 | FEZ2     | 0.00 | 0.00 | 0.00 | NaN   |
| 9638 | FEZ1     | 0.02 | 0.00 | 0.00 | 0.14  |
| 9639 | ARHGEF10 | 0.00 | 0.00 | 0.00 | NaN   |
| 9653 | HS2ST1   | 0.04 | 0.00 | 0.05 | 0.13  |
| 9655 | SOCS5    | 0.00 | 0.00 | 0.00 | NaN   |
| 9659 | PDE4DIP  | 0.02 | 0.00 | 0.00 | -0.02 |
| 9663 | LPIN2    | 0.02 | 0.00 | 0.00 | 0.06  |
| 9672 | SDC3     | 0.00 | 0.14 | 0.00 | -0.05 |
| 9674 | KIAA0040 | 0.02 | 0.00 | 0.10 | 0.08  |
| 9675 | KIAA0406 | 0.02 | 0.00 | 0.00 | 0.20  |
| 9683 | N4BP1    | 0.43 | 0.29 | 0.15 | -0.29 |
| 9692 | KIAA0391 | 0.04 | 0.00 | 0.00 | 0.01  |
| 9698 | PUM1     | 0.00 | 0.14 | 0.00 | -0.03 |
| 9700 | ESPL1    | 0.00 | 0.00 | 0.00 | NaN   |
| 9703 | KIAA0100 | 0.10 | 0.00 | 0.05 | 0.16  |
| 9706 | ULK2     | 0.10 | 0.00 | 0.05 | -0.08 |
| 9708 | PCDHGA8  | 0.00 | 0.00 | 0.00 | NaN   |
| 9709 | HERPUD1  | 0.00 | 0.14 | 0.00 | -0.19 |
| 9710 | KIAA0355 | 0.00 | 0.00 | 0.00 | NaN   |
| 9711 | KIAA0226 | 0.20 | 0.14 | 0.10 | 0.01  |
| 9718 | ECE2     | 0.02 | 0.14 | 0.00 | -0.07 |
| 9723 | SEMA3E   | 0.04 | 0.00 | 0.05 | 0.00  |
| 9729 | KIAA0408 | 0.00 | 0.00 | 0.10 | -0.12 |
| 9733 | SART3    | 0.02 | 0.00 | 0.00 | 0.15  |
| 9735 | KNTC1    | 0.02 | 0.00 | 0.10 | 0.29  |

|      |           |      |      |      |       |
|------|-----------|------|------|------|-------|
| 9741 | LAPTM4A   | 0.00 | 0.00 | 0.00 | NaN   |
| 9746 | CLSTN3    | 0.02 | 0.00 | 0.15 | -0.03 |
| 9748 | SLK       | 0.02 | 0.00 | 0.00 | 0.01  |
| 9751 | SNPH      | 0.00 | 0.00 | 0.00 | NaN   |
| 9752 | PCDHA9    | 0.00 | 0.00 | 0.00 | NaN   |
| 9757 | MLL4      | 0.00 | 0.00 | 0.00 | NaN   |
| 9759 | HDAC4     | 0.08 | 0.43 | 0.10 | -0.13 |
| 9760 | TOX       | 0.04 | 0.00 | 0.00 | 0.03  |
| 9764 | KIAA0513  | 0.00 | 0.00 | 0.00 | NaN   |
| 9766 | KIAA0247  | 0.02 | 0.00 | 0.05 | -0.04 |
| 9768 | KIAA0101  | 0.02 | 0.00 | 0.00 | 0.27  |
| 9770 | RASSF2    | 0.00 | 0.00 | 0.10 | 0.08  |
| 9772 | KIAA0195  | 0.02 | 0.14 | 0.00 | 0.53  |
| 9776 | KIAA0652  | 0.02 | 0.00 | 0.00 | 0.26  |
| 9778 | KIAA0232  | 0.00 | 0.00 | 0.00 | NaN   |
| 9782 | MATR3     | 0.00 | 0.00 | 0.00 | NaN   |
| 9784 | SNX17     | 0.00 | 0.00 | 0.00 | NaN   |
| 9786 | KIAA0586  | 0.02 | 0.14 | 0.00 | 0.14  |
| 9791 | PTDSS1    | 0.08 | 0.00 | 0.05 | 0.32  |
| 9794 | MAML1     | 0.08 | 0.43 | 0.10 | 0.15  |
| 9796 | PHYHIP    | 0.00 | 0.00 | 0.05 | 0.16  |
| 9798 | KIAA0174  | 0.00 | 0.00 | 0.05 | -0.14 |
| 9801 | MRPL19    | 0.00 | 0.00 | 0.00 | NaN   |
| 9802 | DAZAP2    | 0.00 | 0.00 | 0.00 | NaN   |
| 9808 | KIAA0087  | 0.00 | 0.00 | 0.00 | NaN   |
| 9810 | RNF40     | 0.02 | 0.00 | 0.00 | -0.07 |
| 9811 | KIAA0427  | 0.00 | 0.00 | 0.00 | NaN   |
| 9812 | KIAA0141  | 0.00 | 0.00 | 0.00 | NaN   |
| 9813 | KIAA0494  | 0.02 | 0.00 | 0.05 | 0.00  |
| 9815 | GIT2      | 0.02 | 0.00 | 0.00 | -0.14 |
| 9817 | KEAP1     | 0.02 | 0.00 | 0.15 | 0.06  |
| 9821 | RB1CC1    | 0.00 | 0.14 | 0.00 | 0.18  |
| 9824 | ARHGAP11A | 0.00 | 0.00 | 0.00 | NaN   |
| 9825 | SPATA2    | 0.06 | 0.00 | 0.00 | 0.66  |
| 9826 | ARHGEF11  | 0.04 | 0.14 | 0.05 | 0.10  |
| 9829 | DNAJC6    | 0.02 | 0.00 | 0.15 | 0.14  |
| 9830 | TRIM14    | 0.04 | 0.00 | 0.00 | -0.11 |
| 9833 | MELK      | 0.04 | 0.00 | 0.00 | 0.03  |
| 9840 | KIAA0748  | 0.02 | 0.00 | 0.05 | 0.08  |
| 9844 | ELMO1     | 0.02 | 0.00 | 0.00 | 0.06  |
| 9846 | GAB2      | 0.02 | 0.00 | 0.00 | 0.51  |
| 9847 | KIAA0528  | 0.06 | 0.00 | 0.00 | -0.25 |
| 9851 | KIAA0753  | 0.04 | 0.00 | 0.10 | -0.19 |
| 9856 | KIAA0319  | 0.00 | 0.00 | 0.00 | NaN   |
| 9865 | KIAA0644  | 0.00 | 0.00 | 0.00 | NaN   |
| 9868 | TOMM70A   | 0.00 | 0.00 | 0.15 | 0.12  |
| 9869 | SETDB1    | 0.02 | 0.00 | 0.10 | 0.11  |

|      |          |      |      |      |       |
|------|----------|------|------|------|-------|
| 9870 | KIAA0317 | 0.02 | 0.00 | 0.05 | 0.06  |
| 9871 | SEC24D   | 0.02 | 0.00 | 0.05 | 0.29  |
| 9874 | TLK1     | 0.00 | 0.00 | 0.00 | NaN   |
| 9885 | OSBPL2   | 0.08 | 0.00 | 0.05 | 0.22  |
| 9892 | SNAP91   | 0.10 | 0.00 | 0.20 | -0.05 |
| 9897 | KIAA0196 | 0.10 | 0.00 | 0.05 | 0.32  |
| 9899 | SV2B     | 0.02 | 0.00 | 0.10 | 0.36  |
| 9901 | SRGAP3   | 0.00 | 0.00 | 0.10 | 0.07  |
| 9907 | KIAA0415 | 0.00 | 0.00 | 0.00 | NaN   |
| 9908 | G3BP2    | 0.00 | 0.00 | 0.00 | NaN   |
| 9915 | ARNT2    | 0.02 | 0.00 | 0.00 | 0.00  |
| 9921 | RNF10    | 0.02 | 0.00 | 0.10 | 0.06  |
| 9927 | MFN2     | 0.02 | 0.00 | 0.00 | 0.07  |
| 9931 | HELZ     | 0.12 | 0.00 | 0.20 | 0.16  |
| 9933 | KIAA0020 | 0.02 | 0.00 | 0.00 | -0.11 |
| 9935 | MAFB     | 0.04 | 0.00 | 0.00 | -0.09 |
| 9937 | DCLRE1A  | 0.00 | 0.00 | 0.00 | NaN   |
| 9939 | RBM8A    | 0.02 | 0.00 | 0.00 | 0.16  |
| 9940 | DLEC1    | 0.00 | 0.00 | 0.15 | 0.22  |
| 9942 | XYLB     | 0.02 | 0.00 | 0.05 | 0.01  |
| 9943 | OSR1     | 0.00 | 0.00 | 0.00 | NaN   |
| 9946 | CRYZL1   | 0.00 | 0.00 | 0.00 | NaN   |
| 9948 | WDR1     | 0.02 | 0.00 | 0.00 | -0.04 |
| 9950 | GOLGA5   | 0.02 | 0.00 | 0.00 | -0.21 |
| 9953 | HS3ST3B1 | 0.04 | 0.00 | 0.00 | -0.02 |
| 9955 | HS3ST3A1 | 0.04 | 0.00 | 0.00 | -0.01 |
| 9956 | HS3ST2   | 0.02 | 0.14 | 0.00 | -0.08 |
| 9957 | HS3ST1   | 0.04 | 0.14 | 0.10 | 0.19  |
| 9958 | USP15    | 0.02 | 0.00 | 0.05 | 0.00  |
| 9961 | MVP      | 0.06 | 0.14 | 0.00 | 0.08  |
| 9962 | SLC23A1  | 0.00 | 0.00 | 0.00 | NaN   |
| 9966 | TNFSF15  | 0.02 | 0.00 | 0.00 | -0.06 |
| 9970 | NR1I3    | 0.00 | 0.00 | 0.00 | NaN   |
| 9971 | NR1H4    | 0.00 | 0.00 | 0.00 | NaN   |
| 9972 | NUP153   | 0.04 | 0.00 | 0.10 | -0.05 |
| 9973 | CCS      | 0.04 | 0.00 | 0.05 | 0.09  |
| 9978 | RBX1     | 0.00 | 0.14 | 0.00 | 0.07  |
| 9985 | REC8     | 0.02 | 0.14 | 0.10 | -0.09 |
| 9986 | RCE1     | 0.04 | 0.00 | 0.05 | 0.48  |
| 9987 | HNRPDL   | 0.00 | 0.00 | 0.10 | 0.13  |
| 9988 | DMTF1    | 0.00 | 0.00 | 0.00 | NaN   |
| 9989 | PPP4R1   | 0.02 | 0.00 | 0.00 | 0.09  |
| 9990 | SLC12A6  | 0.04 | 0.00 | 0.05 | 0.21  |
| 9991 | ROD1     | 0.02 | 0.00 | 0.00 | 0.01  |
| 9992 | KCNE2    | 0.02 | 0.00 | 0.05 | -0.04 |
| 9993 | DGCR2    | 0.02 | 0.14 | 0.20 | 0.10  |
| 9994 | CASP8AP2 | 0.00 | 0.00 | 0.05 | 0.23  |

|       |          |      |      |      |       |
|-------|----------|------|------|------|-------|
| 10001 | MED6     | 0.02 | 0.00 | 0.05 | -0.04 |
| 10002 | NR2E3    | 0.00 | 0.00 | 0.00 | NaN   |
| 10003 | NAALAD2  | 0.00 | 0.00 | 0.00 | NaN   |
| 10010 | TANK     | 0.02 | 0.00 | 0.00 | -0.01 |
| 10014 | HDAC5    | 0.00 | 0.00 | 0.00 | NaN   |
| 10015 | PDCD6IP  | 0.06 | 0.00 | 0.05 | 0.04  |
| 10016 | PDCD6    | 0.00 | 0.00 | 0.00 | NaN   |
| 10017 | BCL2L10  | 0.00 | 0.00 | 0.00 | NaN   |
| 10018 | BCL2L11  | 0.02 | 0.00 | 0.00 | 0.19  |
| 10020 | GNE      | 0.04 | 0.00 | 0.00 | -0.04 |
| 10021 | HCN4     | 0.00 | 0.00 | 0.05 | -0.05 |
| 10022 | INSL5    | 0.02 | 0.00 | 0.15 | -0.02 |
| 10023 | FRAT1    | 0.00 | 0.00 | 0.05 | -0.14 |
| 10024 | TROAP    | 0.00 | 0.00 | 0.00 | NaN   |
| 10026 | PIGK     | 0.06 | 0.00 | 0.00 | 0.00  |
| 10036 | CHAF1A   | 0.02 | 0.00 | 0.15 | 0.08  |
| 10040 | TOM1L1   | 0.02 | 0.00 | 0.10 | 0.07  |
| 10043 | TOM1     | 0.00 | 0.29 | 0.05 | -0.06 |
| 10045 | SH2D3A   | 0.02 | 0.00 | 0.15 | 0.07  |
| 10047 | CST8     | 0.00 | 0.00 | 0.00 | NaN   |
| 10048 | RANBP9   | 0.02 | 0.00 | 0.00 | 0.08  |
| 10049 | DNAJB6   | 0.00 | 0.00 | 0.05 | -0.01 |
| 10050 | SLC17A4  | 0.02 | 0.00 | 0.05 | -0.05 |
| 10053 | AP1M2    | 0.02 | 0.00 | 0.15 | 0.05  |
| 10054 | UBA2     | 0.00 | 0.00 | 0.00 | NaN   |
| 10057 | ABCC5    | 0.00 | 0.00 | 0.10 | -0.04 |
| 10058 | ABCB6    | 0.04 | 0.00 | 0.00 | 0.15  |
| 10059 | DNM1L    | 0.02 | 0.00 | 0.00 | 0.09  |
| 10060 | ABCC9    | 0.02 | 0.00 | 0.05 | 0.06  |
| 10061 | ABCF2    | 0.02 | 0.00 | 0.00 | 0.08  |
| 10062 | NR1H3    | 0.02 | 0.00 | 0.00 | -0.08 |
| 10063 | COX17    | 0.00 | 0.00 | 0.10 | -0.13 |
| 10066 | SCAMP2   | 0.00 | 0.00 | 0.05 | -0.12 |
| 10067 | SCAMP3   | 0.04 | 0.00 | 0.15 | 0.09  |
| 10068 | IL18BP   | 0.06 | 0.00 | 0.15 | -0.11 |
| 10072 | DPP3     | 0.04 | 0.00 | 0.05 | -0.10 |
| 10076 | PTPRU    | 0.04 | 0.00 | 0.00 | 0.22  |
| 10078 | TSSC4    | 0.00 | 0.00 | 0.00 | NaN   |
| 10079 | ATP9A    | 0.08 | 0.00 | 0.00 | 0.08  |
| 10086 | HHLA1    | 0.06 | 0.00 | 0.00 | 0.00  |
| 10087 | COL4A3BP | 0.04 | 0.00 | 0.05 | 0.10  |
| 10089 | KCNK7    | 0.04 | 0.00 | 0.05 | -0.04 |
| 10090 | UST      | 0.02 | 0.00 | 0.05 | -0.03 |
| 10092 | ARPC5    | 0.02 | 0.00 | 0.00 | 0.02  |
| 10093 | ARPC4    | 0.00 | 0.00 | 0.10 | 0.11  |
| 10094 | ARPC3    | 0.02 | 0.00 | 0.00 | -0.08 |
| 10095 | ARPC1B   | 0.02 | 0.00 | 0.00 | -0.04 |

|       |           |      |      |      |       |
|-------|-----------|------|------|------|-------|
| 10096 | ACTR3     | 0.00 | 0.00 | 0.10 | 0.05  |
| 10097 | ACTR2     | 0.00 | 0.00 | 0.00 | NaN   |
| 10101 | NUBP2     | 0.18 | 0.00 | 0.10 | -0.06 |
| 10102 | TSFM      | 0.02 | 0.00 | 0.00 | 0.00  |
| 10105 | PPIF      | 0.02 | 0.00 | 0.10 | 0.22  |
| 10107 | TRIM10    | 0.04 | 0.14 | 0.05 | 0.20  |
| 10109 | ARPC2     | 0.04 | 0.00 | 0.00 | 0.01  |
| 10110 | SGK2      | 0.02 | 0.00 | 0.00 | 0.21  |
| 10111 | RAD50     | 0.02 | 0.14 | 0.00 | -0.02 |
| 10113 | PREB      | 0.00 | 0.00 | 0.00 | NaN   |
| 10114 | HIPK3     | 0.02 | 0.00 | 0.00 | 0.22  |
| 10116 | FEM1B     | 0.00 | 0.00 | 0.15 | 0.15  |
| 10120 | ACTR1B    | 0.00 | 0.00 | 0.10 | 0.28  |
| 10121 | ACTR1A    | 0.02 | 0.00 | 0.00 | -0.18 |
| 10125 | RASGRP1   | 0.04 | 0.00 | 0.05 | 0.10  |
| 10126 | DNAL4     | 0.00 | 0.14 | 0.00 | -0.22 |
| 10127 | ZNF263    | 0.02 | 0.00 | 0.00 | 0.05  |
| 10128 | LRPPRC    | 0.02 | 0.00 | 0.05 | -0.23 |
| 10131 | TRAP1     | 0.02 | 0.00 | 0.00 | -0.07 |
| 10133 | OPTN      | 0.00 | 0.14 | 0.00 | 0.19  |
| 10136 | ELA3A     | 0.00 | 0.00 | 0.05 | 0.09  |
| 10137 | RBM12     | 0.06 | 0.14 | 0.05 | 0.04  |
| 10138 | YAF2      | 0.00 | 0.00 | 0.35 | -0.21 |
| 10140 | TOB1      | 0.10 | 0.00 | 0.10 | 0.07  |
| 10141 | C4orf6    | 0.00 | 0.00 | 0.00 | NaN   |
| 10142 | AKAP9     | 0.00 | 0.00 | 0.00 | NaN   |
| 10148 | EBI3      | 0.02 | 0.00 | 0.15 | -0.07 |
| 10154 | PLXNC1    | 0.00 | 0.00 | 0.00 | NaN   |
| 10155 | TRIM28    | 0.00 | 0.00 | 0.00 | NaN   |
| 10157 | AASS      | 0.00 | 0.00 | 0.00 | NaN   |
| 10160 | FARP1     | 0.00 | 0.00 | 0.05 | 0.10  |
| 10164 | CHST4     | 0.00 | 0.00 | 0.05 | -0.05 |
| 10165 | SLC25A13  | 0.04 | 0.14 | 0.05 | 0.09  |
| 10166 | SLC25A15  | 0.00 | 0.00 | 0.00 | NaN   |
| 10168 | ZNF197    | 0.04 | 0.00 | 0.10 | -0.01 |
| 10169 | SERF2     | 0.04 | 0.00 | 0.00 | -0.15 |
| 10179 | RBM7      | 0.00 | 0.00 | 0.00 | NaN   |
| 10180 | RBM6      | 0.06 | 0.00 | 0.05 | -0.07 |
| 10181 | RBM5      | 0.00 | 0.00 | 0.05 | 0.05  |
| 10184 | LHFPL2    | 0.00 | 0.00 | 0.00 | NaN   |
| 10186 | LHFP      | 0.00 | 0.00 | 0.00 | NaN   |
| 10196 | PRMT3     | 0.02 | 0.00 | 0.00 | 0.01  |
| 10197 | PSME3     | 0.02 | 0.86 | 0.05 | 0.01  |
| 10198 | MPHOSPH9  | 0.02 | 0.00 | 0.10 | 0.29  |
| 10199 | MPHOSPH10 | 0.00 | 0.00 | 0.05 | -0.12 |
| 10200 | MPHOSPH6  | 0.02 | 0.00 | 0.00 | -0.20 |
| 10202 | DHRS2     | 0.02 | 0.14 | 0.10 | -0.15 |

|       |          |      |      |      |       |
|-------|----------|------|------|------|-------|
| 10203 | CALCRL   | 0.00 | 0.00 | 0.05 | 0.01  |
| 10207 | INADL    | 0.04 | 0.00 | 0.00 | 0.60  |
| 10211 | FLOT1    | 0.04 | 0.14 | 0.05 | 0.15  |
| 10212 | DDX39    | 0.00 | 0.00 | 0.05 | 0.03  |
| 10215 | OLIG2    | 0.00 | 0.00 | 0.00 | NaN   |
| 10216 | PRG4     | 0.00 | 0.00 | 0.05 | -0.06 |
| 10219 | KLRG1    | 0.02 | 0.00 | 0.15 | 0.00  |
| 10220 | GDF11    | 0.02 | 0.00 | 0.05 | 0.37  |
| 10223 | GPA33    | 0.00 | 0.00 | 0.00 | NaN   |
| 10228 | STX6     | 0.04 | 0.00 | 0.10 | 0.03  |
| 10229 | COQ7     | 0.00 | 0.00 | 0.00 | NaN   |
| 10230 | NBR2     | 0.00 | 0.86 | 0.00 | -0.04 |
| 10232 | MSLN     | 0.18 | 0.00 | 0.10 | -0.05 |
| 10235 | RASGRP2  | 0.02 | 0.00 | 0.00 | -0.02 |
| 10239 | AP3S2    | 0.00 | 0.00 | 0.00 | NaN   |
| 10240 | MRPS31   | 0.00 | 0.00 | 0.00 | NaN   |
| 10242 | KCNMB2   | 0.06 | 0.00 | 0.00 | -0.09 |
| 10243 | GPHN     | 0.00 | 0.00 | 0.05 | 0.00  |
| 10246 | SLC17A2  | 0.02 | 0.00 | 0.05 | -0.11 |
| 10249 | GLYAT    | 0.02 | 0.00 | 0.00 | 0.19  |
| 10250 | SRRM1    | 0.02 | 0.00 | 0.05 | 0.04  |
| 10252 | SPRY1    | 0.02 | 0.00 | 0.00 | 0.29  |
| 10253 | SPRY2    | 0.02 | 0.00 | 0.00 | -0.11 |
| 10254 | STAM2    | 0.00 | 0.00 | 0.00 | NaN   |
| 10257 | ABCC4    | 0.04 | 0.00 | 0.00 | -0.06 |
| 10261 | IGSF6    | 0.02 | 0.14 | 0.00 | -0.13 |
| 10262 | SF3B4    | 0.02 | 0.00 | 0.00 | -0.04 |
| 10265 | IRX5     | 0.02 | 0.00 | 0.00 | 0.07  |
| 10266 | RAMP2    | 0.02 | 0.86 | 0.05 | -0.09 |
| 10267 | RAMP1    | 0.08 | 0.43 | 0.10 | 0.16  |
| 10268 | RAMP3    | 0.02 | 0.00 | 0.00 | 0.04  |
| 10269 | ZMPSTE24 | 0.02 | 0.00 | 0.05 | -0.29 |
| 10270 | AKAP8    | 0.04 | 0.00 | 0.00 | -0.18 |
| 10272 | FSTL3    | 0.06 | 0.00 | 0.15 | -0.20 |
| 10273 | STUB1    | 0.18 | 0.00 | 0.10 | -0.02 |
| 10274 | STAG1    | 0.02 | 0.14 | 0.00 | 0.17  |
| 10276 | NET1     | 0.00 | 0.00 | 0.00 | NaN   |
| 10277 | UBE4B    | 0.00 | 0.00 | 0.00 | NaN   |
| 10279 | PRSS16   | 0.00 | 0.14 | 0.00 | -0.01 |
| 10281 | DSCR4    | 0.00 | 0.00 | 0.00 | NaN   |
| 10282 | BET1     | 0.02 | 0.00 | 0.00 | -0.05 |
| 10284 | SAP18    | 0.18 | 0.00 | 0.20 | 0.11  |
| 10286 | BCAS2    | 0.04 | 0.00 | 0.05 | 0.40  |
| 10287 | RGS19    | 0.08 | 0.00 | 0.05 | 0.07  |
| 10288 | LILRB2   | 0.02 | 0.00 | 0.05 | 0.11  |
| 10291 | SF3A1    | 0.00 | 0.29 | 0.05 | -0.05 |
| 10294 | DNAJA2   | 0.43 | 0.29 | 0.15 | -0.41 |

|       |         |      |      |      |       |
|-------|---------|------|------|------|-------|
| 10295 | BCKDK   | 0.02 | 0.00 | 0.00 | -0.09 |
| 10296 | MAEA    | 0.02 | 0.00 | 0.00 | 0.09  |
| 10298 | PAK4    | 0.06 | 0.00 | 0.05 | 0.06  |
| 10300 | KATNB1  | 0.02 | 0.00 | 0.00 | 0.29  |
| 10301 | DLEU1   | 0.04 | 0.00 | 0.00 | -0.15 |
| 10302 | SNAPC5  | 0.04 | 0.00 | 0.00 | 0.07  |
| 10308 | ZNF267  | 0.43 | 0.29 | 0.15 | 0.06  |
| 10311 | DSCR3   | 0.00 | 0.00 | 0.00 | NaN   |
| 10312 | TCIRG1  | 0.04 | 0.00 | 0.05 | -0.04 |
| 10313 | RTN3    | 0.02 | 0.00 | 0.00 | -0.23 |
| 10314 | LANCL1  | 0.02 | 0.00 | 0.05 | -0.20 |
| 10317 | B3GALT5 | 0.00 | 0.00 | 0.00 | NaN   |
| 10318 | NAF1    | 0.00 | 0.00 | 0.05 | 0.00  |
| 10319 | LAMC3   | 0.04 | 0.00 | 0.00 | -0.10 |
| 10326 | SIRPB1  | 0.00 | 0.00 | 0.00 | NaN   |
| 10327 | AKR1A1  | 0.02 | 0.00 | 0.05 | 0.18  |
| 10329 | TMEM5   | 0.04 | 0.00 | 0.00 | 0.26  |
| 10331 | B3GNT3  | 0.04 | 0.00 | 0.00 | 0.22  |
| 10333 | TLR6    | 0.04 | 0.00 | 0.10 | -0.04 |
| 10342 | TFG     | 0.00 | 0.00 | 0.15 | 0.14  |
| 10343 | PKDREJ  | 0.02 | 0.14 | 0.05 | -0.06 |
| 10346 | TRIM22  | 0.02 | 0.00 | 0.00 | -0.02 |
| 10347 | ABCA7   | 0.02 | 0.00 | 0.05 | -0.14 |
| 10351 | ABCA8   | 0.12 | 0.00 | 0.20 | -0.03 |
| 10352 | WARS2   | 0.12 | 0.00 | 0.05 | -0.01 |
| 10360 | NPM3    | 0.02 | 0.00 | 0.00 | -0.12 |
| 10362 | HMG20B  | 0.02 | 0.00 | 0.15 | -0.10 |
| 10363 | HMG20A  | 0.00 | 0.00 | 0.05 | 0.06  |
| 10365 | KLF2    | 0.04 | 0.00 | 0.00 | -0.01 |
| 10367 | CBARA1  | 0.04 | 0.00 | 0.05 | 0.11  |
| 10368 | CACNG3  | 0.06 | 0.14 | 0.00 | -0.02 |
| 10369 | CACNG2  | 0.00 | 0.14 | 0.00 | -0.01 |
| 10370 | CITED2  | 0.02 | 0.00 | 0.05 | -0.03 |
| 10371 | SEMA3A  | 0.04 | 0.00 | 0.05 | -0.03 |
| 10380 | BPNT1   | 0.02 | 0.00 | 0.00 | -0.03 |
| 10381 | TUBB4   | 0.02 | 0.00 | 0.15 | -0.14 |
| 10384 | BTN3A3  | 0.00 | 0.14 | 0.00 | 0.07  |
| 10385 | BTN2A2  | 0.00 | 0.14 | 0.00 | -0.07 |
| 10388 | SYCP2   | 0.12 | 0.00 | 0.00 | 0.08  |
| 10390 | CEPT1   | 0.06 | 0.14 | 0.00 | -0.14 |
| 10391 | CORO2B  | 0.00 | 0.00 | 0.15 | 0.00  |
| 10394 | PRG3    | 0.00 | 0.00 | 0.00 | NaN   |
| 10395 | DLC1    | 0.00 | 0.00 | 0.00 | NaN   |
| 10396 | ATP8A1  | 0.02 | 0.00 | 0.10 | -0.04 |
| 10397 | NDRG1   | 0.06 | 0.00 | 0.00 | 0.13  |
| 10398 | MYL9    | 0.04 | 0.00 | 0.00 | 0.00  |
| 10400 | PEMT    | 0.02 | 0.00 | 0.00 | -0.02 |



|       |           |      |      |      |       |
|-------|-----------|------|------|------|-------|
| 10401 | PIAS3     | 0.02 | 0.00 | 0.00 | 0.02  |
| 10404 | PGCP      | 0.08 | 0.00 | 0.05 | 0.19  |
| 10406 | WFDC2     | 0.04 | 0.00 | 0.05 | 0.17  |
| 10409 | BASP1     | 0.02 | 0.00 | 0.00 | 0.08  |
| 10410 | IFITM3    | 0.06 | 0.29 | 0.10 | -0.07 |
| 10413 | YAP1      | 0.00 | 0.00 | 0.00 | NaN   |
| 10417 | SPON2     | 0.02 | 0.00 | 0.00 | 0.09  |
| 10418 | SPON1     | 0.00 | 0.00 | 0.00 | NaN   |
| 10420 | TESK2     | 0.02 | 0.00 | 0.05 | 0.27  |
| 10421 | CD2BP2    | 0.02 | 0.00 | 0.00 | -0.01 |
| 10423 | CDIPT     | 0.06 | 0.14 | 0.00 | -0.07 |
| 10424 | PGRMC2    | 0.00 | 0.00 | 0.05 | 0.11  |
| 10425 | ARIH2     | 0.00 | 0.00 | 0.05 | 0.32  |
| 10427 | SEC24B    | 0.08 | 0.00 | 0.00 | 0.11  |
| 10428 | CFDP1     | 0.00 | 0.00 | 0.00 | NaN   |
| 10431 | TIMM23    | 0.02 | 0.00 | 0.05 | 0.08  |
| 10432 | RBM14     | 0.04 | 0.00 | 0.05 | -0.03 |
| 10434 | LYPLA1    | 0.00 | 0.00 | 0.00 | NaN   |
| 10437 | IFI30     | 0.02 | 0.00 | 0.00 | 0.09  |
| 10438 | C1D       | 0.00 | 0.00 | 0.00 | NaN   |
| 10440 | TIMM17A   | 0.02 | 0.00 | 0.00 | 0.10  |
| 10445 | MCRS1     | 0.02 | 0.00 | 0.00 | 0.28  |
| 10449 | ACAA2     | 0.00 | 0.00 | 0.00 | NaN   |
| 10450 | PPIE      | 0.02 | 0.00 | 0.05 | 0.05  |
| 10451 | VAV3      | 0.06 | 0.00 | 0.20 | -0.10 |
| 10452 | TOMM40    | 0.00 | 0.00 | 0.00 | NaN   |
| 10454 | MAP3K7IP1 | 0.00 | 0.14 | 0.05 | 0.05  |
| 10456 | HAX1      | 0.04 | 0.00 | 0.15 | 0.07  |
| 10457 | GPNMB     | 0.00 | 0.00 | 0.10 | 0.09  |
| 10458 | BAIAP2    | 0.00 | 0.14 | 0.00 | -0.01 |
| 10460 | TACC3     | 0.02 | 0.00 | 0.00 | -0.09 |
| 10461 | MERTK     | 0.02 | 0.00 | 0.00 | -0.06 |
| 10464 | PIBF1     | 0.00 | 0.00 | 0.00 | NaN   |
| 10465 | PPIH      | 0.02 | 0.00 | 0.05 | 0.34  |
| 10466 | COG5      | 0.00 | 0.00 | 0.00 | NaN   |
| 10468 | FST       | 0.18 | 0.00 | 0.30 | 0.01  |
| 10469 | TIMM44    | 0.02 | 0.00 | 0.15 | 0.06  |
| 10474 | TADA3L    | 0.00 | 0.00 | 0.10 | 0.23  |
| 10477 | UBE2E3    | 0.00 | 0.00 | 0.00 | NaN   |
| 10478 | SLC25A17  | 0.00 | 0.14 | 0.00 | -0.05 |
| 10481 | HOXB13    | 0.04 | 0.00 | 0.05 | -0.09 |
| 10482 | NXF1      | 0.00 | 0.00 | 0.00 | NaN   |
| 10483 | SEC23B    | 0.02 | 0.00 | 0.00 | 0.20  |
| 10484 | SEC23A    | 0.04 | 0.00 | 0.00 | 0.10  |
| 10486 | CAP2      | 0.04 | 0.00 | 0.10 | -0.17 |
| 10488 | CREB3     | 0.00 | 0.00 | 0.00 | NaN   |
| 10491 | CRTAP     | 0.06 | 0.00 | 0.05 | 0.04  |

|       |         |      |      |      |       |
|-------|---------|------|------|------|-------|
| 10494 | STK25   | 0.08 | 0.43 | 0.10 | -0.20 |
| 10498 | CARM1   | 0.02 | 0.00 | 0.15 | 0.16  |
| 10499 | NCOA2   | 0.04 | 0.14 | 0.00 | 0.20  |
| 10500 | SEMA6C  | 0.02 | 0.00 | 0.10 | 0.35  |
| 10501 | SEMA6B  | 0.02 | 0.00 | 0.15 | -0.22 |
| 10505 | SEMA4F  | 0.00 | 0.00 | 0.05 | -0.01 |
| 10507 | SEMA4D  | 0.00 | 0.00 | 0.00 | NaN   |
| 10512 | SEMA3C  | 0.02 | 0.00 | 0.00 | 0.15  |
| 10513 | APPBP2  | 0.10 | 0.00 | 0.05 | 0.61  |
| 10514 | MYBBP1A | 0.04 | 0.00 | 0.10 | 0.14  |
| 10516 | FBLN5   | 0.00 | 0.00 | 0.05 | -0.17 |
| 10519 | CIB1    | 0.00 | 0.00 | 0.00 | NaN   |
| 10520 | ZNF211  | 0.00 | 0.00 | 0.00 | NaN   |
| 10521 | DDX17   | 0.00 | 0.14 | 0.00 | 0.13  |
| 10522 | DEAF1   | 0.02 | 0.00 | 0.05 | 0.02  |
| 10523 | CHERP   | 0.04 | 0.00 | 0.00 | 0.12  |
| 10529 | NEBL    | 0.02 | 0.00 | 0.00 | -0.06 |
| 10534 | SSSCA1  | 0.04 | 0.00 | 0.05 | -0.13 |
| 10537 | UBD     | 0.04 | 0.14 | 0.05 | -0.06 |
| 10538 | BATF    | 0.00 | 0.00 | 0.00 | NaN   |
| 10540 | DCTN2   | 0.02 | 0.14 | 0.00 | 0.01  |
| 10541 | ANP32B  | 0.04 | 0.00 | 0.00 | -0.10 |
| 10542 | HBXIP   | 0.06 | 0.14 | 0.00 | -0.12 |
| 10544 | PROCR   | 0.00 | 0.00 | 0.10 | -0.11 |
| 10548 | TM9SF1  | 0.02 | 0.14 | 0.10 | -0.06 |
| 10551 | AGR2    | 0.00 | 0.00 | 0.00 | NaN   |
| 10552 | ARPC1A  | 0.02 | 0.00 | 0.00 | 0.00  |
| 10553 | HTATIP2 | 0.02 | 0.00 | 0.00 | 0.22  |
| 10554 | AGPAT1  | 0.02 | 0.00 | 0.05 | 0.03  |
| 10556 | RPP30   | 0.02 | 0.00 | 0.05 | -0.27 |
| 10557 | RPP38   | 0.02 | 0.14 | 0.05 | 0.15  |
| 10558 | SPTLC1  | 0.04 | 0.00 | 0.05 | 0.30  |
| 10559 | SLC35A1 | 0.00 | 0.00 | 0.05 | -0.05 |
| 10560 | SLC19A2 | 0.02 | 0.00 | 0.00 | 0.09  |
| 10561 | IFI44   | 0.00 | 0.00 | 0.00 | NaN   |
| 10564 | ARFGEF2 | 0.04 | 0.00 | 0.00 | 0.62  |
| 10566 | AKAP3   | 0.02 | 0.00 | 0.00 | 0.06  |
| 10567 | RABAC1  | 0.00 | 0.00 | 0.05 | -0.21 |
| 10568 | SLC34A2 | 0.00 | 0.00 | 0.00 | NaN   |
| 10570 | DPYSL4  | 0.00 | 0.00 | 0.05 | 0.18  |
| 10574 | CCT7    | 0.00 | 0.00 | 0.05 | -0.12 |
| 10575 | CCT4    | 0.00 | 0.00 | 0.00 | NaN   |
| 10576 | CCT2    | 0.12 | 0.00 | 0.05 | 0.54  |
| 10577 | NPC2    | 0.02 | 0.00 | 0.05 | 0.14  |
| 10578 | GNLY    | 0.00 | 0.00 | 0.00 | NaN   |
| 10579 | TACC2   | 0.04 | 0.00 | 0.00 | 0.12  |
| 10581 | IFITM2  | 0.06 | 0.29 | 0.10 | -0.02 |

|       |         |      |      |      |       |
|-------|---------|------|------|------|-------|
| 10584 | COLEC10 | 0.10 | 0.00 | 0.15 | 0.01  |
| 10585 | POMT1   | 0.04 | 0.00 | 0.00 | -0.13 |
| 10586 | MAB21L2 | 0.02 | 0.14 | 0.10 | 0.03  |
| 10587 | TXNRD2  | 0.06 | 0.14 | 0.15 | 0.08  |
| 10588 | MTHFS   | 0.02 | 0.00 | 0.00 | 0.13  |
| 10589 | DRAP1   | 0.04 | 0.00 | 0.05 | 0.01  |
| 10590 | SCGN    | 0.02 | 0.00 | 0.05 | -0.04 |
| 10594 | PRPF8   | 0.04 | 0.00 | 0.05 | -0.11 |
| 10595 | ERN2    | 0.00 | 0.00 | 0.00 | NaN   |
| 10600 | USP16   | 0.02 | 0.00 | 0.00 | -0.07 |
| 10605 | PAIP1   | 0.18 | 0.00 | 0.30 | 0.35  |
| 10606 | PAICS   | 0.04 | 0.00 | 0.00 | 0.00  |
| 10607 | TBL3    | 0.18 | 0.00 | 0.10 | -0.17 |
| 10609 | SC65    | 0.02 | 0.86 | 0.05 | 0.19  |
| 10612 | TRIM3   | 0.00 | 0.00 | 0.00 | NaN   |
| 10618 | TGOLN2  | 0.00 | 0.00 | 0.00 | NaN   |
| 10621 | POLR3F  | 0.02 | 0.00 | 0.00 | 0.43  |
| 10626 | TRIM16  | 0.00 | 0.00 | 0.00 | NaN   |
| 10628 | TXNIP   | 0.02 | 0.00 | 0.00 | 0.24  |
| 10629 | TAF6L   | 0.00 | 0.00 | 0.00 | NaN   |
| 10632 | ATP5L   | 0.00 | 0.00 | 0.00 | NaN   |
| 10634 | GAS2L1  | 0.00 | 0.14 | 0.05 | 0.08  |
| 10636 | RGS14   | 0.00 | 0.29 | 0.00 | -0.04 |
| 10638 | SPHAR   | 0.00 | 0.00 | 0.05 | 0.03  |
| 10645 | CAMKK2  | 0.02 | 0.00 | 0.10 | 0.17  |
| 10647 | SCGB1D2 | 0.00 | 0.00 | 0.05 | -0.14 |
| 10648 | SCGB1D1 | 0.00 | 0.00 | 0.05 | 0.03  |
| 10651 | MTX2    | 0.02 | 0.00 | 0.00 | 0.22  |
| 10652 | YKT6    | 0.00 | 0.00 | 0.00 | NaN   |
| 10653 | SPINT2  | 0.00 | 0.00 | 0.00 | NaN   |
| 10654 | PMVK    | 0.04 | 0.00 | 0.15 | -0.05 |
| 10656 | KHDRBS3 | 0.06 | 0.00 | 0.00 | -0.06 |
| 10657 | KHDRBS1 | 0.00 | 0.14 | 0.05 | 0.00  |
| 10658 | CUGBP1  | 0.04 | 0.00 | 0.00 | 0.16  |
| 10659 | CUGBP2  | 0.02 | 0.00 | 0.00 | -0.05 |
| 10660 | LBX1    | 0.02 | 0.00 | 0.00 | 0.17  |
| 10661 | KLF1    | 0.00 | 0.14 | 0.05 | -0.03 |
| 10664 | CTCF    | 0.00 | 0.00 | 0.00 | NaN   |
| 10665 | C6orf10 | 0.02 | 0.00 | 0.05 | 0.16  |
| 10672 | GNA13   | 0.12 | 0.00 | 0.20 | 0.29  |
| 10675 | CSPG5   | 0.02 | 0.14 | 0.15 | 0.49  |
| 10677 | AVIL    | 0.02 | 0.00 | 0.00 | 0.11  |
| 10678 | B3GNT1  | 0.04 | 0.00 | 0.05 | 0.20  |
| 10681 | GNB5    | 0.00 | 0.00 | 0.00 | NaN   |
| 10683 | DLL3    | 0.06 | 0.00 | 0.05 | 0.02  |
| 10686 | CLDN16  | 0.00 | 0.00 | 0.05 | -0.05 |
| 10687 | PNMA2   | 0.00 | 0.00 | 0.05 | 0.46  |

|       |         |      |      |      |       |
|-------|---------|------|------|------|-------|
| 10690 | FUT9    | 0.08 | 0.00 | 0.00 | 0.02  |
| 10691 | GMEB1   | 0.04 | 0.00 | 0.00 | 0.12  |
| 10692 | RRH     | 0.08 | 0.00 | 0.00 | 0.05  |
| 10693 | CCT6B   | 0.06 | 0.00 | 0.00 | 0.28  |
| 10694 | CCT8    | 0.02 | 0.00 | 0.00 | 0.04  |
| 10712 | C1orf2  | 0.04 | 0.00 | 0.15 | 0.20  |
| 10714 | POLD3   | 0.02 | 0.14 | 0.00 | 0.11  |
| 10716 | TBR1    | 0.02 | 0.00 | 0.00 | -0.07 |
| 10721 | POLQ    | 0.00 | 0.00 | 0.10 | 0.26  |
| 10723 | SLC12A7 | 0.00 | 0.00 | 0.00 | NaN   |
| 10724 | MGEA5   | 0.02 | 0.00 | 0.00 | 0.05  |
| 10725 | NFAT5   | 0.00 | 0.00 | 0.00 | NaN   |
| 10726 | NUDC    | 0.06 | 0.00 | 0.05 | -0.11 |
| 10730 | YME1L1  | 0.00 | 0.00 | 0.00 | NaN   |
| 10732 | TCFL5   | 0.08 | 0.00 | 0.05 | -0.13 |
| 10734 | STAG3   | 0.02 | 0.00 | 0.00 | -0.01 |
| 10736 | SIX2    | 0.02 | 0.00 | 0.05 | 0.01  |
| 10738 | RFPL3   | 0.00 | 0.29 | 0.05 | -0.17 |
| 10739 | RFPL2   | 0.00 | 0.29 | 0.05 | -0.11 |
| 10740 | RFPL1S  | 0.00 | 0.14 | 0.00 | -0.03 |
| 10741 | RBBP9   | 0.02 | 0.00 | 0.00 | 0.10  |
| 10743 | RAI1    | 0.02 | 0.00 | 0.00 | -0.04 |
| 10744 | PTTG2   | 0.06 | 0.14 | 0.10 | -0.01 |
| 10745 | PHTF1   | 0.02 | 0.00 | 0.05 | 0.18  |
| 10747 | MASP2   | 0.02 | 0.00 | 0.00 | 0.08  |
| 10748 | KLRA1   | 0.02 | 0.00 | 0.15 | -0.21 |
| 10749 | KIF1C   | 0.04 | 0.00 | 0.10 | -0.10 |
| 10750 | GRAP    | 0.02 | 0.00 | 0.00 | -0.18 |
| 10752 | CHL1    | 0.20 | 0.29 | 0.30 | -0.05 |
| 10753 | CAPN9   | 0.00 | 0.00 | 0.05 | -0.07 |
| 10762 | NUP50   | 0.00 | 0.14 | 0.05 | 0.01  |
| 10766 | TOB2    | 0.00 | 0.14 | 0.00 | 0.14  |
| 10767 | HBS1L   | 0.00 | 0.00 | 0.00 | NaN   |
| 10768 | AHCYL1  | 0.02 | 0.00 | 0.05 | 0.18  |
| 10772 | FUSIP1  | 0.02 | 0.00 | 0.05 | 0.13  |
| 10775 | POP4    | 0.00 | 0.14 | 0.05 | 0.40  |
| 10777 | ARPP-21 | 0.06 | 0.00 | 0.05 | -0.05 |
| 10781 | ZNF266  | 0.02 | 0.00 | 0.15 | 0.08  |
| 10782 | ZNF274  | 0.00 | 0.00 | 0.00 | NaN   |
| 10785 | WDR4    | 0.00 | 0.00 | 0.00 | NaN   |
| 10786 | SLC17A3 | 0.02 | 0.00 | 0.05 | -0.08 |
| 10787 | NCKAP1  | 0.00 | 0.00 | 0.00 | NaN   |
| 10788 | IQGAP2  | 0.04 | 0.00 | 0.05 | 0.02  |
| 10791 | VAMP5   | 0.00 | 0.00 | 0.00 | NaN   |
| 10793 | ZNF273  | 0.00 | 0.00 | 0.00 | NaN   |
| 10797 | MTHFD2  | 0.00 | 0.00 | 0.05 | 0.03  |
| 10798 | OR511   | 0.00 | 0.00 | 0.00 | NaN   |

|       |         |      |      |      |       |
|-------|---------|------|------|------|-------|
| 10799 | RPP40   | 0.08 | 0.14 | 0.10 | 0.11  |
| 10802 | SEC24A  | 0.00 | 0.00 | 0.00 | NaN   |
| 10803 | CCR9    | 0.02 | 0.14 | 0.15 | 0.20  |
| 10810 | WASF3   | 0.00 | 0.00 | 0.05 | 0.16  |
| 10814 | CPLX2   | 0.00 | 0.00 | 0.00 | NaN   |
| 10825 | NEU3    | 0.02 | 0.14 | 0.00 | -0.03 |
| 10826 | C5orf4  | 0.02 | 0.00 | 0.00 | 0.00  |
| 10841 | FTCD    | 0.00 | 0.00 | 0.05 | -0.11 |
| 10845 | CLPX    | 0.00 | 0.00 | 0.10 | -0.07 |
| 10846 | PDE10A  | 0.02 | 0.00 | 0.05 | 0.06  |
| 10847 | SRCAP   | 0.02 | 0.00 | 0.00 | 0.01  |
| 10855 | HPSE    | 0.00 | 0.00 | 0.10 | 0.14  |
| 10856 | RUVBL2  | 0.06 | 0.00 | 0.05 | 0.01  |
| 10859 | LILRB1  | 0.02 | 0.00 | 0.05 | 0.10  |
| 10861 | SLC26A1 | 0.06 | 0.00 | 0.05 | -0.04 |
| 10863 | ADAM28  | 0.00 | 0.00 | 0.00 | NaN   |
| 10864 | SLC22A7 | 0.00 | 0.00 | 0.00 | NaN   |
| 10868 | USP20   | 0.00 | 0.00 | 0.00 | NaN   |
| 10869 | USP19   | 0.00 | 0.00 | 0.05 | 0.02  |
| 10873 | ME3     | 0.02 | 0.00 | 0.00 | 0.15  |
| 10874 | NMU     | 0.00 | 0.00 | 0.10 | 0.20  |
| 10875 | FGL2    | 0.00 | 0.00 | 0.00 | NaN   |
| 10880 | ACTL7B  | 0.02 | 0.00 | 0.05 | 0.04  |
| 10881 | ACTL7A  | 0.02 | 0.00 | 0.05 | -0.03 |
| 10884 | MRPS30  | 0.18 | 0.00 | 0.30 | -0.07 |
| 10885 | WDR3    | 0.12 | 0.00 | 0.05 | -0.05 |
| 10892 | MALT1   | 0.00 | 0.00 | 0.15 | 0.26  |
| 10893 | MMP24   | 0.00 | 0.00 | 0.10 | 0.17  |
| 10896 | OCLM    | 0.00 | 0.00 | 0.05 | -0.02 |
| 10898 | CPSF4   | 0.02 | 0.00 | 0.00 | 0.17  |
| 10899 | JTB     | 0.02 | 0.00 | 0.10 | 0.15  |
| 10904 | BLCAP   | 0.04 | 0.00 | 0.00 | 0.35  |
| 10905 | MAN1A2  | 0.08 | 0.00 | 0.10 | 0.14  |
| 10911 | UTS2    | 0.00 | 0.00 | 0.00 | NaN   |
| 10912 | GADD45G | 0.00 | 0.00 | 0.00 | NaN   |
| 10913 | EDAR    | 0.02 | 0.00 | 0.00 | -0.03 |
| 10915 | TCERG1  | 0.00 | 0.00 | 0.00 | NaN   |
| 10921 | RNPS1   | 0.18 | 0.00 | 0.10 | -0.12 |
| 10922 | FASTK   | 0.02 | 0.00 | 0.00 | -0.02 |
| 10928 | RALBP1  | 0.02 | 0.00 | 0.00 | 0.12  |
| 10930 | APOBEC2 | 0.06 | 0.00 | 0.05 | 0.28  |
| 10934 | MORF4   | 0.00 | 0.00 | 0.00 | NaN   |
| 10935 | PRDX3   | 0.04 | 0.00 | 0.05 | -0.01 |
| 10936 | GPR75   | 0.02 | 0.00 | 0.05 | 0.06  |
| 10938 | EHD1    | 0.02 | 0.00 | 0.00 | 0.02  |
| 10939 | AFG3L2  | 0.04 | 0.00 | 0.10 | 0.18  |
| 10942 | PRSS21  | 0.02 | 0.00 | 0.00 | -0.06 |

|       |          |      |      |      |       |
|-------|----------|------|------|------|-------|
| 10945 | KDELR1   | 0.02 | 0.00 | 0.00 | 0.18  |
| 10946 | SF3A3    | 0.04 | 0.00 | 0.05 | 0.17  |
| 10947 | AP3M2    | 0.04 | 0.14 | 0.05 | 0.18  |
| 10950 | BTG3     | 0.00 | 0.00 | 0.00 | NaN   |
| 10951 | CBX1     | 0.04 | 0.00 | 0.05 | 0.16  |
| 10952 | SEC61B   | 0.04 | 0.00 | 0.00 | -0.13 |
| 10953 | TOMM34   | 0.02 | 0.00 | 0.00 | 0.66  |
| 10963 | STIP1    | 0.02 | 0.00 | 0.00 | -0.03 |
| 10966 | RAB40B   | 0.00 | 0.00 | 0.00 | NaN   |
| 10969 | EBNA1BP2 | 0.02 | 0.00 | 0.05 | 0.22  |
| 10970 | CKAP4    | 0.00 | 0.29 | 0.00 | 0.27  |
| 10971 | YWHAQ    | 0.00 | 0.00 | 0.00 | NaN   |
| 10975 | UQCR     | 0.02 | 0.00 | 0.05 | 0.05  |
| 10981 | RAB32    | 0.02 | 0.00 | 0.05 | 0.03  |
| 10982 | MAPRE2   | 0.02 | 0.00 | 0.05 | 0.06  |
| 10983 | CCNI     | 0.00 | 0.00 | 0.00 | NaN   |
| 10985 | GCN1L1   | 0.02 | 0.00 | 0.10 | 0.26  |
| 10987 | COP5     | 0.00 | 0.00 | 0.00 | NaN   |
| 10988 | METAP2   | 0.00 | 0.00 | 0.00 | NaN   |
| 10989 | IMMT     | 0.04 | 0.00 | 0.05 | 0.06  |
| 10990 | LILRB5   | 0.02 | 0.00 | 0.05 | 0.08  |
| 10991 | SLC38A3  | 0.00 | 0.00 | 0.05 | 0.08  |
| 10992 | SF3B2    | 0.04 | 0.00 | 0.05 | -0.06 |
| 10993 | SDS      | 0.02 | 0.00 | 0.00 | -0.03 |
| 10994 | ILVBL    | 0.04 | 0.00 | 0.00 | -0.05 |
| 11005 | SPINK5   | 0.02 | 0.14 | 0.00 | 0.10  |
| 11006 | LILRB4   | 0.02 | 0.00 | 0.05 | 0.10  |
| 11009 | IL24     | 0.00 | 0.00 | 0.05 | 0.00  |
| 11011 | TLK2     | 0.10 | 0.00 | 0.05 | 0.51  |
| 11012 | KLK11    | 0.02 | 0.00 | 0.05 | 0.02  |
| 11014 | KDELR2   | 0.02 | 0.00 | 0.00 | 0.15  |
| 11015 | KDELR3   | 0.00 | 0.14 | 0.00 | 0.12  |
| 11016 | ATF7     | 0.00 | 0.00 | 0.00 | NaN   |
| 11020 | RABL4    | 0.00 | 0.14 | 0.00 | 0.21  |
| 11021 | RAB35    | 0.02 | 0.00 | 0.10 | 0.17  |
| 11022 | TDRKH    | 0.02 | 0.00 | 0.10 | 0.23  |
| 11024 | LILRA1   | 0.02 | 0.00 | 0.05 | 0.00  |
| 11025 | LILRB3   | 0.02 | 0.00 | 0.05 | 0.07  |
| 11026 | LILRA3   | 0.02 | 0.00 | 0.05 | 0.01  |
| 11027 | LILRA2   | 0.02 | 0.00 | 0.05 | 0.08  |
| 11030 | RBPM5    | 0.06 | 0.00 | 0.05 | 0.07  |
| 11031 | RAB31    | 0.00 | 0.00 | 0.05 | 0.07  |
| 11034 | DSTN     | 0.00 | 0.00 | 0.00 | NaN   |
| 11041 | B3GNT6   | 0.02 | 0.00 | 0.05 | -0.08 |
| 11044 | POLS     | 0.00 | 0.00 | 0.00 | NaN   |
| 11045 | UPK1A    | 0.00 | 0.00 | 0.00 | NaN   |
| 11047 | ADRM1    | 0.08 | 0.00 | 0.05 | 0.19  |

|       |         |      |      |      |       |
|-------|---------|------|------|------|-------|
| 11052 | CPSF6   | 0.08 | 0.00 | 0.00 | 0.25  |
| 11054 | OGFR    | 0.08 | 0.00 | 0.05 | 0.06  |
| 11055 | ZBPB    | 0.00 | 0.00 | 0.00 | NaN   |
| 11059 | WWP1    | 0.06 | 0.00 | 0.15 | -0.04 |
| 11060 | WWP2    | 0.00 | 0.00 | 0.00 | NaN   |
| 11063 | SOX30   | 0.00 | 0.00 | 0.00 | NaN   |
| 11065 | UBE2C   | 0.02 | 0.00 | 0.00 | 0.17  |
| 11071 | ATP9B   | 0.02 | 0.00 | 0.05 | 0.00  |
| 11072 | DUSP14  | 0.06 | 0.00 | 0.00 | 0.21  |
| 11073 | TOPBP1  | 0.00 | 0.00 | 0.10 | -0.01 |
| 11074 | TRIM31  | 0.04 | 0.14 | 0.05 | 0.17  |
| 11075 | STMN2   | 0.10 | 0.00 | 0.05 | -0.02 |
| 11077 | HSF2BP  | 0.02 | 0.00 | 0.00 | -0.05 |
| 11080 | DNAJB4  | 0.06 | 0.00 | 0.00 | -0.04 |
| 11081 | KERA    | 0.00 | 0.00 | 0.00 | NaN   |
| 11082 | ESM1    | 0.00 | 0.14 | 0.05 | 0.00  |
| 11085 | ADAM30  | 0.41 | 0.43 | 0.10 | -0.02 |
| 11086 | ADAM29  | 0.00 | 0.00 | 0.00 | NaN   |
| 11092 | C9orf9  | 0.04 | 0.00 | 0.00 | -0.17 |
| 11094 | C9orf7  | 0.04 | 0.00 | 0.00 | -0.02 |
| 11095 | ADAMTS8 | 0.02 | 0.00 | 0.00 | -0.05 |
| 11096 | ADAMTS5 | 0.04 | 0.00 | 0.00 | 0.02  |
| 11099 | PTPN21  | 0.04 | 0.00 | 0.05 | 0.09  |
| 11102 | RPP14   | 0.02 | 0.00 | 0.00 | -0.27 |
| 11104 | KATNA1  | 0.02 | 0.00 | 0.05 | -0.01 |
| 11107 | PRDM5   | 0.02 | 0.00 | 0.00 | 0.02  |
| 11108 | PRDM4   | 0.02 | 0.00 | 0.00 | 0.23  |
| 11113 | CIT     | 0.02 | 0.00 | 0.10 | 0.01  |
| 11118 | BTN3A2  | 0.00 | 0.14 | 0.00 | -0.02 |
| 11119 | BTN3A1  | 0.00 | 0.14 | 0.00 | 0.08  |
| 11120 | BTN2A1  | 0.00 | 0.14 | 0.00 | -0.01 |
| 11122 | PTPRT   | 0.02 | 0.00 | 0.00 | -0.11 |
| 11124 | FAF1    | 0.02 | 0.00 | 0.00 | 0.27  |
| 11127 | KIF3A   | 0.00 | 0.00 | 0.00 | NaN   |
| 11130 | ZWINT   | 0.02 | 0.14 | 0.10 | -0.05 |
| 11131 | CAPN11  | 0.04 | 0.14 | 0.20 | -0.21 |
| 11132 | CAPN10  | 0.08 | 0.43 | 0.10 | -0.09 |
| 11133 | KPTN    | 0.00 | 0.00 | 0.00 | NaN   |
| 11136 | SLC7A9  | 0.00 | 0.00 | 0.00 | NaN   |
| 11137 | PWP1    | 0.02 | 0.00 | 0.00 | 0.10  |
| 11140 | CDC37   | 0.02 | 0.00 | 0.15 | 0.20  |
| 11142 | PKIG    | 0.02 | 0.00 | 0.00 | 0.56  |
| 11144 | DMC1    | 0.00 | 0.14 | 0.00 | 0.11  |
| 11147 | HHLA3   | 0.04 | 0.14 | 0.00 | 0.08  |
| 11148 | HHLA2   | 0.02 | 0.00 | 0.00 | 0.08  |
| 11151 | CORO1A  | 0.02 | 0.00 | 0.00 | 0.01  |
| 11154 | AP4S1   | 0.02 | 0.00 | 0.00 | 0.55  |

|       |         |      |      |      |       |
|-------|---------|------|------|------|-------|
| 11155 | LDB3    | 0.00 | 0.00 | 0.05 | 0.00  |
| 11156 | PTP4A3  | 0.10 | 0.00 | 0.15 | 0.19  |
| 11157 | LSM6    | 0.00 | 0.14 | 0.00 | -0.15 |
| 11159 | RABL2A  | 0.00 | 0.00 | 0.10 | 0.01  |
| 11161 | C14orf1 | 0.00 | 0.00 | 0.00 | NaN   |
| 11162 | NUDT6   | 0.00 | 0.14 | 0.05 | -0.10 |
| 11163 | NUDT4   | 0.00 | 0.00 | 0.00 | NaN   |
| 11165 | NUDT3   | 0.00 | 0.00 | 0.00 | NaN   |
| 11166 | SOX21   | 0.04 | 0.00 | 0.00 | 0.08  |
| 11167 | FSTL1   | 0.00 | 0.00 | 0.10 | 0.04  |
| 11173 | ADAMTS7 | 0.00 | 0.00 | 0.05 | 0.01  |
| 11174 | ADAMTS6 | 0.04 | 0.00 | 0.05 | -0.09 |
| 11176 | BAZ2A   | 0.00 | 0.00 | 0.00 | NaN   |
| 11177 | BAZ1A   | 0.04 | 0.00 | 0.00 | 0.10  |
| 11178 | LZTS1   | 0.00 | 0.00 | 0.00 | NaN   |
| 11179 | ZNF277  | 0.00 | 0.00 | 0.00 | NaN   |
| 11180 | WDR6    | 0.00 | 0.00 | 0.05 | 0.17  |
| 11181 | TREH    | 0.00 | 0.00 | 0.05 | -0.03 |
| 11182 | SLC2A6  | 0.04 | 0.00 | 0.00 | -0.11 |
| 11183 | MAP4K5  | 0.02 | 0.00 | 0.00 | 0.20  |
| 11184 | MAP4K1  | 0.00 | 0.00 | 0.00 | NaN   |
| 11186 | RASSF1  | 0.00 | 0.00 | 0.10 | 0.31  |
| 11187 | PKP3    | 0.06 | 0.29 | 0.10 | -0.10 |
| 11188 | NISCH   | 0.00 | 0.00 | 0.10 | -0.05 |
| 11189 | TNRC4   | 0.02 | 0.00 | 0.10 | 0.05  |
| 11193 | WBP4    | 0.00 | 0.00 | 0.00 | NaN   |
| 11194 | ABCB8   | 0.02 | 0.00 | 0.00 | 0.02  |
| 11197 | WIF1    | 0.06 | 0.00 | 0.00 | -0.08 |
| 11199 | ANXA10  | 0.00 | 0.00 | 0.00 | NaN   |
| 11200 | CHEK2   | 0.00 | 0.14 | 0.05 | 0.26  |
| 11201 | POLI    | 0.00 | 0.00 | 0.05 | 0.01  |
| 11202 | KLK8    | 0.00 | 0.00 | 0.00 | NaN   |
| 11211 | FZD10   | 0.02 | 0.00 | 0.10 | -0.10 |
| 11212 | PROSC   | 0.12 | 0.14 | 0.05 | 0.45  |
| 11215 | AKAP11  | 0.02 | 0.00 | 0.00 | 0.12  |
| 11216 | AKAP10  | 0.10 | 0.00 | 0.05 | -0.02 |
| 11217 | AKAP2   | 0.02 | 0.00 | 0.05 | 0.10  |
| 11221 | DUSP10  | 0.02 | 0.00 | 0.00 | 0.03  |
| 11222 | MRPL3   | 0.02 | 0.00 | 0.00 | -0.06 |
| 11223 | MSTP9   | 0.02 | 0.00 | 0.00 | 0.03  |
| 11224 | RPL35   | 0.06 | 0.00 | 0.00 | 0.11  |
| 11226 | GALNT6  | 0.00 | 0.00 | 0.00 | NaN   |
| 11232 | POLG2   | 0.12 | 0.00 | 0.20 | 0.34  |
| 11235 | PDCD10  | 0.00 | 0.00 | 0.00 | NaN   |
| 11237 | RNF24   | 0.00 | 0.00 | 0.05 | 0.18  |
| 11243 | PMF1    | 0.04 | 0.14 | 0.05 | -0.02 |
| 11247 | NXPH4   | 0.00 | 0.00 | 0.00 | NaN   |



|       |           |      |      |      |       |
|-------|-----------|------|------|------|-------|
| 11248 | NXPH3     | 0.04 | 0.00 | 0.05 | 0.20  |
| 11250 | GPR45     | 0.02 | 0.00 | 0.10 | -0.08 |
| 11251 | GPR44     | 0.00 | 0.00 | 0.05 | -0.05 |
| 11252 | PACSIN2   | 0.00 | 0.14 | 0.05 | -0.08 |
| 11255 | HRH3      | 0.08 | 0.00 | 0.05 | 0.02  |
| 11257 | TP53TG1   | 0.00 | 0.00 | 0.00 | NaN   |
| 11258 | DCTN3     | 0.00 | 0.00 | 0.00 | NaN   |
| 11260 | XPOT      | 0.04 | 0.14 | 0.00 | 0.24  |
| 11261 | CHP       | 0.00 | 0.00 | 0.00 | NaN   |
| 11262 | SP140     | 0.02 | 0.00 | 0.15 | 0.23  |
| 11264 | PXMP4     | 0.02 | 0.00 | 0.05 | -0.17 |
| 11266 | DUSP12    | 0.00 | 0.00 | 0.00 | NaN   |
| 11274 | USP18     | 0.02 | 0.14 | 0.20 | -0.12 |
| 11275 | KLHL2     | 0.02 | 0.00 | 0.00 | 0.05  |
| 11277 | TREX1     | 0.00 | 0.00 | 0.05 | 0.22  |
| 11278 | KLF12     | 0.02 | 0.00 | 0.00 | -0.09 |
| 11282 | MGAT4B    | 0.08 | 0.43 | 0.10 | -0.19 |
| 11283 | CYP4F8    | 0.04 | 0.00 | 0.00 | -0.06 |
| 11284 | PNKP      | 0.02 | 0.00 | 0.05 | 0.09  |
| 11285 | B4GALT7   | 0.00 | 0.29 | 0.00 | 0.09  |
| 11313 | LYPLA2    | 0.02 | 0.00 | 0.05 | -0.07 |
| 11316 | COPE      | 0.02 | 0.00 | 0.00 | 0.19  |
| 11320 | MGAT4A    | 0.02 | 0.00 | 0.10 | -0.02 |
| 11329 | STK38     | 0.00 | 0.00 | 0.00 | NaN   |
| 11330 | CTRC      | 0.02 | 0.00 | 0.00 | -0.07 |
| 11333 | PDAP1     | 0.02 | 0.00 | 0.00 | 0.01  |
| 11335 | CBX3      | 0.00 | 0.00 | 0.00 | NaN   |
| 11337 | GABARAP   | 0.00 | 0.00 | 0.00 | NaN   |
| 11339 | OIP5      | 0.00 | 0.00 | 0.00 | NaN   |
| 11341 | SCRG1     | 0.00 | 0.00 | 0.00 | NaN   |
| 11342 | RNF13     | 0.00 | 0.00 | 0.00 | NaN   |
| 11343 | MGLL      | 0.04 | 0.00 | 0.00 | 0.18  |
| 11345 | GABARAPL2 | 0.00 | 0.00 | 0.00 | NaN   |
| 22795 | NID2      | 0.02 | 0.00 | 0.00 | 0.23  |
| 22797 | TFEC      | 0.00 | 0.00 | 0.05 | 0.14  |
| 22798 | LAMB4     | 0.00 | 0.00 | 0.00 | NaN   |
| 22800 | RRAS2     | 0.00 | 0.00 | 0.00 | NaN   |
| 22802 | CLCA4     | 0.04 | 0.00 | 0.05 | 0.03  |
| 22808 | MRAS      | 0.00 | 0.00 | 0.00 | NaN   |
| 22809 | ATF5      | 0.02 | 0.00 | 0.05 | 0.37  |
| 22822 | PHLDA1    | 0.02 | 0.00 | 0.00 | 0.12  |
| 22826 | DNAJC8    | 0.04 | 0.00 | 0.00 | 0.13  |
| 22832 | KIAA1009  | 0.10 | 0.00 | 0.20 | -0.16 |
| 22856 | CHSY1     | 0.16 | 0.00 | 0.10 | -0.10 |
| 22858 | ICK       | 0.02 | 0.00 | 0.00 | -0.02 |
| 22863 | KIAA0831  | 0.00 | 0.00 | 0.10 | 0.11  |
| 22871 | NLGN1     | 0.06 | 0.00 | 0.00 | -0.06 |

|       |          |      |      |      |       |
|-------|----------|------|------|------|-------|
| 22873 | DZIP1    | 0.04 | 0.00 | 0.00 | -0.02 |
| 22875 | ENPP4    | 0.04 | 0.14 | 0.20 | -0.11 |
| 22878 | KIAA1012 | 0.02 | 0.00 | 0.10 | -0.05 |
| 22881 | ANKRD6   | 0.00 | 0.00 | 0.05 | 0.09  |
| 22883 | CLSTN1   | 0.00 | 0.00 | 0.00 | NaN   |
| 22889 | KIAA0907 | 0.04 | 0.14 | 0.05 | 0.01  |
| 22894 | DIS3     | 0.00 | 0.00 | 0.00 | NaN   |
| 22895 | RPH3A    | 0.02 | 0.00 | 0.00 | -0.05 |
| 22899 | ARHGEF15 | 0.00 | 0.00 | 0.00 | NaN   |
| 22903 | BTBD3    | 0.00 | 0.00 | 0.00 | NaN   |
| 22905 | EPN2     | 0.02 | 0.00 | 0.00 | 0.02  |
| 22908 | SACM1L   | 0.02 | 0.14 | 0.15 | -0.02 |
| 22913 | RALY     | 0.02 | 0.00 | 0.05 | -0.07 |
| 22916 | NCBP2    | 0.02 | 0.00 | 0.00 | 0.42  |
| 22919 | MAPRE1   | 0.04 | 0.00 | 0.15 | -0.07 |
| 22920 | KIFAP3   | 0.02 | 0.00 | 0.00 | -0.03 |
| 22924 | MAPRE3   | 0.00 | 0.00 | 0.00 | NaN   |
| 22925 | PLA2R1   | 0.00 | 0.00 | 0.05 | -0.01 |
| 22926 | ATF6     | 0.00 | 0.00 | 0.00 | NaN   |
| 22932 | POMZP3   | 0.00 | 0.00 | 0.00 | NaN   |
| 22933 | SIRT2    | 0.06 | 0.00 | 0.05 | 0.00  |
| 22934 | RPIA     | 0.04 | 0.00 | 0.05 | 0.16  |
| 22936 | ELL2     | 0.00 | 0.00 | 0.00 | NaN   |
| 22937 | SCAP     | 0.02 | 0.14 | 0.15 | 0.27  |
| 22938 | SNW1     | 0.00 | 0.00 | 0.00 | NaN   |
| 22939 | PTRF     | 0.02 | 0.86 | 0.05 | 0.23  |
| 22941 | SHANK2   | 0.06 | 0.00 | 0.10 | 0.31  |
| 22943 | DKK1     | 0.02 | 0.14 | 0.10 | 0.15  |
| 22944 | KIN      | 0.00 | 0.00 | 0.00 | NaN   |
| 22948 | CCT5     | 0.00 | 0.00 | 0.00 | NaN   |
| 22950 | SLC4A1AP | 0.00 | 0.00 | 0.00 | NaN   |
| 22953 | P2RX2    | 0.08 | 0.14 | 0.05 | 0.05  |
| 22954 | TRIM32   | 0.02 | 0.00 | 0.00 | 0.16  |
| 22955 | SCMH1    | 0.02 | 0.00 | 0.05 | 0.11  |
| 22977 | AKR7A3   | 0.00 | 0.00 | 0.00 | NaN   |
| 22978 | NT5C2    | 0.02 | 0.00 | 0.00 | -0.23 |
| 22986 | SORCS3   | 0.02 | 0.00 | 0.05 | -0.12 |
| 23011 | RAB21    | 0.12 | 0.00 | 0.05 | 0.33  |
| 23012 | STK38L   | 0.00 | 0.00 | 0.00 | NaN   |
| 23014 | FBXO21   | 0.02 | 0.00 | 0.10 | 0.03  |
| 23018 | KIAA0284 | 0.02 | 0.00 | 0.10 | -0.05 |
| 23037 | PDZD2    | 0.00 | 0.00 | 0.00 | NaN   |
| 23040 | MYT1L    | 0.20 | 0.14 | 0.35 | -0.14 |
| 23049 | SMG1     | 0.00 | 0.00 | 0.00 | NaN   |
| 23053 | KIAA0913 | 0.02 | 0.00 | 0.00 | 0.15  |
| 23054 | NCOA6    | 0.02 | 0.00 | 0.05 | -0.09 |
| 23056 | KIAA0754 | 0.04 | 0.00 | 0.05 | 0.19  |

|       |           |      |      |      |       |
|-------|-----------|------|------|------|-------|
| 23062 | GGA2      | 0.02 | 0.14 | 0.00 | 0.02  |
| 23065 | KIAA0090  | 0.00 | 0.00 | 0.00 | NaN   |
| 23075 | SWAP70    | 0.00 | 0.00 | 0.00 | NaN   |
| 23078 | KIAA0564  | 0.00 | 0.00 | 0.00 | NaN   |
| 23089 | PEG10     | 0.02 | 0.00 | 0.00 | 0.02  |
| 23095 | KIF1B     | 0.00 | 0.00 | 0.00 | NaN   |
| 23107 | MRPS27    | 0.06 | 0.00 | 0.00 | -0.32 |
| 23114 | NFASC     | 0.02 | 0.00 | 0.05 | -0.01 |
| 23118 | MAP3K7IP2 | 0.02 | 0.00 | 0.05 | -0.03 |
| 23119 | HIC2      | 0.06 | 0.14 | 0.15 | 0.33  |
| 23120 | ATP10B    | 0.00 | 0.00 | 0.00 | NaN   |
| 23122 | CLASP2    | 0.06 | 0.00 | 0.05 | 0.11  |
| 23136 | EPB41L3   | 0.02 | 0.00 | 0.00 | -0.07 |
| 23138 | N4BP3     | 0.00 | 0.29 | 0.00 | -0.10 |
| 23152 | CIC       | 0.00 | 0.00 | 0.05 | 0.35  |
| 23157 | 9/2/2010  | 0.08 | 0.43 | 0.10 | -0.05 |
| 23161 | SNX13     | 0.00 | 0.00 | 0.05 | 0.30  |
| 23162 | MAPK8IP3  | 0.18 | 0.00 | 0.10 | -0.09 |
| 23163 | GGA3      | 0.02 | 0.14 | 0.00 | 0.37  |
| 23166 | STAB1     | 0.00 | 0.00 | 0.10 | 0.06  |
| 23173 | METAP1    | 0.00 | 0.00 | 0.00 | NaN   |
| 23175 | LPIN1     | 0.00 | 0.00 | 0.00 | NaN   |
| 23178 | PASK      | 0.08 | 0.43 | 0.10 | 0.09  |
| 23194 | FBXL7     | 0.00 | 0.00 | 0.00 | NaN   |
| 23195 | MDN1      | 0.00 | 0.00 | 0.05 | 0.25  |
| 23199 | KIAA0182  | 0.00 | 0.00 | 0.00 | NaN   |
| 23200 | ATP11B    | 0.00 | 0.00 | 0.10 | 0.29  |
| 23212 | RRS1      | 0.00 | 0.00 | 0.00 | NaN   |
| 23216 | TBC1D1    | 0.06 | 0.14 | 0.10 | -0.04 |
| 23228 | PLCL2     | 0.06 | 0.00 | 0.05 | 0.12  |
| 23231 | KIAA0746  | 0.00 | 0.00 | 0.00 | NaN   |
| 23236 | PLCB1     | 0.00 | 0.00 | 0.00 | NaN   |
| 23237 | ARC       | 0.10 | 0.00 | 0.15 | 0.04  |
| 23240 | KIAA0922  | 0.02 | 0.14 | 0.00 | -0.03 |
| 23245 | ASTN2     | 0.02 | 0.00 | 0.00 | 0.07  |
| 23246 | BOP1      | 0.10 | 0.00 | 0.15 | 0.28  |
| 23247 | KIAA0556  | 0.06 | 0.14 | 0.00 | 0.03  |
| 23250 | ATP11A    | 0.06 | 0.00 | 0.00 | 0.00  |
| 23255 | KIAA0802  | 0.02 | 0.00 | 0.00 | 0.02  |
| 23263 | MCF2L     | 0.06 | 0.00 | 0.00 | 0.16  |
| 23269 | MGA       | 0.00 | 0.00 | 0.00 | NaN   |
| 23277 | KIAA0664  | 0.00 | 0.00 | 0.00 | NaN   |
| 23279 | NUP160    | 0.04 | 0.00 | 0.00 | 0.01  |
| 23281 | KIAA0774  | 0.00 | 0.00 | 0.05 | -0.11 |
| 23283 | CSTF2T    | 0.00 | 0.00 | 0.05 | -0.11 |
| 23285 | KIAA1107  | 0.00 | 0.00 | 0.00 | NaN   |
| 23287 | AGTPBP1   | 0.00 | 0.00 | 0.00 | NaN   |

|       |          |      |      |      |       |
|-------|----------|------|------|------|-------|
| 23299 | BICD2    | 0.04 | 0.00 | 0.05 | 0.12  |
| 23303 | KIF13B   | 0.02 | 0.00 | 0.00 | -0.05 |
| 23321 | TRIM2    | 0.02 | 0.14 | 0.00 | 0.00  |
| 23325 | KIAA1033 | 0.00 | 0.00 | 0.00 | NaN   |
| 23326 | USP22    | 0.10 | 0.00 | 0.05 | 0.25  |
| 23327 | NEDD4L   | 0.00 | 0.00 | 0.15 | 0.37  |
| 23332 | CLASP1   | 0.00 | 0.00 | 0.10 | -0.14 |
| 23334 | KIAA0467 | 0.02 | 0.00 | 0.05 | 0.26  |
| 23335 | WDR7     | 0.00 | 0.00 | 0.00 | NaN   |
| 23339 | VPS39    | 0.04 | 0.00 | 0.00 | -0.12 |
| 23349 | KIAA1045 | 0.00 | 0.00 | 0.00 | NaN   |
| 23351 | KIAA0323 | 0.02 | 0.00 | 0.05 | 0.07  |
| 23358 | USP24    | 0.02 | 0.00 | 0.00 | 0.32  |
| 23359 | KIAA0574 | 0.00 | 0.00 | 0.00 | NaN   |
| 23364 | KIAA1109 | 0.00 | 0.14 | 0.05 | 0.29  |
| 23365 | ARHGEF12 | 0.00 | 0.00 | 0.00 | NaN   |
| 23366 | KIAA0895 | 0.00 | 0.00 | 0.00 | NaN   |
| 23369 | PUM2     | 0.00 | 0.00 | 0.00 | NaN   |
| 23376 | KIAA0776 | 0.08 | 0.00 | 0.00 | -0.01 |
| 23379 | KIAA0947 | 0.00 | 0.00 | 0.00 | NaN   |
| 23380 | SRGAP2   | 0.02 | 0.00 | 0.05 | 0.12  |
| 23383 | KIAA0892 | 0.12 | 0.00 | 0.15 | 0.02  |
| 23385 | NCSTN    | 0.00 | 0.00 | 0.00 | NaN   |
| 23387 | KIAA0999 | 0.02 | 0.00 | 0.00 | -0.14 |
| 23392 | KIAA0368 | 0.02 | 0.00 | 0.00 | 0.52  |
| 23394 | ADNP     | 0.10 | 0.00 | 0.00 | 0.06  |
| 23395 | LARS2    | 0.02 | 0.14 | 0.15 | 0.20  |
| 23396 | PIP5K1C  | 0.02 | 0.00 | 0.15 | -0.27 |
| 23401 | FRAT2    | 0.00 | 0.00 | 0.05 | -0.11 |
| 23405 | DICER1   | 0.00 | 0.00 | 0.05 | 0.03  |
| 23408 | SIRT5    | 0.02 | 0.00 | 0.00 | 0.04  |
| 23409 | SIRT4    | 0.02 | 0.00 | 0.10 | -0.20 |
| 23410 | SIRT3    | 0.06 | 0.29 | 0.10 | 0.01  |
| 23411 | SIRT1    | 0.00 | 0.00 | 0.00 | NaN   |
| 23413 | FREQ     | 0.04 | 0.00 | 0.00 | -0.18 |
| 23415 | KCNH4    | 0.02 | 0.86 | 0.05 | 0.13  |
| 23417 | MLYCD    | 0.00 | 0.00 | 0.00 | NaN   |
| 23418 | CRB1     | 0.00 | 0.00 | 0.00 | NaN   |
| 23421 | ITGB3BP  | 0.04 | 0.00 | 0.00 | 0.32  |
| 23426 | GRIP1    | 0.08 | 0.00 | 0.00 | 0.00  |
| 23428 | SLC7A8   | 0.02 | 0.14 | 0.10 | -0.10 |
| 23429 | RYBP     | 0.16 | 0.14 | 0.30 | -0.19 |
| 23430 | TPSD1    | 0.18 | 0.00 | 0.10 | 0.00  |
| 23431 | AP4E1    | 0.00 | 0.00 | 0.00 | NaN   |
| 23435 | TARDBP   | 0.02 | 0.00 | 0.00 | 0.04  |
| 23436 | ELA3B    | 0.00 | 0.00 | 0.05 | -0.10 |
| 23443 | SLC35A3  | 0.02 | 0.00 | 0.00 | -0.11 |

|       |          |      |      |      |       |
|-------|----------|------|------|------|-------|
| 23450 | SF3B3    | 0.00 | 0.00 | 0.00 | NaN   |
| 23451 | SF3B1    | 0.00 | 0.00 | 0.05 | 0.01  |
| 23452 | ANGPTL2  | 0.02 | 0.00 | 0.00 | -0.06 |
| 23457 | ABCB9    | 0.02 | 0.00 | 0.10 | 0.06  |
| 23460 | ABCA6    | 0.12 | 0.00 | 0.20 | 0.09  |
| 23461 | ABCA5    | 0.12 | 0.00 | 0.20 | 0.29  |
| 23462 | HEY1     | 0.10 | 0.00 | 0.05 | 0.02  |
| 23463 | ICMT     | 0.02 | 0.00 | 0.00 | 0.25  |
| 23464 | GCAT     | 0.00 | 0.14 | 0.00 | 0.22  |
| 23466 | CBX6     | 0.00 | 0.14 | 0.00 | -0.01 |
| 23468 | CBX5     | 0.02 | 0.00 | 0.05 | -0.06 |
| 23469 | PHF3     | 0.12 | 0.00 | 0.05 | 0.04  |
| 23473 | CAPN7    | 0.00 | 0.00 | 0.05 | -0.08 |
| 23475 | QPRT     | 0.06 | 0.14 | 0.00 | -0.05 |
| 23476 | BRD4     | 0.04 | 0.00 | 0.00 | -0.09 |
| 23480 | SEC61G   | 0.02 | 0.00 | 0.05 | -0.33 |
| 23481 | PES1     | 0.00 | 0.29 | 0.05 | 0.16  |
| 23484 | LEPROTL1 | 0.06 | 0.00 | 0.05 | -0.17 |
| 23491 | CES3     | 0.02 | 0.00 | 0.00 | -0.08 |
| 23493 | HEY2     | 0.00 | 0.00 | 0.10 | -0.01 |
| 23498 | HAAO     | 0.02 | 0.00 | 0.05 | 0.07  |
| 23499 | MACF1    | 0.04 | 0.00 | 0.05 | 0.17  |
| 23500 | DAAM2    | 0.02 | 0.00 | 0.05 | -0.10 |
| 23506 | KIAA0240 | 0.06 | 0.00 | 0.05 | -0.02 |
| 23509 | POFUT1   | 0.04 | 0.00 | 0.15 | 0.10  |
| 23513 | SCRIB    | 0.10 | 0.00 | 0.15 | 0.36  |
| 23514 | KIAA0146 | 0.04 | 0.00 | 0.00 | -0.03 |
| 23519 | ANP32D   | 0.04 | 0.00 | 0.05 | 0.16  |
| 23520 | ANP32C   | 0.00 | 0.00 | 0.05 | -0.02 |
| 23521 | RPL13A   | 0.02 | 0.00 | 0.05 | 0.05  |
| 23523 | CABIN1   | 0.00 | 0.14 | 0.05 | 0.08  |
| 23524 | SRRM2    | 0.02 | 0.00 | 0.00 | -0.06 |
| 23528 | ZNF281   | 0.00 | 0.00 | 0.05 | 0.06  |
| 23530 | NNT      | 0.18 | 0.00 | 0.30 | 0.19  |
| 23531 | MMD      | 0.02 | 0.00 | 0.05 | 0.15  |
| 23532 | PRAME    | 0.06 | 0.14 | 0.15 | 0.03  |
| 23536 | ADAT1    | 0.00 | 0.00 | 0.00 | NaN   |
| 23538 | OR52A1   | 0.00 | 0.00 | 0.05 | -0.04 |
| 23539 | SLC16A8  | 0.00 | 0.14 | 0.00 | 0.12  |
| 23541 | SEC14L2  | 0.00 | 0.29 | 0.05 | -0.03 |
| 23543 | RBM9     | 0.00 | 0.29 | 0.05 | 0.04  |
| 23544 | SEZ6L    | 0.00 | 0.14 | 0.05 | -0.04 |
| 23545 | ATP6V0A2 | 0.02 | 0.00 | 0.10 | 0.05  |
| 23546 | SYNGR4   | 0.02 | 0.00 | 0.00 | 0.04  |
| 23549 | DNPEP    | 0.04 | 0.00 | 0.00 | 0.17  |
| 23552 | CCRK     | 0.00 | 0.00 | 0.00 | NaN   |
| 23553 | HYAL4    | 0.00 | 0.00 | 0.00 | NaN   |

|       |           |      |      |      |       |
|-------|-----------|------|------|------|-------|
| 23556 | PIGN      | 0.02 | 0.00 | 0.00 | -0.06 |
| 23558 | WBP2      | 0.02 | 0.14 | 0.05 | 0.06  |
| 23562 | CLDN14    | 0.00 | 0.00 | 0.00 | NaN   |
| 23563 | CHST5     | 0.00 | 0.00 | 0.00 | NaN   |
| 23564 | DDAH2     | 0.02 | 0.00 | 0.05 | 0.35  |
| 23583 | SMUG1     | 0.02 | 0.00 | 0.05 | -0.18 |
| 23594 | ORC6L     | 0.43 | 0.29 | 0.15 | -0.24 |
| 23595 | ORC3L     | 0.00 | 0.00 | 0.05 | -0.13 |
| 23596 | OPN3      | 0.02 | 0.00 | 0.10 | 0.01  |
| 23600 | AMACR     | 0.02 | 0.14 | 0.05 | 0.06  |
| 23603 | CORO1C    | 0.02 | 0.00 | 0.00 | 0.02  |
| 23604 | DAPK2     | 0.02 | 0.00 | 0.00 | 0.03  |
| 23607 | CD2AP     | 0.00 | 0.00 | 0.00 | NaN   |
| 23608 | MKRN1     | 0.00 | 0.00 | 0.00 | NaN   |
| 23609 | MKRN2     | 0.00 | 0.00 | 0.05 | 0.11  |
| 23612 | PHLDA3    | 0.00 | 0.00 | 0.05 | 0.02  |
| 23614 | PPY2      | 0.10 | 0.00 | 0.05 | 0.12  |
| 23615 | PYY2      | 0.10 | 0.00 | 0.05 | -0.05 |
| 23616 | SH3BP1    | 0.00 | 0.14 | 0.00 | 0.10  |
| 23619 | ZIM2      | 0.00 | 0.00 | 0.05 | 0.03  |
| 23620 | NTSR2     | 0.00 | 0.00 | 0.00 | NaN   |
| 23624 | CBLC      | 0.00 | 0.00 | 0.00 | NaN   |
| 23632 | CA14      | 0.02 | 0.00 | 0.10 | -0.07 |
| 23633 | KPNA6     | 0.00 | 0.14 | 0.05 | 0.00  |
| 23635 | SSBP2     | 0.00 | 0.00 | 0.00 | NaN   |
| 23636 | NUP62     | 0.02 | 0.00 | 0.05 | 0.38  |
| 23640 | HSPBP1    | 0.02 | 0.00 | 0.05 | 0.26  |
| 23645 | PPP1R15A  | 0.06 | 0.00 | 0.05 | 0.29  |
| 23649 | POLA2     | 0.02 | 0.00 | 0.00 | -0.06 |
| 23650 | TRIM29    | 0.00 | 0.00 | 0.00 | NaN   |
| 23654 | PLXNB2    | 0.02 | 0.14 | 0.05 | -0.02 |
| 23657 | SLC7A11   | 0.02 | 0.00 | 0.00 | -0.03 |
| 23658 | LSM5      | 0.02 | 0.00 | 0.00 | 0.18  |
| 23670 | TMEM2     | 0.00 | 0.00 | 0.00 | NaN   |
| 23673 | STX12     | 0.04 | 0.00 | 0.00 | 0.00  |
| 23677 | SH3BP4    | 0.02 | 0.00 | 0.00 | -0.01 |
| 23682 | RAB38     | 0.00 | 0.00 | 0.00 | NaN   |
| 23710 | GABARAPL1 | 0.02 | 0.00 | 0.15 | 0.14  |
| 23733 | C9orf3    | 0.00 | 0.00 | 0.00 | NaN   |
| 23742 | C15orf2   | 0.00 | 0.14 | 0.00 | 0.03  |
| 23743 | BHMT2     | 0.00 | 0.00 | 0.00 | NaN   |
| 23746 | AIPL1     | 0.04 | 0.00 | 0.10 | -0.04 |
| 23753 | SDF2L1    | 0.06 | 0.14 | 0.15 | 0.10  |
| 23759 | PPIL2     | 0.06 | 0.14 | 0.15 | 0.15  |
| 23761 | PISD      | 0.00 | 0.29 | 0.05 | -0.01 |
| 23762 | OSBP2     | 0.00 | 0.29 | 0.05 | 0.01  |
| 23764 | MAFF      | 0.00 | 0.14 | 0.00 | 0.02  |

|       |             |      |      |      |       |
|-------|-------------|------|------|------|-------|
| 23767 | FLRT3       | 0.00 | 0.14 | 0.00 | -0.06 |
| 23768 | FLRT2       | 0.02 | 0.00 | 0.00 | -0.02 |
| 23769 | FLRT1       | 0.02 | 0.00 | 0.00 | -0.10 |
| 23770 | FKBP8       | 0.02 | 0.00 | 0.00 | 0.24  |
| 23774 | BRD1        | 0.02 | 0.14 | 0.05 | -0.01 |
| 23779 | ARHGAP8     | 0.00 | 0.14 | 0.05 | 0.08  |
| 23780 | APOL2       | 0.00 | 0.14 | 0.00 | 0.26  |
| 23787 | MTCH1       | 0.04 | 0.00 | 0.00 | -0.20 |
| 23788 | MTCH2       | 0.04 | 0.00 | 0.00 | -0.29 |
| 24139 | EML2        | 0.00 | 0.00 | 0.05 | 0.02  |
| 24141 | C20orf103   | 0.00 | 0.00 | 0.05 | 0.00  |
| 24145 | PANX1       | 0.00 | 0.00 | 0.00 | NaN   |
| 24146 | CLDN15      | 0.00 | 0.14 | 0.00 | 0.04  |
| 24147 | FJX1        | 0.00 | 0.00 | 0.10 | 0.14  |
| 24150 | TP53TG3     | 0.43 | 0.29 | 0.15 | 0.07  |
| 25764 | HYPK        | 0.04 | 0.00 | 0.00 | -0.01 |
| 25769 | SLC24A2     | 0.02 | 0.00 | 0.05 | -0.01 |
| 25788 | RAD54B      | 0.08 | 0.00 | 0.05 | 0.37  |
| 25792 | CIZ1        | 0.00 | 0.00 | 0.00 | NaN   |
| 25793 | FBXO7       | 0.00 | 0.29 | 0.05 | 0.05  |
| 25794 | FSCN2       | 0.00 | 0.00 | 0.00 | NaN   |
| 25796 | PGLS        | 0.04 | 0.00 | 0.00 | 0.55  |
| 25797 | QPCT        | 0.00 | 0.00 | 0.00 | NaN   |
| 25801 | GCA         | 0.02 | 0.00 | 0.00 | 0.02  |
| 25802 | LMOD1       | 0.02 | 0.00 | 0.00 | 0.08  |
| 25804 | LSM4        | 0.02 | 0.00 | 0.00 | 0.16  |
| 25806 | VAX2        | 0.00 | 0.00 | 0.05 | -0.13 |
| 25809 | TTLL1       | 0.00 | 0.14 | 0.05 | -0.05 |
| 25819 | CCRN4L      | 0.00 | 0.00 | 0.05 | -0.04 |
| 25820 | ARIH1       | 0.04 | 0.00 | 0.05 | 0.20  |
| 25821 | MTO1        | 0.02 | 0.00 | 0.00 | -0.01 |
| 25822 | DNAJB5      | 0.00 | 0.00 | 0.00 | NaN   |
| 25823 | TPSG1       | 0.18 | 0.00 | 0.10 | 0.04  |
| 25825 | BACE2       | 0.00 | 0.00 | 0.05 | 0.03  |
| 25827 | FBXL2       | 0.06 | 0.00 | 0.05 | 0.01  |
| 25828 | TXN2        | 0.00 | 0.14 | 0.00 | 0.00  |
| 25830 | SULT4A1     | 0.00 | 0.14 | 0.05 | -0.02 |
| 25837 | RAB26       | 0.18 | 0.00 | 0.10 | 0.09  |
| 25839 | COG4        | 0.00 | 0.00 | 0.00 | NaN   |
| 25849 | DKFZP564O08 | 0.00 | 0.00 | 0.00 | NaN   |
| 25850 | ZNF345      | 0.02 | 0.00 | 0.05 | 0.08  |
| 25855 | BRMS1       | 0.04 | 0.00 | 0.05 | 0.12  |
| 25859 | PART1       | 0.00 | 0.00 | 0.05 | 0.03  |
| 25873 | RPL36       | 0.02 | 0.00 | 0.15 | 0.00  |
| 25913 | POT1        | 0.00 | 0.00 | 0.00 | NaN   |
| 25932 | CLIC4       | 0.02 | 0.00 | 0.05 | 0.09  |
| 25939 | SAMHD1      | 0.04 | 0.00 | 0.00 | 0.03  |

|       |             |      |      |      |       |
|-------|-------------|------|------|------|-------|
| 25980 | C20orf4     | 0.04 | 0.00 | 0.00 | 0.39  |
| 25998 | IBTK        | 0.10 | 0.00 | 0.20 | -0.06 |
| 26031 | OSBPL3      | 0.00 | 0.00 | 0.05 | 0.20  |
| 26039 | SS18L1      | 0.08 | 0.00 | 0.05 | 0.21  |
| 26040 | SETBP1      | 0.02 | 0.00 | 0.00 | -0.21 |
| 26047 | CNTNAP2     | 0.02 | 0.00 | 0.00 | 0.02  |
| 26051 | PPP1R16B    | 0.06 | 0.00 | 0.05 | 0.14  |
| 26063 | DECR2       | 0.18 | 0.00 | 0.10 | -0.10 |
| 26064 | RAI14       | 0.02 | 0.14 | 0.05 | 0.12  |
| 26082 | DKFZP434L18 | 0.00 | 0.00 | 0.00 | NaN   |
| 26085 | KLK13       | 0.02 | 0.00 | 0.05 | 0.03  |
| 26088 | GGA1        | 0.00 | 0.14 | 0.00 | 0.21  |
| 26108 | PYGO1       | 0.00 | 0.00 | 0.00 | NaN   |
| 26118 | WSB1        | 0.10 | 0.00 | 0.05 | 0.11  |
| 26121 | PRPF31      | 0.02 | 0.00 | 0.05 | -0.01 |
| 26136 | TES         | 0.00 | 0.00 | 0.00 | NaN   |
| 26152 | ZNF337      | 0.04 | 0.00 | 0.15 | -0.04 |
| 26154 | ABCA12      | 0.02 | 0.00 | 0.00 | 0.02  |
| 26168 | SENP3       | 0.02 | 0.00 | 0.00 | -0.07 |
| 26189 | OR1A2       | 0.04 | 0.00 | 0.10 | -0.07 |
| 26190 | FBXW2       | 0.02 | 0.00 | 0.00 | 0.06  |
| 26191 | PTPN22      | 0.02 | 0.00 | 0.05 | 0.19  |
| 26205 | GMEB2       | 0.08 | 0.00 | 0.05 | 0.30  |
| 26206 | SPAG8       | 0.00 | 0.00 | 0.00 | NaN   |
| 26211 | OR2F1       | 0.04 | 0.00 | 0.05 | -0.03 |
| 26220 | DGCR5       | 0.02 | 0.14 | 0.20 | 0.18  |
| 26227 | PHGDH       | 0.41 | 0.43 | 0.10 | -0.25 |
| 26229 | B3GAT3      | 0.00 | 0.00 | 0.05 | 0.03  |
| 26230 | TIAM2       | 0.04 | 0.00 | 0.05 | 0.12  |
| 26232 | FBXO2       | 0.02 | 0.00 | 0.00 | 0.31  |
| 26233 | FBXL6       | 0.10 | 0.00 | 0.15 | 0.32  |
| 26234 | FBXL5       | 0.00 | 0.00 | 0.00 | NaN   |
| 26235 | FBXL4       | 0.08 | 0.00 | 0.00 | 0.06  |
| 26249 | KLHL3       | 0.02 | 0.00 | 0.00 | -0.08 |
| 26251 | KCNG2       | 0.02 | 0.00 | 0.05 | -0.08 |
| 26255 | PTTG3       | 0.00 | 0.00 | 0.00 | NaN   |
| 26256 | CABYR       | 0.00 | 0.00 | 0.10 | 0.02  |
| 26261 | FBXO24      | 0.00 | 0.00 | 0.00 | NaN   |
| 26263 | FBXO22      | 0.00 | 0.00 | 0.05 | -0.06 |
| 26266 | SLC13A4     | 0.00 | 0.00 | 0.10 | -0.07 |
| 26268 | FBXO9       | 0.02 | 0.00 | 0.00 | 0.25  |
| 26271 | FBXO5       | 0.02 | 0.00 | 0.05 | 0.03  |
| 26273 | FBXO3       | 0.02 | 0.00 | 0.00 | -0.12 |
| 26275 | HIBCH       | 0.00 | 0.00 | 0.05 | -0.22 |
| 26276 | VPS33B      | 0.02 | 0.00 | 0.10 | -0.06 |
| 26277 | TINF2       | 0.02 | 0.14 | 0.10 | 0.14  |
| 26278 | SACS        | 0.02 | 0.00 | 0.00 | -0.03 |



|       |          |      |      |      |       |
|-------|----------|------|------|------|-------|
| 26279 | PLA2G2D  | 0.02 | 0.00 | 0.05 | -0.01 |
| 26281 | FGF20    | 0.00 | 0.00 | 0.10 | -0.07 |
| 26284 | ERAL1    | 0.10 | 0.00 | 0.05 | 0.10  |
| 26285 | CLDN17   | 0.18 | 0.14 | 0.00 | 0.24  |
| 26286 | ARFGAP1  | 0.08 | 0.00 | 0.05 | -0.16 |
| 26287 | ANKRD2   | 0.00 | 0.14 | 0.00 | 0.09  |
| 26289 | AK5      | 0.06 | 0.00 | 0.00 | -0.06 |
| 26290 | GALNT8   | 0.02 | 0.00 | 0.00 | -0.10 |
| 26291 | FGF21    | 0.06 | 0.00 | 0.05 | 0.23  |
| 26292 | MYCBP    | 0.04 | 0.00 | 0.05 | 0.03  |
| 26298 | EHF      | 0.02 | 0.00 | 0.00 | -0.06 |
| 26333 | OR7A17   | 0.00 | 0.00 | 0.05 | -0.07 |
| 26468 | LHX6     | 0.06 | 0.00 | 0.00 | -0.04 |
| 26469 | PTPN18   | 0.00 | 0.00 | 0.10 | -0.23 |
| 26472 | PPP1R14B | 0.02 | 0.00 | 0.00 | -0.03 |
| 26476 | OR10J1   | 0.00 | 0.00 | 0.00 | NaN   |
| 26499 | PLEK2    | 0.00 | 0.00 | 0.05 | -0.03 |
| 26502 | NARF     | 0.00 | 0.00 | 0.00 | NaN   |
| 26503 | SLC17A5  | 0.02 | 0.00 | 0.00 | -0.09 |
| 26504 | CNNM4    | 0.00 | 0.00 | 0.10 | -0.04 |
| 26505 | CNNM3    | 0.00 | 0.00 | 0.10 | -0.20 |
| 26507 | CNNM1    | 0.00 | 0.00 | 0.00 | NaN   |
| 26508 | HEYL     | 0.02 | 0.00 | 0.05 | -0.03 |
| 26511 | CHIC2    | 0.00 | 0.00 | 0.00 | NaN   |
| 26515 | FXC1     | 0.00 | 0.00 | 0.00 | NaN   |
| 26517 | TIMM13   | 0.02 | 0.00 | 0.05 | 0.07  |
| 26519 | TIMM10   | 0.00 | 0.00 | 0.00 | NaN   |
| 26520 | TIMM9    | 0.02 | 0.14 | 0.00 | -0.02 |
| 26521 | TIMM8B   | 0.02 | 0.00 | 0.00 | 0.03  |
| 26523 | EIF2C1   | 0.00 | 0.00 | 0.00 | NaN   |
| 26528 | DAZAP1   | 0.02 | 0.00 | 0.05 | 0.10  |
| 26529 | OR12D2   | 0.04 | 0.14 | 0.05 | -0.08 |
| 26531 | OR11A1   | 0.04 | 0.14 | 0.05 | 0.04  |
| 26532 | OR10H3   | 0.04 | 0.00 | 0.00 | -0.03 |
| 26538 | OR10H2   | 0.04 | 0.00 | 0.00 | 0.05  |
| 26539 | OR10H1   | 0.04 | 0.00 | 0.00 | -0.01 |
| 26542 | OR10C1   | 0.04 | 0.14 | 0.05 | 0.06  |
| 26575 | RGS17    | 0.02 | 0.00 | 0.05 | -0.01 |
| 26577 | PCOLCE2  | 0.02 | 0.00 | 0.00 | -0.05 |
| 26578 | OSTF1    | 0.00 | 0.00 | 0.00 | NaN   |
| 26586 | CKAP2    | 0.04 | 0.00 | 0.10 | 0.06  |
| 26589 | MRPL46   | 0.00 | 0.00 | 0.00 | NaN   |
| 26608 | TBL2     | 0.00 | 0.00 | 0.00 | NaN   |
| 26658 | OR7C2    | 0.04 | 0.00 | 0.00 | -0.06 |
| 26659 | OR7C1    | 0.00 | 0.00 | 0.05 | -0.11 |
| 26692 | OR2W1    | 0.04 | 0.14 | 0.05 | 0.11  |
| 26707 | OR2J2    | 0.04 | 0.14 | 0.05 | -0.16 |

|       |         |      |      |      |       |
|-------|---------|------|------|------|-------|
| 26747 | NUFIP1  | 0.00 | 0.00 | 0.00 | NaN   |
| 26750 | RPS6KC1 | 0.02 | 0.00 | 0.15 | 0.17  |
| 26873 | OPLAH   | 0.10 | 0.00 | 0.15 | 0.37  |
| 26953 | RANBP6  | 0.02 | 0.00 | 0.00 | 0.20  |
| 26959 | HBP1    | 0.00 | 0.00 | 0.00 | NaN   |
| 26960 | NBEA    | 0.02 | 0.00 | 0.00 | 0.03  |
| 26973 | CHORDC1 | 0.00 | 0.00 | 0.00 | NaN   |
| 26984 | SEC22A  | 0.00 | 0.00 | 0.10 | 0.18  |
| 26986 | PABPC1  | 0.12 | 0.00 | 0.25 | 0.17  |
| 26994 | RNF11   | 0.02 | 0.00 | 0.00 | 0.12  |
| 26998 | FETUB   | 0.02 | 0.14 | 0.00 | 0.00  |
| 26999 | CYFIP2  | 0.00 | 0.00 | 0.00 | NaN   |
| 27004 | TCL6    | 0.00 | 0.00 | 0.05 | 0.10  |
| 27005 | USP21   | 0.00 | 0.00 | 0.00 | NaN   |
| 27006 | FGF22   | 0.06 | 0.00 | 0.15 | 0.01  |
| 27010 | TPK1    | 0.02 | 0.00 | 0.05 | 0.03  |
| 27019 | DNAI1   | 0.04 | 0.00 | 0.00 | 0.10  |
| 27022 | FOXD3   | 0.04 | 0.00 | 0.00 | 0.00  |
| 27023 | FOXB1   | 0.00 | 0.00 | 0.00 | NaN   |
| 27030 | MLH3    | 0.00 | 0.00 | 0.00 | NaN   |
| 27032 | ATP2C1  | 0.02 | 0.00 | 0.00 | 0.06  |
| 27034 | ACAD8   | 0.00 | 0.00 | 0.00 | NaN   |
| 27036 | SIGLEC7 | 0.02 | 0.00 | 0.05 | 0.02  |
| 27039 | PKD2L2  | 0.02 | 0.00 | 0.00 | -0.13 |
| 27040 | LAT     | 0.06 | 0.14 | 0.00 | 0.10  |
| 27043 | PELP1   | 0.04 | 0.00 | 0.10 | 0.08  |
| 27065 | D4S234E | 0.00 | 0.00 | 0.00 | NaN   |
| 27067 | STAU2   | 0.02 | 0.00 | 0.00 | 0.03  |
| 27069 | GHITM   | 0.06 | 0.14 | 0.05 | 0.10  |
| 27071 | DAPP1   | 0.00 | 0.00 | 0.00 | NaN   |
| 27072 | VPS41   | 0.00 | 0.00 | 0.00 | NaN   |
| 27074 | LAMP3   | 0.00 | 0.00 | 0.10 | 0.17  |
| 27087 | B3GAT1  | 0.00 | 0.00 | 0.00 | NaN   |
| 27091 | CACNG5  | 0.12 | 0.00 | 0.20 | 0.10  |
| 27094 | KCNMB3  | 0.00 | 0.00 | 0.00 | NaN   |
| 27097 | TAF5L   | 0.00 | 0.00 | 0.05 | 0.08  |
| 27098 | CLUL1   | 0.02 | 0.00 | 0.05 | 0.17  |
| 27113 | BBC3    | 0.00 | 0.00 | 0.05 | -0.06 |
| 27115 | PDE7B   | 0.00 | 0.00 | 0.00 | NaN   |
| 27121 | DKK4    | 0.04 | 0.14 | 0.05 | -0.04 |
| 27122 | DKK3    | 0.04 | 0.00 | 0.00 | 0.19  |
| 27123 | DKK2    | 0.08 | 0.00 | 0.00 | 0.05  |
| 27129 | HSPB7   | 0.02 | 0.00 | 0.00 | -0.02 |
| 27130 | INVS    | 0.04 | 0.00 | 0.00 | 0.17  |
| 27131 | SNX5    | 0.00 | 0.00 | 0.00 | NaN   |
| 27132 | CPNE7   | 0.00 | 0.00 | 0.10 | -0.07 |
| 27134 | TJP3    | 0.02 | 0.00 | 0.15 | -0.25 |

|       |          |      |      |      |       |
|-------|----------|------|------|------|-------|
| 27141 | CIDEB    | 0.02 | 0.14 | 0.10 | -0.02 |
| 27156 | RTDR1    | 0.06 | 0.14 | 0.15 | 0.08  |
| 27173 | SLC39A1  | 0.02 | 0.00 | 0.10 | -0.14 |
| 27175 | TUBG2    | 0.02 | 0.86 | 0.05 | 0.01  |
| 27180 | SIGLEC9  | 0.02 | 0.00 | 0.05 | -0.03 |
| 27181 | SIGLEC8  | 0.02 | 0.00 | 0.05 | -0.09 |
| 27183 | VPS4A    | 0.00 | 0.00 | 0.00 | NaN   |
| 27185 | DISC1    | 0.00 | 0.00 | 0.00 | NaN   |
| 27190 | IL17B    | 0.00 | 0.14 | 0.05 | -0.15 |
| 27230 | SERP1    | 0.02 | 0.00 | 0.05 | -0.11 |
| 27232 | GNMT     | 0.06 | 0.00 | 0.05 | 0.02  |
| 27233 | SULT1C2  | 0.02 | 0.00 | 0.00 | 0.16  |
| 27242 | TNFRSF21 | 0.02 | 0.00 | 0.00 | 0.03  |
| 27250 | PDCD4    | 0.00 | 0.14 | 0.00 | -0.01 |
| 27253 | PCDH17   | 0.04 | 0.00 | 0.10 | 0.10  |
| 27255 | CNTN6    | 0.20 | 0.29 | 0.30 | -0.05 |
| 27257 | LSM1     | 0.08 | 0.00 | 0.00 | 0.57  |
| 27258 | LSM3     | 0.00 | 0.00 | 0.05 | -0.29 |
| 27284 | SULT1B1  | 0.00 | 0.14 | 0.00 | 0.13  |
| 27285 | TEKT2    | 0.00 | 0.00 | 0.00 | NaN   |
| 27290 | SPINK4   | 0.04 | 0.00 | 0.00 | -0.12 |
| 27299 | ADAMDEC1 | 0.00 | 0.00 | 0.00 | NaN   |
| 27302 | BMP10    | 0.00 | 0.14 | 0.00 | -0.17 |
| 27303 | RBMS3    | 0.00 | 0.00 | 0.05 | -0.10 |
| 27304 | MOCS3    | 0.10 | 0.00 | 0.00 | 0.40  |
| 27306 | PGDS     | 0.04 | 0.00 | 0.05 | -0.05 |
| 27314 | RAB30    | 0.00 | 0.00 | 0.00 | NaN   |
| 27315 | FRAG1    | 0.00 | 0.00 | 0.05 | 0.18  |
| 27329 | ANGPTL3  | 0.04 | 0.00 | 0.00 | -0.12 |
| 27343 | POLL     | 0.02 | 0.00 | 0.00 | 0.17  |
| 27345 | KCNMB4   | 0.12 | 0.00 | 0.05 | 0.15  |
| 27347 | STK39    | 0.00 | 0.00 | 0.00 | NaN   |
| 27430 | MAT2B    | 0.00 | 0.00 | 0.00 | NaN   |
| 27434 | POLM     | 0.00 | 0.00 | 0.00 | NaN   |
| 27436 | EML4     | 0.02 | 0.00 | 0.05 | 0.01  |
| 27440 | CECR5    | 0.02 | 0.14 | 0.20 | 0.20  |
| 27445 | PCLO     | 0.02 | 0.00 | 0.00 | -0.06 |
| 28316 | CDH20    | 0.02 | 0.00 | 0.00 | -0.06 |
| 28513 | CDH19    | 0.02 | 0.00 | 0.00 | -0.01 |
| 28957 | MRPS28   | 0.10 | 0.00 | 0.05 | 0.23  |
| 28964 | GIT1     | 0.10 | 0.00 | 0.05 | -0.01 |
| 28973 | MRPS18B  | 0.04 | 0.14 | 0.05 | 0.04  |
| 28977 | MRPL42   | 0.00 | 0.00 | 0.00 | NaN   |
| 28996 | HIPK2    | 0.00 | 0.00 | 0.05 | 0.03  |
| 28997 | PROO611  | 0.00 | 0.14 | 0.00 | 0.10  |
| 28998 | MRPL13   | 0.10 | 0.00 | 0.15 | 0.19  |
| 28999 | KLF15    | 0.02 | 0.00 | 0.00 | 0.05  |

|       |          |      |      |      |       |
|-------|----------|------|------|------|-------|
| 29018 | PRO1768  | 0.00 | 0.00 | 0.00 | NaN   |
| 29053 | PRO0628  | 0.04 | 0.00 | 0.00 | 0.03  |
| 29058 | C20orf30 | 0.00 | 0.00 | 0.10 | -0.03 |
| 29074 | MRPL18   | 0.04 | 0.00 | 0.05 | -0.05 |
| 29075 | HSPC072  | 0.04 | 0.00 | 0.05 | -0.05 |
| 29088 | MRPL15   | 0.00 | 0.00 | 0.00 | NaN   |
| 29092 | HSPC157  | 0.00 | 0.00 | 0.05 | 0.15  |
| 29093 | MRPL22   | 0.02 | 0.00 | 0.00 | 0.14  |
| 29094 | HSPC159  | 0.00 | 0.00 | 0.00 | NaN   |
| 29104 | N6AMT1   | 0.02 | 0.00 | 0.00 | 0.19  |
| 29106 | SCG3     | 0.00 | 0.00 | 0.00 | NaN   |
| 29107 | NXT1     | 0.00 | 0.00 | 0.00 | NaN   |
| 29109 | FHOD1    | 0.02 | 0.00 | 0.00 | 0.06  |
| 29110 | TBK1     | 0.04 | 0.14 | 0.00 | 0.40  |
| 29117 | BRD7     | 0.08 | 0.00 | 0.05 | -0.08 |
| 29122 | TSP50    | 0.02 | 0.14 | 0.15 | 0.12  |
| 29125 | C11orf21 | 0.00 | 0.00 | 0.00 | NaN   |
| 29127 | RACGAP1  | 0.02 | 0.00 | 0.00 | -0.09 |
| 29760 | BLNK     | 0.00 | 0.00 | 0.00 | NaN   |
| 29761 | USP25    | 0.00 | 0.00 | 0.10 | 0.21  |
| 29763 | PAC3IN3  | 0.02 | 0.00 | 0.00 | -0.11 |
| 29766 | TMOD3    | 0.00 | 0.00 | 0.00 | NaN   |
| 29767 | TMOD2    | 0.00 | 0.00 | 0.00 | NaN   |
| 29775 | CARD10   | 0.00 | 0.14 | 0.00 | 0.00  |
| 29777 | ABT1     | 0.00 | 0.14 | 0.00 | 0.07  |
| 29780 | PARVB    | 0.00 | 0.14 | 0.05 | 0.05  |
| 29802 | VPREB3   | 0.00 | 0.14 | 0.05 | 0.04  |
| 29844 | TFPT     | 0.02 | 0.00 | 0.05 | -0.03 |
| 29851 | ICOS     | 0.00 | 0.00 | 0.00 | NaN   |
| 29855 | UBN1     | 0.00 | 0.00 | 0.00 | NaN   |
| 29880 | ALG5     | 0.02 | 0.00 | 0.00 | -0.13 |
| 29881 | NPC1L1   | 0.02 | 0.00 | 0.00 | -0.05 |
| 29882 | APC2     | 0.02 | 0.00 | 0.05 | -0.14 |
| 29883 | CNOT7    | 0.00 | 0.00 | 0.10 | 0.12  |
| 29887 | SNX10    | 0.00 | 0.00 | 0.00 | NaN   |
| 29894 | CPSF1    | 0.10 | 0.00 | 0.15 | 0.28  |
| 29907 | SNX15    | 0.02 | 0.00 | 0.00 | -0.04 |
| 29911 | HOOK2    | 0.06 | 0.14 | 0.00 | 0.01  |
| 29916 | SNX11    | 0.04 | 0.00 | 0.05 | 0.05  |
| 29922 | NME7     | 0.02 | 0.00 | 0.00 | -0.10 |
| 29925 | GMPPB    | 0.06 | 0.00 | 0.05 | 0.07  |
| 29926 | GMPPA    | 0.04 | 0.00 | 0.00 | 0.02  |
| 29927 | SEC61A1  | 0.04 | 0.00 | 0.00 | 0.36  |
| 29928 | TIMM22   | 0.00 | 0.00 | 0.00 | NaN   |
| 29929 | ALG6     | 0.04 | 0.00 | 0.00 | 0.15  |
| 29930 | PCDHB1   | 0.00 | 0.00 | 0.00 | NaN   |
| 29942 | PURG     | 0.04 | 0.00 | 0.00 | -0.03 |

|       |           |      |      |      |       |
|-------|-----------|------|------|------|-------|
| 29943 | PADI1     | 0.02 | 0.00 | 0.00 | -0.02 |
| 29947 | DNMT3L    | 0.02 | 0.00 | 0.00 | -0.12 |
| 29949 | IL19      | 0.00 | 0.00 | 0.05 | -0.01 |
| 29953 | TRHDE     | 0.12 | 0.00 | 0.05 | -0.08 |
| 29954 | POMT2     | 0.00 | 0.00 | 0.00 | NaN   |
| 29956 | LASS2     | 0.02 | 0.00 | 0.10 | -0.30 |
| 29960 | FTSJ2     | 0.00 | 0.00 | 0.00 | NaN   |
| 29965 | C16orf5   | 0.00 | 0.00 | 0.00 | NaN   |
| 29970 | SCHIP1    | 0.02 | 0.00 | 0.10 | 0.03  |
| 29980 | DONSON    | 0.00 | 0.00 | 0.00 | NaN   |
| 29986 | SLC39A2   | 0.02 | 0.00 | 0.00 | -0.04 |
| 29988 | SLC2A8    | 0.02 | 0.00 | 0.00 | -0.04 |
| 29989 | OBP2B     | 0.04 | 0.00 | 0.00 | -0.07 |
| 29994 | BAZ2B     | 0.00 | 0.00 | 0.05 | -0.17 |
| 29995 | LMCD1     | 0.00 | 0.00 | 0.05 | -0.08 |
| 29997 | GLTSCR2   | 0.00 | 0.00 | 0.00 | NaN   |
| 29998 | GLTSCR1   | 0.00 | 0.00 | 0.00 | NaN   |
| 29999 | FSCN3     | 0.02 | 0.00 | 0.00 | -0.13 |
| 30001 | ERO1L     | 0.02 | 0.00 | 0.00 | 0.28  |
| 30008 | EFEMP2    | 0.04 | 0.00 | 0.05 | -0.05 |
| 30009 | TBX21     | 0.00 | 0.00 | 0.00 | NaN   |
| 30013 | S100A14   | 0.02 | 0.00 | 0.10 | 0.00  |
| 30811 | HUNK      | 0.00 | 0.00 | 0.00 | NaN   |
| 30813 | VSX1      | 0.04 | 0.00 | 0.15 | -0.13 |
| 30814 | PLA2G2E   | 0.02 | 0.00 | 0.05 | 0.56  |
| 30817 | EMR2      | 0.00 | 0.00 | 0.05 | 0.00  |
| 30819 | KCNIP2    | 0.02 | 0.00 | 0.00 | -0.07 |
| 30820 | KCNIP1    | 0.02 | 0.00 | 0.00 | -0.08 |
| 30835 | CD209     | 0.02 | 0.00 | 0.15 | 0.33  |
| 30844 | EHD4      | 0.00 | 0.00 | 0.00 | NaN   |
| 30845 | EHD3      | 0.00 | 0.00 | 0.00 | NaN   |
| 30846 | EHD2      | 0.00 | 0.00 | 0.00 | NaN   |
| 30849 | PIK3R4    | 0.02 | 0.00 | 0.00 | 0.01  |
| 43847 | KLK14     | 0.02 | 0.00 | 0.05 | 0.01  |
| 50485 | SMARCAL1  | 0.02 | 0.00 | 0.00 | -0.09 |
| 50486 | GOS2      | 0.02 | 0.00 | 0.00 | -0.03 |
| 50487 | PLA2G3    | 0.00 | 0.29 | 0.05 | 0.03  |
| 50506 | DUOX2     | 0.02 | 0.00 | 0.05 | 0.05  |
| 50507 | NOX4      | 0.00 | 0.00 | 0.00 | NaN   |
| 50508 | NOX3      | 0.04 | 0.00 | 0.05 | 0.01  |
| 50509 | COL5A3    | 0.02 | 0.00 | 0.15 | -0.09 |
| 50514 | 12/1/2010 | 0.02 | 0.00 | 0.00 | -0.01 |
| 50613 | UBQLN3    | 0.02 | 0.00 | 0.00 | -0.03 |
| 50615 | IL21R     | 0.06 | 0.14 | 0.00 | -0.06 |
| 50616 | IL22      | 0.08 | 0.14 | 0.05 | 0.14  |
| 50617 | ATP6V0A4  | 0.00 | 0.00 | 0.00 | NaN   |
| 50618 | ITSN2     | 0.00 | 0.00 | 0.00 | NaN   |

|       |          |      |      |      |       |
|-------|----------|------|------|------|-------|
| 50619 | DEF6     | 0.04 | 0.00 | 0.00 | -0.09 |
| 50626 | CYHR1    | 0.10 | 0.00 | 0.15 | 0.18  |
| 50649 | ARHGEF4  | 0.00 | 0.00 | 0.10 | 0.11  |
| 50650 | ARHGEF3  | 0.00 | 0.00 | 0.05 | 0.26  |
| 50674 | NEUROG3  | 0.00 | 0.00 | 0.00 | NaN   |
| 50700 | RDH8     | 0.02 | 0.00 | 0.15 | 0.21  |
| 50801 | KCNK4    | 0.02 | 0.00 | 0.00 | -0.03 |
| 50805 | IRX4     | 0.00 | 0.00 | 0.00 | NaN   |
| 50813 | COPS7A   | 0.02 | 0.00 | 0.15 | 0.03  |
| 50831 | TAS2R3   | 0.00 | 0.14 | 0.05 | -0.11 |
| 50832 | TAS2R4   | 0.00 | 0.14 | 0.05 | 0.09  |
| 50833 | TAS2R16  | 0.00 | 0.00 | 0.00 | NaN   |
| 50834 | TAS2R1   | 0.00 | 0.00 | 0.00 | NaN   |
| 50835 | TAS2R9   | 0.02 | 0.00 | 0.15 | -0.16 |
| 50836 | TAS2R8   | 0.02 | 0.00 | 0.15 | -0.11 |
| 50837 | TAS2R7   | 0.02 | 0.00 | 0.15 | -0.04 |
| 50838 | TAS2R13  | 0.02 | 0.00 | 0.15 | -0.02 |
| 50839 | TAS2R10  | 0.02 | 0.00 | 0.15 | 0.16  |
| 50840 | TAS2R14  | 0.02 | 0.00 | 0.15 | -0.09 |
| 50853 | VILL     | 0.00 | 0.00 | 0.15 | 0.17  |
| 50855 | PAR6A    | 0.00 | 0.00 | 0.00 | NaN   |
| 50861 | STMN3    | 0.08 | 0.00 | 0.05 | -0.16 |
| 50865 | HEBP1    | 0.04 | 0.00 | 0.00 | -0.12 |
| 50937 | CDON     | 0.02 | 0.00 | 0.00 | 0.01  |
| 50939 | IMPG2    | 0.00 | 0.00 | 0.00 | NaN   |
| 50940 | PDE11A   | 0.02 | 0.00 | 0.00 | 0.04  |
| 50944 | SHANK1   | 0.00 | 0.00 | 0.00 | NaN   |
| 51021 | MRPS16   | 0.00 | 0.00 | 0.00 | NaN   |
| 51022 | GLRX2    | 0.00 | 0.00 | 0.00 | NaN   |
| 51023 | MRPS18C  | 0.00 | 0.00 | 0.10 | -0.36 |
| 51025 | Magmas   | 0.00 | 0.00 | 0.00 | NaN   |
| 51050 | PI15     | 0.06 | 0.00 | 0.00 | -0.08 |
| 51056 | LAP3     | 0.00 | 0.00 | 0.00 | NaN   |
| 51065 | RPS27L   | 0.00 | 0.00 | 0.00 | NaN   |
| 51069 | MRPL2    | 0.06 | 0.00 | 0.05 | 0.25  |
| 51070 | NOSIP    | 0.02 | 0.00 | 0.05 | 0.17  |
| 51073 | MRPL4    | 0.02 | 0.00 | 0.15 | 0.08  |
| 51081 | MRPS7    | 0.02 | 0.14 | 0.00 | 0.27  |
| 51100 | SH3GLB1  | 0.04 | 0.00 | 0.05 | -0.01 |
| 51106 | TFB1M    | 0.04 | 0.00 | 0.05 | 0.07  |
| 51117 | COQ4     | 0.00 | 0.00 | 0.00 | NaN   |
| 51121 | RPL26L1  | 0.00 | 0.00 | 0.10 | -0.16 |
| 51127 | TRIM17   | 0.00 | 0.00 | 0.05 | -0.10 |
| 51129 | ANGPTL4  | 0.02 | 0.00 | 0.15 | -0.02 |
| 51135 | IRAK4    | 0.00 | 0.00 | 0.35 | -0.16 |
| 51138 | COPS4    | 0.00 | 0.00 | 0.10 | 0.16  |
| 51144 | HSD17B12 | 0.00 | 0.00 | 0.00 | NaN   |

|       |             |      |      |      |       |
|-------|-------------|------|------|------|-------|
| 51147 | ING4        | 0.02 | 0.00 | 0.15 | -0.03 |
| 51155 | HN1         | 0.02 | 0.14 | 0.00 | 0.31  |
| 51156 | SERPINA10   | 0.00 | 0.00 | 0.00 | NaN   |
| 51160 | VPS28       | 0.10 | 0.00 | 0.15 | 0.33  |
| 51163 | DBR1        | 0.00 | 0.00 | 0.00 | NaN   |
| 51164 | DCTN4       | 0.00 | 0.14 | 0.00 | -0.11 |
| 51168 | MYO15A      | 0.02 | 0.00 | 0.00 | 0.19  |
| 51176 | LEF1        | 0.08 | 0.00 | 0.00 | -0.05 |
| 51179 | HAO2        | 0.41 | 0.43 | 0.10 | 0.12  |
| 51181 | DCXR        | 0.00 | 0.00 | 0.00 | NaN   |
| 51188 | SS18L2      | 0.00 | 0.00 | 0.05 | -0.04 |
| 51196 | PLCE1       | 0.02 | 0.00 | 0.05 | 0.05  |
| 51199 | NIN         | 0.02 | 0.00 | 0.00 | -0.07 |
| 51200 | CPA4        | 0.00 | 0.00 | 0.00 | NaN   |
| 51206 | GP6         | 0.02 | 0.00 | 0.05 | 0.03  |
| 51208 | CLDN18      | 0.00 | 0.00 | 0.00 | NaN   |
| 51214 | IGF2AS      | 0.02 | 0.00 | 0.05 | 0.14  |
| 51222 | ZNF219      | 0.02 | 0.00 | 0.00 | -0.03 |
| 51232 | CRIM1       | 0.00 | 0.00 | 0.00 | NaN   |
| 51265 | CDKL3       | 0.00 | 0.00 | 0.00 | NaN   |
| 51268 | PIPOX       | 0.10 | 0.00 | 0.05 | -0.23 |
| 51274 | KLF3        | 0.04 | 0.00 | 0.10 | 0.06  |
| 51278 | IER5        | 0.04 | 0.00 | 0.10 | -0.05 |
| 51282 | SCAND1      | 0.06 | 0.14 | 0.05 | 0.37  |
| 51294 | PCDH12      | 0.00 | 0.00 | 0.00 | NaN   |
| 51297 | PLUNC       | 0.02 | 0.00 | 0.00 | -0.04 |
| 51298 | THEG        | 0.06 | 0.00 | 0.15 | 0.10  |
| 51302 | CYP39A1     | 0.04 | 0.14 | 0.20 | 0.20  |
| 51304 | ZDHHC3      | 0.04 | 0.00 | 0.10 | 0.14  |
| 51318 | MRPL35      | 0.04 | 0.00 | 0.05 | 0.16  |
| 51322 | WAC         | 0.00 | 0.00 | 0.00 | NaN   |
| 51327 | ERAF        | 0.02 | 0.00 | 0.00 | -0.06 |
| 51332 | SPTBN5      | 0.00 | 0.00 | 0.00 | NaN   |
| 51338 | MS4A4A      | 0.00 | 0.00 | 0.00 | NaN   |
| 51340 | CRNKL1      | 0.02 | 0.00 | 0.00 | -0.05 |
| 51343 | FZR1        | 0.02 | 0.00 | 0.15 | -0.14 |
| 51348 | KLRF1       | 0.02 | 0.00 | 0.15 | 0.05  |
| 51361 | HOOK1       | 0.06 | 0.00 | 0.00 | 0.29  |
| 51363 | GALNAC4S-6S | 0.04 | 0.00 | 0.05 | -0.04 |
| 51367 | POP5        | 0.02 | 0.00 | 0.10 | 0.13  |
| 51373 | MRPS17      | 0.04 | 0.14 | 0.20 | 0.12  |
| 51375 | SNX7        | 0.02 | 0.00 | 0.00 | -0.05 |
| 51378 | ANGPT4      | 0.00 | 0.00 | 0.00 | NaN   |
| 51379 | CRLF3       | 0.10 | 0.00 | 0.05 | -0.12 |
| 51380 | CSAD        | 0.00 | 0.00 | 0.00 | NaN   |
| 51382 | ATP6V1D     | 0.00 | 0.00 | 0.05 | -0.03 |
| 51384 | WNT16       | 0.02 | 0.00 | 0.10 | -0.18 |

|       |           |      |      |      |       |
|-------|-----------|------|------|------|-------|
| 51411 | BIN2      | 0.00 | 0.00 | 0.00 | NaN   |
| 51421 | AMOTL2    | 0.00 | 0.00 | 0.10 | 0.26  |
| 51422 | PRKAG2    | 0.02 | 0.00 | 0.00 | -0.08 |
| 51430 | C1orf9    | 0.04 | 0.00 | 0.05 | 0.27  |
| 51433 | ANAPC5    | 0.02 | 0.00 | 0.10 | 0.14  |
| 51439 | FAM8A1    | 0.04 | 0.00 | 0.10 | -0.05 |
| 51440 | HPCAL4    | 0.02 | 0.00 | 0.05 | -0.02 |
| 51458 | RHCG      | 0.00 | 0.00 | 0.00 | NaN   |
| 51475 | CABP2     | 0.02 | 0.00 | 0.00 | -0.03 |
| 51477 | ISYNA1    | 0.02 | 0.00 | 0.00 | 0.05  |
| 51478 | HSD17B7   | 0.00 | 0.00 | 0.00 | NaN   |
| 51497 | TH1L      | 0.12 | 0.00 | 0.00 | 0.51  |
| 51504 | HSPC152   | 0.02 | 0.00 | 0.00 | 0.18  |
| 51507 | C20orf43  | 0.06 | 0.00 | 0.00 | 0.21  |
| 51512 | GTSE1     | 0.02 | 0.14 | 0.05 | 0.11  |
| 51526 | C20orf111 | 0.02 | 0.00 | 0.10 | 0.32  |
| 51540 | SCLY      | 0.08 | 0.43 | 0.10 | 0.19  |
| 51547 | SIRT7     | 0.00 | 0.00 | 0.00 | NaN   |
| 51548 | SIRT6     | 0.02 | 0.00 | 0.15 | -0.11 |
| 51550 | CINP      | 0.02 | 0.00 | 0.00 | -0.03 |
| 51552 | RAB14     | 0.06 | 0.00 | 0.00 | 0.11  |
| 51554 | CCRL1     | 0.00 | 0.00 | 0.10 | -0.09 |
| 51560 | RAB6B     | 0.00 | 0.00 | 0.10 | 0.12  |
| 51561 | IL23A     | 0.00 | 0.00 | 0.00 | NaN   |
| 51562 | MBIP      | 0.04 | 0.00 | 0.00 | 0.07  |
| 51585 | PCF11     | 0.00 | 0.00 | 0.00 | NaN   |
| 51592 | TRIM33    | 0.04 | 0.00 | 0.05 | 0.34  |
| 51606 | ATP6V1H   | 0.00 | 0.00 | 0.00 | NaN   |
| 51621 | KLF13     | 0.00 | 0.00 | 0.00 | NaN   |
| 51642 | MRPL48    | 0.02 | 0.00 | 0.00 | 0.22  |
| 51650 | MRPS33    | 0.00 | 0.14 | 0.05 | 0.15  |
| 51663 | ZFR       | 0.00 | 0.00 | 0.10 | 0.24  |
| 51666 | ASB4      | 0.00 | 0.00 | 0.00 | NaN   |
| 51678 | MPP6      | 0.00 | 0.00 | 0.05 | 0.05  |
| 51701 | NLK       | 0.10 | 0.00 | 0.05 | 0.02  |
| 51702 | PADI3     | 0.02 | 0.00 | 0.00 | -0.01 |
| 51704 | GPRC5B    | 0.00 | 0.00 | 0.00 | NaN   |
| 51715 | RAB23     | 0.06 | 0.14 | 0.05 | 0.06  |
| 51729 | WBP11     | 0.02 | 0.00 | 0.00 | -0.01 |
| 51733 | UPB1      | 0.00 | 0.14 | 0.05 | 0.01  |
| 51734 | SEPX1     | 0.18 | 0.00 | 0.10 | -0.10 |
| 51741 | WWOX      | 0.00 | 0.00 | 0.00 | NaN   |
| 51744 | CD244     | 0.00 | 0.00 | 0.00 | NaN   |
| 51761 | ATP8A2    | 0.06 | 0.00 | 0.00 | -0.01 |
| 51764 | GNG13     | 0.18 | 0.00 | 0.10 | -0.10 |
| 51768 | TM7SF3    | 0.00 | 0.00 | 0.00 | NaN   |
| 51776 | ZAK       | 0.00 | 0.00 | 0.00 | NaN   |



|       |          |      |      |      |       |
|-------|----------|------|------|------|-------|
| 51778 | MYOZ2    | 0.02 | 0.00 | 0.05 | 0.01  |
| 51807 | TUBA8    | 0.02 | 0.14 | 0.20 | -0.10 |
| 51809 | GALNT7   | 0.00 | 0.00 | 0.00 | NaN   |
| 51816 | CECR1    | 0.02 | 0.14 | 0.20 | 0.21  |
| 53335 | BCL11A   | 0.00 | 0.00 | 0.05 | -0.01 |
| 53339 | BTBD1    | 0.02 | 0.00 | 0.00 | -0.14 |
| 53340 | SPA17    | 0.02 | 0.00 | 0.00 | 0.07  |
| 53343 | NUDT9    | 0.02 | 0.00 | 0.00 | 0.09  |
| 53346 | TM6SF1   | 0.02 | 0.00 | 0.00 | -0.08 |
| 53347 | UBASH3A  | 0.00 | 0.00 | 0.00 | NaN   |
| 53353 | LRP1B    | 0.02 | 0.00 | 0.00 | -0.03 |
| 53358 | SHC3     | 0.00 | 0.00 | 0.00 | NaN   |
| 53371 | NUP54    | 0.00 | 0.00 | 0.00 | NaN   |
| 53405 | CLIC5    | 0.04 | 0.14 | 0.20 | -0.15 |
| 53407 | STX18    | 0.00 | 0.00 | 0.00 | NaN   |
| 53615 | MBD3     | 0.02 | 0.00 | 0.05 | 0.13  |
| 53616 | ADAM22   | 0.00 | 0.00 | 0.00 | NaN   |
| 53635 | PTOV1    | 0.02 | 0.00 | 0.05 | 0.17  |
| 53820 | DSCR6    | 0.00 | 0.00 | 0.00 | NaN   |
| 53822 | FXVD7    | 0.00 | 0.00 | 0.00 | NaN   |
| 53826 | FXVD6    | 0.00 | 0.00 | 0.00 | NaN   |
| 53827 | FXVD5    | 0.00 | 0.00 | 0.00 | NaN   |
| 53832 | IL20RA   | 0.00 | 0.00 | 0.10 | -0.11 |
| 53836 | GPR87    | 0.00 | 0.00 | 0.00 | NaN   |
| 53838 | C11orf24 | 0.04 | 0.00 | 0.05 | 0.06  |
| 53840 | TRIM34   | 0.02 | 0.00 | 0.00 | -0.10 |
| 53904 | MYO3A    | 0.02 | 0.00 | 0.00 | -0.08 |
| 53905 | DUOX1    | 0.02 | 0.00 | 0.05 | 0.11  |
| 53916 | RAB4B    | 0.00 | 0.00 | 0.05 | 0.03  |
| 53918 | PELO     | 0.18 | 0.00 | 0.30 | -0.12 |
| 53942 | CNTN5    | 0.04 | 0.00 | 0.00 | 0.32  |
| 53944 | CSNK1G1  | 0.02 | 0.00 | 0.00 | -0.26 |
| 53947 | A4GALT   | 0.00 | 0.14 | 0.05 | -0.01 |
| 54020 | SLC37A1  | 0.00 | 0.00 | 0.00 | NaN   |
| 54039 | PCBP3    | 0.00 | 0.00 | 0.05 | 0.18  |
| 54069 | C21orf45 | 0.02 | 0.00 | 0.00 | 0.06  |
| 54107 | POLE3    | 0.00 | 0.00 | 0.00 | NaN   |
| 54112 | GPR88    | 0.02 | 0.00 | 0.00 | -0.04 |
| 54148 | MRPL39   | 0.02 | 0.00 | 0.05 | 0.15  |
| 54149 | C21orf91 | 0.00 | 0.00 | 0.00 | NaN   |
| 54207 | KCNK10   | 0.00 | 0.00 | 0.00 | NaN   |
| 54209 | TREM2    | 0.06 | 0.00 | 0.05 | -0.22 |
| 54210 | TREM1    | 0.06 | 0.00 | 0.05 | 0.10  |
| 54212 | SNTG1    | 0.02 | 0.00 | 0.00 | -0.16 |
| 54221 | SNTG2    | 0.20 | 0.14 | 0.35 | -0.11 |
| 54329 | GPR85    | 0.00 | 0.00 | 0.00 | NaN   |
| 54332 | GDAP1    | 0.06 | 0.00 | 0.00 | 0.13  |

|       |          |      |      |      |       |
|-------|----------|------|------|------|-------|
| 54344 | DPM3     | 0.04 | 0.00 | 0.15 | 0.23  |
| 54345 | SOX18    | 0.08 | 0.00 | 0.05 | -0.20 |
| 54361 | WNT4     | 0.00 | 0.00 | 0.05 | 0.23  |
| 54363 | HAO1     | 0.00 | 0.00 | 0.00 | NaN   |
| 54407 | SLC38A2  | 0.04 | 0.00 | 0.05 | 0.12  |
| 54434 | SSH1     | 0.02 | 0.00 | 0.00 | -0.11 |
| 54453 | RIN2     | 0.02 | 0.00 | 0.00 | 0.04  |
| 54462 | KIAA1128 | 0.06 | 0.14 | 0.05 | 0.32  |
| 54472 | TOLLIP   | 0.02 | 0.00 | 0.05 | 0.00  |
| 54474 | KRT20    | 0.02 | 0.86 | 0.05 | 0.14  |
| 54487 | DGCR8    | 0.06 | 0.14 | 0.15 | 0.18  |
| 54490 | UGT2B28  | 0.00 | 0.14 | 0.00 | 0.01  |
| 54504 | CPVL     | 0.00 | 0.00 | 0.00 | NaN   |
| 54540 | FLJ10404 | 0.00 | 0.29 | 0.00 | 0.06  |
| 54551 | MAGEL2   | 0.14 | 0.14 | 0.25 | -0.03 |
| 54554 | WDR5B    | 0.00 | 0.00 | 0.10 | 0.03  |
| 54556 | ING3     | 0.00 | 0.00 | 0.15 | 0.17  |
| 54558 | SPATA6   | 0.02 | 0.00 | 0.05 | -0.06 |
| 54576 | UGT1A8   | 0.00 | 0.00 | 0.00 | NaN   |
| 54578 | UGT1A6   | 0.00 | 0.00 | 0.00 | NaN   |
| 54581 | SCAND2   | 0.00 | 0.00 | 0.00 | NaN   |
| 54583 | EGLN1    | 0.00 | 0.00 | 0.05 | 0.24  |
| 54585 | LZTFL1   | 0.02 | 0.14 | 0.15 | -0.09 |
| 54600 | UGT1A9   | 0.00 | 0.00 | 0.00 | NaN   |
| 54621 | FLJ20674 | 0.02 | 0.00 | 0.10 | 0.05  |
| 54626 | HES2     | 0.02 | 0.00 | 0.00 | 0.11  |
| 54657 | UGT1A4   | 0.00 | 0.00 | 0.00 | NaN   |
| 54658 | UGT1A1   | 0.00 | 0.00 | 0.00 | NaN   |
| 54659 | UGT1A3   | 0.00 | 0.00 | 0.00 | NaN   |
| 54674 | LRRN3    | 0.02 | 0.00 | 0.10 | -0.02 |
| 54676 | GTPBP2   | 0.00 | 0.00 | 0.00 | NaN   |
| 54677 | CROT     | 0.00 | 0.00 | 0.00 | NaN   |
| 54714 | CNGB3    | 0.06 | 0.00 | 0.15 | 0.02  |
| 54715 | A2BP1    | 0.04 | 0.00 | 0.00 | -0.10 |
| 54718 | BTN2A3   | 0.00 | 0.14 | 0.00 | 0.18  |
| 54766 | BTG4     | 0.02 | 0.00 | 0.05 | -0.07 |
| 54788 | DNAJB12  | 0.04 | 0.00 | 0.05 | 0.24  |
| 54795 | TRPM4    | 0.06 | 0.00 | 0.05 | 0.36  |
| 54805 | CNNM2    | 0.02 | 0.00 | 0.00 | -0.02 |
| 54810 | GIPC2    | 0.06 | 0.00 | 0.00 | -0.05 |
| 54829 | ASPN     | 0.04 | 0.00 | 0.05 | -0.21 |
| 54834 | GDAP2    | 0.12 | 0.00 | 0.05 | -0.14 |
| 54840 | APTX     | 0.00 | 0.00 | 0.15 | 0.24  |
| 54848 | FLJ20184 | 0.08 | 0.00 | 0.00 | -0.05 |
| 54860 | MS4A12   | 0.00 | 0.00 | 0.05 | -0.07 |
| 54866 | PPP1R14D | 0.00 | 0.00 | 0.00 | NaN   |
| 54873 | PALMD    | 0.02 | 0.00 | 0.00 | -0.19 |

|       |          |      |      |      |       |
|-------|----------|------|------|------|-------|
| 54878 | DPP8     | 0.00 | 0.00 | 0.10 | 0.02  |
| 54879 | ST7L     | 0.02 | 0.00 | 0.05 | 0.23  |
| 54898 | ELOVL2   | 0.04 | 0.00 | 0.00 | -0.09 |
| 54904 | WHSC1L1  | 0.08 | 0.00 | 0.00 | 0.77  |
| 54910 | SEMA4C   | 0.00 | 0.00 | 0.10 | -0.01 |
| 54948 | MRPL16   | 0.00 | 0.00 | 0.00 | NaN   |
| 54953 | C1orf27  | 0.00 | 0.00 | 0.05 | -0.04 |
| 54971 | BANP     | 0.00 | 0.00 | 0.10 | 0.02  |
| 54976 | C20orf27 | 0.02 | 0.00 | 0.00 | 0.01  |
| 54979 | HRASLS2  | 0.02 | 0.00 | 0.00 | -0.03 |
| 54982 | CLN6     | 0.00 | 0.00 | 0.15 | 0.23  |
| 54994 | C20orf11 | 0.08 | 0.00 | 0.05 | 0.00  |
| 55023 | PHIP     | 0.10 | 0.00 | 0.20 | 0.05  |
| 55038 | CDCA4    | 0.02 | 0.00 | 0.10 | 0.03  |
| 55040 | EPN3     | 0.10 | 0.00 | 0.10 | 0.20  |
| 55056 | FLJ10038 | 0.00 | 0.00 | 0.00 | NaN   |
| 55074 | OXR1     | 0.12 | 0.00 | 0.25 | 0.30  |
| 55089 | SLC38A4  | 0.04 | 0.00 | 0.05 | 0.26  |
| 55096 | FLJ10213 | 0.16 | 0.14 | 0.30 | -0.30 |
| 55118 | CRTAC1   | 0.00 | 0.14 | 0.00 | -0.05 |
| 55124 | PIWIL2   | 0.00 | 0.00 | 0.05 | 0.01  |
| 55146 | ZDHHC4   | 0.02 | 0.00 | 0.00 | 0.17  |
| 55168 | MRPS18A  | 0.00 | 0.00 | 0.00 | NaN   |
| 55173 | MRPS10   | 0.06 | 0.00 | 0.05 | 0.23  |
| 55184 | C20orf12 | 0.02 | 0.00 | 0.00 | 0.11  |
| 55243 | KIRREL   | 0.04 | 0.14 | 0.05 | -0.08 |
| 55257 | C20orf20 | 0.08 | 0.00 | 0.05 | 0.11  |
| 55283 | MCOLN3   | 0.04 | 0.00 | 0.05 | 0.06  |
| 55290 | BRF2     | 0.12 | 0.14 | 0.05 | 0.47  |
| 55294 | FBXW7    | 0.02 | 0.14 | 0.00 | -0.15 |
| 55317 | C20orf29 | 0.02 | 0.00 | 0.00 | 0.19  |
| 55321 | C20orf46 | 0.00 | 0.00 | 0.00 | NaN   |
| 55336 | FBXL8    | 0.02 | 0.00 | 0.00 | 0.08  |
| 55350 | VNN3     | 0.02 | 0.00 | 0.00 | 0.00  |
| 55357 | TBC1D2   | 0.04 | 0.00 | 0.00 | 0.08  |
| 55364 | IMPACT   | 0.00 | 0.00 | 0.10 | 0.08  |
| 55367 | LRDD     | 0.02 | 0.00 | 0.05 | 0.01  |
| 55384 | MEG3     | 0.02 | 0.00 | 0.00 | -0.05 |
| 55388 | MCM10    | 0.00 | 0.14 | 0.00 | -0.06 |
| 55423 | SIRPB2   | 0.00 | 0.00 | 0.00 | NaN   |
| 55466 | DNAJA4   | 0.00 | 0.00 | 0.05 | 0.17  |
| 55486 | PARL     | 0.00 | 0.00 | 0.10 | -0.01 |
| 55506 | H2AFY2   | 0.02 | 0.00 | 0.00 | 0.20  |
| 55507 | GPRC5D   | 0.04 | 0.00 | 0.00 | 0.08  |
| 55520 | ELAC1    | 0.00 | 0.00 | 0.05 | 0.15  |
| 55521 | TRIM36   | 0.02 | 0.00 | 0.00 | 0.21  |
| 55554 | KLK15    | 0.00 | 0.00 | 0.00 | NaN   |

|       |          |      |      |      |       |
|-------|----------|------|------|------|-------|
| 55576 | STAB2    | 0.00 | 0.00 | 0.00 | NaN   |
| 55577 | NAGK     | 0.00 | 0.00 | 0.05 | 0.15  |
| 55584 | CHRNA9   | 0.04 | 0.00 | 0.10 | -0.07 |
| 55607 | PPP1R9A  | 0.02 | 0.00 | 0.00 | -0.18 |
| 55625 | ZDHHC7   | 0.00 | 0.00 | 0.00 | NaN   |
| 55630 | SLC39A4  | 0.10 | 0.00 | 0.15 | 0.28  |
| 55643 | BTBD2    | 0.02 | 0.00 | 0.05 | 0.06  |
| 55644 | OSGEP    | 0.02 | 0.00 | 0.00 | 0.09  |
| 55647 | RAB20    | 0.00 | 0.00 | 0.05 | -0.12 |
| 55653 | BCAS4    | 0.10 | 0.00 | 0.00 | 0.16  |
| 55661 | DDX27    | 0.06 | 0.00 | 0.00 | 0.56  |
| 55662 | HIF1AN   | 0.00 | 0.00 | 0.05 | -0.02 |
| 55665 | URG4     | 0.00 | 0.00 | 0.00 | NaN   |
| 55669 | MFN1     | 0.00 | 0.00 | 0.00 | NaN   |
| 55692 | LUC7L    | 0.18 | 0.00 | 0.10 | -0.14 |
| 55701 | FLJ10357 | 0.02 | 0.00 | 0.00 | 0.13  |
| 55713 | ZNF334   | 0.02 | 0.00 | 0.00 | 0.02  |
| 55715 | DOK4     | 0.02 | 0.00 | 0.00 | 0.12  |
| 55734 | ZFP64    | 0.08 | 0.00 | 0.05 | 0.38  |
| 55737 | VPS35    | 0.43 | 0.29 | 0.15 | -0.46 |
| 55742 | PARVA    | 0.04 | 0.00 | 0.00 | 0.13  |
| 55743 | CHFR     | 0.08 | 0.14 | 0.05 | 0.09  |
| 55746 | NUP133   | 0.00 | 0.00 | 0.05 | 0.05  |
| 55757 | UGCGL2   | 0.04 | 0.00 | 0.00 | 0.02  |
| 55759 | WDR12    | 0.00 | 0.00 | 0.00 | NaN   |
| 55766 | H2AFJ    | 0.02 | 0.00 | 0.00 | 0.01  |
| 55769 | ZNF83    | 0.02 | 0.00 | 0.05 | 0.01  |
| 55775 | TDP1     | 0.00 | 0.00 | 0.00 | NaN   |
| 55794 | DDX28    | 0.02 | 0.00 | 0.00 | 0.08  |
| 55799 | CACNA2D3 | 0.02 | 0.00 | 0.00 | -0.02 |
| 55801 | IL26     | 0.08 | 0.14 | 0.05 | -0.12 |
| 55806 | HR       | 0.00 | 0.00 | 0.05 | 0.00  |
| 55821 | ALLC     | 0.20 | 0.14 | 0.35 | -0.19 |
| 55823 | VPS11    | 0.00 | 0.00 | 0.05 | -0.09 |
| 55835 | CENPJ    | 0.06 | 0.00 | 0.00 | -0.09 |
| 55867 | SLC22A11 | 0.02 | 0.00 | 0.00 | -0.07 |
| 55890 | GPRC5C   | 0.04 | 0.00 | 0.00 | -0.05 |
| 55891 | LENEP    | 0.04 | 0.00 | 0.15 | -0.14 |
| 55892 | MYNN     | 0.00 | 0.00 | 0.05 | 0.04  |
| 55900 | ZNF302   | 0.00 | 0.00 | 0.00 | NaN   |
| 55907 | CMAS     | 0.02 | 0.00 | 0.05 | -0.08 |
| 55908 | LOC55908 | 0.02 | 0.00 | 0.00 | -0.03 |
| 55909 | BIN3     | 0.00 | 0.00 | 0.05 | -0.07 |
| 55911 | APOB48R  | 0.06 | 0.14 | 0.00 | 0.08  |
| 55914 | ERBB2IP  | 0.00 | 0.00 | 0.00 | NaN   |
| 55915 | LANCL2   | 0.04 | 0.14 | 0.20 | 0.07  |
| 55930 | MYO5C    | 0.00 | 0.00 | 0.00 | NaN   |

|       |          |      |      |      |       |
|-------|----------|------|------|------|-------|
| 55968 | NSFL1C   | 0.00 | 0.00 | 0.00 | NaN   |
| 55969 | C20orf24 | 0.04 | 0.00 | 0.00 | 0.23  |
| 56005 | IL27     | 0.06 | 0.14 | 0.00 | 0.07  |
| 56033 | BARX1    | 0.04 | 0.00 | 0.05 | -0.03 |
| 56034 | PDGFC    | 0.00 | 0.14 | 0.00 | -0.04 |
| 56100 | PCDHGB6  | 0.00 | 0.00 | 0.00 | NaN   |
| 56101 | PCDHGB5  | 0.00 | 0.00 | 0.00 | NaN   |
| 56105 | PCDHGA11 | 0.00 | 0.00 | 0.00 | NaN   |
| 56106 | PCDHGA10 | 0.00 | 0.00 | 0.00 | NaN   |
| 56107 | PCDHGA9  | 0.00 | 0.00 | 0.00 | NaN   |
| 56112 | PCDHGA3  | 0.00 | 0.00 | 0.00 | NaN   |
| 56114 | PCDHGA1  | 0.00 | 0.00 | 0.00 | NaN   |
| 56123 | PCDHB13  | 0.00 | 0.00 | 0.00 | NaN   |
| 56124 | PCDHB12  | 0.00 | 0.00 | 0.00 | NaN   |
| 56125 | PCDHB11  | 0.00 | 0.00 | 0.00 | NaN   |
| 56128 | PCDHB8   | 0.00 | 0.00 | 0.00 | NaN   |
| 56130 | PCDHB6   | 0.00 | 0.00 | 0.00 | NaN   |
| 56132 | PCDHB3   | 0.00 | 0.00 | 0.00 | NaN   |
| 56137 | PCDHA12  | 0.00 | 0.00 | 0.00 | NaN   |
| 56139 | PCDHA10  | 0.00 | 0.00 | 0.00 | NaN   |
| 56142 | PCDHA6   | 0.00 | 0.00 | 0.00 | NaN   |
| 56143 | PCDHA5   | 0.00 | 0.00 | 0.00 | NaN   |
| 56145 | PCDHA3   | 0.00 | 0.00 | 0.00 | NaN   |
| 56146 | PCDHA2   | 0.00 | 0.00 | 0.00 | NaN   |
| 56154 | TEX15    | 0.04 | 0.00 | 0.00 | -0.05 |
| 56155 | TEX14    | 0.04 | 0.00 | 0.05 | 0.26  |
| 56158 | TEX12    | 0.02 | 0.00 | 0.00 | 0.16  |
| 56163 | RNF17    | 0.06 | 0.00 | 0.00 | 0.14  |
| 56165 | TDRD1    | 0.04 | 0.14 | 0.05 | -0.11 |
| 56171 | DNAH7    | 0.00 | 0.00 | 0.05 | -0.09 |
| 56172 | ANKH     | 0.00 | 0.00 | 0.05 | 0.01  |
| 56242 | ZNF253   | 0.12 | 0.00 | 0.15 | -0.01 |
| 56244 | BTNL2    | 0.02 | 0.00 | 0.05 | -0.02 |
| 56245 | C21orf62 | 0.00 | 0.00 | 0.00 | NaN   |
| 56253 | CRTAM    | 0.00 | 0.00 | 0.00 | NaN   |
| 56288 | PARD3    | 0.04 | 0.29 | 0.25 | 0.19  |
| 56302 | TRPV5    | 0.00 | 0.14 | 0.05 | 0.13  |
| 56340 | PPP4R2   | 0.16 | 0.14 | 0.30 | 0.04  |
| 56344 | CABP5    | 0.00 | 0.00 | 0.00 | NaN   |
| 56547 | MMP26    | 0.00 | 0.00 | 0.05 | 0.00  |
| 56604 | TUBB4Q   | 0.02 | 0.00 | 0.05 | -0.05 |
| 56606 | SLC2A9   | 0.02 | 0.00 | 0.00 | -0.01 |
| 56617 | SERF1B   | 0.06 | 0.00 | 0.00 | 0.15  |
| 56647 | BCCIP    | 0.02 | 0.00 | 0.00 | -0.05 |
| 56648 | EIF5A2   | 0.02 | 0.00 | 0.00 | -0.05 |
| 56652 | C10orf2  | 0.00 | 0.00 | 0.00 | NaN   |
| 56656 | OR2S2    | 0.02 | 0.00 | 0.00 | 0.06  |

|       |          |      |      |      |       |
|-------|----------|------|------|------|-------|
| 56659 | KCNK13   | 0.00 | 0.00 | 0.00 | NaN   |
| 56660 | KCNK12   | 0.00 | 0.00 | 0.00 | NaN   |
| 56672 | C11orf17 | 0.00 | 0.00 | 0.00 | NaN   |
| 56673 | C11orf16 | 0.00 | 0.00 | 0.00 | NaN   |
| 56676 | ASCL3    | 0.00 | 0.00 | 0.00 | NaN   |
| 56683 | C21orf59 | 0.00 | 0.00 | 0.00 | NaN   |
| 56731 | SLC2A4RG | 0.08 | 0.00 | 0.05 | 0.16  |
| 56848 | SPHK2    | 0.06 | 0.00 | 0.05 | -0.03 |
| 56886 | UGCGL1   | 0.00 | 0.00 | 0.10 | 0.17  |
| 56890 | MDM1     | 0.08 | 0.14 | 0.05 | 0.49  |
| 56892 | C8orf4   | 0.14 | 0.00 | 0.10 | -0.01 |
| 56894 | AGPAT3   | 0.02 | 0.00 | 0.00 | 0.06  |
| 56903 | PAPOLB   | 0.00 | 0.00 | 0.00 | NaN   |
| 56904 | SH3GLB2  | 0.00 | 0.00 | 0.00 | NaN   |
| 56910 | STARD7   | 0.04 | 0.00 | 0.05 | -0.19 |
| 56911 | C21orf7  | 0.02 | 0.00 | 0.00 | -0.02 |
| 56913 | C1GALT1  | 0.00 | 0.00 | 0.00 | NaN   |
| 56914 | OTOR     | 0.00 | 0.00 | 0.10 | 0.05  |
| 56922 | MCCC1    | 0.00 | 0.00 | 0.10 | 0.33  |
| 56924 | PAK6     | 0.00 | 0.00 | 0.00 | NaN   |
| 56925 | LXN      | 0.02 | 0.00 | 0.10 | 0.12  |
| 56929 | FEM1A    | 0.02 | 0.00 | 0.15 | -0.12 |
| 56938 | ARNTL2   | 0.00 | 0.00 | 0.00 | NaN   |
| 56945 | MRPS22   | 0.00 | 0.00 | 0.05 | 0.27  |
| 56953 | NT5M     | 0.02 | 0.00 | 0.00 | 0.13  |
| 56954 | NIT2     | 0.00 | 0.00 | 0.15 | -0.05 |
| 56955 | MEPE     | 0.02 | 0.00 | 0.00 | -0.07 |
| 56978 | PRDM8    | 0.02 | 0.00 | 0.00 | -0.10 |
| 56979 | PRDM9    | 0.02 | 0.14 | 0.05 | -0.06 |
| 56980 | PRDM10   | 0.02 | 0.00 | 0.00 | 0.02  |
| 56981 | PRDM11   | 0.04 | 0.00 | 0.05 | -0.07 |
| 56993 | TOMM22   | 0.00 | 0.14 | 0.00 | -0.12 |
| 56994 | CHPT1    | 0.00 | 0.00 | 0.00 | NaN   |
| 56997 | CABC1    | 0.00 | 0.00 | 0.05 | 0.04  |
| 56998 | CTNNBIP1 | 0.00 | 0.00 | 0.00 | NaN   |
| 56999 | ADAMTS9  | 0.04 | 0.00 | 0.00 | -0.11 |
| 57016 | AKR1B10  | 0.00 | 0.00 | 0.05 | -0.06 |
| 57030 | SLC17A7  | 0.02 | 0.00 | 0.05 | -0.03 |
| 57047 | PLSCR2   | 0.04 | 0.00 | 0.00 | -0.08 |
| 57048 | PLSCR3   | 0.02 | 0.00 | 0.00 | -0.09 |
| 57053 | CHRNA10  | 0.00 | 0.00 | 0.05 | 0.16  |
| 57060 | PCBP4    | 0.00 | 0.00 | 0.10 | -0.02 |
| 57062 | DDX24    | 0.00 | 0.00 | 0.00 | NaN   |
| 57084 | SLC17A6  | 0.02 | 0.00 | 0.00 | 0.00  |
| 57088 | PLSCR4   | 0.04 | 0.00 | 0.00 | 0.18  |
| 57096 | RPGRIP1  | 0.02 | 0.00 | 0.00 | -0.07 |
| 57102 | C12orf4  | 0.02 | 0.00 | 0.00 | -0.11 |

|       |           |      |      |      |       |
|-------|-----------|------|------|------|-------|
| 57103 | C12orf5   | 0.02 | 0.00 | 0.00 | -0.08 |
| 57110 | HRASLS    | 0.02 | 0.00 | 0.00 | 0.04  |
| 57111 | RAB25     | 0.04 | 0.14 | 0.05 | -0.17 |
| 57119 | SPINLW1   | 0.04 | 0.00 | 0.05 | 0.25  |
| 57122 | NUP107    | 0.08 | 0.00 | 0.00 | 0.56  |
| 57127 | RHBG      | 0.04 | 0.14 | 0.05 | 0.14  |
| 57139 | RGL3      | 0.02 | 0.00 | 0.00 | -0.09 |
| 57140 | RNPEPL1   | 0.08 | 0.43 | 0.10 | 0.04  |
| 57142 | RTN4      | 0.02 | 0.00 | 0.05 | 0.03  |
| 57144 | PAK7      | 0.00 | 0.00 | 0.05 | 0.57  |
| 57148 | KIAA1219  | 0.02 | 0.00 | 0.00 | 0.22  |
| 57154 | SMURF1    | 0.02 | 0.00 | 0.00 | 0.11  |
| 57158 | JPH2      | 0.02 | 0.00 | 0.10 | 0.11  |
| 57161 | PELI2     | 0.04 | 0.00 | 0.10 | -0.12 |
| 57162 | PELI1     | 0.00 | 0.00 | 0.00 | NaN   |
| 57172 | CAMK1G    | 0.02 | 0.00 | 0.00 | 0.05  |
| 57192 | MCOLN1    | 0.02 | 0.00 | 0.15 | -0.09 |
| 57198 | ATP8B2    | 0.04 | 0.00 | 0.15 | -0.22 |
| 57205 | ATP10D    | 0.00 | 0.29 | 0.10 | 0.07  |
| 57213 | C13orf1   | 0.04 | 0.00 | 0.00 | 0.38  |
| 57214 | KIAA1199  | 0.02 | 0.00 | 0.00 | -0.04 |
| 57231 | SNX14     | 0.00 | 0.00 | 0.05 | -0.03 |
| 57282 | SLC4A10   | 0.02 | 0.00 | 0.00 | -0.09 |
| 57332 | CBX8      | 0.00 | 0.14 | 0.00 | -0.03 |
| 57336 | ZNF287    | 0.04 | 0.00 | 0.05 | -0.06 |
| 57337 | SENP7     | 0.00 | 0.00 | 0.00 | NaN   |
| 57338 | JPH3      | 0.00 | 0.00 | 0.10 | 0.00  |
| 57343 | ZNF304    | 0.00 | 0.00 | 0.00 | NaN   |
| 57348 | TTYH1     | 0.02 | 0.00 | 0.05 | -0.05 |
| 57379 | AICDA     | 0.02 | 0.00 | 0.15 | -0.14 |
| 57403 | RAB22A    | 0.08 | 0.00 | 0.00 | 0.60  |
| 57418 | WDR18     | 0.02 | 0.00 | 0.05 | 0.10  |
| 57419 | SLC24A3   | 0.04 | 0.00 | 0.05 | 0.11  |
| 57446 | NDRG3     | 0.04 | 0.00 | 0.00 | -0.01 |
| 57447 | NDRG2     | 0.02 | 0.00 | 0.00 | -0.04 |
| 57468 | SLC12A5   | 0.02 | 0.00 | 0.00 | 0.50  |
| 57498 | KIDINS220 | 0.00 | 0.00 | 0.00 | NaN   |
| 57513 | CASKIN2   | 0.02 | 0.14 | 0.00 | 0.49  |
| 57523 | KIAA1305  | 0.02 | 0.00 | 0.05 | -0.03 |
| 57535 | KIAA1324  | 0.06 | 0.00 | 0.20 | -0.02 |
| 57556 | SEMA6A    | 0.02 | 0.00 | 0.00 | -0.03 |
| 57586 | SYT13     | 0.04 | 0.00 | 0.05 | 0.00  |
| 57591 | MKL1      | 0.00 | 0.14 | 0.00 | -0.18 |
| 57613 | KIAA1467  | 0.04 | 0.00 | 0.00 | 0.07  |
| 57634 | EP400     | 0.08 | 0.14 | 0.05 | -0.07 |
| 57663 | USP29     | 0.00 | 0.00 | 0.05 | -0.01 |
| 57664 | PLEKHA4   | 0.06 | 0.00 | 0.05 | 0.14  |

|       |          |      |      |      |       |
|-------|----------|------|------|------|-------|
| 57698 | KIAA1598 | 0.04 | 0.14 | 0.05 | -0.13 |
| 57707 | KIAA1609 | 0.00 | 0.00 | 0.00 | NaN   |
| 57710 | KIAA1614 | 0.04 | 0.00 | 0.10 | 0.05  |
| 57712 | TRPM3    | 0.02 | 0.00 | 0.00 | 0.22  |
| 57715 | SEMA4G   | 0.00 | 0.00 | 0.00 | NaN   |
| 57716 | PRX      | 0.00 | 0.00 | 0.05 | 0.14  |
| 57720 | GPR107   | 0.04 | 0.00 | 0.00 | -0.06 |
| 57731 | SPTBN4   | 0.00 | 0.00 | 0.05 | 0.66  |
| 57763 | ANKRA2   | 0.06 | 0.00 | 0.00 | 0.04  |
| 57786 | RBAK     | 0.00 | 0.00 | 0.00 | NaN   |
| 57799 | RAB40C   | 0.18 | 0.00 | 0.10 | -0.13 |
| 57804 | POLD4    | 0.04 | 0.00 | 0.00 | 0.56  |
| 57817 | HAMP     | 0.00 | 0.00 | 0.00 | NaN   |
| 57834 | CYP4F11  | 0.04 | 0.00 | 0.00 | 0.00  |
| 57835 | SLC4A5   | 0.00 | 0.00 | 0.05 | 0.03  |
| 58155 | PTBP2    | 0.02 | 0.00 | 0.00 | -0.13 |
| 58157 | NGB      | 0.00 | 0.00 | 0.00 | NaN   |
| 58158 | NEUROD4  | 0.02 | 0.00 | 0.05 | -0.05 |
| 58189 | WFDC1    | 0.00 | 0.00 | 0.00 | NaN   |
| 58472 | SQRDL    | 0.02 | 0.00 | 0.05 | 0.11  |
| 58488 | PCTP     | 0.04 | 0.00 | 0.05 | 0.16  |
| 58494 | JAM2     | 0.02 | 0.00 | 0.05 | 0.01  |
| 58503 | PROL1    | 0.00 | 0.14 | 0.00 | 0.09  |
| 58529 | MYOZ1    | 0.00 | 0.00 | 0.00 | NaN   |
| 58533 | SNX6     | 0.04 | 0.00 | 0.00 | -0.03 |
| 58986 | TMEM8    | 0.18 | 0.00 | 0.10 | 0.02  |
| 59067 | IL21     | 0.00 | 0.14 | 0.05 | -0.17 |
| 59269 | HIVEP3   | 0.02 | 0.00 | 0.05 | 0.15  |
| 59286 | UBL5     | 0.02 | 0.00 | 0.15 | 0.17  |
| 59307 | SIGIRR   | 0.06 | 0.29 | 0.10 | 0.01  |
| 59335 | PRDM12   | 0.04 | 0.00 | 0.00 | -0.05 |
| 59336 | PRDM13   | 0.02 | 0.00 | 0.05 | -0.02 |
| 59338 | PLEKHA1  | 0.04 | 0.00 | 0.00 | -0.08 |
| 59340 | HRH4     | 0.00 | 0.00 | 0.10 | -0.09 |
| 59341 | TRPV4    | 0.02 | 0.00 | 0.00 | -0.11 |
| 59343 | SENP2    | 0.02 | 0.14 | 0.00 | -0.10 |
| 59344 | ALOXE3   | 0.00 | 0.00 | 0.00 | NaN   |
| 59347 | FKSG2    | 0.12 | 0.14 | 0.05 | -0.07 |
| 60314 | C12orf10 | 0.00 | 0.00 | 0.00 | NaN   |
| 60385 | TSKS     | 0.02 | 0.00 | 0.05 | 0.03  |
| 60436 | TGIF2    | 0.04 | 0.00 | 0.00 | 0.41  |
| 60467 | BPESC1   | 0.00 | 0.00 | 0.00 | NaN   |
| 60468 | BACH2    | 0.00 | 0.00 | 0.05 | -0.01 |
| 60482 | SLC5A7   | 0.02 | 0.00 | 0.00 | 0.05  |
| 60488 | MRPS35   | 0.00 | 0.00 | 0.00 | NaN   |
| 60491 | NIF3L1   | 0.00 | 0.00 | 0.05 | -0.03 |
| 60496 | AASDHPPT | 0.04 | 0.00 | 0.00 | 0.05  |



|       |         |      |      |      |       |
|-------|---------|------|------|------|-------|
| 60528 | ELAC2   | 0.04 | 0.00 | 0.00 | -0.04 |
| 60529 | ALX4    | 0.00 | 0.00 | 0.05 | 0.02  |
| 60598 | KCNK15  | 0.02 | 0.00 | 0.00 | 0.65  |
| 60681 | FKBP10  | 0.02 | 0.86 | 0.05 | 0.23  |
| 60682 | SMAP1   | 0.12 | 0.00 | 0.05 | -0.12 |
| 63826 | SRR     | 0.04 | 0.00 | 0.05 | 0.17  |
| 63827 | BCAN    | 0.04 | 0.14 | 0.05 | 0.04  |
| 63875 | MRPL17  | 0.00 | 0.00 | 0.00 | NaN   |
| 63876 | PKNOX2  | 0.02 | 0.00 | 0.00 | -0.07 |
| 63916 | ELMO2   | 0.02 | 0.00 | 0.10 | 0.04  |
| 63925 | ZNF335  | 0.02 | 0.00 | 0.00 | 0.16  |
| 63926 | ANKRD5  | 0.00 | 0.00 | 0.05 | -0.05 |
| 63931 | MRPS14  | 0.02 | 0.00 | 0.10 | 0.16  |
| 63943 | FKBPL   | 0.02 | 0.00 | 0.05 | 0.50  |
| 63971 | KIF13A  | 0.04 | 0.00 | 0.10 | -0.02 |
| 63974 | NEUROD6 | 0.00 | 0.00 | 0.00 | NaN   |
| 63978 | PRDM14  | 0.04 | 0.14 | 0.00 | 0.08  |
| 64063 | PRSS22  | 0.02 | 0.00 | 0.00 | -0.03 |
| 64064 | OXCT2   | 0.02 | 0.00 | 0.05 | 0.01  |
| 64066 | MMP27   | 0.00 | 0.00 | 0.00 | NaN   |
| 64067 | NPAS3   | 0.02 | 0.00 | 0.05 | -0.02 |
| 64077 | LHPP    | 0.04 | 0.00 | 0.05 | -0.18 |
| 64078 | SLC28A3 | 0.00 | 0.00 | 0.00 | NaN   |
| 64083 | GOLPH3  | 0.00 | 0.00 | 0.10 | 0.29  |
| 64084 | CLSTN2  | 0.02 | 0.00 | 0.00 | 0.19  |
| 64087 | MCCC2   | 0.06 | 0.00 | 0.00 | 0.07  |
| 64089 | SNX16   | 0.06 | 0.00 | 0.15 | 0.11  |
| 64096 | GFRA4   | 0.02 | 0.00 | 0.00 | 0.00  |
| 64100 | ELSPBP1 | 0.00 | 0.00 | 0.00 | NaN   |
| 64110 | MAGEF1  | 0.02 | 0.14 | 0.00 | -0.16 |
| 64122 | FN3K    | 0.00 | 0.00 | 0.00 | NaN   |
| 64132 | XYLT2   | 0.10 | 0.00 | 0.10 | 0.19  |
| 64137 | ABCG4   | 0.00 | 0.00 | 0.05 | 0.02  |
| 64173 | SPATA1  | 0.04 | 0.00 | 0.05 | -0.07 |
| 64211 | LHX5    | 0.02 | 0.00 | 0.00 | 0.18  |
| 64223 | GBL     | 0.18 | 0.00 | 0.10 | -0.04 |
| 64231 | MS4A6A  | 0.00 | 0.00 | 0.00 | NaN   |
| 64232 | MS4A5   | 0.00 | 0.00 | 0.00 | NaN   |
| 64240 | ABCG5   | 0.02 | 0.00 | 0.05 | -0.15 |
| 64284 | RAB17   | 0.00 | 0.00 | 0.00 | NaN   |
| 64320 | RNF25   | 0.04 | 0.00 | 0.00 | 0.14  |
| 64321 | SOX17   | 0.00 | 0.00 | 0.00 | NaN   |
| 64324 | NSD1    | 0.00 | 0.00 | 0.00 | NaN   |
| 64328 | XPO4    | 0.18 | 0.00 | 0.20 | -0.02 |
| 64374 | SIL1    | 0.00 | 0.00 | 0.00 | NaN   |
| 64377 | CHST8   | 0.00 | 0.00 | 0.00 | NaN   |
| 64386 | MMP25   | 0.02 | 0.00 | 0.00 | 0.01  |

|       |           |      |      |      |       |
|-------|-----------|------|------|------|-------|
| 64397 | ZFP106    | 0.04 | 0.00 | 0.00 | -0.03 |
| 64398 | MPP5      | 0.00 | 0.00 | 0.05 | -0.14 |
| 64405 | CDH22     | 0.02 | 0.00 | 0.00 | 0.06  |
| 64411 | ARAP3     | 0.00 | 0.00 | 0.00 | NaN   |
| 64446 | DNAI2     | 0.04 | 0.00 | 0.00 | 0.19  |
| 64499 | TPSB2     | 0.18 | 0.00 | 0.10 | -0.09 |
| 64506 | CPEB1     | 0.02 | 0.00 | 0.00 | 0.02  |
| 64577 | ALDH8A1   | 0.00 | 0.00 | 0.00 | NaN   |
| 64579 | NDST4     | 0.02 | 0.00 | 0.05 | -0.06 |
| 64600 | PLA2G2F   | 0.02 | 0.00 | 0.05 | 0.02  |
| 64699 | TMPRSS3   | 0.00 | 0.00 | 0.00 | NaN   |
| 64708 | COPS7B    | 0.02 | 0.00 | 0.15 | 0.16  |
| 64750 | SMURF2    | 0.12 | 0.00 | 0.20 | 0.31  |
| 64783 | RBM15     | 0.06 | 0.14 | 0.00 | -0.14 |
| 64794 | DDX31     | 0.04 | 0.00 | 0.00 | -0.16 |
| 64816 | CYP3A43   | 0.02 | 0.00 | 0.00 | 0.00  |
| 64834 | ELOVL1    | 0.02 | 0.00 | 0.05 | 0.11  |
| 64849 | SLC13A3   | 0.02 | 0.00 | 0.00 | 0.04  |
| 64850 | AGXT2L1   | 0.08 | 0.00 | 0.00 | -0.09 |
| 64858 | DCLRE1B   | 0.02 | 0.00 | 0.05 | 0.34  |
| 64895 | PAPOLG    | 0.00 | 0.00 | 0.05 | 0.03  |
| 64901 | RANBP17   | 0.02 | 0.00 | 0.00 | 0.08  |
| 64919 | BCL11B    | 0.00 | 0.00 | 0.00 | NaN   |
| 64960 | MRPS15    | 0.04 | 0.00 | 0.05 | 0.00  |
| 64963 | MRPS11    | 0.00 | 0.00 | 0.00 | NaN   |
| 64981 | MRPL34    | 0.04 | 0.00 | 0.00 | 0.46  |
| 65003 | MRPL11    | 0.04 | 0.00 | 0.05 | 0.10  |
| 65005 | MRPL9     | 0.02 | 0.00 | 0.10 | 0.16  |
| 65009 | NDRG4     | 0.04 | 0.00 | 0.05 | -0.02 |
| 65010 | SLC26A6   | 0.00 | 0.00 | 0.05 | 0.39  |
| 65012 | SLC26A10  | 0.02 | 0.14 | 0.00 | 0.26  |
| 65018 | PINK1     | 0.02 | 0.00 | 0.05 | 0.12  |
| 65080 | MRPL44    | 0.00 | 0.00 | 0.00 | NaN   |
| 65082 | VPS33A    | 0.02 | 0.00 | 0.10 | 0.00  |
| 65258 | MPPE1     | 0.04 | 0.00 | 0.10 | 0.08  |
| 65993 | MRPS34    | 0.18 | 0.00 | 0.10 | -0.05 |
| 66002 | CYP4F12   | 0.04 | 0.00 | 0.00 | -0.09 |
| 66035 | SLC2A11   | 0.00 | 0.14 | 0.05 | -0.20 |
| 78988 | MRP63     | 0.18 | 0.00 | 0.20 | -0.02 |
| 79054 | TRPM8     | 0.02 | 0.00 | 0.00 | -0.14 |
| 79058 | ASPSCR1   | 0.00 | 0.00 | 0.00 | NaN   |
| 79083 | MLPH      | 0.00 | 0.00 | 0.00 | NaN   |
| 79092 | CARD14    | 0.00 | 0.14 | 0.00 | 0.11  |
| 79095 | C9orf16   | 0.00 | 0.00 | 0.00 | NaN   |
| 79133 | C20orf7   | 0.00 | 0.14 | 0.00 | -0.02 |
| 79144 | C20orf149 | 0.08 | 0.00 | 0.05 | 0.20  |
| 79147 | FKRP      | 0.00 | 0.00 | 0.05 | -0.10 |

|       |          |      |      |      |       |
|-------|----------|------|------|------|-------|
| 79148 | MMP28    | 0.06 | 0.00 | 0.00 | 0.01  |
| 79187 | FSD1     | 0.02 | 0.00 | 0.15 | 0.05  |
| 79369 | B3GNT4   | 0.02 | 0.00 | 0.10 | -0.09 |
| 79400 | NOX5     | 0.00 | 0.00 | 0.15 | 0.15  |
| 79442 | LRRC2    | 0.02 | 0.14 | 0.15 | -0.06 |
| 79443 | FYCO1    | 0.02 | 0.14 | 0.15 | 0.12  |
| 79444 | BIRC7    | 0.08 | 0.00 | 0.05 | 0.02  |
| 79583 | FLJ22167 | 0.00 | 0.00 | 0.00 | NaN   |
| 79590 | MRPL24   | 0.04 | 0.14 | 0.05 | -0.04 |
| 79640 | FLJ23584 | 0.00 | 0.14 | 0.00 | -0.04 |
| 79661 | NEIL1    | 0.00 | 0.00 | 0.05 | -0.18 |
| 79667 | FLJ13197 | 0.04 | 0.00 | 0.10 | 0.09  |
| 79716 | NPEPL1   | 0.10 | 0.00 | 0.00 | 0.58  |
| 79719 | FLJ11506 | 0.02 | 0.00 | 0.00 | 0.32  |
| 79723 | SUV39H2  | 0.02 | 0.14 | 0.05 | -0.08 |
| 79753 | SNIP1    | 0.04 | 0.00 | 0.05 | 0.02  |
| 79754 | ASB13    | 0.00 | 0.00 | 0.00 | NaN   |
| 79767 | ELMO3    | 0.02 | 0.00 | 0.00 | 0.07  |
| 79783 | C7orf10  | 0.00 | 0.00 | 0.00 | NaN   |
| 79800 | ALS2CR8  | 0.00 | 0.00 | 0.00 | NaN   |
| 79814 | AGMAT    | 0.02 | 0.00 | 0.00 | -0.02 |
| 79833 | GEMIN6   | 0.02 | 0.00 | 0.05 | 0.05  |
| 79857 | FLJ13224 | 0.02 | 0.00 | 0.00 | 0.01  |
| 79858 | NEK11    | 0.02 | 0.00 | 0.00 | 0.14  |
| 79870 | BAALC    | 0.12 | 0.00 | 0.25 | 0.31  |
| 79890 | RIN3     | 0.00 | 0.00 | 0.05 | 0.03  |
| 79899 | FLJ14213 | 0.02 | 0.00 | 0.00 | 0.02  |
| 79953 | C20orf39 | 0.04 | 0.00 | 0.15 | -0.06 |
| 80011 | NIP30    | 0.00 | 0.00 | 0.00 | NaN   |
| 80146 | UXS1     | 0.02 | 0.00 | 0.10 | -0.03 |
| 80157 | FLJ21511 | 0.04 | 0.00 | 0.05 | 0.04  |
| 80196 | RNF34    | 0.02 | 0.00 | 0.10 | 0.18  |
| 80198 | MUS81    | 0.04 | 0.00 | 0.05 | -0.09 |
| 80207 | OPA3     | 0.00 | 0.00 | 0.05 | 0.36  |
| 80271 | ITPKC    | 0.00 | 0.00 | 0.05 | 0.22  |
| 80307 | FER1L4   | 0.06 | 0.14 | 0.05 | 0.32  |
| 80324 | PUS1     | 0.08 | 0.14 | 0.05 | -0.01 |
| 80328 | ULBP2    | 0.02 | 0.00 | 0.05 | -0.03 |
| 80329 | ULBP1    | 0.02 | 0.00 | 0.05 | -0.03 |
| 80351 | TNKS2    | 0.02 | 0.00 | 0.05 | 0.03  |
| 80704 | SLC19A3  | 0.02 | 0.00 | 0.15 | -0.01 |
| 80705 | TSGA10   | 0.02 | 0.00 | 0.10 | -0.07 |
| 80737 | C6orf27  | 0.02 | 0.00 | 0.05 | 0.12  |
| 80738 | C6orf26  | 0.02 | 0.00 | 0.05 | 0.02  |
| 80739 | C6orf25  | 0.02 | 0.00 | 0.05 | -0.19 |
| 80765 | STARD5   | 0.02 | 0.00 | 0.00 | -0.05 |
| 80781 | COL18A1  | 0.00 | 0.00 | 0.05 | -0.20 |

|       |          |      |      |      |       |
|-------|----------|------|------|------|-------|
| 80830 | APOL6    | 0.00 | 0.29 | 0.05 | -0.12 |
| 80831 | APOL5    | 0.00 | 0.29 | 0.05 | -0.13 |
| 80833 | APOL3    | 0.00 | 0.14 | 0.00 | 0.14  |
| 80895 | ILKAP    | 0.08 | 0.43 | 0.10 | -0.15 |
| 80975 | TMPRSS5  | 0.00 | 0.00 | 0.00 | NaN   |
| 81025 | GJA10    | 0.00 | 0.00 | 0.05 | 0.01  |
| 81027 | TUBB1    | 0.12 | 0.00 | 0.00 | -0.08 |
| 81029 | WNT5B    | 0.08 | 0.14 | 0.10 | 0.07  |
| 81031 | SLC2A10  | 0.02 | 0.00 | 0.00 | 0.03  |
| 81035 | COLEC12  | 0.02 | 0.00 | 0.05 | -0.14 |
| 81285 | OR51E2   | 0.00 | 0.00 | 0.05 | -0.06 |
| 81490 | PTDSS2   | 0.06 | 0.29 | 0.10 | 0.05  |
| 81491 | GPR63    | 0.08 | 0.00 | 0.00 | 0.03  |
| 81492 | RSHL1    | 0.00 | 0.00 | 0.05 | -0.09 |
| 81539 | SLC38A1  | 0.04 | 0.00 | 0.05 | 0.05  |
| 81543 | LRRC3    | 0.02 | 0.00 | 0.00 | -0.17 |
| 81551 | STMN4    | 0.02 | 0.00 | 0.00 | 0.08  |
| 81563 | C1orf21  | 0.00 | 0.00 | 0.00 | NaN   |
| 81578 | COL21A1  | 0.06 | 0.14 | 0.05 | -0.09 |
| 81620 | CDT1     | 0.00 | 0.00 | 0.10 | 0.02  |
| 81622 | UNC93B1  | 0.04 | 0.00 | 0.05 | 0.19  |
| 81624 | DIAPH3   | 0.08 | 0.14 | 0.00 | -0.14 |
| 81626 | C1orf14  | 0.02 | 0.00 | 0.00 | 0.00  |
| 81627 | C1orf25  | 0.00 | 0.00 | 0.05 | -0.18 |
| 81691 | LOC81691 | 0.02 | 0.14 | 0.00 | 0.23  |
| 81693 | AMN      | 0.00 | 0.00 | 0.05 | 0.05  |
| 81696 | OR5V1    | 0.04 | 0.14 | 0.05 | -0.05 |
| 81698 | C15orf5  | 0.00 | 0.00 | 0.05 | 0.12  |
| 81792 | ADAMTS12 | 0.00 | 0.00 | 0.10 | -0.12 |
| 81797 | OR12D3   | 0.04 | 0.14 | 0.05 | 0.08  |
| 81831 | NETO2    | 0.43 | 0.29 | 0.15 | -0.12 |
| 81833 | SPACA1   | 0.00 | 0.00 | 0.05 | 0.19  |
| 81854 | MGC3771  | 0.02 | 0.00 | 0.00 | -0.04 |
| 81876 | RAB1B    | 0.04 | 0.00 | 0.05 | 0.23  |
| 83442 | SH3BGRL3 | 0.02 | 0.00 | 0.05 | -0.02 |
| 83452 | RAB33B   | 0.00 | 0.00 | 0.05 | 0.04  |
| 83481 | EPPK1    | 0.10 | 0.00 | 0.15 | 0.18  |
| 83482 | SCRT1    | 0.10 | 0.00 | 0.15 | -0.02 |
| 83483 | PLVAP    | 0.04 | 0.00 | 0.00 | -0.01 |
| 83660 | TLN2     | 0.00 | 0.00 | 0.00 | NaN   |
| 83737 | ITCH     | 0.02 | 0.00 | 0.05 | -0.10 |
| 83988 | NCALD    | 0.12 | 0.00 | 0.25 | 0.18  |
| 83990 | BRIP1    | 0.10 | 0.00 | 0.05 | 0.32  |
| 84084 | RAB6C    | 0.00 | 0.00 | 0.10 | 0.04  |
| 84099 | ID2B     | 0.04 | 0.00 | 0.00 | -0.14 |
| 84107 | ZIC4     | 0.04 | 0.00 | 0.00 | -0.04 |
| 84148 | MYST1    | 0.02 | 0.00 | 0.00 | -0.12 |

|        |          |      |      |      |       |
|--------|----------|------|------|------|-------|
| 84561  | SLC12A8  | 0.00 | 0.00 | 0.10 | 0.12  |
| 84612  | PAR6B    | 0.10 | 0.00 | 0.00 | 0.44  |
| 84658  | EMR3     | 0.00 | 0.00 | 0.05 | -0.22 |
| 84789  | MGC2889  | 0.02 | 0.00 | 0.00 | -0.01 |
| 85352  | KIAA1644 | 0.00 | 0.14 | 0.05 | -0.15 |
| 85359  | DGCR6L   | 0.06 | 0.14 | 0.15 | 0.16  |
| 85363  | TRIM5    | 0.02 | 0.00 | 0.00 | 0.03  |
| 85459  | KIAA1731 | 0.00 | 0.00 | 0.00 | NaN   |
| 85477  | SCIN     | 0.00 | 0.00 | 0.00 | NaN   |
| 86722  | GREB1    | 0.00 | 0.00 | 0.00 | NaN   |
| 89781  | HPS4     | 0.00 | 0.14 | 0.05 | -0.08 |
| 89870  | TRIM15   | 0.04 | 0.14 | 0.05 | 0.21  |
| 89874  | SLC25A21 | 0.04 | 0.00 | 0.00 | -0.02 |
| 89910  | UBE3B    | 0.02 | 0.00 | 0.00 | -0.09 |
| 91754  | NEK9     | 0.00 | 0.00 | 0.00 | NaN   |
| 91949  | COG7     | 0.02 | 0.14 | 0.00 | -0.13 |
| 91977  | MYOZ3    | 0.00 | 0.14 | 0.00 | 0.00  |
| 94009  | SERHL    | 0.00 | 0.14 | 0.05 | 0.12  |
| 94025  | MUC16    | 0.02 | 0.00 | 0.15 | 0.23  |
| 94104  | C21orf66 | 0.00 | 0.00 | 0.00 | NaN   |
| 112399 | EGLN3    | 0.04 | 0.00 | 0.00 | -0.08 |
| 113878 | DTX2     | 0.00 | 0.00 | 0.00 | NaN   |
| 114049 | WBSR22   | 0.00 | 0.00 | 0.00 | NaN   |
| 114088 | TRIM9    | 0.02 | 0.00 | 0.00 | 0.00  |
| 114625 | ERMAP    | 0.02 | 0.00 | 0.05 | 0.44  |
| 114876 | OSBPL1A  | 0.00 | 0.00 | 0.10 | 0.18  |
| 114881 | OSBPL7   | 0.00 | 0.00 | 0.00 | NaN   |
| 114882 | OSBPL8   | 0.02 | 0.00 | 0.00 | -0.06 |
| 114883 | OSBPL9   | 0.02 | 0.00 | 0.00 | 0.11  |
| 114884 | OSBPL10  | 0.06 | 0.00 | 0.05 | 0.17  |
| 114885 | OSBPL11  | 0.00 | 0.00 | 0.10 | 0.23  |
| 114897 | C1QTNF1  | 0.02 | 0.14 | 0.00 | -0.04 |
| 114899 | C1QTNF3  | 0.02 | 0.14 | 0.05 | -0.07 |
| 116039 | OSR2     | 0.06 | 0.14 | 0.05 | -0.03 |
| 116832 | RPL39L   | 0.02 | 0.14 | 0.00 | 0.00  |
| 117246 | FSTJ3    | 0.12 | 0.00 | 0.20 | 0.39  |
| 117247 | SLC16A10 | 0.02 | 0.00 | 0.10 | -0.02 |
| 118433 | RPL23AP7 | 0.00 | 0.00 | 0.10 | 0.16  |
| 140467 | ZNF358   | 0.02 | 0.00 | 0.15 | 0.05  |
| 140545 | RNF32    | 0.00 | 0.00 | 0.05 | -0.05 |
| 140801 | RPL10L   | 0.00 | 0.00 | 0.10 | -0.16 |
| 140803 | TRPM6    | 0.00 | 0.00 | 0.00 | NaN   |
| 171558 | PTCRA    | 0.06 | 0.00 | 0.05 | 0.32  |
| 192683 | SCAMP5   | 0.00 | 0.00 | 0.05 | -0.13 |

## Neve et al. dataset

| Gene_no | Gene_name | Average_CNA_Score_ER | Average_CNA_Score_HER2 | Average_CNA_Score_TN | Overall_Correlation |
|---------|-----------|----------------------|------------------------|----------------------|---------------------|
| 2       | A2M       | -0.09                | 0.00                   | 0.00                 | 0.05                |
| 9       | NAT1      | 0.00                 | -0.13                  | -0.05                | 0.18                |
| 10      | NAT2      | 0.00                 | -0.13                  | -0.05                | 0.02                |
| 12      | SERPINA3  | 0.00                 | 0.00                   | 0.00                 | NaN                 |
| 13      | AADAC     | 0.00                 | 0.13                   | 0.00                 | -0.06               |
| 14      | AAMP      | 0.00                 | 0.00                   | 0.00                 | NaN                 |
| 15      | AANAT     | 0.00                 | 0.13                   | 0.00                 | -0.04               |
| 16      | AARS      | -0.09                | -0.13                  | 0.05                 | 0.53                |
| 18      | ABAT      | 0.00                 | 0.00                   | 0.00                 | NaN                 |
| 19      | ABCA1     | 0.00                 | 0.00                   | 0.00                 | NaN                 |
| 20      | ABCA2     | 0.00                 | 0.00                   | 0.00                 | NaN                 |
| 21      | ABCA3     | 0.00                 | 0.13                   | 0.00                 | 0.03                |
| 23      | ABCF1     | 0.00                 | 0.00                   | 0.00                 | NaN                 |
| 24      | ABCA4     | 0.09                 | 0.13                   | 0.00                 | 0.38                |
| 25      | ABL1      | 0.00                 | 0.00                   | 0.00                 | NaN                 |
| 26      | ABP1      | 0.00                 | 0.00                   | 0.00                 | 0.09                |
| 27      | ABL2      | 0.00                 | 0.00                   | 0.00                 | NaN                 |
| 28      | ABO       | 0.00                 | 0.00                   | 0.00                 | NaN                 |
| 29      | ABR       | 0.00                 | -0.13                  | 0.00                 | -0.11               |
| 30      | ACAA1     | 0.00                 | 0.25                   | 0.00                 | 0.70                |
| 31      | ACACA     | 0.00                 | 0.00                   | 0.00                 | 0.49                |
| 32      | ACACB     | 0.00                 | 0.00                   | 0.00                 | NaN                 |
| 33      | ACADL     | 0.00                 | 0.00                   | 0.00                 | NaN                 |
| 34      | ACADM     | 0.00                 | 0.00                   | 0.00                 | NaN                 |
| 35      | ACADS     | 0.00                 | -0.13                  | 0.00                 | -0.05               |
| 36      | ACADSB    | 0.09                 | 0.00                   | -0.05                | 0.66                |
| 37      | ACADVL    | 0.00                 | 0.00                   | 0.00                 | NaN                 |
| 38      | ACAT1     | 0.00                 | 0.00                   | 0.00                 | NaN                 |
| 39      | ACAT2     | 0.00                 | 0.00                   | 0.05                 | 0.17                |
| 40      | ACCN1     | 0.00                 | 0.00                   | 0.00                 | 0.12                |
| 41      | ACCN2     | 0.00                 | 0.00                   | 0.00                 | NaN                 |
| 43      | ACHE      | 0.18                 | 0.00                   | 0.00                 | 0.13                |
| 47      | ACLY      | 0.00                 | 0.13                   | 0.00                 | 0.32                |
| 48      | ACO1      | -0.09                | 0.00                   | 0.00                 | 0.44                |
| 49      | ACR       | 0.00                 | -0.25                  | -0.05                | -0.29               |
| 50      | ACO2      | 0.00                 | 0.00                   | 0.05                 | 0.29                |
| 51      | ACOX1     | 0.00                 | 0.13                   | 0.05                 | 0.37                |
| 52      | ACP1      | 0.00                 | 0.00                   | 0.00                 | NaN                 |
| 53      | ACP2      | 0.00                 | 0.00                   | 0.00                 | NaN                 |
| 54      | ACP5      | 0.00                 | 0.00                   | 0.00                 | NaN                 |
| 55      | ACPP      | 0.00                 | 0.00                   | 0.00                 | NaN                 |
| 56      | ACRV1     | -0.09                | 0.00                   | -0.10                | -0.06               |
| 58      | ACTA1     | 0.09                 | 0.00                   | 0.00                 | -0.06               |

|     |           |       |       |       |       |
|-----|-----------|-------|-------|-------|-------|
| 59  | ACTA2     | 0.09  | 0.00  | 0.00  | -0.06 |
| 60  | ACTB      | 0.00  | 0.00  | 0.10  | -0.09 |
| 70  | ACTC      | 0.00  | 0.00  | 0.00  | NaN   |
| 71  | ACTG1     | 0.00  | 0.00  | 0.00  | NaN   |
| 72  | ACTG2     | 0.00  | 0.00  | 0.00  | NaN   |
| 81  | ACTN4     | 0.00  | 0.00  | 0.00  | NaN   |
| 86  | BAF53A    | 0.09  | 0.00  | 0.00  | 0.16  |
| 87  | ACTN1     | 0.00  | 0.00  | 0.00  | NaN   |
| 88  | ACTN2     | 0.18  | 0.13  | 0.00  | 0.27  |
| 89  | ACTN3     | 0.00  | 0.00  | 0.05  | -0.01 |
| 90  | ACVR1     | 0.00  | 0.00  | -0.05 | 0.27  |
| 91  | ACVR1B    | 0.00  | 0.00  | 0.00  | NaN   |
| 92  | ACVR2     | 0.00  | 0.00  | 0.00  | NaN   |
| 93  | ACVR2B    | 0.00  | 0.00  | 0.00  | NaN   |
| 94  | ACVRL1    | 0.00  | 0.00  | 0.00  | NaN   |
| 95  | ACY1      | -0.09 | 0.00  | -0.10 | 0.41  |
| 97  | ACYP1     | 0.00  | 0.00  | 0.00  | NaN   |
| 98  | ACYP2     | 0.09  | 0.00  | -0.05 | 0.08  |
| 100 | ADA       | 0.09  | 0.13  | 0.00  | 0.02  |
| 101 | ADAM8     | 0.00  | 0.00  | -0.10 | 0.23  |
| 102 | ADAM10    | 0.09  | 0.00  | 0.05  | 0.37  |
| 103 | ADAR      | 0.09  | 0.25  | 0.00  | 0.39  |
| 104 | ADARB1    | 0.00  | 0.00  | 0.00  | NaN   |
| 107 | ADCY1     | 0.00  | 0.00  | 0.00  | NaN   |
| 108 | ADCY2     | 0.00  | 0.00  | 0.05  | 0.00  |
| 109 | ADCY3     | 0.09  | 0.00  | 0.00  | -0.16 |
| 112 | ADCY6     | 0.00  | 0.00  | 0.00  | NaN   |
| 113 | ADCY7     | -0.09 | 0.00  | -0.05 | 0.19  |
| 114 | ADCY8     | 0.00  | -0.13 | 0.15  | 0.11  |
| 115 | ADCY9     | 0.00  | 0.00  | 0.00  | NaN   |
| 116 | ADCYAP1   | 0.00  | 0.00  | 0.00  | NaN   |
| 117 | ADCYAP1R1 | 0.00  | 0.13  | 0.00  | -0.02 |
| 118 | ADD1      | 0.00  | -0.13 | -0.15 | 0.56  |
| 119 | ADD2      | 0.00  | 0.00  | 0.00  | NaN   |
| 120 | ADD3      | 0.00  | 0.00  | -0.05 | 0.24  |
| 123 | ADFP      | 0.00  | -0.25 | -0.10 | 0.31  |
| 124 | ADH1A     | 0.00  | 0.00  | 0.00  | NaN   |
| 125 | ADH1B     | 0.00  | 0.00  | 0.00  | NaN   |
| 126 | ADH1C     | 0.00  | 0.00  | 0.00  | NaN   |
| 128 | ADH5      | 0.00  | 0.00  | 0.00  | NaN   |
| 130 | ADH6      | 0.00  | 0.00  | 0.00  | NaN   |
| 131 | ADH7      | 0.00  | 0.00  | 0.00  | NaN   |
| 132 | ADK       | 0.09  | 0.00  | 0.00  | 0.42  |
| 133 | ADM       | 0.00  | 0.00  | 0.00  | NaN   |
| 134 | ADORA1    | 0.00  | 0.13  | 0.00  | 0.08  |
| 135 | ADORA2A   | 0.00  | 0.00  | 0.00  | NaN   |
| 136 | ADORA2B   | 0.09  | 0.00  | 0.00  | -0.14 |

|     |         |       |       |       |       |
|-----|---------|-------|-------|-------|-------|
| 140 | ADORA3  | 0.09  | 0.00  | 0.00  | 0.11  |
| 141 | ADPRH   | 0.00  | 0.00  | 0.00  | NaN   |
| 142 | ADPRT   | 0.09  | 0.13  | 0.00  | 0.08  |
| 143 | ADPRTL1 | 0.00  | -0.13 | -0.15 | 0.44  |
| 146 | ADRA1D  | 0.00  | 0.00  | 0.00  | 0.09  |
| 147 | ADRA1B  | 0.00  | 0.00  | 0.00  | NaN   |
| 150 | ADRA2A  | 0.00  | 0.00  | 0.00  | 0.01  |
| 151 | ADRA2B  | 0.00  | 0.00  | 0.00  | NaN   |
| 152 | ADRA2C  | 0.00  | -0.13 | -0.15 | 0.00  |
| 153 | ADRB1   | 0.09  | 0.00  | -0.05 | -0.10 |
| 154 | ADRB2   | 0.00  | 0.00  | 0.00  | NaN   |
| 155 | ADRB3   | 0.55  | -0.13 | -0.05 | -0.09 |
| 156 | ADRBK1  | 0.45  | 0.00  | 0.05  | 0.59  |
| 157 | ADRBK2  | 0.00  | 0.00  | -0.05 | -0.12 |
| 158 | ADSL    | 0.00  | 0.00  | 0.50  | 0.43  |
| 159 | ADSS    | 0.00  | 0.13  | 0.00  | 0.31  |
| 161 | AP2A2   | -0.18 | -0.13 | -0.05 | 0.50  |
| 162 | AP1B1   | -0.09 | 0.00  | 0.05  | 0.15  |
| 163 | AP2B1   | 0.00  | 0.00  | 0.00  | 0.48  |
| 164 | AP1G1   | 0.00  | 0.00  | 0.05  | 0.49  |
| 165 | AEBP1   | 0.00  | 0.00  | 0.00  | NaN   |
| 166 | AES     | 0.00  | 0.00  | 0.00  | NaN   |
| 167 | AEGL1   | 0.00  | 0.00  | 0.00  | NaN   |
| 173 | AFM     | 0.00  | 0.00  | 0.00  | NaN   |
| 174 | AFP     | 0.00  | 0.00  | 0.00  | NaN   |
| 175 | AGA     | 0.00  | 0.00  | -0.10 | 0.37  |
| 176 | AGC1    | 0.00  | 0.00  | -0.05 | 0.11  |
| 177 | AGER    | 0.00  | 0.00  | 0.00  | -0.01 |
| 178 | AGL     | 0.00  | 0.00  | 0.00  | NaN   |
| 181 | AGRP    | -0.09 | 0.00  | 0.05  | -0.16 |
| 182 | JAG1    | 0.00  | 0.00  | 0.05  | 0.10  |
| 183 | AGT     | 0.09  | 0.00  | 0.00  | -0.04 |
| 185 | AGTR1   | 0.00  | 0.00  | 0.00  | NaN   |
| 187 | AGTRL1  | 0.00  | 0.00  | 0.00  | NaN   |
| 189 | AGXT    | 0.00  | 0.00  | -0.05 | 0.18  |
| 191 | AHCY    | 0.00  | -0.13 | 0.00  | 0.37  |
| 196 | AHR     | 0.00  | 0.13  | 0.00  | -0.09 |
| 197 | AHSG    | 0.09  | 0.00  | 0.05  | 0.10  |
| 199 | AIF1    | 0.00  | 0.00  | 0.00  | NaN   |
| 202 | AIM1    | 0.00  | 0.00  | 0.10  | 0.47  |
| 203 | AK1     | -0.09 | 0.00  | 0.00  | 0.19  |
| 204 | AK2     | 0.00  | 0.00  | 0.00  | NaN   |
| 205 | AK3     | 0.00  | 0.50  | 0.00  | 0.18  |
| 207 | AKT1    | 0.00  | 0.00  | 0.00  | NaN   |
| 208 | AKT2    | 0.00  | 0.00  | 0.00  | NaN   |
| 210 | ALAD    | 0.00  | 0.00  | 0.00  | NaN   |
| 211 | ALAS1   | -0.09 | 0.00  | -0.10 | 0.19  |



|     |         |       |       |       |       |
|-----|---------|-------|-------|-------|-------|
| 214 | ALCAM   | 0.09  | 0.00  | 0.00  | 0.20  |
| 215 | ABCD1   | 0.00  | 0.00  | 0.00  | NaN   |
| 216 | ALDH1A1 | 0.00  | 0.00  | -0.05 | -0.21 |
| 217 | ALDH2   | 0.00  | 0.00  | 0.00  | NaN   |
| 218 | ALDH3A1 | 0.00  | -0.13 | 0.00  | 0.03  |
| 219 | ALDH1B1 | -0.09 | 0.00  | 0.00  | 0.20  |
| 220 | ALDH1A3 | 0.00  | 0.00  | 0.00  | NaN   |
| 221 | ALDH3B1 | 0.18  | 0.00  | 0.05  | 0.33  |
| 222 | ALDH3B2 | 0.27  | 0.00  | 0.05  | 0.28  |
| 223 | ALDH9A1 | 0.00  | 0.00  | 0.00  | NaN   |
| 224 | ALDH3A2 | 0.00  | -0.13 | 0.00  | 0.24  |
| 225 | ABCD2   | 0.00  | 0.00  | -0.05 | 0.16  |
| 226 | ALDOA   | 0.00  | 0.00  | 0.00  | NaN   |
| 229 | ALDOB   | 0.00  | 0.00  | 0.00  | NaN   |
| 230 | ALDOC   | 0.00  | 0.38  | 0.00  | 0.64  |
| 231 | AKR1B1  | 0.00  | 0.00  | 0.00  | NaN   |
| 238 | ALK     | 0.00  | 0.00  | 0.00  | NaN   |
| 239 | ALOX12  | 0.00  | 0.00  | 0.00  | NaN   |
| 240 | ALOX5   | 0.00  | 0.00  | 0.00  | NaN   |
| 241 | ALOX5AP | 0.00  | 0.00  | 0.10  | -0.10 |
| 242 | ALOX12B | 0.00  | 0.00  | 0.00  | NaN   |
| 244 | ANXA8   | 0.00  | 0.00  | 0.00  | NaN   |
| 246 | ALOX15  | 0.00  | 0.00  | 0.00  | NaN   |
| 247 | ALOX15B | 0.00  | 0.00  | 0.00  | NaN   |
| 248 | ALPI    | 0.00  | 0.00  | 0.00  | NaN   |
| 249 | ALPL    | -0.09 | 0.00  | 0.00  | 0.05  |
| 250 | ALPP    | 0.00  | 0.00  | 0.00  | NaN   |
| 251 | ALPPL2  | 0.00  | 0.00  | 0.00  | NaN   |
| 257 | ALX3    | 0.09  | 0.00  | 0.00  | 0.05  |
| 258 | AMBN    | 0.00  | 0.00  | 0.05  | -0.08 |
| 259 | AMBP    | 0.00  | 0.00  | 0.00  | NaN   |
| 262 | AMD1    | 0.00  | 0.00  | 0.05  | 0.19  |
| 267 | AMFR    | 0.00  | 0.00  | 0.00  | NaN   |
| 268 | AMH     | 0.00  | 0.00  | 0.50  | 0.33  |
| 269 | AMHR2   | 0.00  | 0.00  | 0.00  | NaN   |
| 270 | AMPD1   | 0.18  | 0.00  | 0.10  | 0.24  |
| 271 | AMPD2   | 0.09  | 0.00  | 0.05  | 0.52  |
| 272 | AMPD3   | 0.00  | 0.00  | 0.00  | NaN   |
| 273 | AMPH    | 0.00  | 0.00  | 0.00  | NaN   |
| 274 | BIN1    | 0.00  | 0.00  | -0.05 | 0.12  |
| 275 | AMT     | -0.09 | 0.00  | -0.05 | 0.13  |
| 276 | AMY1A   | 0.00  | 0.13  | 0.00  | -0.05 |
| 283 | ANG     | 0.00  | 0.00  | 0.00  | NaN   |
| 284 | ANGPT1  | 0.18  | 0.13  | 0.00  | 0.12  |
| 285 | ANGPT2  | -0.09 | -0.25 | -0.10 | 0.23  |
| 286 | ANK1    | 0.45  | -0.13 | -0.05 | 0.34  |
| 287 | ANK2    | 0.00  | 0.00  | 0.00  | NaN   |

|     |         |       |       |       |       |
|-----|---------|-------|-------|-------|-------|
| 288 | ANK3    | 0.00  | 0.00  | 0.05  | 0.00  |
| 290 | ANPEP   | 0.00  | 0.00  | 0.00  | NaN   |
| 291 | SLC25A4 | 0.00  | 0.00  | -0.05 | 0.16  |
| 301 | ANXA1   | 0.00  | 0.00  | -0.05 | -0.14 |
| 302 | ANXA2   | 0.00  | 0.00  | 0.00  | NaN   |
| 306 | ANXA3   | 0.00  | 0.00  | 0.00  | NaN   |
| 307 | ANXA4   | 0.00  | 0.00  | 0.00  | NaN   |
| 308 | ANXA5   | 0.00  | 0.00  | 0.00  | NaN   |
| 309 | ANXA6   | 0.00  | 0.00  | 0.00  | NaN   |
| 310 | ANXA7   | 0.09  | 0.00  | 0.00  | 0.38  |
| 311 | ANXA11  | 0.09  | 0.00  | 0.00  | 0.23  |
| 312 | ANXA13  | 0.18  | 0.25  | 0.00  | 0.33  |
| 313 | AOAH    | 0.00  | 0.00  | 0.00  | NaN   |
| 314 | AOC2    | 0.00  | -0.13 | 0.00  | 0.06  |
| 316 | AOX1    | 0.00  | 0.00  | 0.00  | NaN   |
| 317 | APAF1   | 0.00  | 0.13  | 0.00  | 0.19  |
| 318 | NUDT2   | -0.09 | 0.13  | 0.10  | 0.65  |
| 319 | APOF    | 0.00  | 0.00  | 0.00  | NaN   |
| 320 | APBA1   | 0.00  | 0.00  | 0.00  | NaN   |
| 321 | APBA2   | 0.00  | -0.13 | 0.00  | 0.15  |
| 322 | APBB1   | 0.00  | -0.13 | 0.00  | 0.15  |
| 323 | APBB2   | 0.00  | 0.00  | 0.05  | 0.03  |
| 324 | APC     | -0.09 | 0.00  | 0.05  | 0.14  |
| 325 | APCS    | 0.00  | 0.00  | 0.00  | NaN   |
| 326 | AIRE    | 0.00  | 0.00  | 0.00  | NaN   |
| 327 | APEH    | -0.09 | 0.00  | -0.05 | 0.41  |
| 328 | APEX    | 0.00  | 0.50  | 0.00  | 0.04  |
| 329 | BIRC2   | 0.00  | 0.13  | 0.00  | 0.17  |
| 330 | BIRC3   | 0.00  | 0.13  | 0.00  | -0.03 |
| 332 | BIRC5   | 0.00  | 0.13  | 0.00  | 0.19  |
| 333 | APLP1   | 0.00  | 0.00  | 0.00  | NaN   |
| 334 | APLP2   | 0.00  | 0.00  | 0.00  | 0.35  |
| 335 | APOA1   | -0.09 | 0.00  | 0.00  | -0.02 |
| 336 | APOA2   | 0.00  | 0.00  | 0.00  | NaN   |
| 337 | APOA4   | -0.09 | 0.00  | 0.00  | -0.05 |
| 338 | APOB    | 0.09  | 0.00  | -0.05 | 0.15  |
| 339 | APOBEC1 | -0.09 | 0.00  | 0.00  | -0.10 |
| 341 | APOC1   | 0.09  | 0.00  | 0.00  | -0.08 |
| 343 | AQP8    | 0.00  | 0.00  | 0.00  | NaN   |
| 344 | APOC2   | 0.09  | 0.00  | 0.00  | 0.15  |
| 345 | APOC3   | -0.09 | 0.00  | 0.00  | -0.06 |
| 346 | APOC4   | 0.09  | 0.00  | 0.00  | -0.17 |
| 347 | APOD    | 0.18  | 0.13  | 0.20  | -0.11 |
| 348 | APOE    | 0.09  | 0.00  | 0.00  | 0.28  |
| 350 | APOH    | 0.18  | 0.13  | 0.00  | -0.42 |
| 351 | APP     | 0.00  | 0.00  | 0.00  | NaN   |
| 353 | APRT    | 0.09  | -0.13 | -0.05 | 0.09  |

|     |         |       |       |       |       |
|-----|---------|-------|-------|-------|-------|
| 354 | KLK3    | 0.00  | 0.00  | 0.00  | NaN   |
| 355 | TNFRSF6 | 0.09  | 0.00  | 0.00  | 0.11  |
| 356 | TNFSF6  | 0.00  | 0.00  | 0.00  | NaN   |
| 358 | AQP1    | 0.00  | 0.13  | 0.00  | 0.45  |
| 359 | AQP2    | 0.00  | 0.00  | 0.00  | NaN   |
| 360 | AQP3    | -0.09 | 0.00  | 0.10  | -0.14 |
| 361 | AQP4    | 0.00  | 0.00  | -0.15 | 0.26  |
| 362 | AQP5    | 0.00  | 0.00  | 0.00  | NaN   |
| 363 | AQP6    | 0.00  | 0.00  | 0.00  | NaN   |
| 364 | AQP7    | 0.00  | 0.00  | 0.50  | 0.03  |
| 368 | ABCC6   | 0.00  | 0.00  | 0.00  | NaN   |
| 372 | ARCN1   | 0.00  | 0.00  | 0.00  | NaN   |
| 373 | ARFD1   | 0.00  | 0.00  | 0.00  | NaN   |
| 374 | AREG    | 0.00  | 0.00  | 0.00  | NaN   |
| 375 | ARF1    | 0.09  | 0.00  | 0.00  | 0.40  |
| 377 | ARF3    | 0.00  | 0.00  | 0.00  | NaN   |
| 378 | ARF4    | 0.00  | 0.00  | -0.10 | 0.18  |
| 379 | ARF4L   | 0.00  | 0.00  | 0.00  | -0.06 |
| 381 | ARF5    | 0.00  | 0.25  | 0.00  | 0.36  |
| 382 | ARF6    | 0.00  | 0.00  | 0.00  | NaN   |
| 383 | ARG1    | 0.00  | 0.00  | 0.00  | NaN   |
| 384 | ARG2    | 0.00  | 0.00  | 0.00  | NaN   |
| 387 | ARHA    | -0.09 | 0.00  | -0.05 | 0.36  |
| 388 | ARHB    | 0.09  | 0.00  | -0.05 | 0.36  |
| 389 | ARHC    | 0.09  | 0.00  | 0.05  | 0.49  |
| 390 | ARHE    | 0.00  | 0.00  | 0.00  | NaN   |
| 391 | ARHG    | 0.00  | -0.13 | 0.00  | 0.27  |
| 392 | ARHGAP1 | 0.00  | 0.00  | 0.00  | NaN   |
| 394 | ARHGAP5 | 0.00  | 0.00  | 0.00  | NaN   |
| 396 | ARHGDIA | 0.00  | 0.00  | 0.00  | NaN   |
| 397 | ARHGDIB | -0.09 | 0.00  | 0.00  | 0.09  |
| 398 | ARHGDIG | 0.00  | 0.00  | -0.05 | 0.16  |
| 399 | ARHH    | 0.00  | 0.00  | 0.00  | NaN   |
| 400 | ARL1    | 0.00  | 0.00  | 0.00  | NaN   |
| 401 | ARIX    | 0.00  | 0.00  | 0.00  | -0.05 |
| 402 | ARL2    | 0.00  | 0.00  | 0.00  | NaN   |
| 403 | ARL3    | 0.00  | -0.13 | -0.05 | 0.42  |
| 405 | ARNT    | 0.00  | 0.00  | 0.05  | 0.32  |
| 406 | ARNTL   | 0.00  | 0.00  | 0.00  | NaN   |
| 408 | ARRB1   | 0.09  | 0.00  | 0.00  | 0.57  |
| 409 | ARRB2   | 0.00  | 0.00  | 0.00  | NaN   |
| 410 | ARSA    | 0.00  | -0.25 | 0.00  | -0.14 |
| 411 | ARSB    | 0.00  | 0.00  | 0.00  | NaN   |
| 417 | ART1    | 0.00  | -0.13 | 0.00  | 0.00  |
| 419 | ART3    | 0.00  | 0.00  | 0.00  | NaN   |
| 420 | DO      | 0.00  | 0.00  | 0.00  | -0.16 |
| 421 | ARVCF   | -0.09 | 0.00  | 0.00  | -0.19 |

|     |          |       |       |       |       |
|-----|----------|-------|-------|-------|-------|
| 427 | ASAH     | 0.00  | -0.13 | -0.05 | 0.26  |
| 429 | ASCL1    | 0.00  | 0.00  | 0.00  | NaN   |
| 430 | ASCL2    | 0.00  | -0.13 | 0.00  | -0.11 |
| 432 | ASGR1    | 0.00  | 0.00  | 0.00  | NaN   |
| 433 | ASGR2    | 0.00  | 0.00  | 0.00  | NaN   |
| 434 | ASIP     | 0.00  | -0.13 | 0.00  | -0.03 |
| 439 | ASNA1    | 0.00  | 0.00  | 0.00  | NaN   |
| 440 | ASNS     | 0.18  | 0.00  | 0.00  | 0.37  |
| 443 | ASPA     | 0.00  | 0.00  | 0.00  | NaN   |
| 444 | ASPH     | 0.00  | 0.00  | 0.00  | NaN   |
| 445 | ASS      | 0.00  | 0.00  | 0.00  | NaN   |
| 460 | ASTN     | 0.00  | 0.00  | 0.00  | NaN   |
| 462 | SERPINC1 | 0.00  | 0.00  | 0.05  | -0.26 |
| 463 | ATBF1    | 0.00  | 0.00  | 0.05  | 0.21  |
| 466 | ATF1     | 0.00  | 0.00  | 0.00  | NaN   |
| 467 | ATF3     | 0.00  | 0.00  | 0.00  | NaN   |
| 468 | ATF4     | -0.09 | 0.00  | 0.05  | 0.32  |
| 471 | ATIC     | 0.00  | 0.00  | 0.00  | NaN   |
| 472 | ATM      | 0.00  | 0.00  | 0.00  | NaN   |
| 473 | RERE     | 0.00  | 0.00  | 0.00  | NaN   |
| 474 | ATOH1    | 0.00  | 0.00  | 0.00  | NaN   |
| 475 | ATOX1    | 0.00  | 0.00  | 0.00  | NaN   |
| 476 | ATP1A1   | 0.09  | 0.00  | 0.10  | 0.15  |
| 477 | ATP1A2   | 0.00  | 0.00  | 0.00  | NaN   |
| 478 | ATP1A3   | 0.00  | 0.00  | 0.00  | -0.09 |
| 479 | ATP12A   | 0.00  | -0.13 | -0.15 | 0.08  |
| 481 | ATP1B1   | 0.00  | 0.00  | -0.05 | 0.50  |
| 482 | ATP1B2   | 0.00  | 0.00  | 0.05  | -0.04 |
| 483 | ATP1B3   | 0.00  | 0.00  | 0.00  | NaN   |
| 486 | FXD2     | -0.09 | 0.00  | 0.00  | 0.06  |
| 487 | ATP2A1   | 0.00  | 0.00  | 0.00  | NaN   |
| 488 | ATP2A2   | 0.00  | 0.00  | 0.00  | NaN   |
| 489 | ATP2A3   | 0.00  | 0.00  | 0.00  | NaN   |
| 490 | ATP2B1   | 0.09  | 0.00  | -0.05 | 0.13  |
| 491 | ATP2B2   | 0.00  | 0.00  | 0.00  | NaN   |
| 493 | ATP2B4   | 0.00  | 0.13  | 0.00  | -0.25 |
| 495 | ATP4A    | 0.00  | 0.00  | 0.00  | NaN   |
| 496 | ATP4B    | -0.09 | -0.13 | -0.05 | 0.13  |
| 498 | ATP5A1   | -0.09 | -0.13 | -0.20 | 0.71  |
| 501 | ALDH7A1  | 0.00  | 0.00  | 0.00  | NaN   |
| 506 | ATP5B    | 0.00  | 0.00  | 0.00  | NaN   |
| 513 | ATP5D    | 0.00  | 0.00  | 0.00  | NaN   |
| 514 | ATP5E    | 0.18  | 0.25  | 0.00  | 0.49  |
| 515 | ATP5F1   | 0.09  | 0.00  | 0.00  | 0.42  |
| 516 | ATP5G1   | 0.00  | 0.38  | 0.00  | 0.44  |
| 517 | ATP5G2   | 0.00  | 0.00  | 0.00  | NaN   |
| 518 | ATP5G3   | 0.00  | 0.00  | 0.00  | NaN   |

|     |          |       |       |       |       |
|-----|----------|-------|-------|-------|-------|
| 521 | ATP5I    | 0.00  | -0.13 | -0.10 | 0.11  |
| 522 | ATP5J    | 0.00  | 0.00  | 0.00  | NaN   |
| 523 | ATP6V1A1 | 0.00  | 0.00  | 0.00  | NaN   |
| 525 | ATP6V1B1 | 0.00  | 0.00  | 0.05  | -0.11 |
| 526 | ATP6V1B2 | -0.09 | -0.38 | -0.10 | 0.44  |
| 527 | ATP6V0C  | 0.00  | 0.00  | 0.00  | NaN   |
| 528 | ATP6V1C1 | 0.18  | 0.00  | 0.00  | 0.09  |
| 529 | ATP6V1E  | 0.00  | 0.00  | 0.00  | 0.55  |
| 533 | ATP6V0B  | 0.00  | 0.00  | 0.00  | NaN   |
| 534 | ATP6V1G2 | 0.00  | 0.00  | 0.00  | NaN   |
| 535 | ATP6V0A1 | 0.00  | -0.13 | 0.00  | 0.13  |
| 539 | ATP5O    | 0.00  | 0.00  | 0.00  | NaN   |
| 540 | ATP7B    | 0.00  | 0.00  | 0.00  | NaN   |
| 545 | ATR      | 0.00  | 0.00  | -0.05 | 0.33  |
| 546 | ATRX     | 0.00  | 0.00  | 0.00  | NaN   |
| 547 | ATSV     | 0.00  | 0.00  | -0.05 | 0.12  |
| 549 | AUH      | 0.00  | 0.00  | 0.00  | NaN   |
| 550 | AUP1     | 0.00  | 0.00  | 0.00  | NaN   |
| 551 | AVP      | 0.00  | 0.00  | 0.00  | NaN   |
| 552 | AVPR1A   | 0.09  | 0.00  | 0.00  | 0.39  |
| 553 | AVPR1B   | 0.00  | 0.13  | 0.00  | -0.02 |
| 558 | AXL      | 0.00  | 0.00  | -0.05 | -0.02 |
| 563 | AZGP1    | 0.18  | 0.00  | 0.00  | -0.17 |
| 566 | AZU1     | 0.00  | 0.00  | 0.00  | NaN   |
| 567 | B2M      | 0.00  | 0.00  | -0.05 | 0.87  |
| 570 | BAAT     | 0.00  | 0.00  | 0.00  | NaN   |
| 571 | BACH1    | 0.00  | 0.00  | 0.00  | NaN   |
| 572 | BAD      | 0.00  | 0.00  | 0.00  | NaN   |
| 573 | BAG1     | -0.09 | 0.00  | 0.05  | 0.10  |
| 574 | BAGE     | 0.00  | 0.00  | -0.10 | 0.00  |
| 575 | BAI1     | 0.18  | 0.13  | 0.10  | 0.13  |
| 576 | BAI2     | 0.00  | 0.00  | 0.00  | NaN   |
| 577 | BAI3     | 0.00  | 0.00  | 0.00  | NaN   |
| 578 | BAK1     | 0.00  | 0.00  | 0.00  | NaN   |
| 579 | BAPX1    | 0.00  | 0.00  | -0.05 | -0.03 |
| 580 | BARD1    | 0.00  | 0.00  | 0.00  | NaN   |
| 581 | BAX      | 0.09  | 0.00  | 0.00  | -0.05 |
| 585 | BBS4     | 0.00  | 0.00  | 0.00  | NaN   |
| 586 | BCAT1    | 0.00  | 0.00  | 0.00  | NaN   |
| 587 | BCAT2    | 1.00  | 0.00  | 0.00  | -0.03 |
| 590 | BCHE     | 0.00  | 0.00  | 0.00  | NaN   |
| 593 | BCKDHA   | 0.00  | 0.00  | -0.05 | 0.15  |
| 594 | BCKDHB   | 0.00  | 0.00  | 0.00  | NaN   |
| 595 | CCND1    | 0.55  | 0.25  | 0.00  | 0.53  |
| 596 | BCL2     | -0.09 | 0.00  | -0.15 | 0.19  |
| 597 | BCL2A1   | 0.00  | 0.00  | 0.00  | NaN   |
| 598 | BCL2L1   | 0.00  | 0.00  | 0.05  | 0.00  |

|     |          |       |       |       |       |
|-----|----------|-------|-------|-------|-------|
| 599 | BCL2L2   | 0.00  | 0.00  | 0.00  | NaN   |
| 602 | BCL3     | 0.09  | 0.00  | 0.00  | 0.18  |
| 604 | BCL6     | 0.00  | 0.00  | 0.10  | 0.01  |
| 605 | BCL7A    | 0.00  | -0.13 | 0.00  | 0.05  |
| 607 | BCL9     | 0.00  | 0.00  | 0.05  | 0.32  |
| 608 | TNFRSF17 | 0.00  | 0.00  | 0.00  | NaN   |
| 610 | HCN2     | 0.00  | 0.00  | 0.00  | -0.03 |
| 611 | OPN1SW   | 0.00  | 0.25  | 0.00  | 0.02  |
| 613 | BCR      | 0.00  | 0.00  | 0.00  | NaN   |
| 617 | BCS1L    | 0.00  | 0.00  | 0.00  | NaN   |
| 622 | BDH      | 0.18  | 0.00  | 0.00  | 0.57  |
| 623 | BDKRB1   | 0.00  | 0.00  | 0.00  | NaN   |
| 624 | BDKRB2   | 0.00  | 0.00  | 0.00  | NaN   |
| 627 | BDNF     | 0.00  | 0.00  | 0.00  | NaN   |
| 629 | BF       | 0.00  | 0.00  | 0.00  | NaN   |
| 631 | BFSP1    | 0.00  | 0.00  | 0.00  | NaN   |
| 632 | BGLAP    | 0.00  | 1.00  | 0.00  | 0.10  |
| 634 | CEACAM1  | 0.09  | 0.00  | -0.05 | 0.18  |
| 635 | BHMT     | 0.00  | 0.00  | 0.00  | NaN   |
| 636 | BICD1    | 0.00  | 0.00  | 0.00  | NaN   |
| 637 | BID      | 0.00  | 0.00  | 0.00  | 0.29  |
| 638 | BIK      | 0.00  | 0.00  | 0.00  | NaN   |
| 640 | BLK      | -0.09 | -0.50 | -0.15 | -0.15 |
| 641 | BLM      | 0.00  | 0.00  | 0.00  | NaN   |
| 642 | BLMH     | 0.00  | 0.38  | 0.00  | 0.16  |
| 643 | BLR1     | 0.00  | 0.00  | 0.00  | NaN   |
| 644 | BLVRA    | 0.00  | 0.00  | 0.00  | NaN   |
| 645 | BLVRB    | 0.00  | 0.00  | 0.00  | NaN   |
| 648 | BMI1     | -0.09 | 0.00  | 0.05  | 0.05  |
| 649 | BMP1     | 0.00  | 0.50  | 0.50  | 0.27  |
| 650 | BMP2     | 0.00  | 0.00  | 0.00  | NaN   |
| 651 | BMP3     | 0.00  | 0.00  | 0.00  | NaN   |
| 652 | BMP4     | 0.00  | 0.00  | 0.05  | 0.26  |
| 653 | BMP5     | 0.00  | 0.00  | 0.00  | NaN   |
| 654 | BMP6     | 0.00  | 0.00  | 0.00  | NaN   |
| 655 | BMP7     | 0.27  | 0.50  | 0.00  | 0.65  |
| 656 | BMP8     | 0.00  | 0.00  | 0.00  | NaN   |
| 657 | BMPR1A   | 0.09  | 0.00  | -0.05 | 0.61  |
| 658 | BMPR1B   | 0.00  | 0.00  | 0.00  | NaN   |
| 659 | BMPR2    | 0.00  | 0.00  | 0.00  | NaN   |
| 661 | BN51T    | -0.09 | -0.25 | -0.05 | 0.34  |
| 662 | BNIP1    | 0.00  | 0.00  | 0.00  | NaN   |
| 663 | BNIP2    | 0.00  | 0.00  | 0.05  | 0.11  |
| 664 | BNIP3    | 0.00  | 0.00  | -0.05 | 0.21  |
| 665 | BNIP3L   | -0.09 | -0.25 | -0.05 | 0.18  |
| 666 | BOK      | 0.00  | 0.00  | -0.05 | 0.02  |
| 667 | BPAG1    | 0.00  | 0.13  | 0.00  | 0.00  |

|     |          |       |       |       |       |
|-----|----------|-------|-------|-------|-------|
| 668 | FOXL2    | 0.00  | 0.00  | 0.00  | NaN   |
| 669 | BPGM     | 0.00  | 0.00  | 0.00  | NaN   |
| 670 | BPHL     | 0.00  | 0.00  | -0.05 | 0.27  |
| 671 | BPI      | 0.00  | -0.13 | 0.00  | -0.14 |
| 672 | BRCA1    | 0.00  | -0.13 | 0.00  | 0.08  |
| 673 | BRAF     | 0.00  | 0.00  | 0.00  | NaN   |
| 675 | BRCA2    | 0.00  | 0.00  | 0.00  | NaN   |
| 676 | BRDT     | 0.00  | 0.00  | 0.00  | NaN   |
| 677 | ZFP36L1  | 0.00  | 0.00  | 0.00  | NaN   |
| 678 | ZFP36L2  | 0.50  | 0.00  | 0.50  | -0.17 |
| 682 | BSG      | 0.00  | 0.00  | -0.05 | 0.18  |
| 683 | BST1     | 0.00  | 0.00  | -0.10 | -0.07 |
| 684 | BST2     | -0.09 | 0.00  | 0.00  | 0.08  |
| 685 | BTC      | 0.00  | 0.00  | 0.00  | NaN   |
| 686 | BTD      | 0.00  | 0.00  | 0.05  | 0.51  |
| 687 | BTEB1    | 0.00  | 0.00  | 0.00  | NaN   |
| 688 | KLF5     | 0.00  | 0.50  | 0.00  | 0.13  |
| 689 | BTF3     | 0.00  | 0.00  | 0.00  | NaN   |
| 690 | BTF3L1   | 0.00  | 0.50  | 0.50  | 0.22  |
| 694 | BTG1     | 0.00  | 0.00  | 0.00  | NaN   |
| 696 | BTN1A1   | 0.00  | 0.00  | 0.00  | NaN   |
| 699 | BUB1     | 0.00  | 0.00  | 0.00  | NaN   |
| 701 | BUB1B    | 0.00  | 0.00  | 0.00  | NaN   |
| 705 | BYSL     | 0.00  | 0.00  | 0.05  | 0.30  |
| 706 | BZRP     | 0.00  | 0.00  | 0.50  | 0.31  |
| 708 | C1QBP    | 0.00  | -0.13 | 0.00  | 0.08  |
| 710 | SERPING1 | 0.00  | 0.00  | 0.00  | NaN   |
| 711 | C1orf1   | 0.00  | 0.00  | -0.10 | -0.04 |
| 712 | C1QA     | -0.09 | 0.00  | 0.00  | -0.21 |
| 713 | C1QB     | -0.09 | 0.00  | 0.00  | 0.19  |
| 715 | C1R      | 0.00  | 0.00  | 0.00  | 0.03  |
| 716 | C1S      | 0.00  | 0.00  | 0.00  | 0.02  |
| 717 | C2       | 0.00  | 0.00  | 0.00  | NaN   |
| 718 | C3       | 0.00  | 0.00  | 0.00  | NaN   |
| 719 | C3AR1    | -0.09 | 0.00  | 0.00  | -0.07 |
| 720 | C4A      | 0.00  | 0.00  | 0.00  | NaN   |
| 721 | C4B      | 0.00  | 0.00  | 0.00  | NaN   |
| 722 | C4BPA    | 0.00  | 0.13  | 0.00  | -0.16 |
| 725 | C4BPB    | 0.00  | 0.13  | 0.00  | -0.05 |
| 726 | CAPN5    | 0.50  | 0.00  | 0.00  | 0.27  |
| 727 | C5       | 0.00  | 0.00  | -0.05 | 0.21  |
| 728 | C5R1     | 0.09  | 0.00  | -0.05 | 0.14  |
| 729 | C6       | 0.00  | 0.00  | 0.10  | -0.11 |
| 730 | C7       | 0.00  | 0.00  | 0.10  | 0.15  |
| 731 | C8A      | 0.00  | 0.00  | -0.05 | -0.09 |
| 732 | C8B      | 0.00  | 0.00  | -0.05 | 0.00  |
| 733 | C8G      | 0.00  | 0.00  | 0.00  | NaN   |

|     |          |       |       |       |       |
|-----|----------|-------|-------|-------|-------|
| 734 | C8orf1   | 0.18  | 0.25  | 0.05  | 0.59  |
| 735 | C9       | 0.09  | 0.00  | 0.05  | -0.11 |
| 738 | C11orf2  | -0.09 | 0.00  | 0.00  | 0.18  |
| 740 | MRPL49   | -0.09 | 0.00  | 0.00  | 0.30  |
| 741 | C11orf5  | -0.09 | 0.00  | 0.00  | 0.07  |
| 744 | C11orf8  | 0.00  | 0.00  | 0.00  | NaN   |
| 745 | C11orf9  | -0.09 | 0.00  | 0.00  | -0.04 |
| 746 | C11orf10 | -0.09 | 0.00  | 0.00  | 0.40  |
| 747 | C11orf11 | -0.09 | 0.00  | 0.00  | -0.29 |
| 750 | C16orf3  | -0.09 | -0.13 | -0.05 | -0.25 |
| 752 | FMNL     | 0.00  | -0.13 | 0.00  | 0.02  |
| 753 | C18orf1  | 0.00  | 0.00  | 0.00  | NaN   |
| 754 | PTTG1IP  | 0.00  | 0.00  | 0.00  | NaN   |
| 755 | C21orf2  | 0.00  | 0.00  | 0.00  | NaN   |
| 757 | C21orf4  | 0.00  | 0.00  | 0.00  | NaN   |
| 758 | C22orf1  | 0.00  | 0.00  | 0.05  | -0.26 |
| 759 | CA1      | 0.00  | 0.00  | 0.00  | NaN   |
| 760 | CA2      | 0.18  | 0.00  | 0.00  | 0.22  |
| 761 | CA3      | 0.18  | 0.00  | 0.00  | -0.12 |
| 762 | CA4      | 0.18  | 0.13  | 0.00  | 0.19  |
| 763 | CA5A     | -0.09 | -0.13 | -0.05 | -0.17 |
| 765 | CA6      | 0.00  | 0.00  | 0.00  | NaN   |
| 766 | CA7      | -0.09 | 0.00  | 0.00  | -0.26 |
| 767 | CA8      | 0.00  | 0.00  | 0.00  | NaN   |
| 768 | CA9      | -0.09 | 0.00  | 0.10  | 0.28  |
| 770 | CA11     | 0.18  | 0.00  | 0.00  | -0.14 |
| 771 | CA12     | 0.00  | 0.00  | 0.00  | NaN   |
| 773 | CACNA1A  | 0.00  | 0.00  | 0.00  | NaN   |
| 774 | CACNA1B  | 0.00  | 0.00  | 0.05  | -0.08 |
| 775 | CACNA1C  | 0.00  | 0.00  | 0.05  | 0.15  |
| 776 | CACNA1D  | 0.00  | 0.00  | -0.10 | 0.32  |
| 777 | CACNA1E  | 0.00  | 0.00  | 0.00  | NaN   |
| 779 | CACNA1S  | 0.00  | 0.00  | 0.00  | NaN   |
| 780 | DDR1     | 0.00  | 0.00  | 0.00  | NaN   |
| 781 | CACNA2D1 | 0.09  | 0.00  | 0.00  | -0.14 |
| 782 | CACNB1   | 0.00  | 0.75  | 0.00  | 0.47  |
| 783 | CACNB2   | 0.00  | 0.00  | 0.05  | -0.05 |
| 784 | CACNB3   | 0.00  | 0.00  | 0.00  | NaN   |
| 785 | CACNB4   | 0.00  | 0.00  | 0.00  | NaN   |
| 786 | CACNG1   | 0.18  | 0.13  | 0.00  | 0.24  |
| 788 | SLC25A20 | -0.09 | 0.00  | -0.05 | 0.25  |
| 790 | CAD      | 0.09  | 0.00  | 0.05  | 0.45  |
| 793 | CALB1    | 0.18  | 0.25  | 0.05  | 0.00  |
| 794 | CALB2    | -0.09 | 0.13  | 0.05  | 0.25  |
| 795 | CALB3    | 0.00  | -0.13 | 0.00  | -0.21 |
| 796 | CALCA    | 0.00  | 0.00  | 0.00  | NaN   |
| 797 | CALCB    | 0.00  | 0.00  | 0.00  | NaN   |



|     |          |       |       |       |       |
|-----|----------|-------|-------|-------|-------|
| 799 | CALCR    | 0.18  | 0.00  | 0.00  | 0.19  |
| 800 | CALD1    | 0.00  | 0.00  | 0.00  | NaN   |
| 801 | CALM1    | 0.33  | 0.33  | 0.00  | 0.25  |
| 811 | CALR     | 0.00  | 0.00  | 0.00  | NaN   |
| 813 | CALU     | 0.00  | 0.25  | 0.00  | 0.30  |
| 814 | CAMK4    | 0.00  | 0.13  | 0.00  | -0.08 |
| 815 | CAMK2A   | 0.00  | 0.00  | 0.00  | NaN   |
| 816 | CAMK2B   | 0.00  | 0.00  | 0.00  | NaN   |
| 818 | CAMK2G   | 0.09  | 0.00  | 0.00  | 0.29  |
| 819 | CAMLG    | 0.00  | -0.13 | 0.00  | 0.22  |
| 820 | CAMP     | -0.09 | 0.00  | -0.05 | 0.05  |
| 821 | CANX     | 0.00  | 0.00  | 0.05  | 0.11  |
| 822 | CAPG     | 0.00  | 0.00  | -0.05 | 0.07  |
| 823 | CAPN1    | -0.09 | 0.00  | 0.00  | 0.07  |
| 824 | CAPN2    | 0.09  | 0.00  | 0.00  | 0.13  |
| 825 | CAPN3    | 0.00  | 0.00  | 0.00  | NaN   |
| 826 | CAPNS1   | 0.00  | 0.00  | 0.00  | NaN   |
| 829 | CAPZA1   | 0.09  | 0.00  | 0.05  | 0.42  |
| 830 | CAPZA2   | 0.00  | 0.25  | 0.00  | 0.50  |
| 831 | CAST     | 0.00  | 0.00  | 0.00  | NaN   |
| 832 | CAPZB    | -0.09 | 0.00  | 0.00  | 0.19  |
| 833 | CARS     | 0.00  | -0.13 | 0.00  | 0.08  |
| 834 | CASP1    | 0.00  | 0.00  | 0.00  | NaN   |
| 835 | CASP2    | 0.00  | 0.00  | -0.05 | 0.30  |
| 836 | CASP3    | 0.00  | 0.00  | -0.05 | 0.47  |
| 837 | CASP4    | 0.00  | 0.00  | 0.00  | NaN   |
| 838 | CASP5    | 0.00  | 0.00  | 0.00  | NaN   |
| 839 | CASP6    | 0.00  | 0.00  | 0.00  | NaN   |
| 840 | CASP7    | 0.09  | -0.13 | -0.05 | 0.58  |
| 841 | CASP8    | 0.00  | 0.00  | 0.00  | NaN   |
| 842 | CASP9    | 0.00  | 0.00  | 0.00  | NaN   |
| 843 | CASP10   | 0.00  | 0.00  | 0.00  | NaN   |
| 844 | CASQ1    | 0.00  | 0.00  | 0.00  | NaN   |
| 845 | CASQ2    | 0.09  | 0.00  | 0.10  | 0.00  |
| 846 | CASR     | 0.00  | 0.00  | 0.00  | NaN   |
| 847 | CAT      | 0.00  | 0.13  | 0.05  | 0.65  |
| 857 | CAV1     | 0.00  | 0.25  | 0.00  | -0.18 |
| 858 | CAV2     | 0.00  | 0.25  | 0.00  | -0.18 |
| 859 | CAV3     | 0.00  | 0.00  | 0.00  | NaN   |
| 860 | RUNX2    | 0.00  | 0.00  | 0.00  | NaN   |
| 861 | RUNX1    | 0.00  | 0.00  | -0.05 | 0.38  |
| 862 | CBFA2T1  | 0.00  | -0.13 | 0.05  | -0.05 |
| 863 | CBFA2T3  | -0.09 | -0.13 | -0.05 | 0.11  |
| 864 | RUNX3    | -0.09 | 0.00  | 0.00  | 0.12  |
| 865 | CBFB     | -0.09 | 0.00  | 0.00  | 0.48  |
| 866 | SERPINA6 | 0.00  | 0.00  | 0.00  | NaN   |
| 867 | CBL      | -0.09 | 0.00  | -0.10 | 0.01  |

|     |          |       |       |       |       |
|-----|----------|-------|-------|-------|-------|
| 868 | CBLB     | 0.00  | 0.00  | 0.00  | NaN   |
| 869 | CBLN1    | -0.09 | 0.00  | -0.05 | 0.20  |
| 871 | SERPINH1 | 0.18  | 0.00  | 0.00  | 0.33  |
| 873 | CBR1     | 0.00  | 0.00  | 0.00  | NaN   |
| 874 | CBR3     | 0.00  | 0.00  | 0.00  | NaN   |
| 875 | CBS      | 0.00  | 0.13  | 0.00  | 0.17  |
| 881 | CCIN     | -0.09 | 0.00  | 0.10  | -0.26 |
| 883 | CCBL1    | 0.00  | 0.00  | 0.00  | NaN   |
| 885 | CCK      | 0.00  | 0.00  | -0.05 | -0.06 |
| 886 | CCKAR    | 0.00  | 0.00  | -0.05 | -0.29 |
| 887 | CCKBR    | 0.00  | -0.13 | 0.00  | 0.15  |
| 889 | CCM1     | 0.18  | 0.00  | 0.00  | 0.52  |
| 890 | CCNA2    | 0.00  | 0.00  | 0.00  | NaN   |
| 891 | CCNB1    | 0.00  | 0.00  | 0.05  | 0.02  |
| 894 | CCND2    | -0.09 | 0.00  | 0.05  | 0.11  |
| 896 | CCND3    | 0.00  | 0.00  | 0.05  | -0.06 |
| 898 | CCNE1    | 0.00  | 0.13  | 0.15  | 0.73  |
| 899 | CCNF     | 0.00  | 0.00  | 0.00  | NaN   |
| 900 | CCNG1    | 0.00  | 0.00  | 0.05  | 0.03  |
| 901 | CCNG2    | 0.00  | 0.00  | 0.00  | NaN   |
| 902 | CCNH     | 0.00  | -0.13 | 0.00  | 0.39  |
| 904 | CCNT1    | 0.00  | 0.00  | 0.00  | NaN   |
| 905 | CCNT2    | 0.00  | 0.00  | -0.05 | 0.23  |
| 908 | CCT6A    | 0.00  | 0.00  | 0.20  | 0.53  |
| 909 | CD1A     | 0.00  | 0.00  | 0.00  | NaN   |
| 910 | CD1B     | 0.00  | 0.00  | 0.00  | NaN   |
| 911 | CD1C     | 0.00  | 0.00  | 0.00  | NaN   |
| 912 | CD1D     | 0.00  | 0.00  | 0.00  | NaN   |
| 913 | CD1E     | 0.00  | 0.00  | 0.00  | NaN   |
| 914 | CD2      | 0.09  | 0.00  | 0.10  | 0.08  |
| 915 | CD3D     | 0.00  | 0.00  | 0.00  | NaN   |
| 916 | CD3E     | 0.00  | 0.00  | 0.00  | NaN   |
| 917 | CD3G     | 0.00  | 0.00  | 0.00  | NaN   |
| 919 | CD3Z     | 0.00  | 0.00  | 0.00  | NaN   |
| 921 | CD5      | 0.00  | 0.00  | 0.00  | NaN   |
| 922 | CD5L     | 0.00  | 0.00  | 0.00  | NaN   |
| 923 | CD6      | 0.00  | 0.00  | 0.00  | NaN   |
| 924 | CD7      | 0.00  | 0.00  | 0.00  | NaN   |
| 925 | CD8A     | 0.00  | 0.00  | 0.00  | 0.19  |
| 926 | CD8B1    | 0.00  | 0.00  | -0.05 | 0.28  |
| 928 | CD9      | -0.09 | 0.00  | 0.00  | 0.20  |
| 929 | CD14     | 0.00  | 0.00  | 0.00  | NaN   |
| 930 | CD19     | 0.00  | 0.00  | 0.00  | NaN   |
| 931 | MS4A2    | 0.00  | 0.00  | 0.00  | NaN   |
| 933 | CD22     | 0.00  | 0.00  | 0.05  | -0.01 |
| 939 | TNFRSF7  | -0.09 | 0.00  | 0.00  | -0.14 |
| 940 | CD28     | 0.00  | 0.00  | 0.00  | NaN   |

|     |         |       |       |       |       |
|-----|---------|-------|-------|-------|-------|
| 941 | CD80    | 0.00  | 0.00  | 0.00  | NaN   |
| 942 | CD86    | 0.00  | 0.00  | 0.00  | NaN   |
| 943 | TNFRSF8 | 0.00  | 0.00  | 0.00  | NaN   |
| 944 | TNFSF8  | 0.00  | 0.00  | 0.00  | NaN   |
| 945 | CD33    | 0.00  | 0.13  | -0.05 | 0.28  |
| 946 | SIGLEC6 | 0.00  | 0.13  | -0.05 | 0.25  |
| 948 | CD36    | 0.09  | 0.00  | 0.00  | 0.04  |
| 949 | CD36L1  | -0.09 | 0.00  | 0.00  | 0.29  |
| 950 | CD36L2  | 0.00  | 0.00  | 0.00  | NaN   |
| 951 | CD37    | 0.00  | 0.00  | 0.00  | NaN   |
| 952 | CD38    | 0.00  | 0.00  | -0.10 | -0.15 |
| 953 | ENTPD1  | 0.00  | 0.00  | -0.05 | 0.25  |
| 954 | ENTPD2  | 0.00  | 0.00  | 0.00  | NaN   |
| 955 | ENTPD6  | 0.00  | 0.00  | -0.05 | 0.26  |
| 956 | ENTPD3  | 0.00  | 0.00  | -0.05 | 0.26  |
| 957 | ENTPD5  | 0.00  | 0.00  | 0.00  | NaN   |
| 958 | TNFRSF5 | 0.00  | 0.00  | 0.00  | NaN   |
| 960 | CD44    | 0.00  | 0.13  | 0.05  | 0.51  |
| 961 | CD47    | 0.00  | 0.00  | 0.00  | NaN   |
| 962 | CD48    | 0.00  | 0.00  | 0.00  | NaN   |
| 963 | CD53    | 0.09  | 0.00  | 0.00  | 0.17  |
| 965 | CD58    | 0.09  | 0.00  | 0.10  | 0.37  |
| 966 | CD59    | 0.00  | 0.00  | 0.05  | 0.27  |
| 967 | CD63    | 0.00  | 0.00  | 0.00  | NaN   |
| 968 | CD68    | 0.00  | 0.00  | 0.00  | NaN   |
| 969 | CD69    | -0.09 | 0.00  | 0.00  | 0.10  |
| 970 | TNFSF7  | 0.00  | 0.00  | 0.00  | NaN   |
| 972 | CD74    | 0.00  | 0.00  | 0.00  | NaN   |
| 973 | CD79A   | 0.00  | 0.00  | -0.05 | 0.07  |
| 974 | CD79B   | 0.27  | 0.13  | 0.00  | 0.10  |
| 975 | CD81    | 0.00  | -0.13 | 0.00  | 0.08  |
| 976 | CD97    | 0.00  | 0.00  | 0.00  | NaN   |
| 977 | CD151   | -0.18 | -0.13 | -0.05 | 0.42  |
| 978 | CDA     | -0.09 | 0.00  | 0.00  | 0.00  |
| 983 | CDC2    | 0.00  | 0.00  | 0.00  | NaN   |
| 984 | CDC2L1  | 0.00  | 0.00  | 0.50  | 0.57  |
| 987 | LRBA    | 0.00  | 0.00  | 0.00  | 0.28  |
| 988 | CDC5L   | 0.00  | 0.00  | 0.00  | NaN   |
| 989 | CDC10   | 0.00  | 0.00  | 0.00  | NaN   |
| 990 | CDC6    | 0.00  | 0.38  | 0.00  | 0.69  |
| 991 | CDC20   | 0.00  | 0.00  | 0.00  | NaN   |
| 993 | CDC25A  | -0.09 | 0.00  | -0.05 | 0.38  |
| 994 | CDC25B  | 0.00  | 0.00  | -0.05 | 0.29  |
| 995 | CDC25C  | 0.00  | 0.00  | 0.00  | NaN   |
| 996 | CDC27   | 0.00  | -0.13 | 0.00  | 0.25  |
| 997 | CDC34   | 0.00  | 0.00  | -0.05 | 0.18  |
| 998 | CDC42   | -0.09 | 0.00  | 0.00  | 0.08  |

|      |         |       |       |       |       |
|------|---------|-------|-------|-------|-------|
| 999  | CDH1    | -0.09 | -0.25 | 0.00  | 0.33  |
| 1000 | CDH2    | 0.00  | 0.00  | -0.10 | 0.26  |
| 1001 | CDH3    | -0.09 | -0.25 | 0.00  | 0.43  |
| 1002 | CDH4    | 0.18  | 0.13  | 0.00  | -0.20 |
| 1003 | CDH5    | -0.09 | -0.13 | 0.00  | -0.01 |
| 1004 | CDH6    | 0.00  | 0.00  | 0.15  | 0.00  |
| 1005 | CDH7    | 0.00  | 0.00  | -0.10 | 0.02  |
| 1006 | CDH8    | 0.00  | -0.13 | 0.00  | -0.01 |
| 1007 | CDH9    | 0.00  | 0.00  | 0.15  | 0.11  |
| 1008 | CDH10   | 0.00  | 0.00  | 0.10  | 0.30  |
| 1009 | CDH11   | 0.00  | 0.00  | 0.00  | NaN   |
| 1010 | CDH12   | 0.00  | 0.00  | 0.10  | 0.11  |
| 1012 | CDH13   | -0.09 | 0.00  | -0.05 | 0.08  |
| 1013 | CDH15   | -0.09 | -0.13 | -0.05 | -0.24 |
| 1014 | CDH16   | -0.09 | -0.13 | 0.00  | 0.16  |
| 1015 | CDH17   | 0.00  | -0.13 | 0.00  | -0.15 |
| 1016 | CDH18   | 0.00  | 0.00  | 0.50  | 0.03  |
| 1017 | CDK2    | 0.00  | 0.00  | 0.00  | NaN   |
| 1018 | CDK3    | 0.00  | 0.13  | 0.00  | 0.14  |
| 1019 | CDK4    | 0.00  | 0.00  | 0.00  | NaN   |
| 1020 | CDK5    | 0.00  | 0.00  | -0.05 | 0.26  |
| 1021 | CDK6    | 0.18  | 0.00  | 0.00  | 0.34  |
| 1022 | CDK7    | 0.00  | 0.00  | 0.00  | NaN   |
| 1024 | CDK8    | 0.00  | -0.13 | -0.05 | 0.22  |
| 1025 | CDK9    | -0.09 | 0.00  | -0.05 | 0.21  |
| 1026 | CDKN1A  | 0.00  | 0.00  | 0.00  | NaN   |
| 1027 | CDKN1B  | -0.09 | 0.00  | 0.00  | 0.15  |
| 1028 | CDKN1C  | 0.00  | -0.13 | -0.05 | 0.20  |
| 1029 | CDKN2A  | -0.18 | -0.13 | -0.25 | 0.62  |
| 1030 | CDKN2B  | -0.18 | -0.13 | -0.35 | 0.21  |
| 1031 | CDKN2C  | 0.00  | 0.00  | 0.00  | NaN   |
| 1032 | CDKN2D  | 0.00  | 0.13  | 0.05  | 0.30  |
| 1033 | CDKN3   | 0.00  | 0.00  | 0.05  | 0.33  |
| 1036 | CDO1    | 0.00  | 0.13  | 0.00  | -0.08 |
| 1039 | CDR2    | 0.00  | 0.00  | 0.00  | NaN   |
| 1040 | CDS1    | 0.00  | 0.00  | 0.00  | NaN   |
| 1041 | CDSN    | 0.00  | 0.00  | 0.00  | NaN   |
| 1043 | CDW52   | -0.09 | 0.00  | 0.00  | 0.21  |
| 1044 | CDX1    | 0.00  | 0.00  | 0.00  | NaN   |
| 1045 | CDX2    | 0.00  | 0.00  | -0.05 | -0.01 |
| 1047 | CLGN    | 0.00  | 0.00  | 0.00  | NaN   |
| 1048 | CEACAM5 | 0.00  | 0.00  | -0.05 | 0.11  |
| 1050 | CEBPA   | 0.00  | 0.00  | 0.05  | -0.04 |
| 1051 | CEBPB   | 0.27  | 0.25  | 0.05  | 0.34  |
| 1052 | CEBPD   | 0.00  | 0.13  | 0.00  | 0.43  |
| 1053 | CEBPE   | 0.00  | 0.00  | 0.00  | NaN   |
| 1054 | CEBPG   | 0.00  | 0.00  | 0.05  | 0.28  |

|      |         |       |       |       |       |
|------|---------|-------|-------|-------|-------|
| 1056 | CEL     | 0.33  | 0.00  | 0.33  | -0.02 |
| 1057 | CELL    | 0.00  | 0.00  | 0.00  | NaN   |
| 1058 | CENPA   | 0.09  | 0.00  | 0.05  | 0.36  |
| 1060 | CENPC1  | 0.00  | 0.00  | 0.00  | NaN   |
| 1062 | CENPE   | 0.00  | 0.00  | 0.00  | NaN   |
| 1063 | CENPF   | 0.09  | 0.00  | 0.00  | 0.28  |
| 1066 | CES1    | 0.50  | 0.00  | 0.00  | -0.01 |
| 1068 | CETN1   | 0.00  | 0.00  | 0.00  | NaN   |
| 1070 | CETN3   | 0.00  | 0.00  | 0.00  | NaN   |
| 1071 | CETP    | -0.09 | 0.00  | 0.00  | -0.08 |
| 1072 | CFL1    | -0.09 | 0.00  | 0.05  | 0.42  |
| 1075 | CTSC    | 0.00  | 0.13  | 0.05  | 0.41  |
| 1080 | CFTR    | 0.00  | -0.13 | 0.00  | -0.19 |
| 1081 | CGA     | 0.00  | 0.00  | 0.00  | NaN   |
| 1082 | CGB     | 1.00  | 0.00  | 0.00  | 0.36  |
| 1084 | CEACAM3 | 0.00  | 0.00  | -0.05 | 0.10  |
| 1087 | CEACAM7 | 0.00  | 0.00  | -0.05 | 0.09  |
| 1088 | CEACAM8 | 0.09  | 0.00  | -0.05 | 0.10  |
| 1089 | CEACAM4 | 0.00  | 0.00  | -0.05 | 0.16  |
| 1101 | CHAD    | 0.00  | 0.25  | 0.00  | -0.04 |
| 1102 | CHC1L   | 0.00  | 0.13  | 0.05  | -0.02 |
| 1103 | CHAT    | 0.00  | 0.00  | 0.00  | NaN   |
| 1104 | CHC1    | 0.00  | 0.00  | 0.00  | NaN   |
| 1105 | CHD1    | 0.00  | 0.00  | 0.00  | NaN   |
| 1106 | CHD2    | 0.00  | 0.00  | 0.00  | NaN   |
| 1107 | CHD3    | 0.00  | 0.00  | 0.00  | NaN   |
| 1108 | CHD4    | -0.09 | 0.00  | 0.00  | 0.28  |
| 1109 | AKR1C4  | 0.00  | 0.00  | 0.05  | -0.01 |
| 1111 | CHEK1   | -0.09 | 0.00  | -0.10 | 0.34  |
| 1112 | CHES1   | 0.00  | 0.13  | 0.00  | 0.07  |
| 1113 | CHGA    | 0.00  | 0.00  | 0.00  | NaN   |
| 1114 | CHGB    | 0.00  | 0.00  | 0.00  | NaN   |
| 1116 | CHI3L1  | 0.00  | 0.13  | 0.00  | -0.07 |
| 1117 | CHI3L2  | 0.09  | 0.00  | 0.00  | -0.06 |
| 1118 | CHIT1   | 0.00  | 0.13  | 0.00  | -0.34 |
| 1119 | CHK     | 0.18  | 0.00  | 0.05  | 0.32  |
| 1120 | CHKL    | 0.00  | -0.25 | 0.05  | 0.10  |
| 1122 | CHML    | 0.00  | 0.00  | 0.00  | NaN   |
| 1123 | CHN1    | 0.00  | 0.00  | 0.00  | NaN   |
| 1124 | CHN2    | 0.00  | 0.13  | 0.00  | 0.16  |
| 1129 | CHRM2   | 0.00  | 0.00  | 0.00  | NaN   |
| 1130 | CHS1    | 0.09  | 0.00  | 0.00  | 0.19  |
| 1132 | CHRM4   | 0.00  | 0.00  | 0.00  | NaN   |
| 1133 | CHRM5   | 0.00  | 0.00  | 0.00  | NaN   |
| 1134 | CHRNA1  | 0.00  | 0.00  | 0.00  | NaN   |
| 1135 | CHRNA2  | -0.09 | -0.25 | -0.10 | -0.05 |
| 1136 | CHRNA3  | 0.00  | 0.00  | 0.05  | 0.07  |

|      |        |       |       |       |       |
|------|--------|-------|-------|-------|-------|
| 1137 | CHRNA4 | 0.09  | 0.00  | 0.00  | 0.21  |
| 1138 | CHRNA5 | 0.00  | 0.00  | 0.00  | NaN   |
| 1139 | CHRNA7 | 0.00  | 0.00  | 0.00  | NaN   |
| 1140 | CHRNB1 | 0.00  | 0.00  | 0.00  | NaN   |
| 1141 | CHRNB2 | 0.09  | 0.25  | 0.00  | -0.16 |
| 1142 | CHRNB3 | 0.27  | 0.00  | -0.05 | 0.41  |
| 1143 | CHRNB4 | 0.00  | 0.00  | 0.00  | NaN   |
| 1144 | CHRND  | 0.00  | 0.00  | 0.00  | NaN   |
| 1145 | CHRNE  | 0.00  | 0.00  | 0.00  | NaN   |
| 1146 | CHRNG  | 0.00  | 0.00  | 0.00  | NaN   |
| 1147 | CHUK   | 0.00  | -0.13 | -0.05 | 0.31  |
| 1149 | CIDEA  | 0.00  | 0.00  | 0.00  | NaN   |
| 1152 | CKB    | 0.09  | 0.00  | 0.00  | 0.05  |
| 1153 | CIRBP  | 0.00  | 0.00  | 0.00  | NaN   |
| 1154 | CISH   | -0.09 | 0.00  | -0.05 | 0.12  |
| 1155 | CKAP1  | 0.00  | 0.00  | 0.00  | NaN   |
| 1158 | CKM    | 0.09  | 0.00  | 0.00  | -0.15 |
| 1159 | CKMT1  | 0.00  | 0.00  | 0.50  | 0.10  |
| 1160 | CKMT2  | 0.00  | 0.00  | 0.00  | NaN   |
| 1161 | CKN1   | 0.00  | 0.00  | 0.00  | NaN   |
| 1163 | CKS1   | 0.09  | 0.13  | 0.00  | 0.21  |
| 1164 | CKS2   | 0.00  | 0.00  | 0.00  | NaN   |
| 1173 | AP2M1  | 0.09  | 0.00  | 0.00  | 0.33  |
| 1174 | AP1S1  | 0.18  | 0.00  | 0.00  | 0.32  |
| 1175 | AP2S1  | 0.09  | 0.00  | 0.00  | 0.48  |
| 1176 | AP3S1  | 0.00  | 0.13  | 0.00  | 0.16  |
| 1178 | CLC    | 0.00  | 0.00  | 0.00  | NaN   |
| 1179 | CLCA1  | 0.00  | 0.00  | 0.10  | 0.14  |
| 1180 | CLCN1  | 0.00  | 0.00  | -0.05 | 0.26  |
| 1181 | CLCN2  | 0.09  | 0.00  | 0.00  | 0.12  |
| 1182 | CLCN3  | 0.00  | 0.00  | -0.05 | 0.25  |
| 1185 | CLCN6  | 0.00  | 0.00  | 0.00  | NaN   |
| 1186 | CLCN7  | 0.00  | 0.00  | 0.00  | NaN   |
| 1187 | CLCNKA | 0.00  | 0.00  | 0.00  | NaN   |
| 1188 | CLCNKB | 0.00  | 0.00  | 0.00  | NaN   |
| 1191 | CLU    | 0.00  | 0.00  | 0.00  | 0.18  |
| 1192 | CLIC1  | 0.00  | 0.00  | 0.00  | NaN   |
| 1196 | CLK2   | 0.09  | 0.13  | 0.00  | 0.46  |
| 1198 | CLK3   | 0.00  | 0.00  | 0.00  | NaN   |
| 1200 | CLN2   | 0.00  | -0.13 | 0.00  | 0.27  |
| 1201 | CLN3   | 0.00  | 0.00  | 0.00  | NaN   |
| 1203 | CLN5   | -0.09 | 0.13  | -0.10 | 0.64  |
| 1207 | CLNS1A | 0.27  | 0.00  | 0.00  | 0.62  |
| 1208 | CLPS   | 0.00  | 0.00  | 0.00  | NaN   |
| 1209 | CLPTM1 | 0.09  | 0.00  | 0.00  | 0.53  |
| 1211 | CLTA   | -0.09 | 0.00  | 0.10  | 0.55  |
| 1212 | CLTB   | 0.00  | 0.00  | 0.00  | NaN   |

|      |         |       |       |       |       |
|------|---------|-------|-------|-------|-------|
| 1213 | CLTC    | 0.18  | 0.13  | 0.00  | 0.64  |
| 1215 | CMA1    | 0.00  | 0.00  | 0.00  | NaN   |
| 1230 | CCR1    | -0.09 | 0.00  | -0.05 | 0.10  |
| 1232 | CCR3    | -0.09 | 0.00  | -0.05 | 0.03  |
| 1233 | CCR4    | 0.00  | -0.13 | 0.00  | -0.07 |
| 1235 | CCR6    | 0.00  | 0.00  | 0.00  | NaN   |
| 1236 | CCR7    | 0.00  | 0.38  | 0.00  | 0.37  |
| 1237 | CCR8    | 0.00  | 0.00  | -0.05 | 0.10  |
| 1238 | CCBP2   | 0.00  | 0.00  | 0.00  | 0.16  |
| 1240 | CMKLR1  | 0.00  | -0.13 | 0.00  | -0.03 |
| 1241 | LTB4R   | 0.00  | 0.00  | 0.00  | NaN   |
| 1244 | ABCC2   | 0.00  | -0.13 | -0.05 | -0.13 |
| 1258 | CNGB1   | 0.00  | 0.00  | 0.00  | -0.05 |
| 1259 | CNGA1   | 0.00  | 0.00  | 0.00  | NaN   |
| 1261 | CNGA3   | 0.00  | 0.00  | 0.00  | NaN   |
| 1263 | CNK     | 0.00  | 0.00  | 0.00  | NaN   |
| 1264 | CNN1    | 0.00  | 0.00  | 0.00  | NaN   |
| 1265 | CNN2    | 0.00  | 0.13  | 0.00  | 0.08  |
| 1266 | CNN3    | 0.09  | 0.00  | 0.05  | 0.47  |
| 1267 | CNP     | 0.00  | 0.13  | 0.00  | 0.32  |
| 1268 | CNR1    | 0.00  | 0.00  | 0.00  | NaN   |
| 1269 | CNR2    | -0.09 | 0.00  | 0.00  | -0.17 |
| 1270 | CNTF    | 0.00  | 0.00  | 0.00  | NaN   |
| 1271 | CNTFR   | -0.09 | 0.13  | 0.10  | -0.23 |
| 1272 | CNTN1   | 0.50  | 0.50  | 0.50  | -0.14 |
| 1277 | COL1A1  | 0.00  | 0.25  | 0.00  | 0.17  |
| 1280 | COL2A1  | 0.00  | 0.00  | 0.00  | NaN   |
| 1281 | COL3A1  | 0.00  | 0.00  | 0.00  | NaN   |
| 1282 | COL4A1  | -0.09 | -0.13 | 0.00  | 0.20  |
| 1284 | COL4A2  | -0.09 | -0.13 | 0.00  | 0.21  |
| 1285 | COL4A3  | 0.00  | 0.00  | 0.00  | NaN   |
| 1286 | COL4A4  | 0.00  | 0.00  | 0.00  | NaN   |
| 1289 | COL5A1  | 0.00  | 0.00  | 0.00  | NaN   |
| 1290 | COL5A2  | 0.00  | 0.00  | 0.00  | NaN   |
| 1291 | COL6A1  | 0.00  | 0.00  | 0.00  | NaN   |
| 1292 | COL6A2  | 0.00  | 0.00  | 0.00  | NaN   |
| 1293 | COL6A3  | 0.00  | 0.00  | -0.05 | 0.07  |
| 1294 | COL7A1  | -0.09 | 0.00  | -0.05 | -0.05 |
| 1295 | COL8A1  | 0.00  | 0.00  | 0.00  | NaN   |
| 1297 | COL9A1  | 0.00  | 0.00  | 0.05  | 0.46  |
| 1298 | COL9A2  | 0.00  | 0.00  | 0.00  | NaN   |
| 1299 | COL9A3  | 0.09  | 0.13  | 0.00  | -0.07 |
| 1300 | COL10A1 | -0.09 | 0.00  | 0.10  | -0.28 |
| 1301 | COL11A1 | 0.00  | 0.00  | 0.00  | NaN   |
| 1305 | COL13A1 | 0.00  | 0.00  | 0.00  | NaN   |
| 1306 | COL15A1 | 0.00  | 0.00  | 0.00  | NaN   |
| 1307 | COL16A1 | 0.00  | 0.00  | 0.00  | NaN   |

|      |         |       |       |       |       |
|------|---------|-------|-------|-------|-------|
| 1308 | COL17A1 | 0.09  | -0.13 | -0.05 | 0.01  |
| 1310 | COL19A1 | -0.09 | 0.00  | 0.05  | 0.27  |
| 1311 | COMP    | 0.00  | 0.00  | 0.00  | NaN   |
| 1312 | COMT    | -0.09 | 0.00  | 0.00  | 0.11  |
| 1314 | COPA    | 0.00  | 0.00  | 0.00  | NaN   |
| 1315 | COPB    | 0.00  | 0.00  | 0.00  | NaN   |
| 1316 | COPEB   | 0.00  | 0.00  | 0.00  | NaN   |
| 1317 | SLC31A1 | 0.00  | 0.00  | 0.00  | NaN   |
| 1318 | SLC31A2 | 0.00  | 0.00  | 0.00  | NaN   |
| 1325 | CORT    | 0.00  | 0.00  | 0.00  | NaN   |
| 1326 | MAP3K8  | -0.09 | -0.13 | 0.00  | 0.47  |
| 1327 | COX4I1  | -0.09 | 0.00  | -0.05 | 0.51  |
| 1329 | COX5B   | 0.00  | 0.00  | 0.00  | NaN   |
| 1337 | COX6A1  | 0.00  | -0.13 | 0.00  | 0.04  |
| 1339 | COX6A2  | 0.00  | 0.00  | 0.00  | NaN   |
| 1340 | COX6B   | 0.00  | 0.00  | 0.00  | NaN   |
| 1345 | COX6C   | 0.09  | 0.00  | 0.05  | 0.33  |
| 1346 | COX7A1  | 0.00  | 0.00  | 0.00  | NaN   |
| 1347 | COX7A2  | 0.00  | 0.00  | 0.05  | 0.27  |
| 1350 | COX7C   | 0.00  | -0.13 | 0.00  | 0.56  |
| 1352 | COX10   | 0.00  | 0.00  | 0.00  | NaN   |
| 1353 | COX11   | 0.00  | 0.00  | 0.00  | 0.44  |
| 1355 | COX15   | 0.00  | -0.13 | -0.05 | 0.35  |
| 1356 | CP      | 0.00  | 0.00  | 0.05  | -0.04 |
| 1357 | CPA1    | 0.00  | 0.25  | 0.05  | 0.14  |
| 1358 | CPA2    | 0.00  | 0.25  | 0.05  | 0.12  |
| 1359 | CPA3    | 0.00  | 0.00  | 0.00  | NaN   |
| 1360 | CPB1    | 0.00  | 0.00  | 0.00  | NaN   |
| 1361 | CPB2    | 0.00  | 0.00  | -0.05 | -0.11 |
| 1362 | CPD     | 0.00  | 0.38  | 0.00  | 0.62  |
| 1363 | CPE     | 0.00  | 0.00  | 0.00  | NaN   |
| 1364 | CLDN4   | -0.09 | 0.00  | 0.00  | 0.06  |
| 1365 | CLDN3   | -0.09 | 0.00  | 0.00  | 0.04  |
| 1366 | CLDN7   | 0.00  | 0.00  | 0.00  | NaN   |
| 1368 | CPM     | 0.09  | 0.13  | 0.00  | -0.02 |
| 1369 | CPN1    | 0.00  | -0.13 | -0.05 | -0.08 |
| 1370 | CPN2    | 0.09  | 0.00  | 0.00  | -0.15 |
| 1371 | CPO     | 0.00  | 0.00  | 0.00  | NaN   |
| 1373 | CPS1    | 0.00  | 0.00  | 0.00  | NaN   |
| 1374 | CPT1A   | 0.45  | 0.00  | 0.00  | 0.64  |
| 1375 | CPT1B   | 0.00  | -0.25 | 0.00  | 0.22  |
| 1376 | CPT2    | 0.00  | 0.00  | 0.00  | NaN   |
| 1378 | CR1     | 0.09  | 0.13  | 0.00  | -0.03 |
| 1380 | CR2     | 0.09  | 0.13  | 0.00  | -0.08 |
| 1381 | CRABP1  | 0.50  | 0.00  | 0.00  | 0.10  |
| 1382 | CRABP2  | 0.00  | 0.13  | 0.00  | 0.27  |
| 1384 | CRAT    | 0.00  | 0.00  | 0.00  | NaN   |



|      |        |       |       |       |       |
|------|--------|-------|-------|-------|-------|
| 1385 | CREB1  | 0.00  | 0.00  | 0.00  | NaN   |
| 1386 | ATF2   | 0.00  | 0.00  | 0.00  | NaN   |
| 1387 | CREBBP | 0.00  | 0.00  | 0.00  | NaN   |
| 1388 | CREBL1 | 0.18  | 0.00  | 0.00  | 0.07  |
| 1389 | CREBL2 | -0.09 | 0.00  | 0.00  | 0.35  |
| 1390 | CREM   | -0.09 | 0.00  | 0.05  | 0.50  |
| 1392 | CRH    | 0.00  | 0.00  | 0.05  | 0.18  |
| 1393 | CRHBP  | 0.00  | 0.00  | 0.00  | NaN   |
| 1394 | CRHR1  | 0.00  | -0.13 | 0.00  | -0.19 |
| 1395 | CRHR2  | 0.00  | 0.25  | 0.00  | 0.53  |
| 1396 | CRIP1  | 0.00  | 0.00  | 0.00  | NaN   |
| 1397 | CRIP2  | 0.00  | 0.00  | 0.00  | NaN   |
| 1398 | CRK    | 0.00  | -0.13 | 0.00  | 0.05  |
| 1399 | CRKL   | 0.00  | 0.13  | 0.00  | 0.25  |
| 1400 | CRMP1  | 0.00  | -0.13 | -0.10 | 0.10  |
| 1401 | CRP    | 0.00  | 0.00  | 0.05  | -0.03 |
| 1404 | CRTL1  | 0.00  | -0.13 | 0.00  | 0.10  |
| 1406 | CRX    | 0.09  | 0.00  | 0.00  | -0.06 |
| 1407 | CRY1   | 0.00  | 0.00  | 0.00  | NaN   |
| 1408 | CRY2   | 0.00  | 0.00  | 0.00  | NaN   |
| 1409 | CRYAA  | 0.00  | 0.13  | 0.00  | 0.41  |
| 1410 | CRYAB  | 0.00  | 0.00  | 0.00  | NaN   |
| 1411 | CRYBA1 | 0.00  | 0.38  | 0.00  | 0.11  |
| 1412 | CRYBA2 | 0.00  | 0.00  | 0.00  | NaN   |
| 1413 | CRYBA4 | 0.00  | 0.13  | 0.00  | 0.26  |
| 1414 | CRYBB1 | 0.00  | 0.13  | 0.00  | 0.37  |
| 1415 | CRYBB2 | 0.00  | 0.00  | 0.00  | NaN   |
| 1417 | CRYBB3 | 0.00  | 0.00  | 0.00  | NaN   |
| 1418 | CRYGA  | 0.00  | 0.00  | 0.00  | NaN   |
| 1419 | CRYGB  | 0.00  | 0.00  | 0.00  | NaN   |
| 1420 | CRYGC  | 0.00  | 0.00  | 0.00  | NaN   |
| 1421 | CRYGD  | 0.00  | 0.00  | 0.00  | NaN   |
| 1428 | CRYM   | 0.00  | 0.00  | 0.00  | NaN   |
| 1429 | CRYZ   | 0.00  | 0.00  | 0.00  | NaN   |
| 1431 | CS     | 0.00  | 0.00  | 0.00  | NaN   |
| 1432 | MAPK14 | 0.00  | 0.00  | 0.00  | NaN   |
| 1434 | CSE1L  | 0.09  | 0.00  | 0.00  | 0.17  |
| 1435 | CSF1   | 0.09  | 0.00  | 0.05  | 0.23  |
| 1436 | CSF1R  | 0.00  | 0.00  | 0.00  | NaN   |
| 1437 | CSF2   | 0.00  | -0.13 | 0.00  | -0.15 |
| 1439 | CSF2RB | -0.09 | 0.00  | 0.00  | 0.07  |
| 1440 | CSF3   | 0.00  | 0.50  | 0.00  | 0.34  |
| 1441 | CSF3R  | 0.00  | 0.00  | 0.00  | NaN   |
| 1442 | CSH1   | 1.00  | 1.00  | 0.00  | 0.23  |
| 1444 | CSHL1  | 0.27  | 0.13  | 0.00  | 0.17  |
| 1445 | CSK    | 0.00  | 0.00  | 0.00  | NaN   |
| 1446 | CSN1   | 0.00  | 0.00  | 0.00  | NaN   |

|      |          |       |       |       |       |
|------|----------|-------|-------|-------|-------|
| 1447 | CSN2     | 0.00  | 0.00  | 0.00  | NaN   |
| 1448 | CSN10    | 0.00  | 0.00  | 0.00  | NaN   |
| 1452 | CSNK1A1  | 0.00  | 0.00  | 0.00  | NaN   |
| 1453 | CSNK1D   | 0.00  | 0.00  | 0.00  | NaN   |
| 1454 | CSNK1E   | -0.09 | 0.00  | 0.05  | 0.40  |
| 1455 | CSNK1G2  | 0.00  | 0.00  | 0.00  | NaN   |
| 1456 | CSNK1G3  | 0.00  | 0.00  | 0.00  | NaN   |
| 1457 | CSNK2A1  | 0.00  | 0.00  | 0.00  | 0.54  |
| 1459 | CSNK2A2  | -0.09 | 0.00  | 0.00  | 0.34  |
| 1460 | CSNK2B   | 0.00  | 0.00  | 0.00  | NaN   |
| 1462 | CSPG2    | 0.00  | -0.13 | 0.00  | 0.13  |
| 1463 | CSPG3    | 0.00  | 0.00  | 0.00  | NaN   |
| 1464 | CSPG4    | 0.00  | 0.00  | 0.00  | NaN   |
| 1465 | CSRP1    | 0.00  | 0.00  | 0.00  | NaN   |
| 1466 | CSRP2    | 0.00  | 0.00  | 0.00  | NaN   |
| 1468 | SLC25A10 | 0.00  | 0.00  | 0.00  | NaN   |
| 1469 | CST1     | 0.00  | 0.00  | 0.00  | NaN   |
| 1470 | CST2     | 0.00  | 0.00  | 0.00  | NaN   |
| 1471 | CST3     | 0.00  | 0.00  | 0.00  | NaN   |
| 1472 | CST4     | 0.00  | 0.00  | 0.00  | NaN   |
| 1473 | CST5     | 0.00  | 0.00  | 0.00  | NaN   |
| 1474 | CST6     | -0.09 | 0.00  | 0.05  | -0.05 |
| 1475 | CSTA     | 0.00  | 0.00  | 0.00  | NaN   |
| 1476 | CSTB     | 0.00  | 0.00  | 0.00  | NaN   |
| 1477 | CSTF1    | 0.09  | 0.50  | 0.00  | 0.55  |
| 1479 | CSTF3    | 0.00  | 0.00  | 0.05  | 0.08  |
| 1482 | CSX      | 0.00  | 0.00  | 0.00  | NaN   |
| 1486 | CTBS     | 0.00  | 0.13  | 0.05  | 0.54  |
| 1487 | CTBP1    | 0.00  | -0.13 | -0.10 | 0.64  |
| 1488 | CTBP2    | 0.00  | 0.00  | -0.05 | 0.25  |
| 1489 | CTF1     | 0.00  | 0.00  | 0.00  | NaN   |
| 1490 | CTGF     | 0.00  | 0.00  | 0.00  | NaN   |
| 1491 | CTH      | 0.00  | 0.00  | 0.00  | NaN   |
| 1493 | CTLA4    | 0.00  | 0.00  | 0.00  | NaN   |
| 1495 | CTNNA1   | 0.00  | 0.00  | -0.05 | 0.61  |
| 1496 | CTNNA2   | 0.00  | 0.00  | 0.00  | NaN   |
| 1497 | CTNS     | 0.00  | 0.00  | 0.00  | NaN   |
| 1499 | CTNNB1   | 0.00  | 0.00  | -0.05 | 0.09  |
| 1500 | CTNND1   | 0.00  | 0.00  | 0.00  | NaN   |
| 1501 | CTNND2   | 0.00  | 0.00  | 0.10  | -0.23 |
| 1503 | CTPS     | 0.00  | 0.00  | 0.00  | NaN   |
| 1504 | CTRB1    | 0.00  | 0.00  | 0.05  | 0.07  |
| 1506 | CTRL     | -0.09 | -0.13 | 0.00  | 0.32  |
| 1508 | CTSB     | -0.09 | -0.50 | -0.15 | 0.39  |
| 1509 | CTSD     | 0.00  | -0.13 | -0.05 | -0.08 |
| 1510 | CTSE     | 0.00  | 0.13  | 0.00  | -0.09 |
| 1511 | CTSG     | 0.00  | 0.00  | 0.00  | NaN   |

|      |         |       |       |       |       |
|------|---------|-------|-------|-------|-------|
| 1512 | CTSH    | 0.00  | 0.00  | 0.00  | NaN   |
| 1513 | CTSK    | 0.00  | 0.00  | 0.50  | 0.57  |
| 1514 | CTSL    | 0.00  | 0.00  | 0.00  | NaN   |
| 1515 | CTSL2   | 0.00  | 0.00  | 0.00  | NaN   |
| 1520 | CTSS    | 0.00  | 0.13  | 0.05  | 0.42  |
| 1521 | CTSW    | -0.09 | 0.00  | 0.05  | 0.08  |
| 1522 | CTSZ    | 0.18  | 0.25  | 0.00  | 0.38  |
| 1523 | CUTL1   | 0.18  | 0.00  | 0.00  | 0.20  |
| 1524 | CX3CR1  | 0.00  | 0.00  | 0.00  | 0.19  |
| 1525 | CXADR   | 0.00  | -0.13 | 0.00  | 0.17  |
| 1528 | CYB5    | -0.09 | 0.00  | -0.25 | 0.49  |
| 1534 | CYB561  | 0.27  | 0.13  | 0.00  | 0.60  |
| 1535 | CYBA    | -0.09 | -0.13 | -0.05 | -0.01 |
| 1537 | CYC1    | 0.18  | 0.00  | 0.10  | 0.27  |
| 1539 | CYLC2   | 0.00  | 0.00  | 0.00  | NaN   |
| 1540 | CYLD    | 0.00  | 0.00  | -0.05 | 0.13  |
| 1543 | CYP1A1  | 0.00  | 0.50  | 0.50  | 0.08  |
| 1544 | CYP1A2  | 0.00  | 0.00  | 0.00  | NaN   |
| 1545 | CYP1B1  | 0.00  | 0.25  | 0.00  | 0.45  |
| 1548 | CYP2A6  | 0.00  | 0.00  | 0.00  | NaN   |
| 1549 | CYP2A7  | 0.00  | 0.00  | 0.00  | NaN   |
| 1551 | CYP3A7  | 0.18  | 0.00  | 0.00  | 0.59  |
| 1553 | CYP2A13 | 0.00  | 0.00  | -0.05 | 0.07  |
| 1555 | CYP2B6  | 0.00  | 0.00  | -0.05 | 0.07  |
| 1556 | CYP2B7  | 0.00  | 0.00  | -0.05 | 0.12  |
| 1558 | CYP2C8  | 0.00  | 0.00  | 0.00  | NaN   |
| 1559 | CYP2C9  | 0.00  | 0.00  | 0.00  | NaN   |
| 1562 | CYP2C18 | 0.00  | 0.00  | 0.00  | NaN   |
| 1565 | CYP2D6  | 0.00  | 0.00  | 0.05  | 0.04  |
| 1571 | CYP2E   | 0.00  | 0.00  | -0.10 | 0.14  |
| 1572 | CYP2F1  | 0.00  | 0.00  | -0.05 | -0.02 |
| 1573 | CYP2J2  | 0.00  | 0.00  | -0.05 | 0.18  |
| 1576 | CYP3A4  | 0.18  | 0.00  | 0.00  | 0.24  |
| 1577 | CYP3A5  | 0.18  | 0.00  | 0.00  | -0.04 |
| 1579 | CYP4A11 | 0.00  | 0.00  | 0.00  | NaN   |
| 1580 | CYP4B1  | 0.00  | 0.00  | 0.00  | NaN   |
| 1581 | CYP7A1  | 0.00  | 0.00  | 0.00  | NaN   |
| 1583 | CYP11A  | 0.00  | 0.00  | 0.00  | NaN   |
| 1584 | CYP11B1 | 0.18  | 0.13  | 0.05  | -0.14 |
| 1585 | CYP11B2 | 0.18  | 0.13  | 0.05  | -0.10 |
| 1586 | CYP17   | 0.00  | -0.13 | -0.05 | -0.18 |
| 1588 | CYP19   | 0.18  | 0.00  | 0.00  | -0.07 |
| 1589 | CYP21A2 | 0.00  | 0.00  | 0.00  | NaN   |
| 1591 | CYP24   | 0.18  | 0.38  | 0.00  | 0.09  |
| 1592 | CYP26A1 | 0.00  | 0.00  | 0.00  | NaN   |
| 1593 | CYP27A1 | 0.00  | 0.00  | 0.00  | NaN   |
| 1594 | CYP27B1 | 0.00  | 0.00  | 0.00  | NaN   |

|      |         |       |       |       |       |
|------|---------|-------|-------|-------|-------|
| 1595 | CYP51   | 0.18  | 0.00  | 0.00  | 0.41  |
| 1600 | DAB1    | 0.00  | 0.00  | -0.05 | -0.07 |
| 1601 | DAB2    | 0.00  | 0.00  | 0.05  | 0.04  |
| 1602 | DACH    | 0.00  | 0.00  | -0.10 | 0.13  |
| 1603 | DAD1    | 0.00  | 0.00  | 0.00  | NaN   |
| 1604 | DAF     | 0.00  | 0.13  | 0.00  | 0.27  |
| 1605 | DAG1    | -0.09 | 0.00  | -0.05 | 0.41  |
| 1606 | DGKA    | 0.00  | 0.00  | 0.00  | NaN   |
| 1607 | DGKB    | 0.00  | 0.13  | 0.05  | -0.27 |
| 1608 | DGKG    | 0.09  | 0.00  | 0.05  | -0.18 |
| 1609 | DGKQ    | 0.00  | -0.13 | -0.05 | 0.05  |
| 1611 | DAP     | 0.00  | 0.00  | 0.10  | 0.41  |
| 1612 | DAPK1   | 0.00  | 0.00  | 0.00  | NaN   |
| 1613 | DAPK3   | 0.09  | 0.00  | 0.00  | -0.12 |
| 1615 | DARS    | 0.00  | 0.00  | -0.05 | 0.49  |
| 1616 | DAXX    | 0.09  | 0.00  | 0.00  | -0.05 |
| 1618 | DAZL    | 0.00  | 0.00  | 0.00  | NaN   |
| 1620 | DBCCR1  | 0.00  | 0.00  | 0.00  | NaN   |
| 1621 | DBH     | 0.00  | 0.00  | 0.00  | NaN   |
| 1627 | DBN1    | 0.00  | 0.13  | 0.00  | -0.13 |
| 1628 | DBP     | 0.09  | 0.00  | 0.00  | 0.17  |
| 1629 | DBT     | 0.00  | 0.00  | 0.00  | NaN   |
| 1630 | DCC     | -0.09 | -0.25 | -0.20 | -0.17 |
| 1633 | DCK     | 0.00  | 0.00  | 0.00  | NaN   |
| 1634 | DCN     | 0.00  | 0.00  | 0.00  | NaN   |
| 1635 | DCTD    | 0.00  | 0.00  | -0.05 | 0.30  |
| 1636 | ACE     | 0.27  | 0.13  | 0.00  | 0.09  |
| 1638 | DCT     | 0.00  | 0.13  | -0.05 | 0.08  |
| 1639 | DCTN1   | 0.00  | 0.00  | 0.00  | NaN   |
| 1642 | DDB1    | -0.09 | 0.00  | 0.00  | 0.20  |
| 1643 | DDB2    | 0.00  | 0.00  | 0.00  | NaN   |
| 1644 | DDC     | 0.00  | 0.00  | 0.00  | NaN   |
| 1645 | AKR1C1  | 0.00  | 0.00  | 0.05  | 0.01  |
| 1646 | AKR1C2  | 0.00  | 0.00  | 0.05  | 0.03  |
| 1647 | GADD45A | 0.00  | 0.00  | 0.00  | NaN   |
| 1649 | DDIT3   | 0.00  | 0.00  | 0.00  | NaN   |
| 1650 | DDOST   | 0.00  | 0.00  | 0.00  | 0.38  |
| 1652 | DDT     | 0.00  | 0.13  | 0.00  | 0.21  |
| 1653 | DDX1    | 0.09  | 0.00  | -0.10 | 0.57  |
| 1655 | DDX5    | 0.27  | 0.13  | 0.00  | 0.57  |
| 1656 | DDX6    | 0.00  | 0.00  | 0.00  | NaN   |
| 1657 | DMXL1   | 0.00  | 0.00  | 0.00  | NaN   |
| 1659 | DDX8    | 0.00  | 0.00  | 0.00  | 0.24  |
| 1660 | DDX9    | 0.00  | 0.00  | 0.00  | NaN   |
| 1662 | DDX10   | 0.00  | 0.00  | 0.00  | NaN   |
| 1663 | DDX11   | 0.00  | 0.00  | 0.00  | 0.03  |
| 1665 | DDX15   | 0.00  | 0.00  | 0.00  | 0.55  |

|      |          |       |       |       |       |
|------|----------|-------|-------|-------|-------|
| 1666 | DECR1    | 0.18  | 0.25  | 0.05  | 0.42  |
| 1667 | DEFA1    | -0.09 | -0.38 | -0.05 | 0.11  |
| 1669 | DEFA4    | -0.09 | -0.38 | -0.10 | -0.10 |
| 1670 | DEFA5    | -0.09 | -0.38 | -0.10 | -0.36 |
| 1671 | DEFA6    | 0.00  | 0.00  | 0.00  | 0.02  |
| 1672 | DEFB1    | -0.09 | -0.38 | -0.10 | 0.14  |
| 1673 | DEFB4    | -0.27 | -0.25 | -0.15 | 0.15  |
| 1674 | DES      | 0.00  | 0.00  | 0.00  | NaN   |
| 1675 | DF       | 0.00  | 0.00  | 0.05  | -0.13 |
| 1676 | DFFA     | 0.00  | 0.00  | 0.00  | NaN   |
| 1677 | DFFB     | 0.00  | 0.00  | 0.00  | NaN   |
| 1687 | DFNA5    | 0.00  | 0.13  | 0.00  | -0.06 |
| 1690 | COCH     | 0.00  | 0.00  | 0.00  | NaN   |
| 1716 | DGUOK    | 0.00  | 0.00  | 0.00  | NaN   |
| 1717 | DHCR7    | 0.00  | 0.00  | 0.00  | 0.38  |
| 1718 | DHCR24   | 0.00  | 0.00  | 0.00  | NaN   |
| 1719 | DHFR     | 0.00  | 0.00  | 0.00  | NaN   |
| 1723 | DHODH    | 0.00  | 0.00  | 0.05  | 0.39  |
| 1725 | DHPS     | 0.00  | 0.00  | 0.00  | NaN   |
| 1727 | DIA1     | 0.00  | 0.00  | 0.00  | NaN   |
| 1728 | NQO1     | 0.00  | -0.13 | 0.05  | 0.45  |
| 1729 | DIAPH1   | 0.00  | 0.00  | 0.00  | NaN   |
| 1733 | DIO1     | 0.00  | 0.00  | 0.00  | NaN   |
| 1734 | DIO2     | 0.00  | 0.00  | 0.00  | NaN   |
| 1735 | DIO3     | 0.00  | 0.00  | 0.00  | NaN   |
| 1737 | DLAT     | 0.00  | 0.00  | 0.00  | NaN   |
| 1738 | DLD      | 0.09  | 0.00  | 0.00  | 0.20  |
| 1739 | DLG1     | 0.18  | 0.00  | 0.00  | 0.52  |
| 1740 | DLG2     | 0.00  | 0.00  | 0.05  | 0.07  |
| 1742 | DLG4     | 0.00  | 0.00  | 0.00  | NaN   |
| 1743 | DLST     | 0.00  | 0.00  | 0.00  | NaN   |
| 1746 | DLX2     | 0.00  | 0.00  | 0.00  | NaN   |
| 1748 | DLX4     | 0.00  | 0.25  | 0.00  | 0.37  |
| 1749 | DLX5     | 0.18  | 0.00  | 0.00  | 0.00  |
| 1750 | DLX6     | 0.18  | 0.00  | 0.00  | -0.05 |
| 1755 | DMBT1    | 0.00  | 0.00  | -0.05 | -0.08 |
| 1757 | SARDH    | 0.00  | 0.00  | 0.00  | NaN   |
| 1758 | DMP1     | 0.00  | 0.00  | 0.00  | NaN   |
| 1759 | DNM1     | -0.09 | 0.00  | 0.00  | 0.15  |
| 1760 | DMPK     | 0.09  | 0.00  | 0.00  | 0.34  |
| 1761 | DMRT1    | 0.00  | -0.25 | -0.15 | -0.02 |
| 1762 | DMWD     | 0.09  | 0.00  | 0.00  | 0.04  |
| 1763 | DNA2L    | 0.00  | 0.00  | 0.00  | NaN   |
| 1770 | DNAH9    | 0.00  | 0.00  | 0.00  | NaN   |
| 1773 | DNASE1   | 0.00  | 0.00  | 0.00  | NaN   |
| 1775 | DNASE1L2 | 0.00  | 0.00  | 0.00  | NaN   |
| 1776 | DNASE1L3 | 0.00  | -0.13 | -0.10 | 0.24  |

|      |         |       |       |       |       |
|------|---------|-------|-------|-------|-------|
| 1777 | DNASE2  | 0.00  | 0.00  | 0.00  | NaN   |
| 1778 | DNCH1   | 0.00  | 0.00  | 0.00  | NaN   |
| 1780 | DNCI1   | 0.18  | 0.00  | 0.00  | 0.24  |
| 1781 | DNCI2   | 0.00  | 0.00  | 0.00  | NaN   |
| 1783 | DNCLI2  | -0.09 | -0.13 | 0.00  | 0.35  |
| 1785 | DNM2    | 0.00  | -0.13 | -0.05 | -0.14 |
| 1786 | DNMT1   | 0.00  | 0.00  | 0.05  | 0.40  |
| 1787 | DNMT2   | 0.00  | 0.00  | 0.05  | 0.47  |
| 1788 | DNMT3A  | 0.09  | 0.00  | 0.00  | 0.38  |
| 1789 | DNMT3B  | 0.00  | 0.00  | 0.00  | NaN   |
| 1791 | DNTT    | 0.00  | 0.00  | -0.05 | 0.08  |
| 1793 | DOCK1   | 0.00  | 0.00  | -0.05 | 0.28  |
| 1794 | DOCK2   | 0.00  | 0.00  | 0.00  | NaN   |
| 1795 | DOCK3   | -0.09 | 0.00  | -0.05 | -0.04 |
| 1797 | DOM3Z   | 0.00  | 0.00  | 0.00  | NaN   |
| 1798 | DPAGT1  | 0.50  | 0.00  | 0.50  | 0.36  |
| 1800 | DPEP1   | 0.00  | 0.00  | 0.50  | -0.03 |
| 1801 | DPH2L1  | 0.00  | -0.13 | 0.00  | -0.02 |
| 1802 | DPH2L2  | 0.00  | 0.00  | 0.00  | NaN   |
| 1803 | DPP4    | 0.00  | 0.00  | -0.05 | 0.10  |
| 1804 | DPP6    | 0.00  | 0.00  | 0.00  | NaN   |
| 1805 | DPT     | 0.00  | 0.00  | 0.00  | NaN   |
| 1806 | DPYD    | 0.09  | 0.00  | 0.05  | 0.23  |
| 1807 | DPYS    | 0.18  | 0.00  | 0.05  | 0.01  |
| 1808 | DPYSL2  | -0.09 | -0.25 | -0.05 | 0.15  |
| 1809 | DPYSL3  | 0.00  | 0.00  | 0.00  | NaN   |
| 1810 | DR1     | 0.09  | 0.00  | 0.05  | 0.44  |
| 1811 | SLC26A3 | 0.09  | 0.00  | 0.00  | -0.16 |
| 1812 | DRD1    | 0.00  | 0.00  | 0.00  | NaN   |
| 1813 | DRD2    | 0.00  | 0.00  | 0.00  | NaN   |
| 1814 | DRD3    | 0.00  | 0.00  | 0.00  | NaN   |
| 1815 | DRD4    | -0.18 | -0.13 | 0.00  | 0.28  |
| 1819 | DRG2    | 0.00  | 0.00  | 0.00  | NaN   |
| 1820 | DRIL1   | 0.00  | 0.00  | 0.00  | NaN   |
| 1822 | DRPLA   | 0.00  | 0.00  | 0.00  | 0.47  |
| 1823 | DSC1    | 0.00  | 0.00  | -0.05 | 0.05  |
| 1824 | DSC2    | 0.00  | 0.00  | 1.00  | 0.47  |
| 1826 | DSCAM   | 0.00  | 0.00  | 0.00  | NaN   |
| 1827 | DSCR1   | 0.00  | 0.00  | 0.00  | NaN   |
| 1828 | DSG1    | 0.00  | 0.00  | -0.10 | 0.54  |
| 1830 | DSG3    | 0.00  | 0.00  | -0.10 | 0.24  |
| 1832 | DSP     | 0.00  | 0.00  | 0.00  | NaN   |
| 1833 | DSPG3   | 0.00  | 0.00  | 0.00  | NaN   |
| 1836 | SLC26A2 | 0.00  | 0.00  | 0.00  | NaN   |
| 1837 | DTNA    | 0.00  | 0.00  | -0.20 | 0.18  |
| 1838 | DTNB    | 0.09  | 0.00  | 0.00  | 0.73  |
| 1839 | DTR     | 0.00  | 0.00  | 0.00  | NaN   |

|      |        |       |       |       |       |
|------|--------|-------|-------|-------|-------|
| 1841 | DTYMK  | 0.00  | 0.00  | -0.05 | 0.38  |
| 1842 | ECM2   | 0.00  | 0.00  | 0.00  | NaN   |
| 1843 | DUSP1  | 0.00  | 0.00  | 0.00  | NaN   |
| 1844 | DUSP2  | 0.00  | 0.00  | 0.00  | NaN   |
| 1845 | DUSP3  | 0.00  | -0.13 | 0.00  | 0.29  |
| 1846 | DUSP4  | -0.09 | -0.25 | -0.05 | -0.02 |
| 1847 | DUSP5  | 0.00  | 0.00  | -0.05 | -0.20 |
| 1848 | DUSP6  | 0.09  | 0.00  | 0.00  | 0.56  |
| 1849 | DUSP7  | -0.09 | 0.00  | -0.10 | -0.20 |
| 1850 | DUSP8  | -0.09 | -0.13 | -0.05 | -0.03 |
| 1854 | DUT    | 0.00  | 0.00  | 0.00  | NaN   |
| 1855 | DVL1   | 0.00  | 0.00  | 0.00  | NaN   |
| 1856 | DVL2   | 0.00  | 0.00  | 0.00  | NaN   |
| 1857 | DVL3   | 0.09  | 0.00  | 0.00  | 0.29  |
| 1859 | DYRK1A | 0.00  | 0.00  | 0.00  | NaN   |
| 1861 | DYT1   | 0.00  | 0.00  | 0.00  | NaN   |
| 1869 | E2F1   | 0.00  | 0.00  | 0.00  | 0.36  |
| 1870 | E2F2   | -0.09 | 0.00  | 0.00  | 0.02  |
| 1871 | E2F3   | 0.00  | 0.00  | 0.00  | NaN   |
| 1874 | E2F4   | -0.09 | 0.00  | 0.00  | -0.05 |
| 1875 | E2F5   | 0.00  | 0.00  | 0.00  | NaN   |
| 1876 | E2F6   | 0.00  | 0.00  | 0.00  | NaN   |
| 1877 | E4F1   | 0.00  | 0.00  | 0.00  | NaN   |
| 1880 | EBI2   | -0.09 | -0.13 | -0.05 | 0.05  |
| 1889 | ECE1   | -0.09 | 0.00  | -0.05 | 0.13  |
| 1890 | ECGF1  | 0.00  | -0.25 | 0.00  | -0.09 |
| 1891 | ECH1   | 0.00  | 0.00  | 0.00  | NaN   |
| 1892 | ECHS1  | 0.00  | 0.00  | -0.10 | 0.44  |
| 1893 | ECM1   | 0.00  | 0.13  | 0.05  | -0.20 |
| 1901 | EDG1   | 0.09  | 0.00  | 0.00  | 0.12  |
| 1902 | EDG2   | 0.00  | 0.00  | 0.00  | 0.22  |
| 1906 | EDN1   | 0.00  | 0.00  | 0.05  | 0.25  |
| 1907 | EDN2   | 0.00  | 0.00  | 0.00  | NaN   |
| 1908 | EDN3   | 0.18  | 0.25  | 0.00  | 0.13  |
| 1909 | EDNRA  | 0.00  | 0.00  | 0.00  | 0.18  |
| 1910 | EDNRB  | -0.09 | 0.00  | -0.10 | 0.11  |
| 1911 | EDR1   | -0.09 | 0.00  | 0.00  | 0.32  |
| 1912 | EDR2   | 0.00  | 0.00  | 0.00  | NaN   |
| 1915 | EEF1A1 | 0.00  | 0.00  | 0.05  | 0.21  |
| 1917 | EEF1A2 | 0.09  | 0.00  | 0.00  | -0.14 |
| 1933 | EEF1B2 | 0.00  | 0.00  | 0.00  | NaN   |
| 1936 | EEF1D  | 0.18  | 0.00  | 0.10  | 0.18  |
| 1937 | EEF1G  | 0.00  | 0.00  | 0.00  | NaN   |
| 1938 | EEF2   | 0.00  | 0.00  | 0.00  | NaN   |
| 1939 | LGTN   | 0.00  | 0.13  | 0.00  | 0.37  |
| 1942 | EFNA1  | 0.27  | 0.13  | 0.00  | 0.39  |
| 1943 | EFNA2  | 0.00  | 0.00  | 0.00  | NaN   |

|      |          |       |       |       |       |
|------|----------|-------|-------|-------|-------|
| 1944 | EFNA3    | 0.09  | 0.13  | 0.00  | 0.06  |
| 1945 | EFNA4    | 0.09  | 0.13  | 0.00  | 0.29  |
| 1946 | EFNA5    | 0.00  | 0.00  | 0.00  | NaN   |
| 1948 | EFNB2    | -0.09 | -0.13 | 0.00  | 0.33  |
| 1949 | EFNB3    | 0.00  | 0.00  | 0.05  | 0.17  |
| 1950 | EGF      | 0.00  | 0.00  | 0.00  | NaN   |
| 1951 | CELSR3   | -0.09 | 0.00  | -0.05 | 0.22  |
| 1952 | CELSR2   | 0.09  | 0.00  | 0.05  | 0.14  |
| 1953 | EGFL3    | 0.00  | 0.00  | 0.05  | -0.01 |
| 1954 | EGFL4    | 0.09  | 0.00  | -0.05 | 0.23  |
| 1955 | EGFL5    | 0.00  | 0.00  | 0.00  | NaN   |
| 1956 | EGFR     | 0.00  | 0.00  | 0.10  | 0.74  |
| 1958 | EGR1     | 0.50  | 0.00  | 0.00  | -0.12 |
| 1959 | EGR2     | 0.00  | 0.00  | 0.00  | NaN   |
| 1960 | EGR3     | -0.09 | -0.25 | -0.15 | 0.11  |
| 1961 | EGR4     | 0.00  | 0.00  | 0.00  | NaN   |
| 1962 | EHHADH   | 0.50  | 0.00  | 0.00  | 0.23  |
| 1965 | EIF2S1   | 0.00  | 0.00  | 0.50  | 0.29  |
| 1967 | EIF2B1   | 0.00  | 0.00  | 0.00  | NaN   |
| 1969 | EPHA2    | 0.00  | 0.00  | 0.00  | NaN   |
| 1973 | EIF4A1   | 0.00  | 0.00  | 0.00  | NaN   |
| 1974 | EIF4A2   | 0.09  | 0.00  | 0.05  | 0.27  |
| 1975 | EIF4B    | 0.00  | 0.00  | 0.00  | NaN   |
| 1977 | EIF4E    | 0.00  | 0.00  | 0.00  | NaN   |
| 1978 | EIF4EBP1 | 0.55  | -0.13 | -0.05 | 0.59  |
| 1979 | EIF4EBP2 | 0.00  | 0.00  | 0.00  | NaN   |
| 1981 | EIF4G1   | 0.09  | 0.00  | 0.00  | 0.35  |
| 1982 | EIF4G2   | 0.00  | 0.00  | 0.00  | NaN   |
| 1983 | EIF5     | 0.00  | 0.00  | 0.00  | NaN   |
| 1984 | EIF5A    | 0.00  | 0.00  | 0.00  | NaN   |
| 1990 | ELA1     | 0.00  | 0.00  | 0.00  | NaN   |
| 1991 | ELA2     | 0.00  | 0.00  | 0.05  | -0.15 |
| 1992 | SERPINB1 | 0.00  | 0.00  | -0.10 | 0.11  |
| 1993 | ELAVL2   | 0.00  | -0.25 | -0.10 | 0.32  |
| 1994 | ELAVL1   | 0.00  | 0.00  | 0.00  | NaN   |
| 1995 | ELAVL3   | 0.00  | 0.00  | 0.00  | NaN   |
| 1996 | ELAVL4   | 0.00  | 0.00  | 0.00  | NaN   |
| 1997 | ELF1     | 0.00  | 0.00  | -0.05 | 0.23  |
| 1998 | ELF2     | 0.00  | 0.00  | 0.00  | NaN   |
| 1999 | ELF3     | 0.18  | 0.00  | 0.00  | 0.03  |
| 2001 | ELF5     | 0.00  | 0.13  | 0.05  | -0.10 |
| 2004 | ELK3     | 0.00  | 0.13  | 0.00  | -0.06 |
| 2005 | ELK4     | 0.00  | 0.13  | 0.00  | -0.05 |
| 2006 | ELN      | -0.09 | 0.00  | 0.00  | -0.12 |
| 2009 | EML1     | 0.00  | 0.00  | 0.00  | NaN   |
| 2011 | EMK1     | 0.00  | 0.00  | 0.00  | NaN   |
| 2012 | EMP1     | -0.09 | 0.00  | 0.00  | 0.23  |



|      |         |       |       |       |       |
|------|---------|-------|-------|-------|-------|
| 2013 | EMP2    | 0.00  | 0.00  | 0.00  | NaN   |
| 2014 | EMP3    | 0.09  | 0.00  | 0.00  | -0.12 |
| 2015 | EMR1    | 0.00  | 0.00  | 0.00  | NaN   |
| 2016 | EMX1    | 0.00  | 0.00  | 0.00  | NaN   |
| 2017 | EMS1    | 0.45  | 0.25  | 0.00  | 0.87  |
| 2018 | EMX2    | 0.00  | 0.00  | -0.05 | -0.09 |
| 2019 | EN1     | 0.00  | 0.00  | 0.00  | NaN   |
| 2020 | EN2     | 0.00  | 0.00  | 0.00  | NaN   |
| 2021 | ENDOG   | 0.00  | 0.00  | 0.00  | NaN   |
| 2022 | ENG     | -0.09 | 0.00  | -0.05 | 0.07  |
| 2023 | ENO1    | 0.00  | 0.00  | 0.00  | NaN   |
| 2026 | ENO2    | -0.09 | 0.00  | 0.00  | 0.14  |
| 2027 | ENO3    | 0.00  | 0.00  | 0.00  | NaN   |
| 2028 | ENPEP   | 0.00  | 0.00  | 0.00  | NaN   |
| 2029 | ENSA    | 0.00  | 0.13  | 0.05  | 0.23  |
| 2030 | SLC29A1 | 0.00  | 0.00  | 0.00  | NaN   |
| 2033 | EP300   | 0.00  | 0.00  | 0.05  | 0.16  |
| 2034 | EPAS1   | 0.00  | 0.50  | 0.00  | -0.17 |
| 2035 | EPB41   | 0.00  | 0.00  | 0.00  | NaN   |
| 2037 | EPB41L2 | 0.00  | 0.00  | 0.00  | NaN   |
| 2038 | EPB42   | 0.00  | 0.00  | 0.00  | NaN   |
| 2039 | EPB49   | -0.09 | -0.25 | -0.10 | 0.19  |
| 2040 | EPB72   | 0.00  | 0.00  | -0.10 | 0.21  |
| 2041 | EPHA1   | 0.00  | 0.00  | -0.05 | 0.24  |
| 2042 | EPHA3   | -0.09 | 0.00  | 0.10  | 0.40  |
| 2043 | EPHA4   | 0.00  | 0.00  | 0.00  | NaN   |
| 2044 | EPHA5   | 0.00  | 0.00  | 0.00  | NaN   |
| 2045 | EPHA7   | -0.09 | 0.00  | 0.05  | 0.15  |
| 2047 | EPHB1   | 0.00  | 0.00  | 0.00  | NaN   |
| 2048 | EPHB2   | -0.09 | 0.00  | 0.00  | 0.10  |
| 2049 | EPHB3   | 0.09  | 0.00  | 0.00  | 0.15  |
| 2050 | EPHB4   | 0.18  | 0.00  | 0.00  | 0.29  |
| 2051 | EPHB6   | 0.00  | 0.00  | -0.05 | 0.16  |
| 2052 | EPHX1   | 0.09  | 0.00  | 0.00  | -0.05 |
| 2053 | EPHX2   | -0.09 | -0.25 | -0.10 | 0.17  |
| 2054 | EPIM    | 0.00  | 0.00  | 0.00  | NaN   |
| 2055 | CLN8    | -0.09 | -0.25 | -0.15 | 0.25  |
| 2056 | EPO     | 0.18  | 0.00  | 0.00  | -0.12 |
| 2057 | EPOR    | 0.00  | 0.00  | 0.00  | NaN   |
| 2058 | EPRS    | 0.50  | 0.00  | 0.50  | 0.32  |
| 2059 | EPS8    | 0.00  | 0.00  | 0.00  | NaN   |
| 2060 | EPS15   | 0.00  | 0.00  | 0.05  | -0.38 |
| 2063 | NR2F6   | -0.09 | 0.00  | 0.00  | 0.46  |
| 2064 | ERBB2   | 0.00  | 1.00  | 0.05  | 0.87  |
| 2065 | ERBB3   | 0.00  | 0.00  | 0.00  | NaN   |
| 2066 | ERBB4   | 0.00  | 0.00  | 0.00  | NaN   |
| 2067 | ERCC1   | 0.09  | 0.00  | 0.00  | 0.33  |

|      |       |       |       |       |       |
|------|-------|-------|-------|-------|-------|
| 2068 | ERCC2 | 0.09  | 0.00  | 0.00  | -0.10 |
| 2069 | EREG  | 0.00  | 0.00  | 0.00  | NaN   |
| 2070 | EYA4  | 0.00  | 0.00  | 0.00  | NaN   |
| 2071 | ERCC3 | 0.00  | 0.00  | -0.05 | 0.44  |
| 2072 | ERCC4 | 0.00  | 0.00  | 0.50  | 0.19  |
| 2073 | ERCC5 | -0.09 | -0.13 | 0.05  | 0.51  |
| 2074 | ERCC6 | 0.00  | 0.00  | 0.00  | NaN   |
| 2077 | ERF   | 0.00  | 0.00  | -0.05 | 0.26  |
| 2078 | ERG   | 0.00  | 0.00  | 0.00  | NaN   |
| 2079 | ERH   | 0.00  | 0.00  | 0.00  | NaN   |
| 2081 | ERN1  | 0.27  | 0.13  | 0.00  | 0.27  |
| 2098 | ESD   | 0.00  | 0.00  | 0.00  | NaN   |
| 2099 | ESR1  | 0.00  | 0.00  | 0.00  | NaN   |
| 2100 | ESR2  | 0.00  | 0.00  | 0.00  | NaN   |
| 2101 | ESRRA | 0.00  | 0.00  | 0.00  | NaN   |
| 2103 | ESRRB | 0.00  | 0.00  | 0.00  | NaN   |
| 2104 | ESRRG | 0.09  | 0.00  | 0.00  | 0.09  |
| 2107 | ETF1  | 0.00  | 0.00  | 0.00  | NaN   |
| 2108 | ETFA  | 0.00  | 0.00  | 0.00  | NaN   |
| 2109 | ETFB  | 0.09  | 0.13  | -0.05 | 0.40  |
| 2110 | ETFDH | 0.00  | 0.00  | 0.00  | 0.43  |
| 2113 | ETS1  | 0.00  | 0.00  | -0.10 | -0.06 |
| 2114 | ETS2  | 0.00  | 0.00  | 0.00  | NaN   |
| 2115 | ETV1  | 0.00  | 0.13  | 0.05  | 0.36  |
| 2116 | ETV2  | 0.00  | 0.00  | 0.00  | NaN   |
| 2117 | ETV3  | 0.00  | 0.00  | 0.00  | NaN   |
| 2119 | ETV5  | 0.09  | 0.00  | 0.05  | -0.09 |
| 2120 | ETV6  | 0.00  | 0.13  | 0.10  | 0.09  |
| 2121 | EVC   | 0.00  | -0.13 | -0.10 | 0.11  |
| 2122 | EVI1  | 0.50  | 0.00  | 0.00  | -0.05 |
| 2123 | EVI2A | 0.00  | 0.00  | 0.00  | NaN   |
| 2124 | EVI2B | 0.00  | 0.00  | 0.00  | NaN   |
| 2125 | EVPL  | 0.00  | 0.13  | 0.00  | 0.15  |
| 2128 | EVX1  | 0.00  | 0.13  | 0.00  | 0.39  |
| 2130 | EWSR1 | -0.09 | 0.00  | 0.00  | 0.33  |
| 2131 | EXT1  | 0.00  | 0.38  | 0.10  | 0.37  |
| 2132 | EXT2  | 0.00  | 0.00  | 0.00  | NaN   |
| 2134 | EXTL1 | 0.00  | 0.00  | 0.00  | NaN   |
| 2135 | EXTL2 | 0.09  | 0.00  | 0.00  | 0.30  |
| 2137 | EXTL3 | -0.09 | -0.25 | -0.05 | 0.37  |
| 2138 | EYA1  | 0.00  | 0.00  | 0.00  | NaN   |
| 2139 | EYA2  | 0.00  | 0.00  | 0.00  | NaN   |
| 2140 | EYA3  | 0.00  | 0.00  | 0.00  | NaN   |
| 2145 | EZH1  | 0.00  | -0.13 | 0.00  | 0.12  |
| 2146 | EZH2  | 0.00  | 0.00  | -0.05 | 0.15  |
| 2147 | F2    | 0.00  | 0.00  | 0.00  | NaN   |
| 2149 | F2R   | 0.00  | 0.00  | 0.00  | NaN   |

|      |        |       |       |       |       |
|------|--------|-------|-------|-------|-------|
| 2150 | F2RL1  | 0.00  | 0.00  | 0.00  | NaN   |
| 2151 | F2RL2  | 0.00  | 0.00  | 0.00  | NaN   |
| 2152 | F3     | 0.00  | 0.00  | 0.00  | NaN   |
| 2153 | F5     | 0.00  | 0.00  | 0.00  | NaN   |
| 2155 | F7     | -0.09 | -0.13 | -0.05 | 0.08  |
| 2159 | F10    | -0.09 | -0.13 | -0.05 | 0.04  |
| 2160 | F11    | 0.00  | 0.00  | 0.00  | -0.05 |
| 2161 | F12    | 0.00  | 0.13  | 0.00  | 0.24  |
| 2162 | F13A1  | 0.00  | 0.00  | 0.00  | NaN   |
| 2165 | F13B   | 0.00  | 0.13  | 0.00  | 0.06  |
| 2166 | FAAH   | 0.00  | 0.00  | 0.00  | NaN   |
| 2167 | FABP4  | 0.00  | 0.13  | 0.05  | 0.06  |
| 2168 | FABP1  | 0.00  | 0.00  | -0.05 | 0.18  |
| 2169 | FABP2  | 0.00  | 0.00  | 0.00  | NaN   |
| 2170 | FABP3  | 0.00  | 0.00  | 0.00  | NaN   |
| 2171 | FABP5  | 0.00  | 0.00  | 0.05  | 0.16  |
| 2172 | FABP6  | 0.00  | 0.00  | 0.00  | NaN   |
| 2173 | FABP7  | 0.00  | 0.00  | 0.00  | NaN   |
| 2175 | FANCA  | 0.00  | 0.00  | 0.00  | 0.40  |
| 2176 | FANCC  | 0.00  | 0.00  | 0.00  | NaN   |
| 2178 | FANCE  | 0.00  | 0.00  | 0.00  | NaN   |
| 2180 | FACL2  | 0.00  | 0.00  | -0.05 | 0.18  |
| 2181 | FACL3  | 0.00  | 0.00  | 0.00  | NaN   |
| 2185 | PTK2B  | -0.09 | -0.25 | -0.10 | 0.32  |
| 2186 | FALZ   | 0.18  | 0.38  | 0.00  | 0.73  |
| 2188 | FANCF  | 0.00  | 0.00  | 0.00  | NaN   |
| 2189 | FANCG  | -0.09 | 0.13  | 0.10  | 0.63  |
| 2192 | FBLN1  | 0.00  | 0.00  | 0.00  | NaN   |
| 2193 | FARSL  | 0.00  | 0.00  | 0.00  | NaN   |
| 2195 | FAT    | 0.00  | 0.00  | 0.00  | 0.34  |
| 2196 | FAT2   | 0.00  | 0.00  | 0.00  | NaN   |
| 2197 | FAU    | -0.09 | 0.00  | 0.00  | 0.36  |
| 2199 | FBLN2  | 0.00  | 0.00  | -0.05 | 0.13  |
| 2200 | FBN1   | 0.00  | 0.00  | 0.00  | NaN   |
| 2201 | FBN2   | 0.00  | 0.00  | 0.00  | NaN   |
| 2202 | EFEMP1 | 0.00  | 0.00  | 0.00  | NaN   |
| 2203 | FBP1   | 0.00  | 0.00  | 0.00  | NaN   |
| 2204 | FCAR   | 0.09  | 0.00  | 0.00  | 0.30  |
| 2205 | FCER1A | 0.00  | 0.00  | 0.00  | NaN   |
| 2207 | FCER1G | 0.00  | 0.00  | 0.00  | NaN   |
| 2208 | FCER2  | 0.00  | 0.00  | 0.00  | NaN   |
| 2209 | FCGR1A | 0.00  | 0.00  | 0.10  | 0.02  |
| 2212 | FCGR2A | 0.00  | 0.00  | 0.00  | NaN   |
| 2213 | FCGR2B | 0.09  | 0.00  | 0.00  | 0.01  |
| 2214 | FCGR3A | 0.00  | 0.00  | 0.05  | -0.10 |
| 2215 | FCGR3B | 0.09  | 0.00  | 0.00  | -0.09 |
| 2217 | FCGRT  | 0.00  | 0.00  | 0.00  | NaN   |

|      |        |       |       |       |       |
|------|--------|-------|-------|-------|-------|
| 2218 | FCMD   | 0.00  | 0.00  | 0.00  | NaN   |
| 2219 | FCN1   | 0.00  | 0.00  | 0.00  | NaN   |
| 2220 | FCN2   | 0.00  | 0.00  | 0.00  | NaN   |
| 2222 | FDFT1  | -0.09 | -0.50 | -0.15 | 0.59  |
| 2224 | FDPS   | 0.09  | 0.13  | 0.00  | 0.31  |
| 2230 | FDX1   | -0.09 | 0.00  | 0.00  | 0.39  |
| 2232 | FDXR   | 0.00  | 0.13  | 0.00  | 0.31  |
| 2235 | FECH   | -0.09 | 0.00  | -0.20 | 0.47  |
| 2237 | FEN1   | -0.09 | 0.00  | 0.00  | 0.19  |
| 2241 | FER    | 0.00  | 0.00  | 0.00  | NaN   |
| 2242 | FES    | 0.00  | 0.00  | 0.00  | NaN   |
| 2243 | FGA    | 0.00  | 0.00  | 0.00  | 0.20  |
| 2244 | FGB    | 0.00  | 0.00  | 0.00  | 0.01  |
| 2247 | FGF2   | 0.00  | 0.00  | 0.00  | NaN   |
| 2248 | FGF3   | 0.55  | 0.25  | 0.00  | 0.09  |
| 2250 | FGF5   | 0.00  | 0.00  | 0.00  | NaN   |
| 2251 | FGF6   | -0.09 | 0.00  | 0.05  | 0.04  |
| 2252 | FGF7   | 0.00  | 0.00  | 0.00  | NaN   |
| 2253 | FGF8   | 0.00  | -0.13 | -0.05 | 0.17  |
| 2254 | FGF9   | 0.00  | 0.00  | -0.10 | -0.18 |
| 2259 | FGF14  | -0.09 | -0.13 | 0.05  | 0.25  |
| 2260 | FGFR1  | 0.50  | 0.00  | 0.50  | 0.56  |
| 2261 | FGFR3  | 0.00  | -0.13 | -0.20 | 0.04  |
| 2262 | GPC5   | 0.00  | 0.13  | -0.05 | 0.05  |
| 2263 | FGFR2  | 0.09  | 0.00  | -0.05 | 0.66  |
| 2264 | FGFR4  | 0.00  | 0.13  | 0.00  | 0.09  |
| 2266 | FGG    | 0.00  | 0.00  | 0.00  | 0.04  |
| 2267 | FGL1   | 0.00  | -0.13 | -0.05 | 0.01  |
| 2268 | FGR    | -0.09 | 0.00  | 0.00  | 0.23  |
| 2271 | FH     | 0.00  | 0.00  | 0.00  | NaN   |
| 2272 | FHIT   | 0.00  | 0.00  | -0.10 | 0.20  |
| 2274 | FHL2   | 0.00  | 0.00  | 0.00  | NaN   |
| 2275 | FHL3   | 0.00  | 0.00  | 0.00  | NaN   |
| 2280 | FKBP1A | 0.00  | 0.00  | 0.00  | NaN   |
| 2281 | FKBP1B | 0.09  | 0.00  | -0.05 | 0.04  |
| 2286 | FKBP2  | 0.00  | 0.00  | 0.00  | NaN   |
| 2287 | FKBP3  | 0.00  | 0.00  | 0.00  | NaN   |
| 2288 | FKBP4  | 0.00  | 0.00  | 0.05  | 0.19  |
| 2289 | FKBP5  | 0.00  | 0.00  | 0.00  | NaN   |
| 2290 | FOXG1B | 0.00  | 0.00  | 0.00  | NaN   |
| 2294 | FOXF1  | -0.09 | -0.13 | -0.05 | 0.12  |
| 2295 | FOXF2  | 0.00  | -0.13 | -0.10 | 0.13  |
| 2297 | FOXD1  | 0.00  | 0.00  | 0.00  | NaN   |
| 2299 | FOXI1  | 0.00  | 0.00  | 0.00  | NaN   |
| 2301 | FOX E3 | 0.00  | 0.00  | 0.00  | NaN   |
| 2302 | FOXJ1  | 0.00  | 0.13  | 0.00  | -0.08 |
| 2303 | FOXC2  | -0.09 | -0.13 | -0.05 | -0.23 |

|      |        |       |       |       |       |
|------|--------|-------|-------|-------|-------|
| 2304 | FOXE1  | 0.50  | 0.00  | 0.50  | 0.08  |
| 2305 | FOXM1  | 0.00  | 0.00  | 0.50  | 0.21  |
| 2306 | FOXD2  | 0.00  | 0.00  | 0.00  | NaN   |
| 2308 | FOXO1A | 0.00  | 0.00  | -0.05 | 0.13  |
| 2309 | FOXO3A | 0.00  | 0.00  | 0.10  | 0.27  |
| 2313 | FLI1   | -0.09 | 0.00  | -0.10 | 0.25  |
| 2314 | FLII   | 0.00  | 0.00  | 0.00  | NaN   |
| 2315 | MLANA  | -0.09 | -0.13 | -0.05 | 0.06  |
| 2317 | FLNB   | 0.50  | 0.00  | 0.00  | 0.38  |
| 2318 | FLNC   | 0.00  | 0.25  | 0.00  | 0.04  |
| 2319 | FLOT2  | 0.00  | 0.38  | 0.00  | 0.59  |
| 2322 | FLT3   | 0.00  | 0.00  | -0.05 | 0.08  |
| 2323 | FLT3LG | 0.00  | 0.00  | 0.00  | NaN   |
| 2324 | FLT4   | 0.00  | 0.13  | 0.00  | -0.18 |
| 2326 | FMO1   | 0.00  | 0.00  | 0.00  | NaN   |
| 2327 | FMO2   | 0.00  | 0.00  | 0.00  | NaN   |
| 2328 | FMO3   | 0.00  | 0.00  | 0.00  | NaN   |
| 2329 | FMO4   | 0.00  | 0.00  | 0.00  | NaN   |
| 2330 | FMO5   | 0.00  | 0.00  | 0.05  | 0.01  |
| 2331 | FMOD   | 0.00  | 0.13  | 0.00  | -0.11 |
| 2335 | FN1    | 0.00  | 0.00  | 0.00  | NaN   |
| 2339 | FNTA   | -0.09 | 0.00  | -0.05 | 0.60  |
| 2342 | FNTB   | 0.00  | 0.00  | 0.00  | NaN   |
| 2346 | FOLH1  | 0.00  | 0.00  | 0.00  | NaN   |
| 2348 | FOLR1  | 0.00  | 0.00  | 0.00  | NaN   |
| 2350 | FOLR2  | 0.00  | 0.00  | 0.00  | NaN   |
| 2352 | FOLR3  | 0.00  | 0.00  | 0.00  | NaN   |
| 2353 | FOS    | 0.00  | 0.00  | 0.00  | NaN   |
| 2354 | FOSB   | 0.09  | 0.00  | 0.00  | 0.09  |
| 2355 | FOSL2  | 0.00  | 0.00  | 0.00  | NaN   |
| 2356 | FPGS   | -0.09 | 0.00  | -0.05 | 0.45  |
| 2357 | FPR1   | 0.00  | 0.00  | -0.05 | 0.05  |
| 2358 | FPRL1  | 0.00  | 0.00  | -0.05 | 0.24  |
| 2359 | FPRL2  | 0.00  | 0.00  | -0.05 | -0.02 |
| 2395 | FRDA   | 0.00  | 0.00  | -0.05 | -0.13 |
| 2444 | FRK    | -0.09 | 0.00  | 0.10  | 0.17  |
| 2475 | FRAP1  | 0.00  | 0.00  | 0.00  | NaN   |
| 2483 | FRG1   | 0.00  | 0.00  | 0.05  | 0.48  |
| 2487 | FRZB   | 0.00  | 0.00  | 0.00  | NaN   |
| 2488 | FSHB   | 0.00  | 0.00  | 0.00  | NaN   |
| 2492 | FSHR   | 0.00  | 0.00  | 0.00  | NaN   |
| 2494 | NR5A2  | 0.09  | 0.00  | 0.00  | 0.34  |
| 2495 | FTH1   | -0.09 | 0.00  | 0.00  | 0.16  |
| 2512 | FTL    | 0.09  | 0.00  | 0.00  | 0.09  |
| 2515 | ADAM2  | 0.27  | -0.13 | -0.05 | 0.05  |
| 2516 | NR5A1  | 0.00  | 0.00  | 0.00  | NaN   |
| 2517 | FUCA1  | -0.09 | 0.00  | 0.00  | -0.17 |

|      |        |       |       |       |       |
|------|--------|-------|-------|-------|-------|
| 2520 | GAS    | 0.00  | 0.13  | 0.00  | -0.14 |
| 2521 | FUS    | 0.00  | 0.00  | 0.00  | NaN   |
| 2523 | FUT1   | 0.09  | 0.00  | 0.00  | 0.26  |
| 2524 | FUT2   | 0.09  | 0.00  | 0.00  | -0.02 |
| 2525 | FUT3   | 0.00  | 0.00  | 0.00  | NaN   |
| 2526 | FUT4   | -0.09 | 0.13  | -0.05 | 0.26  |
| 2527 | FUT5   | 0.00  | 0.00  | 0.00  | NaN   |
| 2528 | FUT6   | 0.00  | 0.00  | 0.00  | NaN   |
| 2529 | FUT7   | 0.00  | 0.00  | 0.00  | NaN   |
| 2530 | FUT8   | 0.00  | 0.00  | 0.00  | NaN   |
| 2531 | FVT1   | -0.09 | 0.00  | -0.15 | 0.29  |
| 2532 | FY     | 0.00  | 0.00  | 0.00  | NaN   |
| 2533 | FYB    | 0.00  | 0.00  | 0.05  | 0.51  |
| 2534 | FYN    | 0.50  | 0.00  | 0.50  | 0.42  |
| 2535 | FZD2   | 0.00  | -0.13 | 0.00  | 0.11  |
| 2537 | G1P3   | -0.09 | 0.00  | 0.00  | 0.16  |
| 2538 | G6PC   | 0.00  | 0.00  | 0.00  | 0.37  |
| 2542 | G6PT1  | 0.00  | 0.00  | 0.00  | NaN   |
| 2547 | G22P1  | 0.00  | 0.00  | 0.10  | 0.27  |
| 2548 | GAA    | 0.00  | 0.25  | 0.00  | -0.11 |
| 2549 | GAB1   | 0.00  | 0.00  | 0.05  | 0.17  |
| 2550 | GABBR1 | 0.00  | 0.00  | 0.00  | NaN   |
| 2551 | GABPA  | 0.00  | 0.00  | 0.00  | NaN   |
| 2553 | GABPB2 | 0.50  | 0.00  | 0.50  | 0.63  |
| 2554 | GABRA1 | 0.00  | 0.00  | 0.00  | NaN   |
| 2555 | GABRA2 | 0.00  | 0.00  | 0.00  | NaN   |
| 2557 | GABRA4 | 0.00  | 0.00  | 0.00  | NaN   |
| 2558 | GABRA5 | 0.00  | 0.00  | 0.00  | 0.25  |
| 2559 | GABRA6 | 0.00  | 0.00  | 0.00  | NaN   |
| 2560 | GABRB1 | 0.00  | 0.00  | 0.00  | NaN   |
| 2561 | GABRB2 | 0.00  | 0.00  | 0.00  | NaN   |
| 2562 | GABRB3 | 0.00  | -0.13 | 0.00  | 0.17  |
| 2563 | GABRD  | 0.00  | 0.00  | 0.00  | NaN   |
| 2566 | GABRG2 | 0.00  | 0.00  | 0.00  | NaN   |
| 2567 | GABRG3 | 0.00  | 0.00  | 0.00  | -0.01 |
| 2568 | GABRP  | 0.00  | 0.00  | 0.00  | NaN   |
| 2569 | GABRR1 | 0.00  | 0.00  | 0.00  | NaN   |
| 2570 | GABRR2 | 0.00  | 0.00  | 0.00  | NaN   |
| 2571 | GAD1   | 0.00  | 0.00  | 0.00  | NaN   |
| 2572 | GAD2   | -0.09 | 0.00  | 0.00  | 0.16  |
| 2580 | GAK    | 0.00  | -0.13 | -0.10 | 0.31  |
| 2581 | GALC   | 0.00  | 0.13  | 0.00  | -0.06 |
| 2582 | GALE   | -0.09 | 0.00  | 0.00  | 0.09  |
| 2583 | GALGT  | 0.00  | 0.00  | 0.00  | NaN   |
| 2584 | GALK1  | 0.18  | 0.13  | 0.00  | 0.34  |
| 2585 | GALK2  | 0.00  | 0.00  | 0.00  | NaN   |
| 2587 | GALR1  | -0.09 | 0.00  | -0.25 | -0.01 |

|      |        |       |       |       |       |
|------|--------|-------|-------|-------|-------|
| 2588 | GALNS  | -0.09 | -0.13 | -0.05 | 0.40  |
| 2589 | GALNT1 | 0.00  | 0.00  | -0.25 | 0.49  |
| 2590 | GALNT2 | 0.09  | 0.00  | 0.00  | -0.02 |
| 2591 | GALNT3 | 0.00  | 0.00  | 0.00  | NaN   |
| 2592 | GALT   | -0.09 | 0.13  | 0.10  | 0.45  |
| 2593 | GAMT   | 0.00  | 0.00  | 0.00  | NaN   |
| 2596 | GAP43  | 0.00  | 0.00  | 0.00  | NaN   |
| 2597 | GAPD   | -0.09 | 0.00  | 0.00  | 0.46  |
| 2615 | GARP   | 0.27  | 0.00  | 0.00  | 0.30  |
| 2617 | GARS   | 0.00  | 0.50  | 0.00  | 0.33  |
| 2618 | GART   | 0.00  | 0.00  | 0.00  | NaN   |
| 2619 | GAS1   | 0.00  | 0.00  | 0.00  | NaN   |
| 2620 | GAS2   | 0.00  | 0.00  | 0.00  | NaN   |
| 2621 | GAS6   | -0.09 | -0.13 | -0.05 | 0.11  |
| 2622 | GAS11  | -0.09 | -0.13 | -0.05 | -0.01 |
| 2624 | GATA2  | 0.00  | 0.00  | 0.00  | NaN   |
| 2625 | GATA3  | 0.00  | 0.00  | 0.05  | -0.01 |
| 2626 | GATA4  | -0.09 | -0.50 | -0.15 | 0.27  |
| 2627 | GATA6  | 0.00  | 0.00  | -0.05 | 0.02  |
| 2628 | GATM   | 0.00  | 0.00  | 0.00  | NaN   |
| 2629 | GBA    | 0.27  | 0.13  | 0.00  | 0.28  |
| 2631 | GBAS   | 0.00  | 0.00  | 0.10  | 0.37  |
| 2632 | GBE1   | -0.09 | 0.00  | 0.05  | 0.41  |
| 2633 | GBP1   | 0.00  | 0.00  | 0.00  | NaN   |
| 2634 | GBP2   | 0.00  | 0.00  | 0.00  | NaN   |
| 2637 | GBX2   | 0.00  | 0.00  | -0.05 | -0.01 |
| 2638 | GC     | 0.00  | 0.00  | 0.00  | NaN   |
| 2639 | GCDH   | 0.00  | 0.00  | 0.00  | NaN   |
| 2641 | GCG    | 0.00  | 0.00  | -0.05 | 0.11  |
| 2643 | GCH1   | 0.00  | 0.00  | 0.05  | 0.20  |
| 2644 | GCHFR  | 0.00  | 0.00  | 0.00  | NaN   |
| 2645 | GCK    | 0.00  | 0.00  | 0.00  | NaN   |
| 2646 | GCKR   | 0.09  | 0.13  | 0.05  | -0.07 |
| 2647 | GCN5L1 | 0.00  | 0.00  | 0.00  | NaN   |
| 2648 | GCN5L2 | 0.00  | 0.13  | 0.00  | 0.48  |
| 2649 | NR6A1  | 0.00  | 0.00  | 0.00  | NaN   |
| 2650 | GCNT1  | 0.00  | 0.00  | -0.05 | 0.11  |
| 2651 | GCNT2  | 0.00  | 0.00  | 0.05  | 0.62  |
| 2653 | GCSH   | -0.09 | 0.00  | -0.05 | 0.35  |
| 2657 | GDF1   | 0.00  | 0.00  | 0.00  | NaN   |
| 2658 | GDF2   | 0.00  | 0.00  | 0.00  | NaN   |
| 2660 | GDF8   | 0.00  | 0.00  | 0.00  | NaN   |
| 2661 | GDF9   | 0.00  | -0.13 | 0.00  | -0.11 |
| 2662 | GDF10  | 0.00  | 0.00  | 0.00  | NaN   |
| 2665 | GDI2   | 0.00  | 0.00  | 0.00  | NaN   |
| 2668 | GDNF   | 0.00  | 0.00  | 0.05  | 0.01  |
| 2669 | GEM    | 0.00  | -0.13 | 0.00  | 0.11  |

|      |         |       |       |       |       |
|------|---------|-------|-------|-------|-------|
| 2670 | GFAP    | 0.00  | -0.13 | 0.00  | 0.16  |
| 2671 | GFER    | 0.00  | 0.00  | 0.00  | NaN   |
| 2672 | GFI1    | 0.00  | 0.00  | 0.05  | -0.12 |
| 2673 | GFPT1   | 0.00  | 0.00  | 0.00  | NaN   |
| 2674 | GFRA1   | 0.00  | 0.00  | -0.05 | 0.08  |
| 2675 | GFRA2   | -0.09 | -0.38 | -0.10 | 0.00  |
| 2676 | GFRA3   | 0.00  | 0.00  | 0.00  | NaN   |
| 2677 | GGCX    | 0.00  | 0.00  | 0.00  | NaN   |
| 2678 | GGT1    | 0.00  | 0.00  | 0.00  | NaN   |
| 2679 | GGT2    | 0.00  | 0.00  | -0.10 | 0.09  |
| 2683 | B4GALT1 | -0.09 | 0.00  | 0.05  | 0.37  |
| 2687 | GGTLA1  | 0.00  | 0.00  | 0.00  | NaN   |
| 2688 | GH1     | 0.27  | 0.13  | 0.00  | 0.30  |
| 2689 | GH2     | 0.27  | 0.13  | 0.00  | 0.07  |
| 2690 | GHR     | 0.00  | 0.00  | 0.05  | -0.13 |
| 2691 | GHRH    | 0.00  | -0.13 | 0.00  | -0.04 |
| 2692 | GHRHR   | 0.00  | 0.13  | 0.00  | 0.13  |
| 2693 | GHSR    | 0.09  | 0.00  | 0.00  | 0.07  |
| 2694 | GIF     | 0.00  | 0.00  | 0.00  | NaN   |
| 2695 | GIP     | 0.00  | 0.38  | 0.00  | -0.06 |
| 2696 | GIPR    | 0.09  | 0.00  | 0.00  | -0.14 |
| 2697 | GJA1    | 0.00  | 0.00  | 0.05  | -0.09 |
| 2700 | GJA3    | 0.00  | 0.00  | -0.10 | 0.01  |
| 2701 | GJA4    | 0.00  | 0.00  | 0.00  | NaN   |
| 2702 | GJA5    | 0.00  | 0.00  | 0.05  | -0.19 |
| 2703 | GJA8    | 0.00  | 0.00  | 0.05  | -0.02 |
| 2707 | GJB3    | 0.00  | 0.00  | 0.05  | 0.19  |
| 2709 | GJB5    | 0.00  | 0.00  | 0.00  | NaN   |
| 2720 | GLB1    | 0.00  | 0.00  | 0.00  | NaN   |
| 2729 | GCLC    | 0.00  | 0.00  | 0.00  | NaN   |
| 2730 | GCLM    | 0.09  | 0.00  | 0.00  | 0.37  |
| 2731 | GLDC    | -0.09 | -0.13 | -0.10 | 0.15  |
| 2733 | GLE1L   | 0.00  | 0.13  | 0.10  | 0.12  |
| 2734 | GLG1    | 0.00  | 0.00  | 0.05  | 0.24  |
| 2735 | GLI     | 0.00  | 0.00  | 0.00  | NaN   |
| 2736 | GLI2    | 0.00  | 0.00  | 0.00  | NaN   |
| 2737 | GLI3    | 0.00  | 0.00  | 0.00  | NaN   |
| 2739 | GLO1    | 0.00  | 0.00  | 0.00  | NaN   |
| 2740 | GLP1R   | 0.00  | 0.00  | 0.00  | NaN   |
| 2741 | GLRA1   | 0.00  | 0.00  | 0.00  | NaN   |
| 2743 | GLRB    | 0.00  | 0.13  | 0.00  | 0.01  |
| 2744 | GLS     | 0.00  | 0.00  | 0.00  | NaN   |
| 2745 | GLRX    | 0.00  | 0.00  | 0.00  | NaN   |
| 2746 | GLUD1   | 0.09  | 0.00  | -0.10 | 0.55  |
| 2752 | GLUL    | 0.00  | 0.00  | 0.00  | NaN   |
| 2760 | GM2A    | 0.00  | 0.00  | 0.00  | NaN   |
| 2762 | GMDS    | 0.00  | -0.13 | -0.10 | 0.33  |



|      |        |       |       |       |       |
|------|--------|-------|-------|-------|-------|
| 2764 | GMFB   | 0.00  | 0.00  | 0.05  | 0.40  |
| 2765 | GML    | 0.18  | 0.13  | 0.05  | 0.19  |
| 2766 | GMPR   | 0.00  | 0.00  | 0.00  | NaN   |
| 2767 | GNA11  | 0.00  | 0.00  | 0.00  | NaN   |
| 2769 | GNA15  | 0.00  | 0.00  | 0.00  | NaN   |
| 2770 | GNAI1  | 0.00  | 0.00  | 0.00  | NaN   |
| 2771 | GNAI2  | -0.09 | 0.00  | -0.05 | 0.23  |
| 2773 | GNAI3  | 0.09  | 0.00  | 0.05  | 0.71  |
| 2774 | GNAL   | 0.00  | 0.00  | 0.00  | NaN   |
| 2775 | GNAO1  | 0.00  | 0.00  | 0.00  | NaN   |
| 2776 | GNAQ   | 0.00  | 0.00  | -0.10 | 0.58  |
| 2778 | GNAS   | 0.18  | 0.50  | 0.00  | 0.36  |
| 2779 | GNAT1  | -0.09 | 0.00  | -0.10 | 0.06  |
| 2780 | GNAT2  | 0.09  | 0.00  | 0.05  | 0.09  |
| 2781 | GNAZ   | 0.00  | 0.00  | 0.00  | NaN   |
| 2782 | GNB1   | 0.00  | 0.00  | 0.00  | NaN   |
| 2783 | GNB2   | 0.18  | 0.00  | 0.00  | 0.36  |
| 2784 | GNB3   | -0.09 | 0.00  | 0.00  | -0.31 |
| 2785 | GNG3   | 0.00  | 0.00  | 0.00  | NaN   |
| 2786 | GNG4   | 0.18  | 0.00  | 0.00  | 0.30  |
| 2787 | GNG5   | 0.00  | 0.00  | 0.05  | 0.22  |
| 2788 | GNG7   | 0.00  | 0.00  | 0.00  | NaN   |
| 2790 | GNG10  | 0.00  | 0.00  | 0.00  | NaN   |
| 2791 | GNG11  | 0.18  | 0.00  | 0.00  | -0.16 |
| 2792 | GNGT1  | 0.18  | 0.00  | 0.00  | 0.62  |
| 2794 | GNL1   | 0.00  | 0.00  | 0.00  | NaN   |
| 2796 | GNRH1  | -0.09 | -0.25 | -0.05 | 0.11  |
| 2797 | GNRH2  | 0.00  | 0.00  | 0.00  | NaN   |
| 2798 | GNRHR  | 0.00  | 0.00  | 0.00  | NaN   |
| 2799 | GNS    | 0.09  | 0.00  | 0.00  | 0.00  |
| 2800 | GOLGA1 | 0.00  | 0.00  | 0.00  | NaN   |
| 2801 | GOLGA2 | 0.00  | 0.00  | 0.00  | NaN   |
| 2802 | GOLGA3 | 0.00  | 0.00  | 0.00  | NaN   |
| 2803 | GOLGA4 | 0.00  | 0.00  | 0.00  | NaN   |
| 2804 | GOLGB1 | 0.00  | 0.00  | 0.00  | NaN   |
| 2805 | GOT1   | 0.00  | -0.13 | -0.05 | 0.10  |
| 2806 | GOT2   | 0.00  | 0.00  | 0.00  | NaN   |
| 2810 | SFN    | -0.09 | -0.13 | 0.00  | 0.14  |
| 2811 | GP1BA  | 0.00  | 0.00  | 0.00  | NaN   |
| 2812 | GP1BB  | 0.00  | 0.00  | 0.00  | 0.23  |
| 2813 | GP2    | 0.00  | 0.00  | 0.00  | NaN   |
| 2814 | GP5    | 0.09  | 0.00  | 0.00  | 0.06  |
| 2815 | GP9    | 0.00  | 0.00  | 0.00  | NaN   |
| 2817 | GPC1   | 0.00  | 0.00  | -0.05 | 0.12  |
| 2819 | GPD1   | 0.00  | 0.00  | 0.00  | NaN   |
| 2820 | GPD2   | 0.00  | 0.00  | -0.05 | 0.16  |
| 2821 | GPI    | 0.00  | 0.50  | 0.50  | 0.19  |

|      |        |       |       |       |       |
|------|--------|-------|-------|-------|-------|
| 2822 | GPLD1  | 0.00  | 0.00  | 0.05  | 0.06  |
| 2823 | GPM6A  | 0.00  | 0.13  | -0.10 | 0.05  |
| 2825 | GPR1   | 0.00  | 0.00  | 0.00  | NaN   |
| 2827 | GPR3   | -0.09 | 0.00  | 0.00  | -0.23 |
| 2828 | GPR4   | 0.09  | 0.00  | 0.00  | 0.34  |
| 2829 | CCXCR1 | -0.09 | 0.00  | -0.05 | 0.22  |
| 2832 | GPR8   | 0.00  | 0.00  | 0.00  | NaN   |
| 2835 | GPR12  | 0.00  | 0.00  | -0.05 | 0.09  |
| 2838 | GPR15  | 0.00  | 0.00  | 0.00  | NaN   |
| 2840 | GPR17  | 0.00  | 0.00  | -0.05 | -0.04 |
| 2841 | GPR18  | -0.09 | -0.13 | -0.05 | 0.06  |
| 2842 | GPR19  | -0.09 | 0.00  | 0.00  | 0.08  |
| 2843 | GPR20  | 0.18  | 0.00  | 0.05  | -0.11 |
| 2844 | GPR21  | 0.00  | 0.00  | 0.00  | NaN   |
| 2845 | GPR22  | 0.09  | 0.00  | 0.00  | 0.43  |
| 2847 | GPR24  | 0.00  | 0.00  | 0.05  | -0.10 |
| 2848 | GPR25  | 0.00  | 0.00  | 0.00  | NaN   |
| 2850 | GPR27  | -0.09 | 0.00  | -0.05 | 0.29  |
| 2852 | GPR30  | 0.00  | 0.00  | 0.05  | -0.05 |
| 2853 | GPR31  | 0.00  | 0.00  | 0.00  | NaN   |
| 2854 | GPR32  | 0.00  | 0.00  | 0.00  | NaN   |
| 2859 | GPR35  | 0.00  | 0.00  | -0.05 | 0.07  |
| 2861 | GPR37  | 0.00  | 0.13  | 0.00  | 0.15  |
| 2862 | GPR38  | 0.00  | 0.13  | 0.00  | -0.08 |
| 2863 | GPR39  | 0.00  | 0.00  | -0.05 | 0.08  |
| 2867 | GPR43  | 0.00  | 0.00  | 0.00  | NaN   |
| 2868 | GPRK2L | 0.00  | -0.13 | -0.15 | 0.27  |
| 2869 | GPRK5  | 0.00  | 0.00  | -0.05 | 0.16  |
| 2870 | GPRK6  | 0.00  | 0.13  | 0.00  | 0.22  |
| 2872 | GPRK7  | 0.00  | 0.00  | 0.00  | NaN   |
| 2873 | GPS1   | 0.00  | 0.00  | 0.00  | NaN   |
| 2874 | GPS2   | 0.00  | 0.00  | 0.00  | NaN   |
| 2876 | GPX1   | -0.09 | 0.00  | -0.05 | -0.04 |
| 2877 | GPX2   | 0.00  | 0.00  | 0.00  | NaN   |
| 2878 | GPX3   | 0.00  | 0.00  | 0.00  | NaN   |
| 2879 | GPX4   | 0.00  | 0.00  | 0.00  | NaN   |
| 2880 | GPX5   | 0.00  | 0.00  | 0.00  | NaN   |
| 2885 | GRB2   | 0.18  | 0.13  | 0.00  | 0.72  |
| 2886 | GRB7   | 0.00  | 1.00  | 0.05  | 0.88  |
| 2887 | GRB10  | 0.00  | 0.00  | 0.00  | NaN   |
| 2888 | GRB14  | 0.00  | 0.00  | 0.00  | NaN   |
| 2889 | GRF2   | 0.00  | 0.00  | 0.00  | NaN   |
| 2890 | GRIA1  | 0.00  | 0.00  | 0.00  | NaN   |
| 2891 | GRIA2  | 0.00  | 0.13  | 0.00  | 0.13  |
| 2893 | GRIA4  | 0.00  | 0.00  | 0.00  | NaN   |
| 2895 | GRID2  | 0.00  | 0.00  | 0.00  | NaN   |
| 2896 | GRN    | 0.09  | -0.13 | 0.00  | 0.17  |

|      |        |       |       |       |       |
|------|--------|-------|-------|-------|-------|
| 2897 | GRIK1  | 0.00  | 0.00  | 0.00  | NaN   |
| 2899 | GRIK3  | 0.00  | 0.00  | 0.00  | NaN   |
| 2900 | GRIK4  | -0.09 | 0.00  | -0.10 | -0.03 |
| 2901 | GRIK5  | 0.00  | 0.00  | -0.05 | 0.12  |
| 2902 | GRIN1  | 0.00  | 0.00  | 0.00  | NaN   |
| 2903 | GRIN2A | 0.00  | 0.00  | 0.00  | NaN   |
| 2904 | GRIN2B | -0.09 | 0.00  | 0.00  | 0.19  |
| 2905 | GRIN2C | 0.00  | 0.13  | 0.00  | 0.10  |
| 2906 | GRIN2D | 0.09  | 0.00  | 0.00  | 0.03  |
| 2908 | NR3C1  | 0.00  | 0.00  | 0.00  | NaN   |
| 2909 | GRLF1  | 0.09  | 0.00  | 0.00  | 0.64  |
| 2911 | GRM1   | 0.00  | -0.13 | 0.00  | 0.25  |
| 2912 | GRM2   | -0.09 | 0.00  | -0.10 | -0.07 |
| 2913 | GRM3   | 0.00  | 0.00  | 0.00  | NaN   |
| 2914 | GRM4   | 0.00  | 0.00  | 0.00  | NaN   |
| 2915 | GRM5   | 0.00  | 0.00  | 0.05  | 0.19  |
| 2916 | GRM6   | 0.00  | 0.00  | 0.00  | NaN   |
| 2917 | GRM7   | 0.00  | 0.00  | 0.00  | NaN   |
| 2918 | GRM8   | 0.00  | 0.25  | 0.00  | 0.25  |
| 2919 | GRO1   | 0.00  | 0.00  | 0.00  | NaN   |
| 2920 | GRO2   | 0.00  | 0.00  | 0.00  | NaN   |
| 2921 | GRO3   | 0.00  | 0.00  | 0.00  | NaN   |
| 2922 | GRP    | -0.09 | 0.00  | -0.20 | -0.05 |
| 2923 | GRP58  | 0.00  | 0.00  | 0.00  | NaN   |
| 2926 | GRSF1  | 0.00  | 0.00  | 0.00  | NaN   |
| 2928 | GSCL   | -0.09 | 0.00  | 0.00  | -0.21 |
| 2931 | GSK3A  | 0.00  | 0.00  | -0.05 | 0.40  |
| 2932 | GSK3B  | 0.00  | 0.00  | 0.00  | NaN   |
| 2934 | GSN    | 0.00  | 0.00  | -0.10 | 0.46  |
| 2935 | GSPT1  | 0.00  | 0.00  | 0.00  | NaN   |
| 2936 | GSR    | -0.09 | -0.25 | -0.05 | 0.16  |
| 2937 | GSS    | 0.00  | 0.13  | 0.00  | 0.43  |
| 2939 | GSTA2  | 0.00  | 0.00  | 0.00  | NaN   |
| 2940 | GSTA3  | 0.00  | 0.00  | 0.00  | NaN   |
| 2941 | GSTA4  | 0.00  | 0.00  | 0.00  | NaN   |
| 2944 | GSTM1  | 0.55  | 0.38  | 0.40  | 0.28  |
| 2946 | GSTM2  | 0.09  | 0.00  | 0.10  | 0.10  |
| 2947 | GSTM3  | 0.09  | 0.00  | 0.05  | -0.03 |
| 2948 | GSTM4  | 0.09  | 0.00  | 0.05  | 0.50  |
| 2949 | GSTM5  | 0.09  | 0.00  | 0.05  | 0.23  |
| 2950 | GSTP1  | 0.27  | 0.00  | 0.05  | -0.16 |
| 2952 | GSTT1  | -0.18 | -0.25 | -0.50 | 0.77  |
| 2953 | GSTT2  | 0.00  | 0.13  | 0.00  | -0.15 |
| 2954 | GSTZ1  | 0.00  | 0.00  | 0.00  | NaN   |
| 2956 | MSH6   | 0.00  | 0.00  | 0.00  | NaN   |
| 2957 | GTF2A1 | 0.00  | 0.00  | 0.00  | NaN   |
| 2958 | GTF2A2 | 0.00  | 0.00  | 0.05  | 0.06  |

|      |         |       |       |       |       |
|------|---------|-------|-------|-------|-------|
| 2960 | GTF2E1  | 0.00  | 0.00  | 0.00  | NaN   |
| 2961 | GTF2E2  | -0.09 | -0.25 | -0.05 | 0.51  |
| 2962 | GTF2F1  | 0.00  | 0.00  | 0.00  | NaN   |
| 2963 | GTF2F2  | 0.00  | 0.00  | -0.05 | -0.22 |
| 2965 | GTF2H1  | 0.00  | 0.00  | 0.00  | NaN   |
| 2967 | GTF2H3  | 0.00  | 0.00  | 0.00  | NaN   |
| 2968 | GTF2H4  | 0.00  | 0.00  | 0.00  | NaN   |
| 2969 | GTF2I   | -0.09 | 0.00  | 0.00  | 0.24  |
| 2971 | GTF3A   | 0.00  | 0.00  | -0.05 | 0.44  |
| 2974 | GUCY1B2 | 0.00  | 0.13  | 0.00  | 0.86  |
| 2975 | GTF3C1  | 0.00  | 0.00  | 0.00  | NaN   |
| 2976 | GTF3C2  | 0.09  | 0.00  | 0.05  | 0.52  |
| 2977 | GUCY1A2 | 0.00  | 0.00  | 0.00  | NaN   |
| 2979 | GUCA1B  | 0.00  | 0.00  | 0.10  | -0.07 |
| 2981 | GUCA2B  | 0.00  | 0.00  | 0.00  | NaN   |
| 2982 | GUCY1A3 | 0.00  | 0.00  | 0.00  | 0.00  |
| 2983 | GUCY1B3 | 0.00  | 0.00  | 0.00  | 0.03  |
| 2984 | GUCY2C  | 0.50  | 0.00  | 0.00  | 0.04  |
| 2987 | GUK1    | 0.09  | 0.00  | 0.00  | 0.40  |
| 2990 | GUSB    | 0.00  | 0.00  | 0.00  | NaN   |
| 2992 | GYG     | 0.00  | 0.00  | 0.05  | 0.41  |
| 2993 | GYPA    | 0.00  | 0.00  | 0.00  | NaN   |
| 2994 | GYPB    | 0.00  | 0.00  | 0.00  | NaN   |
| 2995 | GYPC    | 0.00  | 0.00  | 0.00  | NaN   |
| 2996 | GYPE    | 0.00  | 0.00  | 0.00  | NaN   |
| 2997 | GYS1    | 0.09  | 0.00  | 0.00  | 0.15  |
| 2998 | GYS2    | 0.00  | 0.00  | 0.00  | NaN   |
| 3000 | GUCY2D  | 0.00  | 0.00  | 0.00  | NaN   |
| 3001 | GZMA    | 0.00  | 0.00  | -0.05 | 0.01  |
| 3003 | GZMK    | 0.00  | 0.00  | -0.05 | -0.07 |
| 3004 | GZMM    | 0.00  | 0.00  | -0.05 | 0.05  |
| 3005 | H1F0    | -0.09 | 0.00  | 0.05  | -0.14 |
| 3006 | H1F2    | 0.00  | 0.00  | 0.05  | 0.28  |
| 3007 | H1F3    | 0.00  | 0.00  | 0.05  | -0.06 |
| 3008 | H1F4    | 0.00  | 0.00  | -0.05 | 0.02  |
| 3009 | H1F5    | 0.00  | 0.00  | 0.00  | NaN   |
| 3010 | H1FT    | 0.00  | 0.00  | -0.05 | 0.06  |
| 3012 | H2AFA   | 0.00  | 0.00  | 0.50  | 0.14  |
| 3013 | H2AFG   | 0.00  | 0.00  | 0.00  | 0.03  |
| 3014 | H2AFX   | -0.09 | 0.00  | -0.05 | 0.32  |
| 3015 | H2AFZ   | 0.00  | 0.00  | 0.00  | NaN   |
| 3017 | H2BFB   | 0.00  | 0.00  | -0.05 | 0.13  |
| 3018 | H2BFF   | 0.00  | 0.00  | 0.05  | 0.51  |
| 3024 | H1F1    | 0.00  | 0.00  | 0.05  | 0.26  |
| 3026 | HABP2   | 0.00  | 0.00  | -0.05 | -0.25 |
| 3029 | HAGH    | 0.00  | 0.00  | 0.00  | NaN   |
| 3030 | HADHA   | 0.50  | 0.00  | 0.50  | 0.71  |

|      |          |       |       |       |       |
|------|----------|-------|-------|-------|-------|
| 3032 | HADHB    | 0.09  | 0.00  | 0.05  | 0.59  |
| 3034 | HAL      | 0.00  | 0.13  | 0.00  | -0.20 |
| 3035 | HARS     | 0.00  | 0.00  | 0.00  | NaN   |
| 3036 | HAS1     | 0.00  | 0.00  | 0.00  | 0.35  |
| 3037 | HAS2     | 0.18  | 0.25  | 0.10  | -0.01 |
| 3039 | HBA1     | 0.00  | 0.00  | -0.05 | -0.05 |
| 3040 | HBA2     | 0.00  | 0.00  | -0.05 | -0.07 |
| 3043 | HBB      | 0.00  | -0.13 | 0.00  | 0.06  |
| 3045 | HBD      | 0.00  | -0.13 | 0.00  | 0.10  |
| 3046 | HBE1     | 0.00  | -0.13 | 0.00  | 0.05  |
| 3047 | HBG1     | 0.00  | -0.13 | 0.00  | 0.07  |
| 3049 | HBQ1     | 0.00  | 0.00  | -0.05 | -0.23 |
| 3050 | HBZ      | 0.00  | 0.00  | -0.05 | 0.08  |
| 3053 | SERPIND1 | -0.09 | 0.13  | 0.00  | -0.09 |
| 3055 | HCK      | 0.00  | 0.13  | 0.05  | -0.27 |
| 3059 | HCLS1    | 0.00  | 0.00  | 0.00  | NaN   |
| 3060 | HCRT     | 0.00  | 0.50  | 0.00  | -0.01 |
| 3061 | HCRTR1   | 0.00  | 0.00  | 0.00  | NaN   |
| 3062 | HCRTR2   | 0.00  | 0.00  | 0.00  | NaN   |
| 3064 | HD       | 0.00  | -0.13 | -0.15 | 0.36  |
| 3065 | HDAC1    | 0.00  | 0.00  | 0.00  | NaN   |
| 3066 | HDAC2    | -0.09 | 0.00  | 0.10  | 0.67  |
| 3067 | HDC      | 0.18  | 0.00  | 0.00  | 0.19  |
| 3068 | HDGF     | 0.00  | 0.13  | 0.00  | -0.32 |
| 3069 | HDLBP    | 0.00  | 0.00  | -0.05 | 0.40  |
| 3071 | HEM1     | 0.00  | 0.00  | 0.00  | NaN   |
| 3073 | HEXA     | 0.00  | 0.00  | 0.00  | NaN   |
| 3074 | HEXB     | 0.00  | 0.00  | 0.00  | NaN   |
| 3077 | HFE      | 0.50  | 0.50  | 0.50  | 0.14  |
| 3080 | HFL3     | 0.00  | 0.13  | 0.00  | -0.18 |
| 3081 | HGD      | 0.00  | 0.00  | 0.00  | NaN   |
| 3082 | HGF      | 0.09  | 0.00  | 0.00  | 0.04  |
| 3083 | HGFAC    | 0.00  | -0.13 | -0.15 | 0.05  |
| 3084 | NRG1     | 0.50  | 0.00  | 0.50  | 0.21  |
| 3087 | HHEX     | 0.00  | 0.00  | 0.00  | NaN   |
| 3090 | HIC1     | 0.00  | -0.13 | 0.00  | 0.14  |
| 3091 | HIF1A    | 0.00  | 0.00  | 0.00  | NaN   |
| 3092 | HIP1     | -0.09 | 0.00  | 0.00  | 0.18  |
| 3093 | HIP2     | 0.00  | 0.13  | 0.00  | 0.33  |
| 3094 | HINT1    | 0.00  | -0.13 | 0.00  | 0.30  |
| 3096 | HIVEP1   | 0.00  | 0.00  | 0.05  | 0.28  |
| 3098 | HK1      | 0.00  | 0.00  | 0.00  | NaN   |
| 3099 | HK2      | 0.00  | 0.00  | 0.00  | NaN   |
| 3101 | HK3      | 0.00  | 0.13  | 0.00  | 0.09  |
| 3104 | HKR3     | 0.00  | 0.00  | 0.00  | NaN   |
| 3105 | HLA-A    | 0.00  | 0.00  | 0.00  | NaN   |
| 3106 | HLA-B    | 0.00  | 0.00  | 0.00  | NaN   |

|      |          |       |       |       |       |
|------|----------|-------|-------|-------|-------|
| 3109 | HLA-DMB  | 0.09  | 0.00  | 0.00  | -0.04 |
| 3110 | HLXB9    | 0.00  | 0.00  | -0.05 | 0.00  |
| 3111 | HLA-DOA  | 0.09  | 0.00  | 0.00  | 0.09  |
| 3112 | HLA-DOB  | 0.09  | 0.00  | 0.00  | -0.13 |
| 3113 | HLA-DPA1 | 0.09  | 0.00  | 0.00  | 0.07  |
| 3115 | HLA-DPB1 | 0.09  | 0.00  | 0.00  | -0.03 |
| 3117 | HLA-DQA1 | 0.00  | 0.00  | -0.05 | 0.14  |
| 3119 | HLA-DQB1 | 0.55  | 0.25  | 0.15  | 0.24  |
| 3122 | HLA-DRA  | 0.00  | 0.00  | 0.00  | NaN   |
| 3123 | HLA-DRB1 | 0.27  | 0.00  | 0.15  | 0.13  |
| 3127 | HLA-DRB5 | 0.09  | 0.13  | 0.10  | 0.14  |
| 3134 | HLA-F    | 0.00  | 0.00  | 0.00  | NaN   |
| 3135 | HLA-G    | 0.00  | 0.00  | 0.00  | NaN   |
| 3140 | HLALS    | 0.00  | 0.00  | 0.00  | NaN   |
| 3141 | HLCS     | 0.00  | 0.00  | 0.00  | NaN   |
| 3145 | HMBS     | -0.09 | 0.00  | -0.05 | 0.42  |
| 3146 | HMG1     | 0.00  | 0.00  | 0.00  | 0.38  |
| 3148 | HMG2     | 0.00  | 0.00  | -0.05 | 0.38  |
| 3150 | HMG14    | 0.00  | 0.00  | 0.00  | NaN   |
| 3155 | HMGCL    | -0.09 | 0.00  | 0.00  | 0.07  |
| 3156 | HMGCR    | 0.00  | 0.00  | 0.00  | NaN   |
| 3157 | HMGCS1   | 0.00  | 0.00  | 0.05  | 0.08  |
| 3158 | HMGCS2   | 0.18  | 0.13  | 0.05  | -0.10 |
| 3159 | HMGY     | 0.00  | 0.00  | 0.00  | NaN   |
| 3161 | HMMR     | 0.00  | 0.00  | 0.00  | NaN   |
| 3162 | HMOX1    | 0.00  | 0.00  | 0.00  | NaN   |
| 3163 | HMOX2    | 0.00  | 0.00  | 0.00  | NaN   |
| 3164 | NR4A1    | 0.00  | 0.00  | 0.00  | NaN   |
| 3169 | HNF3A    | 0.18  | 0.00  | 0.00  | 0.20  |
| 3170 | HNF3B    | 0.00  | 0.00  | 0.00  | NaN   |
| 3172 | HNF4A    | 0.09  | 0.00  | 0.00  | 0.30  |
| 3174 | HNF4G    | 0.00  | 0.25  | 0.00  | -0.01 |
| 3175 | ONECUT1  | 0.09  | 0.00  | 0.00  | 0.03  |
| 3176 | HNMT     | 0.00  | 0.00  | 0.00  | NaN   |
| 3177 | SLC29A2  | 0.00  | 0.00  | 0.05  | -0.29 |
| 3178 | HNRPA1   | 0.00  | 0.00  | 0.00  | NaN   |
| 3181 | HNRPA2B1 | 0.00  | 0.13  | 0.00  | -0.33 |
| 3182 | HNRPAB   | 0.00  | 0.00  | 0.00  | NaN   |
| 3183 | HNRPC    | 0.00  | 0.00  | 0.00  | NaN   |
| 3184 | HNRPD    | 0.00  | 0.00  | 0.00  | NaN   |
| 3185 | HNRPF    | 0.00  | 0.00  | 0.00  | NaN   |
| 3187 | HNRPH1   | 0.00  | 0.00  | 0.05  | 0.40  |
| 3189 | HNRPH3   | 0.00  | 0.00  | 0.00  | NaN   |
| 3190 | HNRPK    | 0.00  | 0.00  | 0.00  | NaN   |
| 3191 | HNRPL    | 0.00  | 0.00  | 0.00  | NaN   |
| 3192 | HNRPU    | 0.09  | 0.13  | 0.00  | -0.01 |
| 3195 | HOX11    | 0.00  | -0.13 | -0.05 | -0.15 |

|      |         |       |       |       |       |
|------|---------|-------|-------|-------|-------|
| 3198 | HOXA1   | 0.00  | 0.13  | 0.00  | -0.08 |
| 3199 | HOXA2   | 0.00  | 0.13  | 0.00  | -0.17 |
| 3200 | HOXA3   | 0.00  | 0.13  | 0.00  | 0.47  |
| 3201 | HOXA4   | 0.00  | 0.13  | 0.00  | 0.07  |
| 3202 | HOXA5   | 0.00  | 0.13  | 0.00  | -0.16 |
| 3203 | HOXA6   | 0.00  | 0.13  | 0.00  | 0.48  |
| 3204 | HOXA7   | 0.00  | 0.13  | 0.00  | 0.23  |
| 3205 | HOXA9   | 0.00  | 0.13  | 0.00  | -0.03 |
| 3206 | HOXA10  | 0.00  | 0.13  | 0.00  | -0.05 |
| 3207 | HOXA11  | 0.00  | 0.13  | 0.00  | 0.41  |
| 3211 | HOXB1   | 0.00  | 0.38  | 0.00  | 0.09  |
| 3212 | HOXB2   | 0.00  | 0.38  | 0.00  | 0.34  |
| 3213 | HOXB3   | 0.00  | 0.38  | 0.00  | 0.22  |
| 3215 | HOXB5   | 0.00  | 0.38  | 0.00  | 0.37  |
| 3216 | HOXB6   | 0.00  | 0.38  | 0.00  | 0.40  |
| 3217 | HOXB7   | 0.00  | 0.38  | 0.00  | 0.48  |
| 3218 | HOXB8   | 0.00  | 0.38  | 0.00  | -0.19 |
| 3221 | HOXC4   | 0.00  | 0.00  | 0.00  | NaN   |
| 3222 | HOXC5   | 0.00  | 0.00  | 0.00  | NaN   |
| 3223 | HOXC6   | 0.55  | 0.38  | 0.25  | 0.03  |
| 3224 | HOXC8   | 0.09  | 0.00  | 0.00  | -0.08 |
| 3226 | HOXC10  | 0.09  | 0.00  | 0.00  | 0.15  |
| 3227 | HOXC11  | 0.00  | 0.00  | 0.00  | NaN   |
| 3229 | HOXC13  | 0.00  | 0.00  | 0.00  | NaN   |
| 3231 | HOXD1   | 0.00  | 0.00  | 0.00  | NaN   |
| 3232 | HOXD3   | 0.00  | 0.00  | 0.00  | NaN   |
| 3233 | HOXD4   | 0.00  | 0.00  | 0.00  | NaN   |
| 3235 | HOXD9   | 0.00  | 0.00  | 0.00  | NaN   |
| 3236 | HOXD10  | 0.00  | 0.00  | 0.00  | NaN   |
| 3237 | HOXD11  | 0.00  | 0.00  | 0.00  | NaN   |
| 3238 | HOXD12  | 0.00  | 0.00  | 0.00  | NaN   |
| 3239 | HOXD13  | 0.00  | 0.00  | 0.00  | NaN   |
| 3240 | HP      | 0.00  | 0.00  | 0.05  | -0.18 |
| 3241 | HPCAL1  | 0.00  | 0.00  | -0.05 | 0.32  |
| 3242 | HPD     | 0.00  | -0.13 | 0.00  | -0.11 |
| 3248 | HPGD    | 0.00  | 0.00  | -0.05 | 0.07  |
| 3249 | HPN     | 0.00  | 0.00  | 0.00  | NaN   |
| 3250 | HPR     | 0.00  | 0.00  | 0.05  | -0.01 |
| 3257 | HPS1    | 0.00  | 0.00  | -0.05 | 0.15  |
| 3263 | HPX     | 0.00  | -0.13 | 0.00  | -0.02 |
| 3265 | HRAS    | -0.27 | -0.13 | -0.05 | 0.25  |
| 3267 | HRB     | 0.00  | 0.00  | 0.00  | NaN   |
| 3270 | HRC     | 0.09  | 0.00  | 0.00  | -0.03 |
| 3275 | HRMT1L1 | 0.00  | 0.00  | 0.00  | NaN   |
| 3276 | HRMT1L2 | 0.00  | 0.00  | 0.00  | NaN   |
| 3280 | HRY     | 0.18  | 0.00  | 0.00  | 0.35  |
| 3281 | HSBP1   | -0.09 | 0.00  | -0.05 | 0.49  |

|      |         |       |       |       |       |
|------|---------|-------|-------|-------|-------|
| 3283 | HSD3B1  | 0.09  | 0.00  | 0.05  | 0.64  |
| 3284 | HSD3B2  | 0.09  | 0.00  | 0.05  | 0.00  |
| 3290 | HSD11B1 | 0.00  | 0.00  | 0.00  | NaN   |
| 3291 | HSD11B2 | -0.09 | 0.00  | 0.05  | 0.02  |
| 3292 | HSD17B1 | 0.00  | -0.13 | 0.00  | 0.00  |
| 3293 | HSD17B3 | 0.00  | 0.00  | 0.00  | NaN   |
| 3294 | HSD17B2 | -0.09 | 0.00  | -0.05 | 0.15  |
| 3295 | HSD17B4 | 0.00  | 0.00  | 0.00  | NaN   |
| 3297 | HSF1    | 0.18  | 0.00  | 0.10  | 0.33  |
| 3298 | HSF2    | 0.00  | 0.00  | 0.05  | 0.73  |
| 3299 | HSF4    | -0.09 | 0.00  | 0.00  | -0.26 |
| 3300 | DNAJB2  | 0.00  | 0.00  | 0.00  | NaN   |
| 3301 | DNAJA1  | -0.09 | 0.00  | 0.05  | 0.33  |
| 3303 | HSPA1A  | 0.00  | 0.50  | 0.50  | 0.18  |
| 3305 | HSPA1L  | 0.00  | 0.00  | 0.00  | NaN   |
| 3306 | HSPA2   | 0.09  | 0.00  | 0.00  | -0.10 |
| 3308 | HSPA4   | 0.00  | -0.13 | 0.00  | 0.29  |
| 3309 | HSPA5   | 0.00  | 0.00  | 0.00  | NaN   |
| 3310 | HSPA6   | 0.00  | 0.00  | 0.00  | NaN   |
| 3312 | HSPA8   | 0.00  | 0.00  | -0.05 | 0.11  |
| 3313 | HSPA9B  | 0.00  | 0.00  | 0.00  | NaN   |
| 3315 | HSPB1   | -0.09 | 0.00  | 0.00  | 0.39  |
| 3316 | HSPB2   | 0.00  | 0.00  | 0.00  | NaN   |
| 3320 | HSPCA   | 0.00  | -0.13 | 0.00  | 0.51  |
| 3321 | IGSF3   | 0.09  | 0.00  | 0.10  | 0.14  |
| 3326 | HSPCB   | 0.00  | 0.00  | 0.00  | NaN   |
| 3329 | HSPD1   | 0.00  | 0.00  | 0.00  | NaN   |
| 3336 | HSPE1   | 0.00  | 0.00  | 0.00  | NaN   |
| 3337 | DNAJB1  | 0.00  | 0.00  | 0.00  | NaN   |
| 3338 | DNAJC4  | 0.00  | 0.00  | 0.00  | NaN   |
| 3339 | HSPG2   | -0.09 | 0.00  | 0.00  | -0.14 |
| 3340 | NDST1   | 0.00  | 0.00  | 0.00  | NaN   |
| 3344 | HTLF    | 0.00  | 0.00  | 0.00  | NaN   |
| 3346 | HTN1    | 0.00  | 0.00  | 0.00  | NaN   |
| 3347 | HTN3    | 0.00  | 0.00  | 0.00  | NaN   |
| 3350 | HTR1A   | 0.00  | 0.00  | 0.00  | NaN   |
| 3351 | HTR1B   | 0.00  | 0.00  | 0.00  | NaN   |
| 3352 | HTR1D   | -0.09 | 0.00  | 0.00  | 0.06  |
| 3354 | HTR1E   | 0.00  | 0.00  | 0.00  | NaN   |
| 3355 | HTR1F   | -0.09 | 0.00  | 0.05  | 0.15  |
| 3356 | HTR2A   | 0.09  | 0.00  | 0.00  | -0.08 |
| 3357 | HTR2B   | 0.00  | 0.00  | 0.00  | NaN   |
| 3359 | HTR3A   | 0.00  | 0.00  | 0.00  | NaN   |
| 3360 | HTR4    | 0.00  | 0.00  | 0.00  | NaN   |
| 3361 | HTR5A   | 0.00  | 0.00  | 0.00  | NaN   |
| 3363 | HTR7    | 0.09  | 0.00  | 0.00  | 0.10  |
| 3364 | HUS1    | 0.00  | 0.13  | 0.00  | -0.01 |



|      |        |       |       |       |       |
|------|--------|-------|-------|-------|-------|
| 3371 | HXB    | 0.00  | 0.00  | 0.00  | NaN   |
| 3373 | HYAL1  | 0.00  | 0.00  | 0.00  | -0.04 |
| 3375 | IAPP   | 0.00  | 0.00  | 0.00  | NaN   |
| 3376 | IARS   | 0.00  | 0.00  | 0.00  | NaN   |
| 3381 | IBSP   | 0.00  | 0.00  | 0.00  | NaN   |
| 3382 | ICA1   | 0.00  | 0.00  | 0.05  | 0.05  |
| 3383 | ICAM1  | 0.00  | 0.00  | 0.05  | 0.44  |
| 3384 | ICAM2  | 0.27  | 0.13  | 0.00  | 0.03  |
| 3385 | ICAM3  | 0.00  | 0.00  | 0.05  | 0.36  |
| 3386 | ICAM4  | 0.00  | 0.00  | 0.05  | -0.22 |
| 3394 | ICSBP1 | -0.09 | -0.13 | -0.05 | -0.05 |
| 3396 | ICT1   | 0.00  | 0.13  | 0.00  | 0.30  |
| 3397 | ID1    | 0.00  | 0.00  | 0.05  | 0.34  |
| 3398 | ID2    | 0.00  | 0.00  | -0.05 | 0.14  |
| 3399 | ID3    | -0.09 | 0.00  | 0.00  | 0.11  |
| 3400 | ID4    | 0.00  | 0.00  | 0.05  | 0.20  |
| 3416 | IDE    | 0.00  | 0.00  | 0.00  | NaN   |
| 3417 | IDH1   | 0.00  | 0.00  | 0.00  | NaN   |
| 3418 | IDH2   | 0.00  | 0.00  | 0.00  | NaN   |
| 3419 | IDH3A  | 0.00  | 0.00  | 0.00  | NaN   |
| 3420 | IDH3B  | 0.00  | 0.00  | 0.05  | 0.41  |
| 3422 | IDI1   | 0.00  | 0.00  | 0.00  | NaN   |
| 3425 | IDUA   | 0.00  | -0.13 | -0.05 | 0.54  |
| 3426 | IF     | 0.00  | 0.00  | 0.00  | NaN   |
| 3428 | IFI16  | 0.00  | 0.00  | 0.00  | NaN   |
| 3429 | IFI27  | 0.00  | 0.00  | 0.00  | NaN   |
| 3430 | IFI35  | 0.00  | -0.13 | 0.00  | 0.17  |
| 3431 | SP110  | 0.00  | 0.00  | 0.00  | NaN   |
| 3434 | IFIT1  | 0.09  | 0.00  | 0.00  | -0.14 |
| 3437 | IFIT4  | 0.09  | 0.00  | 0.00  | -0.15 |
| 3439 | IFNA1  | 0.00  | 0.00  | 1.00  | 0.17  |
| 3440 | IFNA2  | 0.00  | -0.13 | -0.15 | 0.02  |
| 3441 | IFNA4  | 0.00  | -0.13 | -0.15 | -0.08 |
| 3442 | IFNA5  | 0.00  | -0.13 | -0.15 | 0.12  |
| 3443 | IFNA6  | 0.00  | -0.13 | -0.15 | 0.11  |
| 3444 | IFNA7  | 0.00  | -0.13 | -0.15 | 0.01  |
| 3445 | IFNA8  | 0.00  | -0.13 | -0.15 | -0.22 |
| 3446 | IFNA10 | 0.00  | -0.13 | -0.15 | -0.19 |
| 3448 | IFNA14 | 0.00  | -0.13 | -0.15 | 0.00  |
| 3449 | IFNA16 | 0.00  | -0.13 | -0.15 | -0.09 |
| 3451 | IFNA17 | 0.00  | -0.13 | -0.15 | 0.04  |
| 3452 | IFNA21 | 0.00  | -0.13 | -0.15 | -0.09 |
| 3454 | IFNAR1 | 0.00  | 0.00  | 0.00  | NaN   |
| 3455 | IFNAR2 | 0.00  | 0.00  | 0.00  | NaN   |
| 3456 | IFNB1  | 0.00  | -0.25 | -0.15 | -0.09 |
| 3458 | IFNG   | 0.09  | 0.00  | -0.05 | -0.32 |
| 3459 | IFNGR1 | 0.00  | 0.00  | 0.00  | NaN   |

|      |         |       |       |       |       |
|------|---------|-------|-------|-------|-------|
| 3460 | IFNGR2  | 0.00  | 0.00  | 0.00  | NaN   |
| 3467 | IFNW1   | 0.00  | -0.13 | -0.15 | -0.13 |
| 3475 | IFRD1   | 0.09  | 0.00  | 0.00  | 0.21  |
| 3479 | IGF1    | 0.00  | 0.00  | 0.00  | NaN   |
| 3480 | IGF1R   | 0.00  | 0.00  | 0.00  | NaN   |
| 3481 | IGF2    | 0.00  | -0.13 | 0.00  | -0.06 |
| 3482 | IGF2R   | 0.00  | 0.00  | 0.00  | NaN   |
| 3483 | IGFALS  | 0.00  | 0.00  | 0.00  | NaN   |
| 3484 | IGFBP1  | 0.00  | 0.00  | 0.00  | NaN   |
| 3485 | IGFBP2  | 0.00  | 0.00  | 0.00  | NaN   |
| 3486 | IGFBP3  | 0.00  | 0.00  | 0.00  | NaN   |
| 3487 | IGFBP4  | 0.00  | 0.38  | 0.00  | -0.06 |
| 3488 | IGFBP5  | 0.00  | 0.00  | 0.00  | NaN   |
| 3489 | IGFBP6  | 0.09  | 0.00  | 0.00  | 0.03  |
| 3490 | IGFBP7  | 0.00  | 0.00  | 0.05  | 0.22  |
| 3491 | CYR61   | 0.00  | 0.00  | 0.10  | 0.49  |
| 3508 | IGHMBP2 | 0.45  | 0.00  | 0.00  | 0.56  |
| 3543 | IGLL1   | 0.00  | 0.00  | 0.05  | -0.12 |
| 3549 | IHH     | 0.00  | 0.00  | 0.00  | NaN   |
| 3550 | IK      | 0.00  | 0.00  | 0.00  | NaN   |
| 3551 | IKBKB   | 0.36  | -0.13 | -0.05 | 0.50  |
| 3552 | IL1A    | 0.00  | 0.00  | 0.00  | NaN   |
| 3553 | IL1B    | 0.00  | 0.00  | 0.00  | NaN   |
| 3554 | IL1R1   | 0.00  | 0.00  | 0.00  | NaN   |
| 3556 | IL1RAP  | 0.00  | 0.00  | 0.05  | 0.56  |
| 3557 | IL1RN   | 0.00  | 0.00  | 0.00  | NaN   |
| 3558 | IL2     | 0.00  | 0.00  | 0.00  | NaN   |
| 3559 | IL2RA   | 0.00  | 0.00  | 0.00  | NaN   |
| 3560 | IL2RB   | 0.00  | 0.00  | 0.00  | NaN   |
| 3562 | IL3     | 0.00  | -0.13 | 0.00  | -0.51 |
| 3565 | IL4     | 0.00  | -0.13 | 0.00  | -0.10 |
| 3566 | IL4R    | 0.00  | 0.00  | 0.00  | NaN   |
| 3567 | IL5     | 0.00  | -0.13 | 0.00  | 0.05  |
| 3568 | IL5RA   | 0.00  | -0.13 | 0.00  | 0.15  |
| 3569 | IL6     | 0.00  | 0.13  | 0.00  | -0.06 |
| 3570 | IL6R    | 0.09  | 0.13  | 0.00  | 0.21  |
| 3572 | IL6ST   | 0.00  | 0.00  | 0.00  | NaN   |
| 3574 | IL7     | 0.00  | 0.25  | 0.05  | 0.08  |
| 3575 | IL7R    | 0.00  | 0.00  | 0.10  | 0.25  |
| 3576 | IL8     | 0.00  | 0.00  | 0.00  | NaN   |
| 3577 | IL8RA   | 0.00  | 0.00  | 0.00  | NaN   |
| 3578 | IL9     | 0.00  | -0.13 | 0.00  | 0.08  |
| 3579 | IL8RB   | 0.00  | 0.00  | 0.00  | NaN   |
| 3586 | IL10    | 0.00  | 0.13  | 0.00  | -0.09 |
| 3587 | IL10RA  | -0.09 | 0.00  | 0.00  | 0.10  |
| 3588 | IL10RB  | 0.00  | 0.00  | 0.00  | NaN   |
| 3589 | IL11    | 0.09  | 0.00  | 0.00  | 0.01  |

|      |         |       |       |       |       |
|------|---------|-------|-------|-------|-------|
| 3590 | IL11RA  | -0.09 | 0.13  | 0.10  | 0.29  |
| 3592 | IL12A   | 0.00  | 0.00  | 0.00  | NaN   |
| 3593 | IL12B   | 0.00  | 0.00  | 0.00  | NaN   |
| 3594 | IL12RB1 | 0.00  | 0.00  | 0.00  | NaN   |
| 3595 | IL12RB2 | 0.00  | 0.00  | 0.00  | NaN   |
| 3596 | IL13    | 0.00  | -0.13 | 0.00  | -0.25 |
| 3600 | IL15    | 0.00  | 0.00  | 0.00  | NaN   |
| 3601 | IL15RA  | 0.00  | 0.00  | 0.00  | NaN   |
| 3603 | IL16    | 0.00  | 0.00  | 0.00  | NaN   |
| 3604 | TNFRSF9 | 0.00  | 0.00  | 0.00  | NaN   |
| 3605 | IL17    | 0.00  | 0.00  | 0.00  | NaN   |
| 3606 | IL18    | 0.00  | 0.00  | 0.00  | NaN   |
| 3607 | ILF1    | 0.00  | 0.00  | 0.00  | NaN   |
| 3608 | ILF2    | 0.09  | 0.13  | 0.00  | 0.16  |
| 3609 | ILF3    | 0.00  | 0.50  | 0.50  | 0.39  |
| 3611 | ILK     | 0.00  | -0.13 | 0.00  | 0.36  |
| 3612 | IMPA1   | 0.00  | 0.00  | 0.05  | 0.38  |
| 3613 | IMPA2   | 0.00  | 0.00  | 0.00  | NaN   |
| 3614 | IMPDH1  | 0.00  | 0.25  | 0.00  | 0.60  |
| 3615 | IMPDH2  | -0.09 | 0.00  | -0.05 | 0.41  |
| 3617 | IMPG1   | 0.00  | 0.00  | 0.05  | -0.01 |
| 3619 | INCENP  | -0.09 | 0.00  | 0.00  | 0.28  |
| 3620 | INDO    | 0.36  | -0.13 | -0.05 | -0.02 |
| 3621 | ING1    | -0.09 | -0.13 | 0.00  | 0.29  |
| 3622 | ING1L   | 0.00  | 0.00  | -0.05 | 0.38  |
| 3623 | INHA    | 0.00  | 0.00  | 0.00  | NaN   |
| 3624 | INHBA   | 0.00  | 0.00  | 0.00  | NaN   |
| 3625 | INHBB   | 0.00  | 0.00  | 0.00  | NaN   |
| 3627 | SCYB10  | 0.00  | 0.00  | 0.00  | NaN   |
| 3628 | INPP1   | 0.00  | 0.00  | 0.00  | NaN   |
| 3630 | INS     | 0.00  | -0.13 | 0.00  | -0.05 |
| 3631 | INPP4A  | 0.00  | 0.00  | 0.00  | NaN   |
| 3632 | INPP5A  | 0.00  | 0.00  | -0.05 | 0.41  |
| 3633 | INPP5B  | 0.00  | 0.00  | 0.00  | NaN   |
| 3635 | INPP5D  | 0.00  | 0.00  | 0.00  | NaN   |
| 3636 | INPPL1  | 0.00  | 0.00  | 0.00  | NaN   |
| 3638 | INSIG1  | 0.00  | 0.00  | 0.05  | 0.18  |
| 3640 | INSL3   | 0.00  | 0.00  | 0.00  | NaN   |
| 3641 | INSL4   | -0.09 | -0.13 | -0.05 | 0.36  |
| 3642 | INSM1   | 0.00  | 0.00  | 0.00  | NaN   |
| 3643 | INSR    | 0.00  | 0.00  | 0.00  | NaN   |
| 3645 | INSRR   | 0.00  | 0.00  | 0.00  | NaN   |
| 3646 | EIF3S6  | 0.18  | -0.13 | 0.00  | 0.58  |
| 3651 | IPF1    | 0.00  | 0.00  | -0.05 | 0.13  |
| 3652 | IPP     | 0.00  | 0.00  | 0.00  | NaN   |
| 3653 | IPW     | 0.00  | 0.00  | 0.00  | NaN   |
| 3655 | ITGA6   | 0.00  | 0.00  | 0.00  | NaN   |

|      |         |       |       |       |       |
|------|---------|-------|-------|-------|-------|
| 3658 | IREB2   | 0.00  | 0.00  | 0.00  | NaN   |
| 3659 | IRF1    | 0.00  | -0.13 | 0.00  | 0.11  |
| 3660 | IRF2    | 0.00  | 0.00  | -0.05 | 0.10  |
| 3661 | IRF3    | 0.00  | 0.00  | 0.00  | NaN   |
| 3662 | IRF4    | 0.00  | 0.00  | 0.00  | 0.02  |
| 3663 | IRF5    | 0.00  | 0.25  | 0.00  | 0.17  |
| 3665 | IRF7    | -0.27 | -0.13 | -0.05 | 0.24  |
| 3667 | IRS1    | 0.00  | 0.00  | 0.00  | NaN   |
| 3669 | ISG20   | 0.00  | 0.00  | -0.05 | 0.16  |
| 3670 | ISL1    | 0.00  | 0.00  | 0.00  | NaN   |
| 3671 | ISLR    | 0.00  | 0.00  | 0.00  | NaN   |
| 3673 | ITGA2   | 0.00  | 0.00  | -0.05 | 0.03  |
| 3674 | ITGA2B  | 0.00  | -0.13 | 0.00  | 0.04  |
| 3675 | ITGA3   | 0.00  | 0.25  | 0.00  | 0.25  |
| 3676 | ITGA4   | 0.00  | 0.00  | 0.00  | NaN   |
| 3678 | ITGA5   | 0.00  | 0.00  | 0.00  | NaN   |
| 3679 | ITGA7   | 0.00  | 0.00  | 0.00  | NaN   |
| 3680 | ITGA9   | 0.00  | 0.00  | 0.00  | NaN   |
| 3682 | ITGAE   | 0.00  | 0.00  | 0.00  | NaN   |
| 3684 | ITGAM   | 0.00  | 0.00  | 0.00  | NaN   |
| 3685 | ITGAV   | 0.00  | 0.00  | 0.00  | NaN   |
| 3687 | ITGAX   | 0.00  | 0.00  | 0.00  | NaN   |
| 3688 | ITGB1   | 0.00  | -0.13 | 0.05  | 0.38  |
| 3689 | ITGB2   | 0.00  | 0.00  | 0.00  | NaN   |
| 3690 | ITGB3   | 0.00  | -0.13 | 0.00  | 0.40  |
| 3691 | ITGB4   | 0.18  | 0.13  | 0.00  | 0.19  |
| 3692 | ITGB4BP | 0.00  | 0.50  | 0.00  | 0.28  |
| 3693 | ITGB5   | 0.00  | 0.00  | 0.00  | NaN   |
| 3694 | ITGB6   | 0.00  | 0.00  | -0.10 | 0.03  |
| 3695 | ITGB7   | 0.00  | 0.00  | 0.00  | NaN   |
| 3696 | ITGB8   | 0.00  | 0.13  | 0.00  | -0.01 |
| 3698 | ITIH2   | 0.00  | 0.00  | 0.00  | NaN   |
| 3699 | ITIH3   | -0.09 | 0.00  | -0.10 | 0.13  |
| 3700 | ITIH4   | -0.09 | 0.00  | -0.10 | 0.17  |
| 3702 | ITK     | 0.00  | 0.00  | 0.00  | NaN   |
| 3703 | ITM1    | -0.09 | 0.00  | -0.10 | 0.49  |
| 3704 | ITPA    | 0.00  | 0.00  | 0.00  | NaN   |
| 3705 | ITPK1   | 0.00  | 0.00  | 0.00  | NaN   |
| 3706 | ITPKA   | 0.00  | 0.00  | 0.00  | NaN   |
| 3707 | ITPKB   | 0.09  | 0.00  | 0.00  | 0.44  |
| 3708 | ITPR1   | 0.00  | 0.00  | -0.05 | 0.03  |
| 3709 | ITPR2   | 0.00  | 0.00  | 0.00  | NaN   |
| 3710 | ITPR3   | 0.00  | 0.00  | 0.00  | NaN   |
| 3712 | IVD     | 0.00  | 0.00  | 0.00  | NaN   |
| 3713 | IVL     | 0.00  | 0.00  | 0.00  | NaN   |
| 3714 | JAG2    | 0.00  | 0.00  | 0.00  | NaN   |
| 3716 | JAK1    | 0.00  | 0.00  | 0.05  | -0.17 |

|      |        |       |       |       |       |
|------|--------|-------|-------|-------|-------|
| 3717 | JAK2   | -0.09 | -0.13 | -0.10 | 0.59  |
| 3718 | JAK3   | 0.00  | 0.00  | 0.00  | NaN   |
| 3720 | JMJ    | 0.00  | 0.00  | 0.05  | 0.12  |
| 3725 | JUN    | 0.00  | 0.00  | -0.05 | 0.19  |
| 3726 | JUNB   | 0.00  | 0.00  | 0.00  | NaN   |
| 3727 | JUND   | 0.00  | 0.00  | 0.00  | NaN   |
| 3728 | JUP    | 0.00  | 0.13  | 0.00  | 0.18  |
| 3732 | KAI1   | 0.00  | 0.00  | 0.00  | NaN   |
| 3735 | KARS   | 0.00  | -0.13 | 0.05  | 0.37  |
| 3736 | KCNA1  | -0.09 | 0.00  | 0.05  | 0.06  |
| 3737 | KCNA2  | 0.09  | 0.00  | 0.00  | 0.14  |
| 3738 | KCNA3  | 0.09  | 0.00  | 0.00  | 0.11  |
| 3739 | KCNA4  | 0.00  | 0.00  | 0.00  | NaN   |
| 3741 | KCNA5  | -0.09 | 0.00  | 0.05  | -0.05 |
| 3742 | KCNA6  | -0.09 | 0.00  | 0.05  | 0.24  |
| 3744 | KCNA10 | 0.09  | 0.00  | 0.00  | -0.08 |
| 3745 | KCNB1  | 0.18  | 0.25  | 0.05  | 0.18  |
| 3746 | KCNC1  | 0.00  | 0.00  | 0.00  | NaN   |
| 3748 | KCNC3  | 0.00  | 0.00  | 0.00  | NaN   |
| 3749 | KCNC4  | 0.09  | 0.00  | 0.00  | -0.01 |
| 3751 | KCND2  | 0.00  | 0.13  | 0.00  | -0.04 |
| 3752 | KCND3  | 0.09  | 0.00  | 0.00  | 0.04  |
| 3753 | KCNE1  | 0.00  | 0.00  | 0.00  | NaN   |
| 3754 | KCNF1  | 0.00  | 0.00  | -0.05 | 0.18  |
| 3755 | KCNG1  | 0.09  | 0.13  | 0.05  | -0.02 |
| 3756 | KCNH1  | 0.00  | 0.00  | 0.00  | NaN   |
| 3757 | KCNH2  | 0.00  | 0.00  | -0.05 | 0.23  |
| 3758 | KCNJ1  | -0.09 | 0.00  | -0.10 | 0.06  |
| 3759 | KCNJ2  | 0.00  | 0.13  | 0.00  | -0.07 |
| 3760 | KCNJ3  | 0.00  | 0.00  | 0.00  | NaN   |
| 3761 | KCNJ4  | -0.09 | 0.00  | 0.05  | -0.19 |
| 3762 | KCNJ5  | 0.00  | 0.00  | 0.00  | -0.01 |
| 3763 | KCNJ6  | 0.00  | 0.00  | 0.00  | NaN   |
| 3764 | KCNJ8  | 0.00  | 0.00  | 0.00  | NaN   |
| 3765 | KCNJ9  | 0.00  | 0.00  | 0.00  | NaN   |
| 3766 | KCNJ10 | 0.00  | 0.00  | 0.00  | NaN   |
| 3768 | KCNJ12 | 0.00  | -0.13 | 0.00  | 0.05  |
| 3769 | KCNJ13 | 0.00  | 0.00  | 0.00  | NaN   |
| 3770 | KCNJ14 | 0.09  | 0.00  | 0.00  | -0.04 |
| 3772 | KCNJ15 | 0.00  | 0.00  | 0.00  | NaN   |
| 3773 | KCNJ16 | 0.00  | 0.13  | 0.00  | 0.02  |
| 3775 | KCNK1  | 0.09  | 0.00  | 0.00  | 0.26  |
| 3776 | KCNK2  | 0.09  | 0.00  | 0.00  | 0.00  |
| 3777 | KCNK3  | 0.09  | 0.00  | 0.05  | 0.01  |
| 3778 | KCNMA1 | 0.09  | 0.00  | 0.00  | -0.09 |
| 3779 | KCNMB1 | 0.00  | 0.00  | 0.00  | NaN   |
| 3780 | KCNN1  | 0.00  | 0.00  | 0.00  | NaN   |

|      |         |       |       |       |       |
|------|---------|-------|-------|-------|-------|
| 3781 | KCNN2   | 0.00  | 0.00  | 0.00  | NaN   |
| 3782 | KCNN3   | 0.09  | 0.25  | 0.00  | 0.00  |
| 3783 | KCNN4   | 0.09  | 0.00  | -0.10 | 0.31  |
| 3784 | KCNQ1   | 0.00  | -0.13 | 0.00  | -0.07 |
| 3785 | KCNQ2   | 0.09  | 0.00  | 0.00  | 0.16  |
| 3786 | KCNQ3   | 0.00  | -0.25 | 0.05  | -0.02 |
| 3787 | KCNS1   | 0.09  | 0.13  | 0.00  | 0.24  |
| 3790 | KCNS3   | 0.09  | 0.00  | -0.05 | 0.57  |
| 3791 | KDR     | 0.00  | 0.00  | 0.00  | NaN   |
| 3792 | KEL     | 0.00  | 0.00  | -0.05 | 0.13  |
| 3795 | KHK     | 0.09  | 0.00  | 0.05  | 0.47  |
| 3796 | KIF2    | 0.00  | 0.00  | 0.00  | NaN   |
| 3797 | KIF3C   | 0.09  | 0.00  | 0.05  | 0.50  |
| 3798 | KIF5A   | 0.00  | 0.00  | 0.00  | NaN   |
| 3799 | KIF5B   | -0.09 | -0.13 | 0.05  | 0.61  |
| 3800 | KIF5C   | 0.00  | 0.00  | 0.00  | NaN   |
| 3801 | KIFC3   | -0.09 | 0.00  | 0.00  | 0.01  |
| 3802 | KIR2DL1 | 0.09  | 0.13  | -0.05 | 0.01  |
| 3805 | KIR2DL4 | 0.09  | 0.00  | 0.00  | 0.25  |
| 3809 | KIR2DS4 | 0.09  | 0.00  | 0.00  | 0.07  |
| 3811 | KIR3DL1 | 0.09  | 0.00  | 0.00  | 0.10  |
| 3812 | KIR3DL2 | 0.09  | 0.00  | 0.00  | 0.16  |
| 3814 | KISS1   | 0.00  | 0.13  | 0.00  | -0.13 |
| 3815 | KIT     | 0.00  | 0.00  | 0.00  | NaN   |
| 3817 | KLK2    | 0.00  | 0.00  | 0.00  | NaN   |
| 3818 | KLKB1   | 0.00  | 0.00  | 0.00  | 0.16  |
| 3820 | KLRB1   | -0.09 | 0.00  | 0.00  | 0.12  |
| 3822 | KLRC2   | -0.09 | -0.50 | -0.05 | 0.10  |
| 3823 | KLRC3   | -0.09 | 0.00  | 0.00  | -0.06 |
| 3824 | KLRD1   | -0.09 | 0.00  | 0.00  | 0.18  |
| 3827 | KNG     | 0.09  | 0.00  | 0.05  | -0.09 |
| 3831 | KNS2    | 0.00  | 0.00  | 0.00  | NaN   |
| 3832 | KNSL1   | 0.00  | 0.00  | 0.00  | NaN   |
| 3833 | KNSL2   | 0.09  | 0.00  | 0.05  | 0.28  |
| 3834 | KNSL3   | 0.00  | 0.00  | 0.00  | NaN   |
| 3836 | KPNA1   | 0.00  | 0.00  | 0.00  | NaN   |
| 3837 | KPNB1   | 0.00  | -0.13 | 0.00  | 0.22  |
| 3838 | KPNA2   | 0.18  | 0.38  | 0.00  | 0.43  |
| 3839 | KPNA3   | 0.00  | 0.00  | 0.00  | NaN   |
| 3840 | KPNA4   | 0.00  | 0.00  | 0.00  | NaN   |
| 3841 | KPNA5   | -0.09 | 0.00  | 0.10  | 0.62  |
| 3842 | KPNB2   | 0.00  | 0.00  | 0.00  | NaN   |
| 3843 | KPNB3   | -0.09 | 0.00  | -0.10 | 0.23  |
| 3845 | KRAS2   | 0.00  | 0.00  | 0.00  | NaN   |
| 3846 | KRN1    | 0.00  | 0.00  | 0.00  | -0.05 |
| 3848 | KRT1    | 0.00  | 0.00  | 0.00  | NaN   |
| 3849 | KRT2A   | 0.00  | 0.00  | 0.00  | NaN   |

|      |         |       |       |       |       |
|------|---------|-------|-------|-------|-------|
| 3851 | KRT4    | 0.00  | 0.00  | 0.00  | NaN   |
| 3852 | KRT5    | 0.00  | 0.00  | 0.00  | NaN   |
| 3853 | KRT6A   | 0.00  | 0.00  | 0.00  | NaN   |
| 3854 | KRT6B   | 0.00  | 0.00  | 0.00  | NaN   |
| 3855 | KRT7    | 0.00  | 0.00  | 0.00  | NaN   |
| 3856 | KRT8    | 0.00  | 0.00  | -0.05 | 0.19  |
| 3857 | KRT9    | 0.00  | 0.13  | 0.00  | 0.02  |
| 3858 | KRT10   | 0.00  | 0.25  | 0.00  | 0.39  |
| 3859 | KRT12   | 0.00  | 0.25  | 0.05  | 0.12  |
| 3860 | KRT13   | 0.00  | 0.13  | 0.00  | 0.00  |
| 3861 | KRT14   | 0.00  | 0.13  | 0.00  | -0.08 |
| 3866 | KRT15   | 0.00  | 0.13  | 0.00  | 0.08  |
| 3868 | KRT16   | 0.00  | 0.13  | 0.00  | -0.07 |
| 3872 | KRT17   | 0.50  | 0.50  | 0.50  | -0.08 |
| 3875 | KRT18   | 0.00  | 0.00  | 0.00  | NaN   |
| 3880 | KRT19   | 0.00  | 0.13  | 0.05  | 0.18  |
| 3881 | KRTHA1  | 0.00  | 0.13  | 0.00  | 0.02  |
| 3882 | KRTHA2  | 0.00  | 0.13  | 0.00  | -0.03 |
| 3883 | KRTHA3A | 0.00  | 0.25  | 0.00  | 0.01  |
| 3884 | KRTHA3B | 0.00  | 0.25  | -0.05 | 0.30  |
| 3885 | KRTHA4  | 0.00  | 0.13  | 0.00  | 0.07  |
| 3886 | KRTHA5  | 0.00  | 0.13  | 0.00  | -0.01 |
| 3887 | KRTHB1  | 0.00  | 0.00  | 0.00  | NaN   |
| 3889 | KRTHB3  | 0.00  | 0.00  | 0.00  | NaN   |
| 3891 | KRTHB5  | 0.00  | 0.00  | 0.00  | NaN   |
| 3892 | KRTHB6  | 0.00  | 0.00  | 0.00  | NaN   |
| 3895 | KTN1    | 0.00  | 0.00  | 0.05  | 0.22  |
| 3898 | LAD1    | 0.00  | 0.00  | 0.00  | NaN   |
| 3899 | LAF4    | 0.00  | 0.00  | 0.00  | NaN   |
| 3902 | LAG3    | -0.09 | 0.00  | 0.00  | -0.03 |
| 3903 | LAIR1   | 0.09  | 0.00  | -0.05 | 0.02  |
| 3904 | LAIR2   | 0.09  | 0.00  | 0.00  | -0.19 |
| 3906 | LALBA   | 0.00  | 0.00  | 0.00  | NaN   |
| 3908 | LAMA2   | 0.00  | 0.00  | 0.05  | -0.02 |
| 3909 | LAMA3   | 0.00  | 0.00  | -0.15 | -0.04 |
| 3910 | LAMA4   | 0.00  | 0.00  | 0.10  | 0.25  |
| 3911 | LAMA5   | 0.09  | 0.13  | 0.00  | 0.16  |
| 3912 | LAMB1   | 0.09  | 0.00  | 0.00  | 0.00  |
| 3913 | LAMB2   | -0.09 | 0.00  | -0.05 | 0.14  |
| 3914 | LAMB3   | 0.00  | 0.00  | 0.00  | NaN   |
| 3915 | LAMC1   | 0.00  | 0.00  | 0.00  | NaN   |
| 3916 | LAMP1   | -0.09 | -0.13 | -0.05 | 0.41  |
| 3918 | LAMC2   | 0.00  | 0.00  | 0.00  | NaN   |
| 3925 | STMN1   | -0.09 | 0.00  | 0.00  | 0.13  |
| 3927 | LASP1   | 0.00  | 0.38  | 0.00  | 0.68  |
| 3930 | LBR     | 0.09  | 0.00  | 0.00  | -0.15 |
| 3931 | LCAT    | -0.09 | -0.13 | 0.00  | 0.11  |

|      |          |       |       |       |       |
|------|----------|-------|-------|-------|-------|
| 3932 | LCK      | 0.00  | 0.00  | 0.00  | NaN   |
| 3933 | LCN1     | 0.00  | 0.00  | 0.00  | NaN   |
| 3934 | LCN2     | -0.09 | 0.00  | 0.00  | 0.11  |
| 3937 | LCP2     | 0.00  | 0.00  | 0.05  | 0.12  |
| 3938 | LCT      | 0.00  | 0.00  | -0.05 | -0.04 |
| 3939 | LDHA     | 0.00  | 0.00  | 0.00  | NaN   |
| 3945 | LDHB     | 0.00  | 0.00  | 0.00  | NaN   |
| 3948 | LDHC     | 0.00  | 0.00  | 0.00  | NaN   |
| 3949 | LDLR     | 0.00  | 0.00  | 0.00  | NaN   |
| 3950 | LECT2    | 0.00  | -0.13 | 0.00  | -0.25 |
| 3952 | LEP      | 0.00  | 0.25  | 0.00  | -0.04 |
| 3953 | LEPR     | 0.00  | 0.00  | -0.05 | 0.31  |
| 3954 | LETM1    | 0.00  | -0.13 | -0.20 | 0.44  |
| 3955 | LFNG     | 0.00  | 0.13  | 0.10  | -0.19 |
| 3956 | LGALS1   | -0.09 | 0.00  | 0.05  | 0.17  |
| 3957 | LGALS2   | -0.09 | 0.00  | 0.05  | -0.03 |
| 3958 | LGALS3   | 0.00  | 0.00  | 0.05  | -0.07 |
| 3959 | LGALS3BP | 0.00  | 0.25  | 0.00  | 0.44  |
| 3960 | LGALS4   | 0.00  | 0.00  | 0.00  | NaN   |
| 3963 | LGALS7   | 0.00  | 0.00  | 0.00  | NaN   |
| 3964 | LGALS8   | 0.09  | 0.13  | 0.00  | 0.17  |
| 3965 | LGALS9   | 0.00  | 0.13  | 0.00  | 0.34  |
| 3972 | LHB      | 0.09  | 0.00  | 0.00  | -0.05 |
| 3973 | LHCGR    | 0.00  | 0.00  | 0.00  | NaN   |
| 3975 | LHX1     | 0.00  | -0.13 | 0.00  | 0.05  |
| 3976 | LIF      | 0.00  | 0.00  | 0.00  | NaN   |
| 3977 | LIFR     | 0.00  | 0.00  | 0.05  | 0.20  |
| 3978 | LIG1     | 0.09  | 0.00  | 0.00  | 0.16  |
| 3980 | LIG3     | 0.00  | -0.13 | 0.00  | 0.24  |
| 3981 | LIG4     | -0.09 | -0.13 | 0.00  | 0.19  |
| 3982 | LIM2     | 0.00  | 0.13  | -0.05 | 0.10  |
| 3983 | ABLIM    | 0.00  | 0.00  | -0.05 | 0.21  |
| 3984 | LIMK1    | -0.09 | 0.00  | 0.00  | 0.27  |
| 3985 | LIMK2    | 0.00  | 0.00  | 0.00  | NaN   |
| 3987 | LIMS1    | 0.00  | 0.00  | 0.00  | NaN   |
| 3990 | LIPC     | 1.00  | 0.00  | 0.50  | 0.09  |
| 3991 | LIPE     | 0.09  | 0.00  | -0.05 | 0.01  |
| 3992 | FADS1    | 0.00  | 0.50  | 0.00  | 0.22  |
| 3993 | LLGL2    | 0.18  | 0.13  | 0.05  | 0.38  |
| 3995 | FADS3    | -0.09 | 0.00  | 0.00  | 0.19  |
| 3996 | LLGL1    | 0.00  | 0.00  | 0.00  | NaN   |
| 3998 | LMAN1    | -0.09 | 0.00  | -0.20 | 0.27  |
| 4000 | LMNA     | 0.00  | 0.13  | 0.00  | 0.27  |
| 4001 | LMNB1    | 0.00  | 0.00  | 0.00  | NaN   |
| 4004 | LMO1     | 0.00  | 0.00  | -0.05 | 0.12  |
| 4005 | LMO2     | 0.00  | 0.00  | 0.05  | 0.58  |
| 4008 | LMO7     | -0.09 | 0.13  | -0.15 | 0.11  |



|      |           |       |       |       |       |
|------|-----------|-------|-------|-------|-------|
| 4010 | LMX1B     | 0.09  | 0.00  | -0.05 | 0.54  |
| 4012 | LNPEP     | 0.00  | 0.00  | 0.00  | NaN   |
| 4013 | LOH11CR2A | 0.00  | 0.00  | -0.10 | 0.23  |
| 4014 | LOR       | 0.00  | 0.00  | 0.00  | NaN   |
| 4015 | LOX       | 0.00  | 0.00  | 0.00  | NaN   |
| 4016 | LOXL1     | 0.00  | 0.00  | 0.00  | NaN   |
| 4017 | LOXL2     | -0.09 | -0.25 | -0.15 | 0.27  |
| 4018 | LPA       | 0.00  | 0.00  | 0.00  | NaN   |
| 4025 | LPO       | 0.09  | -0.13 | 0.00  | -0.20 |
| 4026 | LPP       | 0.00  | 0.00  | 0.05  | 0.17  |
| 4033 | LRMP      | 0.00  | 0.00  | 0.00  | NaN   |
| 4034 | LRRN1     | 0.33  | 0.00  | 0.00  | 0.39  |
| 4035 | LRP1      | 0.00  | 0.00  | 0.00  | NaN   |
| 4036 | LRP2      | 0.00  | 0.00  | 0.00  | NaN   |
| 4037 | LRP3      | 0.00  | 0.00  | 0.05  | 0.07  |
| 4038 | LRP4      | 0.00  | 0.00  | 0.00  | NaN   |
| 4040 | LRP6      | -0.09 | 0.00  | 0.10  | 0.26  |
| 4041 | LRP5      | 0.55  | 0.00  | 0.00  | 0.30  |
| 4043 | LRPAP1    | 0.00  | 0.00  | 0.00  | 0.17  |
| 4045 | LSAMP     | 0.00  | 0.00  | 0.00  | NaN   |
| 4046 | LSP1      | 0.00  | -0.13 | -0.05 | 0.11  |
| 4047 | LSS       | 0.00  | 0.00  | 0.00  | NaN   |
| 4048 | LTA4H     | 0.00  | 0.13  | 0.00  | 0.13  |
| 4049 | LTA       | 0.00  | 0.00  | 0.00  | NaN   |
| 4050 | LTB       | 0.00  | 0.00  | 0.00  | NaN   |
| 4051 | CYP4F3    | 0.00  | 0.00  | 0.00  | NaN   |
| 4052 | LTBP1     | 0.00  | 0.00  | 0.00  | NaN   |
| 4053 | LTBP2     | 0.00  | 0.00  | 0.50  | 0.05  |
| 4055 | LTBR      | -0.09 | 0.00  | 0.00  | 0.22  |
| 4056 | LTC4S     | 0.00  | 0.00  | 0.00  | NaN   |
| 4057 | LTF       | -0.09 | 0.00  | -0.05 | 0.08  |
| 4058 | LTK       | 0.00  | 0.00  | 0.00  | NaN   |
| 4060 | LUM       | 0.00  | 0.00  | 0.00  | NaN   |
| 4061 | LY6E      | 0.18  | 0.13  | 0.05  | 0.33  |
| 4062 | LY6H      | 0.27  | 0.00  | 0.05  | -0.08 |
| 4063 | LY9       | 0.00  | 0.00  | 0.00  | NaN   |
| 4064 | LY64      | 0.00  | 0.00  | 0.00  | NaN   |
| 4065 | LY75      | 0.00  | 0.00  | -0.10 | 0.06  |
| 4066 | LYL1      | 0.00  | 0.00  | 0.00  | NaN   |
| 4067 | LYN       | 0.00  | 0.00  | 0.00  | NaN   |
| 4070 | TACSTD2   | 0.00  | 0.00  | -0.05 | 0.02  |
| 4071 | TM4SF1    | 0.00  | 0.00  | 0.05  | 0.21  |
| 4072 | TACSTD1   | 0.00  | 0.00  | 0.00  | NaN   |
| 4074 | M6PR      | -0.09 | 0.00  | 0.00  | 0.31  |
| 4076 | M11S1     | 0.00  | 0.00  | 0.05  | 0.34  |
| 4077 | M17S2     | 0.00  | -0.13 | 0.00  | 0.30  |
| 4081 | MAB21L1   | 0.00  | 0.00  | 0.00  | NaN   |

|      |        |       |       |       |       |
|------|--------|-------|-------|-------|-------|
| 4082 | MARCKS | -0.09 | 0.00  | 0.10  | 0.34  |
| 4084 | MAD    | 0.00  | 0.00  | 0.00  | NaN   |
| 4085 | MAD2L1 | 0.00  | 0.00  | 0.00  | NaN   |
| 4087 | MADH2  | -0.09 | 0.00  | -0.10 | 0.63  |
| 4088 | MADH3  | 0.00  | 0.00  | 0.00  | NaN   |
| 4089 | MADH4  | -0.09 | -0.13 | -0.25 | 0.52  |
| 4090 | MADH5  | 0.00  | -0.13 | 0.00  | 0.16  |
| 4091 | MADH6  | 0.00  | 0.00  | 0.00  | NaN   |
| 4092 | MADH7  | -0.09 | -0.13 | -0.15 | 0.45  |
| 4093 | MADH9  | 0.00  | 0.00  | 0.00  | NaN   |
| 4094 | MAF    | 0.00  | 0.00  | 0.05  | 0.07  |
| 4097 | MAFG   | 0.00  | 0.00  | 0.05  | 0.08  |
| 4099 | MAG    | 0.00  | 0.00  | 0.00  | NaN   |
| 4117 | MAK    | 0.00  | 0.00  | 0.05  | 0.46  |
| 4121 | MAN1A1 | 0.00  | 0.00  | 0.05  | 0.66  |
| 4122 | MAN2A2 | 0.00  | 0.00  | 0.00  | NaN   |
| 4123 | MAN2C1 | 0.00  | 0.00  | 0.00  | NaN   |
| 4124 | MAN2A1 | 0.00  | 0.13  | 0.00  | 0.22  |
| 4125 | MAN2B1 | 0.00  | 0.00  | 0.00  | NaN   |
| 4126 | MANBA  | 0.00  | 0.00  | 0.00  | NaN   |
| 4130 | MAP1A  | 0.00  | 0.00  | 0.00  | NaN   |
| 4131 | MAP1B  | 0.00  | 0.00  | 0.00  | NaN   |
| 4133 | MAP2   | 0.00  | 0.00  | 0.00  | NaN   |
| 4134 | MAP4   | -0.09 | 0.00  | -0.05 | 0.35  |
| 4137 | MAPT   | 0.00  | -0.13 | 0.00  | -0.04 |
| 4139 | MARK1  | 0.09  | 0.00  | 0.05  | 0.43  |
| 4140 | MARK3  | 0.00  | 0.00  | 0.00  | NaN   |
| 4141 | MARS   | 0.00  | 0.00  | 0.00  | NaN   |
| 4142 | MAS1   | 0.00  | 0.00  | 0.00  | NaN   |
| 4143 | MAT1A  | 0.09  | 0.00  | 0.00  | 0.03  |
| 4144 | MAT2A  | 0.00  | 0.00  | 0.00  | NaN   |
| 4145 | MATK   | 0.00  | 0.00  | 0.00  | NaN   |
| 4146 | MATN1  | 0.00  | 0.00  | 0.00  | NaN   |
| 4147 | MATN2  | 0.00  | 0.00  | 0.00  | NaN   |
| 4148 | MATN3  | 0.09  | 0.00  | -0.05 | 0.67  |
| 4149 | MAX    | 0.00  | 0.00  | 0.00  | NaN   |
| 4150 | MAZ    | 0.00  | 0.00  | 0.00  | NaN   |
| 4151 | MB     | 0.00  | 0.00  | 0.00  | -0.01 |
| 4152 | MBD1   | 0.00  | -0.13 | -0.05 | 0.07  |
| 4153 | MBL2   | 0.00  | 0.00  | 0.00  | -0.15 |
| 4154 | MBNL   | 0.00  | 0.00  | 0.00  | NaN   |
| 4157 | MC1R   | -0.09 | -0.13 | -0.05 | -0.23 |
| 4158 | MC2R   | 0.00  | 0.00  | 0.00  | NaN   |
| 4159 | MC3R   | 0.09  | 0.50  | 0.00  | -0.16 |
| 4160 | MC4R   | 0.00  | 0.00  | -0.15 | -0.23 |
| 4161 | MC5R   | 0.00  | 0.00  | 0.00  | NaN   |
| 4162 | MCAM   | -0.09 | 0.00  | -0.10 | 0.30  |

|      |        |       |       |       |       |
|------|--------|-------|-------|-------|-------|
| 4163 | MCC    | 0.00  | 0.00  | 0.00  | NaN   |
| 4166 | CHST6  | 0.00  | -0.13 | 0.05  | 0.29  |
| 4170 | MCL1   | 0.00  | 0.13  | 0.05  | 0.35  |
| 4171 | MCM2   | 0.00  | 0.00  | 0.00  | NaN   |
| 4172 | MCM3   | 0.00  | 0.00  | 0.00  | NaN   |
| 4173 | MCM4   | 0.00  | 0.00  | 0.00  | NaN   |
| 4174 | MCM5   | 0.00  | 0.00  | 0.00  | NaN   |
| 4175 | MCM6   | 0.00  | 0.00  | -0.05 | 0.57  |
| 4176 | MCM7   | 0.18  | 0.00  | 0.00  | 0.22  |
| 4179 | MCP    | 0.09  | 0.13  | 0.00  | 0.30  |
| 4184 | MCSP   | 0.00  | 0.00  | 0.00  | NaN   |
| 4185 | ADAM11 | 0.00  | -0.13 | 0.00  | -0.02 |
| 4188 | MDFI   | 0.00  | 0.00  | 0.05  | -0.10 |
| 4189 | DNAJB9 | 0.09  | 0.00  | 0.00  | 0.00  |
| 4190 | MDH1   | 0.00  | 0.00  | 0.00  | NaN   |
| 4191 | MDH2   | -0.09 | 0.00  | 0.00  | 0.46  |
| 4192 | MDK    | 0.00  | 0.00  | 0.00  | NaN   |
| 4193 | MDM2   | 0.09  | 0.13  | 0.00  | 0.28  |
| 4194 | MDM4   | 0.00  | 0.13  | 0.00  | 0.41  |
| 4199 | ME1    | 0.00  | 0.00  | 0.00  | NaN   |
| 4200 | ME2    | -0.09 | -0.13 | -0.25 | 0.40  |
| 4201 | MEA    | 0.00  | 0.00  | 0.00  | NaN   |
| 4205 | MEF2A  | 0.00  | 0.00  | 0.00  | NaN   |
| 4207 | MEF2B  | 0.00  | 0.00  | 0.00  | NaN   |
| 4208 | MEF2C  | 0.00  | -0.13 | 0.00  | 0.10  |
| 4209 | MEF2D  | 0.00  | 0.13  | 0.00  | 0.09  |
| 4210 | MEFV   | 0.00  | 0.00  | 0.00  | NaN   |
| 4211 | MEIS1  | 0.00  | 0.00  | 0.00  | NaN   |
| 4212 | MEIS2  | 0.00  | 0.00  | 0.00  | NaN   |
| 4214 | MAP3K1 | 0.00  | 0.00  | 0.00  | NaN   |
| 4215 | MAP3K3 | 0.27  | 0.13  | 0.00  | 0.53  |
| 4216 | MAP3K4 | 0.00  | 0.00  | 0.00  | NaN   |
| 4217 | MAP3K5 | 0.00  | 0.00  | 0.00  | NaN   |
| 4218 | MEL    | 0.00  | 0.13  | 0.00  | -0.24 |
| 4221 | MEN1   | 0.00  | 0.50  | 0.00  | 0.24  |
| 4222 | MEOX1  | 0.00  | -0.13 | 0.00  | -0.32 |
| 4223 | MEOX2  | 0.00  | 0.13  | 0.05  | 0.19  |
| 4224 | MEP1A  | 0.00  | 0.00  | 0.00  | NaN   |
| 4225 | MEP1B  | 0.00  | 0.00  | -0.15 | -0.09 |
| 4232 | MEST   | 0.00  | 0.25  | 0.05  | 0.02  |
| 4233 | MET    | 0.00  | 0.25  | 0.00  | 0.11  |
| 4234 | METTL1 | 0.00  | 0.00  | 0.00  | NaN   |
| 4236 | MFAP1  | 0.00  | 0.00  | 0.00  | NaN   |
| 4237 | MFAP2  | -0.09 | 0.00  | 0.00  | 0.10  |
| 4238 | MFAP3  | 0.00  | 0.00  | 0.00  | NaN   |
| 4239 | MFAP4  | 0.00  | 0.00  | 0.00  | NaN   |
| 4240 | MFGES  | 0.00  | 0.00  | -0.05 | 0.14  |

|      |         |       |       |       |       |
|------|---------|-------|-------|-------|-------|
| 4241 | MFI2    | 0.50  | 0.00  | 0.50  | 0.05  |
| 4242 | MFNG    | -0.09 | 0.00  | 0.05  | 0.08  |
| 4245 | MGAT1   | 0.00  | 0.13  | 0.00  | 0.52  |
| 4246 | SCGB2A1 | -0.09 | 0.00  | 0.00  | -0.51 |
| 4247 | MGAT2   | 0.00  | 0.00  | 0.00  | NaN   |
| 4248 | MGAT3   | -0.09 | 0.00  | 0.05  | -0.08 |
| 4249 | MGAT5   | 0.00  | 0.00  | -0.05 | -0.08 |
| 4250 | SCGB2A2 | -0.09 | 0.00  | 0.00  | -0.35 |
| 4253 | MGEA6   | 0.00  | 0.00  | 0.00  | NaN   |
| 4254 | KITLG   | 0.09  | 0.13  | 0.00  | -0.09 |
| 4255 | MGMT    | 0.00  | 0.00  | -0.05 | 0.02  |
| 4256 | MGP     | -0.09 | 0.00  | 0.00  | -0.22 |
| 4258 | MGST2   | 0.00  | 0.00  | 0.00  | NaN   |
| 4259 | MGST3   | 0.00  | 0.00  | 0.00  | NaN   |
| 4261 | MHC2TA  | 0.00  | 0.00  | 0.00  | NaN   |
| 4276 | MICA    | 0.00  | 0.00  | 0.00  | NaN   |
| 4277 | MICB    | 0.00  | 0.00  | 0.00  | NaN   |
| 4283 | MIG     | 0.00  | 0.00  | 0.00  | NaN   |
| 4285 | MIPEP   | 0.00  | 0.00  | -0.05 | 0.31  |
| 4286 | MITF    | -0.09 | 0.00  | 0.00  | 0.52  |
| 4287 | MJD     | 0.00  | 0.00  | 0.00  | NaN   |
| 4288 | MKI67   | 0.00  | 0.00  | -0.05 | 0.24  |
| 4289 | MKLN1   | 0.00  | 0.25  | 0.00  | 0.23  |
| 4291 | MLF1    | 0.00  | 0.00  | 0.00  | NaN   |
| 4292 | MLH1    | 0.00  | 0.00  | 0.00  | NaN   |
| 4293 | MAP3K9  | 0.00  | 0.00  | 0.00  | NaN   |
| 4294 | MAP3K10 | 0.00  | 0.00  | 0.00  | NaN   |
| 4295 | MLN     | 0.00  | 0.00  | 0.00  | NaN   |
| 4296 | MAP3K11 | -0.09 | 0.00  | 0.05  | 0.33  |
| 4297 | MLL     | 0.00  | 0.00  | 0.00  | NaN   |
| 4298 | MLLT1   | 0.00  | 0.00  | 0.00  | NaN   |
| 4299 | MLLT2   | 0.00  | 0.00  | 0.00  | NaN   |
| 4300 | MLLT3   | 0.00  | -0.25 | -0.15 | 0.09  |
| 4301 | MLLT4   | 0.00  | 0.00  | 0.00  | NaN   |
| 4306 | NR3C2   | 0.00  | 0.00  | 0.00  | 0.06  |
| 4308 | TRPM1   | 0.00  | 0.00  | 0.00  | NaN   |
| 4311 | MME     | 0.00  | 0.00  | 0.00  | NaN   |
| 4312 | MMP1    | 0.00  | 0.13  | 0.00  | 0.00  |
| 4313 | MMP2    | 0.09  | 0.00  | 0.00  | -0.05 |
| 4314 | MMP3    | 0.00  | 0.13  | 0.00  | 0.04  |
| 4316 | MMP7    | 0.00  | 0.13  | 0.00  | -0.04 |
| 4317 | MMP8    | 0.00  | 0.13  | 0.00  | 0.08  |
| 4318 | MMP9    | 0.00  | 0.00  | 0.00  | NaN   |
| 4319 | MMP10   | 0.00  | 0.13  | 0.00  | 0.43  |
| 4320 | MMP11   | 0.00  | 0.00  | 0.05  | 0.06  |
| 4321 | MMP12   | 0.00  | 0.13  | 0.00  | 0.02  |
| 4322 | MMP13   | 0.00  | 0.13  | 0.00  | 0.33  |

|      |         |       |       |       |       |
|------|---------|-------|-------|-------|-------|
| 4323 | MMP14   | 0.00  | 0.00  | 0.00  | NaN   |
| 4324 | MMP15   | -0.09 | 0.00  | 0.00  | -0.03 |
| 4325 | MMP16   | 0.18  | 0.38  | 0.00  | 0.23  |
| 4326 | MMP17   | 0.00  | 0.00  | 0.00  | NaN   |
| 4327 | MMP19   | 0.00  | 0.00  | 0.00  | NaN   |
| 4329 | ALDH6A1 | 0.00  | 0.00  | 0.00  | NaN   |
| 4331 | MNAT1   | 0.00  | 0.00  | 0.00  | NaN   |
| 4332 | MNDA    | 0.00  | 0.00  | 0.00  | NaN   |
| 4335 | MNT     | 0.00  | -0.13 | 0.00  | -0.07 |
| 4336 | MOBP    | 0.00  | 0.00  | -0.05 | 0.09  |
| 4338 | MOCS2   | 0.00  | 0.00  | -0.05 | 0.38  |
| 4340 | MOG     | 0.00  | 0.00  | 0.00  | NaN   |
| 4342 | MOS     | 0.00  | 0.00  | 0.00  | NaN   |
| 4345 | MOX2    | 0.00  | 0.00  | 0.00  | NaN   |
| 4350 | MPG     | 0.00  | 0.00  | -0.05 | 0.20  |
| 4351 | MPI     | 0.00  | 0.00  | 0.00  | NaN   |
| 4352 | MPL     | 0.00  | 0.00  | 0.00  | NaN   |
| 4353 | MPO     | 0.09  | 0.00  | 0.00  | 0.20  |
| 4356 | MPP3    | 0.00  | -0.13 | 0.00  | -0.24 |
| 4357 | MPST    | 0.00  | 0.00  | 0.00  | NaN   |
| 4358 | MPV17   | 0.09  | 0.00  | 0.05  | 0.26  |
| 4359 | MPZ     | 0.00  | 0.00  | 0.05  | -0.10 |
| 4361 | MRE11A  | -0.09 | 0.13  | -0.05 | 0.37  |
| 4363 | ABCC1   | 0.00  | 0.00  | 0.00  | NaN   |
| 4430 | MYO1B   | 0.00  | 0.00  | 0.00  | NaN   |
| 4436 | MSH2    | 0.00  | 0.00  | 0.00  | NaN   |
| 4437 | MSH3    | 0.00  | 0.00  | 0.00  | NaN   |
| 4438 | MSH4    | 0.00  | 0.00  | 0.00  | NaN   |
| 4439 | MSH5    | 0.00  | 0.00  | 0.00  | NaN   |
| 4440 | MSI1    | 0.00  | -0.13 | 0.00  | -0.07 |
| 4477 | MSMB    | 0.00  | 0.00  | 0.00  | NaN   |
| 4481 | MSR1    | 0.00  | -0.13 | -0.05 | 0.03  |
| 4482 | MSRA    | -0.09 | -0.38 | -0.15 | 0.24  |
| 4485 | MST1    | -0.09 | 0.00  | -0.05 | 0.15  |
| 4486 | MST1R   | -0.09 | 0.00  | -0.05 | 0.19  |
| 4487 | MSX1    | 0.00  | -0.13 | -0.15 | 0.00  |
| 4488 | MSX2    | 0.00  | 0.00  | 0.00  | NaN   |
| 4495 | MT1G    | -0.09 | 0.00  | 0.00  | 0.08  |
| 4496 | MT1H    | -0.09 | 0.00  | 0.00  | 0.03  |
| 4501 | MT1X    | -0.09 | 0.00  | 0.00  | 0.05  |
| 4502 | MT2A    | -0.09 | 0.00  | 0.00  | 0.01  |
| 4504 | MT3     | -0.09 | 0.00  | 0.00  | 0.10  |
| 4507 | MTAP    | 0.00  | -0.13 | -0.15 | 0.51  |
| 4521 | NUDT1   | 0.00  | 0.13  | 0.05  | 0.41  |
| 4522 | MTHFD1  | 0.00  | 0.00  | 0.05  | 0.01  |
| 4524 | MTHFR   | 0.00  | 0.00  | 0.00  | NaN   |
| 4528 | MTIF2   | 0.09  | 0.00  | 0.00  | -0.13 |

|      |         |       |       |       |       |
|------|---------|-------|-------|-------|-------|
| 4542 | MYO1F   | 0.00  | 0.00  | 0.00  | NaN   |
| 4543 | MTNR1A  | 0.00  | 0.00  | 0.00  | 0.08  |
| 4544 | MTNR1B  | 0.00  | 0.00  | -0.05 | 0.22  |
| 4547 | MTP     | 0.00  | 0.00  | 0.05  | -0.02 |
| 4548 | MTR     | 0.09  | 0.00  | 0.00  | 0.41  |
| 4552 | MTRR    | 0.00  | 0.00  | 0.05  | 0.64  |
| 4580 | MTX1    | 0.27  | 0.13  | 0.00  | 0.66  |
| 4582 | MUC1    | 0.50  | 0.50  | 0.00  | 0.43  |
| 4583 | MUC2    | -0.27 | -0.13 | -0.05 | -0.08 |
| 4585 | MUC4    | 0.18  | 0.00  | 0.00  | 0.46  |
| 4586 | MUC5AC  | -0.27 | -0.13 | -0.05 | -0.27 |
| 4588 | MUC6    | -0.27 | -0.13 | -0.05 | -0.08 |
| 4593 | MUSK    | 0.00  | 0.00  | 0.00  | NaN   |
| 4594 | MUT     | 0.00  | 0.00  | 0.00  | NaN   |
| 4595 | MUTYH   | 0.00  | 0.00  | 0.00  | NaN   |
| 4597 | MVD     | -0.09 | -0.13 | -0.05 | 0.24  |
| 4598 | MVK     | 0.00  | 0.00  | 0.00  | NaN   |
| 4599 | MX1     | 0.00  | 0.00  | 0.00  | NaN   |
| 4600 | MX2     | 0.00  | 0.00  | 0.00  | NaN   |
| 4601 | MXI1    | 0.00  | 0.00  | -0.05 | 0.18  |
| 4602 | MYB     | 0.00  | 0.00  | 0.05  | 0.31  |
| 4603 | MYBL1   | 0.00  | 0.00  | 0.05  | 0.41  |
| 4605 | MYBL2   | 0.09  | -0.13 | 0.00  | -0.05 |
| 4606 | MYBPC2  | 0.00  | 0.00  | 0.00  | NaN   |
| 4608 | MYBPH   | 0.00  | 0.13  | 0.00  | -0.21 |
| 4609 | MYC     | 0.18  | 0.38  | 0.30  | 0.00  |
| 4610 | MYCL1   | 0.00  | 0.00  | 0.00  | NaN   |
| 4613 | MYCN    | 0.09  | 0.00  | -0.10 | 0.26  |
| 4615 | MYD88   | 0.00  | 0.25  | 0.00  | 0.76  |
| 4616 | GADD45B | 0.00  | 0.00  | 0.00  | NaN   |
| 4617 | MYF5    | 0.00  | 0.13  | 0.00  | -0.04 |
| 4618 | MYF6    | 0.00  | 0.13  | 0.00  | 0.04  |
| 4619 | MYH1    | 0.00  | 0.00  | 0.00  | NaN   |
| 4620 | MYH2    | 0.00  | 0.00  | 0.00  | NaN   |
| 4621 | MYH3    | 0.00  | 0.00  | 0.00  | NaN   |
| 4622 | MYH4    | 0.00  | 0.00  | 0.00  | NaN   |
| 4624 | MYH6    | 0.00  | 0.00  | 0.00  | NaN   |
| 4625 | MYH7    | 0.00  | 0.00  | 0.00  | NaN   |
| 4626 | MYH8    | 0.00  | 0.00  | 0.00  | NaN   |
| 4627 | MYH9    | -0.09 | 0.00  | 0.00  | 0.04  |
| 4629 | MYH11   | 0.00  | 0.00  | 0.00  | NaN   |
| 4632 | MYL1    | 0.00  | 0.00  | 0.00  | NaN   |
| 4633 | MYL2    | 0.00  | 0.00  | 0.00  | NaN   |
| 4634 | MYL3    | -0.09 | 0.00  | -0.05 | -0.08 |
| 4635 | MYL4    | 0.00  | -0.13 | 0.00  | 0.03  |
| 4636 | MYL5    | 0.00  | -0.13 | -0.10 | 0.32  |
| 4637 | MYL6    | 0.00  | 0.00  | 0.00  | NaN   |

|      |          |       |       |       |       |
|------|----------|-------|-------|-------|-------|
| 4638 | MYLK     | 0.00  | 0.00  | 0.00  | NaN   |
| 4640 | MYO1A    | 0.00  | 0.00  | 0.00  | NaN   |
| 4641 | MYO1C    | 0.00  | 0.00  | 0.50  | 0.20  |
| 4642 | MYO1D    | 0.00  | 0.00  | 0.00  | NaN   |
| 4643 | MYO1E    | 0.09  | 0.00  | 0.05  | 0.07  |
| 4644 | MYO5A    | 0.09  | 0.00  | 0.00  | 0.37  |
| 4646 | MYO6     | 0.00  | 0.00  | 0.05  | -0.15 |
| 4647 | MYO7A    | 0.27  | 0.00  | 0.00  | 0.11  |
| 4649 | MYO9A    | 0.00  | 0.00  | 0.00  | NaN   |
| 4650 | MYO9B    | 0.00  | 0.00  | 0.00  | NaN   |
| 4651 | MYO10    | 0.00  | 0.00  | 0.10  | 0.32  |
| 4653 | MYOC     | 0.00  | 0.00  | 0.00  | NaN   |
| 4654 | MYOD1    | 0.00  | 0.00  | 0.00  | NaN   |
| 4656 | MYOG     | 0.00  | 0.13  | 0.00  | -0.20 |
| 4659 | PPP1R12A | 0.00  | 0.13  | 0.00  | 0.15  |
| 4660 | PPP1R12B | 0.09  | 0.13  | 0.00  | 0.04  |
| 4661 | MYT1     | 0.00  | 0.00  | 0.00  | NaN   |
| 4664 | NAB1     | 0.00  | 0.00  | 0.00  | NaN   |
| 4665 | NAB2     | 0.00  | 0.00  | 0.00  | NaN   |
| 4666 | NACA     | 0.00  | 0.00  | 0.00  | NaN   |
| 4668 | NAGA     | 0.00  | 0.00  | 0.05  | 0.22  |
| 4669 | NAGLU    | 0.00  | -0.13 | 0.00  | 0.07  |
| 4670 | HNRPM    | 0.00  | 0.00  | 0.00  | NaN   |
| 4671 | BIRC1    | 0.00  | 0.00  | 0.00  | NaN   |
| 4673 | NAP1L1   | 0.00  | 0.00  | 0.00  | NaN   |
| 4676 | NAP1L4   | 0.00  | -0.13 | -0.05 | 0.48  |
| 4677 | NARS     | -0.09 | 0.00  | -0.20 | 0.50  |
| 4678 | NASP     | 0.00  | 0.00  | 0.00  | NaN   |
| 4680 | CEACAM6  | 0.00  | 0.00  | -0.05 | 0.15  |
| 4681 | NBL1     | -0.09 | 0.00  | 0.00  | 0.18  |
| 4682 | NUBP1    | 0.00  | 0.00  | 0.00  | NaN   |
| 4683 | NBS1     | 0.18  | 0.25  | 0.05  | 0.70  |
| 4684 | NCAM1    | 0.00  | 0.00  | 0.00  | NaN   |
| 4686 | NCBP1    | 0.00  | 0.00  | 0.00  | NaN   |
| 4688 | NCF2     | 0.00  | 0.00  | 0.00  | NaN   |
| 4689 | NCF4     | -0.09 | 0.00  | 0.00  | -0.06 |
| 4690 | NCK1     | 0.00  | 0.00  | 0.00  | NaN   |
| 4692 | NDN      | 0.00  | -0.13 | 0.00  | 0.04  |
| 4695 | NDUFA2   | 0.00  | 0.00  | 0.00  | NaN   |
| 4696 | NDUFA3   | 0.09  | 0.00  | 0.00  | 0.30  |
| 4697 | NDUFA4   | 0.00  | 0.13  | 0.05  | 0.37  |
| 4698 | NDUFA5   | 0.00  | 0.13  | 0.00  | 0.24  |
| 4700 | NDUFA6   | 0.00  | 0.00  | 0.05  | 0.16  |
| 4701 | NDUFA7   | 0.00  | 0.13  | 0.00  | 0.01  |
| 4702 | NDUFA8   | 0.00  | 0.00  | 0.00  | NaN   |
| 4703 | NEB      | 0.00  | 0.00  | 0.00  | NaN   |
| 4704 | NDUFA9   | -0.09 | 0.00  | 0.05  | 0.44  |

|      |         |       |       |       |       |
|------|---------|-------|-------|-------|-------|
| 4705 | NDUFA10 | 0.00  | 0.00  | -0.05 | 0.36  |
| 4706 | NDUFAB1 | 0.00  | 0.00  | -0.05 | 0.43  |
| 4707 | NDUFB1  | 0.00  | 0.00  | 0.00  | NaN   |
| 4708 | NDUFB2  | 0.00  | 0.00  | 0.00  | NaN   |
| 4709 | NDUFB3  | 0.00  | 0.00  | 0.00  | NaN   |
| 4710 | NDUFB4  | 0.00  | 0.00  | 0.00  | NaN   |
| 4711 | NDUFB5  | 0.09  | 0.00  | 0.00  | 0.45  |
| 4712 | NDUFB6  | -0.09 | 0.25  | 0.00  | 0.25  |
| 4713 | NDUFB7  | 0.00  | -0.13 | 0.00  | 0.05  |
| 4714 | NDUFB8  | 0.00  | -0.13 | -0.05 | 0.36  |
| 4717 | NDUFC1  | 0.00  | 0.00  | 0.00  | NaN   |
| 4718 | NDUFC2  | 0.27  | 0.00  | 0.00  | 0.77  |
| 4719 | NDUFS1  | 0.00  | 0.00  | 0.00  | NaN   |
| 4720 | NDUFS2  | 0.00  | 0.00  | 0.00  | NaN   |
| 4722 | NDUFS3  | 0.00  | 0.00  | 0.00  | NaN   |
| 4724 | NDUFS4  | 0.00  | 0.00  | -0.05 | 0.60  |
| 4725 | NDUFS5  | 0.00  | 0.00  | 0.00  | NaN   |
| 4726 | NDUFS6  | 0.00  | 0.13  | 0.10  | 0.47  |
| 4728 | NDUFS8  | 0.18  | 0.00  | 0.05  | 0.59  |
| 4729 | NDUFV2  | 0.00  | 0.00  | 0.00  | NaN   |
| 4733 | DRG1    | 0.00  | 0.13  | 0.00  | 0.07  |
| 4734 | NEDD4   | 0.00  | 0.00  | 0.05  | -0.05 |
| 4735 | NEDD5   | 0.00  | 0.00  | -0.05 | 0.37  |
| 4736 | RPL10A  | 0.00  | 0.00  | 0.00  | NaN   |
| 4738 | NEDD8   | 0.00  | 0.00  | 0.00  | NaN   |
| 4741 | NEF3    | 0.00  | -0.13 | -0.05 | 0.26  |
| 4744 | NEFH    | -0.09 | 0.13  | 0.00  | 0.04  |
| 4745 | NELL1   | 0.00  | 0.00  | 0.50  | -0.02 |
| 4747 | NEFL    | 0.00  | -0.13 | -0.05 | 0.02  |
| 4750 | NEK1    | 0.00  | 0.00  | -0.05 | 0.31  |
| 4751 | NEK2    | 0.00  | 0.00  | 0.00  | NaN   |
| 4752 | NEK3    | 0.00  | 0.00  | 0.00  | NaN   |
| 4753 | NELL2   | 0.00  | 0.50  | 0.00  | -0.01 |
| 4756 | NEO1    | 0.00  | 0.00  | 0.00  | NaN   |
| 4758 | NEU1    | 0.00  | 0.00  | 0.00  | NaN   |
| 4759 | NEU2    | 0.00  | 0.00  | 0.00  | NaN   |
| 4760 | NEUROD1 | 0.00  | 0.00  | 0.00  | NaN   |
| 4761 | NEUROD2 | 0.00  | 1.00  | 0.00  | 0.35  |
| 4762 | NEUROG1 | 0.00  | -0.13 | 0.00  | 0.08  |
| 4763 | NF1     | 0.00  | 0.00  | 0.00  | NaN   |
| 4771 | NF2     | -0.09 | 0.00  | 0.00  | 0.24  |
| 4772 | NFATC1  | -0.09 | 0.00  | -0.25 | 0.13  |
| 4775 | NFATC3  | -0.09 | -0.13 | 0.00  | 0.24  |
| 4776 | NFATC4  | 0.00  | 0.00  | 0.00  | NaN   |
| 4778 | NFE2    | 0.00  | 0.00  | 0.00  | NaN   |
| 4779 | NFE2L1  | 0.00  | 0.50  | 0.50  | 0.38  |
| 4780 | NFE2L2  | 0.00  | 0.00  | 0.00  | NaN   |



|      |         |       |       |       |       |
|------|---------|-------|-------|-------|-------|
| 4781 | NFIB    | 0.00  | 0.00  | 0.05  | 0.41  |
| 4782 | NFIC    | 0.00  | 0.00  | 0.00  | NaN   |
| 4783 | NFIL3   | 0.00  | 0.00  | 0.00  | NaN   |
| 4784 | NFIX    | 0.00  | 0.00  | 0.00  | NaN   |
| 4790 | NFKB1   | 0.00  | 0.00  | 0.00  | NaN   |
| 4791 | NFKB2   | 0.00  | -0.13 | -0.05 | 0.22  |
| 4792 | NFKBIA  | 0.00  | 0.00  | 0.00  | NaN   |
| 4793 | NFKBIB  | 0.00  | 0.00  | 0.00  | NaN   |
| 4794 | NFKBIE  | 0.00  | 0.00  | 0.00  | NaN   |
| 4795 | NFKBIL1 | 0.00  | 0.00  | 0.00  | NaN   |
| 4798 | NFRKB   | -0.09 | 0.00  | -0.10 | 0.35  |
| 4799 | NFX1    | -0.09 | 0.00  | 0.05  | 0.39  |
| 4800 | NFYA    | 0.00  | 0.00  | 0.00  | NaN   |
| 4801 | NFYB    | 0.00  | 0.00  | 0.00  | NaN   |
| 4802 | NFYC    | 0.00  | 0.00  | 0.00  | NaN   |
| 4803 | NGFB    | 0.09  | 0.00  | 0.10  | 0.28  |
| 4804 | NGFR    | 0.00  | 0.25  | 0.00  | 0.01  |
| 4808 | NHLH2   | 0.09  | 0.00  | 0.10  | -0.05 |
| 4809 | NHP2L1  | 0.00  | 0.00  | 0.05  | 0.36  |
| 4811 | NID     | 0.09  | 0.00  | 0.00  | -0.18 |
| 4814 | NINJ1   | 0.00  | 0.00  | 0.00  | NaN   |
| 4815 | NINJ2   | 0.00  | 0.00  | 0.05  | 0.29  |
| 4817 | NIT1    | 0.00  | 0.00  | 0.00  | NaN   |
| 4818 | NKG7    | 0.00  | 0.13  | -0.05 | 0.26  |
| 4820 | NKTR    | 0.00  | 0.00  | -0.05 | 0.31  |
| 4821 | NKX2B   | 0.00  | 0.00  | 0.00  | NaN   |
| 4824 | NKX3A   | -0.09 | -0.25 | -0.15 | 0.21  |
| 4825 | NKX6A   | 0.00  | 0.00  | 0.00  | NaN   |
| 4826 | NNAT    | 0.00  | -0.13 | 0.00  | -0.33 |
| 4828 | NMB     | 0.09  | 0.00  | -0.05 | 0.17  |
| 4829 | NMBR    | -0.09 | -0.13 | 0.00  | 0.10  |
| 4830 | NME1    | 0.00  | 0.25  | 0.00  | 0.44  |
| 4831 | NME2    | 0.00  | 0.25  | 0.00  | 0.55  |
| 4832 | NME3    | 0.00  | 0.00  | 0.00  | NaN   |
| 4833 | NME4    | 0.00  | 0.00  | -0.05 | -0.01 |
| 4835 | NQO2    | 0.00  | 0.00  | -0.10 | 0.39  |
| 4836 | NMT1    | 0.00  | -0.13 | 0.00  | 0.41  |
| 4837 | NNMT    | -0.09 | 0.00  | 0.00  | -0.09 |
| 4839 | NOL1    | -0.09 | 0.00  | 0.00  | 0.32  |
| 4842 | NOS1    | 0.00  | -0.13 | 0.00  | 0.07  |
| 4843 | NOS2A   | 0.00  | 0.13  | 0.00  | 0.23  |
| 4846 | NOS3    | 0.00  | 0.00  | -0.05 | 0.04  |
| 4848 | CNOT2   | 0.09  | 0.00  | 0.00  | 0.41  |
| 4849 | CNOT3   | 0.09  | 0.00  | 0.00  | 0.03  |
| 4850 | CNOT4   | 0.00  | 0.00  | 0.00  | NaN   |
| 4852 | NPY     | 0.00  | 0.13  | 0.00  | 0.07  |
| 4853 | NOTCH2  | 0.18  | 0.13  | 0.05  | 0.33  |

|      |         |       |       |       |       |
|------|---------|-------|-------|-------|-------|
| 4854 | NOTCH3  | 0.00  | 0.00  | 0.05  | 0.48  |
| 4855 | NOTCH4  | 0.00  | 0.00  | 0.00  | NaN   |
| 4856 | NOV     | 0.00  | 0.25  | 0.15  | -0.01 |
| 4857 | NOVA1   | 0.00  | 0.00  | 0.00  | NaN   |
| 4858 | NOVA2   | 0.09  | 0.00  | 0.00  | 0.07  |
| 4860 | NP      | 0.00  | 0.00  | 0.00  | NaN   |
| 4861 | NPAS1   | 0.09  | 0.00  | 0.00  | -0.10 |
| 4862 | NPAS2   | 0.00  | 0.00  | 0.00  | NaN   |
| 4863 | NPAT    | 0.00  | 0.00  | 0.00  | NaN   |
| 4864 | NPC1    | 0.00  | 0.00  | -0.15 | 0.41  |
| 4867 | NPHP1   | 0.00  | 0.00  | 0.00  | NaN   |
| 4868 | NPHS1   | 0.00  | 0.00  | 0.00  | NaN   |
| 4869 | NPM1    | 0.00  | 0.00  | 0.00  | NaN   |
| 4879 | NPPB    | 0.00  | 0.00  | 0.00  | NaN   |
| 4880 | NPPC    | 0.00  | 0.00  | 0.00  | NaN   |
| 4881 | NPR1    | 0.09  | 0.13  | 0.00  | -0.02 |
| 4882 | NPR2    | -0.09 | 0.00  | 0.10  | 0.05  |
| 4883 | NPR3    | 0.00  | 0.00  | 0.15  | 0.25  |
| 4884 | NPTX1   | 0.00  | 0.00  | 0.00  | NaN   |
| 4885 | NPTX2   | 0.18  | 0.00  | 0.00  | -0.09 |
| 4886 | NPY1R   | 0.00  | 0.00  | 0.00  | NaN   |
| 4887 | NPY2R   | 0.00  | 0.00  | 0.00  | 0.09  |
| 4888 | NPY6R   | 0.00  | -0.13 | 0.00  | 0.02  |
| 4889 | NPY5R   | 0.00  | 0.00  | 0.00  | NaN   |
| 4891 | SLC11A2 | 0.00  | 0.00  | 0.00  | NaN   |
| 4893 | NRAS    | 0.18  | 0.00  | 0.10  | 0.48  |
| 4897 | NRCAM   | 0.09  | 0.00  | 0.00  | 0.16  |
| 4898 | NRD1    | 0.00  | 0.00  | 0.00  | NaN   |
| 4900 | NRGN    | 0.00  | 0.00  | -0.10 | 0.18  |
| 4901 | NRL     | 0.00  | 0.00  | 0.00  | NaN   |
| 4902 | NRTN    | 0.00  | 0.00  | 0.00  | NaN   |
| 4904 | NSEP1   | 0.00  | 0.00  | 0.00  | NaN   |
| 4905 | NSF     | -0.18 | -0.38 | -0.15 | 0.34  |
| 4907 | NT5E    | 0.00  | 0.00  | 0.00  | NaN   |
| 4908 | NTF3    | -0.09 | 0.00  | 0.00  | -0.34 |
| 4913 | NTHL1   | 0.00  | 0.13  | 0.05  | 0.19  |
| 4914 | NTRK1   | 0.00  | 0.00  | 0.00  | NaN   |
| 4915 | NTRK2   | 0.00  | 0.00  | 0.00  | NaN   |
| 4916 | NTRK3   | 0.00  | 0.00  | -0.05 | 0.13  |
| 4917 | NTN2L   | 0.00  | 0.00  | 0.00  | NaN   |
| 4919 | ROR1    | 0.00  | 0.00  | -0.05 | 0.06  |
| 4920 | ROR2    | 0.00  | 0.00  | 0.00  | NaN   |
| 4921 | DDR2    | 0.00  | 0.00  | 0.00  | -0.18 |
| 4922 | NTS     | 0.00  | 0.13  | 0.00  | 0.52  |
| 4923 | NTSR1   | 0.09  | 0.13  | 0.00  | 0.03  |
| 4924 | NUCB1   | 0.09  | 0.00  | 0.00  | 0.21  |
| 4925 | NUCB2   | 0.00  | 0.00  | 0.00  | NaN   |

|      |           |       |       |       |       |
|------|-----------|-------|-------|-------|-------|
| 4926 | NUMA1     | 0.00  | -0.13 | 0.00  | 0.03  |
| 4927 | NUP88     | 0.00  | 0.00  | 0.00  | NaN   |
| 4928 | NUP98     | 0.00  | -0.13 | 0.00  | 0.42  |
| 4929 | NR4A2     | 0.00  | 0.00  | -0.05 | 0.09  |
| 4931 | NVL       | 0.09  | 0.00  | 0.00  | 0.36  |
| 4938 | OAS1      | 0.00  | 0.00  | 0.00  | NaN   |
| 4939 | OAS2      | 0.00  | 0.00  | 0.00  | NaN   |
| 4940 | OAS3      | 0.00  | 0.00  | 0.00  | NaN   |
| 4942 | OAT       | 0.00  | 0.00  | -0.05 | 0.13  |
| 4947 | OAZ2      | 0.00  | 0.00  | 0.00  | NaN   |
| 4948 | OCA2      | 0.00  | -0.13 | 0.00  | 0.04  |
| 4950 | OCLN      | 0.00  | 0.00  | 0.00  | NaN   |
| 4951 | OCM       | 0.50  | 0.00  | 0.50  | -0.05 |
| 4952 | OCRL      | 0.00  | 0.00  | -0.05 | 0.02  |
| 4953 | ODC1      | 0.00  | 0.13  | -0.05 | 0.04  |
| 4956 | ODF1      | 0.50  | 0.50  | 0.00  | 0.30  |
| 4958 | OMD       | 0.00  | 0.00  | 0.00  | NaN   |
| 4967 | OGDH      | 0.00  | 0.00  | 0.00  | NaN   |
| 4968 | OGG1      | 0.00  | 0.00  | 0.00  | NaN   |
| 4969 | OGN       | 0.00  | 0.00  | 0.00  | NaN   |
| 4973 | OLR1      | -0.09 | 0.00  | 0.00  | -0.09 |
| 4974 | OMG       | 0.00  | 0.00  | 0.00  | NaN   |
| 4975 | OMP       | 0.27  | 0.00  | 0.00  | 0.09  |
| 4976 | OPA1      | 0.18  | 0.00  | 0.05  | 0.59  |
| 4978 | OPCML     | -0.09 | 0.00  | -0.15 | -0.29 |
| 4985 | OPRD1     | 0.00  | 0.00  | 0.00  | NaN   |
| 4986 | OPRK1     | 0.00  | 0.00  | 0.00  | NaN   |
| 4987 | OPRL1     | 0.00  | 0.00  | 0.00  | NaN   |
| 4988 | OPRM1     | 0.00  | 0.00  | 0.00  | NaN   |
| 4990 | SIX6      | 0.00  | 0.00  | 0.00  | NaN   |
| 4991 | OR1D2     | 0.00  | 0.00  | 0.00  | NaN   |
| 4992 | OR1F1     | 0.00  | 0.00  | 0.00  | NaN   |
| 4993 | OR2C1     | 0.00  | 0.00  | 0.00  | NaN   |
| 4994 | OR3A1     | 0.00  | 0.00  | 0.00  | NaN   |
| 4995 | OR3A2     | 0.00  | 0.00  | 0.00  | NaN   |
| 4998 | ORC1L     | 0.00  | 0.00  | 0.00  | NaN   |
| 4999 | ORC2L     | 0.00  | 0.00  | 0.00  | NaN   |
| 5000 | ORC4L     | 0.09  | 0.00  | 0.00  | -0.14 |
| 5001 | ORC5L     | 0.09  | 0.00  | 0.00  | 0.40  |
| 5002 | SLC22A1L  | 0.00  | -0.13 | -0.05 | 0.13  |
| 5003 | SLC22A1LS | 0.00  | -0.13 | -0.05 | 0.12  |
| 5004 | ORM1      | 0.09  | 0.00  | 0.00  | 0.06  |
| 5005 | ORM2      | 0.09  | 0.00  | 0.00  | -0.07 |
| 5007 | OSBP      | 0.00  | 0.00  | 0.00  | NaN   |
| 5008 | OSM       | 0.00  | 0.00  | 0.00  | NaN   |
| 5010 | CLDN11    | 0.09  | 0.00  | 0.00  | 0.14  |
| 5016 | OVGP1     | 0.09  | 0.00  | 0.00  | 0.13  |

|      |          |       |       |       |       |
|------|----------|-------|-------|-------|-------|
| 5017 | OVOL1    | -0.09 | 0.13  | 0.05  | 0.24  |
| 5018 | OXA1L    | 0.00  | 0.00  | 0.00  | NaN   |
| 5019 | OXCT     | 0.00  | 0.00  | 0.10  | 0.24  |
| 5020 | OXT      | 0.00  | 0.00  | 0.00  | NaN   |
| 5021 | OXTR     | 0.00  | 0.00  | 0.00  | NaN   |
| 5023 | P2RX1    | 0.00  | 0.00  | 0.00  | NaN   |
| 5024 | P2RX3    | 0.00  | 0.00  | 0.00  | NaN   |
| 5025 | P2RX4    | 0.00  | -0.13 | 0.00  | 0.12  |
| 5026 | P2RX5    | 0.00  | 0.00  | 0.00  | NaN   |
| 5027 | P2RX7    | 0.00  | -0.13 | 0.00  | 0.16  |
| 5028 | P2RY1    | 0.00  | 0.00  | 0.00  | NaN   |
| 5029 | P2RY2    | 0.00  | 0.13  | 0.00  | 0.31  |
| 5031 | P2RY6    | 0.00  | 0.13  | 0.00  | -0.04 |
| 5032 | P2RY11   | 0.00  | 0.00  | 0.05  | 0.00  |
| 5033 | P4HA1    | 0.09  | 0.00  | 0.00  | 0.14  |
| 5034 | P4HB     | 0.00  | 0.00  | 0.00  | NaN   |
| 5037 | PBP      | 0.00  | -0.13 | 0.00  | 0.12  |
| 5042 | PABPC3   | 0.00  | -0.13 | -0.15 | 0.10  |
| 5045 | PACE     | 0.00  | 0.00  | 0.00  | NaN   |
| 5046 | PACE4    | 0.00  | 0.00  | 0.00  | NaN   |
| 5047 | PAEP     | 0.00  | 0.00  | 0.00  | NaN   |
| 5048 | PAFAH1B1 | 0.00  | 0.00  | 0.00  | NaN   |
| 5049 | PAFAH1B2 | -0.09 | 0.13  | 0.05  | 0.00  |
| 5050 | PAFAH1B3 | 0.09  | 0.00  | -0.05 | 0.27  |
| 5051 | PAFAH2   | 0.00  | 0.00  | 0.00  | NaN   |
| 5052 | PRDX1    | 0.00  | 0.00  | 0.00  | NaN   |
| 5053 | PAH      | 0.00  | 0.00  | 0.00  | NaN   |
| 5054 | SERPINE1 | 0.18  | 0.00  | 0.00  | -0.06 |
| 5055 | SERPINB2 | -0.09 | 0.00  | -0.10 | -0.29 |
| 5058 | PAK1     | 0.27  | 0.00  | 0.00  | 0.89  |
| 5062 | PAK2     | 0.18  | 0.00  | 0.00  | 0.65  |
| 5064 | PALM     | 0.00  | 0.00  | 0.00  | NaN   |
| 5066 | PAM      | 0.00  | 0.00  | 0.00  | NaN   |
| 5068 | PAP      | 0.00  | 0.00  | 0.00  | NaN   |
| 5069 | PAPPA    | 0.00  | 0.00  | 0.05  | 0.27  |
| 5071 | PARK2    | 0.00  | 0.00  | 0.00  | NaN   |
| 5073 | PARN     | 0.00  | 0.00  | 0.00  | NaN   |
| 5074 | PAWR     | 0.00  | 0.50  | 0.00  | 0.23  |
| 5076 | PAX2     | 0.00  | -0.13 | -0.05 | 0.04  |
| 5077 | PAX3     | 0.00  | 0.00  | 0.00  | NaN   |
| 5078 | PAX4     | 0.00  | 0.25  | 0.00  | 0.19  |
| 5079 | PAX5     | -0.09 | 0.00  | 0.10  | -0.14 |
| 5080 | PAX6     | 0.00  | 0.00  | 0.00  | NaN   |
| 5081 | PAX7     | -0.09 | 0.00  | 0.00  | 0.02  |
| 5082 | PDCL     | 0.00  | 0.00  | 0.00  | NaN   |
| 5083 | PAX9     | 0.00  | 0.00  | 0.00  | NaN   |
| 5087 | PBX1     | 0.00  | 0.00  | 0.00  | NaN   |

|      |          |       |       |       |       |
|------|----------|-------|-------|-------|-------|
| 5090 | PBX3     | 0.00  | 0.00  | 0.00  | NaN   |
| 5092 | PCBD     | 0.09  | 0.00  | 0.00  | 0.29  |
| 5093 | PCBP1    | 0.00  | 0.00  | -0.05 | 0.50  |
| 5094 | PCBP2    | 0.00  | 0.00  | 0.00  | NaN   |
| 5095 | PCCA     | -0.09 | -0.13 | 0.00  | 0.40  |
| 5096 | PCCB     | 0.00  | 0.00  | 0.00  | NaN   |
| 5097 | PCDH1    | 0.00  | 0.00  | 0.00  | NaN   |
| 5098 | PCDHGC3  | 0.00  | 0.00  | 0.00  | NaN   |
| 5099 | PCDH7    | 0.00  | 0.00  | 0.00  | NaN   |
| 5100 | PCDH8    | 0.00  | 0.00  | 0.00  | NaN   |
| 5101 | PCDH9    | 0.00  | 0.13  | -0.15 | 0.12  |
| 5104 | SERPINA5 | 0.00  | 0.00  | 0.00  | NaN   |
| 5105 | PCK1     | 0.18  | 0.63  | 0.00  | -0.10 |
| 5106 | PCK2     | 0.00  | 0.00  | 0.00  | NaN   |
| 5110 | PCMT1    | 0.00  | 0.00  | 0.00  | NaN   |
| 5111 | PCNA     | 0.00  | 0.00  | 0.00  | NaN   |
| 5116 | PCNT2    | 0.00  | 0.00  | 0.00  | NaN   |
| 5118 | PCOLCE   | 0.18  | 0.00  | 0.00  | -0.03 |
| 5119 | PCOLN3   | -0.09 | -0.13 | 0.00  | 0.22  |
| 5121 | PCP4     | 0.00  | 0.00  | 0.00  | NaN   |
| 5122 | PCSK1    | 0.00  | 0.00  | 0.00  | NaN   |
| 5125 | PCSK5    | 0.00  | 0.00  | -0.05 | 0.04  |
| 5126 | PCSK2    | 0.00  | 0.00  | 0.00  | NaN   |
| 5128 | PCK2     | 0.00  | 0.13  | 0.00  | 0.46  |
| 5129 | PCK3     | 0.00  | 0.13  | 0.05  | 0.17  |
| 5130 | PCYT1A   | 0.18  | 0.00  | 0.00  | 0.46  |
| 5132 | PDC      | 0.00  | 0.00  | 0.00  | NaN   |
| 5133 | PDCD1    | 0.09  | 0.00  | -0.05 | 0.10  |
| 5134 | PDCD2    | 0.00  | 0.00  | 0.00  | NaN   |
| 5136 | PDE1A    | 0.00  | 0.00  | 0.00  | NaN   |
| 5137 | PDE1C    | 0.00  | 0.13  | 0.00  | 0.35  |
| 5138 | PDE2A    | 0.00  | 0.00  | 0.00  | NaN   |
| 5139 | PDE3A    | 0.00  | 0.00  | 0.00  | NaN   |
| 5140 | PDE3B    | 0.00  | 0.00  | 0.00  | NaN   |
| 5141 | PDE4A    | 0.00  | 0.00  | 0.05  | -0.02 |
| 5142 | PDE4B    | 0.00  | 0.00  | 0.00  | NaN   |
| 5143 | PDE4C    | 0.00  | 0.00  | 0.00  | NaN   |
| 5144 | PDE4D    | 0.00  | 0.00  | 0.00  | NaN   |
| 5145 | PDE6A    | 0.00  | 0.00  | 0.00  | NaN   |
| 5146 | PDE6C    | 0.00  | 0.00  | 0.00  | NaN   |
| 5147 | PDE6D    | 0.00  | 0.00  | 0.00  | NaN   |
| 5148 | PDE6G    | 0.00  | 0.00  | 0.00  | NaN   |
| 5149 | PDE6H    | -0.09 | 0.00  | 0.00  | 0.28  |
| 5151 | PDE8A    | 0.00  | 0.00  | -0.05 | 0.15  |
| 5152 | PDE9A    | 0.00  | 0.00  | 0.00  | NaN   |
| 5153 | PDE1B    | 0.00  | 0.00  | 0.00  | NaN   |
| 5154 | PDGFA    | 0.00  | 0.13  | 0.05  | 0.47  |

|      |          |       |       |       |       |
|------|----------|-------|-------|-------|-------|
| 5155 | PDGFB    | -0.09 | 0.00  | 0.05  | -0.05 |
| 5156 | PDGFRA   | 0.00  | 0.00  | 0.00  | NaN   |
| 5157 | PDGFRL   | 0.00  | -0.13 | -0.05 | 0.04  |
| 5158 | PDE6B    | 0.00  | -0.13 | -0.10 | 0.11  |
| 5159 | PDGFRB   | 0.00  | 0.00  | 0.00  | NaN   |
| 5161 | PDHA2    | 0.00  | 0.00  | 0.00  | NaN   |
| 5162 | PDHB     | 0.00  | -0.13 | -0.10 | 0.27  |
| 5163 | PDK1     | 0.00  | 0.00  | 0.00  | NaN   |
| 5164 | PDK2     | 0.00  | 0.25  | 0.00  | 0.61  |
| 5166 | PDK4     | 0.18  | 0.00  | 0.00  | 0.15  |
| 5167 | ENPP1    | 0.00  | 0.00  | 0.00  | NaN   |
| 5168 | ENPP2    | 0.00  | 0.25  | 0.15  | -0.04 |
| 5169 | ENPP3    | 0.00  | 0.00  | 0.00  | NaN   |
| 5170 | PDPK1    | 0.00  | 0.00  | 0.00  | NaN   |
| 5172 | SLC26A4  | 0.09  | 0.00  | 0.00  | -0.14 |
| 5173 | PDYN     | 0.00  | 0.00  | 0.05  | -0.17 |
| 5174 | PDZK1    | 0.00  | 0.00  | 0.05  | -0.05 |
| 5175 | PECAM1   | 0.27  | 0.13  | 0.00  | 0.15  |
| 5176 | SERPINF1 | 0.00  | -0.13 | 0.00  | 0.03  |
| 5178 | PEG3     | 0.09  | 0.13  | 0.05  | 0.40  |
| 5179 | PENK     | 0.00  | 0.00  | 0.00  | NaN   |
| 5184 | PEPD     | 0.00  | 0.00  | 0.05  | 0.09  |
| 5187 | PER1     | 0.00  | 0.00  | 0.00  | NaN   |
| 5188 | PET112L  | 0.00  | 0.00  | 0.00  | 0.62  |
| 5189 | PEX1     | 0.18  | 0.00  | 0.00  | 0.41  |
| 5190 | PEX6     | 0.00  | 0.00  | 0.00  | NaN   |
| 5191 | PEX7     | 0.00  | 0.00  | 0.00  | NaN   |
| 5192 | PEX10    | 0.00  | 0.00  | 0.00  | NaN   |
| 5193 | PEX12    | 0.00  | 0.00  | 0.00  | 0.52  |
| 5194 | PEX13    | 0.00  | 0.00  | 0.00  | NaN   |
| 5195 | PEX14    | 0.00  | 0.00  | 0.00  | NaN   |
| 5196 | PF4      | 0.00  | 0.00  | 0.00  | NaN   |
| 5197 | PF4V1    | 0.00  | 0.00  | 0.00  | NaN   |
| 5198 | PFAS     | 0.00  | 0.00  | 0.00  | NaN   |
| 5201 | PFDN1    | 0.00  | 0.00  | 0.50  | -0.13 |
| 5202 | PFDN2    | 0.00  | 0.00  | 0.00  | NaN   |
| 5203 | PFDN4    | 0.18  | 0.38  | 0.00  | 0.64  |
| 5204 | PFDN5    | 0.00  | 0.00  | 0.00  | NaN   |
| 5205 | ATP8B1   | -0.09 | 0.00  | -0.20 | -0.10 |
| 5208 | PFKFB2   | 0.00  | 0.13  | 0.00  | 0.04  |
| 5209 | PFKFB3   | 0.00  | 0.00  | 0.00  | NaN   |
| 5210 | PFKFB4   | -0.09 | 0.00  | -0.05 | 0.14  |
| 5211 | PFKL     | 0.00  | 0.00  | 0.00  | NaN   |
| 5213 | PFKM     | 0.00  | 0.00  | 0.00  | NaN   |
| 5214 | PFKP     | 0.00  | 0.00  | 0.00  | NaN   |
| 5216 | PFN1     | 0.00  | 0.00  | 0.00  | NaN   |
| 5217 | PFN2     | 0.00  | 0.00  | 0.05  | 0.31  |

|      |           |       |       |       |       |
|------|-----------|-------|-------|-------|-------|
| 5218 | PFTK1     | 0.09  | 0.00  | 0.00  | 0.48  |
| 5223 | PGAM1     | 0.00  | 0.00  | -0.05 | 0.17  |
| 5224 | PGAM2     | 0.00  | 0.00  | 0.00  | NaN   |
| 5225 | PGC       | 0.00  | 0.00  | 0.05  | -0.07 |
| 5226 | PGD       | 0.00  | 0.00  | 0.00  | NaN   |
| 5228 | PGF       | 0.00  | 0.00  | 0.00  | NaN   |
| 5229 | PGGT1B    | 0.00  | 0.00  | 0.00  | NaN   |
| 5236 | PGM1      | 0.00  | 0.00  | -0.05 | -0.02 |
| 5239 | PGM5      | 0.00  | 0.00  | -0.05 | -0.11 |
| 5241 | PGR       | 0.00  | 0.00  | -0.05 | 0.04  |
| 5243 | ABCB1     | 0.00  | 0.00  | 0.00  | NaN   |
| 5244 | ABCB4     | 0.00  | 0.00  | 0.00  | NaN   |
| 5245 | PHB       | 0.00  | 0.38  | 0.00  | 0.61  |
| 5250 | SLC25A3   | 0.00  | 0.00  | 0.00  | 0.62  |
| 5252 | PHF1      | 0.00  | 0.00  | 0.00  | NaN   |
| 5257 | PHKB      | -0.09 | 0.00  | 0.05  | 0.49  |
| 5260 | PHKG1     | 0.00  | 0.00  | 0.10  | 0.15  |
| 5261 | PHKG2     | 0.00  | 0.00  | 0.00  | NaN   |
| 5264 | PHYH      | 0.00  | 0.00  | 0.00  | NaN   |
| 5265 | SERPINA1  | 0.00  | 0.00  | 0.00  | NaN   |
| 5266 | PI3       | 0.00  | 0.13  | 0.00  | -0.07 |
| 5267 | SERPINA4  | 0.00  | 0.00  | 0.00  | NaN   |
| 5268 | SERPINB5  | -0.09 | 0.00  | -0.15 | 0.01  |
| 5271 | SERPINB8  | 0.00  | 0.00  | 0.00  | 0.21  |
| 5272 | SERPINB9  | 0.00  | 0.00  | -0.10 | 0.04  |
| 5273 | SERPINB10 | -0.09 | 0.00  | -0.10 | -0.17 |
| 5274 | SERPINI1  | 0.00  | 0.00  | 0.00  | NaN   |
| 5275 | SERPINB13 | -0.09 | 0.00  | -0.15 | 0.34  |
| 5276 | SERPINI2  | 0.00  | 0.00  | 0.00  | NaN   |
| 5279 | PIGC      | 0.00  | 0.00  | 0.00  | NaN   |
| 5281 | PIGF      | 0.00  | 0.00  | 0.00  | NaN   |
| 5283 | PIGH      | 0.00  | 0.00  | 0.00  | NaN   |
| 5284 | PIGR      | 0.00  | 0.13  | 0.00  | -0.13 |
| 5287 | PIK3C2B   | 0.00  | 0.13  | 0.00  | 0.34  |
| 5288 | PIK3C2G   | 0.00  | 0.00  | 0.00  | NaN   |
| 5289 | PIK3C3    | 0.00  | -0.13 | -0.05 | 0.55  |
| 5290 | PIK3CA    | 0.09  | 0.00  | 0.05  | 0.65  |
| 5291 | PIK3CB    | 0.00  | 0.00  | 0.00  | NaN   |
| 5292 | PIM1      | 0.00  | 0.00  | 0.00  | NaN   |
| 5293 | PIK3CD    | 0.00  | 0.00  | 0.00  | NaN   |
| 5294 | PIK3CG    | 0.09  | 0.00  | 0.00  | 0.07  |
| 5295 | PIK3R1    | 0.00  | 0.00  | 0.00  | NaN   |
| 5296 | PIK3R2    | 0.00  | 0.00  | 0.00  | NaN   |
| 5297 | PIK4CA    | 0.00  | 0.13  | 0.05  | -0.10 |
| 5298 | PIK4CB    | 0.00  | 0.00  | 0.05  | 0.37  |
| 5300 | PIN1      | 0.00  | 0.00  | 1.00  | 0.51  |
| 5301 | PIN1L     | 0.00  | 0.00  | 0.00  | NaN   |

|      |          |       |       |       |       |
|------|----------|-------|-------|-------|-------|
| 5304 | PIP      | 0.00  | 0.00  | 0.00  | 0.01  |
| 5305 | PIP5K2A  | -0.09 | 0.00  | 0.05  | 0.10  |
| 5306 | PITPN    | 0.00  | -0.13 | 0.00  | 0.03  |
| 5307 | PITX1    | 0.00  | -0.13 | 0.00  | 0.12  |
| 5308 | PITX2    | 0.00  | 0.00  | 0.00  | NaN   |
| 5309 | PITX3    | 0.00  | 0.00  | 0.00  | -0.16 |
| 5310 | PKD1     | 0.00  | 0.13  | 0.00  | 0.05  |
| 5311 | PKD2     | 0.00  | 0.00  | 0.00  | NaN   |
| 5313 | PKLR     | 0.09  | 0.13  | 0.00  | -0.05 |
| 5315 | PKM2     | 0.00  | 0.00  | 0.00  | NaN   |
| 5316 | PKNOX1   | 0.00  | 0.13  | 0.00  | 0.36  |
| 5317 | PKP1     | 0.00  | 0.00  | 0.00  | NaN   |
| 5318 | PKP2     | 0.00  | 0.00  | 0.00  | NaN   |
| 5319 | PLA2G1B  | 0.00  | -0.13 | 0.00  | 0.05  |
| 5320 | PLA2G2A  | -0.09 | 0.00  | 0.00  | -0.27 |
| 5321 | PLA2G4A  | 0.00  | 0.00  | 0.00  | NaN   |
| 5322 | PLA2G5   | 0.00  | 0.00  | 0.00  | NaN   |
| 5324 | PLAG1    | 0.00  | 0.00  | 0.00  | NaN   |
| 5325 | PLAGL1   | 0.00  | 0.00  | 0.00  | NaN   |
| 5326 | PLAGL2   | 0.00  | 0.00  | 0.05  | 0.14  |
| 5327 | PLAT     | 0.36  | -0.13 | -0.05 | -0.11 |
| 5328 | PLAU     | 0.09  | 0.00  | 0.00  | -0.13 |
| 5329 | PLAUR    | 0.09  | 0.00  | -0.10 | 0.14  |
| 5330 | PLCB2    | 0.00  | 0.00  | 0.00  | NaN   |
| 5332 | PLCB4    | 0.00  | 0.00  | 0.00  | NaN   |
| 5333 | PLCD1    | 0.00  | 0.25  | 0.00  | 0.16  |
| 5334 | PLCL1    | 0.00  | 0.00  | 0.00  | NaN   |
| 5335 | PLCG1    | 0.18  | -0.13 | 0.00  | 0.26  |
| 5336 | PLCG2    | -0.09 | 0.00  | -0.05 | 0.10  |
| 5337 | PLD1     | 0.09  | 0.00  | 0.00  | 0.25  |
| 5338 | PLD2     | 0.00  | 0.00  | 0.00  | NaN   |
| 5339 | PLEC1    | 0.18  | 0.00  | 0.10  | 0.10  |
| 5340 | PLG      | 0.00  | 0.00  | 0.00  | NaN   |
| 5341 | PLEK     | 0.00  | 0.00  | 0.00  | NaN   |
| 5342 | PLGL     | 0.00  | 0.50  | 0.00  | 0.23  |
| 5345 | SERPINF2 | 0.00  | -0.13 | 0.00  | -0.03 |
| 5346 | PLIN     | 0.00  | 0.00  | 0.00  | NaN   |
| 5347 | PLK      | 0.00  | 0.00  | -0.05 | 0.16  |
| 5348 | FXYD1    | 0.00  | 0.00  | 0.00  | NaN   |
| 5349 | FXYD3    | 0.00  | 0.00  | 0.00  | NaN   |
| 5350 | PLN      | -0.09 | 0.00  | 0.05  | 0.14  |
| 5351 | PLOD     | 0.00  | 0.00  | 0.00  | NaN   |
| 5352 | PLOD2    | 0.00  | 0.00  | -0.05 | 0.27  |
| 5357 | PLS1     | 0.00  | 0.00  | -0.05 | 0.09  |
| 5359 | PLSCR1   | 0.00  | 0.00  | -0.05 | 0.30  |
| 5360 | PLTP     | 0.00  | 0.00  | 0.00  | NaN   |
| 5361 | PLXNA1   | 0.00  | 0.00  | 0.00  | NaN   |



|      |          |       |       |       |       |
|------|----------|-------|-------|-------|-------|
| 5362 | PLXNA2   | 0.00  | 0.13  | 0.00  | -0.11 |
| 5364 | PLXNB1   | -0.09 | 0.00  | -0.05 | 0.24  |
| 5366 | PMAIP1   | 0.00  | 0.00  | -0.20 | 0.24  |
| 5367 | PMCH     | 0.00  | 0.00  | 0.00  | NaN   |
| 5368 | PNOC     | -0.09 | -0.50 | -0.10 | -0.29 |
| 5371 | PML      | 0.00  | 0.00  | 0.00  | NaN   |
| 5372 | PMM1     | 0.00  | 0.00  | 0.05  | 0.28  |
| 5373 | PMM2     | 0.00  | 0.00  | 0.00  | NaN   |
| 5375 | PMP2     | 0.00  | 0.00  | 0.05  | 0.01  |
| 5376 | PMP22    | 0.00  | 0.00  | 0.00  | NaN   |
| 5378 | PMS1     | 0.00  | 0.00  | 0.00  | NaN   |
| 5379 | PMS2L1   | 0.18  | 0.00  | 0.00  | 0.35  |
| 5380 | PMS2L2   | -0.09 | 0.00  | 0.00  | -0.16 |
| 5382 | PMS2L4   | 0.00  | 0.00  | 0.05  | 0.26  |
| 5387 | PMS2L9   | -0.09 | 0.00  | 0.00  | -0.21 |
| 5393 | PMSCL1   | 0.00  | 0.00  | 0.00  | NaN   |
| 5394 | PMSCL2   | 0.00  | 0.00  | 0.00  | NaN   |
| 5395 | PMS2     | 0.00  | 0.00  | 1.00  | 0.48  |
| 5396 | PMX1     | 0.00  | 0.00  | 0.00  | NaN   |
| 5406 | PNLIP    | 0.00  | 0.00  | -0.05 | 0.06  |
| 5407 | PNLIPRP1 | 0.00  | 0.00  | -0.05 | 0.01  |
| 5408 | PNLIPRP2 | 0.00  | 0.00  | -0.05 | 0.01  |
| 5409 | PNMT     | 0.00  | 1.00  | 0.00  | 0.42  |
| 5411 | PNN      | 0.00  | 0.00  | 0.00  | NaN   |
| 5412 | UBL3     | 0.00  | 0.00  | -0.05 | 0.20  |
| 5413 | PNUTL1   | 0.00  | 0.00  | 0.00  | 0.24  |
| 5414 | PNUTL2   | 0.09  | 0.00  | 0.00  | -0.08 |
| 5420 | PODXL    | 0.00  | 0.25  | 0.00  | -0.20 |
| 5423 | POLB     | 0.36  | 0.13  | 0.00  | 0.62  |
| 5424 | POLD1    | 0.00  | 0.00  | 0.00  | NaN   |
| 5425 | POLD2    | 0.00  | 0.00  | 0.00  | NaN   |
| 5426 | POLE     | 0.00  | 0.00  | 0.00  | NaN   |
| 5427 | POLE2    | 0.00  | 0.00  | 0.00  | NaN   |
| 5428 | POLG     | 0.00  | 0.00  | -0.05 | 0.38  |
| 5429 | POLH     | 0.00  | 0.00  | 0.00  | NaN   |
| 5430 | POLR2A   | 0.00  | 0.00  | 0.00  | NaN   |
| 5431 | POLR2B   | 0.00  | 0.00  | 0.00  | NaN   |
| 5432 | POLR2C   | -0.09 | 0.00  | 0.00  | 0.40  |
| 5433 | POLR2D   | 0.00  | 0.00  | 0.00  | 0.41  |
| 5434 | POLR2E   | 0.00  | 0.00  | 0.00  | NaN   |
| 5435 | POLR2F   | 0.00  | 0.00  | 0.05  | 0.38  |
| 5436 | POLR2G   | 0.00  | 0.00  | 0.00  | NaN   |
| 5437 | POLR2H   | 0.09  | 0.00  | 0.00  | 0.49  |
| 5438 | POLR2I   | 0.00  | 0.00  | 0.00  | NaN   |
| 5439 | POLR2J   | 0.18  | 0.00  | 0.00  | 0.54  |
| 5440 | POLR2K   | 0.09  | 0.00  | 0.05  | 0.24  |
| 5441 | POLR2L   | -0.18 | -0.13 | -0.05 | 0.51  |

|      |         |       |       |       |       |
|------|---------|-------|-------|-------|-------|
| 5442 | POLRMT  | 0.00  | 0.00  | -0.05 | 0.24  |
| 5443 | POMC    | 0.09  | 0.00  | 0.00  | -0.01 |
| 5444 | PON1    | 0.18  | 0.00  | 0.00  | 0.22  |
| 5445 | PON2    | 0.18  | 0.00  | 0.00  | 0.34  |
| 5446 | PON3    | 0.18  | 0.00  | 0.00  | -0.01 |
| 5447 | POR     | -0.09 | 0.00  | 0.00  | 0.39  |
| 5449 | POU1F1  | -0.09 | 0.00  | 0.05  | 0.11  |
| 5450 | POU2AF1 | 0.00  | 0.00  | 0.00  | NaN   |
| 5451 | POU2F1  | 0.00  | 0.00  | 0.00  | NaN   |
| 5452 | POU2F2  | 0.00  | 0.00  | -0.05 | 0.13  |
| 5453 | POU3F1  | 0.00  | 0.00  | 0.00  | NaN   |
| 5454 | POU3F2  | 0.00  | 0.00  | 0.00  | NaN   |
| 5455 | POU3F3  | 0.00  | 0.00  | 0.00  | NaN   |
| 5457 | POU4F1  | -0.09 | 0.13  | -0.10 | 0.09  |
| 5458 | POU4F2  | 0.00  | 0.00  | -0.05 | 0.19  |
| 5459 | POU4F3  | 0.00  | 0.00  | 0.00  | NaN   |
| 5460 | POU5F1  | 0.00  | 0.00  | 0.00  | NaN   |
| 5463 | POU6F1  | 0.00  | 0.00  | 0.00  | NaN   |
| 5464 | PP      | 0.00  | 0.00  | 0.00  | NaN   |
| 5465 | PPARA   | 0.00  | 0.00  | 0.00  | NaN   |
| 5467 | PPARD   | 0.00  | 0.00  | 0.00  | NaN   |
| 5468 | PPARG   | 0.09  | 0.00  | 0.00  | -0.13 |
| 5469 | PPARBP  | 0.00  | 0.75  | 0.00  | 0.82  |
| 5470 | PPEF2   | 0.00  | 0.00  | 0.00  | NaN   |
| 5471 | PPAT    | 0.00  | 0.00  | 0.00  | NaN   |
| 5473 | PPBP    | 0.00  | 0.00  | 0.00  | NaN   |
| 5476 | PPGB    | 0.00  | 0.00  | 0.00  | NaN   |
| 5478 | PPIA    | 0.00  | 0.00  | 0.00  | NaN   |
| 5479 | PPIB    | 0.00  | 0.00  | 0.00  | NaN   |
| 5480 | PPIC    | 0.00  | 0.00  | 0.00  | NaN   |
| 5481 | PPID    | 0.00  | 0.00  | 0.00  | 0.43  |
| 5493 | PPL     | 0.00  | 0.00  | -0.05 | 0.29  |
| 5494 | PPM1A   | 0.00  | 0.00  | 0.00  | NaN   |
| 5495 | PPM1B   | 0.00  | 0.00  | 0.00  | NaN   |
| 5496 | PPM1G   | 0.09  | 0.00  | 0.05  | 0.42  |
| 5499 | PPP1CA  | 0.36  | 0.00  | 0.05  | 0.68  |
| 5500 | PPP1CB  | 0.00  | 0.00  | 0.00  | NaN   |
| 5501 | PPP1CC  | 0.00  | 0.00  | 0.00  | NaN   |
| 5502 | PPP1R1A | 0.00  | 0.00  | 0.00  | NaN   |
| 5504 | PPP1R2  | 0.18  | 0.00  | 0.00  | 0.55  |
| 5506 | PPP1R3A | 0.09  | 0.00  | 0.00  | -0.02 |
| 5507 | PPP1R3C | 0.00  | 0.00  | 0.00  | NaN   |
| 5509 | PPP1R3D | 0.18  | 0.25  | 0.00  | 0.35  |
| 5510 | PPP1R7  | 0.00  | 0.00  | -0.05 | 0.44  |
| 5511 | PPP1R8  | 0.00  | 0.00  | 0.00  | NaN   |
| 5514 | PPP1R10 | 0.00  | 0.00  | 0.00  | NaN   |
| 5515 | PPP2CA  | 0.00  | -0.13 | 0.00  | 0.44  |

|      |         |       |       |       |       |
|------|---------|-------|-------|-------|-------|
| 5516 | PPP2CB  | -0.09 | -0.25 | -0.05 | 0.55  |
| 5518 | PPP2R1A | 0.00  | 0.00  | -0.05 | 0.33  |
| 5519 | PPP2R1B | 0.00  | 0.00  | 0.00  | NaN   |
| 5520 | PPP2R2A | -0.09 | -0.25 | -0.05 | 0.51  |
| 5521 | PPP2R2B | 0.00  | 0.00  | 0.00  | NaN   |
| 5523 | PPP2R3A | 0.00  | 0.00  | 0.00  | NaN   |
| 5524 | PPP2R4  | 0.00  | 0.00  | 0.00  | NaN   |
| 5525 | PPP2R5A | 0.00  | 0.00  | 0.00  | NaN   |
| 5526 | PPP2R5B | 0.00  | 0.00  | 0.00  | NaN   |
| 5527 | PPP2R5C | 0.00  | 0.00  | 0.00  | NaN   |
| 5528 | PPP2R5D | 0.00  | 0.00  | 0.00  | NaN   |
| 5529 | PPP2R5E | 0.00  | 0.00  | -0.05 | 0.70  |
| 5530 | PPP3CA  | 0.00  | 0.00  | 0.00  | NaN   |
| 5531 | PPP4C   | 0.00  | 0.00  | 0.00  | NaN   |
| 5532 | PPP3CB  | 0.09  | 0.00  | 0.00  | 0.56  |
| 5533 | PPP3CC  | -0.09 | -0.25 | -0.10 | 0.37  |
| 5534 | PPP3R1  | 0.00  | 0.00  | 0.00  | NaN   |
| 5536 | PPP5C   | 0.09  | 0.00  | 0.00  | 0.17  |
| 5537 | PPP6C   | 0.00  | 0.00  | 0.00  | NaN   |
| 5538 | PPT1    | 0.00  | 0.00  | 0.00  | NaN   |
| 5539 | PPY     | 0.00  | -0.13 | 0.00  | -0.25 |
| 5540 | PPYR1   | 0.00  | 0.00  | -0.05 | 0.05  |
| 5542 | PRB1    | 0.00  | 0.00  | 0.10  | 0.12  |
| 5544 | PRB3    | -0.09 | 0.00  | 0.05  | -0.22 |
| 5546 | PRCC    | 0.00  | 0.13  | 0.00  | -0.12 |
| 5547 | PRCP    | 0.00  | 0.00  | 0.05  | 0.23  |
| 5549 | PRELP   | 0.00  | 0.25  | 0.00  | 0.05  |
| 5550 | PREP    | 0.00  | 0.00  | 0.10  | 0.64  |
| 5551 | PRF1    | 0.00  | 0.00  | 0.00  | NaN   |
| 5552 | PRG1    | 0.50  | 0.00  | 0.00  | 0.03  |
| 5553 | PRG2    | 0.00  | 0.00  | 0.00  | NaN   |
| 5554 | PRH1    | -0.09 | 0.00  | 0.00  | 0.33  |
| 5557 | PRIM1   | 0.00  | 0.00  | 0.00  | NaN   |
| 5558 | PRIM2A  | 0.00  | 0.13  | 0.00  | -0.08 |
| 5563 | PRKAA2  | 0.00  | 0.00  | -0.05 | -0.26 |
| 5564 | PRKAB1  | 0.00  | -0.13 | 0.00  | 0.17  |
| 5565 | PRKAB2  | 0.00  | 0.00  | 0.05  | -0.05 |
| 5566 | PRKACA  | 0.00  | 0.00  | 0.00  | NaN   |
| 5567 | PRKACB  | 0.00  | 0.00  | 0.05  | 0.34  |
| 5568 | PRKACG  | 0.00  | 0.00  | -0.05 | -0.11 |
| 5569 | PKIA    | 0.00  | 0.25  | 0.05  | 0.17  |
| 5571 | PRKAG1  | 0.00  | 0.00  | 0.00  | NaN   |
| 5573 | PRKAR1A | 0.18  | 0.13  | 0.00  | 0.43  |
| 5575 | PRKAR1B | 0.00  | 0.13  | 0.05  | 0.14  |
| 5576 | PRKAR2A | -0.09 | 0.00  | -0.05 | 0.30  |
| 5577 | PRKAR2B | 0.09  | 0.00  | 0.00  | 0.02  |
| 5578 | PRKCA   | 0.18  | 0.13  | 0.00  | 0.08  |

|      |         |       |       |       |       |
|------|---------|-------|-------|-------|-------|
| 5579 | PRKCB1  | 0.00  | 0.00  | 0.00  | NaN   |
| 5580 | PRKCD   | 0.00  | 0.00  | -0.05 | 0.34  |
| 5581 | PRKCE   | 0.00  | 0.00  | 0.00  | NaN   |
| 5582 | PRKCG   | 0.09  | 0.00  | 0.00  | -0.07 |
| 5583 | PRKCH   | 0.00  | 0.00  | 0.00  | NaN   |
| 5584 | PRKCI   | 0.09  | 0.00  | 0.00  | 0.23  |
| 5585 | PRKCL1  | 0.00  | 0.00  | 0.00  | NaN   |
| 5586 | PRKCL2  | 0.00  | 0.00  | 0.00  | NaN   |
| 5587 | PRKCM   | 0.00  | 0.00  | 0.00  | NaN   |
| 5588 | PRKCQ   | 0.00  | 0.00  | 0.00  | NaN   |
| 5589 | PRKCSH  | 0.00  | 0.00  | 0.00  | NaN   |
| 5590 | PRKCZ   | 0.00  | 0.00  | 0.00  | NaN   |
| 5591 | PRKDC   | 0.00  | 0.00  | 0.00  | NaN   |
| 5592 | PRKG1   | 0.00  | 0.00  | 0.00  | NaN   |
| 5593 | PRKG2   | 0.00  | 0.00  | 0.00  | NaN   |
| 5594 | MAPK1   | 0.00  | 0.00  | 0.00  | NaN   |
| 5595 | MAPK3   | 0.00  | 0.00  | 0.00  | NaN   |
| 5596 | MAPK4   | -0.09 | -0.13 | -0.25 | 0.07  |
| 5597 | MAPK6   | 0.18  | 0.00  | 0.00  | 0.47  |
| 5598 | MAPK7   | 0.00  | 0.00  | 0.00  | NaN   |
| 5599 | MAPK8   | 0.00  | -0.13 | 0.00  | 0.18  |
| 5600 | MAPK11  | 0.00  | -0.25 | 0.00  | 0.09  |
| 5601 | MAPK9   | 0.00  | 0.13  | 0.00  | 0.41  |
| 5602 | MAPK10  | 0.00  | 0.00  | 0.00  | NaN   |
| 5603 | MAPK13  | 0.00  | 0.00  | 0.00  | NaN   |
| 5604 | MAP2K1  | 0.00  | 0.00  | 0.00  | NaN   |
| 5605 | MAP2K2  | 0.00  | 0.00  | 0.00  | NaN   |
| 5606 | MAP2K3  | 0.00  | -0.13 | 0.00  | 0.20  |
| 5607 | MAP2K5  | 0.00  | 0.00  | 0.00  | NaN   |
| 5608 | MAP2K6  | 0.00  | 0.13  | 0.00  | 0.56  |
| 5609 | MAP2K7  | 0.00  | 0.00  | 0.00  | NaN   |
| 5610 | PRKR    | 0.00  | 0.00  | 0.50  | 0.37  |
| 5611 | DNAJC3  | -0.09 | 0.00  | -0.05 | -0.05 |
| 5612 | PRKRIR  | 0.27  | 0.00  | 0.00  | 0.62  |
| 5617 | PRL     | 0.00  | 0.00  | 0.00  | NaN   |
| 5618 | PRLR    | 0.00  | 0.00  | 0.15  | -0.10 |
| 5619 | PRM1    | 0.00  | 0.00  | 0.00  | NaN   |
| 5620 | PRM2    | 0.00  | 0.00  | 0.00  | NaN   |
| 5621 | PRNP    | 0.00  | 0.00  | 0.00  | NaN   |
| 5623 | PSPN    | 0.00  | 0.00  | 0.00  | NaN   |
| 5624 | PROC    | 0.00  | 0.00  | -0.05 | -0.06 |
| 5625 | PRODH   | 0.50  | 0.00  | 0.50  | -0.07 |
| 5626 | PROP1   | 0.00  | 0.00  | 0.00  | NaN   |
| 5627 | PROS1   | -0.09 | 0.00  | 0.00  | 0.12  |
| 5629 | PROX1   | 0.00  | 0.00  | 0.00  | NaN   |
| 5630 | PRPH    | 0.00  | 0.00  | 0.00  | NaN   |
| 5635 | PRPSAP1 | 0.00  | 0.13  | 0.00  | 0.38  |

|      |         |       |       |       |       |
|------|---------|-------|-------|-------|-------|
| 5636 | PRPSAP2 | 0.00  | 0.00  | 0.00  | NaN   |
| 5639 | PRRG2   | 0.00  | 0.00  | 0.00  | NaN   |
| 5641 | LGMN    | 0.00  | 0.00  | 0.00  | NaN   |
| 5644 | PRSS1   | 0.00  | 0.00  | -0.05 | 0.10  |
| 5645 | PRSS2   | 0.00  | 0.00  | -0.05 | -0.45 |
| 5646 | PRSS3   | -0.09 | 0.00  | 0.10  | 0.13  |
| 5648 | MASP1   | 0.00  | 0.00  | 0.10  | 0.08  |
| 5649 | RELN    | 0.09  | 0.00  | 0.00  | 0.07  |
| 5650 | KLK7    | 0.00  | 0.00  | 0.00  | NaN   |
| 5651 | PRSS7   | 0.00  | -0.13 | 0.00  | 0.02  |
| 5652 | PRSS8   | 0.00  | 0.00  | 0.00  | NaN   |
| 5653 | KLK6    | 0.00  | 0.00  | 0.00  | NaN   |
| 5654 | PRSS11  | 0.00  | 0.00  | -0.05 | 0.10  |
| 5655 | KLK10   | 0.00  | 0.00  | 0.00  | NaN   |
| 5657 | PRTN3   | 0.00  | 0.00  | 0.05  | -0.02 |
| 5660 | PSAP    | 0.09  | 0.00  | 0.00  | 0.08  |
| 5662 | PSD     | 0.00  | -0.13 | -0.05 | -0.23 |
| 5663 | PSEN1   | 0.00  | 0.00  | 0.00  | NaN   |
| 5664 | PSEN2   | 0.09  | 0.00  | 0.00  | 0.22  |
| 5669 | PSG1    | 0.50  | 0.00  | 0.00  | 0.07  |
| 5670 | PSG2    | 0.09  | -0.13 | -0.05 | 0.03  |
| 5671 | PSG3    | 0.09  | 0.00  | -0.05 | 0.20  |
| 5672 | PSG4    | 1.00  | 0.00  | 0.50  | 0.19  |
| 5673 | PSG5    | 0.00  | -0.13 | -0.05 | 0.01  |
| 5675 | PSG6    | 1.00  | 0.00  | 0.00  | 0.27  |
| 5676 | PSG7    | 0.00  | 0.00  | -0.05 | 0.14  |
| 5678 | PSG9    | 0.00  | -0.13 | -0.05 | 0.06  |
| 5682 | PSMA1   | 0.00  | 0.00  | 0.00  | NaN   |
| 5683 | PSMA2   | 0.00  | 0.00  | 0.00  | NaN   |
| 5684 | PSMA3   | 0.00  | 0.00  | 0.05  | 0.19  |
| 5685 | PSMA4   | 0.00  | 0.00  | 0.00  | NaN   |
| 5686 | PSMA5   | 0.09  | 0.00  | 0.05  | 0.53  |
| 5687 | PSMA6   | 0.00  | 0.00  | 0.00  | NaN   |
| 5688 | PSMA7   | 0.09  | 0.13  | 0.00  | 0.27  |
| 5689 | PSMB1   | 0.00  | 0.00  | 0.00  | NaN   |
| 5690 | PSMB2   | 0.00  | 0.00  | 0.00  | NaN   |
| 5691 | PSMB3   | 0.00  | 0.38  | 0.00  | 0.76  |
| 5692 | PSMB4   | 0.00  | 0.00  | 0.05  | 0.27  |
| 5693 | PSMB5   | 0.00  | 0.00  | 0.00  | NaN   |
| 5694 | PSMB6   | 0.00  | 0.00  | 0.00  | NaN   |
| 5695 | PSMB7   | 0.00  | 0.00  | 0.00  | NaN   |
| 5696 | PSMB8   | 0.09  | 0.00  | 0.00  | -0.04 |
| 5697 | PYY     | 0.00  | -0.13 | 0.00  | 0.15  |
| 5698 | PSMB9   | 0.09  | 0.00  | 0.00  | -0.07 |
| 5699 | PSMB10  | -0.09 | -0.13 | 0.00  | 0.29  |
| 5700 | PSMC1   | 0.00  | 0.13  | 0.00  | 0.17  |
| 5702 | PSMC3   | 0.00  | -0.13 | 0.00  | 0.24  |

|      |        |       |       |       |       |
|------|--------|-------|-------|-------|-------|
| 5704 | PSMC4  | 0.00  | 0.00  | 0.00  | NaN   |
| 5705 | PSMC5  | 0.27  | 0.13  | 0.00  | 0.66  |
| 5706 | PSMC6  | 0.00  | 0.00  | 0.05  | 0.05  |
| 5707 | PSMD1  | 0.00  | 0.00  | 0.00  | NaN   |
| 5708 | PSMD2  | 0.09  | 0.00  | 0.00  | 0.26  |
| 5709 | PSMD3  | 0.00  | 0.63  | 0.00  | 0.79  |
| 5710 | PSMD4  | 0.00  | 0.00  | 0.05  | 0.22  |
| 5711 | PSMD5  | 0.00  | 0.00  | 0.00  | NaN   |
| 5713 | PSMD7  | 0.00  | 0.00  | 0.05  | 0.21  |
| 5714 | PSMD8  | 0.00  | 0.00  | 0.00  | NaN   |
| 5715 | PSMD9  | 0.00  | -0.13 | 0.00  | 0.33  |
| 5717 | PSMD11 | 0.00  | 0.00  | 0.00  | NaN   |
| 5718 | PSMD12 | 0.18  | 0.13  | 0.00  | 0.51  |
| 5719 | PSMD13 | -0.27 | -0.13 | -0.10 | 0.48  |
| 5720 | PSME1  | 0.00  | 0.00  | 0.00  | NaN   |
| 5721 | PSME2  | 0.00  | 0.00  | 0.00  | NaN   |
| 5723 | PSPH   | 0.00  | 0.00  | 0.10  | 0.83  |
| 5724 | PTAFR  | 0.00  | 0.00  | 0.00  | NaN   |
| 5725 | PTBP1  | 0.00  | 0.00  | 0.00  | NaN   |
| 5727 | PTCH   | 0.00  | 0.00  | 0.00  | NaN   |
| 5728 | PTEN   | 0.50  | 0.00  | 0.50  | 0.42  |
| 5729 | PTGDR  | 0.00  | 0.13  | 0.05  | 0.35  |
| 5730 | PTGDS  | 0.00  | 0.00  | 0.00  | NaN   |
| 5731 | PTGER1 | 0.00  | 0.00  | 0.00  | NaN   |
| 5732 | PTGER2 | 0.00  | 0.13  | 0.05  | -0.05 |
| 5733 | PTGER3 | 0.00  | 0.00  | 0.00  | NaN   |
| 5734 | PTGER4 | 0.00  | 0.00  | 0.10  | -0.10 |
| 5737 | PTGFR  | 0.00  | 0.00  | 0.00  | NaN   |
| 5739 | PTGIR  | 0.09  | 0.00  | 0.00  | 0.18  |
| 5740 | PTGIS  | 0.09  | 0.25  | 0.05  | 0.10  |
| 5741 | PTH    | 0.00  | 0.00  | 0.00  | NaN   |
| 5742 | PTGS1  | 0.00  | 0.00  | 0.00  | NaN   |
| 5743 | PTGS2  | 0.00  | 0.00  | 0.00  | NaN   |
| 5744 | PTHLH  | 0.00  | 0.00  | 0.00  | NaN   |
| 5745 | PTHR1  | -0.09 | 0.00  | -0.05 | -0.08 |
| 5746 | PTHR2  | 0.00  | 0.00  | 0.00  | NaN   |
| 5747 | PTK2   | 0.18  | -0.13 | 0.05  | 0.57  |
| 5753 | PTK6   | 0.09  | 0.00  | 0.00  | 0.19  |
| 5754 | PTK7   | 0.00  | 0.00  | 0.00  | NaN   |
| 5756 | PTK9   | 0.00  | 0.13  | 0.00  | 0.46  |
| 5757 | PTMA   | 0.00  | 0.00  | 0.00  | NaN   |
| 5763 | PTMS   | -0.09 | 0.00  | 0.00  | 0.26  |
| 5764 | PTN    | 0.00  | 0.00  | -0.05 | 0.13  |
| 5768 | QSCN6  | 0.00  | 0.00  | 0.00  | NaN   |
| 5770 | PTPN1  | 0.27  | 0.25  | 0.05  | 0.41  |
| 5771 | PTPN2  | 0.00  | 0.00  | 0.00  | NaN   |
| 5774 | PTPN3  | 0.00  | 0.00  | 0.00  | NaN   |

|      |         |       |       |       |       |
|------|---------|-------|-------|-------|-------|
| 5775 | PTPN4   | 0.00  | 0.00  | 0.00  | NaN   |
| 5777 | PTPN6   | 0.00  | 0.00  | 0.00  | 0.38  |
| 5778 | PTPN7   | 0.00  | 0.13  | 0.00  | -0.26 |
| 5780 | PTPN9   | 0.00  | 0.00  | 0.00  | NaN   |
| 5781 | PTPN11  | 0.00  | 0.00  | 0.00  | NaN   |
| 5782 | PTPN12  | -0.09 | 0.00  | 0.00  | 0.32  |
| 5783 | PTPN13  | 0.00  | 0.00  | 0.00  | NaN   |
| 5784 | PTPN14  | 0.00  | 0.00  | 0.00  | NaN   |
| 5786 | PTPRA   | 0.00  | 0.00  | 0.05  | 0.26  |
| 5787 | PTPRB   | 0.09  | 0.00  | 0.00  | -0.06 |
| 5788 | PTPRC   | 0.09  | 0.00  | 0.00  | 0.02  |
| 5789 | PTPRD   | 0.00  | -0.13 | 0.00  | -0.06 |
| 5790 | PTPRCAP | 0.36  | 0.00  | 0.05  | 0.25  |
| 5791 | PTPRE   | 0.00  | 0.00  | -0.05 | 0.03  |
| 5792 | PTPRF   | 0.00  | 0.00  | 0.00  | NaN   |
| 5793 | PTPRG   | -0.09 | 0.00  | -0.10 | 0.17  |
| 5794 | PTPRH   | 0.09  | 0.00  | 0.00  | 0.05  |
| 5795 | PTPRJ   | 0.00  | 0.00  | 0.05  | 0.09  |
| 5796 | PTPRK   | 0.00  | 0.00  | 0.05  | 0.36  |
| 5797 | PTPRM   | 0.00  | 0.00  | 0.00  | NaN   |
| 5798 | PTPRN   | 0.00  | 0.00  | 0.00  | NaN   |
| 5799 | PTPRN2  | 0.00  | 0.00  | -0.05 | 0.23  |
| 5801 | PTPRR   | 0.50  | 0.50  | 0.00  | -0.07 |
| 5802 | PTPRS   | 0.00  | 0.00  | 0.00  | NaN   |
| 5803 | PTPRZ1  | 0.00  | 0.13  | 0.00  | -0.05 |
| 5805 | PTS     | 0.00  | 0.00  | 0.00  | NaN   |
| 5813 | PURA    | 0.00  | 0.00  | 0.00  | NaN   |
| 5817 | PVR     | 0.09  | 0.00  | 0.00  | 0.29  |
| 5818 | PVRL1   | -0.09 | 0.00  | -0.10 | 0.29  |
| 5819 | PVRL2   | 0.09  | 0.00  | 0.00  | -0.22 |
| 5822 | PWP2H   | 0.00  | 0.00  | 0.00  | NaN   |
| 5824 | PXF     | 0.00  | 0.00  | 0.00  | NaN   |
| 5825 | ABCD3   | 0.09  | 0.00  | 0.05  | 0.56  |
| 5826 | ABCD4   | 0.00  | 0.00  | 0.00  | NaN   |
| 5827 | PXMP2   | 0.00  | 0.00  | 0.00  | NaN   |
| 5828 | PXMP3   | 0.00  | 0.50  | 0.00  | 0.42  |
| 5829 | PXN     | 0.00  | -0.13 | 0.00  | 0.29  |
| 5830 | PXR1    | 0.00  | 0.00  | 0.00  | 0.35  |
| 5831 | PYCR1   | 0.00  | 0.00  | 0.05  | -0.06 |
| 5832 | PYCS    | 0.00  | 0.00  | -0.05 | 0.37  |
| 5833 | PCYT2   | 0.00  | 0.00  | 0.00  | NaN   |
| 5834 | PYGB    | 0.00  | 0.00  | -0.05 | 0.26  |
| 5836 | PYGL    | 0.00  | 0.00  | 0.05  | 0.19  |
| 5837 | PYGM    | 0.00  | 0.00  | 0.00  | NaN   |
| 5858 | PZP     | -0.09 | 0.00  | 0.00  | -0.17 |
| 5860 | QDPR    | 0.00  | 0.00  | -0.05 | 0.17  |
| 5861 | RAB1A   | 0.00  | 0.00  | 0.00  | NaN   |

|      |          |       |       |       |       |
|------|----------|-------|-------|-------|-------|
| 5862 | RAB2     | 0.00  | 0.00  | 0.00  | NaN   |
| 5863 | RAB2L    | 0.09  | 0.00  | 0.00  | 0.14  |
| 5864 | RAB3A    | 0.00  | 0.00  | 0.00  | NaN   |
| 5865 | RAB3B    | 0.00  | 0.00  | 0.00  | NaN   |
| 5866 | RAB3IL1  | -0.09 | 0.00  | 0.00  | 0.03  |
| 5867 | RAB4A    | 0.09  | 0.00  | 0.00  | 0.33  |
| 5868 | RAB5A    | 0.00  | 0.00  | 0.00  | NaN   |
| 5869 | RAB5B    | 0.00  | 0.00  | 0.00  | NaN   |
| 5870 | RAB6A    | 0.50  | 0.50  | 0.00  | 0.63  |
| 5871 | MAP4K2   | 0.00  | 0.00  | 0.00  | NaN   |
| 5872 | RAB13    | 0.09  | 0.13  | 0.00  | 0.32  |
| 5873 | RAB27A   | 0.00  | 0.00  | 0.05  | 0.61  |
| 5874 | RAB27B   | -0.09 | 0.00  | -0.20 | 0.28  |
| 5875 | RABGGTA  | 0.00  | 0.00  | 0.00  | NaN   |
| 5876 | RABGGTB  | 0.00  | 0.00  | 0.00  | NaN   |
| 5877 | RABIF    | 0.09  | 0.13  | 0.00  | 0.17  |
| 5878 | RAB5C    | 0.00  | 0.13  | 0.00  | 0.51  |
| 5879 | RAC1     | 0.00  | 0.00  | 0.10  | 0.57  |
| 5880 | RAC2     | 0.00  | 0.00  | 0.00  | NaN   |
| 5881 | RAC3     | 0.00  | 0.00  | 0.05  | -0.01 |
| 5883 | RAD9     | 0.45  | 0.00  | 0.05  | 0.45  |
| 5884 | RAD17    | 0.00  | 0.00  | 0.00  | NaN   |
| 5885 | RAD21    | 0.09  | 0.38  | 0.10  | 0.50  |
| 5886 | RAD23A   | 0.00  | 0.00  | 0.00  | NaN   |
| 5887 | RAD23B   | 0.00  | 0.00  | 0.00  | NaN   |
| 5888 | RAD51    | 0.00  | 0.00  | 0.00  | NaN   |
| 5889 | RAD51C   | 0.18  | 0.13  | 0.00  | 0.76  |
| 5890 | RAD51L1  | 0.00  | 0.00  | -0.05 | 0.31  |
| 5892 | RAD51L3  | 0.00  | -0.13 | 0.00  | 0.33  |
| 5893 | RAD52    | 0.00  | 0.00  | 0.05  | 0.10  |
| 5894 | RAF1     | 0.00  | 0.00  | 0.00  | NaN   |
| 5896 | RAG1     | 0.00  | 0.13  | 0.05  | 0.39  |
| 5897 | RAG2     | 0.00  | 0.13  | 0.05  | -0.12 |
| 5898 | RALA     | 0.00  | 0.00  | 0.00  | NaN   |
| 5899 | RALB     | 0.00  | 0.00  | 0.00  | NaN   |
| 5900 | RALGDS   | 0.00  | 0.00  | 0.00  | NaN   |
| 5901 | RAN      | 0.00  | 0.00  | 0.00  | NaN   |
| 5902 | RANBP1   | -0.09 | 0.00  | 0.00  | 0.30  |
| 5903 | RANBP2   | 0.00  | 0.00  | 0.00  | NaN   |
| 5905 | RANGAP1  | 0.00  | 0.00  | 0.05  | 0.23  |
| 5906 | RAP1A    | 0.09  | 0.00  | 0.00  | 0.38  |
| 5909 | RAP1GA1  | -0.09 | 0.00  | 0.00  | -0.28 |
| 5910 | RAP1GDS1 | 0.00  | 0.00  | 0.00  | NaN   |
| 5911 | RAP2A    | -0.09 | 0.00  | -0.05 | 0.08  |
| 5912 | RAP2B    | 0.00  | 0.00  | 0.00  | NaN   |
| 5913 | RAPSN    | 0.00  | 0.00  | 0.00  | NaN   |
| 5914 | RARA     | 0.00  | 0.38  | 0.00  | 0.65  |



|      |         |       |       |       |       |
|------|---------|-------|-------|-------|-------|
| 5915 | RARB    | 0.00  | 0.00  | 0.00  | NaN   |
| 5916 | RARG    | 0.00  | 0.00  | 0.00  | NaN   |
| 5917 | RARS    | 0.00  | 0.00  | 0.00  | NaN   |
| 5918 | RARRES1 | 0.00  | 0.00  | 0.00  | NaN   |
| 5919 | RARRES2 | 0.00  | 0.00  | -0.05 | 0.19  |
| 5920 | RARRES3 | 0.00  | 0.00  | 0.00  | NaN   |
| 5921 | RASA1   | 0.00  | -0.13 | 0.00  | 0.26  |
| 5922 | RASA2   | 0.00  | 0.00  | 0.00  | NaN   |
| 5923 | RASGRF1 | 0.00  | 0.00  | 0.00  | NaN   |
| 5925 | RB1     | 0.00  | 0.00  | 0.00  | NaN   |
| 5926 | RBBP1   | 0.00  | 0.00  | 0.50  | 0.31  |
| 5927 | RBBP2   | 0.00  | 0.00  | 0.50  | 0.32  |
| 5928 | RBBP4   | 0.00  | 0.00  | 0.00  | NaN   |
| 5929 | RBBP5   | 0.00  | 0.13  | 0.00  | 0.45  |
| 5930 | RBBP6   | 0.00  | 0.00  | 0.00  | NaN   |
| 5932 | RBBP8   | 0.00  | 0.00  | -0.10 | 0.32  |
| 5934 | RBL2    | 0.18  | 0.00  | 0.00  | 0.56  |
| 5936 | RBM4    | 0.00  | 0.00  | 0.05  | -0.06 |
| 5937 | RBMS1   | 0.00  | 0.00  | -0.10 | 0.50  |
| 5939 | RBMS2   | 0.00  | 0.00  | 0.00  | NaN   |
| 5955 | RCN2    | 0.00  | 0.00  | 0.00  | NaN   |
| 5957 | RCV1    | 0.00  | 0.00  | 0.00  | NaN   |
| 5959 | RDH5    | 0.00  | 0.00  | 0.00  | NaN   |
| 5961 | RDS     | 0.00  | 0.00  | 0.00  | NaN   |
| 5962 | RDX     | -0.09 | 0.00  | 0.00  | 0.17  |
| 5965 | RECQL   | 0.00  | 0.00  | 0.00  | NaN   |
| 5966 | REL     | 0.00  | 0.00  | 0.00  | NaN   |
| 5967 | REG1A   | 0.00  | 0.00  | 0.00  | NaN   |
| 5968 | REG1B   | 0.00  | 0.00  | 0.00  | NaN   |
| 5969 | REGL    | 0.00  | 0.00  | 0.00  | NaN   |
| 5970 | RELA    | -0.09 | 0.00  | 0.05  | 0.34  |
| 5971 | RELB    | 0.09  | 0.00  | 0.00  | -0.15 |
| 5972 | REN     | 0.00  | 0.13  | 0.00  | -0.17 |
| 5976 | RENT1   | 0.00  | 0.00  | 0.00  | NaN   |
| 5977 | REQ     | -0.09 | 0.00  | 0.00  | 0.43  |
| 5978 | REST    | 0.00  | 0.00  | 0.00  | NaN   |
| 5979 | RET     | 0.00  | 0.00  | 0.00  | NaN   |
| 5980 | REV3L   | 0.00  | 0.00  | 0.05  | 0.45  |
| 5981 | RFC1    | 0.00  | 0.00  | 0.05  | 0.43  |
| 5982 | RFC2    | -0.09 | 0.00  | 0.00  | 0.41  |
| 5983 | RFC3    | 0.00  | 0.00  | 0.05  | -0.07 |
| 5984 | RFC4    | 0.09  | 0.00  | 0.05  | 0.40  |
| 5985 | RFC5    | 0.00  | -0.13 | 0.00  | 0.38  |
| 5986 | RFNG    | 0.00  | 0.00  | 0.00  | NaN   |
| 5987 | RFP     | 0.00  | 0.00  | 0.00  | NaN   |
| 5988 | RFPL1   | 0.00  | 0.00  | 0.00  | NaN   |
| 5989 | RFX1    | 0.00  | 0.00  | 0.00  | NaN   |

|      |        |       |       |       |       |
|------|--------|-------|-------|-------|-------|
| 5990 | RFX2   | 0.00  | 0.00  | 0.00  | NaN   |
| 5991 | RFX3   | 0.00  | -0.13 | -0.10 | 0.28  |
| 5992 | RFX4   | 0.00  | 0.00  | 0.00  | NaN   |
| 5993 | RFX5   | 0.00  | 0.00  | 0.05  | 0.34  |
| 5994 | RFXAP  | 0.00  | 0.00  | 0.00  | NaN   |
| 5995 | RGR    | 0.09  | 0.00  | -0.05 | -0.05 |
| 5996 | RGS1   | 0.00  | 0.00  | 0.00  | NaN   |
| 5997 | RGS2   | 0.00  | 0.00  | 0.00  | NaN   |
| 5998 | RGS3   | 0.00  | 0.00  | 0.00  | NaN   |
| 5999 | RGS4   | 0.00  | 0.00  | 0.00  | NaN   |
| 6000 | RGS7   | 0.09  | 0.00  | 0.00  | 0.01  |
| 6001 | RGS10  | 0.00  | 0.00  | -0.05 | 0.23  |
| 6002 | RGS12  | 0.00  | -0.13 | -0.15 | 0.19  |
| 6003 | RGS13  | 0.00  | 0.00  | 0.00  | NaN   |
| 6004 | RGS16  | 0.00  | 0.00  | 0.00  | NaN   |
| 6005 | RHAG   | 0.00  | 0.00  | 0.00  | NaN   |
| 6006 | RHCE   | -0.09 | 0.00  | 0.00  | 0.17  |
| 6007 | RHD    | -0.36 | -0.25 | -0.30 | 0.23  |
| 6010 | RHO    | 0.00  | 0.00  | 0.00  | NaN   |
| 6011 | RHOK   | -0.09 | -0.13 | -0.05 | -0.02 |
| 6013 | RLN1   | -0.09 | -0.13 | -0.05 | 0.28  |
| 6014 | RIN    | 0.00  | -0.25 | 0.00  | 0.05  |
| 6015 | RING1  | 0.09  | 0.00  | 0.00  | 0.12  |
| 6016 | RIT    | 0.09  | 0.13  | 0.00  | 0.25  |
| 6017 | RLBP1  | 0.00  | 0.00  | -0.05 | 0.09  |
| 6019 | RLN2   | -0.09 | -0.13 | -0.05 | 0.21  |
| 6036 | RNASE2 | 0.00  | 0.00  | 0.00  | NaN   |
| 6037 | RNASE3 | 0.00  | 0.00  | 0.00  | NaN   |
| 6039 | RNASE6 | 0.00  | 0.00  | 0.00  | NaN   |
| 6041 | RNASEL | 0.00  | 0.00  | 0.00  | NaN   |
| 6045 | RNF2   | 0.00  | 0.00  | 0.50  | 0.44  |
| 6046 | BRD2   | 0.09  | 0.00  | 0.00  | 0.06  |
| 6047 | RNF4   | 0.00  | 0.00  | 0.00  | 0.54  |
| 6048 | RNF5   | 0.00  | 0.00  | 0.00  | NaN   |
| 6049 | RNF6   | 0.00  | -0.13 | -0.05 | 0.39  |
| 6050 | RNH    | -0.27 | -0.13 | -0.10 | 0.60  |
| 6051 | RNPEP  | 0.00  | 0.00  | 0.00  | NaN   |
| 6059 | ABCE1  | 0.00  | 0.00  | 0.00  | NaN   |
| 6091 | ROBO1  | -0.09 | 0.00  | -0.05 | 0.26  |
| 6093 | ROCK1  | 0.00  | 0.00  | 0.00  | NaN   |
| 6094 | ROM1   | 0.00  | 0.00  | 0.00  | NaN   |
| 6095 | RORA   | 0.00  | 0.00  | 0.00  | 0.42  |
| 6096 | RORB   | 0.00  | 0.00  | -0.05 | 0.09  |
| 6097 | RORC   | 0.00  | 0.13  | 0.05  | 0.03  |
| 6098 | ROS1   | -0.09 | 0.00  | 0.10  | -0.28 |
| 6117 | RPA1   | 0.00  | -0.13 | 0.00  | 0.03  |
| 6118 | RPA2   | 0.00  | 0.00  | 0.00  | NaN   |

|      |         |       |       |       |       |
|------|---------|-------|-------|-------|-------|
| 6119 | RPA3    | 0.00  | 0.00  | 0.05  | 0.24  |
| 6120 | RPE     | 0.00  | 0.00  | 0.00  | NaN   |
| 6121 | RPE65   | 0.00  | 0.00  | 0.00  | NaN   |
| 6122 | RPL3    | -0.09 | 0.00  | 0.05  | 0.16  |
| 6123 | RPL3L   | 0.00  | 0.00  | 0.00  | NaN   |
| 6124 | RPL4    | 0.00  | 0.00  | 0.00  | NaN   |
| 6125 | RPL5    | 0.00  | 0.00  | 0.05  | 0.40  |
| 6128 | RPL6    | 0.00  | 0.00  | 0.00  | NaN   |
| 6129 | RPL7    | 0.00  | 0.25  | 0.00  | 0.46  |
| 6130 | RPL7A   | 0.00  | 0.00  | 0.00  | NaN   |
| 6132 | RPL8    | 0.18  | 0.00  | 0.10  | 0.37  |
| 6133 | RPL9    | 0.00  | 0.00  | 0.00  | NaN   |
| 6135 | RPL11   | -0.09 | 0.00  | 0.00  | 0.11  |
| 6136 | RPL12   | -0.09 | 0.00  | -0.05 | 0.31  |
| 6137 | RPL13   | -0.09 | -0.13 | -0.05 | 0.40  |
| 6138 | RPL15   | 0.00  | 0.00  | 0.00  | NaN   |
| 6141 | RPL18   | 0.09  | 0.00  | 0.00  | 0.42  |
| 6142 | RPL18A  | 0.00  | 0.00  | 0.00  | NaN   |
| 6143 | RPL19   | 0.00  | 0.75  | 0.00  | 0.80  |
| 6144 | RPL21   | 0.00  | 0.00  | -0.05 | 0.21  |
| 6146 | RPL22   | 0.00  | 0.00  | 0.00  | NaN   |
| 6147 | RPL23A  | 0.00  | 0.25  | 0.00  | 0.26  |
| 6150 | MRPL23  | 0.00  | 0.50  | 0.00  | 0.31  |
| 6152 | RPL24   | 0.09  | 0.00  | 0.00  | 0.11  |
| 6155 | RPL27   | 0.00  | -0.13 | 0.00  | -0.01 |
| 6156 | RPL30   | 0.00  | 0.00  | 0.00  | NaN   |
| 6157 | RPL27A  | 0.00  | 0.00  | -0.05 | 0.17  |
| 6158 | RPL28   | 0.09  | 0.00  | 0.00  | 0.34  |
| 6159 | RPL29   | -0.09 | 0.00  | -0.10 | 0.52  |
| 6160 | RPL31   | 0.00  | 0.00  | 0.00  | NaN   |
| 6161 | RPL32   | 0.00  | 0.00  | 0.00  | NaN   |
| 6164 | RPL34   | 0.00  | 0.00  | 0.00  | NaN   |
| 6165 | RPL35A  | 0.18  | 0.00  | 0.00  | 0.64  |
| 6166 | RPL36AL | 0.00  | 0.00  | 0.00  | NaN   |
| 6167 | RPL37   | 0.00  | 0.00  | 0.10  | 0.17  |
| 6168 | RPL37A  | 0.00  | 0.00  | 0.00  | NaN   |
| 6169 | RPL38   | 0.00  | 0.13  | 0.00  | 0.26  |
| 6171 | RPL41   | 0.00  | 0.00  | 0.00  | NaN   |
| 6175 | RPLP0   | 0.00  | -0.13 | 0.00  | 0.12  |
| 6176 | RPLP1   | 0.00  | 0.00  | 0.00  | NaN   |
| 6181 | RPLP2   | -0.18 | -0.13 | -0.05 | 0.48  |
| 6182 | MRPL12  | 0.00  | 0.00  | 0.00  | NaN   |
| 6183 | MRPS12  | 0.00  | 0.00  | 0.00  | NaN   |
| 6184 | RPN1    | 0.00  | 0.00  | 0.00  | NaN   |
| 6185 | RPN2    | 0.00  | -0.13 | 0.00  | 0.26  |
| 6187 | RPS2    | 0.00  | 0.00  | 0.00  | NaN   |
| 6188 | RPS3    | 0.18  | 0.00  | 0.00  | 0.49  |

|      |         |       |       |       |       |
|------|---------|-------|-------|-------|-------|
| 6189 | RPS3A   | 0.00  | 0.00  | 0.00  | 0.49  |
| 6193 | RPS5    | 0.00  | 0.13  | 0.05  | 0.56  |
| 6194 | RPS6    | 0.00  | -0.25 | -0.10 | 0.68  |
| 6195 | RPS6KA1 | -0.09 | 0.00  | 0.00  | -0.03 |
| 6196 | RPS6KA2 | 0.00  | 0.00  | 0.00  | NaN   |
| 6198 | RPS6KB1 | 0.18  | 0.13  | 0.00  | 0.80  |
| 6199 | RPS6KB2 | 0.36  | 0.00  | 0.05  | 0.58  |
| 6201 | RPS7    | 0.00  | 0.00  | 0.00  | NaN   |
| 6202 | RPS8    | 0.09  | 0.00  | 0.00  | 0.32  |
| 6203 | RPS9    | 0.09  | 0.00  | 0.00  | 0.16  |
| 6204 | RPS10   | 0.00  | 0.00  | 0.00  | NaN   |
| 6205 | RPS11   | 0.00  | 0.00  | 0.00  | NaN   |
| 6207 | RPS13   | 0.00  | 0.00  | 0.00  | NaN   |
| 6208 | RPS14   | 0.00  | 0.00  | 0.00  | NaN   |
| 6209 | RPS15   | 0.00  | 0.00  | 0.00  | NaN   |
| 6210 | RPS15A  | 0.00  | 0.00  | 0.00  | NaN   |
| 6217 | RPS16   | 0.00  | 0.00  | 0.00  | NaN   |
| 6218 | RPS17   | 0.00  | 0.00  | 0.00  | NaN   |
| 6222 | RPS18   | 0.09  | 0.00  | 0.00  | 0.19  |
| 6223 | RPS19   | 0.00  | 0.00  | -0.05 | 0.32  |
| 6224 | RPS20   | 0.00  | 0.00  | 0.00  | NaN   |
| 6227 | RPS21   | 0.09  | 0.13  | 0.00  | 0.23  |
| 6228 | RPS23   | 0.00  | -0.13 | 0.00  | 0.35  |
| 6229 | RPS24   | 0.09  | 0.00  | 0.05  | 0.18  |
| 6230 | RPS25   | 0.00  | 0.00  | 0.00  | NaN   |
| 6231 | RPS26   | 0.00  | 0.00  | 0.00  | NaN   |
| 6232 | RPS27   | 0.09  | 0.13  | 0.00  | 0.19  |
| 6233 | RPS27A  | 0.09  | 0.00  | 0.00  | -0.13 |
| 6234 | RPS28   | 0.00  | 0.00  | 0.00  | NaN   |
| 6235 | RPS29   | 0.00  | 0.00  | 0.00  | NaN   |
| 6236 | RRAD    | -0.09 | -0.13 | 0.00  | -0.05 |
| 6237 | RRAS    | 0.00  | 0.00  | 0.00  | NaN   |
| 6238 | RRBP1   | 0.00  | 0.00  | 0.00  | NaN   |
| 6239 | RREB1   | 0.00  | -0.13 | 0.00  | 0.00  |
| 6240 | RRM1    | 0.00  | -0.13 | 0.00  | 0.56  |
| 6241 | RRM2    | 0.00  | 0.00  | -0.05 | 0.41  |
| 6248 | RSC1A1  | 0.00  | 0.00  | 0.00  | NaN   |
| 6249 | RSN     | 0.00  | -0.13 | 0.00  | 0.24  |
| 6251 | RSU1    | 0.00  | 0.00  | 0.05  | 0.27  |
| 6252 | RTN1    | 0.00  | 0.00  | 0.00  | NaN   |
| 6253 | RTN2    | 0.09  | 0.00  | 0.00  | 0.08  |
| 6256 | RXRA    | 0.00  | 0.00  | 0.00  | NaN   |
| 6257 | RXRB    | 0.09  | 0.00  | 0.00  | 0.18  |
| 6258 | RXRG    | 0.00  | 0.00  | 0.00  | NaN   |
| 6259 | RYK     | 0.00  | 0.00  | 0.00  | NaN   |
| 6261 | RYR1    | 0.00  | 0.00  | 0.00  | NaN   |
| 6262 | RYR2    | 0.00  | 0.00  | 0.00  | NaN   |

|      |          |       |       |       |       |
|------|----------|-------|-------|-------|-------|
| 6263 | RYR3     | 0.00  | 0.00  | 0.00  | NaN   |
| 6271 | S100A1   | 0.09  | 0.13  | 0.00  | 0.18  |
| 6272 | SORT1    | 0.09  | 0.00  | 0.05  | 0.40  |
| 6273 | S100A2   | 0.09  | 0.00  | 0.00  | -0.15 |
| 6274 | S100A3   | 0.09  | 0.13  | 0.00  | -0.18 |
| 6275 | S100A4   | 0.00  | 0.00  | 0.00  | NaN   |
| 6276 | S100A5   | 0.00  | 0.00  | 0.00  | NaN   |
| 6277 | S100A6   | 0.00  | 0.00  | 0.00  | NaN   |
| 6278 | S100A7   | 0.00  | 0.00  | 0.00  | NaN   |
| 6279 | S100A8   | 0.00  | 0.00  | 0.00  | NaN   |
| 6280 | S100A9   | 0.00  | 0.00  | 0.00  | NaN   |
| 6281 | S100A10  | 0.00  | 0.00  | 0.50  | 0.10  |
| 6282 | S100A11  | 0.00  | 0.00  | 0.05  | -0.03 |
| 6283 | S100A12  | 0.00  | 0.00  | 0.00  | NaN   |
| 6284 | S100A13  | 0.09  | 0.13  | 0.00  | 0.34  |
| 6285 | S100B    | 0.00  | 0.00  | 0.00  | NaN   |
| 6286 | S100P    | 0.00  | -0.13 | -0.10 | 0.08  |
| 6293 | SACM2L   | 0.09  | 0.00  | 0.00  | 0.12  |
| 6294 | SAFB     | 0.00  | 0.00  | 0.00  | NaN   |
| 6295 | SAG      | 0.00  | 0.00  | 0.00  | NaN   |
| 6296 | SAH      | 0.00  | 0.00  | 0.00  | NaN   |
| 6297 | SALL2    | 0.00  | 0.00  | 0.00  | NaN   |
| 6299 | SALL1    | 0.00  | 0.00  | -0.05 | 0.15  |
| 6301 | SARS     | 0.09  | 0.00  | 0.05  | 0.58  |
| 6302 | SAS      | 0.00  | 0.00  | 0.00  | NaN   |
| 6304 | SATB1    | 0.00  | 0.00  | 0.00  | NaN   |
| 6305 | SBF1     | 0.00  | -0.25 | 0.00  | 0.13  |
| 6307 | SC4MOL   | 0.00  | 0.00  | 0.00  | NaN   |
| 6309 | SC5DL    | -0.09 | 0.00  | -0.10 | 0.44  |
| 6310 | SCA1     | 0.00  | 0.00  | 0.00  | NaN   |
| 6311 | SCA2     | 0.00  | 0.00  | 0.00  | NaN   |
| 6314 | SCA7     | 0.09  | 0.00  | -0.05 | 0.45  |
| 6317 | SERPINB3 | -0.09 | 0.00  | -0.10 | 0.11  |
| 6318 | SERPINB4 | -0.09 | 0.00  | -0.15 | 0.08  |
| 6319 | SCD      | 0.00  | -0.13 | -0.05 | 0.36  |
| 6320 | SCGF     | 0.00  | 0.00  | 0.00  | NaN   |
| 6323 | SCN1A    | 0.00  | 0.00  | 0.00  | NaN   |
| 6324 | SCN1B    | 0.00  | 0.00  | 0.00  | NaN   |
| 6326 | SCN2A2   | 0.00  | 0.00  | 0.00  | NaN   |
| 6327 | SCN2B    | -0.09 | 0.00  | 0.00  | -0.01 |
| 6328 | SCN3A    | 0.00  | 0.00  | 0.00  | NaN   |
| 6329 | SCN4A    | 0.27  | 0.13  | 0.00  | 0.09  |
| 6331 | SCN5A    | 0.00  | 0.00  | 0.00  | NaN   |
| 6332 | SCN6A    | 0.00  | 0.00  | 0.00  | NaN   |
| 6334 | SCN8A    | 0.00  | 0.00  | 0.00  | NaN   |
| 6335 | SCN9A    | 0.00  | 0.00  | 0.00  | NaN   |
| 6336 | SCN10A   | 0.00  | 0.00  | 0.00  | NaN   |

|      |         |       |       |       |       |
|------|---------|-------|-------|-------|-------|
| 6337 | SCNN1A  | -0.09 | 0.00  | 0.00  | 0.01  |
| 6338 | SCNN1B  | 0.00  | 0.00  | -0.05 | 0.16  |
| 6339 | SCNN1D  | 0.00  | 0.00  | 0.00  | NaN   |
| 6340 | SCNN1G  | 0.00  | 0.00  | -0.05 | 0.12  |
| 6342 | SCP2    | 0.00  | 0.00  | 0.00  | NaN   |
| 6344 | SCTR    | 0.00  | 0.00  | 0.00  | NaN   |
| 6346 | SCYA1   | 0.00  | -0.13 | 0.00  | -0.07 |
| 6347 | SCYA2   | 0.00  | -0.13 | 0.00  | -0.07 |
| 6348 | SCYA3   | 0.00  | 0.13  | 0.00  | -0.04 |
| 6351 | SCYA4   | 0.00  | 0.13  | 0.00  | -0.10 |
| 6352 | SCYA5   | 0.00  | 0.00  | 0.00  | 0.08  |
| 6355 | SCYA8   | 0.00  | -0.13 | 0.00  | -0.28 |
| 6356 | SCYA11  | 0.00  | -0.13 | 0.00  | -0.26 |
| 6357 | SCYA13  | 0.00  | 0.00  | 0.50  | 0.07  |
| 6358 | SCYA14  | 0.00  | 0.50  | 0.00  | -0.16 |
| 6359 | SCYA15  | 0.00  | 0.50  | 0.00  | -0.03 |
| 6360 | SCYA16  | 0.00  | 0.00  | 0.00  | -0.28 |
| 6361 | SCYA17  | -0.09 | 0.00  | 0.00  | 0.28  |
| 6362 | SCYA18  | 0.00  | 1.00  | 0.00  | -0.07 |
| 6363 | SCYA19  | -0.09 | 0.13  | 0.10  | -0.07 |
| 6364 | SCYA20  | 0.00  | 0.00  | 0.00  | NaN   |
| 6366 | SCYA21  | -0.09 | 0.13  | 0.10  | -0.16 |
| 6367 | SCYA22  | -0.09 | 0.00  | 0.00  | -0.46 |
| 6368 | SCYA23  | 0.00  | 0.00  | 0.00  | -0.01 |
| 6369 | SCYA24  | -0.09 | 0.00  | 0.00  | -0.12 |
| 6370 | SCYA25  | 0.00  | 0.00  | 0.00  | NaN   |
| 6372 | SCYB6   | 0.00  | 0.00  | 0.00  | NaN   |
| 6373 | SCYB11  | 0.00  | 0.00  | 0.00  | NaN   |
| 6374 | SCYB5   | 0.00  | 0.00  | 0.00  | NaN   |
| 6375 | SCYC1   | 0.00  | 0.00  | 0.00  | NaN   |
| 6376 | SCYD1   | -0.09 | 0.00  | 0.00  | 0.05  |
| 6382 | SDC1    | 0.09  | 0.00  | -0.05 | 0.20  |
| 6383 | SDC2    | 0.00  | -0.25 | 0.00  | 0.22  |
| 6385 | SDC4    | 0.00  | 0.00  | 0.00  | NaN   |
| 6386 | SDCBP   | 0.00  | 0.00  | 0.00  | NaN   |
| 6387 | SDF1    | 0.00  | 0.00  | 0.00  | NaN   |
| 6388 | SDF2    | 0.00  | 0.38  | 0.00  | 0.39  |
| 6389 | SDHA    | 0.00  | 0.00  | 0.00  | 0.03  |
| 6390 | SDHB    | -0.09 | 0.00  | 0.00  | 0.44  |
| 6391 | SDHC    | 0.00  | 0.00  | 0.05  | 0.36  |
| 6392 | SDHD    | 0.00  | 0.00  | 0.00  | NaN   |
| 6396 | SEC13L1 | 0.00  | 0.00  | 0.00  | NaN   |
| 6397 | SEC14L1 | 0.00  | 0.13  | 0.00  | 0.39  |
| 6398 | SECTM1  | 0.00  | 0.00  | 0.00  | NaN   |
| 6400 | SEL1L   | 0.00  | 0.00  | 0.00  | NaN   |
| 6401 | SELE    | 0.00  | 0.00  | 0.00  | NaN   |
| 6402 | SELL    | 0.00  | 0.00  | 0.00  | NaN   |

|      |        |       |       |       |       |
|------|--------|-------|-------|-------|-------|
| 6403 | SELP   | 0.00  | 0.00  | 0.00  | NaN   |
| 6404 | SELPLG | 0.00  | -0.13 | 0.00  | -0.01 |
| 6405 | SEMA3F | -0.09 | 0.00  | -0.05 | 0.19  |
| 6406 | SEMG1  | 0.00  | 0.13  | 0.00  | 0.43  |
| 6414 | SEPP1  | 0.00  | 0.00  | 0.05  | -0.19 |
| 6415 | SEPW1  | 0.09  | 0.00  | 0.00  | 0.25  |
| 6416 | MAP2K4 | 0.00  | 0.00  | 0.00  | NaN   |
| 6418 | SET    | 0.00  | 0.00  | 0.00  | NaN   |
| 6419 | SETMAR | 0.00  | 0.00  | -0.05 | 0.18  |
| 6421 | SFPQ   | 0.00  | 0.00  | 0.00  | NaN   |
| 6422 | SFRP1  | 0.45  | -0.25 | -0.05 | -0.07 |
| 6424 | SFRP4  | 0.00  | 0.00  | 0.00  | NaN   |
| 6425 | SFRP5  | 0.00  | 0.00  | -0.05 | 0.14  |
| 6426 | SFRS1  | 0.09  | -0.13 | 0.00  | 0.34  |
| 6427 | SFRS2  | 0.00  | 0.13  | 0.00  | 0.18  |
| 6428 | SFRS3  | 0.00  | 0.00  | 0.05  | -0.07 |
| 6429 | SFRS4  | 0.00  | 0.00  | 0.00  | NaN   |
| 6430 | SFRS5  | 0.00  | 0.00  | 0.00  | NaN   |
| 6431 | SFRS6  | 0.00  | -0.13 | 0.00  | 0.00  |
| 6432 | SFRS7  | 0.00  | 0.13  | 0.00  | 0.09  |
| 6433 | SFRS8  | 0.00  | 0.00  | 0.00  | NaN   |
| 6434 | SFRS10 | 0.09  | 0.00  | 0.05  | 0.39  |
| 6439 | SFTPBB | 0.00  | 0.00  | -0.05 | 0.24  |
| 6440 | SFTPC  | -0.09 | 0.00  | 0.00  | 0.28  |
| 6441 | SFTPD  | 0.09  | 0.00  | 0.05  | 0.10  |
| 6442 | SGCA   | 0.00  | 0.25  | 0.00  | 0.18  |
| 6443 | SGCB   | 0.00  | 0.00  | 0.00  | NaN   |
| 6444 | SGCD   | 0.00  | 0.00  | -0.05 | 0.15  |
| 6445 | SGCG   | 0.50  | 0.00  | 0.00  | 0.76  |
| 6446 | SGK    | 0.00  | 0.00  | -0.05 | 0.19  |
| 6447 | SGNE1  | 0.00  | 0.00  | 0.00  | NaN   |
| 6448 | SGSH   | 0.00  | 0.00  | 0.00  | NaN   |
| 6449 | SGT    | 0.00  | 0.00  | 0.00  | NaN   |
| 6450 | SH3BGR | 0.00  | 0.00  | 0.00  | NaN   |
| 6452 | SH3BP2 | 0.00  | -0.13 | -0.15 | 0.36  |
| 6453 | ITSN1  | 0.00  | 0.00  | 0.00  | NaN   |
| 6455 | SH3GL1 | 0.00  | 0.00  | 0.00  | NaN   |
| 6456 | SH3GL2 | 0.00  | -0.13 | -0.20 | -0.04 |
| 6457 | SH3GL3 | 0.00  | 0.00  | -0.05 | 0.11  |
| 6461 | SHB    | -0.09 | 0.00  | 0.10  | 0.58  |
| 6462 | SHBG   | 0.00  | 0.00  | 0.05  | -0.01 |
| 6464 | SHC1   | 0.09  | 0.13  | 0.00  | 0.08  |
| 6468 | SHFM3  | 0.00  | -0.13 | -0.05 | 0.18  |
| 6469 | SHH    | 0.00  | 0.00  | 0.00  | NaN   |
| 6470 | SHMT1  | 0.00  | 0.00  | 0.00  | NaN   |
| 6472 | SHMT2  | 0.00  | 0.00  | 0.00  | NaN   |
| 6474 | SHOX2  | 0.00  | 0.00  | 0.00  | NaN   |

|      |        |       |       |       |       |
|------|--------|-------|-------|-------|-------|
| 6476 | SI     | 0.00  | 0.00  | 0.00  | NaN   |
| 6477 | SIAH1  | -0.09 | 0.00  | 0.00  | 0.55  |
| 6478 | SIAH2  | 0.09  | 0.00  | 0.00  | -0.01 |
| 6480 | SIAT1  | 0.09  | 0.00  | 0.05  | 0.10  |
| 6482 | SIAT4A | 0.00  | 0.00  | 0.05  | 0.37  |
| 6483 | SIAT4B | -0.09 | -0.13 | 0.05  | 0.02  |
| 6484 | SIAT4C | -0.09 | 0.00  | -0.15 | 0.34  |
| 6489 | SIAT8A | 0.00  | 0.00  | 0.00  | NaN   |
| 6490 | SILV   | 0.00  | 0.00  | 0.00  | NaN   |
| 6491 | SIL    | 0.00  | 0.00  | 0.00  | NaN   |
| 6493 | SIM2   | 0.00  | 0.00  | 0.00  | NaN   |
| 6494 | SIPA1  | -0.09 | 0.00  | 0.05  | 0.13  |
| 6495 | SIX1   | 0.00  | 0.00  | 0.00  | NaN   |
| 6496 | SIX3   | 0.00  | 0.00  | 0.00  | NaN   |
| 6497 | SKI    | 0.00  | 0.00  | 0.00  | NaN   |
| 6498 | SKIL   | 0.09  | 0.00  | 0.00  | 0.23  |
| 6499 | SKIV2L | 0.00  | 0.00  | 0.00  | NaN   |
| 6500 | SKP1A  | 0.00  | -0.13 | 0.00  | 0.40  |
| 6502 | SKP2   | 0.00  | 0.00  | 0.10  | 0.36  |
| 6503 | SLA    | 0.00  | 0.00  | 0.05  | -0.14 |
| 6504 | SLAM   | 0.00  | 0.00  | 0.00  | NaN   |
| 6505 | SLC1A1 | -0.09 | -0.13 | -0.15 | 0.34  |
| 6506 | SLC1A2 | 0.00  | 0.13  | 0.05  | -0.15 |
| 6507 | SLC1A3 | 0.00  | 0.00  | 0.10  | -0.11 |
| 6508 | SLC4A3 | 0.00  | 0.00  | 0.00  | NaN   |
| 6509 | SLC1A4 | 0.00  | 0.00  | 0.00  | NaN   |
| 6510 | SLC1A5 | 0.09  | 0.00  | 0.00  | 0.47  |
| 6511 | SLC1A6 | 0.00  | 0.00  | 0.00  | NaN   |
| 6512 | SLC1A7 | 0.00  | 0.00  | 0.00  | NaN   |
| 6513 | SLC2A1 | 0.00  | 0.00  | 0.00  | NaN   |
| 6514 | SLC2A2 | 0.09  | 0.00  | 0.00  | 0.21  |
| 6515 | SLC2A3 | -0.09 | 0.00  | 0.00  | 0.11  |
| 6517 | SLC2A4 | 0.00  | 0.00  | 0.00  | NaN   |
| 6518 | SLC2A5 | 0.00  | 0.00  | 0.00  | NaN   |
| 6519 | SLC3A1 | 0.00  | 0.00  | 0.00  | NaN   |
| 6520 | SLC3A2 | 0.00  | 0.00  | 0.00  | NaN   |
| 6521 | SLC4A1 | 0.00  | -0.13 | 0.00  | 0.14  |
| 6522 | SLC4A2 | 0.00  | 0.00  | -0.05 | 0.32  |
| 6523 | SLC5A1 | 0.00  | 0.00  | 0.00  | NaN   |
| 6524 | SLC5A2 | 0.00  | 0.00  | 0.00  | NaN   |
| 6525 | SMTN   | 0.00  | 0.00  | 0.00  | NaN   |
| 6527 | SLC5A4 | 0.00  | 0.00  | 0.00  | NaN   |
| 6528 | SLC5A5 | 0.00  | 0.00  | 0.00  | NaN   |
| 6529 | SLC6A1 | 0.00  | 0.00  | 0.00  | NaN   |
| 6530 | SLC6A2 | 0.33  | 0.00  | 0.33  | 0.82  |
| 6531 | SLC6A3 | 0.00  | 0.13  | 0.10  | -0.12 |
| 6532 | SLC6A4 | 0.00  | 0.38  | 0.00  | 0.25  |



|      |         |       |       |       |       |
|------|---------|-------|-------|-------|-------|
| 6533 | SLC6A6  | 0.00  | 0.00  | 0.00  | NaN   |
| 6534 | SLC6A7  | 0.00  | 0.00  | 0.00  | NaN   |
| 6536 | SLC6A9  | 0.00  | 0.00  | 0.00  | NaN   |
| 6538 | SLC6A11 | 0.00  | 0.00  | 0.00  | NaN   |
| 6539 | SLC6A12 | 0.00  | 0.00  | 0.00  | 0.10  |
| 6540 | SLC6A13 | 0.00  | 0.00  | 0.05  | 0.22  |
| 6541 | SLC7A1  | 0.00  | 0.00  | -0.05 | 0.01  |
| 6542 | SLC7A2  | 0.00  | -0.13 | -0.05 | 0.01  |
| 6543 | SLC8A2  | 0.09  | 0.00  | 0.00  | 0.06  |
| 6545 | SLC7A4  | 0.00  | 0.13  | 0.05  | 0.12  |
| 6546 | SLC8A1  | 0.00  | 0.00  | 0.00  | NaN   |
| 6548 | SLC9A1  | -0.09 | -0.13 | 0.00  | 0.12  |
| 6549 | SLC9A2  | 0.00  | 0.00  | 0.00  | NaN   |
| 6550 | SLC9A3  | 0.00  | 0.13  | 0.10  | -0.01 |
| 6553 | SLC9A5  | -0.09 | 0.00  | 0.00  | 0.22  |
| 6554 | SLC10A1 | 0.00  | 0.00  | 0.00  | NaN   |
| 6555 | SLC10A2 | -0.09 | -0.13 | 0.05  | -0.03 |
| 6556 | SLC11A1 | 0.00  | 0.00  | 0.00  | NaN   |
| 6557 | SLC12A1 | 0.00  | 0.00  | 0.00  | NaN   |
| 6558 | SLC12A2 | 0.00  | 0.00  | 0.00  | NaN   |
| 6559 | SLC12A3 | -0.09 | 0.00  | 0.00  | -0.07 |
| 6560 | SLC12A4 | -0.09 | -0.13 | 0.00  | -0.01 |
| 6561 | SLC13A1 | 0.00  | 0.13  | 0.00  | 0.06  |
| 6563 | SLC14A1 | -0.09 | -0.13 | -0.20 | -0.01 |
| 6564 | SLC15A1 | -0.09 | -0.13 | -0.05 | 0.38  |
| 6565 | SLC15A2 | 0.00  | 0.00  | 0.05  | 0.43  |
| 6566 | SLC16A1 | 0.00  | 0.00  | 0.05  | 0.25  |
| 6568 | SLC17A1 | 0.00  | 0.00  | 0.05  | 0.19  |
| 6569 | SLC34A1 | 0.00  | 0.50  | 0.50  | 0.12  |
| 6570 | SLC18A1 | 0.00  | 0.00  | 0.00  | -0.03 |
| 6571 | SLC18A2 | 0.00  | 0.00  | -0.05 | 0.02  |
| 6572 | SLC18A3 | 0.00  | 0.00  | 0.00  | NaN   |
| 6573 | SLC19A1 | 0.00  | 0.00  | 0.00  | NaN   |
| 6574 | SLC20A1 | 0.00  | 0.00  | 0.00  | NaN   |
| 6575 | SLC20A2 | 0.36  | 0.00  | -0.05 | 0.29  |
| 6576 | SLC25A1 | -0.09 | 0.00  | 0.00  | 0.12  |
| 6578 | SLC21A2 | 0.00  | 0.00  | 0.00  | NaN   |
| 6579 | SLC21A3 | 0.00  | 0.00  | 0.00  | NaN   |
| 6580 | SLC22A1 | 0.00  | 0.00  | 0.00  | NaN   |
| 6581 | SLC22A3 | 0.00  | 0.00  | -0.05 | -0.06 |
| 6582 | SLC22A2 | 0.00  | 0.00  | 0.00  | NaN   |
| 6583 | SLC22A4 | 0.00  | -0.13 | 0.00  | 0.23  |
| 6584 | SLC22A5 | 0.00  | -0.13 | 0.00  | -0.12 |
| 6585 | SLIT1   | 0.00  | 0.00  | 0.00  | 0.03  |
| 6588 | SLN     | 0.00  | 0.00  | 0.00  | NaN   |
| 6590 | SLPI    | 0.00  | 0.00  | 0.00  | NaN   |
| 6591 | SNAI2   | 0.00  | 0.13  | 0.00  | -0.12 |

|      |         |       |       |       |       |
|------|---------|-------|-------|-------|-------|
| 6595 | SMARCA2 | -0.09 | -0.13 | -0.05 | 0.48  |
| 6596 | SMARCA3 | 0.00  | 0.00  | 0.05  | 0.46  |
| 6597 | SMARCA4 | 0.00  | 0.00  | 0.00  | NaN   |
| 6598 | SMARCB1 | 0.00  | 0.00  | 0.05  | 0.37  |
| 6599 | SMARCC1 | -0.09 | 0.00  | -0.05 | 0.52  |
| 6601 | SMARCC2 | 0.00  | 0.00  | 0.00  | NaN   |
| 6602 | SMARCD1 | 0.00  | 0.00  | 0.00  | NaN   |
| 6604 | SMARCD3 | 0.00  | 0.00  | -0.05 | 0.20  |
| 6605 | SMARCE1 | 0.00  | 0.38  | 0.00  | 0.46  |
| 6606 | SMN1    | 1.00  | 0.00  | 0.00  | 0.06  |
| 6608 | SMOH    | 0.00  | 0.00  | 0.00  | NaN   |
| 6609 | SMPD1   | 0.00  | -0.13 | 0.00  | 0.15  |
| 6610 | SMPD2   | 0.00  | 0.00  | 0.05  | 0.44  |
| 6612 | SMT3H1  | 0.00  | 0.00  | 0.00  | NaN   |
| 6613 | SMT3H2  | 0.00  | 0.13  | 0.00  | 0.45  |
| 6614 | SN      | 0.00  | 0.00  | 0.00  | NaN   |
| 6615 | SNAI1   | 0.27  | 0.38  | 0.05  | 0.07  |
| 6616 | SNAP25  | 0.00  | 0.00  | 0.05  | 0.00  |
| 6617 | SNAPC1  | 0.00  | 0.00  | 0.00  | NaN   |
| 6618 | SNAPC2  | 0.00  | 0.00  | 0.00  | NaN   |
| 6619 | SNAPC3  | 0.00  | -0.13 | 0.00  | 0.48  |
| 6620 | SNCB    | 0.00  | 0.00  | 0.00  | NaN   |
| 6621 | SNAPC4  | 0.00  | 0.00  | 0.00  | NaN   |
| 6622 | SNCA    | 0.00  | 0.00  | 0.00  | NaN   |
| 6623 | SNCG    | 0.09  | 0.00  | 0.00  | 0.13  |
| 6624 | SNL     | 0.00  | 0.00  | 0.10  | 0.48  |
| 6625 | SNRP70  | 0.09  | 0.00  | 0.00  | 0.25  |
| 6626 | SNRPA   | 0.00  | 0.00  | 0.00  | NaN   |
| 6627 | SNRPA1  | 0.00  | 0.00  | 0.00  | NaN   |
| 6628 | SNRPB   | 0.00  | 0.00  | 0.05  | 0.26  |
| 6629 | SNRPB2  | 0.00  | 0.00  | 0.00  | NaN   |
| 6632 | SNRPD1  | 0.00  | 0.00  | 0.00  | NaN   |
| 6633 | SNRPD2  | 0.09  | 0.00  | 0.00  | 0.32  |
| 6634 | SNRPD3  | 0.00  | 0.00  | 0.05  | -0.17 |
| 6635 | SNRPE   | 0.00  | 0.13  | 0.00  | 0.16  |
| 6636 | SNRPF   | 0.00  | 0.13  | 0.00  | 0.22  |
| 6637 | SNRPG   | 0.00  | 0.00  | 0.00  | NaN   |
| 6638 | SNRPN   | 0.00  | 0.00  | 0.00  | NaN   |
| 6640 | SNTA1   | 0.00  | 0.00  | 0.00  | NaN   |
| 6641 | SNTB1   | 0.00  | 0.38  | 0.15  | 0.36  |
| 6642 | SNX1    | 0.00  | 0.00  | 0.00  | NaN   |
| 6643 | SNX2    | 0.00  | 0.00  | 0.00  | NaN   |
| 6645 | SNTB2   | -0.09 | -0.13 | 0.05  | 0.41  |
| 6646 | SOAT1   | 0.00  | 0.00  | 0.00  | NaN   |
| 6647 | SOD1    | 0.00  | 0.00  | 0.00  | NaN   |
| 6648 | SOD2    | 0.00  | 0.00  | 0.00  | NaN   |
| 6649 | SOD3    | 0.00  | 0.00  | -0.05 | -0.10 |

|      |        |       |       |       |       |
|------|--------|-------|-------|-------|-------|
| 6650 | SOLH   | 0.00  | 0.00  | -0.05 | 0.34  |
| 6651 | SON    | 0.00  | 0.00  | 0.00  | NaN   |
| 6652 | SORD   | 0.00  | 0.00  | 0.00  | NaN   |
| 6653 | SORL1  | -0.09 | 0.00  | -0.10 | 0.26  |
| 6654 | SOS1   | 0.00  | 0.13  | 0.00  | -0.03 |
| 6655 | SOS2   | 0.00  | 0.00  | 0.00  | NaN   |
| 6656 | SOX1   | -0.09 | -0.13 | -0.05 | -0.09 |
| 6657 | SOX2   | 0.09  | 0.00  | 0.00  | 0.03  |
| 6659 | SOX4   | 0.00  | 0.00  | 0.00  | NaN   |
| 6660 | SOX5   | 0.00  | 0.00  | 0.00  | NaN   |
| 6662 | SOX9   | 0.00  | 0.00  | 0.50  | 0.18  |
| 6663 | SOX10  | 0.00  | 0.00  | 0.05  | 0.79  |
| 6664 | SOX11  | 0.00  | 0.00  | 0.00  | NaN   |
| 6665 | SOX20  | 0.00  | 0.00  | 0.00  | NaN   |
| 6666 | SOX22  | 0.00  | 0.00  | 0.05  | 0.27  |
| 6668 | SP2    | 0.00  | 0.00  | 0.00  | 0.38  |
| 6671 | SP4    | 0.00  | 0.13  | 0.00  | 0.32  |
| 6672 | SP100  | 0.00  | 0.00  | 0.00  | NaN   |
| 6674 | SPAG1  | 0.09  | 0.00  | 0.05  | 0.29  |
| 6675 | UAP1   | 0.00  | 0.00  | 0.00  | NaN   |
| 6676 | SPAG4  | 0.00  | 0.00  | 0.00  | NaN   |
| 6677 | SPAM1  | 0.00  | 0.50  | 0.00  | 0.26  |
| 6678 | SPARC  | 0.00  | 0.00  | 0.00  | NaN   |
| 6683 | SPG4   | 0.00  | 0.00  | 0.00  | NaN   |
| 6687 | SPG7   | -0.09 | -0.13 | -0.05 | 0.67  |
| 6688 | SPI1   | 0.00  | 0.00  | 0.00  | NaN   |
| 6689 | SPIB   | 0.00  | 0.00  | 0.00  | NaN   |
| 6690 | SPINK1 | 0.00  | 0.00  | 0.00  | NaN   |
| 6691 | SPINK2 | 0.00  | 0.00  | 0.00  | NaN   |
| 6692 | SPINT1 | 0.00  | 0.00  | 0.00  | NaN   |
| 6693 | SPN    | 0.00  | 0.00  | 0.00  | NaN   |
| 6694 | SPP2   | 0.00  | 0.00  | 0.00  | NaN   |
| 6695 | SPOCK  | 0.00  | -0.13 | 0.00  | 0.07  |
| 6696 | SPP1   | 0.00  | 0.00  | 0.00  | NaN   |
| 6697 | SPR    | 0.00  | 0.00  | 0.00  | NaN   |
| 6698 | SPRR1A | 0.00  | 0.00  | 0.00  | NaN   |
| 6699 | SPRR1B | 0.00  | 0.00  | 0.00  | NaN   |
| 6701 | SPRR2B | 0.00  | 0.00  | 0.00  | NaN   |
| 6702 | SPRR2C | 0.00  | 0.00  | 0.00  | NaN   |
| 6707 | SPRR3  | 0.00  | 0.00  | 0.00  | NaN   |
| 6708 | SPTA1  | 0.00  | 0.00  | 0.00  | NaN   |
| 6709 | SPTAN1 | 0.00  | 0.00  | 0.00  | NaN   |
| 6710 | SPTB   | 0.00  | 0.00  | 0.00  | NaN   |
| 6711 | SPTBN1 | 0.09  | 0.00  | -0.05 | 0.19  |
| 6712 | SPTBN2 | 0.00  | 0.00  | 0.05  | -0.01 |
| 6713 | SQLE   | 0.18  | 0.38  | 0.00  | 0.60  |
| 6714 | SRC    | 0.00  | -0.13 | 0.00  | 0.16  |

|      |        |       |       |       |       |
|------|--------|-------|-------|-------|-------|
| 6715 | SRD5A1 | 0.00  | 0.00  | 0.05  | 0.77  |
| 6716 | SRD5A2 | 0.00  | 0.00  | 0.00  | NaN   |
| 6717 | SRI    | 0.00  | 0.00  | 0.00  | NaN   |
| 6718 | AKR1D1 | 0.00  | 0.00  | 0.00  | NaN   |
| 6720 | SREBF1 | 0.00  | 0.00  | 0.00  | NaN   |
| 6721 | SREBF2 | 0.00  | 0.00  | 0.05  | 0.04  |
| 6722 | SRF    | 0.00  | 0.00  | 0.00  | NaN   |
| 6723 | SRM    | 0.00  | 0.00  | 0.05  | -0.03 |
| 6726 | SRP9   | 0.09  | 0.00  | 0.00  | 0.11  |
| 6727 | SRP14  | 0.00  | 0.00  | -0.05 | 0.49  |
| 6728 | SRP19  | 0.00  | 0.00  | 0.00  | NaN   |
| 6729 | SRP54  | 0.00  | 0.00  | 0.00  | NaN   |
| 6731 | SRP72  | 0.00  | 0.00  | 0.00  | NaN   |
| 6732 | SRPK1  | 0.00  | 0.00  | 0.00  | NaN   |
| 6733 | SRPK2  | 0.09  | 0.00  | 0.00  | 0.35  |
| 6734 | SRPR   | -0.09 | 0.00  | -0.15 | 0.51  |
| 6737 | SSA1   | 0.00  | -0.13 | 0.00  | 0.20  |
| 6738 | SSA2   | 0.09  | 0.00  | 0.00  | 0.36  |
| 6741 | SSB    | 0.00  | 0.00  | 0.00  | NaN   |
| 6742 | SSBP1  | 0.00  | 0.00  | 0.00  | NaN   |
| 6744 | SSFA2  | 0.00  | 0.00  | 0.00  | NaN   |
| 6745 | SSR1   | 0.00  | -0.13 | 0.00  | 0.40  |
| 6746 | SSR2   | 0.00  | 0.13  | 0.00  | 0.35  |
| 6747 | SSR3   | 0.00  | 0.00  | 0.00  | NaN   |
| 6749 | SSRP1  | 0.00  | 0.00  | 0.00  | NaN   |
| 6750 | SST    | 0.00  | 0.00  | 0.10  | -0.19 |
| 6751 | SSTR1  | 0.00  | 0.00  | 0.00  | NaN   |
| 6752 | SSTR2  | 0.00  | 0.00  | 0.00  | NaN   |
| 6753 | SSTR3  | 0.00  | 0.00  | 0.00  | NaN   |
| 6754 | SSTR4  | 0.00  | 0.00  | 0.00  | NaN   |
| 6755 | SSTR5  | 0.00  | 0.00  | -0.05 | -0.17 |
| 6760 | SS18   | 0.00  | 0.00  | -0.10 | 0.35  |
| 6764 | ST5    | 0.00  | 0.00  | -0.05 | 0.22  |
| 6767 | ST13   | 0.00  | 0.50  | 0.50  | 0.22  |
| 6768 | ST14   | -0.09 | 0.00  | -0.10 | 0.19  |
| 6769 | STAC   | 0.00  | 0.00  | 0.00  | NaN   |
| 6772 | STAT1  | 0.00  | 0.00  | 0.00  | NaN   |
| 6773 | STAT2  | 0.00  | 0.00  | 0.00  | NaN   |
| 6774 | STAT3  | 0.00  | 0.13  | 0.00  | 0.27  |
| 6775 | STAT4  | 0.00  | 0.00  | 0.00  | NaN   |
| 6776 | STAT5A | 0.00  | 0.13  | 0.00  | 0.05  |
| 6777 | STAT5B | 0.00  | 0.13  | 0.00  | 0.33  |
| 6778 | STAT6  | 0.00  | 0.00  | 0.00  | NaN   |
| 6779 | STATH  | 0.00  | 0.00  | 0.00  | NaN   |
| 6780 | STAU   | 0.09  | 0.00  | 0.00  | 0.45  |
| 6781 | STC1   | -0.09 | -0.25 | -0.15 | 0.14  |
| 6782 | STCH   | 0.00  | -0.25 | -0.05 | 0.44  |

|      |         |       |       |       |       |
|------|---------|-------|-------|-------|-------|
| 6783 | STE     | 0.00  | 0.00  | 0.00  | NaN   |
| 6785 | ELOVL4  | 0.00  | 0.00  | 0.00  | NaN   |
| 6786 | STIM1   | 0.00  | -0.13 | 0.00  | 0.08  |
| 6787 | NEK4    | -0.09 | 0.00  | -0.10 | 0.31  |
| 6788 | STK3    | 0.00  | 0.00  | 0.00  | NaN   |
| 6789 | STK4    | 0.09  | 0.13  | 0.00  | 0.02  |
| 6790 | STK6    | 0.09  | 0.50  | 0.00  | 0.38  |
| 6793 | STK10   | 0.00  | 0.00  | 0.00  | NaN   |
| 6794 | STK11   | 0.00  | 0.00  | 0.00  | NaN   |
| 6795 | STK13   | 0.09  | 0.13  | 0.00  | 0.27  |
| 6799 | SULT1A2 | 0.00  | 0.00  | 0.00  | NaN   |
| 6801 | STRN    | 0.00  | 0.00  | 0.00  | NaN   |
| 6804 | STX1A   | -0.09 | 0.00  | 0.00  | 0.12  |
| 6809 | STX3A   | 0.00  | 0.00  | 0.00  | NaN   |
| 6810 | STX4A   | 0.00  | 0.00  | 0.00  | NaN   |
| 6811 | STX5A   | 0.00  | 0.00  | 0.00  | NaN   |
| 6812 | STXBP1  | -0.09 | 0.00  | -0.05 | 0.19  |
| 6813 | STXBP2  | 0.00  | 0.00  | 0.00  | NaN   |
| 6814 | STXBP3  | 0.00  | 0.00  | 0.05  | 0.53  |
| 6817 | SULT1A1 | 0.00  | 0.00  | 0.00  | NaN   |
| 6818 | SULT1A3 | 0.00  | 0.00  | 0.00  | NaN   |
| 6819 | SULT1C1 | 0.00  | 0.00  | 0.00  | NaN   |
| 6820 | SULT2B1 | 0.09  | 0.00  | 0.00  | 0.22  |
| 6821 | SUOX    | 0.00  | 0.00  | 0.00  | NaN   |
| 6822 | SULT2A1 | 0.09  | 0.00  | 0.00  | 0.09  |
| 6827 | SUPT4H1 | 0.09  | 0.00  | 0.00  | 0.58  |
| 6829 | SUPT5H  | 0.00  | 0.00  | 0.00  | NaN   |
| 6830 | SUPT6H  | 0.00  | 0.25  | 0.00  | 0.65  |
| 6832 | SUPV3L1 | 0.00  | 0.00  | 0.00  | NaN   |
| 6833 | ABCC8   | 0.00  | 0.00  | 0.00  | NaN   |
| 6834 | SURF1   | 0.00  | 0.00  | 0.00  | NaN   |
| 6835 | SURF2   | 0.00  | 0.00  | 0.00  | NaN   |
| 6837 | SURF5   | 0.00  | 0.50  | 0.00  | 0.11  |
| 6840 | SVIL    | -0.09 | 0.00  | 0.05  | 0.49  |
| 6843 | VAMP1   | -0.09 | 0.00  | 0.00  | 0.13  |
| 6844 | VAMP2   | 0.00  | 0.00  | 0.00  | NaN   |
| 6846 | SCYC2   | 0.00  | 0.00  | 0.00  | NaN   |
| 6847 | SYCP1   | 0.18  | 0.00  | 0.10  | 0.23  |
| 6850 | SYK     | 0.00  | 0.00  | 0.00  | NaN   |
| 6854 | SYN2    | 0.09  | 0.00  | 0.00  | 0.16  |
| 6856 | SYPL    | 0.09  | 0.00  | 0.00  | 0.25  |
| 6857 | SYT1    | 0.00  | 0.00  | 0.00  | NaN   |
| 6861 | SYT5    | 0.09  | 0.00  | 0.00  | 0.70  |
| 6862 | T       | 0.00  | 0.00  | 0.00  | NaN   |
| 6863 | TAC1    | 0.18  | 0.00  | 0.00  | -0.03 |
| 6865 | TACR2   | 0.00  | 0.00  | 0.00  | NaN   |
| 6866 | TAC3    | 0.00  | 0.00  | 0.00  | NaN   |

|      |        |       |       |       |       |
|------|--------|-------|-------|-------|-------|
| 6867 | TACC1  | 0.27  | -0.13 | 0.00  | 0.41  |
| 6868 | ADAM17 | 0.50  | 0.00  | 0.00  | 0.31  |
| 6869 | TACR1  | 0.00  | 0.00  | 0.00  | NaN   |
| 6870 | TACR3  | 0.00  | 0.00  | 0.00  | NaN   |
| 6871 | TADA2L | 0.00  | 0.00  | 0.00  | 0.53  |
| 6874 | TAF4   | 0.18  | 0.25  | 0.10  | 0.13  |
| 6875 | TAF4B  | 0.00  | 0.00  | -0.15 | 0.28  |
| 6876 | TAGLN  | -0.09 | 0.00  | 0.00  | 0.12  |
| 6877 | TAF5   | 0.00  | -0.13 | -0.05 | 0.15  |
| 6878 | TAF6   | 0.18  | 0.00  | 0.00  | 0.23  |
| 6879 | TAF7   | 0.00  | 0.00  | 0.00  | NaN   |
| 6880 | TAF9   | 0.00  | 0.00  | 0.00  | NaN   |
| 6881 | TAF10  | 0.00  | -0.13 | 0.00  | 0.27  |
| 6883 | TAF12  | 0.00  | 0.00  | 0.00  | NaN   |
| 6884 | TAF13  | 0.09  | 0.00  | 0.05  | 0.41  |
| 6885 | MAP3K7 | 0.00  | 0.00  | 0.00  | NaN   |
| 6886 | TAL1   | 0.00  | 0.00  | 0.00  | NaN   |
| 6888 | TALDO1 | -0.18 | -0.13 | -0.05 | 0.39  |
| 6890 | TAP1   | 0.09  | 0.00  | 0.00  | 0.05  |
| 6891 | TAP2   | 0.09  | 0.00  | 0.00  | 0.05  |
| 6894 | TARBP1 | 0.09  | 0.00  | 0.00  | 0.03  |
| 6895 | TARBP2 | 0.00  | 0.00  | 0.00  | NaN   |
| 6897 | TARS   | 0.00  | 0.00  | 0.10  | 0.37  |
| 6898 | TAT    | 0.00  | 0.13  | 0.05  | 0.53  |
| 6899 | TBX1   | -0.09 | 0.00  | 0.00  | 0.15  |
| 6900 | CNTN2  | 0.00  | 0.13  | 0.00  | -0.18 |
| 6902 | TBCA   | 0.00  | 0.00  | 0.00  | NaN   |
| 6903 | TBCC   | 0.00  | 0.00  | 0.00  | NaN   |
| 6904 | TBCD   | 0.00  | 0.00  | 0.00  | NaN   |
| 6905 | TBCE   | 0.09  | 0.00  | 0.00  | 0.27  |
| 6908 | TBP    | 0.00  | 0.00  | 0.00  | NaN   |
| 6909 | TBX2   | 0.27  | 0.13  | 0.00  | 0.70  |
| 6910 | TBX5   | 0.00  | 0.00  | 0.00  | NaN   |
| 6911 | TBX6   | 0.00  | 0.00  | 0.00  | NaN   |
| 6915 | TBXA2R | 0.00  | 0.00  | 0.00  | NaN   |
| 6916 | TBXAS1 | 0.00  | 0.00  | 0.00  | NaN   |
| 6917 | TCEA1  | 0.00  | 0.00  | 0.00  | NaN   |
| 6919 | TCEA2  | 0.00  | 0.00  | 0.00  | NaN   |
| 6921 | TCEB1  | 0.00  | 0.25  | 0.00  | 0.48  |
| 6923 | TCEB2  | 0.00  | 0.13  | 0.00  | 0.32  |
| 6924 | TCEB3  | -0.09 | 0.00  | 0.00  | 0.31  |
| 6925 | TCF4   | -0.09 | 0.00  | -0.20 | 0.08  |
| 6926 | TBX3   | 0.00  | 0.00  | 0.00  | NaN   |
| 6927 | TCF1   | 0.00  | -0.13 | 0.00  | -0.21 |
| 6928 | TCF2   | 0.00  | 0.13  | 0.00  | 0.42  |
| 6929 | TCF3   | 0.00  | 0.00  | 0.00  | NaN   |
| 6932 | TCF7   | 0.00  | -0.13 | 0.00  | 0.08  |

|      |         |       |       |       |       |
|------|---------|-------|-------|-------|-------|
| 6934 | TCF7L2  | 0.00  | 0.00  | -0.05 | 0.21  |
| 6935 | TCF8    | -0.09 | -0.13 | 0.05  | 0.07  |
| 6936 | C2orf3  | 0.00  | 0.00  | 0.00  | NaN   |
| 6938 | TCF12   | 0.00  | 0.00  | 0.05  | 0.20  |
| 6939 | TCF15   | 0.00  | 0.00  | 0.00  | 0.25  |
| 6940 | ZNF354A | 0.00  | 0.00  | 0.00  | NaN   |
| 6942 | TCF20   | 0.00  | 0.00  | 0.00  | NaN   |
| 6943 | TCF21   | 0.00  | 0.00  | 0.00  | NaN   |
| 6944 | TCFL1   | 0.00  | 0.00  | 0.05  | 0.50  |
| 6945 | TCFL4   | 0.00  | -0.13 | 0.00  | 0.17  |
| 6947 | TCN1    | 0.00  | 0.00  | 0.00  | NaN   |
| 6948 | TCN2    | 0.00  | 0.00  | 0.00  | NaN   |
| 6949 | TCOF1   | 0.00  | 0.00  | 0.00  | NaN   |
| 6950 | TCP1    | 0.00  | 0.00  | 0.00  | NaN   |
| 6953 | TCP10   | 0.00  | 0.00  | 0.00  | NaN   |
| 6954 | TCP11   | 0.00  | 0.00  | 0.00  | NaN   |
| 6988 | TCTA    | -0.09 | 0.00  | -0.05 | -0.06 |
| 6992 | PPP1R11 | 0.00  | 0.00  | 0.00  | NaN   |
| 6993 | TCTEL1  | 0.00  | 0.00  | 0.00  | NaN   |
| 6996 | TDG     | 0.00  | 0.00  | 0.00  | NaN   |
| 6997 | TDGF1   | -0.09 | 0.00  | -0.05 | -0.07 |
| 6999 | TDO2    | 0.50  | 0.00  | 0.50  | 0.15  |
| 7001 | PRDX2   | 0.00  | 0.00  | 0.00  | NaN   |
| 7003 | TEAD1   | 0.00  | 0.00  | 0.00  | NaN   |
| 7004 | TEAD4   | 0.00  | 0.00  | 0.05  | 0.14  |
| 7005 | TEAD3   | 0.00  | 0.00  | 0.00  | NaN   |
| 7006 | TEC     | 0.00  | 0.00  | 0.00  | NaN   |
| 7007 | TECTA   | -0.09 | 0.00  | -0.10 | 0.24  |
| 7008 | TEF     | 0.00  | 0.00  | 0.05  | -0.11 |
| 7009 | TEGT    | 0.00  | 0.00  | 0.00  | NaN   |
| 7010 | TEK     | 0.00  | -0.13 | -0.05 | 0.21  |
| 7013 | TERF1   | 0.00  | 0.25  | 0.00  | 0.54  |
| 7014 | TERF2   | 0.00  | -0.13 | 0.05  | 0.28  |
| 7015 | TERT    | 0.00  | 0.13  | 0.10  | 0.12  |
| 7016 | TESK1   | -0.09 | 0.00  | 0.10  | 0.56  |
| 7019 | TFAM    | 0.00  | 0.00  | 0.00  | NaN   |
| 7020 | TFAP2A  | 0.00  | 0.00  | 0.05  | 0.14  |
| 7021 | TFAP2B  | 0.00  | 0.00  | 0.00  | NaN   |
| 7022 | TFAP2C  | 0.18  | 0.50  | 0.00  | 0.50  |
| 7023 | TFAP4   | 0.00  | 0.00  | 0.00  | NaN   |
| 7024 | TFCP2   | 0.00  | 0.00  | 0.00  | NaN   |
| 7025 | NR2F1   | 0.00  | 0.00  | 0.00  | NaN   |
| 7027 | TFDP1   | -0.09 | -0.13 | -0.05 | 0.45  |
| 7029 | TFDP2   | 0.00  | 0.00  | 0.00  | NaN   |
| 7031 | TFF1    | 0.00  | 0.00  | 0.00  | NaN   |
| 7032 | TFF2    | 0.00  | 0.00  | 0.00  | NaN   |
| 7033 | TFF3    | 0.00  | 0.00  | 0.00  | NaN   |

|      |        |       |       |       |       |
|------|--------|-------|-------|-------|-------|
| 7035 | TFPI   | 0.00  | 0.00  | 0.00  | NaN   |
| 7036 | TFR2   | 0.18  | 0.00  | 0.00  | 0.11  |
| 7037 | TFRC   | 0.18  | 0.00  | 0.00  | 0.34  |
| 7038 | TG     | 0.09  | 0.00  | 0.10  | 0.07  |
| 7039 | TGFA   | 0.00  | 0.13  | 0.00  | 0.15  |
| 7040 | TGFB1  | 0.00  | 0.00  | -0.05 | -0.25 |
| 7042 | TGFB2  | 0.09  | 0.00  | 0.05  | 0.10  |
| 7043 | TGFB3  | 0.00  | 0.00  | 0.00  | NaN   |
| 7044 | EBAF   | 0.09  | 0.00  | 0.00  | 0.21  |
| 7045 | TGFBI  | 0.00  | -0.13 | 0.00  | 0.06  |
| 7046 | TGFBR1 | 0.00  | 0.00  | 0.00  | NaN   |
| 7047 | TGM4   | -0.09 | 0.00  | -0.05 | 0.04  |
| 7048 | TGFBR2 | 0.00  | 0.00  | 0.00  | NaN   |
| 7049 | TGFBR3 | 0.00  | 0.00  | 0.00  | NaN   |
| 7050 | TGIF   | 0.00  | 0.00  | 0.00  | NaN   |
| 7051 | TGM1   | 0.00  | 0.00  | 0.00  | NaN   |
| 7052 | TGM2   | 0.00  | -0.13 | 0.00  | 0.02  |
| 7053 | TGM3   | 0.00  | 0.00  | 0.05  | -0.08 |
| 7054 | TH     | 0.00  | -0.13 | 0.00  | -0.03 |
| 7056 | THBD   | 0.00  | 0.00  | 0.00  | NaN   |
| 7057 | THBS1  | 0.00  | 0.00  | -0.05 | 0.09  |
| 7058 | THBS2  | 0.00  | 0.00  | 0.00  | NaN   |
| 7059 | THBS3  | 0.27  | 0.25  | 0.00  | 0.19  |
| 7060 | THBS4  | 0.00  | 0.00  | -0.05 | 0.09  |
| 7064 | THOP1  | 0.00  | 0.00  | 0.00  | NaN   |
| 7066 | THPO   | 0.50  | 0.00  | 0.00  | 0.11  |
| 7067 | THRA   | 0.00  | 0.50  | 0.00  | 0.29  |
| 7068 | THRB   | 0.00  | 0.00  | 0.00  | NaN   |
| 7070 | THY1   | -0.09 | 0.00  | -0.10 | 0.10  |
| 7071 | TIEG   | 0.18  | 0.00  | 0.00  | -0.03 |
| 7072 | TIA1   | 0.00  | 0.00  | 0.00  | NaN   |
| 7073 | TIAL1  | 0.00  | 0.00  | -0.05 | 0.24  |
| 7074 | TIAM1  | 0.00  | 0.00  | 0.00  | NaN   |
| 7075 | TIE    | 0.00  | 0.00  | 0.00  | NaN   |
| 7077 | TIMP2  | 0.00  | 0.25  | 0.00  | 0.26  |
| 7078 | TIMP3  | 0.00  | 0.00  | 0.00  | NaN   |
| 7079 | TIMP4  | 0.09  | 0.00  | 0.00  | -0.07 |
| 7080 | TITF1  | 0.00  | 0.00  | 0.00  | NaN   |
| 7082 | TJP1   | 0.00  | -0.13 | 0.00  | 0.34  |
| 7083 | TK1    | 0.00  | 0.50  | 0.00  | 0.16  |
| 7087 | ICAM5  | 0.00  | 0.00  | 0.05  | -0.03 |
| 7088 | TLE1   | 0.00  | 0.00  | 0.00  | NaN   |
| 7089 | TLE2   | 0.00  | 0.00  | 0.00  | NaN   |
| 7090 | TLE3   | 0.00  | 0.00  | 0.00  | NaN   |
| 7091 | TLE4   | 0.00  | 0.00  | 0.00  | NaN   |
| 7092 | TLL1   | 0.00  | 0.00  | 0.00  | NaN   |
| 7093 | TLL2   | 0.00  | 0.00  | -0.05 | -0.21 |



|      |          |       |       |       |       |
|------|----------|-------|-------|-------|-------|
| 7095 | TLOC1    | 0.09  | 0.00  | 0.00  | 0.30  |
| 7096 | TLR1     | 0.00  | 0.00  | 0.05  | -0.15 |
| 7097 | TLR2     | 0.00  | 0.00  | -0.05 | 0.12  |
| 7098 | TLR3     | 0.00  | 0.00  | -0.05 | 0.13  |
| 7099 | TLR4     | 0.00  | 0.00  | 0.00  | NaN   |
| 7100 | TLR5     | 0.09  | 0.00  | 0.00  | 0.40  |
| 7101 | NR2E1    | 0.00  | 0.00  | 0.10  | -0.03 |
| 7103 | TM4SF3   | 0.09  | 0.00  | 0.00  | -0.07 |
| 7104 | TM4SF4   | 0.00  | 0.00  | 0.05  | 0.16  |
| 7106 | TM4SF7   | -0.18 | -0.13 | -0.05 | 0.32  |
| 7107 | TM7SF1   | 0.09  | 0.00  | 0.00  | 0.32  |
| 7108 | TM7SF2   | -0.09 | 0.00  | 0.00  | 0.06  |
| 7109 | TMEM1    | 0.00  | 0.00  | 0.00  | NaN   |
| 7110 | TMF1     | 0.00  | 0.00  | -0.05 | 0.13  |
| 7111 | TMOD     | 0.00  | 0.00  | 0.00  | NaN   |
| 7112 | TMPO     | 0.00  | 0.13  | 0.00  | 0.28  |
| 7113 | TMPRSS2  | 0.00  | 0.00  | 0.00  | NaN   |
| 7122 | CLDN5    | -0.09 | 0.00  | 0.00  | -0.15 |
| 7123 | TNA      | -0.09 | 0.00  | -0.05 | 0.06  |
| 7124 | TNF      | 0.00  | 0.00  | 0.00  | NaN   |
| 7125 | TNNC2    | 0.00  | 0.00  | 0.00  | NaN   |
| 7126 | TNFAIP1  | 0.00  | 0.25  | 0.00  | 0.39  |
| 7127 | TNFAIP2  | 0.00  | 0.00  | 0.00  | NaN   |
| 7128 | TNFAIP3  | 0.00  | 0.00  | 0.00  | NaN   |
| 7130 | TNFAIP6  | 0.00  | 0.00  | 0.00  | NaN   |
| 7132 | TNFRSF1A | -0.09 | 0.00  | 0.00  | 0.43  |
| 7133 | TNFRSF1B | 0.00  | 0.00  | 0.00  | NaN   |
| 7134 | TNNC1    | -0.09 | -0.25 | -0.10 | 0.15  |
| 7135 | TNNI1    | 0.00  | 0.00  | 0.00  | NaN   |
| 7136 | TNNI2    | 0.00  | -0.13 | -0.05 | 0.09  |
| 7137 | TNNI3    | 0.09  | 0.00  | 0.00  | 0.33  |
| 7139 | TNNT2    | 0.00  | 0.00  | 0.00  | NaN   |
| 7140 | TNNT3    | 0.00  | -0.13 | -0.05 | -0.60 |
| 7141 | TNP1     | 0.00  | 0.00  | 0.00  | NaN   |
| 7142 | TNP2     | 0.00  | 0.00  | 0.00  | NaN   |
| 7143 | TNR      | 0.00  | 0.00  | 0.00  | NaN   |
| 7145 | TNS      | 0.00  | 0.00  | 0.00  | NaN   |
| 7148 | TNXB     | 0.00  | 0.00  | 0.00  | NaN   |
| 7150 | TOP1     | 0.18  | -0.13 | 0.00  | 0.50  |
| 7153 | TOP2A    | 0.00  | 0.38  | 0.00  | 0.40  |
| 7155 | TOP2B    | 0.00  | 0.00  | 0.00  | NaN   |
| 7156 | TOP3A    | 0.00  | 0.00  | 0.00  | NaN   |
| 7157 | TP53     | 0.00  | 0.00  | 0.05  | -0.13 |
| 7158 | TP53BP1  | 0.00  | 0.00  | 0.00  | NaN   |
| 7159 | TP53BP2  | 0.09  | 0.00  | 0.00  | 0.25  |
| 7161 | TP73     | 0.00  | 0.00  | 0.00  | NaN   |
| 7162 | TPBG     | 0.00  | 0.00  | 0.00  | NaN   |

|      |         |       |       |       |       |
|------|---------|-------|-------|-------|-------|
| 7163 | TPD52   | 0.00  | 0.25  | 0.05  | 0.51  |
| 7164 | TPD52L1 | 0.50  | 0.00  | 0.00  | 0.26  |
| 7167 | TPI1    | -0.09 | 0.00  | 0.00  | 0.39  |
| 7168 | TPM1    | 0.00  | 0.00  | 0.00  | NaN   |
| 7169 | TPM2    | -0.09 | 0.00  | 0.10  | 0.17  |
| 7171 | TPM4    | 0.00  | 0.00  | 0.00  | NaN   |
| 7172 | TPMT    | 0.00  | 0.00  | -0.05 | 0.06  |
| 7174 | TPP2    | -0.09 | -0.13 | 0.05  | 0.48  |
| 7175 | TPR     | 0.00  | 0.00  | 0.00  | NaN   |
| 7177 | TPSB1   | 0.00  | 0.00  | -0.05 | 0.03  |
| 7178 | TPT1    | 0.00  | 0.00  | -0.05 | 0.15  |
| 7179 | TPTE    | -0.18 | -0.13 | -0.25 | 0.22  |
| 7180 | TPX1    | 0.00  | 0.00  | 0.00  | NaN   |
| 7181 | NR2C1   | 0.00  | 0.13  | 0.00  | 0.34  |
| 7182 | NR2C2   | 0.00  | 0.00  | 0.05  | 0.11  |
| 7184 | TRA1    | 0.00  | 0.00  | 0.00  | NaN   |
| 7185 | TRAF1   | 0.00  | 0.00  | -0.05 | 0.11  |
| 7186 | TRAF2   | 0.00  | 0.00  | 0.00  | NaN   |
| 7187 | TRAF3   | 0.00  | 0.00  | 0.00  | NaN   |
| 7188 | TRAF5   | 0.00  | 0.00  | 0.00  | NaN   |
| 7189 | TRAF6   | 0.00  | 0.13  | 0.05  | 0.59  |
| 7200 | TRH     | 0.00  | 0.00  | 0.00  | NaN   |
| 7201 | TRHR    | 0.18  | 0.00  | 0.00  | 0.15  |
| 7203 | CCT3    | 0.00  | 0.13  | 0.00  | 0.16  |
| 7204 | TRIO    | 0.00  | 0.00  | 0.20  | 0.45  |
| 7205 | TRIP6   | 0.18  | 0.00  | 0.00  | -0.09 |
| 7220 | TRPC1   | 0.00  | 0.00  | -0.05 | 0.12  |
| 7221 | TRPC2   | 0.00  | -0.13 | 0.00  | 0.11  |
| 7222 | TRPC3   | 0.00  | 0.00  | 0.00  | NaN   |
| 7223 | TRPC4   | 0.00  | 0.00  | 0.00  | NaN   |
| 7225 | TRPC6   | 0.00  | 0.00  | 0.00  | NaN   |
| 7226 | TRPM2   | 0.00  | -0.13 | 0.00  | -0.17 |
| 7227 | TRPS1   | 0.09  | 0.25  | 0.10  | 0.27  |
| 7247 | TSN     | 0.00  | 0.00  | 0.00  | NaN   |
| 7248 | TSC1    | 0.00  | 0.00  | 0.00  | NaN   |
| 7251 | TSG101  | 0.00  | 0.00  | 0.00  | NaN   |
| 7252 | TSHB    | 0.18  | 0.00  | 0.10  | 0.03  |
| 7253 | TSHR    | 0.00  | 0.00  | 0.00  | NaN   |
| 7257 | TSNAX   | 1.00  | 0.00  | 0.00  | 0.16  |
| 7259 | TSPYL   | -0.09 | 0.00  | 0.05  | 0.60  |
| 7260 | TSSC1   | 0.00  | 0.00  | 0.00  | NaN   |
| 7262 | TSSC3   | 0.00  | -0.13 | -0.05 | 0.20  |
| 7263 | TST     | -0.09 | 0.00  | 0.00  | 0.18  |
| 7264 | TSTA3   | 0.18  | 0.00  | 0.10  | 0.25  |
| 7265 | TTC1    | 0.00  | 0.00  | -0.05 | -0.30 |
| 7266 | DNAJC7  | 0.00  | 0.13  | 0.00  | 0.40  |
| 7267 | TTC3    | 0.00  | 0.00  | 0.00  | NaN   |

|      |         |       |       |       |       |
|------|---------|-------|-------|-------|-------|
| 7268 | TTC4    | 0.00  | 0.00  | 0.00  | NaN   |
| 7272 | TTK     | 0.00  | 0.00  | 0.00  | NaN   |
| 7273 | TTN     | 0.00  | 0.00  | 0.05  | -0.11 |
| 7274 | TTPA    | 0.00  | 0.00  | 0.00  | NaN   |
| 7275 | TUB     | 0.00  | 0.00  | -0.05 | 0.25  |
| 7276 | TTR     | 0.00  | 0.00  | -0.10 | -0.04 |
| 7277 | TUBA1   | 0.00  | 0.00  | 0.00  | NaN   |
| 7278 | TUBA2   | 0.00  | 0.00  | 0.00  | 0.16  |
| 7280 | TUBB    | 0.00  | 0.00  | 0.00  | 0.20  |
| 7283 | TUBG1   | 0.00  | -0.13 | 0.00  | 0.10  |
| 7284 | TUFM    | 0.00  | 0.00  | 0.00  | NaN   |
| 7286 | TUFT1   | 0.00  | 0.00  | 0.05  | 0.11  |
| 7287 | TULP1   | 0.00  | 0.00  | 0.00  | NaN   |
| 7288 | TULP2   | 0.09  | 0.00  | 0.00  | -0.03 |
| 7289 | TULP3   | 0.00  | 0.00  | 0.05  | 0.38  |
| 7290 | HIRA    | -0.09 | 0.00  | 0.00  | 0.36  |
| 7291 | TWIST   | 0.00  | 0.13  | 0.05  | 0.15  |
| 7292 | TNFSF4  | 0.00  | 0.00  | 0.00  | NaN   |
| 7293 | TNFRSF4 | 0.00  | 0.00  | 0.00  | NaN   |
| 7294 | TXK     | 0.00  | 0.00  | 0.00  | NaN   |
| 7295 | TXN     | 0.00  | 0.00  | 0.00  | NaN   |
| 7296 | TXNRD1  | 0.00  | 0.00  | 0.00  | NaN   |
| 7297 | TYK2    | 0.00  | 0.00  | 0.05  | 0.45  |
| 7298 | TYMS    | 0.00  | 0.00  | 0.00  | NaN   |
| 7299 | TYR     | 0.00  | 0.00  | 0.05  | -0.02 |
| 7301 | TYRO3   | 0.00  | 0.00  | 0.00  | NaN   |
| 7305 | TYROBP  | 0.00  | 0.00  | 0.00  | NaN   |
| 7306 | TYRP1   | 0.00  | 0.00  | 0.05  | 0.10  |
| 7307 | U2AF1   | 0.00  | 0.13  | 0.00  | -0.11 |
| 7311 | UBA52   | 0.00  | 0.00  | 0.00  | NaN   |
| 7314 | UBB     | 0.00  | 0.00  | 0.00  | -0.18 |
| 7318 | UBE1L   | -0.09 | 0.00  | -0.05 | 0.10  |
| 7320 | UBE2B   | 0.00  | -0.13 | 0.00  | 0.43  |
| 7321 | UBE2D1  | 0.00  | 0.00  | 0.05  | -0.08 |
| 7322 | UBE2D2  | 0.00  | 0.00  | 0.00  | NaN   |
| 7323 | UBE2D3  | 0.00  | 0.00  | -0.05 | 0.21  |
| 7324 | UBE2E1  | 0.00  | 0.00  | 0.00  | NaN   |
| 7326 | UBE2G1  | 0.00  | 0.00  | 0.00  | NaN   |
| 7327 | UBE2G2  | 0.00  | 0.00  | 0.00  | NaN   |
| 7328 | UBE2H   | 0.00  | 0.25  | 0.05  | 0.26  |
| 7329 | UBE2I   | 0.00  | 0.00  | -0.05 | 0.52  |
| 7332 | UBE2L3  | 0.00  | 0.00  | 0.00  | NaN   |
| 7334 | UBE2N   | 0.00  | 0.13  | 0.00  | 0.51  |
| 7336 | UBE2V2  | 0.00  | 0.00  | 0.00  | NaN   |
| 7337 | UBE3A   | 0.00  | 0.00  | 0.00  | NaN   |
| 7341 | UBL1    | 0.50  | 0.00  | 0.50  | 0.13  |
| 7342 | UBP1    | 0.00  | 0.00  | 0.00  | NaN   |

|      |         |       |       |       |       |
|------|---------|-------|-------|-------|-------|
| 7343 | UBTF    | 0.00  | -0.13 | 0.00  | 0.28  |
| 7345 | UCHL1   | 0.00  | 0.00  | 0.05  | 0.39  |
| 7347 | UCHL3   | -0.09 | 0.13  | -0.15 | 0.62  |
| 7348 | UPK1B   | 0.00  | 0.00  | 0.00  | NaN   |
| 7349 | UCN     | 0.09  | 0.00  | 0.05  | 0.21  |
| 7350 | UCP1    | 0.00  | 0.00  | 0.00  | NaN   |
| 7351 | UCP2    | 0.18  | 0.13  | 0.00  | 0.40  |
| 7352 | UCP3    | 0.18  | 0.13  | 0.00  | 0.14  |
| 7353 | UFD1L   | -0.09 | 0.00  | 0.00  | 0.15  |
| 7356 | SCGB1A1 | 0.00  | 0.00  | 0.00  | NaN   |
| 7357 | UGCG    | 0.00  | 0.00  | 0.00  | NaN   |
| 7358 | UGDH    | 0.00  | 0.00  | 0.00  | NaN   |
| 7360 | UGP2    | 0.00  | 0.00  | 0.00  | NaN   |
| 7363 | UGT2B4  | 0.00  | 0.00  | 0.00  | NaN   |
| 7365 | UGT2B10 | 0.00  | 0.00  | 0.05  | -0.02 |
| 7366 | UGT2B15 | 0.00  | 0.00  | 0.05  | 0.01  |
| 7367 | UGT2B17 | -0.18 | -0.13 | 0.00  | 0.21  |
| 7368 | UGT8    | 0.00  | 0.00  | 0.00  | NaN   |
| 7369 | UMOD    | 0.00  | 0.00  | 0.00  | NaN   |
| 7371 | UMPK    | 0.00  | 0.00  | 0.00  | NaN   |
| 7372 | UMPS    | 0.00  | 0.00  | 0.00  | NaN   |
| 7373 | COL14A1 | 0.00  | 0.25  | 0.15  | 0.14  |
| 7374 | UNG     | 0.00  | 0.00  | 0.00  | NaN   |
| 7375 | USP4    | -0.09 | 0.00  | -0.05 | 0.43  |
| 7376 | NR1H2   | 0.00  | 0.00  | 0.00  | NaN   |
| 7378 | UP      | 0.00  | 0.00  | 0.00  | NaN   |
| 7379 | UPK2    | 0.00  | 0.00  | 0.00  | NaN   |
| 7380 | UPK3    | 0.00  | 0.00  | 0.00  | NaN   |
| 7381 | UQCRB   | 0.00  | -0.13 | 0.05  | 0.61  |
| 7384 | UQCRC1  | -0.09 | 0.00  | -0.05 | 0.30  |
| 7385 | UQCRC2  | 0.00  | 0.00  | 0.00  | NaN   |
| 7386 | UQCRFS1 | 0.00  | 0.13  | 0.10  | 0.70  |
| 7388 | UQCRH   | 0.00  | 0.00  | 0.00  | NaN   |
| 7389 | UROD    | 0.00  | 0.00  | 0.00  | NaN   |
| 7390 | UROS    | 0.00  | 0.00  | -0.05 | 0.26  |
| 7392 | USF2    | 0.00  | 0.00  | 0.00  | NaN   |
| 7398 | USP1    | 0.00  | 0.00  | 0.00  | NaN   |
| 7399 | USH2A   | 0.09  | 0.00  | 0.00  | 0.28  |
| 7402 | UTRN    | 0.00  | 0.00  | 0.00  | NaN   |
| 7405 | UVRAG   | 0.09  | 0.00  | 0.00  | 0.60  |
| 7407 | VARS2   | 0.00  | 0.00  | 0.00  | NaN   |
| 7408 | VASP    | 0.09  | 0.00  | 0.00  | -0.01 |
| 7409 | VAV1    | 0.00  | 0.00  | 0.00  | NaN   |
| 7410 | VAV2    | 0.00  | 0.00  | 0.00  | NaN   |
| 7412 | VCAM1   | 0.09  | 0.00  | 0.00  | -0.04 |
| 7414 | VCL     | 0.09  | 0.00  | 0.00  | 0.14  |
| 7415 | VCP     | -0.09 | 0.13  | 0.10  | 0.67  |

|      |        |       |       |       |       |
|------|--------|-------|-------|-------|-------|
| 7416 | VDAC1  | 0.00  | -0.13 | 0.00  | 0.28  |
| 7419 | VDAC3  | 0.36  | 0.00  | -0.05 | 0.77  |
| 7422 | VEGF   | 0.00  | 0.00  | 0.00  | NaN   |
| 7423 | VEGFB  | 0.00  | 0.00  | 0.00  | NaN   |
| 7424 | VEGFC  | 0.00  | 0.13  | -0.10 | 0.17  |
| 7425 | VGFB   | 0.18  | 0.00  | 0.00  | 0.47  |
| 7428 | VHL    | 0.00  | 0.00  | 0.00  | NaN   |
| 7429 | VIL1   | 0.00  | 0.00  | 0.00  | NaN   |
| 7430 | VIL2   | 0.00  | 0.00  | 0.00  | NaN   |
| 7431 | VIM    | 0.00  | 0.00  | 0.05  | 0.00  |
| 7432 | VIP    | 0.00  | 0.00  | 0.00  | NaN   |
| 7433 | VIPR1  | 0.00  | 0.00  | -0.05 | 0.13  |
| 7434 | VIPR2  | 0.00  | 0.00  | -0.05 | 0.19  |
| 7436 | VLDLR  | 0.00  | 1.00  | 1.00  | 0.34  |
| 7439 | VMD2   | -0.09 | 0.00  | 0.00  | -0.21 |
| 7441 | VPREB1 | 0.00  | 0.00  | 0.00  | NaN   |
| 7442 | TRPV1  | 0.00  | 0.00  | 0.00  | NaN   |
| 7443 | VRK1   | 0.00  | 0.00  | 0.00  | NaN   |
| 7444 | VRK2   | 0.00  | 0.00  | 0.00  | NaN   |
| 7447 | VSNL1  | 0.09  | 0.00  | -0.10 | -0.15 |
| 7448 | VTN    | 0.00  | 0.25  | 0.00  | 0.45  |
| 7450 | VWF    | -0.09 | 0.00  | 0.00  | -0.09 |
| 7453 | WARS   | 0.00  | 0.00  | 0.00  | NaN   |
| 7456 | WASPIP | 0.00  | 0.00  | 0.00  | NaN   |
| 7458 | WBSCR1 | -0.09 | 0.00  | 0.00  | 0.37  |
| 7461 | CYLN2  | -0.09 | 0.00  | 0.00  | 0.09  |
| 7462 | WBSCR5 | -0.09 | 0.00  | 0.00  | -0.12 |
| 7464 | CORO2A | 0.00  | 0.00  | 0.00  | NaN   |
| 7465 | WEE1   | 0.00  | 0.00  | 0.00  | NaN   |
| 7466 | WFS1   | 0.00  | -0.13 | -0.10 | 0.20  |
| 7468 | WHSC1  | 0.00  | -0.13 | -0.15 | 0.46  |
| 7469 | WHSC2  | 0.00  | -0.13 | -0.15 | 0.56  |
| 7471 | WNT1   | 0.00  | 0.00  | 0.00  | NaN   |
| 7472 | WNT2   | 0.00  | 0.25  | 0.00  | 0.12  |
| 7473 | WNT3   | 0.00  | -0.13 | 0.00  | -0.09 |
| 7474 | WNT5A  | 0.00  | 0.00  | -0.10 | -0.05 |
| 7475 | WNT6   | 0.00  | 0.00  | 0.00  | NaN   |
| 7476 | WNT7A  | 0.00  | 0.00  | 0.00  | NaN   |
| 7477 | WNT7B  | 0.00  | 0.00  | 0.00  | NaN   |
| 7479 | WNT8B  | 0.00  | -0.13 | -0.05 | -0.09 |
| 7480 | WNT10B | 0.00  | 0.00  | 0.00  | NaN   |
| 7481 | WNT11  | 0.18  | 0.00  | 0.00  | 0.01  |
| 7482 | WNT2B  | 0.09  | 0.00  | 0.05  | 0.08  |
| 7485 | WRB    | 0.00  | 0.00  | 0.00  | NaN   |
| 7486 | WRN    | -0.09 | -0.25 | -0.05 | 0.43  |
| 7490 | WT1    | 0.00  | 0.00  | 0.00  | NaN   |
| 7494 | XBP1   | -0.09 | 0.00  | 0.00  | -0.19 |

|      |         |       |       |       |       |
|------|---------|-------|-------|-------|-------|
| 7498 | XDH     | 0.00  | 0.00  | 0.00  | NaN   |
| 7507 | XPA     | 0.00  | 0.00  | 0.00  | NaN   |
| 7508 | XPC     | 0.00  | 0.00  | 0.00  | NaN   |
| 7511 | XPNPEP1 | 0.00  | 0.00  | -0.05 | 0.24  |
| 7514 | XPO1    | 0.00  | 0.00  | 0.00  | NaN   |
| 7515 | XRCC1   | 0.09  | 0.00  | -0.10 | 0.48  |
| 7516 | XRCC2   | 0.00  | 0.00  | -0.05 | 0.07  |
| 7518 | XRCC4   | 0.00  | -0.13 | 0.00  | 0.32  |
| 7520 | XRCC5   | 0.00  | 0.00  | 0.00  | NaN   |
| 7525 | YES1    | 0.00  | 0.00  | 0.00  | NaN   |
| 7528 | YY1     | 0.00  | 0.00  | 0.00  | NaN   |
| 7529 | YWHAB   | 0.09  | 0.13  | 0.00  | 0.48  |
| 7531 | YWHAE   | 0.00  | -0.13 | 0.00  | 0.17  |
| 7533 | YWHAH   | 0.00  | 0.00  | 0.00  | NaN   |
| 7534 | YWHAZ   | 0.18  | 0.00  | 0.00  | 0.25  |
| 7535 | ZAP70   | 0.00  | 0.00  | 0.00  | NaN   |
| 7538 | ZFP36   | 0.00  | 0.00  | 0.00  | NaN   |
| 7539 | ZFP37   | 0.00  | 0.00  | 0.00  | NaN   |
| 7541 | ZFP161  | 0.00  | 0.00  | 0.00  | NaN   |
| 7542 | ZFPL1   | -0.09 | 0.00  | 0.00  | 0.19  |
| 7545 | ZIC1    | 0.00  | 0.00  | 0.00  | NaN   |
| 7553 | ZNF7    | 0.18  | 0.00  | 0.10  | 0.60  |
| 7554 | ZNF8    | 0.00  | 0.13  | 0.05  | 0.68  |
| 7555 | ZNF9    | 0.00  | 0.00  | 0.00  | NaN   |
| 7556 | ZNF10   | 0.00  | 0.00  | 0.00  | NaN   |
| 7561 | ZNF14   | 0.00  | 0.00  | 0.00  | NaN   |
| 7564 | ZNF16   | 0.18  | 0.00  | 0.10  | 0.31  |
| 7568 | ZNF20   | 0.00  | 0.00  | 0.00  | NaN   |
| 7570 | ZNF22   | 0.00  | 0.00  | 0.00  | NaN   |
| 7571 | ZNF23   | -0.09 | 0.13  | 0.05  | 0.47  |
| 7572 | ZNF24   | 0.00  | 0.00  | -0.20 | 0.59  |
| 7574 | ZNF26   | 0.00  | 0.00  | 0.00  | NaN   |
| 7584 | ZNF35   | -0.09 | 0.00  | -0.05 | 0.15  |
| 7586 | ZNF36   | 0.18  | 0.00  | 0.00  | 0.27  |
| 7587 | ZNF37A  | 0.00  | 0.00  | 0.00  | NaN   |
| 7589 | ZNF38   | 0.18  | 0.00  | 0.00  | 0.38  |
| 7593 | ZNF42   | 0.00  | 0.13  | 0.00  | 0.50  |
| 7594 | ZNF43   | 0.00  | -0.25 | 0.00  | 0.31  |
| 7596 | ZNF45   | 0.09  | 0.00  | -0.05 | 0.47  |
| 7597 | ZNF46   | 0.09  | 0.00  | 0.00  | -0.04 |
| 7625 | ZNF74   | 0.00  | 0.13  | 0.05  | 0.31  |
| 7629 | ZNF76   | 0.00  | 0.00  | 0.00  | NaN   |
| 7633 | ZNF79   | 0.00  | 0.00  | -0.05 | 0.14  |
| 7634 | ZNF80   | 0.00  | 0.00  | 0.00  | NaN   |
| 7637 | ZNF84   | 0.00  | 0.00  | 0.00  | NaN   |
| 7638 | ZNF221  | 0.09  | 0.00  | 0.00  | 0.36  |
| 7639 | ZNF85   | 0.00  | -0.25 | 0.00  | 0.28  |

|      |        |       |       |       |       |
|------|--------|-------|-------|-------|-------|
| 7644 | ZNF91  | 0.00  | -0.25 | 0.00  | 0.30  |
| 7673 | ZNF222 | 0.09  | 0.00  | 0.00  | 0.41  |
| 7678 | ZNF124 | 0.00  | 0.13  | 0.00  | 0.12  |
| 7681 | MKRN3  | 0.00  | -0.13 | 0.00  | -0.15 |
| 7690 | ZNF131 | 0.00  | 0.00  | 0.05  | 0.23  |
| 7691 | ZNF132 | 0.00  | 0.13  | 0.05  | 0.16  |
| 7692 | ZNF133 | 0.00  | 0.00  | 0.00  | NaN   |
| 7693 | ZNF134 | 0.00  | 0.13  | 0.00  | 0.24  |
| 7695 | ZNF136 | 0.00  | 0.00  | 0.00  | NaN   |
| 7696 | ZNF137 | 0.09  | 0.00  | -0.05 | 0.16  |
| 7699 | ZNF140 | 0.00  | 0.00  | 0.00  | NaN   |
| 7700 | ZNF141 | 0.00  | -0.13 | -0.10 | 0.28  |
| 7701 | ZNF142 | 0.00  | 0.00  | 0.00  | NaN   |
| 7702 | ZNF143 | 0.00  | 0.00  | 0.00  | NaN   |
| 7703 | ZNF144 | 0.00  | 0.38  | 0.00  | 0.76  |
| 7704 | ZNF145 | -0.09 | 0.00  | 0.00  | 0.10  |
| 7705 | ZNF146 | 0.00  | 0.00  | 0.00  | NaN   |
| 7706 | ZNF147 | 0.09  | -0.13 | 0.00  | 0.27  |
| 7707 | ZNF148 | 0.00  | 0.00  | 0.00  | NaN   |
| 7709 | ZNF151 | 0.00  | 0.00  | 0.00  | NaN   |
| 7710 | ZNF154 | 0.00  | 0.13  | 0.00  | 0.27  |
| 7711 | ZNF155 | 0.09  | 0.00  | 0.00  | 0.44  |
| 7716 | ZNF161 | 0.09  | -0.13 | 0.00  | 0.36  |
| 7718 | ZNF165 | 0.00  | 0.00  | 0.00  | NaN   |
| 7726 | TRIM26 | 0.00  | 0.00  | 0.00  | NaN   |
| 7727 | ZNF174 | 0.00  | 0.00  | 0.00  | NaN   |
| 7728 | ZNF175 | 0.00  | 0.13  | -0.05 | 0.48  |
| 7730 | ZNF177 | 0.50  | 0.50  | 0.50  | 0.19  |
| 7733 | ZNF180 | 0.09  | 0.00  | 0.00  | 0.41  |
| 7738 | ZNF184 | 0.00  | 0.00  | 0.00  | NaN   |
| 7741 | ZNF187 | 0.00  | 0.00  | 0.00  | NaN   |
| 7743 | ZNF189 | 0.00  | 0.00  | 0.00  | NaN   |
| 7745 | ZNF192 | 0.00  | 0.00  | 0.00  | NaN   |
| 7746 | ZNF193 | 0.00  | 0.00  | 0.00  | NaN   |
| 7748 | ZNF195 | 0.00  | -0.13 | 0.00  | 0.12  |
| 7750 | ZNF198 | 0.00  | 0.00  | -0.05 | 0.35  |
| 7752 | ZNF200 | 0.00  | 0.00  | 0.00  | NaN   |
| 7753 | ZNF202 | 0.00  | 0.00  | -0.05 | 0.11  |
| 7755 | ZNF205 | 0.00  | 0.00  | 0.00  | NaN   |
| 7756 | ZNF207 | 0.00  | 0.00  | 0.00  | NaN   |
| 7757 | ZNF208 | 0.00  | -0.25 | 0.00  | -0.16 |
| 7761 | ZNF214 | 0.00  | 0.00  | 0.00  | NaN   |
| 7762 | ZNF215 | 0.00  | 0.00  | 0.00  | NaN   |
| 7763 | ZNF216 | 0.00  | 0.00  | -0.05 | 0.06  |
| 7764 | ZNF217 | 0.18  | 0.50  | 0.00  | 0.42  |
| 7766 | ZNF223 | 0.09  | 0.00  | 0.00  | 0.06  |
| 7769 | ZNF226 | 0.09  | 0.00  | 0.00  | 0.10  |

|      |          |       |       |       |       |
|------|----------|-------|-------|-------|-------|
| 7773 | ZNF230   | 0.09  | 0.00  | 0.00  | 0.47  |
| 7775 | ZNF232   | 0.18  | 0.00  | 0.00  | -0.26 |
| 7776 | ZNF236   | -0.09 | 0.00  | -0.25 | 0.37  |
| 7781 | SLC30A3  | 0.09  | 0.00  | 0.05  | 0.04  |
| 7782 | SLC30A4  | 0.00  | 0.00  | 0.00  | NaN   |
| 7783 | ZP2      | 0.00  | 0.00  | 0.00  | NaN   |
| 7786 | MAP3K12  | 0.00  | 0.00  | 0.00  | NaN   |
| 7791 | ZYX      | 0.00  | 0.00  | -0.05 | 0.21  |
| 7799 | PRDM2    | 0.00  | 0.00  | 0.00  | NaN   |
| 7802 | P28      | 0.00  | 0.00  | 0.00  | NaN   |
| 7803 | PTP4A1   | -0.09 | 0.13  | 0.00  | 0.25  |
| 7804 | LRP8     | 0.00  | 0.00  | 0.00  | NaN   |
| 7805 | LAPTM5   | 0.00  | 0.00  | 0.00  | NaN   |
| 7812 | D1S155E  | 0.18  | 0.00  | 0.10  | 0.78  |
| 7813 | EVI5     | 0.00  | 0.00  | 0.05  | 0.56  |
| 7818 | DAP3     | 0.09  | 0.13  | 0.00  | 0.26  |
| 7827 | NPHS2    | 0.00  | 0.00  | 0.00  | NaN   |
| 7832 | BTG2     | 0.00  | 0.13  | 0.00  | 0.49  |
| 7837 | D2S448   | 0.00  | 0.00  | 0.00  | NaN   |
| 7840 | ALMS1    | 0.00  | 0.00  | 0.00  | NaN   |
| 7841 | GCS1     | 0.00  | 0.00  | 0.00  | NaN   |
| 7844 | ZFP103   | 0.00  | 0.00  | -0.05 | 0.31  |
| 7846 | TUBA3    | 0.00  | 0.00  | 0.00  | NaN   |
| 7849 | PAX8     | 0.00  | 0.00  | 0.00  | NaN   |
| 7850 | IL1R2    | 0.00  | 0.00  | 0.00  | NaN   |
| 7851 | BENE     | 0.09  | 0.00  | 0.00  | -0.08 |
| 7852 | CXCR4    | 0.00  | 0.00  | 0.00  | 0.12  |
| 7855 | FZD5     | 0.00  | 0.00  | 0.00  | NaN   |
| 7862 | BRPF1    | 0.00  | 0.00  | 0.00  | NaN   |
| 7866 | IFRD2    | -0.09 | 0.00  | -0.05 | 0.39  |
| 7867 | MAPKAPK3 | -0.09 | 0.00  | -0.05 | 0.32  |
| 7869 | SEMA3B   | -0.09 | 0.00  | -0.05 | 0.17  |
| 7873 | ARMET    | -0.09 | 0.00  | -0.10 | -0.07 |
| 7874 | USP7     | 0.00  | 0.00  | 0.00  | NaN   |
| 7879 | RAB7     | 0.00  | 0.00  | 0.00  | NaN   |
| 7881 | KCNAB1   | 0.00  | 0.00  | 0.00  | NaN   |
| 7884 | SLBP     | 0.00  | -0.13 | -0.15 | 0.41  |
| 7903 | SIAT8D   | 0.00  | 0.00  | 0.00  | NaN   |
| 7905 | D5S346   | 0.00  | 0.00  | 0.05  | 0.09  |
| 7913 | DEK      | 0.00  | 0.00  | 0.05  | -0.35 |
| 7915 | ALDH5A1  | 0.00  | 0.00  | 0.05  | 0.09  |
| 7916 | BAT2     | 0.00  | 0.00  | 0.00  | NaN   |
| 7917 | BAT3     | 0.00  | 0.00  | 0.00  | NaN   |
| 7919 | BAT1     | 0.00  | 0.00  | 0.00  | NaN   |
| 7922 | HKE4     | 0.09  | 0.00  | 0.00  | 0.03  |
| 7932 | OR2H3    | 0.00  | 0.00  | 0.00  | NaN   |
| 7936 | RDBP     | 0.00  | 0.00  | 0.00  | NaN   |



|      |          |       |       |       |       |
|------|----------|-------|-------|-------|-------|
| 7941 | PLA2G7   | 0.00  | 0.00  | 0.00  | NaN   |
| 7957 | EPM2A    | 0.00  | -0.13 | 0.05  | 0.67  |
| 7965 | JTV1     | 0.00  | 0.00  | 0.10  | 0.35  |
| 7975 | MAFK     | 0.00  | 0.13  | 0.05  | 0.35  |
| 7976 | FZD3     | -0.09 | -0.25 | -0.05 | 0.13  |
| 7978 | MTERF    | 0.18  | 0.00  | 0.00  | 0.73  |
| 7979 | DSS1     | 0.50  | 0.00  | 0.00  | 0.60  |
| 7980 | TFPI2    | 0.18  | 0.00  | 0.00  | -0.20 |
| 7982 | ST7      | 0.00  | 0.25  | 0.00  | 0.63  |
| 7984 | ARHGEF5  | 0.00  | 0.00  | -0.05 | -0.02 |
| 7988 | ZNF212   | 0.00  | 0.00  | -0.05 | 0.34  |
| 7991 | N33      | 0.00  | -0.13 | -0.05 | 0.45  |
| 7993 | D8S2298E | -0.09 | -0.25 | -0.05 | 0.32  |
| 7994 | ZNF220   | 0.36  | -0.13 | -0.05 | 0.67  |
| 8000 | PSCA     | 0.18  | 0.13  | 0.05  | -0.17 |
| 8001 | GLRA3    | 0.00  | 0.00  | -0.05 | 0.18  |
| 8013 | NR4A3    | 0.00  | 0.00  | 0.00  | NaN   |
| 8019 | BRD3     | 0.00  | 0.00  | 0.00  | NaN   |
| 8021 | NUP214   | 0.00  | 0.00  | 0.00  | NaN   |
| 8022 | LHX3     | 0.00  | 0.00  | 0.00  | NaN   |
| 8027 | STAM     | 0.00  | 0.00  | 0.05  | 0.27  |
| 8028 | MLLT10   | -0.09 | 0.00  | 0.05  | 0.55  |
| 8029 | CUBN     | 0.00  | 0.00  | 0.05  | -0.12 |
| 8030 | D10S170  | 0.00  | -0.13 | 0.05  | 0.05  |
| 8031 | NCOA4    | 0.00  | 0.00  | 0.00  | NaN   |
| 8034 | SLC25A16 | 0.00  | 0.00  | 0.00  | 0.24  |
| 8036 | SHOC2    | 0.00  | 0.00  | -0.05 | 0.25  |
| 8038 | ADAM12   | 0.00  | 0.00  | -0.05 | 0.04  |
| 8045 | C11orf13 | -0.27 | -0.13 | -0.05 | 0.30  |
| 8048 | CSRP3    | 0.00  | 0.00  | 0.50  | 0.00  |
| 8050 | PDX1     | 0.00  | 0.13  | 0.05  | 0.53  |
| 8061 | FOSL1    | -0.09 | 0.00  | 0.05  | 0.27  |
| 8065 | CUL5     | 0.00  | 0.00  | 0.00  | NaN   |
| 8073 | PTP4A2   | 0.00  | 0.00  | 0.00  | NaN   |
| 8074 | FGF23    | -0.09 | 0.00  | 0.05  | -0.09 |
| 8076 | MAGP2    | -0.09 | 0.00  | 0.00  | 0.14  |
| 8078 | USP5     | -0.09 | 0.00  | 0.00  | 0.22  |
| 8079 | MLF2     | 0.00  | 0.50  | 0.00  | 0.41  |
| 8082 | SSPN     | 0.00  | 0.00  | 0.00  | NaN   |
| 8085 | MLL2     | 0.00  | 0.00  | 0.00  | NaN   |
| 8086 | AAAS     | 0.00  | 0.00  | 0.00  | NaN   |
| 8087 | FXR1     | 0.09  | 0.00  | 0.00  | 0.32  |
| 8089 | GAS41    | 0.09  | 0.00  | 0.00  | 0.37  |
| 8092 | CART1    | 0.00  | 0.13  | 0.00  | -0.04 |
| 8099 | CDK2AP1  | 0.00  | 0.00  | 0.00  | NaN   |
| 8100 | TG737    | 0.00  | 0.00  | -0.10 | 0.07  |
| 8106 | PABPN1   | 0.00  | 0.00  | 0.00  | NaN   |

|      |          |       |       |       |       |
|------|----------|-------|-------|-------|-------|
| 8110 | CERD4    | 0.00  | 0.00  | 0.00  | NaN   |
| 8111 | GPR68    | 0.00  | 0.13  | 0.00  | 0.12  |
| 8115 | TCL1A    | 0.00  | 0.00  | 0.00  | NaN   |
| 8120 | AP3B2    | 0.00  | 0.00  | -0.05 | 0.07  |
| 8123 | D15S226E | 0.00  | 0.00  | 0.00  | NaN   |
| 8125 | ANP32A   | 0.00  | 0.00  | -0.05 | 0.57  |
| 8128 | SIAT8B   | 0.00  | 0.00  | 0.00  | NaN   |
| 8131 | CGTHBA   | 0.00  | 0.00  | 0.00  | 0.10  |
| 8139 | GAN      | -0.09 | 0.00  | -0.05 | 0.21  |
| 8140 | SLC7A5   | -0.09 | -0.13 | -0.05 | 0.25  |
| 8148 | TAF15    | 0.00  | 0.00  | 0.00  | 0.34  |
| 8153 | RHO7     | 0.00  | -0.13 | 0.00  | 0.05  |
| 8161 | COIL     | 0.09  | -0.13 | 0.00  | 0.32  |
| 8165 | AKAP1    | 0.09  | -0.13 | 0.00  | 0.15  |
| 8170 | SLC14A2  | -0.09 | -0.13 | -0.20 | -0.01 |
| 8174 | MADCAM1  | 0.00  | 0.00  | -0.05 | -0.01 |
| 8175 | SF3A2    | 0.00  | 0.00  | 0.00  | NaN   |
| 8178 | ELL      | 0.00  | 0.00  | 0.00  | NaN   |
| 8187 | ZNF239   | 0.00  | 0.00  | 0.00  | NaN   |
| 8189 | SPK      | 0.09  | 0.00  | 0.00  | 0.42  |
| 8190 | MIA      | 0.00  | 0.00  | 0.00  | NaN   |
| 8192 | CLPP     | 0.00  | 0.00  | 0.00  | NaN   |
| 8193 | NEUD4    | 0.00  | 0.13  | 0.00  | 0.46  |
| 8195 | MKKS     | 0.00  | 0.00  | 0.05  | 0.59  |
| 8200 | GDF5     | 0.00  | 0.13  | 0.00  | 0.45  |
| 8202 | NCOA3    | 0.18  | 0.13  | 0.00  | 0.92  |
| 8204 | NRIP1    | 0.00  | -0.13 | -0.05 | 0.50  |
| 8208 | CHAF1B   | 0.00  | 0.00  | 0.50  | 0.00  |
| 8209 | C21orf33 | 0.00  | 0.00  | 0.00  | NaN   |
| 8214 | DGCR6    | 0.00  | 0.00  | -0.05 | -0.07 |
| 8216 | LZTR1    | 0.00  | 0.13  | 0.00  | 0.22  |
| 8218 | CLTCL1   | -0.09 | 0.00  | 0.00  | 0.04  |
| 8220 | DGSI     | -0.09 | 0.00  | 0.00  | 0.43  |
| 8224 | SYN3     | 0.00  | 0.00  | 0.00  | NaN   |
| 8288 | EPX      | 0.09  | -0.13 | 0.00  | -0.07 |
| 8289 | SMARCF1  | -0.09 | 0.00  | 0.00  | 0.16  |
| 8290 | H3FT     | 0.09  | 0.00  | 0.00  | -0.17 |
| 8291 | DYSF     | 0.00  | 0.00  | 0.00  | NaN   |
| 8292 | COLQ     | 0.00  | 0.00  | 0.05  | -0.20 |
| 8294 | H4FM     | 0.00  | 0.00  | 0.15  | 0.19  |
| 8295 | TRRAP    | 0.18  | 0.00  | 0.00  | 0.36  |
| 8301 | PICALM   | 0.00  | 0.00  | 0.00  | NaN   |
| 8302 | KLRC4    | -0.09 | 0.00  | 0.00  | 0.29  |
| 8303 | SNN      | 0.00  | 0.00  | -0.05 | 0.22  |
| 8309 | ACOX2    | 0.00  | -0.13 | -0.15 | 0.14  |
| 8310 | ACOX3    | 0.00  | -0.13 | -0.10 | 0.36  |
| 8312 | AXIN1    | 0.00  | 0.00  | -0.05 | 0.22  |

|      |          |       |      |       |       |
|------|----------|-------|------|-------|-------|
| 8315 | BRAP     | 0.00  | 0.00 | 0.00  | NaN   |
| 8317 | CDC7L1   | 0.00  | 0.00 | 0.05  | 0.38  |
| 8318 | CDC45L   | -0.09 | 0.00 | 0.00  | 0.32  |
| 8321 | FZD1     | 0.09  | 0.00 | 0.00  | 0.33  |
| 8322 | FZD4     | 0.00  | 0.00 | 0.00  | NaN   |
| 8323 | FZD6     | 0.18  | 0.00 | 0.00  | 0.08  |
| 8324 | FZD7     | 0.00  | 0.00 | 0.00  | NaN   |
| 8326 | FZD9     | -0.09 | 0.00 | 0.00  | -0.03 |
| 8328 | GFI1B    | 0.00  | 0.00 | 0.00  | NaN   |
| 8329 | H2AFC    | 0.00  | 0.00 | 0.00  | NaN   |
| 8330 | H2AFD    | 0.00  | 0.00 | 0.00  | NaN   |
| 8337 | H2AFO    | 0.00  | 0.00 | 0.05  | -0.05 |
| 8339 | H2BFA    | 0.00  | 0.00 | 0.00  | 0.19  |
| 8340 | H2BFC    | 0.00  | 0.00 | 0.00  | NaN   |
| 8341 | H2BFD    | 0.00  | 0.00 | 0.00  | NaN   |
| 8342 | H2BFE    | 0.00  | 0.00 | 0.00  | NaN   |
| 8344 | H2BFH    | 0.00  | 0.00 | -0.05 | -0.03 |
| 8345 | H2BFJ    | 0.00  | 0.00 | 0.00  | NaN   |
| 8347 | H2BFL    | 0.00  | 0.00 | -0.05 | 0.11  |
| 8348 | H2BFN    | 0.00  | 0.00 | 0.00  | NaN   |
| 8349 | H2BFQ    | 0.00  | 0.00 | 0.10  | -0.19 |
| 8350 | H3FA     | 0.00  | 0.00 | 0.38  | 0.30  |
| 8369 | H4FL     | 0.00  | 0.00 | 0.00  | NaN   |
| 8379 | MAD1L1   | 0.00  | 0.13 | 0.05  | 0.32  |
| 8382 | NME5     | 0.00  | 0.00 | 0.00  | NaN   |
| 8383 | OR1A1    | 0.00  | 0.00 | 0.00  | NaN   |
| 8385 | OR1D4    | 0.00  | 0.00 | 0.00  | NaN   |
| 8387 | OR1E1    | 0.00  | 0.00 | 0.00  | NaN   |
| 8388 | OR1E2    | 0.00  | 0.00 | 0.00  | NaN   |
| 8390 | OR1G1    | 0.00  | 0.00 | 0.00  | NaN   |
| 8392 | OR3A3    | 0.00  | 0.00 | 0.00  | NaN   |
| 8394 | PIP5K1A  | 0.00  | 0.00 | 0.05  | 0.11  |
| 8395 | PIP5K1B  | 0.00  | 0.00 | -0.05 | 0.09  |
| 8396 | PIP5K2B  | 0.00  | 0.38 | 0.00  | 0.76  |
| 8398 | PLA2G6   | -0.09 | 0.00 | 0.05  | 0.46  |
| 8399 | PLA2G10  | 0.00  | 0.00 | 0.00  | NaN   |
| 8402 | SLC25A11 | 0.00  | 0.00 | 0.00  | NaN   |
| 8403 | SOX14    | 0.00  | 0.00 | 0.00  | NaN   |
| 8404 | SPARCL1  | 0.00  | 0.00 | 0.00  | NaN   |
| 8405 | SPOP     | 0.00  | 0.25 | 0.00  | 0.71  |
| 8408 | ULK1     | 0.00  | 0.13 | 0.00  | -0.05 |
| 8409 | UXT      | 0.00  | 0.00 | 0.00  | NaN   |
| 8411 | EEA1     | 0.00  | 0.00 | 0.00  | NaN   |
| 8412 | BCAR3    | 0.09  | 0.00 | 0.00  | 0.38  |
| 8416 | ANXA9    | 0.00  | 0.00 | 0.05  | -0.14 |
| 8417 | STX7     | 0.00  | 0.00 | 0.00  | NaN   |
| 8418 | CMAH     | 0.00  | 0.00 | 0.05  | -0.06 |

|      |         |       |       |       |       |
|------|---------|-------|-------|-------|-------|
| 8419 | BFSP2   | 0.00  | 0.00  | 0.00  | NaN   |
| 8424 | BBOX1   | 0.00  | 0.00  | 0.00  | NaN   |
| 8425 | LTBP4   | 0.00  | 0.00  | 0.00  | NaN   |
| 8427 | ZNF282  | 0.00  | 0.00  | -0.05 | 0.21  |
| 8428 | STK24   | -0.09 | -0.13 | -0.05 | 0.21  |
| 8431 | NROB2   | -0.09 | 0.00  | 0.00  | 0.21  |
| 8433 | UTF1    | 0.00  | 0.00  | -0.10 | -0.09 |
| 8434 | RECK    | -0.09 | 0.00  | 0.10  | -0.08 |
| 8435 | SOAT2   | 0.00  | 0.00  | 0.00  | NaN   |
| 8436 | SDPR    | 0.00  | 0.00  | 0.00  | NaN   |
| 8437 | RASAL1  | 0.00  | 0.00  | 0.00  | NaN   |
| 8439 | NSMAF   | 0.00  | 0.00  | 0.00  | NaN   |
| 8440 | NCK2    | 0.00  | 0.00  | 0.00  | NaN   |
| 8443 | GNPAT   | 0.09  | 0.00  | 0.00  | 0.38  |
| 8444 | DYRK3   | 0.00  | 0.13  | 0.00  | 0.18  |
| 8445 | DYRK2   | 0.09  | 0.00  | -0.05 | 0.13  |
| 8446 | DUSP11  | 0.00  | 0.00  | 0.00  | NaN   |
| 8448 | DOC2A   | 0.00  | 0.00  | 0.00  | NaN   |
| 8449 | DDX16   | 0.00  | 0.00  | 0.00  | NaN   |
| 8451 | CUL4A   | -0.09 | -0.13 | -0.05 | 0.39  |
| 8452 | CUL3    | 0.00  | 0.00  | 0.00  | NaN   |
| 8453 | CUL2    | -0.09 | 0.00  | 0.05  | 0.63  |
| 8454 | CUL1    | 0.00  | 0.00  | -0.05 | 0.28  |
| 8455 | ATRN    | 0.00  | 0.00  | 0.00  | NaN   |
| 8456 | WHN     | 0.00  | 0.38  | 0.00  | -0.18 |
| 8459 | TPST2   | 0.00  | 0.13  | 0.00  | -0.03 |
| 8460 | TPST1   | -0.09 | 0.00  | 0.00  | 0.04  |
| 8462 | TIEG2   | 0.00  | 0.00  | -0.05 | 0.28  |
| 8464 | SUPT3H  | 0.00  | 0.00  | 0.00  | NaN   |
| 8467 | SMARCA5 | 0.00  | 0.00  | 0.00  | NaN   |
| 8468 | FKBP6   | -0.09 | 0.00  | 0.00  | 0.03  |
| 8470 | ARGBP2  | 0.00  | 0.00  | -0.05 | -0.04 |
| 8476 | PK428   | 0.09  | 0.00  | 0.00  | 0.02  |
| 8477 | GPR65   | 0.00  | 0.13  | 0.00  | 0.12  |
| 8479 | HIRIP3  | 0.00  | 0.00  | 0.00  | NaN   |
| 8480 | RAE1    | 0.18  | 0.50  | 0.00  | 0.67  |
| 8482 | SEMA7A  | 0.00  | 0.00  | 0.00  | NaN   |
| 8483 | CILP    | 0.00  | 0.00  | 0.00  | NaN   |
| 8484 | GALR3   | -0.09 | 0.00  | 0.05  | 0.02  |
| 8487 | SIP1    | 0.00  | 0.00  | 0.00  | NaN   |
| 8490 | RGS5    | 0.00  | 0.00  | 0.00  | NaN   |
| 8491 | MAP4K3  | 0.00  | 0.00  | 0.00  | NaN   |
| 8492 | PRSS12  | 0.00  | 0.00  | 0.00  | NaN   |
| 8493 | PPM1D   | 0.18  | 0.13  | 0.00  | 0.81  |
| 8495 | PPFIBP2 | 0.00  | 0.00  | -0.05 | 0.16  |
| 8496 | PPFIBP1 | 0.00  | 0.00  | 0.00  | NaN   |
| 8498 | RANBP3  | 0.00  | 0.00  | 0.00  | NaN   |

|      |          |       |       |       |       |
|------|----------|-------|-------|-------|-------|
| 8499 | PPFIA2   | 0.00  | 0.13  | 0.00  | 0.09  |
| 8500 | PPFIA1   | 0.55  | 0.25  | 0.00  | 0.76  |
| 8501 | POV1     | 0.00  | 0.00  | 0.00  | NaN   |
| 8502 | PKP4     | 0.00  | 0.00  | -0.05 | 0.10  |
| 8503 | PIK3R3   | 0.00  | 0.00  | 0.00  | NaN   |
| 8504 | PEX3     | 0.00  | 0.00  | 0.00  | NaN   |
| 8505 | PARG     | 0.00  | 0.00  | 0.00  | NaN   |
| 8506 | CNTNAP1  | 0.00  | -0.13 | 0.00  | -0.01 |
| 8507 | ENC1     | 0.33  | 0.00  | 0.33  | 0.11  |
| 8508 | NIPSNAP1 | -0.09 | 0.00  | 0.00  | 0.07  |
| 8509 | NDST2    | 0.09  | 0.00  | 0.00  | 0.38  |
| 8511 | MMP23A   | 0.00  | 0.00  | -0.05 | 0.01  |
| 8513 | LIPF     | 0.09  | 0.00  | 0.00  | -0.04 |
| 8514 | KCNAB2   | 0.00  | 0.00  | 0.00  | NaN   |
| 8515 | ITGA10   | 0.00  | 0.00  | 0.05  | -0.06 |
| 8516 | ITGA8    | 0.00  | 0.00  | 0.05  | -0.22 |
| 8518 | IKBKAP   | 0.00  | 0.00  | 0.00  | NaN   |
| 8519 | IFITM1   | -0.27 | -0.13 | -0.15 | 0.37  |
| 8520 | HAT1     | 0.00  | 0.00  | 0.00  | NaN   |
| 8521 | GCMA     | 0.00  | 0.00  | 0.00  | NaN   |
| 8522 | GAS7     | 0.00  | 0.00  | 0.00  | NaN   |
| 8525 | DGKZ     | 0.00  | 0.00  | 0.00  | NaN   |
| 8526 | DGKE     | 0.09  | -0.13 | 0.00  | 0.13  |
| 8527 | DGKD     | 0.00  | 0.00  | 0.00  | NaN   |
| 8528 | DDO      | 0.00  | 0.00  | 0.05  | -0.06 |
| 8529 | CYP4F2   | 0.00  | 0.00  | 0.00  | NaN   |
| 8530 | CST7     | 0.00  | 0.00  | 0.00  | NaN   |
| 8531 | CSDA     | -0.09 | 0.00  | 0.00  | 0.17  |
| 8532 | CPZ      | 0.00  | -0.13 | -0.10 | 0.00  |
| 8533 | COPS3    | 0.00  | 0.00  | 0.00  | NaN   |
| 8534 | CHST1    | 0.00  | 0.00  | 0.00  | NaN   |
| 8535 | CBX4     | 0.00  | 0.25  | 0.00  | 0.55  |
| 8536 | CAMK1    | 0.00  | 0.00  | 0.00  | NaN   |
| 8537 | BCAS1    | 0.18  | 0.50  | 0.00  | 0.56  |
| 8538 | BARX2    | -0.09 | 0.00  | -0.10 | 0.07  |
| 8539 | API5     | 0.00  | 0.00  | 0.00  | NaN   |
| 8540 | AGPS     | 0.00  | 0.00  | 0.00  | NaN   |
| 8541 | PPFIA3   | 0.09  | 0.00  | 0.00  | 0.23  |
| 8542 | APOL1    | 0.00  | 0.00  | 0.00  | NaN   |
| 8545 | CGGBP1   | -0.09 | 0.00  | 0.05  | 0.57  |
| 8546 | AP3B1    | 0.00  | 0.00  | 0.00  | NaN   |
| 8547 | FCN3     | -0.09 | 0.00  | 0.00  | -0.04 |
| 8548 | BLZF1    | 0.00  | 0.00  | -0.05 | 0.19  |
| 8549 | GPR49    | 0.09  | 0.00  | 0.00  | -0.01 |
| 8550 | MAPKAPK5 | 0.00  | 0.00  | 0.00  | NaN   |
| 8553 | BHLHB2   | 0.00  | 0.00  | 0.33  | 0.13  |
| 8554 | PIAS1    | 0.00  | 0.00  | 0.00  | NaN   |

|      |           |       |       |       |       |
|------|-----------|-------|-------|-------|-------|
| 8555 | CDC14B    | 0.09  | 0.00  | -0.05 | 0.10  |
| 8556 | CDC14A    | 0.00  | 0.00  | 0.00  | NaN   |
| 8557 | TCAP      | 0.00  | 1.00  | 0.00  | 0.46  |
| 8558 | CDK10     | -0.09 | -0.13 | -0.05 | 0.54  |
| 8559 | PRP18     | 0.00  | 0.00  | 0.00  | NaN   |
| 8560 | DEGS      | 0.09  | 0.00  | 0.00  | 0.25  |
| 8562 | DENR      | 0.00  | -0.13 | 0.00  | 0.29  |
| 8563 | C22orf19  | -0.09 | 0.00  | 0.00  | 0.15  |
| 8564 | KMO       | 0.00  | 0.00  | 0.00  | NaN   |
| 8565 | YARS      | 0.00  | 0.00  | 0.00  | NaN   |
| 8566 | PDXK      | 0.00  | 0.00  | 0.00  | NaN   |
| 8568 | D21S2056E | 0.00  | 0.00  | 0.00  | NaN   |
| 8569 | MKNK1     | 0.00  | 0.00  | 0.00  | NaN   |
| 8570 | KHSRP     | 0.00  | 0.00  | 0.00  | NaN   |
| 8572 | RIL       | 0.00  | -0.13 | 0.00  | 0.12  |
| 8574 | AKR7A2    | -0.09 | 0.00  | 0.00  | 0.34  |
| 8575 | PRKRA     | 0.00  | 0.00  | 0.50  | 0.53  |
| 8576 | STK16     | 0.00  | 0.00  | 0.00  | NaN   |
| 8577 | TMEFF1    | 0.00  | 0.00  | 0.00  | NaN   |
| 8578 | SREC      | 0.00  | -0.13 | 0.00  | -0.03 |
| 8581 | E48       | 0.18  | 0.13  | 0.05  | 0.28  |
| 8590 | OR6A1     | 0.00  | -0.13 | 0.00  | 0.00  |
| 8600 | TNFSF11   | 0.00  | 0.00  | -0.05 | 0.10  |
| 8601 | RGS20     | 0.00  | 0.00  | 0.00  | NaN   |
| 8602 | RES4-25   | 0.00  | -0.13 | -0.15 | 0.22  |
| 8603 | RES4-22   | 0.00  | -0.13 | -0.15 | 0.43  |
| 8604 | SLC25A12  | 0.00  | 0.00  | 0.00  | NaN   |
| 8605 | PLA2G4C   | 0.09  | 0.00  | 0.00  | -0.19 |
| 8607 | RUVBL1    | 0.00  | 0.00  | 0.00  | NaN   |
| 8608 | RODH-4    | 0.00  | 0.00  | 0.00  | NaN   |
| 8609 | KLF7      | 0.00  | 0.00  | 0.00  | NaN   |
| 8611 | PPAP2A    | 0.00  | 0.00  | -0.05 | 0.22  |
| 8612 | PPAP2C    | 0.00  | 0.00  | -0.05 | -0.09 |
| 8613 | PPAP2B    | 0.00  | 0.00  | -0.05 | 0.24  |
| 8614 | STC2      | 0.00  | 0.00  | 0.00  | NaN   |
| 8615 | P115      | 0.00  | 0.00  | 0.00  | NaN   |
| 8618 | CADPS     | 0.09  | 0.00  | -0.05 | 0.24  |
| 8620 | NPFF      | 0.00  | 0.00  | 0.00  | NaN   |
| 8621 | CDC2L5    | 0.00  | 0.00  | 0.00  | NaN   |
| 8624 | DSCR2     | 0.00  | 0.00  | 0.00  | NaN   |
| 8625 | RFXANK    | 0.00  | 0.00  | 0.00  | NaN   |
| 8626 | TP63      | 0.00  | 0.00  | 0.05  | 0.26  |
| 8629 | JRK       | 0.18  | 0.13  | 0.05  | 0.31  |
| 8630 | RODH      | 0.00  | 0.00  | 0.00  | NaN   |
| 8631 | SCAP1     | 0.00  | 0.00  | 0.00  | -0.17 |
| 8633 | UNC5C     | 0.00  | 0.00  | 0.00  | NaN   |
| 8634 | RTCD1     | 0.00  | 0.00  | 0.00  | NaN   |

|      |           |       |       |       |       |
|------|-----------|-------|-------|-------|-------|
| 8635 | RNASE6PL  | 0.00  | 0.00  | 0.00  | NaN   |
| 8636 | SSNA1     | 0.00  | 0.13  | 0.00  | 0.02  |
| 8638 | OASL      | 0.00  | -0.13 | 0.00  | 0.04  |
| 8639 | AOC3      | 0.00  | -0.13 | 0.00  | -0.23 |
| 8642 | PCDH16    | 0.00  | -0.13 | 0.00  | -0.05 |
| 8643 | PTCH2     | 0.00  | 0.00  | 0.00  | NaN   |
| 8644 | AKR1C3    | 0.00  | 0.00  | 0.05  | 0.31  |
| 8645 | KCNK5     | 0.00  | 0.00  | 0.00  | NaN   |
| 8646 | CHRD      | 0.09  | 0.00  | 0.00  | 0.07  |
| 8647 | ABCB11    | 0.00  | 0.00  | 0.00  | NaN   |
| 8648 | NCOA1     | 0.09  | 0.00  | 0.00  | 0.56  |
| 8649 | MAP2K1IP1 | 0.00  | 0.00  | 0.00  | NaN   |
| 8650 | NUMB      | 0.00  | 0.00  | 0.00  | NaN   |
| 8651 | SSI-1     | 0.00  | 0.00  | 0.00  | NaN   |
| 8654 | PDE5A     | 0.00  | 0.00  | 0.00  | NaN   |
| 8655 | PIN       | 0.00  | 0.00  | 0.00  | -0.04 |
| 8658 | TNKS      | -0.09 | -0.25 | -0.10 | 0.14  |
| 8659 | ALDH4A1   | -0.09 | 0.00  | 0.00  | 0.15  |
| 8660 | IRS2      | -0.09 | -0.13 | 0.00  | 0.21  |
| 8662 | EIF3S9    | 0.00  | 0.13  | 0.05  | 0.57  |
| 8663 | EIF3S8    | 0.00  | 0.00  | 0.00  | NaN   |
| 8664 | EIF3S7    | -0.09 | 0.00  | 0.00  | 0.42  |
| 8665 | EIF3S5    | 0.00  | 0.00  | -0.05 | 0.18  |
| 8666 | EIF3S4    | 0.00  | 0.00  | 0.05  | 0.45  |
| 8667 | EIF3S3    | 0.00  | 0.38  | 0.10  | 0.78  |
| 8668 | EIF3S2    | 0.00  | 0.00  | 0.00  | NaN   |
| 8669 | EIF3S1    | 0.00  | 0.00  | 0.00  | NaN   |
| 8671 | SLC4A4    | 0.00  | 0.00  | 0.00  | NaN   |
| 8672 | EIF4G3    | -0.09 | 0.00  | -0.05 | 0.44  |
| 8673 | VAMP8     | 0.00  | 0.00  | -0.05 | 0.08  |
| 8674 | VAMP4     | 0.00  | 0.00  | 0.00  | NaN   |
| 8676 | STX11     | 0.00  | 0.00  | 0.00  | NaN   |
| 8677 | STX10     | 0.00  | 0.00  | 0.00  | NaN   |
| 8678 | BECN1     | 0.00  | -0.13 | 0.00  | 0.41  |
| 8681 | PLA2G4B   | 0.00  | 0.00  | 0.00  | NaN   |
| 8682 | PEA15     | 0.00  | 0.00  | 0.00  | NaN   |
| 8683 | SFRS9     | 0.00  | -0.13 | 0.00  | 0.33  |
| 8685 | MARCO     | 0.00  | 0.00  | 0.00  | NaN   |
| 8687 | KRTHA8    | 0.00  | 0.13  | 0.00  | 0.10  |
| 8688 | KRTHA7    | 0.00  | 0.13  | 0.00  | -0.02 |
| 8689 | KRTHA6    | 0.00  | 0.13  | 0.00  | 0.02  |
| 8690 | JRKL      | 0.00  | 0.00  | 0.05  | 0.05  |
| 8692 | HYAL2     | -0.09 | 0.00  | -0.05 | 0.11  |
| 8693 | GALNT4    | 0.09  | 0.00  | 0.00  | 0.36  |
| 8694 | DGAT1     | 0.18  | 0.00  | 0.10  | 0.16  |
| 8697 | CDC23     | 0.00  | 0.00  | 0.00  | NaN   |
| 8698 | EDG6      | 0.00  | 0.00  | 0.00  | NaN   |

|      |          |       |       |       |       |
|------|----------|-------|-------|-------|-------|
| 8702 | B4GALT4  | 0.00  | 0.00  | 0.00  | NaN   |
| 8703 | B4GALT3  | 0.00  | 0.00  | 0.00  | NaN   |
| 8704 | B4GALT2  | 0.00  | 0.00  | 0.00  | NaN   |
| 8705 | B3GALT4  | 0.09  | 0.00  | 0.00  | -0.02 |
| 8706 | B3GALT3  | 0.00  | 0.00  | 0.00  | NaN   |
| 8707 | B3GALT2  | 0.09  | 0.00  | 0.00  | 0.18  |
| 8708 | B3GALT1  | 0.00  | 0.00  | 0.00  | NaN   |
| 8710 | SERPINB7 | -0.09 | 0.00  | -0.15 | -0.07 |
| 8711 | TNK1     | 0.00  | 0.00  | 0.00  | NaN   |
| 8714 | ABCC3    | 0.00  | 0.25  | 0.00  | 0.57  |
| 8715 | NOL4     | 0.00  | 0.00  | -0.10 | 0.02  |
| 8717 | TRADD    | -0.09 | 0.00  | 0.00  | 0.21  |
| 8718 | TNFRSF12 | 0.00  | 0.00  | 0.00  | NaN   |
| 8720 | MBTPS1   | -0.09 | -0.13 | -0.05 | 0.32  |
| 8721 | EDF1     | 0.00  | 0.00  | 0.00  | NaN   |
| 8722 | CTSF     | 0.00  | 0.00  | 0.05  | -0.04 |
| 8723 | SNX4     | 0.00  | 0.00  | 0.00  | NaN   |
| 8724 | SNX3     | 0.00  | 0.00  | 0.10  | 0.65  |
| 8725 | RMP      | 0.00  | 0.13  | 0.15  | 0.69  |
| 8726 | EED      | 0.00  | 0.00  | 0.00  | NaN   |
| 8727 | CTNNA1   | 0.00  | 0.00  | 0.00  | NaN   |
| 8728 | ADAM19   | 0.00  | 0.00  | 0.00  | NaN   |
| 8729 | GBF1     | 0.00  | -0.13 | -0.05 | 0.12  |
| 8731 | RNMT     | 0.00  | 0.00  | 0.00  | NaN   |
| 8732 | RNGTT    | 0.00  | 0.00  | 0.00  | NaN   |
| 8733 | GPAA1    | 0.18  | 0.00  | 0.10  | 0.36  |
| 8735 | MYH13    | 0.00  | 0.00  | 0.00  | NaN   |
| 8736 | MYOM1    | 0.00  | 0.00  | -0.05 | 0.05  |
| 8737 | RIPK1    | 0.00  | 0.00  | -0.10 | 0.16  |
| 8738 | CRADD    | 0.00  | 0.13  | 0.00  | 0.21  |
| 8739 | HRK      | 0.00  | -0.13 | 0.00  | 0.12  |
| 8740 | TNFSF14  | 0.00  | 0.00  | 0.00  | NaN   |
| 8741 | TNFSF13  | 0.00  | 0.00  | 0.00  | NaN   |
| 8743 | TNFSF10  | 0.09  | 0.00  | 0.00  | -0.07 |
| 8744 | TNFSF9   | 0.00  | 0.00  | 0.00  | NaN   |
| 8745 | ADAM23   | 0.00  | 0.00  | 0.00  | NaN   |
| 8747 | ADAM21   | 0.00  | 0.00  | 0.00  | NaN   |
| 8748 | ADAM20   | 0.00  | 0.00  | 0.00  | NaN   |
| 8754 | ADAM9    | 0.27  | -0.13 | 0.00  | 0.38  |
| 8756 | ADAM7    | 0.00  | -0.13 | -0.05 | -0.06 |
| 8760 | CDS2     | 0.00  | 0.00  | 0.00  | NaN   |
| 8761 | PABPC4   | 0.00  | 0.00  | 0.00  | NaN   |
| 8763 | CD164    | 0.00  | 0.00  | 0.05  | 0.22  |
| 8764 | TNFRSF14 | 0.00  | 0.00  | 0.00  | NaN   |
| 8766 | RAB11A   | 0.09  | 0.00  | 0.00  | 0.27  |
| 8767 | RIPK2    | 0.18  | 0.25  | 0.00  | 0.25  |
| 8771 | TNFRSF6B | 0.09  | 0.00  | 0.00  | 0.11  |



|      |           |       |       |       |       |
|------|-----------|-------|-------|-------|-------|
| 8772 | FADD      | 0.55  | 0.25  | 0.00  | 0.77  |
| 8773 | SNAP23    | 0.00  | 0.00  | 0.00  | NaN   |
| 8774 | NAPG      | 0.00  | 0.00  | 0.00  | NaN   |
| 8775 | NAPA      | 0.09  | 0.00  | 0.00  | 0.42  |
| 8777 | MPDZ      | 0.00  | 0.00  | 0.05  | 0.63  |
| 8778 | SIGLEC5   | 0.00  | 0.00  | -0.05 | 0.16  |
| 8780 | SUDD      | 0.00  | 0.00  | -0.15 | 0.29  |
| 8785 | MATN4     | 0.00  | 0.00  | 0.00  | NaN   |
| 8786 | RGS11     | 0.00  | 0.00  | -0.05 | -0.06 |
| 8787 | RGS9      | 0.18  | 0.13  | 0.05  | -0.24 |
| 8788 | DLK1      | 0.00  | 0.00  | 0.00  | NaN   |
| 8790 | FPGT      | 0.00  | 0.00  | 0.00  | NaN   |
| 8792 | TNFRSF11A | -0.09 | 0.00  | -0.15 | 0.18  |
| 8793 | TNFRSF10D | -0.09 | -0.25 | -0.15 | 0.23  |
| 8794 | TNFRSF10C | -0.09 | -0.25 | -0.15 | 0.25  |
| 8795 | TNFRSF10B | -0.09 | -0.25 | -0.15 | 0.22  |
| 8796 | SCEL      | -0.09 | 0.13  | -0.10 | 0.15  |
| 8798 | DYRK4     | -0.09 | 0.00  | 0.05  | 0.23  |
| 8799 | PEX11B    | 0.00  | 0.00  | 0.05  | 0.04  |
| 8800 | PEX11A    | 0.00  | 0.00  | 0.00  | NaN   |
| 8801 | SUCLG2    | 0.00  | 0.00  | -0.05 | 0.58  |
| 8802 | SUCLG1    | 0.00  | 0.00  | 0.00  | NaN   |
| 8803 | SUCLA2    | 0.00  | 0.00  | 0.00  | NaN   |
| 8804 | CREG      | 0.00  | 0.00  | 0.00  | NaN   |
| 8805 | TIF1      | 0.00  | 0.00  | 0.00  | NaN   |
| 8807 | IL18RAP   | 0.00  | 0.00  | 0.00  | NaN   |
| 8808 | IL1RL2    | 0.00  | 0.00  | 0.00  | NaN   |
| 8809 | IL18R1    | 0.00  | 0.00  | 0.00  | NaN   |
| 8811 | GALR2     | 0.00  | 0.13  | 0.00  | -0.07 |
| 8813 | DPM1      | 0.09  | 0.13  | 0.05  | 0.38  |
| 8814 | CDKL1     | 0.00  | 0.00  | 0.00  | NaN   |
| 8815 | BCRP1     | -0.09 | 0.00  | 0.05  | 0.53  |
| 8817 | FGF18     | 0.00  | 0.00  | 0.00  | NaN   |
| 8818 | DPM2      | -0.09 | 0.00  | -0.05 | 0.24  |
| 8819 | SAP30     | 0.00  | 0.00  | -0.05 | 0.30  |
| 8820 | HESX1     | 0.00  | 0.00  | -0.10 | 0.37  |
| 8821 | INPP4B    | 0.00  | 0.00  | 0.00  | NaN   |
| 8822 | FGF17     | -0.09 | -0.25 | -0.10 | 0.11  |
| 8825 | VELI1     | 0.00  | 0.13  | 0.00  | 0.38  |
| 8826 | IQGAP1    | 0.00  | 0.00  | 0.00  | NaN   |
| 8832 | CD84      | 0.00  | 0.00  | 0.00  | NaN   |
| 8833 | GMPS      | 0.00  | 0.00  | 0.00  | NaN   |
| 8834 | PMI       | 0.00  | -0.13 | 0.00  | 0.16  |
| 8835 | STAT2     | 0.00  | 0.13  | 0.00  | 0.29  |
| 8836 | GGH       | 0.00  | 0.00  | 0.00  | NaN   |
| 8837 | CFLAR     | 0.00  | 0.00  | 0.00  | NaN   |
| 8838 | WISP3     | 0.00  | 0.00  | 0.10  | 0.02  |

|      |         |       |       |       |       |
|------|---------|-------|-------|-------|-------|
| 8839 | WISP2   | 0.09  | 0.13  | 0.00  | 0.07  |
| 8840 | WISP1   | 0.00  | 0.00  | 0.05  | -0.13 |
| 8842 | PROML1  | 0.00  | 0.00  | -0.10 | 0.12  |
| 8844 | KSR     | 0.00  | 0.13  | 0.00  | 0.29  |
| 8846 | ABH     | 0.00  | 0.00  | 0.00  | NaN   |
| 8850 | PCAF    | 0.00  | 0.00  | 0.00  | NaN   |
| 8851 | CDK5R1  | 0.00  | 0.00  | 0.00  | NaN   |
| 8853 | DDEF2   | 0.09  | 0.00  | -0.05 | 0.29  |
| 8854 | ALDH1A2 | 0.00  | 0.00  | 0.00  | NaN   |
| 8856 | NR1I2   | 0.00  | 0.00  | 0.00  | NaN   |
| 8857 | FCGBP   | 0.00  | 0.00  | 0.00  | NaN   |
| 8858 | PROZ    | -0.09 | -0.13 | -0.05 | -0.08 |
| 8859 | STK19   | 0.00  | 0.00  | 0.00  | NaN   |
| 8861 | LDB1    | 0.00  | -0.13 | -0.05 | 0.10  |
| 8863 | PER3    | 0.00  | 0.00  | 0.00  | NaN   |
| 8864 | PER2    | 0.00  | 0.00  | -0.05 | 0.17  |
| 8867 | SYNJ1   | 0.00  | 0.00  | 0.00  | NaN   |
| 8869 | SIAT9   | 0.00  | 0.00  | -0.05 | 0.12  |
| 8870 | IER3    | 0.00  | 0.00  | 0.00  | NaN   |
| 8871 | SYNJ2   | 0.00  | 0.00  | 0.00  | NaN   |
| 8872 | D123    | 0.00  | 0.00  | 0.00  | NaN   |
| 8874 | ARHGEF7 | -0.09 | -0.13 | 0.00  | 0.34  |
| 8875 | VNN2    | 0.00  | 0.00  | 0.00  | NaN   |
| 8876 | VNN1    | 0.00  | 0.00  | 0.00  | NaN   |
| 8877 | SPHK1   | 0.00  | 0.13  | 0.00  | 0.24  |
| 8878 | SQSTM1  | 0.00  | 0.00  | 0.00  | NaN   |
| 8879 | SGPL1   | 0.09  | 0.00  | 0.00  | 0.42  |
| 8880 | FUBP1   | 0.00  | 0.00  | 0.00  | NaN   |
| 8881 | CDC16   | -0.09 | -0.13 | -0.05 | 0.35  |
| 8882 | ZNF259  | -0.09 | 0.00  | 0.00  | 0.30  |
| 8883 | APPBP1  | -0.09 | -0.13 | 0.00  | 0.46  |
| 8884 | SLC5A6  | 0.09  | 0.00  | 0.05  | 0.33  |
| 8886 | DDX18   | 0.00  | 0.00  | 0.00  | NaN   |
| 8887 | TAX1BP1 | 0.00  | 0.13  | 0.00  | -0.18 |
| 8888 | MCM3AP  | 0.00  | 0.00  | 0.00  | NaN   |
| 8891 | EIF2B3  | 0.00  | 0.00  | 0.00  | NaN   |
| 8892 | EIF2B2  | 0.00  | 0.00  | 0.00  | NaN   |
| 8893 | EIF2B5  | 0.09  | 0.13  | 0.00  | 0.38  |
| 8894 | EIF2S2  | 0.00  | -0.13 | 0.00  | 0.45  |
| 8895 | CPNE3   | 0.18  | 0.25  | 0.00  | 0.47  |
| 8896 | G10     | 0.18  | 0.00  | 0.00  | 0.61  |
| 8897 | MTMR3   | 0.00  | 0.00  | 0.00  | NaN   |
| 8898 | MTMR2   | 0.00  | 0.00  | 0.00  | NaN   |
| 8899 | PRP4    | 0.00  | 0.00  | 0.00  | NaN   |
| 8900 | CCNA1   | 0.00  | 0.00  | 0.00  | NaN   |
| 8904 | CPNE1   | 0.00  | 0.13  | 0.00  | -0.02 |
| 8906 | AP1G2   | 0.00  | 0.00  | 0.00  | NaN   |

|      |           |       |       |       |       |
|------|-----------|-------|-------|-------|-------|
| 8910 | SGCE      | 0.18  | 0.00  | 0.00  | -0.21 |
| 8911 | CACNA1I   | -0.09 | 0.00  | 0.05  | -0.10 |
| 8912 | CACNA1H   | 0.00  | 0.13  | -0.05 | 0.24  |
| 8913 | CACNA1G   | 0.00  | 0.25  | 0.00  | 0.12  |
| 8914 | TIMELESS  | 0.00  | 0.00  | 0.00  | NaN   |
| 8915 | BCL10     | 0.00  | 0.00  | 0.10  | 0.43  |
| 8916 | HERC3     | 0.00  | 0.00  | 0.00  | NaN   |
| 8924 | HERC2     | 0.00  | -0.13 | 0.00  | 0.20  |
| 8925 | HERC1     | 0.00  | 0.00  | 0.00  | NaN   |
| 8927 | BSN       | -0.09 | 0.00  | -0.05 | -0.07 |
| 8928 | FOXH1     | 0.18  | 0.00  | 0.10  | -0.03 |
| 8929 | PMX2B     | 0.00  | 0.00  | 0.00  | NaN   |
| 8930 | MBD4      | 0.00  | 0.00  | 0.00  | NaN   |
| 8932 | MBD2      | -0.09 | 0.00  | -0.20 | 0.48  |
| 8933 | CXX1      | 0.00  | 0.00  | 0.00  | NaN   |
| 8934 | RAB7L1    | 0.00  | 0.13  | 0.00  | 0.49  |
| 8935 | SCAP2     | 0.00  | 0.13  | 0.00  | -0.18 |
| 8936 | WASF1     | 0.00  | 0.00  | 0.05  | 0.12  |
| 8938 | BAIAP3    | 0.00  | 0.00  | 0.00  | NaN   |
| 8939 | FUBP3     | 0.00  | 0.00  | 0.00  | NaN   |
| 8940 | TOP3B     | 0.00  | 0.00  | 0.00  | NaN   |
| 8941 | CDK5R2    | 0.00  | 0.00  | 0.00  | NaN   |
| 8942 | KYNU      | 0.00  | 0.00  | 0.00  | NaN   |
| 8943 | AP3D1     | 0.00  | 0.00  | 0.00  | NaN   |
| 8945 | BTRC      | 0.00  | -0.13 | -0.05 | 0.06  |
| 8970 | H2BFR     | 0.00  | 0.00  | 0.00  | NaN   |
| 8971 | H1FX      | 0.00  | 0.00  | 0.00  | NaN   |
| 8972 | MGAM      | 0.00  | 0.00  | 0.00  | 0.03  |
| 8973 | CHRNA6    | 0.09  | 0.00  | -0.05 | 0.10  |
| 8974 | P4HA2     | 0.00  | -0.13 | 0.00  | 0.28  |
| 8975 | USP13     | 0.09  | 0.00  | 0.00  | 0.28  |
| 8976 | WASL      | 0.00  | 0.13  | 0.00  | 0.40  |
| 8985 | PLOD3     | 0.18  | 0.00  | 0.00  | 0.19  |
| 8986 | RPS6KA4   | 0.00  | 0.00  | 0.00  | NaN   |
| 8987 | GENX-3414 | 0.00  | 0.00  | 0.00  | NaN   |
| 8988 | HSPB3     | 0.00  | 0.00  | -0.05 | 0.01  |
| 8989 | ANKTM1    | 0.00  | 0.25  | 0.00  | -0.07 |
| 8991 | SELENBP1  | 0.00  | 0.00  | 0.05  | 0.03  |
| 8992 | ATP6V0E   | 0.00  | 0.00  | 0.00  | NaN   |
| 8993 | PGLYRP    | 0.09  | 0.00  | 0.00  | -0.01 |
| 8994 | LIMD1     | -0.09 | 0.00  | -0.05 | 0.18  |
| 8995 | TNFSF18   | 0.00  | 0.00  | 0.00  | NaN   |
| 8996 | NOL3      | 0.50  | 0.50  | 0.50  | 0.42  |
| 8997 | HAPIP     | 0.00  | 0.00  | 0.00  | NaN   |
| 8999 | CDKL2     | 0.00  | 0.00  | 0.00  | NaN   |
| 9002 | F2RL3     | 0.00  | 0.00  | 0.00  | NaN   |
| 9013 | TAF1C     | -0.09 | -0.13 | -0.05 | 0.54  |

|      |            |       |       |       |       |
|------|------------|-------|-------|-------|-------|
| 9014 | TAF1B      | 0.00  | 0.00  | -0.05 | 0.23  |
| 9015 | TAF1A      | 0.09  | 0.00  | 0.00  | -0.14 |
| 9019 | MPZL1      | 0.00  | 0.00  | 0.00  | NaN   |
| 9020 | MAP3K14    | 0.00  | -0.13 | 0.00  | 0.05  |
| 9021 | SSI-3      | 0.00  | 0.13  | 0.00  | 0.01  |
| 9022 | CLIC3      | 0.00  | 0.00  | 0.00  | NaN   |
| 9023 | CH25H      | 0.09  | 0.00  | 0.00  | -0.03 |
| 9024 | STK29      | -0.27 | -0.13 | -0.05 | -0.02 |
| 9025 | RNF8       | 0.00  | 0.00  | 0.00  | NaN   |
| 9026 | HIP12      | 0.00  | -0.13 | 0.00  | 0.06  |
| 9027 | NAT8       | 0.00  | 0.00  | 0.00  | NaN   |
| 9028 | RHBDL      | 0.00  | 0.00  | -0.05 | 0.12  |
| 9031 | BAZ1B      | 0.09  | 0.00  | 0.00  | -0.10 |
| 9032 | TM4SF5     | 0.00  | 0.00  | 0.00  | NaN   |
| 9033 | PKD2L1     | 0.00  | -0.13 | -0.05 | -0.13 |
| 9034 | CCRL2      | -0.09 | 0.00  | -0.05 | 0.02  |
| 9037 | SEMA5A     | 0.00  | 0.00  | 0.10  | -0.09 |
| 9038 | PNR        | 0.00  | 0.00  | 0.00  | NaN   |
| 9039 | UBE1C      | 0.00  | 0.00  | -0.05 | 0.17  |
| 9040 | UBE2M      | 0.00  | 0.13  | 0.10  | 0.38  |
| 9043 | SPAG9      | 0.00  | 0.25  | 0.00  | 0.20  |
| 9044 | BTAF1      | 0.00  | 0.00  | 0.00  | NaN   |
| 9045 | RPL14      | 0.00  | 0.00  | -0.05 | 0.19  |
| 9046 | DOK2       | -0.09 | -0.25 | -0.10 | 0.03  |
| 9047 | SH2D2A     | 0.00  | 0.00  | 0.00  | 0.23  |
| 9048 | ARTN       | 0.00  | 0.00  | 0.00  | NaN   |
| 9049 | AIP        | 0.36  | 0.00  | 0.05  | 0.62  |
| 9050 | PSTPIP2    | -0.09 | -0.13 | -0.20 | 0.20  |
| 9051 | PSTPIP1    | 0.00  | 0.00  | 0.00  | NaN   |
| 9052 | RAI3       | -0.09 | 0.00  | 0.00  | 0.12  |
| 9053 | MAP7       | 0.00  | 0.00  | 0.00  | NaN   |
| 9054 | NFS1       | 0.00  | 0.00  | 0.00  | NaN   |
| 9055 | PRC1       | 0.00  | 0.00  | 0.00  | NaN   |
| 9056 | SLC7A7     | 0.00  | 0.00  | 0.00  | NaN   |
| 9057 | SLC7A6     | -0.09 | -0.13 | 0.00  | 0.27  |
| 9058 | SLC13A2    | 0.00  | 0.38  | 0.00  | 0.20  |
| 9060 | PAPSS2     | 0.09  | 0.00  | -0.15 | 0.26  |
| 9061 | PAPSS1     | 0.00  | 0.00  | 0.00  | NaN   |
| 9063 | PIASX-BETA | -0.09 | -0.13 | -0.15 | 0.45  |
| 9064 | MAP3K6     | -0.09 | 0.00  | 0.00  | 0.09  |
| 9070 | ASH2L      | 0.64  | -0.13 | -0.05 | 0.73  |
| 9071 | CLDN10     | -0.09 | 0.13  | -0.05 | 0.01  |
| 9074 | CLDN6      | 0.00  | 0.00  | 0.00  | NaN   |
| 9076 | CLDN1      | 0.00  | 0.00  | 0.05  | 0.56  |
| 9079 | LDB2       | 0.00  | 0.00  | -0.10 | -0.14 |
| 9080 | CLDN9      | 0.00  | 0.00  | 0.00  | NaN   |
| 9088 | PKMYT1     | 0.00  | 0.00  | 0.00  | NaN   |

|      |          |       |       |       |       |
|------|----------|-------|-------|-------|-------|
| 9091 | PIGQ     | 0.00  | 0.00  | -0.05 | 0.08  |
| 9092 | SART1    | -0.09 | 0.00  | 0.05  | 0.48  |
| 9093 | DNAJA3   | 0.00  | 0.00  | 0.00  | NaN   |
| 9094 | UNC119   | 0.00  | 0.38  | 0.00  | 0.63  |
| 9095 | TBX19    | 0.00  | 0.00  | 0.00  | NaN   |
| 9097 | USP14    | 0.00  | 0.00  | 0.00  | NaN   |
| 9098 | USP6     | 0.00  | 0.00  | 0.00  | NaN   |
| 9099 | USP2     | -0.09 | 0.00  | -0.10 | 0.16  |
| 9100 | USP10    | -0.09 | 0.00  | -0.05 | 0.41  |
| 9101 | USP8     | 0.18  | 0.00  | 0.00  | 0.28  |
| 9107 | MTMR6    | 0.00  | -0.13 | -0.15 | 0.53  |
| 9108 | MTMR7    | 0.00  | -0.13 | -0.05 | 0.01  |
| 9110 | MTMR4    | 0.09  | 0.00  | 0.00  | 0.59  |
| 9112 | MTA1     | 0.00  | 0.00  | 0.00  | NaN   |
| 9113 | LATS1    | 0.00  | 0.00  | 0.00  | NaN   |
| 9114 | ATP6V0D1 | -0.09 | 0.00  | 0.05  | 0.68  |
| 9119 | K6HF     | 0.00  | 0.00  | 0.00  | NaN   |
| 9120 | SLC16A6  | 0.18  | 0.13  | 0.00  | 0.19  |
| 9121 | SLC16A5  | 0.00  | 0.13  | 0.00  | 0.67  |
| 9122 | SLC16A4  | 0.09  | 0.00  | 0.00  | -0.11 |
| 9123 | SLC16A3  | 0.00  | 0.00  | 0.00  | NaN   |
| 9124 | PDLIM1   | 0.00  | 0.00  | 0.00  | NaN   |
| 9125 | RQCD1    | 0.00  | 0.00  | 0.00  | NaN   |
| 9126 | CSPG6    | 0.00  | 0.00  | -0.05 | 0.22  |
| 9127 | P2RXL1   | 0.00  | 0.13  | 0.00  | 0.24  |
| 9128 | PRPF4    | 0.00  | 0.00  | 0.00  | NaN   |
| 9129 | HPRP3P   | 0.00  | 0.13  | 0.05  | 0.29  |
| 9132 | KCNQ4    | 0.00  | 0.00  | 0.00  | NaN   |
| 9133 | CCNB2    | 0.09  | 0.00  | 0.05  | 0.25  |
| 9134 | CCNE2    | 0.00  | -0.13 | 0.00  | 0.41  |
| 9135 | RAB5EP   | 0.00  | 0.00  | 0.00  | NaN   |
| 9136 | U3-55K   | -0.09 | 0.00  | -0.10 | 0.30  |
| 9138 | ARHGEF1  | 0.00  | 0.00  | -0.05 | 0.09  |
| 9139 | CBFA2T2  | -0.09 | 0.00  | 0.00  | 0.38  |
| 9140 | APG12L   | 0.00  | 0.13  | 0.00  | 0.53  |
| 9141 | PDCD5    | 0.00  | 0.00  | 0.05  | 0.04  |
| 9143 | SYNGR3   | 0.00  | 0.00  | 0.00  | NaN   |
| 9144 | SYNGR2   | 0.00  | 0.13  | 0.00  | 0.30  |
| 9145 | SYNGR1   | -0.09 | 0.00  | 0.05  | 0.22  |
| 9146 | HGS      | 0.00  | 0.00  | 0.00  | NaN   |
| 9147 | SDCCAG1  | 0.00  | 0.00  | 0.00  | NaN   |
| 9148 | NEURL    | 0.00  | -0.13 | -0.05 | 0.05  |
| 9149 | DYRK1B   | 0.00  | 0.00  | 0.00  | NaN   |
| 9150 | CTDP1    | -0.09 | 0.00  | -0.25 | 0.51  |
| 9153 | SLC28A2  | 0.00  | 0.00  | 0.00  | NaN   |
| 9154 | SLC28A1  | 0.00  | 0.00  | -0.05 | 0.11  |
| 9156 | EXO1     | 0.00  | 0.00  | 0.00  | NaN   |

|      |         |       |       |       |       |
|------|---------|-------|-------|-------|-------|
| 9158 | FIBP    | -0.09 | 0.00  | 0.05  | 0.58  |
| 9159 | PCSK7   | -0.09 | 0.00  | 0.00  | -0.01 |
| 9162 | DGKI    | 0.00  | 0.00  | 0.00  | NaN   |
| 9166 | EBAG9   | 0.18  | 0.00  | 0.05  | 0.34  |
| 9167 | COX7A2L | 0.00  | 0.00  | 0.00  | NaN   |
| 9168 | TMSB10  | 0.00  | 0.00  | 0.00  | NaN   |
| 9169 | SFRS2IP | 0.00  | 0.00  | 0.00  | NaN   |
| 9170 | EDG4    | 0.00  | 0.00  | 0.00  | NaN   |
| 9172 | MYOM2   | -0.09 | -0.13 | -0.15 | -0.22 |
| 9173 | IL1RL1  | 0.00  | 0.00  | 0.00  | NaN   |
| 9175 | MAP3K13 | 0.09  | 0.00  | 0.00  | 0.32  |
| 9177 | HTR3B   | 0.00  | 0.00  | 0.00  | NaN   |
| 9179 | AP4M1   | 0.18  | 0.00  | 0.00  | 0.08  |
| 9180 | OSMR    | 0.00  | 0.00  | 0.05  | 0.28  |
| 9181 | ARHGEF2 | 0.00  | 0.13  | 0.00  | 0.14  |
| 9182 | PAMCI   | 0.00  | 0.13  | 0.00  | -0.08 |
| 9183 | ZW10    | 0.00  | 0.00  | 0.00  | NaN   |
| 9184 | BUB3    | 0.09  | 0.00  | -0.05 | 0.60  |
| 9187 | SLC24A1 | 0.00  | 0.00  | 0.00  | NaN   |
| 9188 | DDX21   | 0.00  | 0.00  | 0.00  | NaN   |
| 9191 | DEDD    | 0.00  | 0.00  | 0.00  | NaN   |
| 9194 | SLC16A7 | 0.00  | 0.00  | 0.00  | NaN   |
| 9196 | KCNAB3  | 0.00  | 0.00  | 0.00  | NaN   |
| 9197 | ACATN   | 0.00  | 0.00  | 0.00  | NaN   |
| 9200 | PTPLA   | 0.00  | 0.00  | 0.05  | -0.05 |
| 9201 | DCAMKL1 | 0.00  | 0.00  | 0.00  | NaN   |
| 9202 | ZNF262  | 0.00  | 0.00  | 0.00  | NaN   |
| 9204 | ZNF258  | 0.00  | 0.00  | 0.00  | NaN   |
| 9205 | ZNF237  | 0.00  | 0.00  | -0.05 | 0.34  |
| 9208 | LRRFIP1 | 0.00  | 0.00  | -0.05 | 0.36  |
| 9209 | LRRFIP2 | 0.00  | 0.00  | 0.00  | NaN   |
| 9211 | LGI1    | 0.00  | 0.00  | -0.05 | -0.19 |
| 9212 | STK12   | 0.00  | 0.00  | 0.00  | NaN   |
| 9214 | TOSO    | 0.00  | 0.13  | 0.00  | 0.32  |
| 9215 | LARGE   | 0.00  | 0.00  | 0.00  | NaN   |
| 9217 | VAPB    | 0.18  | 0.50  | 0.00  | 0.63  |
| 9218 | VAPA    | 0.00  | 0.00  | 0.00  | NaN   |
| 9219 | MTA1L1  | 0.00  | 0.00  | 0.00  | NaN   |
| 9220 | TIAF1   | 0.00  | 0.38  | 0.00  | 0.64  |
| 9221 | NOLC1   | 0.00  | -0.13 | -0.05 | 0.17  |
| 9223 | BAIAP1  | -0.09 | 0.00  | 0.00  | 0.00  |
| 9227 | LRAT    | 0.00  | 0.00  | 0.00  | 0.08  |
| 9228 | DLGAP2  | -0.09 | -0.25 | -0.15 | 0.01  |
| 9229 | DLGAP1  | 0.00  | 0.00  | 0.00  | NaN   |
| 9230 | RAB11B  | 0.00  | 0.00  | 0.00  | NaN   |
| 9231 | DLG5    | 0.09  | 0.00  | 0.00  | 0.46  |
| 9232 | PTTG1   | 0.00  | 0.00  | 0.00  | NaN   |

|      |             |       |       |       |       |
|------|-------------|-------|-------|-------|-------|
| 9235 | NK4         | 0.00  | 0.00  | 0.00  | NaN   |
| 9236 | CPR8        | 0.00  | 0.00  | 0.05  | 0.09  |
| 9238 | CPR2        | 0.00  | 0.00  | 0.00  | NaN   |
| 9240 | PNMA1       | 0.00  | 0.00  | 0.00  | NaN   |
| 9242 | MSC         | 0.00  | 0.25  | 0.00  | -0.04 |
| 9244 | CRLF1       | 0.00  | 0.00  | 0.00  | NaN   |
| 9245 | GCNT3       | 0.00  | 0.00  | 0.05  | 0.09  |
| 9246 | UBE2L6      | 0.00  | 0.00  | 0.00  | NaN   |
| 9247 | GCMB        | 0.00  | 0.00  | 0.05  | -0.02 |
| 9249 | SDR1        | 0.00  | 0.00  | 0.00  | NaN   |
| 9252 | RPS6KA5     | 0.00  | 0.13  | 0.00  | 0.55  |
| 9254 | CACNA2D2    | -0.09 | 0.00  | -0.05 | -0.04 |
| 9255 | SCYE1       | 0.00  | 0.00  | 0.00  | NaN   |
| 9256 | PRAX-1      | 0.09  | 0.00  | 0.00  | 0.29  |
| 9258 | MFHAS1      | -0.09 | -0.38 | -0.15 | 0.25  |
| 9260 | ENIGMA      | 0.00  | 0.00  | 0.00  | NaN   |
| 9261 | MAPKAPK2    | 0.00  | 0.13  | 0.00  | 0.46  |
| 9262 | STK17B      | 0.00  | 0.00  | 0.00  | NaN   |
| 9263 | STK17A      | 0.00  | 0.00  | 0.00  | NaN   |
| 9265 | PSCD3       | 0.00  | 0.00  | 0.10  | 0.05  |
| 9266 | PSCD2       | 0.09  | 0.00  | 0.00  | 0.26  |
| 9267 | PSCD1       | 0.00  | 0.13  | 0.00  | 0.11  |
| 9270 | ICAP-1A     | 0.09  | 0.00  | -0.05 | 0.40  |
| 9271 | PIWIL1      | 0.00  | 0.00  | 0.00  | NaN   |
| 9274 | BCL7C       | 0.00  | 0.00  | 0.00  | NaN   |
| 9275 | BCL7B       | -0.09 | 0.00  | 0.00  | 0.25  |
| 9276 | COPB2       | 0.00  | 0.00  | 0.00  | NaN   |
| 9277 | C6orf11     | 0.09  | 0.00  | 0.00  | 0.04  |
| 9278 | ZNF297      | 0.09  | 0.00  | 0.00  | -0.11 |
| 9283 | ET(B)R-LP-2 | 0.00  | 0.00  | 0.00  | NaN   |
| 9284 | NPIP        | 0.00  | 0.00  | 0.00  | NaN   |
| 9287 | GPR58       | 0.00  | 0.00  | 0.00  | NaN   |
| 9289 | GPR56       | -0.09 | 0.00  | 0.00  | -0.07 |
| 9293 | GPR52       | 0.00  | 0.00  | 0.05  | -0.37 |
| 9294 | EDG5        | 0.00  | 0.00  | 0.05  | -0.15 |
| 9295 | SFRS11      | 0.00  | 0.00  | 0.00  | NaN   |
| 9296 | ATP6V1F     | 0.00  | 0.25  | 0.00  | 0.54  |
| 9306 | CIS4        | 0.00  | 0.00  | 0.50  | 0.17  |
| 9308 | CD83        | 0.00  | 0.00  | 0.10  | 0.54  |
| 9310 | ZFP93       | 0.09  | 0.00  | 0.00  | 0.10  |
| 9311 | ACCN3       | 0.00  | 0.00  | -0.05 | 0.20  |
| 9312 | KCNB2       | 0.00  | 0.25  | 0.00  | 0.25  |
| 9313 | MMP20       | 0.00  | 0.13  | 0.00  | -0.01 |
| 9314 | KLF4        | 0.00  | 0.00  | 0.00  | NaN   |
| 9315 | P311        | 0.00  | 0.13  | 0.00  | 0.01  |
| 9317 | PTER        | 0.00  | 0.00  | 0.05  | 0.56  |
| 9318 | TRIP15      | 0.00  | 0.00  | 0.00  | NaN   |

|      |          |       |       |       |       |
|------|----------|-------|-------|-------|-------|
| 9319 | TRIP13   | 0.00  | 0.13  | 0.10  | 0.53  |
| 9320 | TRIP12   | 0.00  | 0.00  | 0.00  | NaN   |
| 9321 | TRIP11   | 0.00  | 0.13  | 0.00  | 0.12  |
| 9322 | TRIP10   | 0.00  | 0.00  | 0.00  | NaN   |
| 9324 | TRIP7    | 0.00  | 0.00  | 0.00  | NaN   |
| 9325 | TRIP4    | 0.00  | 0.00  | -0.05 | -0.07 |
| 9326 | TRIP3    | 0.00  | -0.13 | 0.00  | 0.33  |
| 9328 | GTF3C5   | 0.00  | 0.00  | 0.00  | NaN   |
| 9329 | GTF3C4   | 0.00  | 0.00  | 0.00  | NaN   |
| 9330 | GTF3C3   | 0.00  | 0.00  | 0.00  | NaN   |
| 9331 | B4GALT6  | 0.00  | 0.00  | -0.10 | 0.23  |
| 9332 | CD163    | -0.09 | 0.00  | 0.00  | 0.06  |
| 9333 | TGM5     | 0.00  | 0.00  | 0.50  | 0.05  |
| 9334 | B4GALT5  | 0.09  | 0.25  | 0.05  | 0.33  |
| 9337 | CNOT8    | 0.00  | 0.00  | 0.00  | NaN   |
| 9340 | GLP2R    | 0.00  | 0.00  | 0.00  | NaN   |
| 9341 | VAMP3    | 0.00  | 0.00  | 0.00  | NaN   |
| 9342 | SNAP29   | 0.00  | 0.13  | 0.00  | 0.54  |
| 9344 | TAO1     | 0.00  | 0.00  | 0.00  | NaN   |
| 9348 | NDST3    | 0.00  | 0.00  | 0.00  | NaN   |
| 9350 | CER1     | 0.00  | 0.00  | 0.05  | -0.22 |
| 9351 | SLC9A3R2 | 0.00  | 0.13  | 0.00  | 0.17  |
| 9352 | TXNL     | -0.09 | 0.00  | -0.20 | 0.68  |
| 9353 | SLIT2    | 0.00  | 0.00  | -0.05 | 0.04  |
| 9354 | UBE4A    | 0.00  | 0.00  | 0.00  | NaN   |
| 9355 | LHX2     | 0.00  | 0.00  | 0.00  | NaN   |
| 9356 | SLC22A6  | 0.00  | 0.00  | 0.00  | NaN   |
| 9358 | ITGBL1   | -0.09 | -0.13 | 0.05  | 0.08  |
| 9360 | PPIG     | 0.00  | 0.00  | 0.00  | NaN   |
| 9361 | PRSS15   | 0.00  | 0.00  | 0.00  | NaN   |
| 9362 | CPNE6    | 0.00  | 0.00  | 0.00  | NaN   |
| 9364 | RAB28    | 0.00  | 0.00  | -0.05 | 0.06  |
| 9365 | KL       | 0.00  | 0.00  | 0.00  | NaN   |
| 9368 | SLC9A3R1 | 0.00  | 0.13  | 0.00  | 0.34  |
| 9369 | NRXN3    | 0.00  | 0.00  | 0.00  | NaN   |
| 9370 | APM1     | 0.09  | 0.00  | 0.05  | -0.09 |
| 9371 | KIF3B    | 0.00  | 0.00  | 0.05  | 0.31  |
| 9372 | MADHIP   | 0.00  | 0.00  | 0.00  | NaN   |
| 9373 | PLAA     | 0.00  | -0.25 | -0.05 | 0.70  |
| 9374 | PPT2     | 0.00  | 0.00  | 0.00  | NaN   |
| 9375 | TM9SF2   | -0.09 | -0.13 | -0.05 | 0.24  |
| 9376 | SLC22A8  | 0.00  | 0.00  | 0.00  | NaN   |
| 9377 | COX5A    | 0.00  | 0.00  | 0.00  | NaN   |
| 9378 | NRXN1    | 0.00  | 0.00  | 0.00  | NaN   |
| 9379 | NRXN2    | 0.00  | 0.00  | 0.00  | NaN   |
| 9380 | GRHPR    | -0.09 | 0.00  | 0.10  | 0.61  |
| 9381 | OTOF     | 0.09  | -0.13 | 0.05  | -0.15 |



|      |           |       |       |       |       |
|------|-----------|-------|-------|-------|-------|
| 9388 | LIPG      | -0.09 | -0.13 | -0.20 | 0.12  |
| 9389 | ORCTL4    | 0.00  | 0.00  | 0.00  | NaN   |
| 9390 | ORCTL3    | 0.00  | 0.25  | 0.00  | 0.22  |
| 9391 | CIAO1     | 0.00  | 0.00  | 0.00  | NaN   |
| 9392 | TRAP-1    | 0.00  | 0.00  | 0.00  | NaN   |
| 9394 | HS6ST     | 0.00  | 0.00  | -0.05 | 0.13  |
| 9397 | NMT2      | 0.00  | 0.00  | 0.05  | -0.05 |
| 9398 | IGSF2     | 0.09  | 0.00  | 0.10  | -0.01 |
| 9399 | STOML1    | 0.00  | 0.00  | 0.00  | NaN   |
| 9400 | RECQL5    | 0.18  | 0.13  | 0.00  | 0.27  |
| 9401 | RECQL4    | 0.18  | 0.00  | 0.10  | 0.33  |
| 9402 | GRAP2     | -0.09 | 0.00  | 0.05  | 0.05  |
| 9403 | 9/15/2010 | 0.00  | 0.00  | 0.05  | 0.46  |
| 9407 | HAT       | 0.00  | 0.00  | 0.00  | NaN   |
| 9409 | PEX16     | 0.00  | 0.00  | 0.00  | NaN   |
| 9410 | HPRP8BP   | 0.00  | 0.00  | 0.00  | NaN   |
| 9411 | PARG1     | 0.09  | 0.00  | 0.00  | 0.31  |
| 9412 | SURB7     | 0.00  | 0.00  | 0.00  | NaN   |
| 9413 | X123      | 0.00  | 0.00  | 0.00  | NaN   |
| 9414 | TJP2      | 0.00  | 0.00  | 0.05  | -0.01 |
| 9415 | FADS2     | -0.09 | 0.00  | 0.00  | 0.18  |
| 9416 | U5-100K   | 0.00  | 0.00  | 0.00  | NaN   |
| 9419 | CRIPT     | 0.00  | 0.00  | 0.00  | NaN   |
| 9420 | CYP7B1    | 0.00  | 0.00  | 0.00  | NaN   |
| 9421 | HAND1     | 0.00  | 0.00  | 0.00  | NaN   |
| 9422 | ZNF264    | 0.09  | 0.13  | 0.00  | 0.37  |
| 9423 | NTN1      | 0.00  | 0.00  | 0.00  | NaN   |
| 9425 | CDYL      | 0.00  | 0.00  | 0.00  | NaN   |
| 9427 | ECEL1     | 0.00  | 0.00  | 0.00  | NaN   |
| 9429 | ABCG2     | 0.00  | 0.00  | 0.00  | NaN   |
| 9435 | CHST2     | 0.00  | 0.00  | -0.05 | 0.14  |
| 9436 | LY95      | 0.00  | 0.00  | 0.05  | -0.03 |
| 9437 | LY94      | 0.09  | 0.00  | 0.00  | 0.27  |
| 9439 | CRSP3     | 0.00  | 0.00  | 0.00  | NaN   |
| 9440 | CRSP6     | 0.00  | 0.00  | -0.10 | 0.13  |
| 9442 | CRSP8     | 0.00  | 0.00  | 0.00  | NaN   |
| 9443 | CRSP9     | 0.00  | 0.00  | 0.00  | NaN   |
| 9444 | QKI       | 0.00  | 0.00  | 0.00  | NaN   |
| 9445 | ITM2B     | 0.00  | 0.00  | 0.00  | NaN   |
| 9446 | GSTTLp28  | 0.09  | -0.13 | -0.05 | 0.17  |
| 9447 | AIM2      | 0.00  | 0.00  | 0.00  | NaN   |
| 9448 | MAP4K4    | 0.00  | 0.00  | 0.00  | NaN   |
| 9450 | MD-1      | 0.00  | 0.00  | 0.00  | NaN   |
| 9451 | EIF2AK3   | 0.00  | 0.00  | -0.05 | 0.16  |
| 9453 | GGPS1     | 0.09  | 0.00  | 0.00  | 0.43  |
| 9454 | HOMER-3   | 0.00  | 0.00  | 0.00  | NaN   |
| 9455 | HOMER-2B  | 0.00  | 0.00  | 0.05  | -0.20 |

|      |           |       |       |       |       |
|------|-----------|-------|-------|-------|-------|
| 9456 | SYN47     | 0.00  | 0.00  | -0.05 | 0.26  |
| 9457 | ACT       | 0.00  | 0.00  | 0.00  | NaN   |
| 9462 | RASAL2    | 0.00  | 0.00  | 0.00  | NaN   |
| 9463 | PRKCABP   | -0.09 | 0.00  | 0.05  | -0.02 |
| 9464 | HAND2     | 0.00  | 0.00  | -0.05 | -0.08 |
| 9465 | AKAP7     | 0.00  | 0.00  | 0.00  | NaN   |
| 9466 | WSX1      | 0.00  | 0.00  | 0.00  | NaN   |
| 9467 | SH3BP5    | 0.00  | 0.00  | 0.05  | 0.14  |
| 9469 | CHST3     | 0.09  | 0.00  | 0.00  | 0.10  |
| 9470 | EIF4EL3   | 0.00  | 0.00  | 0.00  | NaN   |
| 9472 | AKAP6     | 0.00  | 0.00  | 0.00  | NaN   |
| 9473 | ICB-1     | 0.00  | 0.00  | 0.00  | NaN   |
| 9474 | APG5L     | 0.00  | 0.00  | 0.10  | 0.60  |
| 9475 | ROCK2     | 0.00  | 0.00  | 0.00  | NaN   |
| 9477 | TRFP      | 0.00  | 0.00  | 0.05  | -0.25 |
| 9479 | MAPK8IP1  | 0.00  | 0.00  | 0.00  | NaN   |
| 9480 | ONECUT2   | -0.09 | 0.00  | -0.20 | 0.27  |
| 9482 | STX8      | 0.00  | 0.00  | 0.00  | NaN   |
| 9486 | HNK-1ST   | 0.00  | 0.00  | 0.00  | NaN   |
| 9487 | PIGL      | 0.00  | 0.00  | 0.00  | NaN   |
| 9488 | PIGB      | 0.00  | 0.00  | 0.05  | 0.22  |
| 9489 | PGS1      | 0.00  | 0.13  | 0.00  | 0.39  |
| 9491 | PSMF1     | 0.00  | 0.00  | 0.00  | NaN   |
| 9493 | KNSL5     | 0.00  | 0.00  | 0.00  | NaN   |
| 9495 | AKAP5     | 0.00  | 0.00  | 0.00  | NaN   |
| 9496 | TBX4      | 0.27  | 0.13  | 0.00  | -0.05 |
| 9497 | SLC4A7    | 0.00  | 0.00  | 0.00  | NaN   |
| 9498 | SLC4A8    | 0.00  | 0.00  | 0.00  | NaN   |
| 9499 | TTID      | 0.00  | -0.13 | 0.00  | -0.09 |
| 9501 | RPH3AL    | 0.00  | -0.13 | 0.10  | -0.09 |
| 9508 | ADAMTS3   | 0.00  | 0.00  | 0.05  | 0.02  |
| 9509 | ADAMTS2   | 0.00  | 0.00  | 0.00  | NaN   |
| 9512 | PMPCB     | 0.09  | 0.00  | 0.00  | 0.00  |
| 9513 | FXR2      | 0.00  | 0.00  | 0.00  | NaN   |
| 9514 | CST       | 0.00  | 0.00  | 0.00  | NaN   |
| 9515 | STXBP-TOM | 0.00  | 0.00  | 0.00  | NaN   |
| 9516 | PIG7      | 0.00  | 0.00  | 0.00  | NaN   |
| 9517 | SPTLC2    | 0.00  | 0.00  | 0.00  | NaN   |
| 9518 | PLAB      | 0.00  | 0.00  | 0.00  | NaN   |
| 9519 | TBPL1     | 0.00  | 0.00  | 0.00  | NaN   |
| 9520 | NPEPPS    | 0.00  | -0.13 | 0.00  | 0.19  |
| 9521 | EEF1E1    | 0.00  | 0.00  | 0.00  | NaN   |
| 9522 | SCAMP1    | 0.00  | 0.00  | 0.00  | NaN   |
| 9524 | GPSN2     | 0.00  | 0.00  | 0.00  | NaN   |
| 9525 | SKD1      | -0.09 | 0.00  | -0.15 | 0.33  |
| 9526 | MPDU1     | 0.00  | 0.00  | 0.00  | NaN   |
| 9527 | GOSR1     | 0.00  | 0.38  | 0.00  | 0.08  |

|      |              |       |       |       |       |
|------|--------------|-------|-------|-------|-------|
| 9528 | C1orf8       | 0.00  | 0.00  | 0.00  | NaN   |
| 9529 | BAG5         | 0.09  | 0.00  | 0.00  | 0.47  |
| 9530 | BAG4         | 0.45  | -0.13 | -0.05 | 0.62  |
| 9531 | BAG3         | 0.00  | 0.00  | 0.00  | 0.14  |
| 9532 | BAG2         | 0.00  | 0.13  | 0.00  | -0.13 |
| 9533 | RPA40        | 0.00  | 0.00  | 0.00  | NaN   |
| 9534 | ZNF254       | 0.00  | -0.25 | 0.00  | 0.23  |
| 9535 | GMFG         | 0.00  | 0.00  | 0.00  | NaN   |
| 9536 | PTGES        | 0.00  | 0.00  | 0.00  | NaN   |
| 9537 | PIG11        | 0.00  | 0.00  | 0.00  | NaN   |
| 9538 | PIG8         | -0.09 | 0.00  | -0.10 | 0.58  |
| 9540 | PIG3         | 0.09  | 0.00  | -0.05 | 0.11  |
| 9542 | NRG2         | 0.00  | 0.00  | 0.00  | NaN   |
| 9545 | RAB3D        | 0.00  | 0.00  | 0.00  | NaN   |
| 9546 | APBA3        | 0.00  | 0.00  | 0.00  | NaN   |
| 9547 | SCYB14       | 0.00  | -0.13 | 0.00  | -0.01 |
| 9550 | ATP6V1G1     | 0.00  | 0.00  | 0.00  | NaN   |
| 9551 | ATP5J2       | 0.18  | 0.00  | 0.00  | 0.48  |
| 9552 | SPAG7        | 0.00  | 0.00  | 0.00  | NaN   |
| 9553 | MRPL33       | 0.09  | 0.00  | 0.05  | 0.38  |
| 9554 | SEC22L1      | 0.00  | 0.00  | 0.05  | -0.12 |
| 9555 | H2AFY        | 0.00  | 0.00  | 0.00  | 0.18  |
| 9556 | C14orf2      | 0.00  | 0.00  | 0.00  | NaN   |
| 9557 | CHD1L        | 0.00  | 0.00  | 0.05  | 0.02  |
| 9559 | VPS26        | 0.00  | 0.00  | 0.00  | NaN   |
| 9562 | MINPP1       | 0.09  | 0.00  | -0.15 | 0.61  |
| 9563 | H6PD         | 0.00  | 0.00  | -0.05 | 0.11  |
| 9567 | GTPBP1       | -0.09 | 0.00  | 0.05  | 0.02  |
| 9568 | GPR51        | 0.00  | 0.00  | 0.00  | NaN   |
| 9569 | GTF2IRD1     | -0.09 | 0.00  | 0.00  | 0.13  |
| 9570 | GOSR2        | 0.00  | -0.13 | 0.00  | 0.20  |
| 9572 | NR1D1        | 0.00  | 0.38  | 0.00  | 0.42  |
| 9573 | GDF3         | -0.09 | 0.00  | 0.00  | -0.15 |
| 9575 | CLOCK        | 0.00  | 0.00  | 0.00  | NaN   |
| 9576 | SPAG6        | -0.09 | 0.00  | 0.05  | -0.02 |
| 9577 | BRE          | 0.09  | 0.00  | 0.05  | 0.11  |
| 9578 | CDC42BPB     | 0.00  | 0.00  | 0.00  | NaN   |
| 9580 | SOX13        | 0.00  | 0.13  | 0.00  | 0.29  |
| 9581 | KIAA0436     | 0.00  | 0.00  | 0.00  | NaN   |
| 9582 | DJ742C19.2   | 0.00  | 0.13  | 0.15  | -0.04 |
| 9583 | LYSAL1       | -0.09 | -0.25 | -0.15 | 0.38  |
| 9584 | RNPC2        | 0.00  | 0.00  | 0.00  | NaN   |
| 9585 | MPHOSPH1     | 0.09  | 0.00  | 0.00  | 0.64  |
| 9586 | H_GS165L15.1 | 0.00  | 0.13  | 0.00  | 0.03  |
| 9587 | KIAA0110     | 0.00  | 0.00  | 0.00  | NaN   |
| 9588 | AOP2         | 0.00  | 0.00  | 0.00  | NaN   |
| 9589 | WTAP         | 0.00  | 0.00  | 0.00  | NaN   |

|      |          |       |       |       |       |
|------|----------|-------|-------|-------|-------|
| 9590 | AKAP12   | 0.00  | 0.00  | 0.00  | NaN   |
| 9592 | ETR101   | 0.00  | 0.00  | 0.00  | NaN   |
| 9595 | PSCDBP   | 0.00  | 0.00  | -0.05 | -0.03 |
| 9597 | DAMS     | 0.00  | -0.13 | 0.00  | -0.11 |
| 9600 | PITPNM   | 0.36  | 0.00  | 0.05  | 0.24  |
| 9601 | ERP70    | 0.00  | 0.00  | -0.05 | -0.08 |
| 9603 | NFE2L3   | 0.00  | 0.13  | 0.00  | -0.12 |
| 9604 | RNF14    | 0.00  | 0.00  | 0.00  | NaN   |
| 9605 | C16orf7  | -0.09 | -0.13 | -0.05 | 0.19  |
| 9607 | CART     | 0.00  | 0.00  | 0.00  | NaN   |
| 9609 | RAB36    | 0.00  | 0.00  | 0.00  | NaN   |
| 9610 | RIN1     | 0.00  | 0.00  | 0.05  | 0.43  |
| 9611 | NCOR1    | 0.00  | 0.00  | 0.00  | NaN   |
| 9612 | NCOR2    | -0.09 | 0.00  | -0.05 | 0.61  |
| 9616 | RNF7     | 0.00  | 0.00  | 0.00  | NaN   |
| 9617 | MTRF1    | 0.00  | 0.00  | -0.05 | 0.06  |
| 9618 | TRAF4    | 0.00  | 0.38  | 0.00  | 0.60  |
| 9619 | ABCG1    | 0.00  | 0.00  | 0.00  | NaN   |
| 9620 | CELSR1   | 0.00  | 0.00  | 0.00  | NaN   |
| 9623 | TCL1B    | 0.00  | 0.00  | 0.00  | NaN   |
| 9625 | AATK     | 0.00  | 0.00  | 0.00  | NaN   |
| 9627 | SNCAIP   | 0.00  | 0.00  | 0.00  | NaN   |
| 9628 | RGS6     | 0.00  | 0.00  | 0.00  | NaN   |
| 9629 | CLCA3    | 0.00  | 0.00  | 0.10  | 0.33  |
| 9630 | GNA14    | 0.00  | 0.00  | -0.05 | 0.06  |
| 9631 | NUP155   | 0.00  | 0.00  | 0.05  | 0.33  |
| 9632 | SEC24C   | 0.09  | 0.00  | 0.00  | 0.30  |
| 9633 | MTL5     | 0.45  | 0.00  | 0.00  | 0.33  |
| 9635 | CLCA2    | 0.00  | 0.00  | 0.10  | -0.13 |
| 9636 | ISG15    | 0.00  | 0.00  | 0.00  | NaN   |
| 9637 | FEZ2     | 0.00  | 0.00  | 0.00  | NaN   |
| 9638 | FEZ1     | -0.09 | 0.00  | -0.10 | -0.01 |
| 9639 | ARHGEF10 | -0.09 | -0.25 | -0.15 | 0.23  |
| 9640 | KIAA0211 | 0.00  | 0.00  | -0.05 | 0.26  |
| 9641 | IKKE     | 0.00  | 0.13  | 0.00  | 0.39  |
| 9644 | KIAA0418 | 0.00  | -0.13 | -0.05 | 0.31  |
| 9645 | KIAA0750 | 0.00  | 0.00  | 0.00  | NaN   |
| 9646 | TSBP     | 0.00  | 0.00  | 0.00  | NaN   |
| 9647 | KIAA0015 | -0.09 | 0.00  | 0.00  | 0.35  |
| 9648 | KIAA0336 | 0.00  | 0.00  | 0.00  | NaN   |
| 9649 | RALGPS1A | 0.09  | 0.00  | -0.05 | 0.51  |
| 9650 | KIAA0009 | 0.00  | 0.00  | 0.05  | 0.33  |
| 9651 | KIAA0450 | 0.00  | 0.00  | 0.00  | NaN   |
| 9652 | KIAA0372 | 0.00  | 0.00  | 0.00  | NaN   |
| 9653 | HS2ST1   | 0.00  | 0.00  | 0.05  | 0.35  |
| 9654 | KIAA0173 | 0.00  | 0.00  | 0.00  | NaN   |
| 9655 | SOCS5    | 0.00  | 0.00  | 0.00  | NaN   |

|      |          |       |       |       |       |
|------|----------|-------|-------|-------|-------|
| 9656 | KIAA0170 | 0.00  | 0.00  | 0.00  | NaN   |
| 9657 | KIAA0036 | 0.00  | 0.00  | 0.05  | 0.68  |
| 9658 | KIAA0222 | -0.09 | 0.00  | -0.25 | 0.04  |
| 9659 | PDE4DIP  | 0.00  | 0.00  | 0.05  | 0.17  |
| 9662 | KIAA0635 | 0.00  | 0.00  | 0.00  | NaN   |
| 9663 | LPIN2    | -0.09 | 0.00  | -0.05 | 0.36  |
| 9666 | KIAA0675 | 0.00  | 0.00  | 0.00  | NaN   |
| 9667 | KIAA0138 | 0.00  | 0.00  | 0.00  | NaN   |
| 9668 | KIAA0798 | 0.00  | 0.00  | -0.05 | 0.04  |
| 9669 | IF2      | 0.00  | 0.00  | 0.00  | NaN   |
| 9670 | IMP13    | 0.00  | 0.00  | 0.00  | NaN   |
| 9672 | SDC3     | 0.00  | 0.00  | 0.00  | NaN   |
| 9673 | KIAA0446 | 0.00  | 0.13  | 0.00  | -0.01 |
| 9674 | KIAA0040 | 0.00  | 0.00  | 0.00  | NaN   |
| 9675 | KIAA0406 | 0.00  | 0.00  | 0.00  | NaN   |
| 9677 | KIAA0377 | 0.00  | 0.00  | 0.00  | NaN   |
| 9678 | KIAA0783 | 0.00  | 0.13  | 0.05  | -0.20 |
| 9679 | KIAA0140 | 0.00  | 0.00  | -0.05 | 0.13  |
| 9681 | KIAA0645 | 0.00  | 0.00  | 0.00  | NaN   |
| 9682 | KIAA0677 | 0.00  | 0.00  | 0.00  | NaN   |
| 9683 | N4BP1    | -0.09 | 0.00  | 0.00  | 0.42  |
| 9684 | KIAA0014 | 0.18  | 0.00  | 0.10  | 0.52  |
| 9685 | KIAA0171 | 0.00  | 0.00  | 0.00  | NaN   |
| 9686 | KIAA0121 | 0.00  | 0.00  | 0.00  | NaN   |
| 9687 | KIAA0575 | 0.00  | 0.00  | 0.00  | NaN   |
| 9688 | KIAA0095 | -0.09 | 0.00  | 0.00  | 0.39  |
| 9689 | BZAP45   | 0.00  | 0.00  | 0.00  | NaN   |
| 9690 | KIAA0010 | 0.00  | 0.00  | -0.05 | 0.04  |
| 9692 | KIAA0391 | 0.00  | 0.00  | 0.00  | NaN   |
| 9693 | PDZ-GEF1 | 0.00  | 0.00  | 0.00  | 0.54  |
| 9694 | KIAA0103 | 0.18  | -0.13 | 0.00  | 0.58  |
| 9695 | KIAA0212 | 0.00  | 0.00  | 0.05  | 0.12  |
| 9696 | KIAA0445 | 0.00  | 0.00  | 0.00  | NaN   |
| 9697 | KIAA0057 | 0.00  | 0.00  | 0.00  | NaN   |
| 9698 | PUM1     | 0.00  | 0.00  | 0.00  | NaN   |
| 9699 | RAB3IP3  | 0.18  | -0.25 | 0.00  | 0.08  |
| 9700 | ESPL1    | 0.00  | 0.00  | 0.00  | NaN   |
| 9701 | KIAA0685 | 0.00  | -0.25 | -0.05 | 0.32  |
| 9702 | KIAA0092 | 0.00  | 0.00  | 0.00  | NaN   |
| 9703 | KIAA0100 | 0.00  | 0.38  | 0.00  | 0.50  |
| 9704 | DDX34    | 0.09  | 0.00  | -0.05 | 0.15  |
| 9705 | KIAA0535 | 0.00  | 0.00  | 0.00  | NaN   |
| 9706 | ULK2     | 0.00  | -0.13 | 0.00  | 0.17  |
| 9708 | PCDHGA8  | 0.00  | 0.00  | 0.00  | NaN   |
| 9709 | HERPUD1  | -0.09 | 0.00  | 0.00  | 0.11  |
| 9710 | KIAA0355 | 0.00  | 0.00  | 0.05  | 0.17  |
| 9711 | KIAA0226 | 0.18  | 0.00  | 0.00  | 0.58  |

|      |             |       |       |       |       |
|------|-------------|-------|-------|-------|-------|
| 9712 | RNTRE       | 0.00  | 0.00  | 0.00  | NaN   |
| 9715 | KIAA0773    | 0.00  | 0.00  | -0.05 | 0.16  |
| 9716 | KIAA0560    | 0.00  | 0.00  | 0.00  | NaN   |
| 9717 | KIAA0420    | 0.00  | 0.00  | 0.00  | NaN   |
| 9718 | ECE2        | 0.09  | 0.00  | 0.00  | 0.07  |
| 9719 | KIAA0605    | 0.00  | 0.00  | 0.00  | NaN   |
| 9720 | KIAA0565    | 0.00  | 0.00  | 0.00  | NaN   |
| 9721 | KIAA0514    | 0.00  | 0.00  | 0.00  | NaN   |
| 9722 | CAPON       | 0.00  | 0.00  | 0.00  | NaN   |
| 9723 | SEMA3E      | 0.09  | 0.00  | 0.00  | -0.11 |
| 9724 | KIAA0266    | 0.00  | 0.00  | 0.00  | NaN   |
| 9725 | KIAA0792    | 0.09  | 0.00  | 0.00  | 0.03  |
| 9726 | KIAA0296    | 0.00  | 0.00  | 0.00  | NaN   |
| 9727 | Rab11-FIP3  | 0.00  | 0.00  | -0.05 | 0.10  |
| 9728 | KIAA0256    | 0.00  | 0.00  | 0.00  | NaN   |
| 9729 | KIAA0408    | 0.00  | 0.00  | 0.05  | 0.15  |
| 9730 | KIAA0800    | -0.09 | 0.00  | -0.10 | 0.30  |
| 9731 | KIAA0562    | 0.00  | 0.00  | 0.00  | NaN   |
| 9732 | KIAA0716    | 0.09  | 0.00  | 0.00  | -0.12 |
| 9733 | SART3       | 0.00  | -0.13 | 0.00  | 0.25  |
| 9734 | HDAC9-PEND1 | 0.00  | 0.50  | 0.50  | 0.18  |
| 9735 | KNTC1       | 0.00  | -0.13 | 0.00  | 0.16  |
| 9736 | KIAA0570    | 0.00  | 0.00  | 0.00  | NaN   |
| 9738 | KIAA0419    | 0.00  | 0.00  | 0.00  | NaN   |
| 9739 | KIAA0339    | 0.00  | 0.00  | 0.00  | NaN   |
| 9741 | LAPTM4A     | 0.09  | 0.00  | -0.05 | 0.61  |
| 9742 | KIAA0590    | 0.00  | 0.00  | 0.00  | NaN   |
| 9743 | KIAA0712    | -0.09 | 0.00  | -0.10 | 0.30  |
| 9744 | CENTB1      | 0.00  | 0.00  | 0.00  | NaN   |
| 9745 | KIAA0390    | 0.00  | 0.13  | 0.05  | -0.05 |
| 9746 | CLSTN3      | 0.00  | 0.00  | 0.00  | 0.27  |
| 9747 | KIAA0738    | 0.00  | 0.13  | 0.00  | 0.16  |
| 9749 | KIAA0680    | 0.00  | 0.00  | 0.00  | NaN   |
| 9750 | C6orf32     | 0.00  | 0.00  | 0.05  | -0.03 |
| 9751 | SNPH        | 0.00  | 0.00  | 0.00  | NaN   |
| 9752 | PCDHA9      | 0.00  | -0.25 | 0.00  | 0.09  |
| 9753 | KIAA0426    | 0.00  | 0.00  | 0.00  | NaN   |
| 9755 | KIAA0775    | 0.00  | -0.13 | 0.00  | -0.19 |
| 9759 | HDAC4       | 0.00  | -0.13 | -0.05 | 0.21  |
| 9760 | TOX         | 0.00  | 0.00  | 0.00  | NaN   |
| 9761 | KIAA0152    | 0.00  | -0.13 | 0.00  | 0.21  |
| 9762 | KIAA0552    | 0.00  | 0.00  | 0.00  | NaN   |
| 9764 | KIAA0513    | -0.09 | 0.00  | -0.05 | 0.17  |
| 9765 | ENDOFIN     | 0.00  | 0.00  | -0.05 | 0.24  |
| 9766 | KIAA0247    | 0.00  | 0.00  | 0.00  | NaN   |
| 9768 | KIAA0101    | 0.00  | 0.00  | 0.00  | -0.18 |
| 9770 | RASSF2      | 0.00  | 0.00  | 0.00  | NaN   |

|      |            |       |       |       |       |
|------|------------|-------|-------|-------|-------|
| 9771 | GFR        | 0.00  | 0.13  | 0.05  | 0.13  |
| 9772 | KIAA0195   | 0.18  | 0.13  | 0.00  | 0.39  |
| 9774 | BTF        | 0.00  | 0.00  | 0.00  | NaN   |
| 9775 | KIAA0111   | 0.00  | 0.25  | 0.05  | 0.19  |
| 9776 | KIAA0652   | 0.00  | 0.00  | 0.00  | NaN   |
| 9777 | KIAA0255   | 0.00  | 0.00  | 0.05  | 0.29  |
| 9778 | KIAA0232   | 0.00  | -0.13 | -0.10 | 0.33  |
| 9779 | KIAA0210   | 0.00  | 0.00  | 0.00  | NaN   |
| 9780 | KIAA0233   | -0.09 | -0.13 | -0.05 | 0.35  |
| 9781 | KIAA0161   | 0.00  | 0.00  | -0.05 | -0.02 |
| 9782 | MATR3      | 0.00  | 0.00  | 0.00  | NaN   |
| 9783 | KIAA0237   | 0.00  | 0.00  | 0.00  | NaN   |
| 9784 | SNX17      | 0.09  | 0.00  | 0.05  | 0.50  |
| 9785 | DDX38      | 0.00  | 0.00  | 0.05  | 0.29  |
| 9786 | KIAA0586   | 0.00  | 0.00  | 0.05  | 0.45  |
| 9787 | KIAA0008   | 0.00  | 0.00  | 0.05  | 0.32  |
| 9788 | KIAA0429   | 0.18  | 0.38  | -0.05 | 0.22  |
| 9789 | KIAA0102   | 0.09  | 0.00  | 0.00  | 0.66  |
| 9790 | KIAA0187   | 0.00  | 0.00  | 0.00  | NaN   |
| 9791 | PTDSS1     | 0.00  | -0.13 | 0.05  | 0.45  |
| 9792 | TRIP-Br2   | 0.00  | 0.00  | 0.00  | NaN   |
| 9793 | KIAA0097   | 0.00  | 0.00  | 0.00  | NaN   |
| 9794 | MAML1      | 0.00  | 0.00  | 0.05  | 0.22  |
| 9796 | PHYHIP     | -0.09 | -0.25 | -0.10 | 0.11  |
| 9797 | KIAA0218   | 0.00  | 0.00  | 0.00  | NaN   |
| 9798 | KIAA0174   | 0.00  | 0.00  | 0.05  | 0.38  |
| 9801 | MRPL19     | 0.00  | 0.00  | 0.00  | NaN   |
| 9802 | DAZAP2     | 0.00  | 0.00  | 0.00  | NaN   |
| 9804 | TOMM20-PEN | 0.09  | 0.00  | 0.00  | 0.49  |
| 9805 | KIAA0193   | 0.00  | 0.13  | 0.00  | 0.10  |
| 9806 | KIAA0275   | 0.09  | 0.00  | 0.00  | -0.04 |
| 9807 | IHPK1      | -0.09 | 0.00  | -0.05 | 0.21  |
| 9808 | KIAA0087   | 0.00  | 0.13  | 0.00  | 0.31  |
| 9810 | RNF40      | 0.00  | 0.00  | 0.00  | NaN   |
| 9811 | KIAA0427   | -0.09 | -0.13 | -0.20 | 0.40  |
| 9812 | KIAA0141   | 0.00  | 0.00  | 0.00  | NaN   |
| 9813 | KIAA0494   | 0.00  | 0.00  | 0.00  | NaN   |
| 9814 | KIAA0542   | 0.00  | 0.00  | 0.00  | NaN   |
| 9815 | GIT2       | 0.00  | 0.00  | 0.00  | NaN   |
| 9816 | KIAA0133   | 0.09  | 0.00  | 0.00  | 0.03  |
| 9817 | KEAP1      | 0.00  | 0.00  | 0.05  | 0.34  |
| 9818 | KIAA0410   | 0.00  | -0.13 | -0.15 | 0.16  |
| 9819 | KIAA0669   | 0.00  | 0.00  | 0.05  | 0.44  |
| 9820 | KIAA0076   | 0.00  | 0.00  | 0.00  | NaN   |
| 9821 | RB1CC1     | 0.00  | 0.00  | 0.00  | NaN   |
| 9824 | ARHGAP11A  | 0.00  | 0.00  | 0.00  | NaN   |
| 9825 | SPATA2     | 0.27  | 0.25  | 0.10  | 0.70  |

|      |           |       |       |       |       |
|------|-----------|-------|-------|-------|-------|
| 9826 | ARHGEF11  | 0.00  | 0.00  | 0.00  | NaN   |
| 9827 | KIAA0258  | -0.09 | 0.00  | 0.10  | 0.74  |
| 9828 | KIAA0337  | 0.00  | 0.13  | 0.00  | 0.30  |
| 9829 | DNAJC6    | 0.00  | 0.00  | -0.05 | 0.23  |
| 9830 | TRIM14    | 0.00  | 0.00  | 0.00  | NaN   |
| 9831 | KIAA0628  | 0.18  | 0.00  | 0.10  | 0.68  |
| 9832 | KIAA0555  | 0.00  | 0.00  | 0.00  | NaN   |
| 9833 | MELK      | -0.09 | 0.00  | 0.10  | 0.52  |
| 9834 | KIAA0125  | 0.91  | 0.63  | 0.65  | 0.03  |
| 9836 | KIAA0547  | 0.00  | 0.00  | 0.00  | NaN   |
| 9837 | KIAA0186  | 0.00  | 0.00  | -0.05 | 0.24  |
| 9839 | ZFHX1B    | 0.00  | 0.00  | 0.00  | NaN   |
| 9840 | KIAA0748  | 0.00  | 0.00  | 0.00  | NaN   |
| 9841 | KIAA0441  | 0.00  | 0.00  | 0.05  | 0.53  |
| 9842 | KIAA0356  | 0.00  | -0.13 | 0.00  | 0.31  |
| 9844 | ELMO1     | 0.00  | 0.00  | 0.00  | NaN   |
| 9846 | GAB2      | 0.27  | 0.00  | 0.00  | 0.23  |
| 9847 | KIAA0528  | 0.00  | 0.00  | 0.00  | NaN   |
| 9848 | KIAA0626  | 0.00  | 0.00  | -0.05 | 0.16  |
| 9849 | KIAA0335  | 0.00  | 0.00  | 0.00  | -0.04 |
| 9851 | KIAA0753  | 0.00  | 0.00  | 0.00  | NaN   |
| 9852 | KIAA0766  | 0.00  | 0.00  | 0.00  | NaN   |
| 9853 | KIAA0375  | -0.09 | 0.00  | 0.10  | 0.44  |
| 9854 | KIAA0285  | -0.09 | 0.00  | -0.05 | 0.13  |
| 9855 | KIAA0793  | 0.00  | 0.00  | -0.05 | 0.21  |
| 9856 | KIAA0319  | 0.00  | 0.00  | 0.05  | -0.07 |
| 9857 | CAP350    | 0.00  | 0.00  | 0.00  | NaN   |
| 9858 | KIAA0649  | 0.00  | 0.00  | 0.00  | NaN   |
| 9859 | KIAA0470  | 0.09  | 0.00  | 0.00  | 0.24  |
| 9860 | KIAA0806  | 0.00  | 0.00  | 0.05  | 0.44  |
| 9861 | KIAA0107  | 0.09  | 0.00  | -0.05 | 0.70  |
| 9863 | AIP1      | -0.09 | 0.00  | 0.00  | 0.04  |
| 9865 | KIAA0644  | 0.00  | 0.13  | 0.00  | 0.23  |
| 9866 | KIAA0298  | 0.00  | 0.00  | -0.05 | -0.09 |
| 9867 | KIAA0438  | 0.00  | 0.13  | 0.00  | -0.03 |
| 9868 | TOMM70A   | 0.00  | 0.00  | 0.00  | NaN   |
| 9869 | SETDB1    | 0.00  | 0.00  | 0.05  | 0.59  |
| 9870 | KIAA0317  | 0.00  | 0.00  | 0.00  | NaN   |
| 9871 | SEC24D    | 0.00  | 0.00  | 0.00  | NaN   |
| 9873 | KIAA0769  | 0.00  | 0.00  | 0.00  | NaN   |
| 9874 | TLK1      | 0.00  | 0.00  | 0.00  | NaN   |
| 9875 | C21orf108 | 0.00  | 0.00  | 0.00  | NaN   |
| 9878 | KIAA0737  | 0.00  | 0.00  | 0.00  | NaN   |
| 9879 | KIAA0801  | 0.00  | -0.13 | 0.00  | 0.15  |
| 9880 | KIAA0352  | 0.00  | 0.00  | 0.00  | NaN   |
| 9881 | KIAA0342  | 0.00  | 0.00  | 0.00  | NaN   |
| 9882 | KIAA0603  | -0.09 | 0.13  | -0.15 | 0.58  |



|      |             |       |       |       |       |
|------|-------------|-------|-------|-------|-------|
| 9883 | KIAA0618    | -0.09 | 0.00  | 0.00  | 0.35  |
| 9884 | KIAA0563    | 0.09  | 0.00  | 0.00  | 0.15  |
| 9885 | OSBPL2      | 0.09  | 0.13  | 0.00  | 0.65  |
| 9886 | KIAA0740    | 0.00  | 0.00  | 0.00  | NaN   |
| 9887 | C1orf16     | 0.00  | 0.00  | 0.00  | NaN   |
| 9889 | KIAA0637    | 0.00  | -0.25 | 0.00  | 0.33  |
| 9890 | KIAA0455    | 0.00  | 0.00  | 0.00  | NaN   |
| 9891 | KIAA0537    | 0.00  | 0.00  | 0.00  | NaN   |
| 9892 | SNAP91      | 0.00  | 0.00  | 0.00  | NaN   |
| 9894 | KIAA0683    | 0.00  | 0.00  | 0.00  | NaN   |
| 9895 | KIAA0329    | 0.00  | 0.00  | 0.00  | NaN   |
| 9896 | SAC3        | 0.00  | 0.00  | 0.05  | 0.27  |
| 9897 | KIAA0196    | 0.18  | 0.38  | 0.00  | 0.66  |
| 9898 | KIAA0144    | 0.09  | 0.13  | 0.00  | 0.41  |
| 9899 | SV2B        | 0.00  | 0.00  | 0.00  | NaN   |
| 9900 | SV2         | 0.00  | 0.00  | 0.05  | -0.06 |
| 9901 | SRGAP3      | 0.50  | 0.50  | 0.00  | 0.27  |
| 9902 | ENDO180     | 0.27  | 0.13  | 0.00  | -0.10 |
| 9903 | KIAA0469    | 0.00  | 0.00  | 0.00  | NaN   |
| 9904 | KIAA0682    | 0.00  | 0.00  | 0.00  | NaN   |
| 9905 | KIAA0397    | 0.00  | -0.13 | 0.00  | 0.05  |
| 9906 | KIAA0447    | 0.00  | 0.00  | -0.05 | 0.26  |
| 9907 | KIAA0415    | 0.00  | 0.00  | 0.10  | 0.32  |
| 9908 | G3BP2       | 0.00  | 0.00  | 0.00  | NaN   |
| 9909 | KIAA0476    | 0.09  | 0.13  | 0.00  | 0.30  |
| 9910 | KIAA0471    | 0.00  | 0.00  | 0.05  | 0.31  |
| 9911 | KIAA0481    | 0.00  | 0.13  | 0.00  | -0.13 |
| 9912 | KIAA0672    | 0.00  | 0.00  | 0.00  | NaN   |
| 9913 | STAF65(gamm | 0.09  | 0.00  | 0.05  | 0.62  |
| 9914 | KIAA0703    | -0.09 | -0.13 | 0.00  | -0.02 |
| 9915 | ARNT2       | 0.00  | 0.00  | 0.00  | NaN   |
| 9917 | KIAA0475    | 0.00  | 0.00  | 0.00  | NaN   |
| 9919 | KIAA0310    | 0.00  | 0.00  | 0.00  | NaN   |
| 9920 | KIAA0711    | -0.09 | -0.13 | -0.15 | 0.16  |
| 9921 | RNF10       | 0.00  | -0.13 | 0.00  | 0.15  |
| 9922 | KIAA0763    | 0.00  | 0.00  | 0.00  | NaN   |
| 9923 | KIAA0478    | -0.09 | 0.00  | 0.00  | 0.04  |
| 9924 | KIAA0710    | 0.00  | 0.00  | 0.00  | NaN   |
| 9925 | KIAA0354    | -0.09 | 0.00  | 0.05  | 0.64  |
| 9926 | KIAA0205    | 0.00  | 0.00  | 0.00  | NaN   |
| 9927 | MFN2        | 0.00  | 0.00  | 0.00  | NaN   |
| 9928 | KIAA0042    | 0.00  | 0.00  | 0.00  | NaN   |
| 9929 | KIAA0063    | -0.09 | 0.00  | 0.05  | 0.37  |
| 9931 | HELZ        | 0.18  | 0.13  | 0.00  | 0.45  |
| 9933 | KIAA0020    | 0.00  | -0.13 | -0.10 | 0.65  |
| 9934 | GPR105      | 0.00  | 0.00  | 0.00  | NaN   |
| 9935 | MAFB        | 0.00  | -0.13 | 0.00  | -0.01 |

|       |            |       |       |       |       |
|-------|------------|-------|-------|-------|-------|
| 9936  | KIAA0022   | 0.00  | 0.00  | -0.10 | 0.17  |
| 9937  | DCLRE1A    | 0.09  | 0.00  | -0.05 | 0.39  |
| 9938  | KIAA0053   | 0.00  | 0.00  | 0.00  | NaN   |
| 9939  | RBM8A      | 0.00  | 0.00  | 0.05  | 0.47  |
| 9940  | DLEC1      | 0.00  | 0.25  | 0.00  | 0.71  |
| 9941  | ENDOGL1    | 0.00  | 0.00  | 0.00  | NaN   |
| 9942  | XYLB       | 0.00  | 0.00  | 0.00  | NaN   |
| 9943  | OSR1       | 0.50  | 0.50  | 0.50  | 0.33  |
| 9945  | GFPT2      | 0.00  | 0.13  | 0.00  | -0.05 |
| 9946  | CRYZL1     | 0.00  | 0.00  | 0.00  | NaN   |
| 9948  | WDR1       | 0.00  | -0.13 | -0.10 | 0.22  |
| 9950  | GOLGA5     | 0.00  | 0.00  | 0.00  | NaN   |
| 9953  | HS3ST3B1   | 0.00  | 0.00  | 0.00  | NaN   |
| 9955  | HS3ST3A1   | 0.00  | 0.00  | 0.00  | NaN   |
| 9956  | HS3ST2     | 0.00  | 0.00  | 0.00  | NaN   |
| 9957  | HS3ST1     | 0.00  | 0.00  | -0.05 | -0.05 |
| 9958  | USP15      | 0.00  | 0.00  | 0.00  | NaN   |
| 9961  | MVP        | 0.00  | 0.00  | 0.00  | NaN   |
| 9962  | SLC23A1    | 0.00  | 0.00  | 0.00  | NaN   |
| 9966  | TNFSF15    | 0.00  | -0.13 | 0.00  | -0.03 |
| 9967  | TRAP150    | 0.00  | 0.00  | 0.00  | NaN   |
| 9969  | TRAP240    | 0.27  | 0.13  | 0.00  | 0.62  |
| 9970  | NR1I3      | 0.00  | 0.00  | 0.00  | NaN   |
| 9971  | NR1H4      | 0.00  | 0.00  | 0.00  | NaN   |
| 9972  | NUP153     | 0.00  | 0.00  | 0.00  | NaN   |
| 9973  | CCS        | 0.00  | 0.00  | 0.05  | 0.23  |
| 9976  | CLECSF2    | -0.09 | 0.00  | 0.00  | -0.16 |
| 9978  | RBX1       | 0.00  | 0.00  | 0.05  | 0.37  |
| 9980  | C21orf5    | 0.00  | 0.00  | 0.00  | NaN   |
| 9982  | HBP17      | 0.00  | 0.00  | -0.10 | 0.16  |
| 9984  | P84        | 0.00  | 0.00  | 0.00  | NaN   |
| 9985  | REC8       | 0.00  | 0.00  | 0.00  | NaN   |
| 9986  | RCE1       | 0.09  | 0.00  | 0.05  | 0.46  |
| 9987  | HNRPDL     | 0.00  | 0.00  | 0.00  | NaN   |
| 9988  | DMTF1      | 0.00  | 0.00  | 0.00  | NaN   |
| 9989  | PPP4R1     | 0.00  | 0.00  | 0.00  | NaN   |
| 9990  | SLC12A6    | 0.00  | 0.00  | 0.00  | NaN   |
| 9991  | ROD1       | 0.00  | 0.00  | 0.00  | NaN   |
| 9992  | KCNE2      | 0.00  | 0.00  | 0.00  | NaN   |
| 9994  | CASP8AP2   | 0.00  | 0.00  | 0.00  | NaN   |
| 9997  | SCO2       | 0.00  | -0.25 | 0.00  | 0.44  |
| 10000 | AKT3       | 0.09  | 0.00  | 0.00  | -0.22 |
| 10001 | MED6       | 0.00  | 0.00  | 0.00  | NaN   |
| 10002 | NR2E3      | 0.00  | 0.00  | 0.00  | NaN   |
| 10003 | NAALAD2    | 0.00  | 0.00  | 0.00  | NaN   |
| 10004 | NAALADASEL | 0.00  | 0.00  | 0.00  | NaN   |
| 10005 | PTE1       | 0.00  | 0.00  | 0.00  | NaN   |

|       |         |       |       |       |       |
|-------|---------|-------|-------|-------|-------|
| 10006 | SSH3BP1 | -0.09 | 0.00  | 0.00  | 0.37  |
| 10007 | GNPI    | 0.00  | 0.00  | 0.00  | NaN   |
| 10010 | TANK    | 0.00  | 0.00  | -0.05 | 0.20  |
| 10014 | HDAC5   | 0.00  | -0.13 | 0.00  | -0.07 |
| 10015 | PDCD6IP | 0.00  | 0.00  | 0.00  | NaN   |
| 10016 | PDCD6   | 0.00  | 0.13  | 0.10  | 0.25  |
| 10017 | BCL2L10 | 0.18  | 0.00  | 0.00  | -0.09 |
| 10018 | BCL2L11 | 0.00  | 0.00  | 0.00  | NaN   |
| 10019 | LNK     | 0.00  | 0.00  | 0.00  | NaN   |
| 10020 | GNE     | -0.09 | 0.00  | 0.10  | 0.42  |
| 10021 | HCN4    | 0.00  | 0.00  | 0.00  | NaN   |
| 10022 | INSL5   | 0.00  | 0.00  | 0.00  | NaN   |
| 10023 | FRAT1   | 0.00  | 0.00  | -0.05 | 0.14  |
| 10024 | TROAP   | 0.00  | 0.00  | 0.00  | NaN   |
| 10025 | TRAP95  | 0.00  | 0.00  | -0.05 | 0.52  |
| 10026 | PIGK    | 0.00  | 0.00  | 0.00  | NaN   |
| 10036 | CHAF1A  | 0.18  | 0.00  | 0.00  | 0.10  |
| 10038 | ADPRTL2 | 0.00  | 0.00  | 0.00  | NaN   |
| 10039 | ADPRTL3 | -0.09 | 0.00  | -0.10 | 0.21  |
| 10040 | TOM1L1  | 0.00  | 0.00  | 0.00  | 0.43  |
| 10042 | HMG2L1  | 0.00  | 0.00  | 0.00  | NaN   |
| 10043 | TOM1    | 0.00  | 0.00  | 0.00  | NaN   |
| 10045 | SH2D3A  | 0.00  | 0.00  | 0.00  | NaN   |
| 10047 | CST8    | 0.00  | 0.00  | 0.00  | NaN   |
| 10048 | RANBP9  | 0.00  | 0.00  | 0.10  | 0.50  |
| 10049 | DNAJB6  | 0.00  | 0.00  | -0.05 | 0.24  |
| 10050 | SLC17A4 | 0.00  | 0.00  | 0.05  | 0.09  |
| 10051 | SMC4L1  | 0.00  | 0.00  | 0.00  | NaN   |
| 10052 | GJA7    | 0.00  | -0.13 | 0.00  | 0.11  |
| 10053 | AP1M2   | 0.00  | 0.13  | 0.05  | 0.16  |
| 10054 | UBA2    | 0.00  | 0.00  | 0.05  | 0.23  |
| 10057 | ABCC5   | 0.09  | 0.00  | 0.00  | 0.21  |
| 10058 | ABCB6   | 0.00  | 0.00  | 0.00  | NaN   |
| 10059 | DNM1L   | 0.00  | 0.00  | 0.00  | NaN   |
| 10060 | ABCC9   | 0.00  | 0.00  | 0.00  | NaN   |
| 10061 | ABCF2   | 0.00  | 0.00  | -0.05 | 0.21  |
| 10062 | NR1H3   | 0.00  | 0.00  | 0.00  | NaN   |
| 10063 | COX17   | 0.00  | 0.00  | 0.00  | NaN   |
| 10066 | SCAMP2  | 0.00  | 0.00  | 0.00  | NaN   |
| 10067 | SCAMP3  | 0.09  | 0.13  | 0.00  | 0.53  |
| 10068 | IL18BP  | 0.00  | -0.13 | 0.00  | -0.03 |
| 10069 | C21orf6 | 0.00  | 0.00  | 0.00  | NaN   |
| 10072 | DPP3    | 0.00  | 0.00  | 0.05  | 0.23  |
| 10073 | RNUT1   | 0.00  | 0.00  | 0.00  | NaN   |
| 10076 | PTPRU   | 0.00  | 0.00  | 0.00  | NaN   |
| 10077 | PHEMX   | 0.00  | -0.13 | 0.00  | -0.10 |
| 10078 | TSSC4   | 0.00  | -0.13 | 0.00  | 0.18  |

|       |              |       |       |       |       |
|-------|--------------|-------|-------|-------|-------|
| 10079 | ATP9A        | 0.09  | 0.13  | 0.00  | 0.35  |
| 10083 | PDZ-73/NY-CC | 0.00  | 0.00  | 0.00  | NaN   |
| 10086 | HHLA1        | 0.00  | -0.25 | 0.10  | -0.20 |
| 10087 | COL4A3BP     | 0.00  | 0.00  | 0.00  | NaN   |
| 10089 | KCNK7        | -0.09 | 0.00  | 0.05  | -0.19 |
| 10090 | UST          | 0.00  | 0.00  | 0.00  | NaN   |
| 10092 | ARPC5        | 0.00  | 0.00  | 0.00  | NaN   |
| 10093 | ARPC4        | 0.00  | 0.00  | 0.00  | NaN   |
| 10094 | ARPC3        | 0.00  | 0.00  | 0.00  | NaN   |
| 10095 | ARPC1B       | 0.18  | 0.00  | 0.00  | 0.58  |
| 10096 | ACTR3        | 0.00  | 0.00  | 0.00  | NaN   |
| 10097 | ACTR2        | 0.00  | 0.00  | 0.00  | NaN   |
| 10098 | TSPAN-5      | 0.00  | 0.00  | 0.00  | NaN   |
| 10099 | TSPAN-3      | 0.00  | 0.00  | 0.00  | NaN   |
| 10100 | TSPAN-2      | 0.18  | 0.00  | 0.10  | 0.08  |
| 10101 | NUBP2        | 0.00  | 0.00  | 0.00  | NaN   |
| 10102 | TSFM         | 0.00  | 0.00  | 0.00  | NaN   |
| 10103 | TSPAN-1      | 0.00  | 0.00  | 0.00  | NaN   |
| 10105 | PPIF         | 0.09  | 0.00  | 0.00  | 0.41  |
| 10106 | OS4          | 0.00  | 0.00  | 0.00  | NaN   |
| 10107 | TRIM10       | 0.00  | 0.00  | 0.00  | NaN   |
| 10109 | ARPC2        | 0.00  | 0.00  | 0.00  | NaN   |
| 10110 | SGK2         | 0.00  | -0.13 | 0.00  | 0.10  |
| 10111 | RAD50        | 0.00  | -0.13 | 0.00  | 0.14  |
| 10112 | RAB6KIFL     | 0.00  | 0.00  | 0.00  | NaN   |
| 10113 | PREB         | 0.09  | 0.00  | 0.05  | 0.55  |
| 10114 | HIPK3        | 0.00  | 0.00  | 0.05  | 0.58  |
| 10116 | FEM1B        | 0.00  | 0.00  | 0.00  | NaN   |
| 10120 | ACTR1B       | 0.00  | 0.00  | 0.00  | NaN   |
| 10121 | ACTR1A       | 0.00  | -0.13 | -0.05 | 0.49  |
| 10123 | ARL7         | 0.00  | 0.00  | 0.00  | NaN   |
| 10125 | RASGRP1      | 0.00  | 0.00  | -0.05 | 0.12  |
| 10126 | DNAL4        | -0.09 | 0.00  | 0.05  | 0.13  |
| 10127 | ZNF263       | 0.00  | 0.00  | 0.00  | NaN   |
| 10128 | LRPPRC       | 0.00  | 0.00  | 0.00  | NaN   |
| 10129 | 13CDNA73     | 0.00  | 0.00  | 0.00  | NaN   |
| 10130 | P5           | 0.00  | 0.00  | -0.05 | 0.37  |
| 10133 | OPTN         | 0.00  | 0.00  | 0.00  | NaN   |
| 10135 | PBEF         | 0.09  | 0.00  | 0.00  | 0.04  |
| 10136 | ELA3A        | -0.09 | 0.00  | -0.10 | 0.06  |
| 10137 | RBM12        | 0.00  | 0.00  | 0.00  | NaN   |
| 10138 | YAF2         | 0.00  | 0.13  | -0.05 | 0.43  |
| 10140 | TOB1         | 0.00  | 0.25  | 0.00  | 0.41  |
| 10141 | C4orf6       | 0.00  | -0.13 | -0.15 | 0.00  |
| 10142 | AKAP9        | 0.18  | 0.00  | 0.00  | 0.54  |
| 10144 | KIAA0914     | 0.00  | 0.00  | 0.00  | NaN   |
| 10146 | G3BP         | 0.00  | 0.00  | 0.00  | NaN   |

|       |           |       |       |       |       |
|-------|-----------|-------|-------|-------|-------|
| 10147 | KIAA0365  | 0.00  | 0.00  | 0.00  | NaN   |
| 10148 | EBI3      | 0.00  | 0.00  | 0.00  | NaN   |
| 10150 | MBLL      | -0.09 | -0.13 | -0.05 | 0.27  |
| 10151 | HNRPA3    | 0.00  | 0.00  | 0.00  | NaN   |
| 10152 | ABI-2     | 0.00  | 0.00  | 0.00  | NaN   |
| 10154 | PLXNC1    | 0.00  | 0.00  | 0.00  | NaN   |
| 10155 | TRIM28    | 0.00  | 0.13  | 0.00  | 0.58  |
| 10156 | CAPRI     | 0.18  | 0.00  | 0.00  | 0.04  |
| 10157 | AASS      | 0.00  | 0.13  | 0.00  | -0.01 |
| 10158 | DD96      | 0.00  | 0.00  | 0.00  | NaN   |
| 10160 | FARP1     | -0.09 | -0.13 | -0.10 | 0.28  |
| 10161 | P2Y5      | 0.00  | 0.13  | -0.05 | 0.24  |
| 10162 | C3F       | 0.00  | 0.00  | 0.00  | 0.52  |
| 10164 | CHST4     | 0.00  | 0.13  | 0.05  | 0.19  |
| 10165 | SLC25A13  | 0.18  | 0.00  | 0.00  | 0.53  |
| 10166 | SLC25A15  | 0.00  | 0.00  | -0.05 | 0.16  |
| 10168 | ZNF197    | -0.09 | 0.00  | -0.05 | -0.10 |
| 10169 | SERF2     | 0.00  | 0.00  | 0.00  | NaN   |
| 10170 | RDHL      | 0.00  | 0.00  | 0.00  | NaN   |
| 10171 | RNAC      | -0.09 | -0.13 | -0.10 | 0.64  |
| 10174 | SCAM-1    | -0.09 | -0.25 | -0.15 | 0.27  |
| 10175 | CNIL      | 0.00  | 0.00  | 0.05  | 0.28  |
| 10179 | RBM7      | -0.09 | 0.00  | 0.00  | 0.24  |
| 10180 | RBM6      | -0.09 | 0.00  | 0.00  | 0.59  |
| 10181 | RBM5      | -0.09 | 0.00  | -0.05 | 0.41  |
| 10184 | LHFPL2    | 0.00  | 0.00  | 0.00  | NaN   |
| 10186 | LHFP      | 0.00  | 0.00  | 0.00  | NaN   |
| 10188 | ACK1      | 0.18  | 0.00  | 0.00  | 0.55  |
| 10190 | APACD     | 0.00  | 0.00  | 0.00  | NaN   |
| 10193 | SBB103    | 0.00  | 0.00  | 0.00  | NaN   |
| 10195 | NOT56L    | 0.09  | 0.00  | 0.00  | 0.27  |
| 10196 | PRMT3     | 0.00  | 0.00  | 0.00  | NaN   |
| 10197 | PSME3     | 0.00  | -0.13 | 0.00  | 0.24  |
| 10198 | MPHOSPH9  | 0.00  | 0.00  | 0.00  | NaN   |
| 10199 | MPHOSPH10 | 0.00  | 0.00  | 0.00  | NaN   |
| 10200 | MPHOSPH6  | 0.00  | 0.50  | 0.00  | 0.25  |
| 10201 | NM23-H6   | -0.09 | 0.00  | -0.05 | 0.32  |
| 10202 | DHRS2     | 0.00  | 0.00  | 0.00  | NaN   |
| 10203 | CALCRL    | 0.00  | 0.00  | 0.00  | NaN   |
| 10204 | NTF2      | -0.09 | -0.13 | 0.00  | 0.48  |
| 10205 | EVA1      | 0.00  | 0.00  | 0.00  | NaN   |
| 10206 | RFP2      | 0.00  | 0.13  | 0.00  | 0.46  |
| 10207 | INADL     | 0.00  | 0.00  | 0.00  | NaN   |
| 10208 | D13S106E  | 0.00  | 0.00  | 0.05  | 0.21  |
| 10209 | SUI1      | 0.00  | 0.13  | 0.00  | 0.24  |
| 10210 | TP53BPL   | -0.09 | 0.00  | 0.00  | 0.70  |
| 10211 | FLOT1     | 0.00  | 0.00  | 0.00  | NaN   |

|       |         |       |       |       |       |
|-------|---------|-------|-------|-------|-------|
| 10212 | DDX39   | 0.00  | 0.00  | 0.00  | NaN   |
| 10213 | POH1    | 0.00  | 0.00  | -0.05 | 0.44  |
| 10215 | OLIG2   | 0.00  | 0.00  | 0.00  | NaN   |
| 10216 | PRG4    | 0.00  | 0.00  | 0.00  | NaN   |
| 10217 | HYA22   | 0.00  | 0.00  | 0.00  | NaN   |
| 10218 | CDT6    | 0.00  | 0.00  | 0.00  | NaN   |
| 10219 | KLRG1   | 0.50  | 0.00  | 0.50  | -0.09 |
| 10220 | GDF11   | 0.00  | 0.00  | 0.00  | NaN   |
| 10221 | C8FW    | 0.18  | 0.38  | 0.10  | 0.31  |
| 10223 | GPA33   | 0.00  | 0.00  | 0.00  | NaN   |
| 10224 | ZK1     | -0.09 | 0.00  | 0.00  | 0.01  |
| 10225 | TACTILE | 0.00  | 0.00  | 0.00  | NaN   |
| 10226 | TIP47   | 0.00  | 0.00  | 0.00  | NaN   |
| 10227 | TETTRAN | 0.00  | -0.13 | -0.15 | 0.35  |
| 10228 | STX6    | 0.00  | 0.00  | 0.00  | NaN   |
| 10229 | COQ7    | 0.00  | 0.00  | 0.00  | NaN   |
| 10230 | NBR2    | 0.00  | -0.13 | 0.00  | 0.08  |
| 10231 | DSCR1L1 | 0.00  | 0.00  | 0.00  | NaN   |
| 10232 | MSLN    | 0.00  | 0.00  | -0.05 | 0.08  |
| 10233 | B7      | -0.09 | 0.00  | 0.00  | 0.04  |
| 10234 | P37NB   | 0.09  | 0.00  | 0.00  | -0.13 |
| 10235 | RASGRP2 | 0.00  | 0.00  | 0.00  | NaN   |
| 10236 | HNRPR   | -0.09 | 0.00  | 0.00  | 0.32  |
| 10237 | UGTREL1 | 0.00  | 0.25  | 0.00  | 0.64  |
| 10238 | HAN11   | 0.27  | 0.13  | 0.00  | 0.38  |
| 10239 | AP3S2   | 0.00  | 0.00  | 0.00  | NaN   |
| 10240 | MRPS31  | 0.00  | 0.00  | -0.05 | 0.22  |
| 10241 | NDP52   | 0.00  | 0.38  | 0.00  | 0.70  |
| 10242 | KCNMB2  | 0.09  | 0.00  | 0.05  | 0.05  |
| 10243 | GPHN    | 0.00  | 0.00  | 0.05  | 0.20  |
| 10244 | RAB9P40 | 0.00  | 0.00  | 0.00  | NaN   |
| 10247 | UK114   | 0.00  | 0.00  | 0.00  | NaN   |
| 10248 | RPP20   | 0.18  | 0.00  | 0.00  | 0.37  |
| 10249 | GLYAT   | 0.00  | 0.00  | 0.00  | NaN   |
| 10250 | SRRM1   | -0.09 | 0.00  | 0.00  | 0.20  |
| 10252 | SPRY1   | 0.00  | 0.00  | 0.00  | NaN   |
| 10253 | SPRY2   | -0.09 | 0.00  | -0.05 | 0.22  |
| 10254 | STAM2   | 0.00  | 0.00  | 0.00  | NaN   |
| 10255 | HCGIX   | 0.00  | 0.00  | 0.00  | NaN   |
| 10256 | CNK1    | 0.00  | 0.00  | 0.00  | NaN   |
| 10257 | ABCC4   | -0.09 | 0.00  | -0.05 | 0.14  |
| 10260 | IRLB    | 0.00  | 0.00  | 0.00  | NaN   |
| 10261 | IGSF6   | 0.00  | 0.00  | 0.00  | NaN   |
| 10262 | SF3B4   | 0.00  | 0.00  | 0.05  | 0.36  |
| 10263 | DOC-1R  | 0.27  | 0.00  | 0.05  | 0.21  |
| 10265 | IRX5    | 0.09  | 0.00  | 0.00  | 0.33  |
| 10266 | RAMP2   | 0.00  | -0.13 | 0.00  | 0.08  |

|       |          |       |       |       |      |
|-------|----------|-------|-------|-------|------|
| 10267 | RAMP1    | 0.00  | 0.00  | -0.05 | 0.14 |
| 10268 | RAMP3    | 0.00  | 0.00  | 0.00  | NaN  |
| 10269 | ZMPSTE24 | 0.00  | 0.00  | 0.00  | NaN  |
| 10270 | AKAP8    | 0.00  | 0.00  | 0.00  | NaN  |
| 10272 | FSTL3    | 0.00  | 0.00  | -0.05 | 0.18 |
| 10273 | STUB1    | 0.00  | 0.00  | -0.05 | 0.20 |
| 10274 | STAG1    | 0.00  | 0.00  | 0.00  | NaN  |
| 10277 | UBE4B    | 0.00  | 0.00  | 0.00  | NaN  |
| 10278 | EFS2     | 0.00  | 0.00  | 0.00  | NaN  |
| 10279 | PRSS16   | 0.00  | 0.00  | 0.00  | NaN  |
| 10280 | SR-BP1   | -0.09 | 0.13  | 0.10  | 0.56 |
| 10281 | DSCR4    | 0.00  | 0.00  | 0.00  | NaN  |
| 10282 | BET1     | 0.18  | 0.00  | 0.00  | 0.50 |
| 10284 | SAP18    | 0.00  | 0.00  | -0.10 | 0.51 |
| 10285 | SPF30    | 0.00  | 0.00  | -0.05 | 0.09 |
| 10286 | BCAS2    | 0.18  | 0.00  | 0.10  | 0.67 |
| 10287 | RGS19    | 0.00  | 0.00  | 0.00  | NaN  |
| 10288 | LILRB2   | 1.00  | 0.00  | 0.50  | 0.09 |
| 10289 | GC20     | 0.00  | 0.00  | -0.05 | 0.16 |
| 10290 | APEG1    | 0.00  | 0.00  | 0.00  | NaN  |
| 10291 | SF3A1    | 0.00  | 0.00  | 0.00  | NaN  |
| 10293 | TRIP     | -0.09 | 0.00  | -0.05 | 0.07 |
| 10294 | DNAJA2   | -0.09 | 0.00  | -0.05 | 0.58 |
| 10295 | BCKDK    | 0.00  | 0.00  | 0.00  | NaN  |
| 10296 | MAEA     | -0.09 | -0.13 | -0.10 | 0.45 |
| 10297 | APCL     | 0.00  | 0.00  | 0.00  | NaN  |
| 10298 | PAK4     | 0.00  | 0.00  | 0.00  | NaN  |
| 10299 | TEB4     | 0.00  | 0.00  | 0.10  | 0.21 |
| 10300 | KATNB1   | 0.00  | 0.00  | 0.00  | 0.35 |
| 10301 | DLEU1    | 0.00  | 0.13  | 0.00  | 0.43 |
| 10302 | SNAPC5   | 0.00  | 0.00  | 0.00  | NaN  |
| 10307 | FE65L2   | 0.00  | 0.00  | 0.00  | NaN  |
| 10308 | ZNF267   | 0.00  | 0.00  | 0.00  | NaN  |
| 10309 | UNG2     | 0.00  | 0.00  | -0.05 | 0.12 |
| 10311 | DSCR3    | 0.00  | 0.00  | 0.00  | NaN  |
| 10312 | TCIRG1   | 0.18  | 0.00  | 0.05  | 0.30 |
| 10313 | RTN3     | 0.00  | 0.00  | 0.00  | NaN  |
| 10314 | LANCL1   | 0.00  | 0.00  | 0.00  | NaN  |
| 10316 | GPR66    | 0.00  | 0.00  | 0.00  | NaN  |
| 10317 | B3GALT5  | 0.00  | 0.00  | 0.00  | NaN  |
| 10318 | NAF1     | 0.00  | 0.00  | 0.00  | NaN  |
| 10319 | LAMC3    | 0.00  | 0.00  | 0.00  | NaN  |
| 10320 | ZNFN1A1  | 0.00  | 0.00  | 0.00  | NaN  |
| 10321 | SGP28    | 0.00  | 0.00  | 0.00  | NaN  |
| 10322 | RAI15    | 0.00  | 0.00  | 0.00  | NaN  |
| 10324 | SARCOSIN | 0.00  | 0.00  | 0.00  | NaN  |
| 10326 | SIRPB1   | 0.09  | 0.13  | 0.25  | 0.01 |

|       |           |       |       |       |       |
|-------|-----------|-------|-------|-------|-------|
| 10327 | AKR1A1    | 0.00  | 0.00  | 0.00  | NaN   |
| 10328 | NOC4      | 0.00  | 0.00  | -0.05 | 0.44  |
| 10329 | TMEM5     | 0.09  | 0.00  | 0.00  | 0.19  |
| 10330 | TMEM4     | 0.00  | 0.00  | 0.00  | NaN   |
| 10331 | B3GNT3    | 0.00  | 0.00  | 0.00  | NaN   |
| 10332 | CD209L    | 0.00  | 0.00  | 0.00  | NaN   |
| 10333 | TLR6      | 0.00  | 0.00  | 0.05  | -0.12 |
| 10336 | RNF3      | 0.00  | -0.13 | -0.10 | 0.12  |
| 10342 | TFG       | 0.00  | 0.00  | 0.00  | NaN   |
| 10343 | PKDREJ    | 0.00  | 0.00  | 0.00  | NaN   |
| 10346 | TRIM22    | 0.00  | -0.13 | -0.05 | 0.12  |
| 10347 | ABCA7     | 0.00  | 0.00  | 0.00  | NaN   |
| 10351 | ABCA8     | 0.18  | 0.13  | 0.00  | -0.17 |
| 10352 | WARS2     | 0.09  | 0.00  | 0.05  | 0.51  |
| 10360 | NPM3      | 0.00  | 0.50  | 0.00  | 0.12  |
| 10362 | HMG20B    | 0.00  | 0.00  | 0.00  | NaN   |
| 10363 | HMG20A    | 0.00  | 0.00  | 0.00  | NaN   |
| 10365 | KLF2      | 0.00  | 0.00  | 0.05  | -0.05 |
| 10367 | CBARA1    | 0.09  | 0.00  | 0.00  | 0.39  |
| 10368 | CACNG3    | 0.00  | 0.00  | 0.00  | NaN   |
| 10369 | CACNG2    | -0.09 | 0.00  | 0.00  | 0.04  |
| 10370 | CITED2    | 0.00  | 0.00  | 0.00  | NaN   |
| 10371 | SEMA3A    | 0.09  | 0.00  | 0.00  | -0.01 |
| 10376 | K-ALPHA-1 | 0.00  | 0.00  | 0.00  | NaN   |
| 10379 | ISGF3G    | 0.00  | 0.00  | 0.00  | NaN   |
| 10380 | BPNT1     | 0.09  | 0.00  | 0.05  | 0.42  |
| 10381 | TUBB4     | 0.00  | 0.00  | 0.00  | 0.01  |
| 10383 | TUBB2     | 0.00  | 0.00  | 0.00  | NaN   |
| 10384 | BTN3A3    | 0.00  | 0.00  | 0.00  | NaN   |
| 10385 | BTN2A2    | 0.00  | 0.00  | 0.00  | NaN   |
| 10388 | SYCP2     | 0.18  | 0.25  | 0.05  | 0.20  |
| 10390 | CEPT1     | 0.09  | 0.00  | 0.00  | 0.32  |
| 10391 | CORO2B    | 0.00  | 0.00  | 0.00  | NaN   |
| 10392 | CARD4     | 0.00  | 0.25  | 0.00  | 0.33  |
| 10393 | APC10     | 0.00  | 0.00  | 0.00  | NaN   |
| 10394 | PRG3      | 0.00  | 0.00  | 0.00  | NaN   |
| 10396 | ATP8A1    | 0.00  | 0.00  | 0.00  | NaN   |
| 10397 | NDRG1     | 0.00  | 0.00  | 0.05  | 0.15  |
| 10398 | MYL9      | 0.00  | -0.13 | 0.00  | 0.15  |
| 10399 | GNB2L1    | 0.00  | 0.13  | 0.00  | 0.59  |
| 10401 | PIAS3     | 0.00  | 0.00  | 0.05  | 0.17  |
| 10402 | ST3GALVI  | 0.00  | 0.00  | 0.00  | NaN   |
| 10403 | HEC       | 0.00  | 0.00  | 0.00  | NaN   |
| 10404 | PGCP      | 0.00  | -0.25 | 0.00  | 0.22  |
| 10406 | WFDC2     | 0.00  | 0.00  | 0.00  | NaN   |
| 10407 | SPAG11    | -0.27 | -0.25 | -0.15 | -0.02 |
| 10408 | NCYM      | 0.09  | 0.00  | -0.10 | 0.30  |



|       |           |       |       |       |       |
|-------|-----------|-------|-------|-------|-------|
| 10409 | BASP1     | 0.00  | 0.00  | 0.10  | 0.01  |
| 10410 | IFITM3    | -0.27 | -0.13 | -0.15 | 0.42  |
| 10411 | EPAC      | 0.00  | 0.00  | 0.00  | NaN   |
| 10412 | YR-29     | 0.00  | 0.00  | 0.00  | NaN   |
| 10413 | YAP1      | 0.00  | 0.13  | 0.00  | 0.44  |
| 10417 | SPON2     | 0.00  | -0.13 | -0.10 | 0.11  |
| 10418 | SPON1     | 0.00  | 0.00  | 0.00  | NaN   |
| 10419 | SKB1      | 0.00  | 0.00  | 0.00  | NaN   |
| 10420 | TESK2     | 0.00  | 0.00  | 0.00  | NaN   |
| 10421 | CD2BP2    | 0.00  | 0.00  | 0.00  | NaN   |
| 10422 | GDBR1     | 0.00  | 0.00  | 0.00  | NaN   |
| 10423 | CDIPT     | 0.00  | 0.00  | 0.00  | NaN   |
| 10424 | PGRMC2    | 0.00  | 0.00  | 0.00  | NaN   |
| 10425 | ARIH2     | -0.09 | 0.00  | -0.05 | 0.43  |
| 10426 | GCP3      | -0.09 | -0.13 | -0.05 | 0.41  |
| 10427 | SEC24B    | 0.00  | 0.00  | 0.00  | NaN   |
| 10428 | CFDP1     | 0.00  | -0.13 | 0.05  | 0.31  |
| 10432 | RBM14     | 0.00  | 0.00  | 0.05  | -0.04 |
| 10434 | LYPLA1    | 0.00  | 0.00  | 0.00  | NaN   |
| 10435 | CEP2      | -0.09 | 0.00  | 0.00  | -0.08 |
| 10436 | C2F       | 0.00  | 0.00  | 0.00  | 0.29  |
| 10437 | IFI30     | 0.00  | 0.00  | 0.00  | NaN   |
| 10438 | C1D       | 0.00  | 0.00  | 0.00  | NaN   |
| 10439 | OLFM1     | 0.00  | 0.00  | 0.00  | NaN   |
| 10440 | TIMM17A   | 0.00  | 0.00  | 0.00  | NaN   |
| 10443 | CG005     | 0.00  | 0.00  | 0.00  | NaN   |
| 10444 | ZYG       | 0.00  | 0.00  | 0.00  | NaN   |
| 10445 | MCRS1     | 0.00  | 0.00  | 0.00  | NaN   |
| 10446 | GAC1      | 0.00  | 0.13  | 0.00  | 0.30  |
| 10447 | GS3786    | 0.00  | 0.13  | 0.00  | 0.24  |
| 10449 | ACAA2     | -0.09 | -0.13 | -0.15 | 0.31  |
| 10450 | PPIE      | 0.00  | 0.00  | 0.00  | NaN   |
| 10451 | VAV3      | 0.09  | 0.00  | 0.00  | -0.09 |
| 10452 | TOMM40    | 0.09  | 0.00  | 0.00  | 0.16  |
| 10454 | MAP3K7IP1 | -0.09 | 0.00  | 0.05  | 0.20  |
| 10455 | PECI      | 0.00  | 0.00  | 0.00  | NaN   |
| 10456 | HAX1      | 0.09  | 0.13  | 0.00  | 0.39  |
| 10457 | GPNMB     | 0.00  | 0.13  | 0.00  | -0.13 |
| 10458 | BAIAP2    | 0.00  | 0.00  | 0.00  | NaN   |
| 10460 | TACC3     | 0.00  | -0.13 | -0.15 | 0.22  |
| 10461 | MERTK     | 0.00  | 0.00  | 0.00  | NaN   |
| 10462 | HML2      | 0.00  | 0.00  | 0.00  | NaN   |
| 10463 | C4orf1    | 0.00  | 0.00  | 0.05  | -0.39 |
| 10464 | PIBF1     | -0.09 | 0.13  | -0.15 | 0.35  |
| 10465 | PPIH      | 0.00  | 0.00  | 0.00  | NaN   |
| 10466 | COG5      | 0.09  | 0.00  | 0.00  | 0.11  |
| 10467 | CG1I      | 0.18  | 0.00  | 0.00  | 0.40  |

|       |          |       |       |       |       |
|-------|----------|-------|-------|-------|-------|
| 10468 | FST      | 0.00  | 0.00  | -0.05 | 0.13  |
| 10469 | TIMM44   | 0.00  | 0.00  | 0.00  | NaN   |
| 10471 | HKE2     | 0.09  | 0.00  | 0.00  | 0.15  |
| 10472 | ZNF238   | 0.00  | 0.13  | 0.00  | 0.48  |
| 10473 | HMG17L3  | 0.00  | 0.00  | 0.00  | NaN   |
| 10474 | TADA3L   | 0.00  | 0.00  | 0.00  | NaN   |
| 10475 | RNF15    | 0.00  | 0.00  | 0.05  | -0.08 |
| 10477 | UBE2E3   | 0.00  | 0.00  | 0.00  | NaN   |
| 10478 | SLC25A17 | 0.00  | 0.00  | 0.05  | 0.13  |
| 10480 | GA17     | 0.09  | 0.00  | 0.00  | 0.32  |
| 10481 | HOXB13   | 0.00  | 0.38  | 0.00  | 0.46  |
| 10482 | NXF1     | 0.00  | 0.00  | 0.00  | NaN   |
| 10483 | SEC23B   | 0.00  | 0.00  | 0.00  | NaN   |
| 10484 | SEC23A   | 0.00  | 0.00  | 0.00  | NaN   |
| 10485 | CROC4    | 0.00  | 0.13  | 0.00  | -0.03 |
| 10488 | CREB3    | -0.09 | 0.00  | 0.10  | 0.50  |
| 10489 | MUF1     | 0.00  | 0.00  | 0.00  | NaN   |
| 10490 | VTI2     | 0.00  | 0.00  | 0.00  | NaN   |
| 10491 | CRTAP    | 0.00  | 0.00  | 0.00  | NaN   |
| 10492 | NSAP1    | 0.00  | 0.00  | 0.00  | NaN   |
| 10494 | STK25    | 0.00  | 0.00  | -0.05 | 0.41  |
| 10497 | UNC13    | -0.09 | 0.13  | 0.10  | 0.62  |
| 10498 | CARM1    | 0.00  | 0.00  | -0.05 | 0.17  |
| 10499 | NCOA2    | 0.50  | 0.00  | 0.00  | 0.19  |
| 10500 | SEMA6C   | 0.00  | 0.00  | 0.05  | 0.16  |
| 10501 | SEMA6B   | 0.00  | 0.00  | 0.00  | NaN   |
| 10505 | SEMA4F   | 0.00  | 0.00  | 0.00  | NaN   |
| 10507 | SEMA4D   | 0.00  | 0.00  | 0.00  | NaN   |
| 10512 | SEMA3C   | 0.09  | 0.00  | 0.00  | 0.20  |
| 10513 | APPBP2   | 0.18  | 0.13  | 0.00  | 0.79  |
| 10514 | MYBBP1A  | 0.00  | 0.00  | 0.00  | NaN   |
| 10516 | FBLN5    | 0.00  | 0.13  | 0.00  | 0.24  |
| 10517 | C17orf1A | 0.09  | 0.00  | 0.00  | 0.23  |
| 10518 | KIP2     | 0.00  | 0.00  | 0.00  | NaN   |
| 10519 | CIB1     | 0.00  | 0.00  | 0.00  | NaN   |
| 10520 | ZNF211   | 0.00  | 0.13  | 0.00  | -0.03 |
| 10521 | DDX17    | -0.09 | 0.00  | 0.05  | 0.10  |
| 10522 | DEAF1    | -0.18 | -0.13 | 0.00  | 0.36  |
| 10523 | CHERP    | 0.00  | 0.00  | 0.00  | NaN   |
| 10524 | HTATIP   | 0.00  | 0.00  | 0.05  | 0.16  |
| 10525 | ORP150   | 0.00  | 0.00  | -0.05 | 0.29  |
| 10526 | RANBP8   | 0.00  | 0.00  | 0.00  | NaN   |
| 10527 | RANBP7   | 0.00  | 0.00  | 0.00  | NaN   |
| 10528 | NOL5A    | 0.00  | 0.00  | 0.05  | 0.17  |
| 10529 | NEBL     | -0.09 | 0.00  | 0.05  | 0.21  |
| 10531 | MP1      | 0.00  | 0.00  | 0.00  | NaN   |
| 10533 | GSA7     | 0.00  | 0.00  | 0.00  | NaN   |

|       |          |       |       |       |       |
|-------|----------|-------|-------|-------|-------|
| 10534 | SSSCA1   | -0.09 | 0.00  | 0.05  | 0.55  |
| 10535 | RNASEHI  | 0.00  | 0.00  | 0.00  | NaN   |
| 10536 | HSU47926 | -0.09 | 0.00  | 0.00  | 0.18  |
| 10537 | UBD      | 0.00  | 0.00  | 0.00  | NaN   |
| 10538 | BATF     | 0.00  | 0.00  | 0.00  | NaN   |
| 10539 | TXNL2    | 0.00  | 0.00  | -0.05 | 0.19  |
| 10540 | DCTN2    | 0.00  | 0.00  | 0.00  | NaN   |
| 10541 | ANP32B   | 0.00  | 0.00  | 0.00  | NaN   |
| 10542 | HBXIP    | 0.09  | 0.00  | 0.00  | 0.42  |
| 10544 | PROCR    | 0.00  | 0.13  | 0.00  | -0.14 |
| 10548 | TM9SF1   | 0.00  | 0.00  | 0.00  | NaN   |
| 10550 | JWA      | 0.00  | 0.00  | -0.05 | 0.45  |
| 10551 | AGR2     | 0.00  | 0.13  | 0.00  | 0.19  |
| 10552 | ARPC1A   | 0.18  | 0.00  | 0.00  | 0.60  |
| 10553 | HTATIP2  | 0.00  | 0.00  | 0.00  | NaN   |
| 10554 | AGPAT1   | 0.00  | 0.00  | 0.00  | NaN   |
| 10555 | AGPAT2   | 0.00  | 0.00  | 0.00  | NaN   |
| 10556 | RPP30    | 0.09  | 0.00  | 0.00  | 0.38  |
| 10557 | RPP38    | 0.00  | 0.00  | 0.00  | NaN   |
| 10558 | SPTLC1   | 0.00  | 0.00  | 0.00  | NaN   |
| 10559 | SLC35A1  | 0.00  | 0.00  | 0.00  | NaN   |
| 10560 | SLC19A2  | 0.00  | 0.00  | -0.05 | 0.28  |
| 10561 | IFI44    | 0.00  | 0.00  | 0.00  | NaN   |
| 10563 | SCYB13   | 0.00  | 0.00  | 0.00  | NaN   |
| 10564 | ARFGEF2  | 0.27  | 0.00  | 0.00  | 0.21  |
| 10565 | BIG1     | 0.00  | 0.00  | 0.00  | NaN   |
| 10566 | AKAP3    | -0.09 | 0.00  | 0.05  | 0.08  |
| 10567 | RABAC1   | 0.00  | 0.00  | -0.05 | 0.08  |
| 10568 | SLC34A2  | 0.00  | 0.00  | -0.05 | 0.05  |
| 10570 | DPYSL4   | 0.00  | 0.00  | -0.10 | 0.18  |
| 10572 | SIVA     | 0.00  | 0.00  | 0.00  | NaN   |
| 10573 | MAAT1    | 0.00  | 0.00  | -0.05 | 0.30  |
| 10574 | CCT7     | 0.00  | 0.00  | 0.00  | NaN   |
| 10575 | CCT4     | 0.00  | 0.00  | 0.00  | NaN   |
| 10576 | CCT2     | 0.09  | 0.00  | 0.00  | 0.22  |
| 10577 | NPC2     | 0.00  | 0.00  | 0.00  | NaN   |
| 10578 | GNLY     | 0.00  | 0.00  | -0.05 | 0.07  |
| 10579 | TACC2    | 0.00  | 0.00  | -0.05 | 0.16  |
| 10580 | SH3D5    | 0.00  | 0.00  | -0.05 | -0.07 |
| 10581 | IFITM2   | -0.27 | -0.13 | -0.05 | 0.21  |
| 10584 | COLEC10  | 0.00  | 0.25  | 0.10  | 0.26  |
| 10585 | POMT1    | 0.00  | 0.00  | 0.00  | NaN   |
| 10586 | MAB21L2  | 0.00  | 0.00  | 0.00  | -0.01 |
| 10587 | TXNRD2   | -0.09 | 0.00  | 0.00  | 0.15  |
| 10588 | MTHFS    | 0.00  | 0.00  | 0.00  | NaN   |
| 10589 | DRAP1    | -0.09 | 0.00  | 0.05  | 0.41  |
| 10590 | SCGN     | 0.00  | 0.00  | 0.05  | -0.02 |

|       |          |       |       |       |       |
|-------|----------|-------|-------|-------|-------|
| 10591 | RCL      | 0.00  | 0.00  | 0.00  | NaN   |
| 10592 | SMC2L1   | 0.00  | 0.00  | 0.00  | NaN   |
| 10594 | PRPF8    | 0.00  | -0.13 | 0.00  | 0.14  |
| 10595 | ERN2     | 0.00  | 0.00  | -0.05 | 0.25  |
| 10597 | SEDLP    | 0.09  | 0.13  | 0.00  | 0.32  |
| 10598 | C14orf3  | 0.00  | 0.00  | 0.00  | NaN   |
| 10599 | SLC21A6  | 0.00  | 0.00  | 0.00  | NaN   |
| 10600 | USP16    | 0.00  | 0.00  | 0.00  | NaN   |
| 10602 | CEP3     | 0.00  | 0.00  | 0.00  | NaN   |
| 10603 | APS      | 0.18  | 0.00  | 0.00  | 0.06  |
| 10605 | PAIP1    | 0.00  | 0.00  | 0.05  | 0.02  |
| 10606 | PAICS    | 0.00  | 0.00  | 0.00  | NaN   |
| 10607 | TBL3     | 0.00  | 0.00  | 0.00  | NaN   |
| 10608 | MAD4     | 0.00  | -0.13 | -0.20 | 0.31  |
| 10609 | SC65     | 0.00  | 0.13  | 0.00  | 0.36  |
| 10610 | STHM     | 0.00  | 0.13  | 0.00  | 0.43  |
| 10611 | LIM      | 0.00  | 0.00  | 0.00  | NaN   |
| 10612 | TRIM3    | 0.00  | -0.13 | 0.00  | 0.01  |
| 10613 | KEO4     | 0.00  | -0.13 | -0.05 | 0.27  |
| 10614 | HIS1     | 0.00  | 0.00  | 0.00  | 0.10  |
| 10615 | DEEPEST  | 0.00  | 0.38  | 0.00  | 0.42  |
| 10616 | C20orf18 | 0.00  | 0.00  | 0.05  | 0.34  |
| 10617 | AMSH     | 0.00  | 0.00  | 0.00  | NaN   |
| 10618 | TGOLN2   | 0.00  | 0.00  | 0.00  | NaN   |
| 10620 | DRIL2    | 0.00  | 0.00  | 0.00  | NaN   |
| 10621 | POLR3F   | 0.00  | 0.00  | 0.00  | NaN   |
| 10622 | RPC32    | 0.00  | 0.00  | 0.00  | NaN   |
| 10623 | RPC62    | 0.00  | 0.00  | 0.05  | 0.19  |
| 10625 | NS1-BP   | 0.00  | 0.00  | 0.00  | NaN   |
| 10626 | TRIM16   | 0.09  | 0.13  | 0.05  | -0.09 |
| 10627 | MLCB     | 0.09  | 0.00  | -0.05 | 0.62  |
| 10628 | TXNIP    | 0.00  | 0.00  | 0.05  | -0.17 |
| 10629 | TAF6L    | 0.00  | 0.00  | 0.00  | NaN   |
| 10630 | T1A-2    | 0.00  | 0.00  | 0.00  | NaN   |
| 10631 | OSF-2    | 0.00  | 0.00  | 0.00  | NaN   |
| 10632 | ATP5L    | 0.00  | 0.00  | 0.00  | NaN   |
| 10633 | RRP22    | -0.09 | 0.00  | 0.05  | -0.08 |
| 10634 | GAS2L1   | -0.09 | 0.00  | 0.05  | 0.32  |
| 10635 | PIR51    | -0.09 | 0.00  | 0.05  | 0.36  |
| 10636 | RGS14    | 0.00  | 0.13  | 0.00  | 0.29  |
| 10637 | LEFTB    | 0.09  | 0.00  | 0.00  | -0.20 |
| 10638 | SPHAR    | 0.09  | 0.00  | 0.00  | 0.30  |
| 10640 | SEC10L1  | 0.00  | 0.00  | 0.05  | 0.19  |
| 10641 | NPR2L    | -0.09 | 0.00  | -0.05 | 0.42  |
| 10643 | KOC1     | 0.00  | 0.50  | 0.00  | -0.12 |
| 10644 | IMP-2    | 0.09  | 0.00  | 0.05  | 0.06  |
| 10645 | CAMKK2   | 0.00  | -0.13 | 0.00  | 0.12  |

|       |           |       |       |       |       |
|-------|-----------|-------|-------|-------|-------|
| 10647 | SCGB1D2   | -0.09 | 0.00  | 0.00  | -0.50 |
| 10648 | SCGB1D1   | -0.09 | 0.00  | 0.00  | -0.20 |
| 10650 | HFL-EDDG1 | 0.00  | 0.00  | 0.00  | NaN   |
| 10651 | MTX2      | 0.00  | 0.00  | 0.00  | NaN   |
| 10652 | YKT6      | 0.00  | 0.00  | 0.00  | NaN   |
| 10653 | SPINT2    | 0.00  | 0.13  | 0.00  | 0.21  |
| 10654 | PMVK      | 0.09  | 0.13  | 0.00  | 0.39  |
| 10656 | KHDRBS3   | 0.00  | 0.00  | 0.10  | -0.09 |
| 10657 | KHDRBS1   | 0.00  | 0.00  | 0.00  | NaN   |
| 10658 | CUGBP1    | 0.00  | 0.00  | 0.00  | NaN   |
| 10659 | CUGBP2    | 0.00  | 0.00  | 0.00  | NaN   |
| 10660 | LBX1      | 0.00  | -0.13 | -0.05 | -0.06 |
| 10661 | KLF1      | 0.00  | 0.00  | 0.00  | NaN   |
| 10663 | TYMSTR    | -0.09 | 0.00  | -0.05 | -0.09 |
| 10664 | CTCF      | -0.09 | 0.00  | 0.00  | 0.35  |
| 10665 | C6orf10   | 0.00  | 0.00  | 0.00  | NaN   |
| 10666 | DNAM-1    | -0.09 | 0.00  | -0.10 | 0.11  |
| 10667 | FARS1     | 0.00  | 0.00  | 0.00  | NaN   |
| 10668 | CGR19     | 0.00  | 0.00  | 0.05  | 0.34  |
| 10669 | CGR11     | 0.09  | 0.00  | 0.05  | -0.03 |
| 10670 | RAGA      | 0.00  | -0.25 | -0.10 | 0.55  |
| 10671 | WS-3      | -0.09 | -0.25 | -0.05 | 0.55  |
| 10672 | GNA13     | 0.18  | 0.13  | 0.05  | 0.39  |
| 10675 | CSPG5     | -0.09 | 0.00  | -0.05 | 0.18  |
| 10677 | AVIL      | 0.00  | 0.00  | 0.00  | NaN   |
| 10678 | B3GNT1    | 0.00  | 0.00  | 0.50  | -0.27 |
| 10681 | GNB5      | 0.18  | 0.00  | 0.00  | 0.35  |
| 10683 | DLL3      | 0.09  | 0.00  | 0.00  | 0.04  |
| 10686 | CLDN16    | 0.00  | 0.00  | 0.05  | 0.07  |
| 10687 | PNMA2     | -0.09 | -0.25 | -0.05 | 0.15  |
| 10690 | FUT9      | -0.09 | 0.00  | 0.00  | 0.07  |
| 10691 | GMEB1     | 0.00  | 0.00  | 0.00  | NaN   |
| 10692 | RRH       | 0.00  | 0.00  | 0.00  | NaN   |
| 10693 | CCT6B     | 0.00  | -0.13 | 0.00  | 0.13  |
| 10694 | CCT8      | 0.00  | 0.00  | 0.00  | NaN   |
| 10695 | TNRC5     | 0.00  | 0.00  | 0.00  | NaN   |
| 10699 | PRSC      | 0.00  | 0.00  | 0.00  | NaN   |
| 10712 | C1orf2    | 0.09  | 0.13  | 0.00  | 0.40  |
| 10713 | SAD1      | 0.00  | 0.00  | -0.05 | 0.25  |
| 10714 | POLD3     | 0.09  | 0.00  | 0.00  | 0.45  |
| 10716 | TBR1      | 0.00  | 0.00  | -0.05 | -0.09 |
| 10721 | POLQ      | 0.00  | 0.00  | 0.00  | NaN   |
| 10723 | SLC12A7   | 0.00  | 0.13  | 0.10  | -0.03 |
| 10724 | MGEA5     | 0.00  | -0.13 | -0.05 | 0.25  |
| 10725 | NFAT5     | 0.00  | -0.13 | 0.05  | 0.36  |
| 10726 | NUDC      | -0.09 | -0.13 | 0.00  | 0.44  |
| 10728 | P23       | 0.00  | 0.00  | 0.00  | NaN   |

|       |          |       |       |       |       |
|-------|----------|-------|-------|-------|-------|
| 10730 | YME1L1   | -0.09 | 0.00  | 0.00  | 0.24  |
| 10732 | TCFL5    | 0.09  | 0.13  | 0.00  | 0.12  |
| 10733 | STK18    | 0.00  | 0.00  | 0.00  | NaN   |
| 10734 | STAG3    | 0.18  | 0.00  | 0.00  | 0.10  |
| 10736 | SIX2     | 0.00  | 0.00  | 0.00  | NaN   |
| 10738 | RFPL3    | 0.00  | 0.00  | 0.00  | NaN   |
| 10739 | RFPL2    | 0.00  | 0.00  | 0.00  | NaN   |
| 10740 | RFPL1S   | 0.00  | 0.00  | 0.00  | NaN   |
| 10741 | RBBP9    | 0.00  | 0.00  | 0.00  | NaN   |
| 10743 | RAI1     | 0.00  | 0.00  | 0.00  | NaN   |
| 10744 | PTTG2    | 0.00  | 0.00  | 0.00  | NaN   |
| 10745 | PHTF1    | 0.18  | 0.13  | 0.05  | 0.45  |
| 10747 | MASP2    | 0.00  | 0.00  | 0.00  | NaN   |
| 10748 | KLRA1    | -0.09 | 0.00  | 0.00  | 0.02  |
| 10749 | KIF1C    | 0.00  | 0.00  | 0.00  | NaN   |
| 10750 | GRAP     | 0.00  | 0.00  | 0.05  | 0.01  |
| 10753 | CAPN9    | 0.09  | 0.00  | 0.00  | 0.26  |
| 10755 | RGS19IP1 | 0.00  | 0.00  | 0.00  | NaN   |
| 10762 | NUP50    | 0.00  | 0.00  | 0.00  | NaN   |
| 10765 | PLU-1    | 0.09  | 0.13  | 0.05  | 0.45  |
| 10766 | TOB2     | 0.00  | 0.00  | 0.05  | -0.21 |
| 10767 | HBS1L    | 0.00  | 0.00  | 0.05  | 0.42  |
| 10768 | AHCYL1   | 0.09  | 0.00  | 0.05  | 0.28  |
| 10769 | SNK      | 0.00  | 0.00  | 0.00  | NaN   |
| 10771 | BS69     | 0.00  | 0.00  | 0.05  | 0.51  |
| 10772 | FUSIP1   | -0.09 | 0.00  | 0.00  | 0.15  |
| 10773 | ZID      | 0.00  | 0.00  | 0.00  | NaN   |
| 10775 | POP4     | 0.00  | 0.13  | 0.15  | 0.75  |
| 10776 | ARPP-19  | 0.09  | 0.00  | 0.00  | 0.50  |
| 10777 | ARPP-21  | 0.00  | 0.00  | 0.00  | NaN   |
| 10781 | ZNF266   | 0.00  | 0.13  | 0.00  | 0.41  |
| 10782 | ZNF274   | 0.00  | 0.13  | 0.05  | 0.28  |
| 10785 | WDR4     | 0.00  | 0.00  | 0.00  | NaN   |
| 10786 | SLC17A3  | 0.00  | 0.00  | 0.05  | -0.10 |
| 10787 | NCKAP1   | 0.00  | 0.00  | 0.00  | NaN   |
| 10788 | IQGAP2   | 0.00  | 0.00  | 0.00  | NaN   |
| 10791 | VAMP5    | 0.00  | 0.00  | -0.05 | 0.18  |
| 10793 | ZNF273   | 0.09  | 0.00  | 0.00  | -0.23 |
| 10794 | ZNF272   | 0.09  | 0.13  | 0.00  | 0.49  |
| 10795 | ZNF268   | 0.00  | 0.00  | 0.00  | NaN   |
| 10797 | MTHFD2   | 0.00  | 0.00  | 0.00  | NaN   |
| 10798 | OR511    | 0.09  | 0.00  | 0.00  | 0.13  |
| 10799 | RPP40    | 0.00  | 0.00  | 0.00  | NaN   |
| 10801 | MSF      | 0.00  | 0.50  | 0.00  | 0.34  |
| 10802 | SEC24A   | 0.00  | -0.13 | 0.00  | 0.24  |
| 10807 | SDCCAG3  | 0.00  | 0.00  | 0.00  | NaN   |
| 10808 | HSP105B  | 0.00  | 0.00  | 0.05  | 0.25  |

|       |           |       |       |       |       |
|-------|-----------|-------|-------|-------|-------|
| 10810 | WASF3     | 0.00  | -0.13 | -0.10 | -0.08 |
| 10814 | CPLX2     | 0.00  | 0.00  | 0.00  | NaN   |
| 10817 | SNT-2     | 0.00  | 0.00  | 0.05  | -0.04 |
| 10818 | SNT-1     | 0.09  | 0.00  | 0.00  | 0.35  |
| 10825 | NEU3      | 0.09  | 0.13  | 0.00  | 0.11  |
| 10826 | C5orf4    | 0.00  | 0.00  | 0.00  | NaN   |
| 10827 | C5orf3    | 0.00  | 0.00  | 0.00  | NaN   |
| 10840 | FTHFD     | 0.00  | 0.00  | 0.00  | NaN   |
| 10841 | FTCD      | 0.00  | 0.00  | 0.00  | NaN   |
| 10842 | GSBS      | 0.00  | 0.13  | 0.00  | 0.55  |
| 10844 | GCP2      | 0.00  | 0.00  | -0.10 | 0.47  |
| 10845 | CLPX      | 0.00  | 0.00  | 0.00  | NaN   |
| 10846 | PDE10A    | 0.00  | 0.00  | 0.00  | NaN   |
| 10847 | SRCAP     | 0.00  | 0.00  | 0.50  | 0.40  |
| 10848 | RAI       | 0.09  | 0.00  | 0.00  | 0.07  |
| 10849 | ASE-1     | 0.09  | 0.00  | 0.00  | 0.05  |
| 10850 | SCYA27    | -0.09 | 0.13  | 0.10  | -0.03 |
| 10855 | HPSE      | 0.00  | 0.00  | 0.00  | NaN   |
| 10856 | RUVBL2    | 0.09  | 0.00  | 0.00  | 0.17  |
| 10858 | CYP46     | 0.00  | 0.00  | 0.00  | NaN   |
| 10859 | LILRB1    | 0.09  | 0.00  | 0.00  | 0.04  |
| 10861 | SLC26A1   | 0.00  | -0.13 | -0.05 | 0.05  |
| 10863 | ADAM28    | 0.00  | -0.13 | -0.05 | -0.02 |
| 10864 | SLC22A7   | 0.00  | 0.00  | 0.00  | NaN   |
| 10865 | MRF-1     | 0.00  | 0.00  | 0.00  | NaN   |
| 10866 | P5-1      | 0.00  | 0.00  | 0.00  | NaN   |
| 10867 | NET-5     | 0.00  | 0.00  | 0.05  | 0.18  |
| 10868 | USP20     | 0.00  | 0.00  | 0.00  | NaN   |
| 10869 | USP19     | -0.09 | 0.00  | -0.05 | 0.32  |
| 10871 | CMRF35    | 0.00  | 0.13  | 0.00  | 0.04  |
| 10873 | ME3       | 0.00  | 0.00  | 0.00  | NaN   |
| 10874 | NMU       | 0.00  | 0.00  | 0.00  | NaN   |
| 10875 | FGL2      | -0.09 | 0.00  | 0.00  | 0.04  |
| 10876 | HE3-ALPHA | 0.00  | 0.00  | 0.00  | NaN   |
| 10877 | FHR-4     | 0.00  | 0.13  | 0.00  | -0.05 |
| 10879 | PROL3     | 0.00  | 0.00  | 0.00  | NaN   |
| 10880 | ACTL7B    | 0.00  | 0.00  | 0.05  | 0.61  |
| 10881 | ACTL7A    | 0.00  | 0.00  | 0.00  | NaN   |
| 10882 | CRF       | 0.00  | -0.13 | 0.00  | -0.04 |
| 10884 | MRPS30    | 0.00  | 0.00  | 0.10  | -0.17 |
| 10885 | WDR3      | 0.09  | 0.00  | 0.05  | 0.29  |
| 10891 | PPARGC1   | 0.00  | 0.00  | -0.05 | 0.05  |
| 10892 | MALT1     | -0.09 | 0.00  | -0.15 | 0.40  |
| 10893 | MMP24     | 0.00  | 0.50  | 0.00  | 0.17  |
| 10894 | XLKD1     | 0.00  | 0.00  | 0.00  | NaN   |
| 10895 | SPBPBP    | 0.00  | 0.00  | 0.00  | NaN   |
| 10896 | OCLM      | 0.00  | 0.00  | 0.00  | NaN   |

|       |             |       |       |       |       |
|-------|-------------|-------|-------|-------|-------|
| 10897 | 54TM        | 0.09  | 0.00  | 0.05  | 0.35  |
| 10898 | CPSF4       | 0.18  | 0.00  | 0.00  | 0.57  |
| 10899 | JTB         | 0.09  | 0.13  | 0.00  | 0.34  |
| 10900 | RPIP8       | 0.00  | -0.13 | 0.00  | 0.02  |
| 10901 | humNRDR     | 0.00  | 0.00  | 0.00  | NaN   |
| 10902 | SMAP        | 0.00  | 0.00  | 0.00  | NaN   |
| 10903 | CRA         | 0.00  | 0.00  | 0.05  | 0.46  |
| 10904 | BLCAP       | 0.00  | -0.13 | 0.00  | 0.29  |
| 10905 | MAN1A2      | 0.09  | 0.00  | 0.05  | 0.06  |
| 10906 | FLN29       | 0.00  | 0.00  | 0.00  | NaN   |
| 10907 | DIM1        | -0.09 | 0.00  | -0.25 | 0.67  |
| 10908 | NTE         | 0.00  | 0.00  | 0.00  | NaN   |
| 10911 | UTS2        | 0.00  | 0.00  | 0.00  | 0.00  |
| 10912 | GADD45G     | 0.00  | 0.00  | 0.00  | NaN   |
| 10913 | EDAR        | 0.00  | 0.00  | 0.00  | NaN   |
| 10915 | TCERG1      | 0.00  | 0.00  | 0.00  | NaN   |
| 10919 | BAT8        | 0.00  | 0.00  | 0.00  | NaN   |
| 10920 | COP9        | 0.00  | 0.00  | -0.05 | 0.41  |
| 10921 | RNPS1       | 0.00  | 0.00  | 0.00  | NaN   |
| 10922 | FASTK       | 0.00  | 0.00  | -0.05 | 0.48  |
| 10923 | PC4         | 0.00  | 0.00  | 0.15  | 0.34  |
| 10924 | ASM3A       | 0.00  | 0.00  | 0.00  | NaN   |
| 10926 | ASK         | 0.00  | 0.00  | 0.00  | NaN   |
| 10927 | SPIN        | 0.00  | 0.00  | 0.00  | NaN   |
| 10928 | RALBP1      | 0.00  | 0.00  | 0.00  | NaN   |
| 10929 | SRP46       | -0.09 | 0.13  | -0.05 | 0.35  |
| 10930 | APOBEC2     | 0.00  | 0.00  | 0.00  | NaN   |
| 10933 | MRG15       | 0.00  | 0.00  | 0.00  | NaN   |
| 10934 | MORF4       | 0.00  | 0.00  | -0.05 | -0.09 |
| 10935 | PRDX3       | 0.00  | 0.00  | -0.05 | 0.32  |
| 10936 | GPR75       | 0.09  | 0.00  | 0.00  | 0.09  |
| 10938 | EHD1        | 0.00  | 0.00  | 0.00  | NaN   |
| 10939 | AFG3L2      | 0.00  | 0.00  | 0.00  | NaN   |
| 10942 | PRSS21      | 0.00  | 0.00  | 0.00  | NaN   |
| 10944 | IMAGE145052 | 0.00  | 0.00  | 0.00  | NaN   |
| 10945 | KDELRL1     | 0.09  | 0.00  | 0.00  | 0.32  |
| 10946 | SF3A3       | 0.00  | 0.00  | 0.00  | NaN   |
| 10947 | AP3M2       | 0.36  | -0.13 | -0.05 | 0.59  |
| 10948 | MLN64       | 0.00  | 1.00  | 0.00  | 0.87  |
| 10949 | HNRPA0      | 0.00  | -0.13 | 0.00  | 0.16  |
| 10950 | BTG3        | 0.00  | -0.13 | 0.00  | 0.25  |
| 10951 | CBX1        | 0.00  | 0.00  | 0.00  | 0.41  |
| 10952 | SEC61B      | 0.00  | 0.00  | 0.00  | NaN   |
| 10953 | TOMM34      | 0.09  | 0.13  | 0.00  | 0.39  |
| 10954 | PDIR        | 0.00  | 0.00  | 0.00  | NaN   |
| 10955 | TDE1        | 0.09  | 0.13  | 0.00  | 0.59  |
| 10956 | OS-9        | 0.00  | 0.00  | 0.00  | NaN   |



|       |            |       |       |       |       |
|-------|------------|-------|-------|-------|-------|
| 10957 | PROL2      | 0.00  | 0.00  | 0.00  | NaN   |
| 10959 | RNP24      | 0.00  | 0.00  | 0.00  | NaN   |
| 10960 | C5orf8     | 0.00  | 0.13  | 0.00  | 0.56  |
| 10961 | C12orf8    | 0.00  | 0.13  | 0.00  | 0.34  |
| 10962 | AF1Q       | 0.00  | 0.00  | 0.05  | -0.03 |
| 10963 | STIP1      | 0.00  | 0.00  | 0.00  | NaN   |
| 10964 | C1orf29    | 0.00  | 0.00  | 0.00  | NaN   |
| 10965 | ZAP128     | 0.00  | 0.00  | 0.00  | 0.27  |
| 10966 | RAB40B     | 0.00  | 0.00  | 0.00  | NaN   |
| 10969 | EBNA1BP2   | 0.00  | 0.00  | 0.00  | NaN   |
| 10970 | CKAP4      | 0.00  | 0.00  | 0.00  | NaN   |
| 10971 | YWHAQ      | 0.00  | 0.00  | -0.05 | 0.47  |
| 10972 | TMP21      | 0.00  | 0.00  | 0.00  | NaN   |
| 10973 | RNAH       | 0.00  | 0.13  | 0.00  | -0.14 |
| 10974 | APM2       | 0.09  | 0.00  | -0.10 | 0.35  |
| 10975 | UQCR       | 0.00  | 0.00  | 0.00  | NaN   |
| 10979 | MIG2       | 0.00  | 0.00  | 0.05  | 0.30  |
| 10980 | MOV34-34KD | 0.18  | 0.00  | 0.00  | 0.52  |
| 10981 | RAB32      | 0.00  | -0.13 | 0.00  | 0.07  |
| 10982 | MAPRE2     | 0.00  | 0.00  | -0.20 | 0.35  |
| 10983 | CCNI       | 0.00  | 0.00  | 0.00  | NaN   |
| 10985 | GCN1L1     | 0.00  | -0.13 | 0.00  | 0.37  |
| 10987 | COPS5      | 0.00  | 0.00  | 0.00  | NaN   |
| 10988 | METAP2     | 0.00  | 0.13  | 0.00  | 0.26  |
| 10989 | IMMT       | 0.00  | 0.00  | -0.05 | 0.40  |
| 10990 | LILRB5     | 0.09  | 0.00  | 0.00  | 0.06  |
| 10991 | SLC38A3    | -0.09 | 0.00  | -0.10 | 0.20  |
| 10992 | SF3B2      | -0.09 | 0.00  | 0.05  | 0.43  |
| 10993 | SDS        | 0.00  | 0.00  | 0.00  | NaN   |
| 10994 | ILVBL      | 0.00  | 0.00  | 0.05  | 0.24  |
| 11004 | KNSL6      | 0.00  | 0.00  | 0.00  | NaN   |
| 11005 | SPINK5     | 0.00  | 0.00  | 0.00  | NaN   |
| 11006 | LILRB4     | 0.09  | 0.00  | 0.00  | 0.20  |
| 11007 | DIPA       | -0.09 | 0.00  | 0.05  | 0.42  |
| 11009 | IL24       | 0.00  | 0.13  | 0.00  | 0.31  |
| 11010 | RTVP1      | 0.00  | 0.00  | 0.00  | NaN   |
| 11011 | TLK2       | 0.27  | 0.13  | 0.00  | 0.74  |
| 11012 | KLK11      | 0.00  | 0.00  | 0.00  | NaN   |
| 11014 | KDEL2      | 0.00  | 0.00  | 0.10  | 0.38  |
| 11015 | KDEL3      | -0.09 | 0.00  | 0.05  | 0.27  |
| 11016 | ATF7       | 0.00  | 0.00  | 0.00  | NaN   |
| 11017 | RY1        | 0.00  | 0.00  | 0.00  | NaN   |
| 11018 | IL1RL1LG   | 0.00  | 0.00  | -0.05 | 0.05  |
| 11020 | RABL4      | -0.09 | 0.00  | 0.00  | 0.10  |
| 11021 | RAB35      | 0.00  | -0.13 | 0.00  | 0.13  |
| 11022 | TDRKH      | 0.00  | 0.13  | 0.05  | 0.49  |
| 11024 | LILRA1     | 0.09  | 0.00  | 0.00  | 0.03  |

|       |            |       |       |       |       |
|-------|------------|-------|-------|-------|-------|
| 11025 | LILRB3     | 0.09  | 0.00  | 0.00  | 0.11  |
| 11026 | LILRA3     | 0.09  | 0.13  | 0.05  | -0.27 |
| 11027 | LILRA2     | 0.09  | 0.00  | 0.00  | 0.04  |
| 11030 | RBPMS      | -0.09 | -0.25 | -0.05 | 0.13  |
| 11031 | RAB31      | 0.00  | 0.00  | 0.00  | NaN   |
| 11033 | CENTA1     | 0.00  | 0.00  | 0.00  | 0.35  |
| 11034 | DSTN       | 0.00  | 0.00  | 0.00  | NaN   |
| 11037 | SALF       | 0.00  | 0.00  | 0.00  | NaN   |
| 11041 | B3GNT6     | 0.27  | 0.00  | 0.00  | -0.11 |
| 11044 | POLS       | 0.00  | 0.00  | 0.50  | 0.68  |
| 11045 | UPK1A      | 0.00  | 0.00  | 0.00  | NaN   |
| 11046 | SQV7L      | 0.00  | 0.00  | 0.00  | NaN   |
| 11047 | ADRM1      | 0.09  | 0.13  | 0.00  | 0.37  |
| 11051 | CPSF5      | 0.00  | 0.00  | 0.00  | NaN   |
| 11052 | CPSF6      | 0.09  | 0.13  | 0.00  | 0.08  |
| 11054 | OGFR       | 0.09  | 0.13  | 0.00  | 0.13  |
| 11055 | ZPBP       | 0.00  | 0.00  | 0.00  | NaN   |
| 11056 | ROK1       | 0.00  | 0.00  | 0.00  | 0.35  |
| 11057 | LABH2      | 0.00  | 0.00  | -0.05 | 0.16  |
| 11059 | WWP1       | 0.18  | 0.25  | 0.00  | 0.41  |
| 11060 | WWP2       | 0.00  | -0.13 | 0.05  | 0.42  |
| 11061 | CHM-I      | 0.00  | 0.00  | 0.00  | NaN   |
| 11062 | PP35       | 0.09  | 0.00  | 0.00  | 0.54  |
| 11063 | SOX30      | 0.00  | 0.00  | 0.00  | NaN   |
| 11064 | CEP1       | 0.00  | 0.00  | -0.10 | 0.19  |
| 11065 | UBE2C      | 0.00  | 0.00  | 0.00  | NaN   |
| 11066 | U1SNRNPBP  | 0.00  | 0.00  | 0.00  | NaN   |
| 11067 | DEPP       | 0.00  | 0.00  | 0.00  | NaN   |
| 11068 | 101F6      | -0.09 | 0.00  | -0.05 | 0.22  |
| 11069 | CAMP-GEFII | 0.00  | 0.00  | -0.05 | 0.02  |
| 11070 | PL6        | -0.09 | 0.00  | -0.05 | 0.13  |
| 11072 | DUSP14     | 0.00  | 0.00  | 0.00  | 0.32  |
| 11073 | TOPBP1     | 0.00  | 0.00  | 0.00  | NaN   |
| 11074 | TRIM31     | 0.00  | 0.00  | 0.00  | NaN   |
| 11075 | STMN2      | 0.00  | 0.25  | 0.05  | -0.03 |
| 11076 | p25        | 0.00  | 0.13  | 0.10  | 0.18  |
| 11077 | HSF2BP     | 0.00  | 0.00  | 0.00  | NaN   |
| 11078 | HRIHFB2122 | -0.09 | 0.00  | 0.05  | 0.39  |
| 11079 | RER1       | 0.00  | 0.00  | 0.00  | NaN   |
| 11080 | DNAJB4     | 0.00  | 0.00  | 0.00  | NaN   |
| 11081 | KERA       | 0.00  | 0.00  | 0.00  | NaN   |
| 11082 | ESM1       | 0.00  | 0.00  | -0.05 | 0.08  |
| 11083 | DATF1      | 0.09  | 0.13  | 0.00  | 0.43  |
| 11085 | ADAM30     | 0.18  | 0.13  | 0.05  | -0.10 |
| 11086 | ADAM29     | 0.00  | 0.00  | -0.05 | 0.01  |
| 11092 | C9orf9     | 0.00  | 0.00  | 0.00  | NaN   |
| 11094 | C9orf7     | 0.00  | 0.00  | 0.00  | NaN   |

|       |         |       |       |       |       |
|-------|---------|-------|-------|-------|-------|
| 11095 | ADAMTS8 | -0.09 | 0.00  | -0.10 | -0.05 |
| 11096 | ADAMTS5 | 0.00  | 0.00  | 0.00  | NaN   |
| 11097 | NLP_1   | 0.00  | 0.13  | 0.00  | -0.29 |
| 11098 | SPUVE   | 0.00  | 0.00  | 0.00  | NaN   |
| 11099 | PTPN21  | 0.00  | 0.13  | 0.00  | 0.21  |
| 11100 | E1B-AP5 | 0.00  | 0.00  | -0.05 | 0.42  |
| 11102 | RPP14   | 0.00  | -0.13 | -0.10 | 0.24  |
| 11103 | HRB2    | 0.00  | 0.00  | 0.00  | NaN   |
| 11104 | KATNA1  | 0.00  | 0.00  | 0.00  | NaN   |
| 11107 | PRDM5   | 0.00  | 0.00  | 0.00  | NaN   |
| 11108 | PRDM4   | 0.00  | -0.13 | 0.00  | 0.12  |
| 11113 | CIT     | 0.00  | -0.13 | 0.00  | 0.25  |
| 11116 | FOP     | 0.00  | 0.00  | 0.00  | NaN   |
| 11117 | EMILIN  | 0.09  | 0.00  | 0.05  | -0.05 |
| 11118 | BTN3A2  | 0.00  | 0.00  | 0.00  | NaN   |
| 11119 | BTN3A1  | 0.00  | 0.00  | 0.00  | NaN   |
| 11120 | BTN2A1  | 0.00  | 0.00  | 0.00  | NaN   |
| 11122 | PTPRT   | 0.18  | -0.13 | 0.00  | 0.18  |
| 11123 | DSCR1L2 | 0.00  | 0.00  | 0.00  | 0.14  |
| 11124 | FAF1    | 0.00  | 0.00  | 0.00  | NaN   |
| 11126 | BY55    | 0.00  | 0.00  | 0.05  | 0.01  |
| 11127 | KIF3A   | 0.00  | -0.13 | 0.00  | 0.10  |
| 11129 | SWAP2   | 0.09  | 0.00  | 0.00  | 0.36  |
| 11130 | ZWINT   | 0.00  | 0.13  | 0.00  | 0.32  |
| 11131 | CAPN11  | 0.00  | 0.00  | 0.00  | NaN   |
| 11132 | CAPN10  | 0.00  | 0.00  | -0.05 | 0.32  |
| 11133 | KPTN    | 0.09  | 0.00  | 0.00  | -0.03 |
| 11135 | MSE55   | -0.09 | 0.00  | 0.05  | -0.17 |
| 11136 | SLC7A9  | 0.00  | 0.13  | 0.05  | -0.03 |
| 11137 | PWP1    | 0.00  | -0.13 | 0.00  | 0.24  |
| 11138 | VRP     | 0.00  | 0.00  | 0.00  | NaN   |
| 11140 | CDC37   | 0.00  | 0.00  | 0.05  | 0.42  |
| 11142 | PKIG    | 0.09  | 0.13  | 0.00  | 0.20  |
| 11143 | HBOA    | 0.00  | 0.25  | 0.00  | 0.68  |
| 11144 | DMC1    | -0.09 | 0.00  | 0.05  | 0.06  |
| 11145 | HRASLS3 | 0.00  | 0.00  | 0.00  | NaN   |
| 11146 | FAP48   | 0.00  | 0.00  | 0.05  | 0.59  |
| 11147 | HHLA3   | 0.00  | 0.00  | 0.00  | NaN   |
| 11148 | HHLA2   | 0.00  | 0.00  | 0.00  | NaN   |
| 11151 | CORO1A  | 0.00  | 0.00  | 0.00  | NaN   |
| 11153 | HYPE    | 0.00  | -0.13 | 0.00  | 0.07  |
| 11154 | AP4S1   | 0.00  | 0.00  | 0.00  | NaN   |
| 11155 | LDB3    | 0.09  | 0.00  | -0.05 | -0.02 |
| 11156 | PTP4A3  | 0.18  | 0.00  | 0.05  | 0.53  |
| 11157 | LSM6    | 0.00  | 0.00  | 0.00  | NaN   |
| 11158 | RABL2B  | 0.09  | -0.25 | -0.05 | 0.26  |
| 11159 | RABL2A  | 0.00  | 0.00  | 0.00  | NaN   |

|       |          |       |       |       |       |
|-------|----------|-------|-------|-------|-------|
| 11160 | C8orf2   | 0.55  | -0.13 | 0.00  | 0.72  |
| 11161 | C14orf1  | 0.00  | 0.00  | 0.00  | NaN   |
| 11162 | NUDT6    | 0.00  | 0.00  | 0.00  | NaN   |
| 11163 | NUDT4    | 0.00  | 0.13  | 0.00  | 0.35  |
| 11165 | NUDT3    | 0.00  | 0.00  | 0.00  | NaN   |
| 11166 | SOX21    | -0.09 | -0.13 | -0.05 | 0.26  |
| 11167 | FSTL1    | 0.00  | 0.00  | 0.00  | NaN   |
| 11168 | PSIP2    | 0.00  | -0.13 | 0.00  | 0.56  |
| 11169 | AND-1    | 0.00  | 0.00  | 0.05  | 0.22  |
| 11170 | TU3A     | 0.00  | -0.13 | -0.15 | 0.22  |
| 11171 | UNRIP    | 0.00  | 0.00  | 0.00  | NaN   |
| 11173 | ADAMTS7  | 0.00  | 0.00  | 0.00  | NaN   |
| 11174 | ADAMTS6  | 0.00  | 0.00  | 0.00  | NaN   |
| 11176 | BAZ2A    | 0.00  | 0.00  | 0.00  | NaN   |
| 11177 | BAZ1A    | 0.00  | 0.00  | 0.00  | NaN   |
| 11178 | LZTS1    | -0.09 | -0.38 | -0.10 | 0.11  |
| 11179 | ZNF277   | 0.09  | 0.00  | 0.00  | 0.12  |
| 11180 | WDR6     | -0.09 | 0.00  | -0.05 | 0.33  |
| 11181 | TREH     | 0.00  | 0.00  | 0.00  | NaN   |
| 11182 | SLC2A6   | 0.00  | 0.00  | 0.00  | NaN   |
| 11183 | MAP4K5   | 0.00  | 0.00  | 0.00  | NaN   |
| 11184 | MAP4K1   | 0.00  | 0.00  | 0.00  | NaN   |
| 11186 | RASSF1   | -0.09 | 0.00  | -0.05 | 0.05  |
| 11187 | PKP3     | -0.27 | -0.13 | -0.15 | 0.24  |
| 11188 | NISCH    | -0.09 | -0.25 | -0.10 | 0.55  |
| 11189 | TNRC4    | 0.00  | 0.13  | 0.05  | -0.27 |
| 11190 | CEP2     | 0.00  | -0.13 | 0.00  | 0.04  |
| 11193 | WBP4     | 0.00  | 0.00  | -0.05 | 0.31  |
| 11194 | ABCB8    | 0.00  | 0.00  | -0.05 | 0.12  |
| 11196 | P125     | 0.00  | 0.00  | -0.05 | 0.14  |
| 11197 | WIF1     | 0.09  | 0.00  | 0.00  | -0.14 |
| 11198 | FACTP140 | 0.00  | 0.00  | 0.00  | NaN   |
| 11199 | ANXA10   | 0.00  | 0.00  | -0.05 | 0.04  |
| 11200 | CHEK2    | -0.09 | 0.00  | 0.00  | 0.24  |
| 11201 | POLI     | -0.09 | 0.00  | -0.20 | 0.41  |
| 11202 | KLK8     | 0.00  | 0.00  | 0.00  | NaN   |
| 11211 | FZD10    | 0.00  | 0.00  | 0.00  | NaN   |
| 11212 | PROSC    | 0.55  | -0.13 | 0.00  | 0.81  |
| 11213 | IRAK-M   | 0.09  | 0.00  | 0.00  | -0.19 |
| 11215 | AKAP11   | 0.00  | 0.00  | -0.05 | 0.19  |
| 11216 | AKAP10   | 0.00  | -0.13 | 0.00  | 0.26  |
| 11217 | AKAP2    | 0.00  | 0.00  | 0.00  | NaN   |
| 11221 | DUSP10   | 0.09  | 0.00  | 0.00  | 0.25  |
| 11222 | MRPL3    | 0.00  | 0.00  | 0.00  | NaN   |
| 11223 | MSTP9    | 0.00  | 0.00  | -0.05 | 0.10  |
| 11224 | RPL35    | 0.00  | 0.00  | 0.00  | NaN   |
| 11226 | GALNT6   | 0.00  | 0.00  | 0.00  | NaN   |

|       |          |       |       |       |       |
|-------|----------|-------|-------|-------|-------|
| 11228 | C12orf2  | 0.00  | 0.00  | 0.00  | NaN   |
| 11231 | SEC63L   | 0.00  | 0.00  | 0.10  | 0.63  |
| 11232 | POLG2    | 0.27  | 0.13  | 0.00  | 0.59  |
| 11234 | AIBP63   | 0.00  | 0.00  | 0.00  | NaN   |
| 11235 | PDCD10   | 0.00  | 0.00  | 0.00  | NaN   |
| 11236 | TRC8     | 0.18  | 0.38  | -0.05 | 0.70  |
| 11237 | RNF24    | 0.00  | 0.00  | 0.00  | NaN   |
| 11245 | GPR      | 0.00  | 0.00  | -0.05 | -0.28 |
| 11247 | NXPH4    | 0.00  | 0.00  | 0.00  | NaN   |
| 11248 | NXPH3    | 0.00  | 0.25  | 0.00  | 0.27  |
| 11250 | GPR45    | 0.00  | 0.00  | 0.00  | NaN   |
| 11251 | GPR44    | 0.00  | 0.00  | 0.00  | NaN   |
| 11252 | PACSIN2  | 0.00  | 0.00  | 0.00  | NaN   |
| 11253 | MAN1B1   | 0.00  | 0.00  | 0.00  | NaN   |
| 11255 | HRH3     | 0.09  | 0.13  | 0.00  | 0.09  |
| 11257 | TP53TG1  | 0.00  | 0.00  | 0.00  | NaN   |
| 11258 | DCTN3    | -0.09 | 0.13  | 0.10  | 0.61  |
| 11259 | DOC1     | 0.00  | 0.00  | 0.00  | NaN   |
| 11260 | XPOT     | 0.09  | 0.00  | 0.00  | 0.45  |
| 11261 | CHP      | 0.00  | 0.00  | 0.00  | NaN   |
| 11262 | SP140    | 0.00  | 0.00  | 0.00  | NaN   |
| 11264 | PXMP4    | -0.09 | -0.13 | 0.00  | 0.13  |
| 11266 | DUSP12   | 0.00  | 0.00  | 0.00  | NaN   |
| 11267 | EAP30    | 0.00  | 0.38  | 0.00  | 0.68  |
| 11269 | DDX19    | -0.09 | -0.13 | 0.05  | 0.50  |
| 11272 | PROL4    | -0.09 | 0.00  | 0.00  | 0.19  |
| 11273 | A2LP     | 0.00  | 0.00  | 0.00  | NaN   |
| 11274 | USP18    | 0.00  | 0.00  | 0.00  | 0.12  |
| 11275 | KLHL2    | 0.00  | 0.00  | 0.00  | NaN   |
| 11277 | TREX1    | -0.09 | 0.00  | -0.05 | 0.01  |
| 11278 | KLF12    | -0.09 | 0.00  | -0.15 | 0.11  |
| 11281 | RPF-1    | 0.00  | 0.00  | 0.00  | NaN   |
| 11282 | MGAT4B   | 0.00  | 0.00  | 0.00  | NaN   |
| 11283 | CYP4F8   | 0.00  | 0.00  | 0.00  | NaN   |
| 11284 | PNKP     | 0.00  | 0.00  | 0.00  | NaN   |
| 11285 | B4GALT7  | 0.00  | 0.00  | 0.00  | NaN   |
| 11309 | SLC21A9  | 0.09  | 0.00  | 0.00  | 0.03  |
| 11311 | VPS45A   | 0.00  | 0.00  | 0.05  | 0.48  |
| 11313 | LYPLA2   | -0.09 | 0.00  | 0.00  | 0.06  |
| 11314 | CMRF-35H | 0.00  | 0.13  | 0.00  | 0.11  |
| 11315 | DJ-1     | 0.00  | 0.00  | 0.00  | NaN   |
| 11316 | COPE     | 0.00  | 0.13  | 0.00  | -0.23 |
| 11317 | RBPSUHL  | 0.00  | 0.00  | 0.00  | NaN   |
| 11318 | ADMR     | 0.00  | 0.00  | 0.00  | NaN   |
| 11320 | MGAT4A   | 0.00  | 0.00  | 0.00  | NaN   |
| 11321 | NTPBP    | 0.09  | 0.00  | 0.05  | 0.65  |
| 11322 | LAK-4P   | 0.00  | 0.13  | 0.00  | 0.21  |

|       |            |       |       |       |       |
|-------|------------|-------|-------|-------|-------|
| 11325 | RNAHP      | 0.27  | 0.13  | 0.00  | 0.53  |
| 11329 | STK38      | 0.00  | 0.00  | 0.00  | NaN   |
| 11330 | CTRC       | 0.00  | 0.00  | 0.00  | NaN   |
| 11331 | REA        | 0.00  | 0.00  | 0.00  | 0.54  |
| 11332 | BACH       | 0.00  | 0.00  | 0.00  | NaN   |
| 11333 | PDAP1      | 0.18  | 0.00  | 0.00  | 0.69  |
| 11334 | FUS1       | -0.09 | 0.00  | -0.05 | 0.20  |
| 11335 | CBX3       | 0.00  | 0.13  | 0.00  | -0.32 |
| 11336 | SEC6       | 0.00  | 0.13  | 0.10  | 0.60  |
| 11337 | GABARAP    | 0.00  | 0.00  | 0.00  | NaN   |
| 11338 | U2AF65     | 0.09  | 0.13  | 0.00  | 0.23  |
| 11339 | OIP5       | 0.00  | 0.00  | 0.00  | NaN   |
| 11341 | SCRG1      | 0.00  | 0.00  | -0.05 | 0.00  |
| 11342 | RNF13      | 0.00  | 0.00  | 0.05  | 0.24  |
| 11343 | MGLL       | 0.00  | 0.00  | 0.00  | NaN   |
| 11344 | PTK9L      | -0.09 | 0.00  | -0.10 | 0.19  |
| 11345 | GABARAPL2  | 0.00  | -0.13 | 0.05  | 0.36  |
| 11346 | KIAA1029   | 0.00  | 0.00  | 0.00  | NaN   |
| 22794 | MLN51      | 0.00  | 0.38  | 0.00  | 0.84  |
| 22795 | NID2       | 0.00  | 0.13  | 0.05  | 0.26  |
| 22796 | LDLC       | 0.09  | 0.00  | 0.00  | 0.48  |
| 22797 | TFEC       | 0.00  | 0.25  | 0.00  | -0.04 |
| 22798 | LAMB4      | 0.09  | 0.00  | 0.00  | 0.10  |
| 22800 | RRAS2      | 0.00  | 0.00  | 0.00  | NaN   |
| 22802 | CLCA4      | 0.00  | 0.00  | 0.10  | -0.04 |
| 22806 | ZNFN1A3    | 0.00  | 1.00  | 0.00  | 0.39  |
| 22807 | ZNFN1A2    | 0.00  | 0.00  | 0.00  | NaN   |
| 22808 | MRAS       | 0.00  | 0.00  | 0.00  | NaN   |
| 22809 | ATF5       | 0.00  | 0.00  | 0.00  | NaN   |
| 22821 | GAP1IP4BP  | -0.09 | -0.13 | -0.05 | 0.21  |
| 22822 | PHLDA1     | 0.00  | 0.00  | 0.00  | NaN   |
| 22823 | M96        | 0.00  | 0.00  | 0.05  | 0.51  |
| 22824 | APG-1      | 0.00  | 0.00  | 0.00  | NaN   |
| 22826 | DNAJC8     | 0.00  | 0.00  | 0.00  | NaN   |
| 22827 | SIAHBP1    | 0.18  | 0.00  | 0.10  | 0.49  |
| 22828 | KIAA1116   | 0.00  | 0.00  | 0.00  | NaN   |
| 22832 | KIAA1009   | 0.00  | 0.00  | 0.00  | NaN   |
| 22834 | KIAA0924   | 0.00  | 0.38  | 0.00  | 0.55  |
| 22835 | KIAA0961   | 0.00  | 0.13  | 0.00  | 0.15  |
| 22836 | KIAA0878   | 0.00  | 0.00  | 0.00  | NaN   |
| 22837 | KIAA0977   | 0.00  | 0.00  | 0.00  | NaN   |
| 22838 | KIAA1100   | 0.00  | 0.00  | 0.00  | NaN   |
| 22839 | KIAA0964   | 0.00  | 0.00  | 0.00  | NaN   |
| 22841 | Rab11-FIP2 | 0.00  | 0.00  | -0.05 | 0.21  |
| 22843 | KIAA1072   | 0.18  | 0.13  | 0.00  | 0.20  |
| 22844 | KIAA0967   | -0.09 | 0.00  | 0.05  | -0.13 |
| 22845 | KIAA1094   | 0.00  | 0.00  | 0.00  | NaN   |

|       |          |       |       |       |       |
|-------|----------|-------|-------|-------|-------|
| 22846 | KIAA1036 | 0.00  | 0.00  | 0.00  | NaN   |
| 22847 | KIAA1084 | 0.00  | 0.00  | 0.05  | -0.16 |
| 22848 | KIAA1048 | 0.00  | 0.00  | 0.00  | NaN   |
| 22849 | KIAA0940 | 0.00  | 0.00  | 0.00  | NaN   |
| 22850 | KIAA0863 | -0.09 | 0.00  | -0.25 | 0.53  |
| 22852 | KIAA1074 | -0.09 | 0.00  | 0.00  | 0.26  |
| 22853 | KIAA1079 | 0.18  | 0.00  | 0.00  | 0.27  |
| 22854 | KIAA0976 | 0.18  | 0.00  | 0.00  | 0.20  |
| 22856 | CHSY1    | 0.00  | 0.00  | 0.00  | NaN   |
| 22858 | ICK      | 0.00  | 0.00  | 0.00  | NaN   |
| 22859 | LEC2     | 0.00  | 0.00  | 0.00  | NaN   |
| 22861 | DEFCAP   | 0.00  | -0.13 | 0.00  | -0.02 |
| 22862 | KIAA0970 | 0.00  | 0.13  | 0.00  | 0.40  |
| 22863 | KIAA0831 | 0.00  | 0.00  | 0.05  | 0.15  |
| 22865 | KIAA0848 | 0.00  | 0.00  | 0.00  | NaN   |
| 22866 | CNK2     | 0.00  | -0.13 | 0.00  | -0.23 |
| 22868 | KIAA0971 | 0.00  | 0.00  | 0.00  | NaN   |
| 22869 | KIAA0972 | 0.00  | 0.00  | -0.05 | 0.25  |
| 22870 | KIAA1115 | 0.09  | 0.00  | 0.05  | -0.11 |
| 22871 | NLGN1    | 0.09  | 0.00  | 0.00  | -0.01 |
| 22872 | KIAA0905 | 0.00  | 0.00  | 0.00  | NaN   |
| 22873 | DZIP1    | -0.09 | 0.13  | -0.05 | 0.09  |
| 22874 | PEPP3    | 0.00  | 0.13  | 0.00  | 0.11  |
| 22875 | ENPP4    | -0.09 | 0.00  | -0.05 | 0.08  |
| 22877 | MONDOA   | 0.00  | -0.13 | 0.00  | 0.21  |
| 22878 | KIAA1012 | 0.00  | 0.00  | -0.10 | 0.55  |
| 22879 | KIAA0872 | 0.00  | 0.13  | 0.00  | 0.01  |
| 22880 | KIAA0852 | 0.00  | 0.00  | 0.00  | NaN   |
| 22881 | ANKRD6   | 0.00  | 0.00  | 0.00  | NaN   |
| 22882 | KIAA0854 | 0.18  | 0.25  | 0.05  | 0.44  |
| 22883 | CLSTN1   | 0.00  | 0.00  | 0.00  | NaN   |
| 22884 | KIAA0982 | 0.00  | 0.00  | 0.00  | NaN   |
| 22885 | KIAA0843 | 0.00  | 0.00  | 0.00  | NaN   |
| 22887 | KIAA1041 | 0.00  | 0.00  | 0.00  | NaN   |
| 22888 | UBCE7IP5 | 0.00  | 0.00  | 0.00  | NaN   |
| 22889 | KIAA0907 | 0.09  | 0.13  | 0.00  | 0.32  |
| 22890 | KIAA0997 | 0.09  | 0.00  | 0.00  | 0.38  |
| 22891 | KIAA0844 | 0.00  | 0.00  | 0.00  | NaN   |
| 22893 | KIAA0945 | 0.00  | 0.00  | 0.00  | NaN   |
| 22894 | DIS3     | -0.09 | 0.13  | -0.15 | 0.51  |
| 22895 | RPH3A    | 0.00  | 0.00  | 0.00  | NaN   |
| 22897 | KIAA1052 | -0.09 | 0.00  | 0.00  | 0.25  |
| 22898 | KIAA0870 | 0.18  | 0.00  | 0.05  | 0.31  |
| 22899 | ARHGEF15 | 0.00  | 0.00  | 0.00  | NaN   |
| 22900 | TUCAN    | 0.09  | 0.00  | 0.00  | 0.10  |
| 22901 | KIAA1001 | 0.18  | 0.13  | 0.00  | -0.10 |
| 22902 | KIAA0871 | 0.00  | 0.00  | 0.00  | NaN   |

|       |           |       |       |       |       |
|-------|-----------|-------|-------|-------|-------|
| 22903 | BTBD3     | 0.00  | 0.13  | 0.00  | -0.10 |
| 22904 | KIAA0963  | 0.00  | 0.13  | 0.00  | -0.13 |
| 22905 | EPN2      | 0.00  | 0.00  | 0.00  | NaN   |
| 22906 | KIAA1042  | 0.00  | 0.00  | -0.05 | 0.36  |
| 22907 | DDX30     | -0.09 | 0.00  | -0.05 | 0.43  |
| 22908 | SACM1L    | -0.09 | 0.00  | -0.05 | 0.42  |
| 22909 | KIAA1018  | 0.00  | 0.00  | 0.00  | NaN   |
| 22911 | KIAA0893  | 0.09  | 0.00  | 0.05  | 0.51  |
| 22913 | RALY      | 0.00  | -0.13 | 0.00  | 0.32  |
| 22914 | D12S2489E | -0.09 | 0.00  | 0.00  | 0.10  |
| 22915 | MMRN      | 0.00  | 0.00  | -0.05 | -0.09 |
| 22916 | NCBP2     | 0.18  | 0.00  | 0.00  | 0.62  |
| 22918 | C1QR1     | 0.00  | 0.00  | 0.00  | NaN   |
| 22919 | MAPRE1    | 0.00  | 0.00  | 0.00  | NaN   |
| 22920 | KIFAP3    | 0.00  | 0.00  | 0.00  | NaN   |
| 22921 | PILB      | -0.09 | 0.00  | 0.05  | 0.37  |
| 22924 | MAPRE3    | 0.50  | 0.00  | 0.50  | 0.26  |
| 22925 | PLA2R1    | 0.00  | 0.00  | -0.10 | 0.07  |
| 22926 | ATF6      | 0.00  | 0.00  | 0.00  | NaN   |
| 22927 | IHABP4    | 0.00  | 0.00  | -0.05 | -0.05 |
| 22928 | SPS2      | 0.00  | 0.00  | 0.00  | NaN   |
| 22929 | SPS       | 0.00  | 0.00  | 0.00  | NaN   |
| 22930 | RAB3GAP   | 0.00  | 0.00  | -0.05 | 0.19  |
| 22932 | POMZP3    | 0.00  | 0.00  | 0.00  | NaN   |
| 22933 | SIRT2     | 0.00  | 0.00  | 0.00  | NaN   |
| 22934 | RPIA      | 0.00  | 0.00  | -0.05 | 0.33  |
| 22936 | ELL2      | 0.00  | 0.00  | 0.00  | NaN   |
| 22938 | SNW1      | 0.00  | 0.00  | 0.00  | NaN   |
| 22941 | SHANK2    | 0.36  | 0.13  | 0.00  | 0.41  |
| 22943 | DKK1      | 0.00  | 0.00  | 0.00  | NaN   |
| 22944 | KIN       | 0.00  | 0.00  | -0.05 | 0.12  |
| 22948 | CCT5      | 0.00  | 0.00  | 0.10  | 0.35  |
| 22950 | SLC4A1AP  | 0.09  | 0.00  | 0.05  | 0.56  |
| 22953 | P2RX2     | 0.00  | 0.00  | 0.00  | NaN   |
| 22954 | TRIM32    | 0.00  | 0.00  | 0.00  | NaN   |
| 22955 | SCMH1     | 0.00  | 0.00  | 0.00  | NaN   |
| 22974 | C20orf1   | 0.00  | 0.00  | 0.05  | 0.30  |
| 22976 | PAXIP1L   | 0.00  | 0.00  | 0.00  | NaN   |
| 22977 | AKR7A3    | -0.09 | 0.00  | 0.00  | -0.06 |
| 22978 | NT5C2     | 0.00  | -0.13 | -0.05 | 0.19  |
| 22979 | KIAA0953  | 0.09  | 0.00  | 0.00  | 0.15  |
| 22981 | KIAA0980  | 0.00  | 0.00  | -0.05 | 0.25  |
| 22982 | KIAA0934  | 0.00  | 0.00  | 0.05  | -0.29 |
| 22984 | KIAA0185  | 0.00  | -0.13 | -0.05 | 0.30  |
| 22985 | ACN       | 0.00  | 0.00  | 0.00  | NaN   |
| 22986 | SORCS3    | 0.00  | -0.13 | -0.05 | -0.08 |
| 22987 | KIAA1054  | 0.00  | 0.00  | 0.00  | NaN   |



|       |           |       |       |       |       |
|-------|-----------|-------|-------|-------|-------|
| 22989 | KIAA1000  | 0.00  | 0.00  | 0.00  | NaN   |
| 22990 | KIAA0995  | 0.00  | 0.00  | 0.00  | NaN   |
| 22992 | FBXL11    | 0.45  | 0.00  | 0.05  | 0.60  |
| 22993 | KIAA0194  | 0.00  | 0.00  | 0.00  | NaN   |
| 22994 | KIAA1118  | 0.00  | 0.00  | 0.00  | NaN   |
| 22995 | KIAA0912  | 0.00  | 0.00  | 0.00  | NaN   |
| 22996 | KIAA0452  | 0.00  | 0.00  | 0.00  | NaN   |
| 22997 | KIAA1030  | -0.09 | 0.00  | -0.15 | -0.14 |
| 22998 | KIAA1102  | 0.00  | 0.00  | 0.00  | NaN   |
| 22999 | RAB3IP2   | 0.00  | 0.00  | 0.05  | 0.04  |
| 23001 | KIAA0993  | 0.00  | 0.00  | 0.00  | NaN   |
| 23005 | KIAA0596  | 0.00  | 0.00  | 0.00  | NaN   |
| 23007 | KIAA1069  | 0.00  | 0.00  | 0.00  | NaN   |
| 23008 | KIAA0265  | 0.00  | 0.25  | 0.05  | 0.44  |
| 23011 | RAB21     | 0.09  | 0.00  | 0.00  | 0.31  |
| 23012 | STK38L    | 0.00  | 0.00  | 0.00  | NaN   |
| 23013 | SHARP     | 0.00  | 0.00  | 0.00  | NaN   |
| 23014 | FBXO21    | 0.00  | -0.13 | 0.00  | 0.22  |
| 23015 | GOLGIN-67 | -0.18 | -0.13 | -0.10 | 0.24  |
| 23016 | KIAA0116  | -0.09 | 0.00  | -0.05 | 0.39  |
| 23017 | LFG       | 0.00  | 0.00  | 0.00  | NaN   |
| 23019 | KIAA1007  | 0.00  | 0.00  | 0.00  | NaN   |
| 23020 | KIAA0788  | 0.00  | 0.00  | 0.00  | NaN   |
| 23022 | KIAA0992  | 0.00  | 0.00  | -0.05 | 0.04  |
| 23023 | KIAA0779  | 0.00  | 0.00  | 0.00  | NaN   |
| 23024 | KIAA1095  | -0.09 | 0.00  | -0.05 | 0.14  |
| 23025 | KIAA1032  | -0.09 | 0.00  | 0.00  | 0.26  |
| 23026 | KIAA0865  | -0.09 | -0.13 | 0.00  | 0.02  |
| 23028 | KIAA0601  | -0.09 | 0.00  | 0.00  | 0.25  |
| 23029 | KIAA0117  | 0.09  | 0.13  | 0.00  | 0.38  |
| 23030 | KIAA0876  | 0.00  | 0.00  | 0.00  | NaN   |
| 23031 | KIAA0561  | 0.00  | 0.00  | 0.00  | NaN   |
| 23032 | VDU1      | 0.00  | 0.00  | 0.00  | NaN   |
| 23033 | KIAA1117  | 0.00  | 0.00  | 0.00  | NaN   |
| 23034 | KIAA1053  | 0.00  | 0.00  | 0.05  | 0.38  |
| 23035 | KIAA0931  | 0.00  | 0.00  | 0.05  | 0.44  |
| 23036 | KIAA0530  | 0.00  | 0.00  | 0.00  | NaN   |
| 23037 | PDZD2     | 0.00  | 0.00  | 0.15  | 0.02  |
| 23038 | KIAA1037  | -0.09 | -0.13 | 0.00  | -0.01 |
| 23039 | RANBP16   | -0.09 | -0.25 | -0.10 | 0.42  |
| 23040 | MYT1L     | 0.00  | 0.00  | 0.00  | NaN   |
| 23041 | KIAA1040  | 0.00  | 0.00  | 0.00  | NaN   |
| 23043 | KIAA0551  | 0.09  | 0.00  | 0.00  | 0.62  |
| 23046 | KIAA0449  | 0.00  | 0.00  | 0.00  | NaN   |
| 23047 | AS3       | 0.00  | 0.00  | 0.00  | NaN   |
| 23048 | FBP17     | 0.00  | 0.00  | 0.00  | NaN   |
| 23049 | SMG1      | 0.00  | 0.00  | 0.00  | NaN   |

|       |          |       |       |       |       |
|-------|----------|-------|-------|-------|-------|
| 23051 | TIX1     | 0.18  | -0.13 | 0.00  | 0.29  |
| 23052 | KIAA0830 | -0.09 | 0.13  | -0.05 | 0.46  |
| 23053 | KIAA0913 | 0.09  | 0.00  | 0.00  | 0.34  |
| 23054 | NCOA6    | 0.00  | 0.13  | 0.00  | 0.66  |
| 23057 | C1orf15  | 0.00  | 0.00  | 0.00  | NaN   |
| 23059 | KIAA0643 | 0.00  | 0.00  | 0.00  | NaN   |
| 23060 | KIAA0295 | 0.00  | 0.00  | -0.05 | 0.28  |
| 23061 | KIAA0676 | 0.00  | 0.00  | 0.00  | NaN   |
| 23062 | GGA2     | 0.00  | 0.00  | -0.05 | 0.33  |
| 23063 | KIAA0261 | 0.09  | 0.00  | -0.05 | 0.53  |
| 23064 | KIAA0625 | 0.00  | 0.00  | 0.00  | NaN   |
| 23065 | KIAA0090 | -0.09 | 0.00  | 0.00  | 0.29  |
| 23066 | TIP120B  | 0.00  | 0.00  | 0.00  | NaN   |
| 23067 | KIAA1076 | 0.00  | -0.13 | 0.00  | 0.12  |
| 23070 | KIAA0082 | 0.00  | 0.00  | 0.00  | NaN   |
| 23071 | ERp44    | 0.00  | 0.00  | 0.00  | NaN   |
| 23072 | KIAA0322 | 0.00  | 0.00  | 0.00  | NaN   |
| 23074 | KIAA0701 | 0.00  | 0.00  | 0.00  | NaN   |
| 23075 | SWAP70   | 0.00  | 0.00  | 0.00  | NaN   |
| 23076 | KIAA0179 | 0.00  | 0.00  | 0.00  | NaN   |
| 23077 | KIAA0916 | -0.09 | 0.13  | -0.10 | 0.42  |
| 23078 | KIAA0564 | 0.00  | 0.00  | -0.05 | 0.21  |
| 23080 | KIAA0241 | 0.00  | 0.13  | 0.00  | 0.10  |
| 23081 | GASC1    | -0.09 | -0.13 | -0.05 | 0.64  |
| 23082 | KIAA0595 | 0.00  | -0.13 | -0.05 | 0.16  |
| 23085 | ELKS     | 0.00  | 0.00  | 0.05  | 0.05  |
| 23086 | SLAC2-B  | 0.00  | 0.00  | 0.00  | NaN   |
| 23089 | PEG10    | 0.50  | 0.00  | 0.00  | -0.21 |
| 23090 | OAZ      | -0.09 | 0.00  | -0.05 | -0.13 |
| 23091 | KIAA0853 | 0.00  | 0.00  | -0.05 | 0.22  |
| 23092 | GRAF     | 0.00  | 0.00  | -0.05 | 0.27  |
| 23093 | KIAA0998 | 0.00  | 0.00  | 0.00  | NaN   |
| 23094 | KIAA0545 | 0.00  | 0.13  | 0.00  | 0.56  |
| 23095 | KIF1B    | 0.00  | 0.00  | 0.00  | NaN   |
| 23097 | KIAA1028 | 0.00  | 0.00  | 0.05  | 0.27  |
| 23098 | SARM     | 0.00  | 0.25  | 0.00  | 0.21  |
| 23099 | ZNF297B  | 0.09  | 0.00  | -0.05 | 0.63  |
| 23101 | KIAA0861 | 0.09  | 0.00  | 0.00  | 0.09  |
| 23102 | KIAA1055 | 0.00  | 0.00  | 0.00  | NaN   |
| 23105 | KIAA1061 | 0.00  | -0.13 | 0.00  | -0.18 |
| 23107 | MRPS27   | 0.00  | 0.00  | 0.00  | NaN   |
| 23109 | KIAA0749 | 0.00  | 0.00  | 0.00  | NaN   |
| 23112 | KIAA1093 | -0.09 | 0.00  | 0.05  | 0.10  |
| 23113 | KIAA0708 | 0.00  | 0.00  | 0.00  | NaN   |
| 23114 | NFASC    | 0.00  | 0.13  | 0.00  | -0.18 |
| 23116 | KIAA0423 | 0.00  | 0.00  | 0.00  | NaN   |
| 23117 | KIAA0220 | 0.00  | 0.00  | -0.05 | 0.18  |

|       |           |       |       |       |       |
|-------|-----------|-------|-------|-------|-------|
| 23118 | MAP3K7IP2 | 0.00  | 0.00  | 0.00  | NaN   |
| 23119 | HIC2      | 0.00  | 0.00  | 0.00  | NaN   |
| 23120 | ATP10B    | 0.00  | 0.00  | 0.00  | NaN   |
| 23122 | CLASP2    | 0.00  | 0.00  | 0.00  | NaN   |
| 23125 | KIAA0909  | 0.00  | 0.00  | 0.00  | NaN   |
| 23126 | KIAA0461  | 0.00  | 0.00  | 0.05  | 0.49  |
| 23127 | C1orf17   | 0.00  | 0.00  | 0.00  | NaN   |
| 23129 | KIAA0620  | 0.00  | 0.00  | 0.00  | NaN   |
| 23130 | KIAA0404  | 0.00  | 0.00  | 0.00  | NaN   |
| 23131 | KIAA0553  | 0.00  | -0.13 | 0.00  | 0.38  |
| 23132 | KIAA0809  | -0.09 | 0.00  | -0.10 | 0.48  |
| 23135 | KIAA0346  | 0.00  | 0.00  | 0.00  | NaN   |
| 23136 | EPB41L3   | 0.00  | 0.00  | 0.00  | NaN   |
| 23137 | KIAA0594  | 0.00  | 0.00  | 0.00  | NaN   |
| 23138 | N4BP3     | 0.18  | 0.00  | 0.00  | 0.48  |
| 23139 | MAST205   | 0.00  | 0.00  | 0.00  | NaN   |
| 23140 | KIAA0399  | 0.00  | 0.00  | 0.00  | NaN   |
| 23141 | KIAA0692  | 0.00  | 0.00  | 0.00  | NaN   |
| 23142 | KIAA0276  | 0.00  | 0.00  | 0.00  | NaN   |
| 23143 | KIAA1016  | 0.00  | 0.00  | 0.00  | NaN   |
| 23144 | KIAA0150  | 0.18  | 0.00  | 0.10  | 0.47  |
| 23145 | KIAA0543  | 0.00  | 0.00  | -0.05 | 0.27  |
| 23148 | KIAA0363  | 0.00  | 0.00  | 0.00  | NaN   |
| 23149 | KIAA0290  | -0.09 | 0.00  | 0.00  | -0.12 |
| 23150 | KIAA1013  | 0.00  | 0.00  | 0.00  | 0.08  |
| 23151 | KIAA0767  | 0.00  | -0.25 | 0.00  | 0.18  |
| 23152 | CIC       | 0.09  | 0.00  | -0.05 | 0.02  |
| 23154 | KIAA0607  | 0.00  | 0.00  | 0.00  | NaN   |
| 23155 | MCLC      | 0.09  | 0.00  | 0.05  | 0.49  |
| 23158 | KIAA0882  | 0.00  | 0.00  | 0.00  | NaN   |
| 23160 | KIAA0007  | 0.00  | 0.00  | 0.00  | NaN   |
| 23161 | SNX13     | 0.00  | 0.13  | 0.00  | -0.09 |
| 23162 | MAPK8IP3  | 0.00  | 0.00  | 0.00  | NaN   |
| 23163 | GGA3      | 0.00  | 0.13  | 0.00  | 0.46  |
| 23164 | KIAA0864  | 0.00  | 0.00  | 0.00  | NaN   |
| 23165 | KIAA0225  | 0.00  | 0.00  | 0.00  | NaN   |
| 23166 | STAB1     | -0.09 | -0.25 | -0.10 | 0.20  |
| 23167 | KIAA0143  | 0.00  | -0.25 | 0.10  | 0.66  |
| 23168 | KIAA0252  | 0.00  | 0.00  | 0.00  | NaN   |
| 23169 | UGTREL7   | 0.00  | 0.00  | 0.00  | NaN   |
| 23170 | KIAA0153  | 0.00  | 0.00  | 0.05  | 0.34  |
| 23171 | KIAA0089  | 0.00  | 0.00  | 0.00  | NaN   |
| 23172 | KIAA0157  | 0.00  | 0.00  | -0.05 | 0.35  |
| 23173 | METAP1    | 0.00  | 0.00  | 0.00  | NaN   |
| 23174 | BDG-29    | -0.09 | -0.13 | -0.05 | 0.26  |
| 23175 | LPIN1     | 0.00  | 0.00  | 0.00  | NaN   |
| 23176 | KIAA0202  | 0.00  | -0.13 | 0.00  | 0.27  |

|       |          |       |       |       |       |
|-------|----------|-------|-------|-------|-------|
| 23177 | KIAA0582 | 0.00  | 0.00  | 0.00  | NaN   |
| 23178 | PASK     | 0.00  | 0.00  | -0.05 | 0.31  |
| 23179 | RGL      | 0.00  | 0.00  | 0.00  | NaN   |
| 23180 | KIAA0084 | 0.00  | 0.00  | 0.05  | -0.13 |
| 23181 | KIAA0184 | 0.00  | 0.00  | 0.00  | NaN   |
| 23185 | KIAA0217 | 0.00  | 0.00  | 0.00  | NaN   |
| 23186 | RCOR     | 0.00  | 0.00  | 0.00  | NaN   |
| 23187 | KIAA0638 | 0.00  | 0.00  | 0.00  | NaN   |
| 23189 | KIAA0172 | 0.00  | -0.25 | -0.15 | 0.51  |
| 23190 | UBXD2    | 0.00  | 0.00  | -0.05 | 0.20  |
| 23191 | CYFIP1   | 0.00  | -0.13 | 0.05  | 0.28  |
| 23192 | Apg4B    | 0.00  | 0.00  | -0.05 | 0.35  |
| 23193 | G2AN     | 0.00  | 0.00  | 0.00  | NaN   |
| 23194 | FBXL7    | 0.00  | -0.25 | 0.15  | -0.09 |
| 23195 | MDN1     | 0.00  | 0.00  | 0.00  | NaN   |
| 23196 | C9orf10  | 0.00  | 0.00  | 0.05  | 0.05  |
| 23197 | KIAA0887 | 0.00  | 0.00  | 0.00  | NaN   |
| 23198 | KIAA0077 | 0.09  | 0.00  | 0.00  | 0.02  |
| 23199 | KIAA0182 | 0.00  | 0.00  | -0.05 | 0.27  |
| 23200 | ATP11B   | 0.09  | 0.00  | 0.00  | -0.20 |
| 23201 | KIAA0280 | 0.00  | 0.13  | 0.00  | 0.47  |
| 23203 | INPP5E   | 0.00  | 0.00  | 0.00  | NaN   |
| 23204 | ARL6IP   | 0.00  | 0.00  | 0.00  | NaN   |
| 23205 | BG1      | 0.00  | 0.00  | 0.00  | NaN   |
| 23207 | KIAA0842 | 0.00  | 0.00  | 0.00  | NaN   |
| 23208 | KIAA0080 | 0.50  | 0.50  | 0.50  | 0.01  |
| 23210 | PSR      | 0.00  | 0.13  | 0.00  | 0.51  |
| 23211 | C19orf7  | 0.09  | 0.00  | 0.00  | -0.12 |
| 23212 | RRS1     | 0.00  | 0.00  | 0.05  | 0.35  |
| 23213 | KIAA1077 | 0.00  | 0.00  | 0.00  | NaN   |
| 23214 | KIAA0370 | 0.00  | 0.00  | 0.00  | NaN   |
| 23215 | KIAA1096 | 0.00  | 0.00  | 0.00  | NaN   |
| 23216 | TBC1D1   | 0.00  | 0.00  | 0.00  | NaN   |
| 23217 | KIAA1086 | 0.00  | 0.00  | 0.00  | NaN   |
| 23218 | KIAA0540 | -0.09 | 0.00  | -0.05 | 0.29  |
| 23219 | KIAA0483 | 0.09  | 0.00  | 0.00  | 0.40  |
| 23220 | KIAA0937 | 0.00  | 0.00  | 0.00  | NaN   |
| 23221 | KIAA0717 | -0.09 | -0.25 | -0.15 | 0.23  |
| 23224 | SYNE-2   | 0.00  | 0.00  | 0.00  | NaN   |
| 23225 | KIAA0906 | 0.00  | 0.00  | -0.05 | 0.24  |
| 23228 | PLCL2    | 0.00  | 0.00  | 0.00  | NaN   |
| 23230 | CHAC     | 0.00  | 0.00  | -0.05 | 0.31  |
| 23231 | KIAA0746 | 0.00  | 0.00  | -0.05 | 0.19  |
| 23232 | KIAA0608 | 0.00  | 0.00  | 0.00  | NaN   |
| 23233 | SEC15B   | 0.00  | 0.00  | 0.00  | NaN   |
| 23234 | JDD1     | 0.09  | 0.00  | 0.00  | 0.45  |
| 23235 | KIAA0781 | 0.00  | 0.00  | 0.00  | NaN   |

|       |          |       |       |       |       |
|-------|----------|-------|-------|-------|-------|
| 23236 | PLCB1    | 0.00  | 0.00  | 0.05  | -0.08 |
| 23239 | SCOP     | -0.09 | 0.00  | -0.15 | 0.36  |
| 23240 | KIAA0922 | 0.00  | 0.00  | -0.05 | 0.39  |
| 23241 | KIAA0602 | 0.00  | 0.00  | 0.00  | NaN   |
| 23242 | KIAA0633 | 0.00  | 0.00  | 0.00  | NaN   |
| 23243 | KIAA0379 | 0.00  | 0.00  | 0.05  | -0.02 |
| 23244 | KIAA0648 | 0.00  | 0.00  | 0.00  | NaN   |
| 23245 | ASTN2    | 0.00  | 0.00  | 0.00  | NaN   |
| 23246 | BOP1     | 0.18  | 0.00  | 0.10  | 0.20  |
| 23247 | KIAA0556 | 0.00  | 0.00  | 0.00  | NaN   |
| 23250 | ATP11A   | -0.09 | -0.13 | -0.05 | 0.27  |
| 23253 | KIAA0874 | 0.00  | 0.00  | 0.00  | NaN   |
| 23255 | KIAA0802 | 0.00  | 0.00  | 0.00  | NaN   |
| 23256 | RA410    | 0.00  | 0.00  | 0.00  | NaN   |
| 23258 | KIAA1091 | 0.00  | 0.00  | 0.00  | NaN   |
| 23259 | KIAA0725 | 0.45  | -0.13 | -0.05 | 0.54  |
| 23262 | KIAA0433 | 0.00  | 0.00  | 0.00  | NaN   |
| 23263 | MCF2L    | -0.09 | -0.13 | -0.05 | 0.14  |
| 23264 | KIAA1031 | 0.00  | 0.00  | 0.05  | 0.26  |
| 23265 | KIAA1067 | 0.00  | 0.50  | 0.00  | 0.38  |
| 23266 | LPHH1    | 0.00  | 0.00  | 0.05  | 0.36  |
| 23268 | KIAA1010 | 0.00  | -0.13 | -0.05 | 0.12  |
| 23271 | KIAA1078 | 0.00  | 0.00  | 0.00  | NaN   |
| 23272 | RAP140   | 0.00  | 0.00  | -0.10 | 0.23  |
| 23274 | KIAA0350 | 0.00  | 0.00  | 0.00  | NaN   |
| 23275 | C21orf80 | 0.00  | 0.00  | 0.00  | NaN   |
| 23276 | KIAA0795 | -0.09 | 0.00  | -0.05 | 0.46  |
| 23277 | KIAA0664 | 0.00  | 0.00  | 0.00  | NaN   |
| 23279 | NUP160   | 0.00  | 0.00  | 0.05  | 0.55  |
| 23281 | KIAA0774 | 0.00  | 0.00  | -0.05 | -0.01 |
| 23283 | CSTF2T   | 0.00  | 0.00  | 0.00  | NaN   |
| 23284 | LEC3     | 0.00  | 0.00  | 0.00  | NaN   |
| 23285 | KIAA1107 | 0.00  | 0.00  | 0.05  | 0.34  |
| 23286 | KIAA0869 | 0.00  | 0.00  | 0.00  | NaN   |
| 23287 | AGTPBP1  | 0.00  | 0.00  | 0.00  | NaN   |
| 23288 | KIAA1023 | 0.00  | 0.13  | 0.10  | 0.22  |
| 23291 | FBXW1B   | 0.00  | 0.00  | 0.00  | NaN   |
| 23293 | C17orf31 | 0.00  | -0.13 | 0.00  | 0.10  |
| 23294 | KIAA0229 | 0.00  | 0.00  | 0.00  | NaN   |
| 23295 | KIAA0544 | 0.00  | 0.00  | -0.05 | 0.62  |
| 23299 | BICD2    | 0.00  | 0.00  | 0.00  | NaN   |
| 23300 | KIAA0431 | 0.00  | 0.00  | -0.05 | 0.29  |
| 23301 | KIAA0903 | 0.00  | 0.00  | 0.00  | NaN   |
| 23302 | KIAA0523 | 0.00  | 0.00  | 0.00  | NaN   |
| 23303 | KIF13B   | -0.09 | -0.25 | -0.05 | 0.11  |
| 23304 | KIAA0349 | 0.00  | 0.00  | 0.00  | NaN   |
| 23305 | FACL6    | 0.00  | -0.13 | 0.00  | -0.28 |

|       |          |       |       |       |       |
|-------|----------|-------|-------|-------|-------|
| 23306 | KIAA0286 | 0.00  | 0.00  | 0.00  | NaN   |
| 23307 | KIAA0674 | 0.00  | 0.00  | 0.00  | NaN   |
| 23308 | B7H2     | 0.00  | 0.00  | 0.00  | NaN   |
| 23309 | KIAA0700 | 0.00  | 0.00  | 0.00  | NaN   |
| 23310 | KIAA0056 | -0.09 | 0.00  | -0.15 | 0.28  |
| 23312 | RC3      | 0.18  | 0.00  | 0.00  | 0.47  |
| 23313 | KIAA0930 | 0.00  | 0.00  | 0.00  | NaN   |
| 23314 | KIAA1034 | 0.00  | 0.00  | 0.00  | NaN   |
| 23316 | KIAA0293 | 0.00  | 0.00  | 0.00  | NaN   |
| 23317 | KIAA0678 | 0.00  | 0.00  | 0.00  | NaN   |
| 23318 | KIAA0191 | 0.00  | 0.00  | 0.00  | NaN   |
| 23321 | TRIM2    | 0.00  | 0.00  | -0.05 | 0.27  |
| 23322 | KIAA1005 | 0.09  | 0.00  | 0.00  | 0.34  |
| 23325 | KIAA1033 | 0.00  | 0.00  | 0.00  | NaN   |
| 23326 | USP22    | 0.00  | -0.13 | 0.00  | 0.37  |
| 23327 | NEDD4L   | -0.09 | 0.00  | -0.25 | 0.14  |
| 23328 | KIAA0790 | 0.00  | 0.00  | 0.00  | NaN   |
| 23331 | KIAA1043 | 0.00  | 0.00  | 0.00  | NaN   |
| 23332 | CLASP1   | 0.00  | 0.00  | 0.00  | NaN   |
| 23333 | KIAA0877 | 0.00  | 0.00  | 0.00  | NaN   |
| 23334 | KIAA0467 | 0.00  | 0.00  | 0.00  | NaN   |
| 23335 | WDR7     | -0.09 | 0.13  | -0.20 | 0.33  |
| 23336 | DMN      | 0.00  | 0.00  | 0.00  | NaN   |
| 23338 | KIAA0239 | 0.00  | -0.13 | 0.00  | 0.34  |
| 23339 | VPS39    | 0.00  | 0.00  | 0.00  | NaN   |
| 23341 | KIAA0962 | 0.00  | 0.00  | 0.00  | NaN   |
| 23344 | KIAA0747 | 0.00  | 0.00  | 0.00  | NaN   |
| 23345 | SYNE-1   | 0.00  | 0.00  | 0.00  | NaN   |
| 23347 | KIAA0650 | 0.00  | 0.00  | -0.05 | 0.32  |
| 23348 | KIAA1058 | -0.09 | -0.13 | -0.05 | 0.17  |
| 23349 | KIAA1045 | -0.09 | 0.00  | 0.10  | -0.06 |
| 23350 | KIAA0332 | 0.00  | 0.00  | -0.05 | 0.33  |
| 23351 | KIAA0323 | 0.00  | 0.00  | 0.00  | NaN   |
| 23352 | RBAF600  | -0.09 | 0.00  | 0.00  | 0.03  |
| 23353 | KIAA0810 | 0.00  | 0.00  | 0.00  | 0.32  |
| 23354 | KIAA0841 | 0.00  | 0.00  | 0.00  | NaN   |
| 23355 | KIAA0804 | 0.09  | 0.00  | 0.00  | 0.41  |
| 23357 | KIAA0759 | 0.00  | 0.00  | 0.00  | NaN   |
| 23358 | USP24    | 0.00  | 0.00  | 0.00  | NaN   |
| 23359 | KIAA0574 | 0.00  | -0.13 | 0.00  | 0.06  |
| 23360 | KIAA1014 | 0.00  | 0.00  | 0.05  | 0.20  |
| 23361 | KIAA0326 | 0.00  | 0.00  | 0.00  | NaN   |
| 23362 | KIAA0942 | -0.09 | -0.13 | -0.05 | 0.18  |
| 23363 | KIAA0657 | 0.00  | 0.00  | 0.00  | NaN   |
| 23365 | ARHGEF12 | -0.09 | 0.00  | -0.10 | 0.50  |
| 23366 | KIAA0895 | 0.00  | 0.00  | 0.00  | NaN   |
| 23367 | KIAA0731 | 0.00  | 0.00  | 0.00  | NaN   |

|       |             |       |       |       |       |
|-------|-------------|-------|-------|-------|-------|
| 23369 | PUM2        | 0.09  | 0.00  | -0.05 | 0.54  |
| 23370 | P114-RHO-GE | 0.00  | 0.00  | 0.00  | NaN   |
| 23371 | KIAA1075    | 0.00  | 0.00  | 0.00  | NaN   |
| 23373 | KIAA0616    | 0.00  | 0.00  | 0.00  | NaN   |
| 23378 | KIAA0409    | 0.00  | -0.13 | 0.00  | 0.39  |
| 23379 | KIAA0947    | 0.00  | 0.00  | 0.05  | 0.26  |
| 23381 | KIAA1089    | 0.00  | 0.13  | 0.00  | 0.54  |
| 23382 | KIAA0828    | 0.00  | 0.00  | 0.00  | NaN   |
| 23383 | KIAA0892    | 0.00  | 0.00  | 0.00  | NaN   |
| 23384 | KIAA0376    | 0.00  | 0.00  | 0.00  | NaN   |
| 23385 | NCSTN       | 0.00  | 0.00  | 0.00  | NaN   |
| 23386 | KIAA1068    | 0.09  | 0.00  | 0.00  | 0.28  |
| 23387 | KIAA0999    | -0.09 | 0.00  | 0.00  | 0.28  |
| 23389 | KIAA1025    | 0.00  | -0.13 | 0.00  | 0.17  |
| 23390 | HYPH        | 0.00  | 0.00  | 0.00  | NaN   |
| 23392 | KIAA0368    | 0.00  | 0.00  | 0.00  | NaN   |
| 23394 | ADNP        | 0.09  | 0.13  | 0.05  | 0.28  |
| 23395 | LARS2       | -0.09 | 0.00  | -0.05 | 0.27  |
| 23396 | PIP5K1C     | 0.00  | 0.00  | 0.00  | NaN   |
| 23397 | KIAA0074    | 0.00  | 0.00  | 0.00  | NaN   |
| 23399 | HSA011916   | 0.00  | 0.00  | 0.00  | NaN   |
| 23400 | HSA9947     | -0.09 | 0.00  | 0.00  | -0.03 |
| 23401 | FRAT2       | 0.00  | 0.00  | -0.05 | 0.18  |
| 23403 | 20D7-FC4    | 0.09  | 0.00  | 0.00  | 0.01  |
| 23404 | RRP4        | 0.00  | 0.00  | 0.00  | NaN   |
| 23405 | DICER1      | 0.00  | 0.00  | 0.00  | NaN   |
| 23408 | SIRT5       | 0.00  | 0.00  | 0.10  | 0.59  |
| 23409 | SIRT4       | 0.00  | -0.13 | 0.00  | -0.21 |
| 23410 | SIRT3       | -0.27 | -0.13 | -0.05 | 0.19  |
| 23411 | SIRT1       | 0.00  | 0.00  | 0.00  | NaN   |
| 23412 | BUP         | -0.09 | 0.00  | 0.05  | 0.18  |
| 23413 | FREQ        | 0.00  | 0.00  | 0.00  | NaN   |
| 23414 | FOG2        | 0.18  | -0.25 | 0.00  | 0.00  |
| 23415 | KCNH4       | 0.00  | 0.13  | 0.00  | -0.01 |
| 23417 | MLYCD       | -0.09 | -0.13 | -0.05 | 0.18  |
| 23418 | CRB1        | 0.09  | 0.13  | 0.00  | 0.15  |
| 23420 | PM5         | 0.00  | 0.00  | 0.00  | NaN   |
| 23421 | ITGB3BP     | 0.00  | 0.00  | 0.00  | NaN   |
| 23423 | P24B        | 0.00  | 0.00  | 0.00  | NaN   |
| 23424 | PCTAIRE2BP  | 0.00  | 0.00  | 0.00  | NaN   |
| 23428 | SLC7A8      | 0.00  | 0.00  | 0.00  | NaN   |
| 23429 | RYBP        | -0.09 | 0.00  | -0.05 | 0.43  |
| 23430 | TPSD1       | 0.00  | 0.00  | -0.05 | -0.26 |
| 23431 | AP4E1       | 0.18  | 0.00  | 0.00  | 0.01  |
| 23432 | RE2         | 0.00  | 0.00  | 0.00  | NaN   |
| 23433 | TC10        | 0.00  | 0.00  | 0.00  | NaN   |
| 23434 | GR6         | 0.00  | 0.00  | 0.00  | NaN   |

|       |          |       |       |       |       |
|-------|----------|-------|-------|-------|-------|
| 23435 | TARDBP   | 0.00  | 0.00  | 0.00  | NaN   |
| 23436 | ELA3B    | -0.09 | 0.00  | 0.05  | 0.00  |
| 23438 | HARSL    | 0.00  | 0.00  | 0.00  | NaN   |
| 23443 | SLC35A3  | 0.00  | 0.00  | 0.00  | NaN   |
| 23450 | SF3B3    | 0.00  | 0.00  | 0.50  | 0.53  |
| 23451 | SF3B1    | 0.00  | 0.00  | 0.00  | NaN   |
| 23452 | ANGPTL2  | 0.00  | 0.00  | -0.05 | 0.03  |
| 23457 | ABCB9    | 0.00  | -0.13 | 0.00  | -0.06 |
| 23460 | ABCA6    | 0.18  | 0.13  | 0.00  | 0.20  |
| 23461 | ABCA5    | 0.18  | 0.13  | 0.00  | 0.30  |
| 23462 | HEY1     | 0.00  | 0.25  | 0.05  | 0.05  |
| 23463 | ICMT     | 0.00  | 0.00  | 0.00  | NaN   |
| 23464 | GCAT     | -0.09 | 0.00  | 0.05  | 0.52  |
| 23466 | CBX6     | -0.09 | 0.00  | 0.05  | 0.38  |
| 23468 | CBX5     | 0.00  | 0.00  | 0.00  | NaN   |
| 23469 | PHF3     | -0.09 | 0.00  | 0.00  | 0.24  |
| 23471 | TRAM     | 0.00  | 0.00  | 0.00  | NaN   |
| 23473 | CAPN7    | 0.00  | 0.00  | 0.05  | 0.27  |
| 23474 | YF13H12  | 0.09  | 0.00  | -0.10 | 0.49  |
| 23475 | QPRT     | 0.00  | 0.00  | 0.00  | NaN   |
| 23476 | BRD4     | 0.00  | 0.00  | 0.05  | 0.36  |
| 23478 | SPC18    | 0.00  | 0.00  | -0.05 | 0.56  |
| 23479 | NIFU     | 0.00  | -0.13 | 0.00  | 0.50  |
| 23480 | SEC61G   | 0.00  | 0.00  | 0.10  | 0.78  |
| 23481 | PES1     | 0.00  | 0.00  | 0.00  | NaN   |
| 23483 | TDPGD    | 0.00  | 0.13  | -0.05 | -0.10 |
| 23484 | LEPROTL1 | -0.09 | -0.25 | -0.05 | 0.29  |
| 23491 | CES3     | -0.09 | -0.13 | 0.00  | -0.18 |
| 23493 | HEY2     | 0.00  | 0.00  | 0.00  | NaN   |
| 23495 | TACI     | 0.00  | 0.00  | 0.00  | NaN   |
| 23498 | HAAO     | 0.00  | 0.00  | 0.00  | NaN   |
| 23499 | MACF1    | 0.00  | 0.00  | 0.00  | NaN   |
| 23500 | DAAM2    | 0.00  | 0.00  | 0.00  | NaN   |
| 23503 | KIAA0321 | 0.00  | 0.00  | 0.00  | NaN   |
| 23504 | KIAA0318 | 0.00  | 0.00  | 0.00  | NaN   |
| 23505 | KIAA0257 | 0.00  | 0.00  | 0.00  | NaN   |
| 23506 | KIAA0240 | 0.00  | 0.00  | 0.00  | NaN   |
| 23507 | KIAA0231 | 0.00  | 0.00  | 0.00  | NaN   |
| 23508 | KIAA0227 | 0.00  | 0.00  | 0.00  | NaN   |
| 23509 | POFUT1   | 0.00  | 0.00  | 0.05  | 0.38  |
| 23510 | KIAA0176 | 0.00  | 0.13  | 0.00  | 0.34  |
| 23512 | JJAZ1    | 0.00  | 0.00  | 0.00  | NaN   |
| 23513 | SCRIB    | 0.18  | 0.00  | 0.10  | 0.49  |
| 23514 | KIAA0146 | 0.00  | 0.00  | 0.00  | NaN   |
| 23516 | KIAA0062 | -0.09 | -0.25 | -0.10 | 0.29  |
| 23517 | KIAA0052 | 0.00  | 0.00  | -0.05 | 0.41  |
| 23518 | R3HDM    | 0.00  | 0.00  | -0.05 | 0.38  |



|       |           |       |       |       |       |
|-------|-----------|-------|-------|-------|-------|
| 23519 | ANP32D    | 0.00  | 0.00  | 0.00  | NaN   |
| 23520 | ANP32C    | 0.00  | 0.00  | 0.00  | NaN   |
| 23521 | RPL13A    | 0.00  | 0.00  | 0.00  | NaN   |
| 23522 | MORF      | 0.09  | 0.00  | 0.00  | 0.48  |
| 23523 | CABIN1    | 0.00  | 0.13  | 0.00  | 0.38  |
| 23524 | SRRM2     | 0.00  | 0.13  | 0.00  | 0.39  |
| 23526 | HA-1      | 0.00  | 0.00  | 0.00  | NaN   |
| 23527 | CENTB2    | 0.09  | 0.00  | 0.00  | 0.47  |
| 23528 | ZNF281    | 0.09  | 0.00  | 0.00  | -0.14 |
| 23529 | CLC       | 0.45  | 0.00  | 0.05  | 0.07  |
| 23530 | NNT       | 0.00  | 0.00  | 0.05  | 0.14  |
| 23531 | MMD       | 0.00  | 0.00  | 0.00  | 0.25  |
| 23532 | PRAME     | 0.09  | 0.00  | 0.00  | -0.08 |
| 23533 | P101-PI3K | 0.00  | 0.00  | 0.00  | NaN   |
| 23534 | TRN-SR    | 0.00  | 0.00  | 0.00  | NaN   |
| 23536 | ADAT1     | 0.00  | -0.13 | 0.05  | 0.38  |
| 23538 | OR52A1    | 0.00  | -0.13 | 0.00  | 0.13  |
| 23539 | SLC16A8   | -0.09 | 0.00  | 0.05  | 0.28  |
| 23541 | SEC14L2   | 0.00  | 0.00  | 0.00  | NaN   |
| 23542 | MAPK8IP2  | 0.00  | -0.25 | 0.00  | -0.08 |
| 23543 | RBM9      | 0.00  | 0.00  | 0.15  | 0.18  |
| 23544 | SEZ6L     | 0.00  | 0.13  | 0.00  | 0.45  |
| 23545 | ATP6V0A2  | 0.00  | 0.00  | 0.00  | NaN   |
| 23546 | SYNGR4    | 0.09  | 0.00  | 0.00  | 0.59  |
| 23547 | ILT7      | 0.09  | 0.00  | 0.00  | 0.06  |
| 23548 | OSRF      | 0.00  | 0.00  | 0.10  | 0.34  |
| 23549 | DNPEP     | 0.00  | 0.00  | 0.00  | NaN   |
| 23550 | TIC       | 0.00  | 0.00  | 0.00  | NaN   |
| 23552 | CCRK      | 0.00  | 0.00  | 0.00  | NaN   |
| 23553 | HYAL4     | 0.00  | 0.13  | 0.00  | 0.23  |
| 23554 | NET-2     | 0.00  | 0.13  | 0.00  | -0.16 |
| 23555 | NET-7     | 0.00  | 0.00  | 0.00  | NaN   |
| 23556 | PIGN      | -0.09 | 0.00  | -0.10 | 0.39  |
| 23558 | WBP2      | 0.00  | 0.13  | 0.00  | 0.21  |
| 23560 | CRFG      | 0.00  | 0.00  | 0.00  | NaN   |
| 23562 | CLDN14    | 0.00  | 0.00  | 0.00  | NaN   |
| 23563 | CHST5     | 1.00  | 0.00  | 1.00  | -0.16 |
| 23564 | DDAH2     | 0.00  | 0.00  | 0.00  | NaN   |
| 23566 | EDG7      | 0.00  | 0.00  | 0.05  | -0.06 |
| 23568 | BART1     | -0.09 | 0.00  | 0.00  | 0.29  |
| 23569 | PADI5     | -0.09 | 0.00  | 0.00  | -0.28 |
| 23580 | CEP4      | 0.00  | 0.00  | 0.00  | NaN   |
| 23583 | SMUG1     | 0.00  | 0.00  | 0.00  | NaN   |
| 23585 | SMP1      | -0.09 | 0.00  | 0.00  | -0.05 |
| 23586 | RIG-I     | -0.09 | 0.00  | 0.00  | 0.41  |
| 23587 | HSPC002   | 0.00  | 0.00  | 0.00  | NaN   |
| 23588 | LCP       | 0.00  | 0.13  | 0.00  | 0.23  |

|       |          |       |       |       |       |
|-------|----------|-------|-------|-------|-------|
| 23589 | CRHSP-24 | 0.00  | 0.00  | 0.00  | NaN   |
| 23590 | TPT      | -0.09 | 0.00  | 0.00  | 0.16  |
| 23591 | 4/2/2010 | 0.00  | -0.13 | 0.00  | 0.00  |
| 23592 | MAN1     | 0.09  | 0.00  | 0.00  | 0.44  |
| 23593 | C6orf34  | 0.00  | 0.00  | 0.00  | NaN   |
| 23594 | ORC6L    | -0.09 | 0.00  | -0.05 | 0.02  |
| 23595 | ORC3L    | 0.00  | 0.00  | 0.00  | NaN   |
| 23596 | OPN3     | 0.00  | 0.00  | 0.00  | NaN   |
| 23598 | ZNF278   | 0.00  | 0.00  | 0.00  | NaN   |
| 23600 | AMACR    | 0.00  | 0.00  | 0.10  | 0.06  |
| 23601 | CLECSF5  | 0.00  | 0.00  | 0.00  | NaN   |
| 23603 | CORO1C   | 0.00  | -0.13 | 0.00  | 0.36  |
| 23604 | DAPK2    | 0.00  | 0.00  | 0.00  | NaN   |
| 23607 | CD2AP    | 0.00  | 0.00  | 0.00  | NaN   |
| 23608 | MKRN1    | 0.00  | 0.00  | 0.00  | NaN   |
| 23609 | MKRN2    | 0.00  | 0.00  | 0.00  | NaN   |
| 23612 | PHLDA3   | 0.00  | 0.00  | 0.00  | NaN   |
| 23613 | PRKCBP1  | 0.18  | 0.00  | 0.00  | 0.38  |
| 23614 | PPY2     | 0.00  | 0.25  | 0.00  | 0.40  |
| 23615 | PYY2     | 0.00  | 0.13  | 0.00  | 0.15  |
| 23616 | SH3BP1   | -0.09 | 0.00  | 0.05  | -0.12 |
| 23617 | STK22B   | -0.09 | 0.00  | 0.00  | 0.18  |
| 23619 | ZIM2     | 0.09  | 0.13  | 0.05  | 0.13  |
| 23620 | NTSR2    | 0.00  | 0.00  | 0.00  | NaN   |
| 23621 | BACE     | -0.09 | 0.00  | 0.00  | 0.15  |
| 23623 | NESCA    | 0.09  | 0.13  | 0.00  | 0.46  |
| 23624 | CBLC     | 0.09  | 0.00  | 0.00  | 0.01  |
| 23625 | MTVR     | -0.09 | 0.00  | 0.05  | 0.16  |
| 23629 | BP75     | -0.09 | 0.00  | 0.05  | 0.07  |
| 23632 | CA14     | 0.00  | 0.13  | 0.05  | -0.03 |
| 23633 | KPNA6    | 0.50  | 0.00  | 0.00  | -0.16 |
| 23635 | SSBP2    | 0.00  | 0.00  | 0.00  | NaN   |
| 23636 | NUP62    | 0.00  | 0.00  | -0.05 | 0.14  |
| 23637 | GAPCENA  | 0.00  | 0.00  | 0.00  | NaN   |
| 23639 | TSLRP    | 0.00  | 0.00  | 0.05  | -0.06 |
| 23640 | HSPBP1   | 0.09  | 0.00  | 0.00  | 0.20  |
| 23641 | LDOC1    | 0.00  | 0.00  | -0.05 | 0.07  |
| 23643 | MD-2     | 0.00  | 0.25  | 0.00  | -0.06 |
| 23644 | RCD-8    | -0.09 | -0.13 | 0.00  | 0.44  |
| 23645 | PPP1R15A | 0.09  | 0.00  | 0.00  | -0.07 |
| 23646 | HU-K4    | 0.00  | 0.00  | 0.00  | NaN   |
| 23647 | POR1     | 0.00  | -0.13 | 0.00  | -0.02 |
| 23649 | POLA2    | -0.09 | 0.00  | 0.00  | 0.19  |
| 23650 | TRIM29   | -0.09 | 0.00  | -0.10 | 0.27  |
| 23654 | PLXNB2   | 0.00  | -0.25 | 0.05  | -0.11 |
| 23657 | SLC7A11  | 0.00  | 0.00  | 0.00  | NaN   |
| 23658 | LSM5     | 0.00  | 0.13  | 0.00  | -0.25 |

|       |            |       |       |       |       |
|-------|------------|-------|-------|-------|-------|
| 23659 | LYPLA3     | -0.09 | -0.13 | 0.00  | 0.10  |
| 23660 | ZFP95      | 0.18  | 0.00  | 0.00  | 0.56  |
| 23670 | TMEM2      | 0.00  | 0.00  | -0.05 | -0.18 |
| 23673 | STX12      | 0.00  | 0.00  | 0.00  | NaN   |
| 23677 | SH3BP4     | 0.00  | 0.00  | 0.00  | NaN   |
| 23678 | SGKL       | 0.00  | 0.00  | 0.00  | NaN   |
| 23682 | RAB38      | 0.00  | 0.00  | 0.00  | NaN   |
| 23683 | PRKCN      | 0.00  | 0.00  | 0.00  | NaN   |
| 23705 | IGSF4      | -0.09 | 0.00  | 0.00  | 0.12  |
| 23710 | GABARAPL1  | -0.09 | 0.00  | 0.00  | 0.09  |
| 23729 | CARKL      | 0.00  | 0.00  | 0.00  | NaN   |
| 23741 | CRI1       | 0.00  | 0.00  | 0.00  | NaN   |
| 23742 | C15orf2    | 0.00  | 0.00  | 0.00  | NaN   |
| 23743 | BHMT2      | 0.00  | 0.00  | 0.00  | NaN   |
| 23746 | AIPL1      | 0.00  | 0.00  | 0.00  | NaN   |
| 23753 | SDF2L1     | 0.00  | 0.00  | 0.00  | NaN   |
| 23759 | PPIL2      | 0.00  | 0.00  | 0.00  | NaN   |
| 23762 | OSBP2      | 0.00  | 0.00  | 0.00  | NaN   |
| 23764 | MAFF       | -0.09 | 0.00  | 0.05  | 0.57  |
| 23765 | IL17R      | 0.00  | 0.00  | 0.05  | 0.40  |
| 23767 | FLRT3      | 0.00  | 0.00  | 0.00  | NaN   |
| 23768 | FLRT2      | 0.00  | 0.13  | 0.00  | -0.03 |
| 23769 | FLRT1      | 0.00  | 0.00  | 0.00  | NaN   |
| 23770 | FKBP8      | 0.00  | 0.00  | 0.00  | NaN   |
| 23774 | BRD1       | 0.00  | -0.13 | 0.00  | 0.20  |
| 23779 | ARHGAP8    | 0.00  | 0.00  | 0.00  | NaN   |
| 23780 | APOL2      | 0.00  | 0.00  | 0.00  | NaN   |
| 23786 | MIL1       | 0.00  | 0.00  | 0.00  | 0.53  |
| 23787 | MTCH1      | 0.00  | 0.00  | 0.00  | NaN   |
| 23788 | MTCH2      | 0.00  | 0.00  | 0.00  | NaN   |
| 24138 | RI58       | 0.09  | 0.00  | 0.00  | -0.08 |
| 24139 | EML2       | 0.09  | 0.00  | 0.00  | 0.39  |
| 24141 | C20orf103  | 0.00  | 0.00  | 0.00  | NaN   |
| 24144 | TIP39      | 0.00  | 0.13  | 0.00  | 0.77  |
| 24145 | PANX1      | 0.00  | 0.00  | -0.10 | 0.11  |
| 24146 | CLDN15     | 0.18  | 0.00  | 0.00  | 0.04  |
| 24147 | FJX1       | 0.00  | 0.13  | 0.05  | 0.42  |
| 24148 | C20orf14   | 0.00  | 0.00  | 0.00  | NaN   |
| 24149 | HRIHFB2436 | 0.00  | 0.00  | 0.00  | NaN   |
| 24150 | TP53TG3    | 0.00  | 0.13  | -0.10 | 0.02  |
| 25758 | G2         | 0.00  | 0.00  | 0.05  | 0.03  |
| 25759 | SLI        | 0.00  | 0.00  | -0.05 | 0.08  |
| 25764 | HYPK       | 0.00  | 0.00  | 0.00  | NaN   |
| 25769 | SLC24A2    | 0.00  | -0.25 | -0.10 | 0.08  |
| 25770 | HS747E2A   | -0.09 | 0.00  | 0.00  | -0.03 |
| 25771 | C22orf4    | 0.00  | -0.25 | 0.00  | 0.27  |
| 25774 | HS322B1A   | 0.18  | 0.25  | 0.40  | -0.20 |

|       |               |       |       |       |       |
|-------|---------------|-------|-------|-------|-------|
| 25775 | HSN44A4A      | 0.00  | 0.00  | 0.00  | NaN   |
| 25776 | C22orf2       | -0.09 | 0.00  | 0.05  | 0.17  |
| 25778 | KIAA0472      | 0.00  | 0.13  | 0.00  | 0.48  |
| 25780 | GRP3          | 0.00  | 0.00  | 0.00  | NaN   |
| 25782 | RAB3-GAP150   | 0.09  | 0.00  | 0.05  | 0.62  |
| 25787 | DGS-A         | -0.09 | 0.00  | -0.05 | -0.24 |
| 25788 | RAD54B        | 0.00  | -0.13 | 0.00  | 0.47  |
| 25789 | BSMAP         | 0.00  | 0.00  | 0.00  | NaN   |
| 25790 | NESG1         | 0.00  | 0.00  | 0.00  | NaN   |
| 25792 | CIZ1          | -0.09 | 0.00  | 0.00  | 0.26  |
| 25793 | FBXO7         | 0.00  | 0.00  | 0.00  | NaN   |
| 25794 | FSCN2         | 0.00  | 0.00  | 0.00  | NaN   |
| 25796 | PGLS          | -0.09 | 0.00  | 0.00  | 0.13  |
| 25797 | QPCT          | 0.00  | 0.00  | 0.00  | NaN   |
| 25799 | ZF5128        | 0.00  | 0.13  | 0.05  | 0.79  |
| 25800 | LIV-1         | 0.00  | -0.13 | -0.25 | 0.43  |
| 25801 | GCA           | 0.00  | 0.00  | 0.00  | NaN   |
| 25802 | LMOD1         | 0.00  | 0.00  | 0.00  | NaN   |
| 25803 | PDEF          | 0.00  | 0.00  | 0.00  | NaN   |
| 25804 | LSM4          | 0.00  | 0.00  | 0.00  | NaN   |
| 25805 | NMA           | -0.09 | 0.00  | 0.05  | -0.03 |
| 25806 | VAX2          | 0.00  | 0.00  | 0.05  | 0.41  |
| 25807 | C22orf3       | -0.09 | 0.00  | 0.00  | 0.11  |
| 25809 | TTLL1         | 0.00  | 0.00  | 0.00  | NaN   |
| 25813 | CGI-51        | 0.00  | 0.00  | 0.05  | 0.25  |
| 25814 | E46L          | -0.09 | 0.00  | 0.00  | 0.32  |
| 25816 | GG2-1         | 0.00  | 0.00  | 0.00  | NaN   |
| 25819 | CCRN4L        | 0.00  | 0.00  | 0.00  | NaN   |
| 25820 | ARIH1         | 0.00  | 0.00  | 0.00  | NaN   |
| 25821 | MTO1          | 0.00  | 0.00  | 0.05  | 0.29  |
| 25822 | DNAJB5        | -0.09 | 0.00  | 0.10  | -0.09 |
| 25823 | TPSG1         | 0.00  | 0.00  | -0.05 | 0.05  |
| 25825 | BACE2         | 0.00  | 0.00  | 0.00  | NaN   |
| 25827 | FBXL2         | 0.00  | 0.00  | 0.00  | NaN   |
| 25828 | TXN2          | -0.09 | 0.00  | 0.05  | 0.48  |
| 25829 | C22orf5       | -0.09 | 0.00  | 0.05  | 0.17  |
| 25830 | SULT4A1       | 0.00  | 0.00  | 0.05  | -0.04 |
| 25832 | DJ328E19.C1.1 | 0.00  | 0.00  | 0.05  | 0.53  |
| 25833 | 10/11/2010    | -0.09 | 0.00  | -0.10 | 0.19  |
| 25834 | HGNT-IV-H     | 0.00  | 0.13  | 0.00  | 0.01  |
| 25836 | IDN3          | 0.00  | 0.00  | 0.05  | 0.57  |
| 25837 | RAB26         | 0.00  | 0.00  | 0.00  | NaN   |
| 25839 | COG4          | -0.09 | -0.13 | 0.05  | 0.29  |
| 25840 | DKFZP586A05   | 0.00  | 0.00  | 0.00  | NaN   |
| 25841 | DKFZP586C16   | 0.00  | 0.00  | 0.05  | -0.15 |
| 25842 | DKFZP547E21   | -0.09 | 0.00  | 0.05  | 0.65  |
| 25843 | PREI3         | 0.00  | 0.00  | 0.00  | NaN   |

|       |              |       |       |       |       |
|-------|--------------|-------|-------|-------|-------|
| 25844 | DKFZP566C24  | 0.00  | 0.00  | 0.00  | NaN   |
| 25847 | DKFZP566D19  | 0.00  | 0.00  | 0.00  | NaN   |
| 25849 | DKFZP564O08  | 0.00  | 0.00  | 0.05  | -0.01 |
| 25850 | ZNF345       | 0.00  | 0.00  | 0.00  | NaN   |
| 25852 | DKFZP434A04  | 0.00  | 0.00  | 0.00  | NaN   |
| 25854 | DKFZP564J102 | 0.00  | 0.00  | 0.00  | 0.36  |
| 25855 | BRMS1        | 0.00  | 0.00  | 0.05  | 0.20  |
| 25859 | PART1        | 0.00  | -0.13 | -0.10 | 0.05  |
| 25861 | DKFZP434N01  | 0.00  | 0.00  | 0.00  | NaN   |
| 25862 | DKFZP586D22  | 0.00  | 0.00  | 0.05  | 0.13  |
| 25864 | DKFZP564O24  | -0.09 | 0.00  | -0.10 | 0.06  |
| 25865 | PKD2         | 0.09  | 0.00  | 0.00  | 0.10  |
| 25870 | DKFZP566I102 | 0.00  | 0.00  | 0.10  | 0.07  |
| 25873 | RPL36        | 0.00  | 0.00  | 0.00  | NaN   |
| 25874 | DKFZP564B16  | 0.00  | 0.00  | 0.00  | NaN   |
| 25875 | DKFZP586A01  | 0.00  | 0.00  | 0.00  | NaN   |
| 25879 | DKFZP564O04  | 0.18  | 0.00  | 0.00  | -0.10 |
| 25880 | DKFZP564K20  | 0.00  | 0.00  | 0.00  | NaN   |
| 25888 | ZFP100       | 0.00  | 0.00  | 0.00  | NaN   |
| 25891 | DKFZP586H21  | 0.00  | 0.13  | 0.05  | -0.07 |
| 25893 | DKFZP434C09  | 0.00  | 0.13  | 0.00  | -0.15 |
| 25895 | DKFZP586D09  | 0.00  | 0.00  | 0.00  | NaN   |
| 25896 | DKFZP434B16  | 0.00  | 0.00  | 0.00  | NaN   |
| 25897 | DORFIN       | 0.09  | 0.00  | 0.10  | 0.11  |
| 25898 | ZNF363       | -0.09 | 0.00  | 0.00  | 0.02  |
| 25900 | DKFZP586I222 | -0.09 | 0.00  | 0.00  | -0.04 |
| 25901 | DKFZP586D06  | 0.00  | 0.00  | 0.00  | NaN   |
| 25903 | DKFZP586L15  | 0.00  | 0.00  | 0.00  | NaN   |
| 25906 | DKFZP564M08  | 0.00  | 0.00  | 0.00  | NaN   |
| 25907 | RIS1         | -0.09 | 0.00  | -0.05 | -0.07 |
| 25909 | DKFZP434N09  | 0.09  | 0.00  | 0.00  | -0.16 |
| 25913 | POT1         | 0.00  | 0.13  | 0.00  | -0.11 |
| 25915 | DKFZP564J012 | -0.09 | 0.00  | -0.05 | 0.40  |
| 25920 | COBRA1       | 0.00  | 0.00  | 0.00  | NaN   |
| 25924 | DKFZP586F10  | 0.00  | 0.00  | -0.05 | 0.13  |
| 25926 | DKFZP586L07  | 0.18  | 0.13  | 0.00  | 0.51  |
| 25928 | DKFZP564D20  | 0.00  | 0.13  | 0.00  | -0.05 |
| 25932 | CLIC4        | -0.09 | 0.00  | 0.00  | 0.26  |
| 25936 | DC8          | 0.00  | 0.00  | 0.00  | NaN   |
| 25937 | TAZ          | 0.00  | 0.00  | 0.05  | 0.35  |
| 25939 | SAMHD1       | 0.00  | -0.13 | 0.00  | -0.03 |
| 25940 | DKFZP564F05  | 0.00  | 0.00  | 0.00  | NaN   |
| 25941 | DKFZP586M15  | 0.00  | -0.13 | -0.25 | 0.44  |
| 25943 | H-L(3)MBT    | 0.00  | 0.00  | 0.00  | NaN   |
| 25945 | DKFZP566B08  | 0.00  | 0.00  | 0.00  | NaN   |
| 25949 | P29          | -0.09 | 0.00  | 0.00  | 0.04  |
| 25950 | DKFZP566K02  | 0.09  | 0.00  | 0.05  | 0.63  |

|       |              |       |       |       |       |
|-------|--------------|-------|-------|-------|-------|
| 25956 | SEC31B-1     | 0.00  | -0.13 | -0.05 | -0.13 |
| 25957 | DKFZp564B07  | 0.00  | 0.00  | 0.00  | NaN   |
| 25959 | DKFZP434N16  | 0.00  | 0.00  | 0.00  | NaN   |
| 25960 | TEM5         | 0.55  | -0.13 | 0.00  | 0.35  |
| 25961 | DKFZP586P22  | 0.09  | 0.00  | 0.00  | 0.41  |
| 25963 | DKFZP564G20  | 0.00  | 0.00  | 0.00  | NaN   |
| 25970 | SH2B         | 0.00  | 0.00  | 0.00  | NaN   |
| 25972 | DKFZP564G02  | 0.00  | 0.00  | 0.00  | NaN   |
| 25974 | DKFZP564I122 | 0.00  | 0.00  | 0.00  | NaN   |
| 25976 | DKFZP434J214 | 0.00  | 0.00  | 0.00  | NaN   |
| 25977 | DKFZP566B18  | -0.09 | 0.00  | 0.00  | 0.29  |
| 25978 | DKFZP564O12  | -0.09 | 0.00  | 0.05  | 0.29  |
| 25979 | DKFZp566O08  | 0.00  | -0.13 | 0.00  | -0.13 |
| 25980 | C2orf4       | 0.00  | 0.00  | 0.05  | 0.14  |
| 25983 | DKFZP564O09  | 0.00  | 0.00  | 0.00  | NaN   |
| 25984 | HAIK1        | 0.00  | 0.25  | 0.00  | 0.00  |
| 25987 | E2IG4        | 0.27  | 0.00  | 0.00  | 0.73  |
| 25988 | MIZF         | 0.00  | 0.00  | -0.05 | 0.30  |
| 25992 | DKFZP586B24  | 0.00  | 0.00  | -0.05 | 0.18  |
| 25994 | DKFZP564K24  | 0.00  | 0.00  | -0.05 | 0.21  |
| 25996 | DKFZP566E14  | -0.09 | 0.00  | 0.00  | 0.13  |
| 25998 | IBTK         | 0.00  | 0.00  | 0.00  | NaN   |
| 25999 | CLIPR-59     | 0.00  | 0.00  | 0.00  | NaN   |
| 26000 | DKFZP434P17  | 0.00  | 0.00  | 0.00  | NaN   |
| 26001 | DKFZP566H07  | 0.00  | 0.00  | 0.00  | NaN   |
| 26002 | DKFZP564G20  | 0.00  | 0.00  | 0.00  | NaN   |
| 26003 | GRASP55      | 0.00  | 0.00  | 0.00  | NaN   |
| 26005 | DKFZP586P01  | 0.18  | 0.13  | 0.00  | 0.65  |
| 26007 | DKFZP586B16  | -0.09 | 0.00  | 0.00  | 0.13  |
| 26009 | DKFZP564I052 | 0.00  | 0.00  | 0.00  | NaN   |
| 26011 | DKFZP564O04  | 0.27  | 0.00  | 0.00  | 0.50  |
| 26012 | DKFZP586J162 | 0.00  | 0.00  | 0.05  | 0.45  |
| 26015 | DKFZP727M11  | 0.00  | 0.00  | 0.00  | NaN   |
| 26017 | DKFZP586O01  | 0.00  | 0.00  | 0.05  | 0.51  |
| 26018 | LIG1         | -0.09 | 0.00  | 0.00  | 0.08  |
| 26019 | RENT2        | 0.00  | 0.00  | 0.00  | NaN   |
| 26024 | KIAA0632     | 0.18  | 0.00  | 0.00  | 0.38  |
| 26027 | THEA         | 0.00  | 0.00  | 0.00  | NaN   |
| 26030 | KIAA0599     | 0.00  | 0.00  | 0.00  | NaN   |
| 26031 | OSBPL3       | 0.00  | 0.13  | 0.00  | -0.09 |
| 26032 | KIAA0527     | 0.00  | 0.00  | 0.00  | NaN   |
| 26033 | KIAA0534     | 0.00  | 0.00  | 0.00  | NaN   |
| 26034 | PIP3-E       | 0.00  | 0.00  | 0.00  | NaN   |
| 26035 | KIAA0836     | 0.00  | 0.00  | 0.00  | NaN   |
| 26036 | COASTER      | 0.00  | 0.13  | 0.00  | -0.20 |
| 26037 | KIAA0440     | 0.00  | 0.00  | 0.00  | NaN   |
| 26039 | SS18L1       | 0.09  | 0.13  | 0.00  | 0.36  |

|       |             |       |       |       |       |
|-------|-------------|-------|-------|-------|-------|
| 26040 | SETBP1      | -0.09 | -0.25 | -0.05 | 0.19  |
| 26043 | KIAA0794    | 0.18  | 0.00  | 0.00  | 0.49  |
| 26045 | KIAA0416    | 0.00  | 0.00  | -0.10 | 0.08  |
| 26047 | CNTNAP2     | 0.00  | 0.00  | 0.00  | NaN   |
| 26048 | KIAA0557    | 0.00  | 0.00  | -0.05 | 0.39  |
| 26049 | KIAA0888    | 0.00  | 0.00  | 0.00  | NaN   |
| 26050 | KIAA0918    | 0.00  | 0.13  | -0.05 | -0.02 |
| 26051 | PPP1R16B    | 0.00  | -0.13 | 0.00  | 0.07  |
| 26052 | KIAA0820    | 0.00  | 0.00  | 0.00  | NaN   |
| 26054 | SUSP1       | 0.00  | 0.00  | 0.05  | -0.28 |
| 26056 | KIAA0857    | 0.00  | 0.00  | 0.00  | NaN   |
| 26057 | KIAA0697    | 0.00  | 0.00  | 0.00  | NaN   |
| 26058 | TNRC15      | 0.00  | 0.00  | 0.00  | NaN   |
| 26059 | KIAA0378    | 0.00  | 0.00  | -0.10 | -0.01 |
| 26060 | APPL        | 0.00  | 0.00  | -0.10 | 0.41  |
| 26063 | DECR2       | 0.00  | 0.00  | -0.05 | 0.09  |
| 26064 | RAI14       | 0.00  | 0.00  | 0.15  | 0.44  |
| 26065 | DKFZP434D13 | 0.00  | 0.00  | 0.05  | 0.30  |
| 26073 | DKFZP586F15 | 0.50  | 0.50  | 0.50  | 0.51  |
| 26082 | DKFZP434L18 | 0.00  | -0.13 | -0.15 | 0.23  |
| 26083 | DKFZP434O04 | 0.00  | 0.25  | 0.00  | 0.11  |
| 26084 | DKFZP434D14 | 0.00  | 0.00  | 0.00  | NaN   |
| 26085 | KLK13       | 0.00  | 0.00  | 0.00  | NaN   |
| 26088 | GGA1        | -0.09 | 0.00  | 0.05  | 0.34  |
| 26091 | DKFZP564G09 | 0.00  | 0.00  | 0.00  | NaN   |
| 26092 | DKFZP586G01 | 0.00  | 0.00  | 0.00  | NaN   |
| 26093 | DKFZP586M10 | 0.09  | 0.00  | 0.00  | 0.09  |
| 26094 | DKFZp434K11 | 0.00  | 0.00  | 0.00  | NaN   |
| 26095 | DKFZP566K05 | 0.00  | 0.00  | 0.00  | NaN   |
| 26097 | DKFZP547E10 | 0.09  | 0.13  | 0.00  | 0.18  |
| 26098 | DKFZp586F10 | 0.00  | 0.00  | -0.05 | 0.15  |
| 26099 | DKFZP566C04 | 0.00  | 0.00  | 0.00  | NaN   |
| 26100 | DKFZP434J15 | 0.00  | 0.00  | 0.10  | 0.52  |
| 26102 | DKFZP434A06 | 0.00  | 0.00  | 0.00  | NaN   |
| 26103 | PAL         | 0.09  | 0.00  | -0.05 | 0.14  |
| 26108 | PYGO1       | 0.00  | 0.00  | 0.05  | 0.26  |
| 26112 | DKFZP434C17 | 0.00  | 0.00  | 0.00  | NaN   |
| 26115 | DKFZP564D16 | 0.27  | 0.13  | 0.00  | 0.70  |
| 26118 | WSB1        | 0.00  | 0.13  | 0.00  | 0.40  |
| 26119 | ARH         | -0.09 | 0.00  | 0.00  | -0.01 |
| 26121 | PRPF31      | 0.09  | 0.00  | 0.00  | 0.35  |
| 26123 | DKFZP564D11 | 0.00  | 0.00  | -0.05 | 0.38  |
| 26128 | DKFZP586B09 | 0.00  | 0.00  | 0.00  | NaN   |
| 26130 | DKFZP434C21 | 0.00  | 0.00  | 0.00  | NaN   |
| 26133 | C20orf188   | 0.00  | 0.13  | 0.00  | 0.62  |
| 26135 | PAI-RBP1    | 0.00  | 0.00  | 0.00  | NaN   |
| 26136 | TES         | 0.00  | 0.25  | 0.00  | 0.38  |

|       |             |       |       |       |       |
|-------|-------------|-------|-------|-------|-------|
| 26137 | ZNF288      | 0.00  | 0.00  | 0.00  | NaN   |
| 26138 | DKFZP434F12 | 0.00  | 0.00  | 0.00  | NaN   |
| 26140 | DKFZP434B10 | 0.00  | 0.00  | 0.00  | NaN   |
| 26145 | DKFZP434M15 | 0.09  | 0.00  | 0.00  | 0.13  |
| 26146 | MIP-T3      | 0.00  | 0.00  | -0.05 | 0.12  |
| 26148 | DKFZP564P19 | 0.00  | 0.00  | -0.05 | 0.23  |
| 26150 | DKFZP566F05 | 0.00  | 0.00  | 0.00  | NaN   |
| 26151 | DKFZP564C10 | 0.00  | 0.13  | 0.00  | 0.48  |
| 26152 | ZNF337      | 0.00  | 0.13  | -0.05 | 0.24  |
| 26154 | ABCA12      | 0.00  | 0.00  | 0.00  | NaN   |
| 26155 | DKFZP564C18 | 0.00  | 0.00  | 0.00  | NaN   |
| 26165 | DKFZP434B20 | -0.18 | 0.00  | 0.00  | 0.01  |
| 26168 | SENP3       | 0.00  | 0.00  | 0.00  | NaN   |
| 26173 | DKFZP586J06 | 0.00  | 0.00  | 0.05  | 0.29  |
| 26175 | DKFZP564F11 | 0.00  | 0.00  | 0.00  | NaN   |
| 26189 | OR1A2       | 0.00  | 0.00  | 0.00  | NaN   |
| 26190 | FBXW2       | 0.00  | 0.00  | 0.00  | NaN   |
| 26191 | PTPN22      | 0.27  | 0.13  | 0.05  | -0.05 |
| 26205 | GMEB2       | 0.09  | 0.00  | 0.00  | 0.11  |
| 26206 | SPAG8       | -0.09 | 0.00  | 0.10  | 0.01  |
| 26207 | RDGBB       | 0.18  | 0.13  | 0.00  | 0.29  |
| 26211 | OR2F1       | 0.00  | 0.00  | 0.00  | NaN   |
| 26220 | DGCR5       | -0.09 | 0.00  | -0.05 | 0.02  |
| 26225 | ARL5        | 0.00  | 0.00  | 0.00  | NaN   |
| 26227 | PHGDH       | 0.09  | 0.13  | 0.05  | 0.09  |
| 26229 | B3GAT3      | 0.00  | 0.00  | 0.00  | NaN   |
| 26230 | TIAM2       | 0.00  | 0.00  | 0.00  | NaN   |
| 26232 | FBXO2       | 0.00  | 0.00  | 0.00  | NaN   |
| 26233 | FBXL6       | 0.18  | 0.00  | 0.15  | 0.16  |
| 26234 | FBXL5       | 0.00  | 0.00  | -0.10 | 0.29  |
| 26235 | FBXL4       | 0.00  | 0.00  | 0.00  | NaN   |
| 26238 | HGC6.2      | 0.00  | 0.00  | 0.00  | NaN   |
| 26239 | XP5         | 0.00  | 0.00  | 0.00  | NaN   |
| 26240 | D6S2654E    | 0.00  | 0.00  | 0.00  | NaN   |
| 26249 | KLHL3       | 0.00  | -0.13 | 0.00  | -0.01 |
| 26251 | KCNG2       | 0.09  | 0.00  | -0.25 | 0.15  |
| 26253 | CLECSF9     | -0.09 | 0.00  | 0.00  | -0.02 |
| 26255 | PTTG3       | 0.09  | 0.25  | 0.05  | 0.06  |
| 26256 | CABYR       | 0.00  | 0.00  | -0.15 | 0.37  |
| 26257 | NKX2.8      | 0.00  | 0.00  | 0.00  | NaN   |
| 26261 | FBXO24      | 0.18  | 0.00  | 0.00  | 0.22  |
| 26263 | FBXO22      | 0.00  | 0.00  | 0.00  | NaN   |
| 26266 | SLC13A4     | 0.00  | 0.00  | 0.00  | NaN   |
| 26268 | FBXO9       | 0.00  | 0.00  | 0.00  | NaN   |
| 26271 | FBXO5       | 0.00  | 0.00  | 0.00  | NaN   |
| 26273 | FBXO3       | 0.00  | 0.00  | 0.05  | 0.49  |
| 26275 | HIBCH       | 0.00  | 0.00  | 0.00  | NaN   |



|       |          |       |       |       |       |
|-------|----------|-------|-------|-------|-------|
| 26276 | VPS33B   | 0.00  | 0.00  | 0.00  | NaN   |
| 26277 | TINF2    | 0.00  | 0.00  | 0.00  | NaN   |
| 26278 | SACS     | 0.00  | 0.00  | -0.05 | -0.01 |
| 26279 | PLA2G2D  | 0.00  | 0.00  | 0.00  | NaN   |
| 26281 | FGF20    | 0.09  | -0.13 | -0.05 | 0.08  |
| 26284 | ERAL1    | 0.00  | 0.38  | 0.00  | 0.70  |
| 26285 | CLDN17   | 0.00  | 0.00  | 0.00  | NaN   |
| 26286 | ARFGAP1  | 0.50  | 0.00  | 0.00  | 0.29  |
| 26287 | ANKRD2   | 0.00  | 0.00  | -0.05 | -0.05 |
| 26289 | AK5      | 0.00  | 0.00  | 0.00  | NaN   |
| 26290 | GALNT8   | -0.09 | 0.00  | 0.05  | -0.02 |
| 26291 | FGF21    | 0.09  | 0.00  | 0.00  | -0.04 |
| 26292 | MYCBP    | 0.00  | 0.00  | 0.00  | NaN   |
| 26297 | DELGEF   | 0.00  | 0.00  | 0.00  | NaN   |
| 26298 | EHF      | 0.00  | 0.13  | 0.05  | 0.19  |
| 26330 | GAPDS    | 0.00  | 0.00  | 0.00  | NaN   |
| 26333 | OR7A17   | 0.00  | 0.00  | 0.00  | NaN   |
| 26353 | H11      | 0.00  | -0.13 | 0.00  | 0.13  |
| 26354 | E2IG3    | -0.09 | 0.00  | -0.10 | 0.49  |
| 26355 | E2IG5    | 0.00  | 0.00  | 0.00  | NaN   |
| 26468 | LHX6     | 0.00  | 0.00  | 0.00  | NaN   |
| 26469 | PTPN18   | 0.00  | 0.00  | 0.00  | 0.35  |
| 26470 | PSK-1    | 0.00  | 0.00  | 0.00  | NaN   |
| 26471 | P8       | 0.00  | 0.00  | 0.00  | NaN   |
| 26472 | PPP1R14B | 0.00  | 0.00  | 0.00  | NaN   |
| 26476 | OR10J1   | 0.00  | 0.00  | 0.00  | NaN   |
| 26499 | PLEK2    | 0.00  | 0.00  | 0.05  | 0.16  |
| 26502 | NARF     | 0.00  | 0.00  | 0.00  | NaN   |
| 26503 | SLC17A5  | 0.00  | 0.00  | 0.05  | 0.14  |
| 26504 | CNNM4    | 0.00  | 0.00  | 0.00  | NaN   |
| 26505 | CNNM3    | 0.00  | 0.00  | 0.00  | NaN   |
| 26507 | CNNM1    | 0.00  | -0.13 | -0.05 | 0.10  |
| 26508 | HEYL     | 0.00  | 0.00  | 0.00  | NaN   |
| 26509 | FER1L3   | 0.00  | 0.00  | 0.00  | NaN   |
| 26511 | CHIC2    | 0.00  | 0.00  | 0.00  | NaN   |
| 26512 | DDX26    | 0.00  | 0.00  | 0.00  | NaN   |
| 26515 | FXC1     | 0.00  | -0.13 | 0.00  | 0.32  |
| 26517 | TIMM13   | 0.00  | 0.00  | 0.00  | NaN   |
| 26519 | TIMM10   | 0.00  | 0.00  | 0.00  | NaN   |
| 26520 | TIMM9    | 0.00  | 0.00  | 0.05  | -0.02 |
| 26521 | TIMM8B   | 0.00  | 0.00  | 0.00  | NaN   |
| 26523 | EIF2C1   | 0.00  | 0.00  | 0.00  | NaN   |
| 26528 | DAZAP1   | 0.00  | 0.00  | 0.00  | NaN   |
| 26529 | OR12D2   | 0.00  | 0.00  | 0.00  | NaN   |
| 26531 | OR11A1   | 0.00  | 0.00  | 0.00  | NaN   |
| 26532 | OR10H3   | 0.00  | 0.00  | 0.00  | NaN   |
| 26538 | OR10H2   | 0.00  | 0.00  | 0.00  | NaN   |

|       |             |       |       |       |       |
|-------|-------------|-------|-------|-------|-------|
| 26539 | OR10H1      | 0.00  | 0.00  | 0.00  | NaN   |
| 26574 | DED         | 0.00  | -0.13 | 0.00  | 0.16  |
| 26575 | RGS17       | 0.00  | 0.00  | 0.00  | NaN   |
| 26577 | PCOLCE2     | 0.00  | 0.00  | -0.05 | 0.08  |
| 26578 | OSTF1       | 0.00  | 0.00  | -0.05 | -0.12 |
| 26585 | CKTSF1B1    | 0.00  | 0.00  | 0.00  | NaN   |
| 26586 | CKAP2       | 0.00  | 0.00  | 0.00  | NaN   |
| 26589 | MRPL46      | 0.00  | 0.00  | -0.05 | 0.30  |
| 26608 | TBL2        | -0.09 | 0.00  | 0.00  | 0.37  |
| 26648 | OR7E24P     | 0.00  | 0.13  | 0.00  | 0.01  |
| 26658 | OR7C2       | 0.00  | 0.00  | 0.00  | NaN   |
| 26659 | OR7C1       | 0.00  | 0.00  | 0.00  | NaN   |
| 26692 | OR2W1       | 0.00  | 0.00  | 0.00  | NaN   |
| 26707 | OR2J2       | 0.00  | 0.00  | 0.00  | NaN   |
| 26747 | NUFIP1      | 0.00  | 0.00  | -0.05 | 0.32  |
| 26750 | RPS6KC1     | 0.00  | 0.00  | 0.00  | NaN   |
| 26751 | DKFZP586F13 | 0.00  | 0.00  | 0.00  | NaN   |
| 26762 | HAVCR-1     | 0.00  | 0.00  | 0.00  | NaN   |
| 26872 | STEAP       | 0.09  | 0.00  | 0.00  | 0.23  |
| 26873 | OPLAH       | 0.18  | 0.00  | 0.10  | 0.39  |
| 26952 | PBI         | 0.00  | 0.00  | 0.00  | NaN   |
| 26953 | RANBP6      | -0.09 | -0.13 | -0.05 | 0.70  |
| 26959 | HBP1        | 0.09  | 0.00  | 0.00  | -0.15 |
| 26960 | NBEA        | 0.00  | 0.00  | 0.00  | NaN   |
| 26973 | CHORDC1     | 0.00  | 0.00  | 0.00  | NaN   |
| 26984 | SEC22A      | 0.00  | 0.00  | 0.00  | NaN   |
| 26986 | PABPC1      | 0.18  | 0.00  | 0.00  | 0.27  |
| 26993 | NAKAP95     | 0.00  | 0.00  | 0.00  | NaN   |
| 26994 | RNF11       | 0.00  | 0.00  | 0.00  | NaN   |
| 26998 | FETUB       | 0.09  | 0.00  | 0.05  | 0.13  |
| 26999 | CYFIP2      | 0.00  | 0.00  | 0.00  | NaN   |
| 27000 | ZRF1        | 0.09  | 0.00  | 0.00  | 0.52  |
| 27004 | TCL6        | 0.00  | 0.00  | 0.00  | NaN   |
| 27005 | USP21       | 0.00  | 0.00  | 0.00  | NaN   |
| 27006 | FGF22       | 0.00  | 0.00  | -0.05 | 0.02  |
| 27010 | TPK1        | 0.00  | 0.00  | 0.00  | NaN   |
| 27012 | KV8.1       | 0.18  | 0.13  | 0.10  | 0.37  |
| 27013 | CGI-57      | 0.00  | 0.00  | 0.00  | NaN   |
| 27019 | DNAI1       | -0.09 | 0.13  | 0.10  | 0.02  |
| 27020 | SDFR1       | 0.00  | 0.00  | 0.00  | NaN   |
| 27022 | FOXO3       | 0.00  | 0.00  | 0.00  | NaN   |
| 27023 | FOXO1       | 0.09  | 0.00  | 0.05  | -0.25 |
| 27030 | MLH3        | 0.00  | 0.00  | 0.00  | NaN   |
| 27032 | ATP2C1      | 0.00  | 0.00  | 0.00  | NaN   |
| 27033 | TZFP        | 0.00  | 0.00  | 0.00  | NaN   |
| 27034 | ACAD8       | -0.09 | 0.00  | -0.15 | 0.52  |
| 27036 | SIGLEC7     | 0.00  | 0.13  | 0.00  | 0.45  |

|       |              |       |       |       |       |
|-------|--------------|-------|-------|-------|-------|
| 27037 | HTF9C        | -0.09 | 0.00  | 0.00  | -0.07 |
| 27039 | PKD2L2       | 0.00  | -0.13 | 0.00  | -0.01 |
| 27042 | DJ434O14.5   | 0.00  | 0.00  | 0.00  | NaN   |
| 27043 | PELP1        | 0.50  | 0.00  | 0.00  | -0.14 |
| 27044 | p100         | 0.00  | 0.25  | 0.00  | 0.75  |
| 27063 | CARP         | 0.09  | 0.00  | 0.00  | -0.03 |
| 27065 | D4S234E      | 0.00  | -0.13 | -0.15 | 0.34  |
| 27067 | STAU2        | 0.00  | 0.25  | 0.00  | 0.23  |
| 27068 | SID6-306     | 0.00  | 0.00  | 0.00  | NaN   |
| 27069 | GHITM        | 0.09  | 0.00  | -0.05 | 0.39  |
| 27071 | DAPP1        | 0.00  | 0.00  | 0.00  | NaN   |
| 27072 | VPS41        | 0.18  | 0.00  | 0.00  | 0.32  |
| 27074 | LAMP3        | 0.09  | 0.00  | 0.00  | -0.02 |
| 27075 | NET-6        | 0.00  | 0.13  | 0.00  | 0.15  |
| 27076 | C4.4A        | 0.09  | 0.00  | -0.10 | 0.33  |
| 27077 | B9           | 0.00  | 0.00  | 0.00  | NaN   |
| 27087 | B3GAT1       | -0.09 | 0.00  | -0.10 | 0.26  |
| 27089 | QP-C         | 0.00  | -0.13 | 0.00  | 0.10  |
| 27090 | SIAT7D       | -0.09 | 0.00  | -0.05 | 0.19  |
| 27091 | CACNG5       | 0.18  | 0.13  | 0.00  | -0.11 |
| 27094 | KCNMB3       | 0.09  | 0.00  | 0.05  | 0.35  |
| 27095 | BET3         | 0.00  | 0.00  | 0.00  | NaN   |
| 27097 | TAF5L        | 0.09  | 0.00  | 0.00  | 0.21  |
| 27098 | CLUL1        | 0.00  | 0.00  | 0.00  | NaN   |
| 27099 | NSG-X        | 0.00  | 0.25  | 0.00  | 0.77  |
| 27101 | SIP          | 0.00  | 0.00  | 0.05  | 0.29  |
| 27107 | ZNF-U69274   | 0.00  | 0.00  | 0.00  | NaN   |
| 27109 | ATPW         | 0.00  | 0.00  | 0.00  | NaN   |
| 27113 | BBC3         | 0.09  | 0.00  | 0.00  | -0.02 |
| 27115 | PDE7B        | 0.00  | 0.00  | 0.05  | 0.06  |
| 27120 | DKKL1-pendin | 0.00  | 0.00  | 0.00  | NaN   |
| 27121 | DKK4         | 0.36  | 0.00  | -0.05 | 0.02  |
| 27122 | DKK3         | 0.00  | 0.00  | 0.00  | NaN   |
| 27123 | DKK2         | 0.00  | 0.00  | 0.00  | NaN   |
| 27124 | PIB5PA       | 0.00  | 0.00  | 0.00  | NaN   |
| 27125 | AF5Q31       | 0.00  | -0.13 | 0.00  | 0.37  |
| 27128 | PSCD4        | 0.00  | 0.00  | 0.05  | 0.10  |
| 27129 | HSPB7        | 0.00  | 0.00  | 0.00  | NaN   |
| 27130 | INVS         | 0.00  | 0.00  | 0.00  | NaN   |
| 27131 | SNX5         | 0.00  | 0.00  | 0.00  | NaN   |
| 27132 | CPNE7        | -0.09 | -0.13 | -0.05 | -0.18 |
| 27134 | TJP3         | 0.00  | 0.00  | 0.00  | NaN   |
| 27136 | MORC         | 0.00  | 0.00  | 0.00  | NaN   |
| 27141 | CIDEB        | 0.00  | 0.00  | 0.00  | NaN   |
| 27147 | KIAA1277     | 0.00  | 0.00  | 0.00  | NaN   |
| 27156 | RTDR1        | 0.00  | 0.00  | 0.00  | NaN   |
| 27158 | NR1          | 0.00  | 0.00  | 0.00  | NaN   |

|       |               |       |       |       |       |
|-------|---------------|-------|-------|-------|-------|
| 27159 | TSA1902       | 0.09  | 0.00  | 0.00  | 0.09  |
| 27165 | GA            | 0.00  | 0.00  | 0.00  | NaN   |
| 27173 | SLC39A1       | 0.09  | 0.13  | 0.00  | 0.36  |
| 27175 | TUBG2         | 0.00  | -0.13 | 0.00  | -0.14 |
| 27178 | FIL1(ZETA)    | 0.00  | 0.00  | 0.00  | NaN   |
| 27179 | FIL1(EPSILON) | 0.00  | 0.00  | 0.00  | NaN   |
| 27180 | SIGLEC9       | 0.00  | 0.13  | 0.00  | 0.26  |
| 27181 | SIGLEC8       | 0.00  | 0.13  | -0.05 | 0.33  |
| 27183 | VPS4A         | 0.00  | -0.13 | 0.05  | 0.35  |
| 27190 | IL17B         | 0.00  | 0.00  | 0.00  | NaN   |
| 27229 | 76P           | 0.00  | 0.00  | 0.00  | NaN   |
| 27230 | SERP1         | 0.00  | 0.00  | 0.05  | 0.31  |
| 27231 | MIBP          | 0.00  | 0.00  | 0.00  | NaN   |
| 27232 | GNMT          | 0.00  | 0.00  | 0.00  | NaN   |
| 27233 | SULT1C2       | 0.00  | 0.00  | 0.00  | NaN   |
| 27235 | CL640         | 0.00  | 0.00  | 0.00  | NaN   |
| 27236 | HSU52521      | 0.00  | 0.00  | 0.00  | 0.57  |
| 27237 | ARHGEF16      | 0.00  | 0.00  | 0.00  | NaN   |
| 27239 | A             | -0.09 | 0.00  | 0.00  | 0.02  |
| 27240 | SIT           | -0.09 | 0.00  | 0.10  | -0.05 |
| 27241 | B1            | 0.00  | 0.13  | 0.00  | 0.08  |
| 27242 | TNFRSF21      | 0.00  | 0.00  | 0.00  | NaN   |
| 27243 | BC-2          | 0.00  | 0.13  | 0.00  | 0.57  |
| 27244 | PA26          | 0.00  | 0.00  | 0.05  | -0.04 |
| 27245 | DJ159A19.3    | -0.09 | 0.00  | 0.00  | 0.08  |
| 27246 | ZNF364        | 0.00  | 0.00  | 0.05  | -0.05 |
| 27247 | HIRIP5        | 0.00  | 0.00  | 0.00  | NaN   |
| 27249 | CL25022       | 0.00  | 0.00  | 0.00  | NaN   |
| 27250 | PDCD4         | 0.00  | 0.00  | -0.05 | 0.27  |
| 27252 | AB026190      | 0.00  | 0.00  | 0.00  | NaN   |
| 27253 | PCDH17        | 0.00  | 0.00  | 0.00  | NaN   |
| 27255 | CNTN6         | 0.00  | 0.00  | -0.05 | 0.15  |
| 27257 | LSM1          | 0.45  | -0.13 | -0.05 | 0.75  |
| 27258 | LSM3          | 0.00  | 0.00  | 0.00  | NaN   |
| 27284 | SULT1B1       | 0.00  | 0.00  | 0.00  | NaN   |
| 27285 | TEKT2         | 0.00  | 0.00  | 0.00  | NaN   |
| 27287 | VENTX2        | 0.00  | 0.00  | -0.10 | -0.05 |
| 27288 | HNRNPG-T      | 0.00  | 0.00  | 0.00  | NaN   |
| 27289 | RHO6          | 0.00  | 0.00  | 0.00  | NaN   |
| 27290 | SPINK4        | -0.09 | 0.00  | 0.05  | -0.22 |
| 27291 | PSORT         | 0.00  | 0.00  | -0.05 | -0.01 |
| 27292 | HSA9761       | 0.00  | 0.00  | 0.00  | NaN   |
| 27293 | ASML3B        | 0.00  | 0.00  | 0.00  | NaN   |
| 27295 | ALP           | 0.00  | 0.00  | -0.05 | -0.03 |
| 27296 | C20orf10      | 0.00  | 0.00  | 0.00  | NaN   |
| 27297 | CGRP-RCP      | 0.00  | 0.00  | 0.00  | NaN   |
| 27299 | ADAMDEC1      | 0.00  | -0.13 | -0.05 | 0.07  |

|       |             |       |       |       |       |
|-------|-------------|-------|-------|-------|-------|
| 27300 | AF020591    | 0.00  | 0.13  | 0.05  | 0.42  |
| 27302 | BMP10       | 0.00  | 0.00  | 0.00  | NaN   |
| 27303 | RBMS3       | 0.00  | 0.00  | 0.00  | NaN   |
| 27304 | MOCS3       | 0.09  | 0.13  | 0.05  | 0.43  |
| 27309 | HSA6591     | 0.00  | 0.00  | 0.00  | NaN   |
| 27314 | RAB30       | 0.00  | 0.00  | 0.05  | -0.19 |
| 27315 | FRAG1       | 0.00  | -0.13 | 0.00  | 0.22  |
| 27324 | TNRC9       | 0.00  | 0.00  | -0.05 | 0.13  |
| 27329 | ANGPTL3     | 0.00  | 0.00  | 0.00  | NaN   |
| 27332 | NP220       | 0.00  | 0.00  | 0.00  | NaN   |
| 27333 | GOLPH4      | 0.00  | 0.00  | 0.00  | NaN   |
| 27335 | M9          | 0.00  | 0.00  | 0.00  | NaN   |
| 27338 | E2-EPF      | 0.09  | 0.00  | 0.00  | 0.02  |
| 27339 | NMP200      | 0.00  | 0.00  | 0.00  | NaN   |
| 27340 | DRIM        | 0.00  | 0.00  | 0.00  | NaN   |
| 27341 | CGI-96      | 0.00  | 0.00  | 0.10  | 0.45  |
| 27342 | RABEX5      | -0.09 | 0.00  | 0.00  | 0.36  |
| 27343 | POLL        | 0.00  | -0.13 | -0.05 | 0.21  |
| 27345 | KCNMB4      | 0.09  | 0.00  | 0.00  | -0.16 |
| 27346 | MAC30       | 0.00  | 0.25  | 0.00  | 0.21  |
| 27347 | STK39       | 0.00  | 0.00  | 0.00  | NaN   |
| 27350 | APOBEC1L    | -0.09 | 0.00  | 0.05  | 0.27  |
| 27352 | DJ1042K10.2 | -0.09 | 0.00  | 0.05  | 0.08  |
| 27429 | PRSS25      | 0.00  | 0.00  | 0.00  | NaN   |
| 27430 | MAT2B       | 0.00  | 0.00  | 0.00  | NaN   |
| 27434 | POLM        | 0.00  | 0.00  | 0.00  | NaN   |
| 27436 | EML4        | 0.00  | 0.00  | 0.00  | NaN   |
| 27440 | CECR5       | 0.00  | 0.00  | 0.05  | 0.44  |
| 27445 | PCLO        | 0.09  | 0.00  | 0.00  | 0.10  |
| 28231 | SLC21A12    | 0.09  | 0.13  | 0.00  | -0.11 |
| 28232 | SLC21A11    | 0.00  | 0.00  | 0.00  | NaN   |
| 28234 | SLC21A8     | 0.00  | 0.00  | 0.00  | NaN   |
| 28511 | KBRAS2      | 0.00  | 0.13  | 0.00  | 0.41  |
| 28513 | CDH19       | -0.09 | 0.00  | -0.10 | 0.02  |
| 28951 | GS3955      | 0.00  | 0.00  | 0.00  | NaN   |
| 28954 | REM         | 0.00  | 0.00  | 0.00  | NaN   |
| 28955 | MYLE        | 0.00  | 0.00  | 0.00  | NaN   |
| 28956 | HSPC003     | 0.00  | 0.13  | 0.05  | 0.25  |
| 28957 | MRPS28      | 0.00  | 0.50  | 0.50  | 0.60  |
| 28958 | HSPC009     | 0.00  | -0.13 | 0.00  | 0.28  |
| 28959 | LR8         | 0.00  | 0.00  | -0.05 | 0.04  |
| 28960 | HSPC015     | -0.09 | 0.00  | -0.15 | 0.38  |
| 28962 | HSPC019     | 0.00  | 0.00  | 0.10  | 0.37  |
| 28964 | GIT1        | 0.00  | 0.38  | 0.00  | 0.45  |
| 28965 | VLCS-H1     | 0.00  | 0.00  | 0.00  | NaN   |
| 28966 | SBBI31      | 0.00  | 0.00  | 0.00  | NaN   |
| 28968 | NTT5        | 0.00  | 0.00  | 0.00  | NaN   |

|       |             |       |       |       |       |
|-------|-------------|-------|-------|-------|-------|
| 28969 | HSPC028     | 0.00  | 0.13  | 0.00  | 0.21  |
| 28971 | PTD015      | 0.27  | 0.00  | 0.00  | 0.84  |
| 28972 | SPC12       | -0.09 | 0.00  | -0.10 | 0.54  |
| 28973 | MRPS18B     | 0.00  | 0.00  | 0.00  | NaN   |
| 28974 | HSPC023     | 0.00  | 0.00  | 0.00  | NaN   |
| 28977 | MRPL42      | 0.00  | 0.13  | 0.00  | 0.11  |
| 28978 | PTD011      | 0.00  | 0.00  | 0.00  | NaN   |
| 28981 | CDV-1       | 0.00  | 0.00  | 0.00  | NaN   |
| 28983 | DESC1       | 0.00  | 0.00  | 0.05  | 0.01  |
| 28984 | RGC32       | 0.00  | 0.00  | -0.05 | 0.05  |
| 28990 | HT001       | 0.00  | 0.00  | 0.00  | NaN   |
| 28992 | LRP16       | 0.00  | 0.00  | 0.00  | NaN   |
| 28996 | HIPK2       | 0.00  | 0.00  | 0.00  | NaN   |
| 28997 | PRO0611     | 0.00  | 0.00  | 0.05  | -0.18 |
| 28998 | MRPL13      | 0.00  | 0.38  | 0.15  | 0.63  |
| 28999 | KLF15       | 0.00  | 0.00  | 0.00  | NaN   |
| 29015 | DKFZp762A22 | 0.00  | 0.00  | 0.00  | NaN   |
| 29018 | PRO1768     | 0.00  | 0.13  | 0.00  | 0.07  |
| 29028 | PRO2000     | 0.27  | 0.25  | 0.05  | 0.59  |
| 29034 | PRO0132     | 0.00  | 0.00  | 0.00  | NaN   |
| 29035 | PRO0149     | 0.00  | 0.00  | 0.00  | NaN   |
| 29053 | PRO0628     | 0.18  | -0.13 | 0.00  | 0.04  |
| 29058 | C20orf30    | 0.00  | 0.00  | 0.00  | NaN   |
| 29062 | HSPC049     | 0.00  | 0.00  | 0.00  | NaN   |
| 29063 | HSPC052     | 0.00  | 0.00  | -0.05 | 0.20  |
| 29065 | HSPC054     | 0.00  | 0.00  | 0.20  | -0.46 |
| 29066 | HSPC055     | 0.00  | 0.00  | 0.00  | NaN   |
| 29068 | HSPC063     | -0.09 | 0.00  | -0.10 | 0.28  |
| 29072 | HYPB        | -0.09 | 0.00  | -0.05 | 0.58  |
| 29074 | MRPL18      | 0.00  | 0.00  | 0.00  | NaN   |
| 29075 | HSPC072     | 0.00  | 0.00  | 0.00  | NaN   |
| 29078 | HSPC125     | 0.00  | 0.00  | 0.00  | NaN   |
| 29079 | HSPC126     | 0.00  | 0.00  | 0.00  | NaN   |
| 29080 | HSPC128     | 0.00  | 0.13  | 0.00  | 0.36  |
| 29081 | HSPC133     | 0.00  | 0.00  | 0.00  | NaN   |
| 29082 | HSPC134     | 0.00  | 0.00  | 0.00  | -0.07 |
| 29083 | HSPC135     | 0.00  | 0.00  | 0.00  | NaN   |
| 29086 | HSPC142     | -0.09 | 0.00  | 0.00  | 0.11  |
| 29087 | HSPC144     | -0.09 | 0.00  | -0.15 | 0.49  |
| 29091 | HSPC156     | 0.00  | 0.00  | 0.00  | NaN   |
| 29092 | HSPC157     | -0.09 | 0.00  | 0.00  | 0.40  |
| 29093 | MRPL22      | 0.00  | 0.00  | 0.00  | NaN   |
| 29094 | HSPC159     | 0.00  | 0.00  | 0.00  | NaN   |
| 29095 | HSPC160     | 0.00  | 0.00  | 0.00  | NaN   |
| 29097 | HSPC163     | 0.09  | 0.00  | 0.00  | 0.29  |
| 29098 | MOG1        | 0.00  | 0.00  | 0.00  | NaN   |
| 29099 | HSPC166     | 0.00  | 0.13  | 0.05  | 0.65  |

|       |             |       |       |       |       |
|-------|-------------|-------|-------|-------|-------|
| 29102 | RNASE3L     | 0.09  | 0.25  | 0.40  | 0.31  |
| 29103 | MCJ         | 0.00  | 0.00  | -0.05 | -0.12 |
| 29104 | N6AMT1      | 0.00  | 0.00  | 0.00  | NaN   |
| 29105 | AF093680    | -0.09 | 0.00  | 0.00  | 0.38  |
| 29107 | NXT1        | 0.00  | 0.00  | 0.00  | NaN   |
| 29108 | ASC         | 0.00  | 0.00  | 0.00  | NaN   |
| 29109 | FHOD1       | -0.09 | 0.00  | 0.00  | 0.20  |
| 29110 | TBK1        | 0.09  | 0.00  | 0.00  | 0.32  |
| 29113 | STG         | 0.00  | 0.00  | 0.00  | NaN   |
| 29114 | NP25        | 0.00  | 0.00  | 0.00  | NaN   |
| 29115 | HCNGP       | 0.18  | 0.13  | 0.00  | 0.49  |
| 29116 | MIR         | 0.00  | 0.00  | 0.00  | NaN   |
| 29117 | BRD7        | -0.09 | 0.00  | -0.05 | 0.62  |
| 29118 | GRTH        | -0.09 | 0.00  | -0.10 | 0.25  |
| 29119 | VR22        | 0.00  | 0.00  | 0.00  | NaN   |
| 29121 | LLT1        | -0.09 | 0.00  | 0.00  | -0.04 |
| 29122 | TSP50       | -0.09 | 0.00  | -0.05 | 0.19  |
| 29123 | LZ16        | -0.09 | -0.13 | -0.05 | 0.22  |
| 29124 | PP13        | 0.00  | 0.00  | 0.00  | NaN   |
| 29125 | C11orf21    | 0.00  | -0.13 | 0.00  | -0.10 |
| 29127 | RACGAP1     | 0.00  | 0.00  | 0.00  | NaN   |
| 29760 | BLNK        | 0.00  | 0.00  | -0.05 | 0.13  |
| 29761 | USP25       | 0.00  | -0.13 | -0.05 | 0.47  |
| 29763 | PACSIN3     | 0.00  | 0.00  | 0.00  | NaN   |
| 29766 | TMOD3       | 0.18  | 0.00  | 0.00  | 0.29  |
| 29767 | TMOD2       | 0.18  | 0.00  | 0.00  | 0.21  |
| 29774 | DKFZP434P21 | 0.00  | 0.00  | 0.00  | NaN   |
| 29775 | CARD10      | -0.09 | 0.00  | 0.10  | 0.02  |
| 29777 | ABT1        | 0.00  | 0.00  | 0.00  | NaN   |
| 29780 | PARVB       | 0.00  | 0.00  | 0.05  | 0.01  |
| 29781 | 384D8-2     | 0.00  | -0.25 | 0.00  | 0.14  |
| 29789 | PTD004      | 0.00  | 0.00  | 0.00  | NaN   |
| 29796 | HSPC051     | -0.09 | 0.00  | 0.00  | 0.30  |
| 29798 | AF038169    | 0.00  | 0.00  | -0.05 | -0.08 |
| 29799 | AF060862    | 0.00  | 0.00  | 0.00  | NaN   |
| 29802 | VPREB3      | 0.00  | 0.00  | 0.05  | -0.03 |
| 29803 | RIP60       | 0.00  | 0.00  | -0.05 | 0.42  |
| 29842 | LBP-9       | 0.00  | 0.00  | 0.00  | NaN   |
| 29844 | TFPT        | 0.09  | 0.00  | 0.00  | -0.16 |
| 29855 | UBN1        | 0.00  | 0.00  | -0.05 | 0.62  |
| 29880 | ALG5        | 0.00  | 0.00  | 0.00  | NaN   |
| 29881 | NPC1L1      | 0.00  | 0.00  | 0.00  | NaN   |
| 29882 | APC2        | 0.00  | 0.13  | 0.00  | -0.02 |
| 29883 | CNOT7       | 0.00  | -0.13 | -0.10 | 0.26  |
| 29887 | SNX10       | 0.00  | 0.13  | 0.00  | -0.10 |
| 29888 | ZIN         | 0.09  | 0.00  | 0.00  | 0.19  |
| 29889 | HUMAUANTIG  | 0.00  | 0.00  | 0.00  | NaN   |

|       |             |       |       |       |       |
|-------|-------------|-------|-------|-------|-------|
| 29890 | HUMAGCGB    | -0.09 | 0.00  | -0.10 | 0.49  |
| 29893 | HUMGT198A   | 0.00  | -0.13 | 0.00  | -0.10 |
| 29894 | CPSF1       | 0.18  | 0.00  | 0.15  | 0.50  |
| 29895 | HUMMLC2B    | 0.00  | 0.00  | 0.00  | NaN   |
| 29896 | HSU53209    | 0.00  | 0.13  | 0.00  | 0.45  |
| 29899 | HSU54999    | 0.09  | 0.00  | 0.05  | 0.37  |
| 29901 | HSU79266    | 0.00  | 0.00  | 0.00  | NaN   |
| 29902 | HSU79274    | 0.00  | 0.00  | 0.00  | NaN   |
| 29903 | HSU79303    | 1.00  | 1.00  | 0.00  | 0.32  |
| 29906 | SIAT8E      | -0.09 | -0.13 | -0.20 | -0.04 |
| 29907 | SNX15       | 0.00  | 0.00  | 0.00  | NaN   |
| 29909 | H963        | 0.00  | 0.00  | 0.00  | NaN   |
| 29911 | HOOK2       | 0.00  | 0.00  | 0.00  | NaN   |
| 29914 | TERE1       | 0.00  | 0.00  | 0.00  | NaN   |
| 29915 | HCF-2       | 0.00  | 0.00  | 0.00  | NaN   |
| 29916 | SNX11       | 0.00  | 0.00  | 0.00  | 0.27  |
| 29919 | MIC1        | 0.00  | 0.00  | -0.15 | 0.45  |
| 29922 | NME7        | 0.00  | 0.00  | -0.05 | 0.44  |
| 29923 | HIG2        | 0.00  | 0.25  | 0.00  | 0.43  |
| 29924 | EPSIN       | 0.09  | 0.13  | 0.00  | 0.33  |
| 29925 | GMPPB       | -0.09 | 0.00  | -0.05 | 0.23  |
| 29926 | GMPPA       | 0.00  | 0.00  | 0.00  | NaN   |
| 29927 | SEC61A1     | 0.00  | 0.00  | 0.00  | NaN   |
| 29928 | TIMM22      | 0.00  | -0.13 | 0.00  | 0.06  |
| 29929 | ALG6        | 0.00  | 0.00  | 0.00  | NaN   |
| 29930 | PCDHB1      | 0.00  | 0.00  | 0.00  | NaN   |
| 29931 | NAG-7       | 0.00  | 0.00  | 0.00  | NaN   |
| 29933 | G2A         | -0.09 | 0.00  | 0.00  | -0.01 |
| 29937 | SPUF        | 0.00  | 0.00  | 0.00  | NaN   |
| 29940 | SART-2      | -0.09 | 0.00  | 0.05  | 0.16  |
| 29942 | PURG        | -0.09 | -0.25 | -0.05 | -0.08 |
| 29943 | PADI1       | -0.09 | 0.00  | 0.00  | -0.32 |
| 29946 | RBT1        | 0.00  | 0.00  | 0.00  | NaN   |
| 29947 | DNMT3L      | 0.00  | 0.00  | 0.00  | NaN   |
| 29948 | OKL38       | -0.09 | -0.13 | -0.05 | 0.01  |
| 29949 | IL19        | 0.00  | 0.13  | 0.00  | -0.05 |
| 29953 | TRHDE       | 0.09  | 0.00  | 0.00  | 0.28  |
| 29954 | POMT2       | 0.00  | 0.00  | 0.00  | NaN   |
| 29956 | LASS2       | 0.00  | 0.00  | 0.05  | 0.26  |
| 29957 | DKFZp586G01 | 0.09  | 0.00  | 0.00  | 0.18  |
| 29959 | NRBP        | 0.09  | 0.00  | 0.05  | 0.65  |
| 29960 | FTSJ2       | 0.00  | 0.13  | 0.05  | 0.54  |
| 29964 | OBTP        | 0.00  | 0.00  | 1.00  | 0.18  |
| 29965 | C16orf5     | 0.00  | 0.00  | -0.05 | 0.21  |
| 29966 | GS2NA       | 0.00  | 0.00  | 0.00  | NaN   |
| 29967 | ST7         | 0.18  | -0.25 | 0.05  | 0.06  |
| 29968 | PSA         | 0.00  | 0.00  | -0.05 | -0.30 |



|       |             |       |       |       |       |
|-------|-------------|-------|-------|-------|-------|
| 29970 | SCHIP1      | 0.00  | 0.00  | 0.00  | NaN   |
| 29974 | ACF         | 0.00  | 0.00  | 0.05  | 0.32  |
| 29980 | DONSON      | 0.00  | 0.00  | 0.00  | NaN   |
| 29982 | NRBF-2      | 0.00  | 0.00  | 0.00  | NaN   |
| 29984 | ARHD        | 0.18  | 0.00  | 0.05  | 0.36  |
| 29986 | SLC39A2     | 0.00  | 0.00  | 0.00  | NaN   |
| 29988 | SLC2A8      | 0.00  | 0.00  | -0.05 | 0.64  |
| 29989 | OBP2B       | 0.00  | 0.00  | 0.00  | NaN   |
| 29990 | PILR(BETA)  | 0.18  | 0.00  | 0.00  | 0.24  |
| 29991 | OBP2A       | 0.00  | 0.00  | 0.10  | -0.08 |
| 29992 | PILR(ALPHA) | 0.18  | 0.00  | 0.00  | 0.18  |
| 29994 | BAZ2B       | 0.00  | 0.00  | -0.05 | 0.15  |
| 29995 | LMCD1       | 0.00  | 0.00  | 0.00  | NaN   |
| 29997 | GLTSCR2     | 0.09  | 0.00  | 0.00  | 0.32  |
| 29998 | GLTSCR1     | 0.09  | 0.00  | 0.00  | 0.20  |
| 29999 | FSCN3       | 0.00  | 0.25  | 0.00  | 0.12  |
| 30000 | TRN2        | 0.00  | 0.00  | 0.00  | NaN   |
| 30001 | ERO1L       | 0.00  | 0.25  | 0.05  | -0.16 |
| 30008 | EFEMP2      | -0.09 | 0.00  | 0.05  | 0.29  |
| 30009 | TBX21       | 0.00  | -0.13 | 0.00  | -0.08 |
| 30012 | HOX11L2     | 0.00  | 0.00  | 0.00  | NaN   |
| 30811 | HUNK        | 0.00  | 0.00  | 0.00  | NaN   |
| 30813 | VSX1        | 0.00  | 0.00  | -0.05 | 0.01  |
| 30814 | PLA2G2E     | -0.09 | 0.00  | 0.00  | -0.11 |
| 30817 | EMR2        | 0.00  | 0.00  | 0.00  | NaN   |
| 30819 | KCNIP2      | 0.00  | -0.13 | -0.05 | -0.18 |
| 30820 | KCNIP1      | 0.00  | 0.00  | 0.00  | NaN   |
| 30827 | CGBP        | -0.09 | -0.13 | -0.25 | 0.42  |
| 30835 | CD209       | 0.00  | 0.00  | 0.00  | NaN   |
| 30836 | HSU15552    | 0.09  | 0.00  | 0.00  | 0.51  |
| 30837 | NAP4        | 0.00  | 0.25  | 0.00  | 0.34  |
| 30844 | EHD4        | 0.00  | 0.00  | 0.00  | NaN   |
| 30845 | EHD3        | 0.00  | 0.00  | 0.00  | NaN   |
| 30846 | EHD2        | 0.09  | 0.00  | 0.00  | 0.23  |
| 30849 | PIK3R4      | 0.00  | 0.00  | 0.00  | NaN   |
| 30850 | HUMPPA      | 0.00  | 0.13  | 0.00  | 0.32  |
| 30851 | TIP-1       | 0.00  | 0.00  | 0.00  | NaN   |
| 43847 | KLK14       | 0.00  | 0.00  | 0.00  | NaN   |
| 49856 | WDR8        | 0.00  | 0.00  | 0.00  | NaN   |
| 49860 | C1orf10     | 0.00  | 0.00  | 0.05  | -0.13 |
| 50485 | SMARCAL1    | 0.00  | 0.00  | 0.00  | NaN   |
| 50486 | GOS2        | 0.00  | 0.00  | 0.00  | NaN   |
| 50487 | PLA2G3      | 0.00  | 0.00  | 0.00  | NaN   |
| 50488 | MINK        | 0.00  | 0.00  | 0.00  | NaN   |
| 50489 | LANGERIN    | 0.00  | 0.00  | 0.05  | 0.28  |
| 50506 | DUOX2       | 0.00  | 0.00  | 0.00  | NaN   |
| 50507 | NOX4        | 0.00  | 0.00  | 0.00  | NaN   |

|       |          |       |       |       |       |
|-------|----------|-------|-------|-------|-------|
| 50508 | NOX3     | 0.00  | 0.00  | 0.00  | NaN   |
| 50509 | COL5A3   | 0.00  | 0.00  | 0.05  | -0.06 |
| 50512 | PODLX2   | 0.00  | 0.00  | 0.00  | NaN   |
| 50515 | C4ST     | 0.00  | 0.00  | 0.00  | NaN   |
| 50613 | UBQLN3   | 0.00  | -0.13 | -0.05 | -0.09 |
| 50615 | IL21R    | 0.00  | 0.00  | 0.00  | NaN   |
| 50616 | IL22     | 0.50  | 0.00  | 0.00  | 0.24  |
| 50617 | ATP6V0A4 | 0.00  | 0.00  | 0.00  | NaN   |
| 50618 | ITSN2    | 0.09  | 0.00  | -0.05 | 0.55  |
| 50624 | ERG-1    | 0.09  | 0.00  | -0.05 | 0.45  |
| 50626 | CYHR1    | 0.18  | 0.00  | 0.10  | 0.33  |
| 50632 | CALCYON  | 0.00  | 0.00  | -0.10 | 0.13  |
| 50649 | ARHGEF4  | 0.00  | 0.00  | -0.05 | 0.14  |
| 50650 | ARHGEF3  | 0.00  | 0.00  | -0.10 | 0.09  |
| 50674 | NEUROG3  | 0.00  | 0.00  | 0.00  | NaN   |
| 50700 | RDH8     | 0.00  | 0.00  | 0.05  | -0.09 |
| 50717 | H326     | 0.00  | 0.00  | 0.00  | NaN   |
| 50801 | KCNK4    | 0.00  | 0.00  | 0.00  | NaN   |
| 50804 | MEF-2    | 0.00  | 0.00  | 0.00  | NaN   |
| 50805 | IRX4     | 0.00  | 0.13  | 0.10  | -0.22 |
| 50807 | DDEF1    | 0.00  | 0.00  | 0.20  | 0.28  |
| 50809 | HP1-BP74 | -0.09 | 0.00  | -0.05 | 0.09  |
| 50810 | CGI-142  | 0.00  | 0.00  | 0.00  | 0.19  |
| 50813 | COPS7A   | -0.09 | 0.00  | 0.00  | 0.25  |
| 50831 | TAS2R3   | 0.00  | 0.00  | 0.05  | 0.14  |
| 50832 | TAS2R4   | 0.00  | 0.00  | 0.00  | NaN   |
| 50833 | TAS2R16  | 0.00  | 0.13  | 0.00  | 0.08  |
| 50834 | TAS2R1   | 0.00  | 0.00  | 0.10  | -0.16 |
| 50835 | TAS2R9   | -0.09 | 0.00  | 0.00  | 0.03  |
| 50836 | TAS2R8   | -0.09 | 0.00  | 0.00  | -0.02 |
| 50837 | TAS2R7   | -0.09 | 0.00  | 0.00  | 0.05  |
| 50838 | TAS2R13  | -0.09 | 0.00  | 0.00  | 0.33  |
| 50839 | TAS2R10  | -0.09 | 0.00  | 0.00  | 0.16  |
| 50840 | TAS2R14  | -0.09 | 0.00  | 0.00  | -0.06 |
| 50848 | JAM1     | 0.00  | 0.00  | 0.00  | NaN   |
| 50852 | TRIM     | 0.00  | 0.00  | 0.00  | NaN   |
| 50853 | VILL     | 0.00  | 0.25  | 0.00  | -0.04 |
| 50855 | PARD6A   | -0.09 | -0.13 | 0.00  | -0.02 |
| 50856 | CLECSF6  | -0.09 | 0.00  | 0.00  | 0.00  |
| 50859 | HSAJ1454 | 0.00  | 0.00  | 0.00  | NaN   |
| 50861 | STMN3    | 0.09  | 0.00  | 0.00  | -0.15 |
| 50862 | ZFP26    | 0.00  | 0.00  | 0.00  | NaN   |
| 50863 | HNT      | -0.09 | 0.00  | -0.10 | 0.10  |
| 50865 | HEBP1    | -0.09 | 0.00  | 0.00  | 0.29  |
| 50937 | CDON     | -0.09 | 0.00  | -0.10 | -0.11 |
| 50939 | IMPG2    | 0.00  | 0.00  | 0.00  | NaN   |
| 50940 | PDE11A   | 0.00  | 0.00  | 0.00  | NaN   |

|       |          |       |       |       |       |
|-------|----------|-------|-------|-------|-------|
| 50944 | SHANK1   | 0.00  | 0.00  | 0.00  | NaN   |
| 50999 | LOC50999 | 0.00  | 0.00  | 0.05  | 0.30  |
| 51001 | LOC51001 | 0.00  | -0.13 | 0.05  | 0.56  |
| 51002 | LOC51002 | 0.00  | 0.00  | 0.00  | NaN   |
| 51003 | LOC51003 | 0.00  | 0.00  | 0.00  | NaN   |
| 51004 | LOC51004 | 0.00  | 0.00  | 0.00  | NaN   |
| 51005 | LOC51005 | 0.00  | 0.00  | 0.00  | NaN   |
| 51006 | OVCOV1   | 0.00  | 0.00  | 0.00  | NaN   |
| 51008 | LOC51008 | 0.09  | 0.00  | 0.00  | 0.26  |
| 51009 | F-LAN-1  | 0.00  | -0.13 | 0.00  | 0.13  |
| 51011 | LOC51011 | 0.00  | 0.00  | 0.00  | NaN   |
| 51012 | C20orf45 | 0.18  | 0.25  | 0.00  | 0.47  |
| 51013 | CSL4     | 0.00  | 0.00  | -0.05 | 0.03  |
| 51014 | LOC51014 | 0.00  | 0.13  | 0.00  | 0.57  |
| 51015 | LOC51015 | 0.00  | 0.00  | 0.00  | NaN   |
| 51016 | LOC51016 | 0.00  | 0.00  | 0.00  | NaN   |
| 51018 | LOC51018 | 0.09  | 0.00  | 0.00  | -0.07 |
| 51019 | LOC51019 | 0.00  | 0.00  | 0.00  | NaN   |
| 51020 | LOC51020 | 0.00  | 0.00  | 0.00  | NaN   |
| 51021 | MRPS16   | 0.09  | 0.00  | 0.00  | 0.43  |
| 51022 | GLRX2    | 0.09  | 0.00  | 0.00  | 0.32  |
| 51023 | MRPS18C  | 0.00  | 0.00  | 0.00  | NaN   |
| 51024 | LOC51024 | 0.18  | 0.00  | 0.00  | 0.56  |
| 51025 | Magmas   | 0.00  | 0.00  | 0.00  | NaN   |
| 51026 | LOC51026 | 0.00  | 0.00  | 0.00  | NaN   |
| 51027 | LOC51027 | 0.00  | 0.00  | 0.05  | 0.27  |
| 51029 | LOC51029 | 0.00  | 0.13  | 0.00  | 0.15  |
| 51030 | LOC51030 | 0.00  | 0.00  | 0.00  | NaN   |
| 51031 | LOC51031 | 0.00  | -0.13 | 0.00  | -0.08 |
| 51032 | LOC51032 | 0.00  | 0.00  | 0.00  | NaN   |
| 51035 | LOC51035 | 0.00  | 0.00  | 0.00  | NaN   |
| 51042 | LOC51042 | 0.00  | 0.00  | 0.00  | NaN   |
| 51043 | ZFP67    | 0.09  | 0.13  | 0.00  | 0.06  |
| 51046 | SIAT8C   | -0.09 | 0.00  | -0.20 | 0.22  |
| 51050 | PI15     | 0.00  | 0.25  | 0.00  | -0.10 |
| 51052 | LOC51052 | 0.00  | 0.00  | -0.05 | 0.08  |
| 51053 | LOC51053 | 0.00  | 0.00  | 0.05  | 0.15  |
| 51054 | LOC51054 | 0.00  | 0.13  | -0.05 | 0.37  |
| 51063 | LOC51063 | 0.00  | -0.13 | -0.05 | 0.13  |
| 51065 | RPS27L   | 0.00  | 0.00  | 0.00  | NaN   |
| 51066 | LOC51066 | 0.00  | 0.00  | 0.00  | NaN   |
| 51067 | LOC51067 | 0.00  | 0.00  | 0.00  | NaN   |
| 51068 | LOC51068 | 0.00  | 0.00  | 0.00  | NaN   |
| 51069 | MRPL2    | 0.00  | 0.00  | 0.00  | NaN   |
| 51070 | NOSIP    | 0.00  | 0.00  | 0.00  | NaN   |
| 51071 | LOC51071 | 0.00  | 0.00  | 0.00  | NaN   |
| 51073 | MRPL4    | 0.00  | 0.00  | 0.05  | 0.45  |

|       |          |       |       |       |       |
|-------|----------|-------|-------|-------|-------|
| 51074 | LOC51074 | 0.00  | 0.13  | 0.05  | 0.39  |
| 51075 | LOC51075 | 0.00  | 0.00  | 0.00  | NaN   |
| 51076 | LOC51076 | 0.00  | -0.13 | -0.05 | 0.30  |
| 51077 | LOC51077 | 0.00  | 0.00  | 0.00  | NaN   |
| 51078 | LOC51078 | 0.00  | 0.00  | -0.05 | 0.41  |
| 51079 | GRIM19   | 0.00  | 0.00  | 0.00  | NaN   |
| 51081 | MRPS7    | 0.00  | 0.13  | 0.00  | 0.32  |
| 51082 | LOC51082 | 0.00  | 0.00  | -0.05 | 0.22  |
| 51083 | LOC51083 | 0.45  | 0.00  | 0.00  | -0.24 |
| 51084 | CRYL1    | 0.00  | 0.00  | -0.10 | 0.20  |
| 51086 | LOC51086 | 0.00  | 0.00  | 0.00  | NaN   |
| 51087 | LOC51087 | 0.00  | 0.00  | 0.00  | NaN   |
| 51088 | LOC51088 | 0.00  | 0.00  | 0.05  | -0.20 |
| 51090 | PMLP     | -0.09 | 0.00  | 0.00  | -0.28 |
| 51092 | LOC51092 | -0.09 | 0.00  | 0.00  | 0.21  |
| 51093 | LOC51093 | 0.00  | 0.13  | 0.00  | 0.00  |
| 51094 | LOC51094 | 0.00  | 0.13  | 0.00  | 0.29  |
| 51096 | LOC51096 | 0.00  | 0.13  | 0.00  | 0.25  |
| 51097 | LOC51097 | 0.00  | 0.00  | 0.00  | NaN   |
| 51098 | C20orf9  | 0.09  | -0.13 | 0.00  | 0.57  |
| 51099 | CGI-58   | 0.00  | 0.00  | -0.05 | 0.28  |
| 51100 | SH3GLB1  | 0.00  | 0.00  | 0.10  | 0.55  |
| 51101 | LOC51101 | 0.00  | 0.25  | 0.05  | 0.68  |
| 51102 | LOC51102 | 0.00  | 0.00  | 0.00  | NaN   |
| 51103 | LOC51103 | 0.00  | 0.00  | 0.00  | NaN   |
| 51104 | LOC51104 | 0.00  | 0.00  | -0.05 | 0.11  |
| 51105 | CGI-72   | 0.00  | 0.00  | 0.05  | 0.26  |
| 51106 | TFB1M    | 0.00  | 0.00  | 0.00  | NaN   |
| 51107 | LOC51107 | 0.00  | 0.13  | 0.05  | 0.52  |
| 51108 | DREV1    | 0.00  | 0.00  | 0.00  | NaN   |
| 51109 | ARSDR1   | 0.00  | 0.00  | 0.00  | NaN   |
| 51110 | LOC51110 | 0.00  | 0.25  | 0.00  | 0.71  |
| 51112 | LOC51112 | 0.00  | 0.00  | 0.00  | NaN   |
| 51115 | LOC51115 | 0.18  | 0.25  | 0.00  | 0.45  |
| 51116 | MRPS2    | 0.00  | 0.00  | 0.00  | NaN   |
| 51117 | COQ4     | 0.00  | 0.00  | 0.00  | NaN   |
| 51118 | CGI-94   | 0.00  | 0.00  | 0.00  | NaN   |
| 51121 | RPL26L1  | 0.00  | 0.00  | 0.00  | NaN   |
| 51123 | LOC51123 | 0.18  | 0.00  | 0.00  | 0.15  |
| 51125 | LOC51125 | 0.45  | -0.25 | -0.05 | 0.78  |
| 51127 | TRIM17   | 0.09  | 0.00  | 0.00  | -0.09 |
| 51128 | LOC51128 | 0.00  | -0.13 | 0.00  | 0.40  |
| 51129 | ANGPTL4  | 0.00  | 0.00  | 0.00  | NaN   |
| 51131 | LOC51131 | 0.00  | 0.13  | 0.00  | 0.31  |
| 51133 | LOC51133 | 0.09  | 0.00  | 0.00  | 0.31  |
| 51134 | LOC51134 | 0.00  | 0.00  | 0.00  | NaN   |
| 51135 | IRAK4    | 0.00  | 0.13  | 0.00  | 0.50  |

|       |           |       |       |       |       |
|-------|-----------|-------|-------|-------|-------|
| 51136 | LOC51136  | 0.18  | 0.13  | 0.00  | 0.45  |
| 51138 | COPS4     | 0.00  | 0.00  | 0.00  | NaN   |
| 51142 | LOC51142  | 0.00  | 0.00  | 0.10  | 0.59  |
| 51143 | LOC51143  | 0.00  | -0.13 | 0.00  | 0.36  |
| 51144 | HSD17B12  | 0.00  | 0.00  | 0.00  | NaN   |
| 51146 | LOC51146  | 0.00  | 0.00  | 0.00  | NaN   |
| 51147 | ING4      | -0.09 | 0.00  | 0.00  | 0.12  |
| 51149 | LOC51149  | 0.00  | 0.00  | 0.00  | NaN   |
| 51150 | Cab45     | 0.00  | 0.00  | 0.00  | NaN   |
| 51151 | MATP      | 0.00  | 0.00  | 0.10  | 0.05  |
| 51154 | C1orf33   | -0.09 | 0.00  | 0.00  | 0.20  |
| 51155 | HN1       | 0.00  | 0.13  | 0.00  | 0.00  |
| 51156 | SERPINA10 | 0.00  | 0.00  | 0.00  | NaN   |
| 51157 | LOC51157  | 0.09  | 0.13  | 0.00  | 0.28  |
| 51160 | VPS28     | 0.18  | 0.00  | 0.15  | 0.42  |
| 51161 | LOC51161  | -0.09 | 0.00  | -0.05 | 0.11  |
| 51162 | LOC51162  | 0.00  | 0.00  | 0.00  | NaN   |
| 51163 | DBR1      | 0.00  | 0.00  | 0.00  | NaN   |
| 51164 | DCTN4     | 0.00  | 0.00  | 0.00  | NaN   |
| 51167 | b5&b5R    | 0.00  | 0.00  | 0.00  | NaN   |
| 51168 | MYO15A    | 0.00  | 0.00  | 0.00  | NaN   |
| 51170 | LOC51170  | 0.00  | 0.00  | 0.00  | NaN   |
| 51171 | LOC51171  | 0.09  | 0.00  | 0.00  | -0.11 |
| 51172 | LOC51172  | 0.00  | 0.00  | 0.00  | NaN   |
| 51174 | LOC51174  | 0.18  | 0.13  | 0.00  | 0.80  |
| 51176 | LEF1      | 0.00  | 0.00  | 0.00  | NaN   |
| 51177 | LOC51177  | 0.00  | 0.00  | 0.05  | 0.76  |
| 51179 | HAO2      | 0.09  | 0.00  | 0.05  | 0.28  |
| 51181 | DCXR      | 0.00  | 0.00  | 0.00  | NaN   |
| 51182 | LOC51182  | 0.00  | 0.00  | 0.00  | NaN   |
| 51184 | LOC51184  | 0.00  | 0.00  | 0.00  | NaN   |
| 51185 | LOC51185  | 0.00  | -0.13 | 0.00  | 0.31  |
| 51187 | C15orf15  | 0.00  | 0.00  | 0.05  | 0.27  |
| 51188 | SS18L2    | 0.00  | 0.00  | -0.05 | 0.29  |
| 51191 | LOC51191  | 0.00  | 0.00  | 0.00  | NaN   |
| 51193 | LOC51193  | 0.09  | 0.00  | 0.05  | 0.34  |
| 51195 | LOC51195  | 0.00  | 0.38  | 0.00  | 0.54  |
| 51196 | PLCE1     | 0.00  | 0.00  | 0.00  | NaN   |
| 51198 | LOC51198  | -0.18 | -0.13 | -0.25 | -0.08 |
| 51199 | NIN       | 0.00  | 0.00  | 0.05  | 0.14  |
| 51200 | CPA4      | 0.00  | 0.25  | 0.05  | 0.10  |
| 51202 | LOC51202  | -0.09 | 0.00  | 0.00  | 0.40  |
| 51203 | ANKT      | 0.00  | 0.00  | 0.00  | NaN   |
| 51204 | LOC51204  | 0.27  | 0.13  | 0.00  | 0.66  |
| 51205 | LOC51205  | 0.00  | 0.00  | 0.05  | 0.10  |
| 51206 | GP6       | 0.09  | 0.00  | 0.00  | -0.14 |
| 51207 | LOC51207  | 0.09  | 0.00  | 0.00  | 0.12  |

|       |           |       |       |       |       |
|-------|-----------|-------|-------|-------|-------|
| 51208 | CLDN18    | 0.00  | 0.00  | 0.00  | NaN   |
| 51214 | IGF2AS    | 0.00  | -0.13 | 0.00  | 0.04  |
| 51218 | LOC51218  | 0.00  | 0.00  | 0.00  | NaN   |
| 51222 | ZNF219    | 0.00  | 0.00  | 0.00  | NaN   |
| 51224 | TCEB3L    | -0.09 | -0.13 | -0.15 | -0.09 |
| 51226 | LOC51226  | 0.00  | 0.00  | 0.00  | 0.11  |
| 51227 | DSCR5     | 0.00  | 0.00  | 0.00  | NaN   |
| 51230 | C20orf104 | 0.00  | 0.00  | 0.00  | NaN   |
| 51231 | LOC51231  | 0.00  | 0.00  | 0.00  | NaN   |
| 51232 | CRIM1     | 0.00  | 0.00  | 0.00  | NaN   |
| 51233 | LOC51233  | 0.00  | 0.00  | 0.05  | 0.14  |
| 51236 | LOC51236  | 0.18  | 0.00  | 0.10  | 0.36  |
| 51237 | FLJ32987  | 0.00  | 0.00  | 0.00  | NaN   |
| 51241 | LOC51241  | 0.00  | 0.00  | 0.00  | NaN   |
| 51265 | CDKL3     | 0.00  | -0.13 | 0.00  | 0.07  |
| 51266 | LOC51266  | -0.09 | 0.00  | 0.00  | -0.04 |
| 51267 | LOC51267  | -0.09 | 0.00  | 0.00  | -0.02 |
| 51268 | PIPOX     | 0.00  | 0.38  | 0.00  | 0.46  |
| 51271 | UBAP      | -0.09 | 0.13  | 0.10  | 0.76  |
| 51272 | LOC51272  | -0.27 | -0.13 | -0.15 | 0.40  |
| 51274 | KLF3      | 0.00  | 0.00  | 0.05  | 0.01  |
| 51275 | LOC51275  | 0.00  | 0.00  | 0.00  | NaN   |
| 51276 | HSPC059   | 0.00  | 0.13  | 0.00  | -0.03 |
| 51278 | IER5      | 0.00  | 0.00  | 0.05  | 0.02  |
| 51279 | LOC51279  | 0.00  | 0.00  | 0.00  | 0.23  |
| 51280 | GOLPH2    | 0.00  | 0.00  | 0.00  | NaN   |
| 51281 | FLJ20499  | 0.00  | 0.00  | -0.05 | 0.21  |
| 51282 | SCAND1    | 0.00  | 0.00  | 0.00  | NaN   |
| 51283 | LOC51283  | 0.00  | 0.00  | 0.00  | NaN   |
| 51285 | LOC51285  | 0.00  | 0.00  | 0.00  | NaN   |
| 51286 | BM88      | -0.18 | -0.13 | -0.05 | 0.09  |
| 51287 | E2IG2     | 0.09  | 0.13  | 0.00  | 0.32  |
| 51289 | LOC51289  | 0.00  | 0.00  | 0.10  | -0.16 |
| 51290 | LOC51290  | 0.00  | 0.00  | 0.00  | NaN   |
| 51291 | LOC51291  | 0.00  | 0.00  | 0.00  | NaN   |
| 51292 | LOC51292  | 0.00  | 0.00  | 0.00  | NaN   |
| 51293 | 8D6A      | 0.00  | 0.13  | 0.00  | -0.19 |
| 51294 | PCDH12    | 0.00  | 0.00  | 0.00  | NaN   |
| 51295 | LOC51295  | 0.00  | 0.00  | 0.00  | NaN   |
| 51296 | PHT2      | 0.00  | 0.00  | 0.00  | NaN   |
| 51297 | PLUNC     | 0.00  | 0.00  | 0.00  | NaN   |
| 51298 | THEG      | 0.00  | 0.00  | -0.05 | 0.03  |
| 51299 | LOC51299  | 0.00  | 0.00  | 0.00  | NaN   |
| 51301 | LOC51301  | 0.00  | 0.00  | 0.00  | NaN   |
| 51302 | CYP39A1   | 0.00  | 0.00  | 0.00  | NaN   |
| 51303 | LOC51303  | 0.00  | 0.00  | 0.00  | NaN   |
| 51304 | ZDHHC3    | -0.09 | 0.00  | -0.05 | 0.28  |

|       |             |       |       |       |       |
|-------|-------------|-------|-------|-------|-------|
| 51306 | C5orf5      | 0.00  | -0.13 | 0.00  | 0.28  |
| 51307 | C5orf6      | 0.00  | 0.00  | 0.00  | NaN   |
| 51308 | LOC51308    | 0.00  | 0.00  | 0.00  | NaN   |
| 51310 | LOC51310    | 0.00  | 0.00  | 0.00  | NaN   |
| 51312 | LOC51312    | -0.09 | -0.25 | -0.15 | 0.23  |
| 51313 | LOC51313    | 0.00  | 0.00  | 0.00  | 0.05  |
| 51314 | LOC51314    | 0.00  | 0.00  | 0.00  | NaN   |
| 51315 | LOC51315    | 0.00  | 0.00  | -0.05 | 0.34  |
| 51317 | BHC80       | 0.00  | 0.00  | 0.00  | NaN   |
| 51318 | MRPL35      | 0.00  | 0.00  | -0.05 | 0.06  |
| 51319 | LOC51319    | 0.00  | 0.00  | 0.00  | NaN   |
| 51320 | LOC51320    | -0.09 | -0.13 | -0.20 | 0.39  |
| 51321 | LOC51321    | 0.18  | 0.38  | 0.00  | 0.32  |
| 51322 | WAC         | -0.09 | 0.00  | 0.05  | 0.37  |
| 51324 | ACP33       | 0.00  | 0.00  | 0.00  | NaN   |
| 51327 | ERAF        | 0.00  | 0.00  | 0.00  | NaN   |
| 51329 | LOC51329    | 0.00  | 0.00  | 0.00  | NaN   |
| 51330 | FN14        | 0.00  | 0.00  | 0.00  | NaN   |
| 51332 | SPTBN5      | 0.00  | 0.00  | 0.00  | NaN   |
| 51333 | LOC51333    | 0.00  | 0.00  | 0.00  | NaN   |
| 51334 | LOC51334    | 0.00  | 0.00  | 0.00  | NaN   |
| 51335 | NEUGRIN     | 0.00  | 0.00  | 0.00  | NaN   |
| 51337 | LOC51337    | 0.18  | 0.13  | 0.05  | 0.20  |
| 51338 | MS4A4A      | 0.00  | 0.00  | 0.00  | NaN   |
| 51339 | LOC51339    | 0.00  | 0.00  | 0.00  | NaN   |
| 51340 | CRNKL1      | 0.00  | 0.00  | 0.00  | NaN   |
| 51341 | FBI1        | 0.00  | 0.00  | 0.05  | 0.04  |
| 51343 | FZR1        | 0.00  | 0.00  | 0.00  | NaN   |
| 51347 | JIK         | -0.09 | -0.13 | 0.00  | 0.18  |
| 51348 | KLRF1       | -0.09 | 0.00  | 0.00  | -0.07 |
| 51350 | HUMCYT2A    | 0.00  | 0.00  | 0.00  | NaN   |
| 51351 | H-plk       | 0.00  | 0.00  | 0.00  | -0.20 |
| 51352 | WIT-1       | 0.00  | 0.00  | 0.00  | NaN   |
| 51361 | HOOK1       | 0.00  | 0.00  | -0.05 | 0.09  |
| 51362 | PRP17       | 0.00  | 0.00  | 0.05  | 0.35  |
| 51363 | GALNAC4S-6S | 0.00  | 0.00  | -0.05 | 0.09  |
| 51364 | BLu         | -0.09 | 0.00  | -0.05 | -0.09 |
| 51365 | PS-PLA1     | 0.00  | 0.00  | 0.00  | NaN   |
| 51366 | DD5         | 0.18  | 0.00  | 0.00  | 0.31  |
| 51367 | POP5        | 0.00  | -0.13 | 0.00  | 0.31  |
| 51368 | SIG11       | -0.09 | 0.00  | -0.10 | 0.45  |
| 51371 | HSPC014     | 0.00  | 0.00  | -0.05 | 0.05  |
| 51372 | HSPC016     | -0.09 | 0.00  | -0.05 | 0.28  |
| 51373 | MRPS17      | 0.00  | 0.00  | 0.10  | 0.55  |
| 51374 | 4/3/2010    | 0.09  | 0.00  | 0.05  | 0.57  |
| 51375 | SNX7        | 0.00  | 0.00  | 0.00  | NaN   |
| 51377 | UCH37       | 0.09  | 0.00  | 0.00  | 0.32  |

|       |          |       |       |       |       |
|-------|----------|-------|-------|-------|-------|
| 51378 | ANGPT4   | 0.00  | 0.00  | 0.00  | NaN   |
| 51379 | CRLF3    | 0.00  | 0.13  | 0.00  | 0.29  |
| 51380 | CSAD     | 0.00  | 0.00  | 0.00  | NaN   |
| 51382 | ATP6V1D  | 0.00  | 0.00  | 0.05  | 0.32  |
| 51384 | WNT16    | 0.00  | 0.13  | 0.00  | 0.11  |
| 51385 | SZF1     | -0.09 | 0.00  | -0.05 | 0.17  |
| 51386 | EIF3S6IP | -0.09 | 0.00  | 0.05  | 0.33  |
| 51388 | HSPC031  | 0.00  | -0.13 | 0.05  | 0.26  |
| 51397 | PTD002   | 0.00  | 0.13  | 0.00  | 0.47  |
| 51398 | PTD008   | 0.00  | 0.00  | 0.05  | -0.04 |
| 51399 | PTD009   | 0.00  | 0.00  | 0.00  | NaN   |
| 51400 | PME-1    | 0.09  | 0.00  | 0.00  | 0.43  |
| 51406 | RARG-1   | 0.00  | 0.00  | 0.10  | 0.52  |
| 51409 | HEMK     | -0.09 | 0.00  | -0.05 | 0.28  |
| 51411 | BIN2     | 0.00  | 0.00  | 0.00  | NaN   |
| 51412 | ACTL6    | 0.18  | 0.00  | 0.00  | 0.15  |
| 51421 | AMOTL2   | 0.00  | 0.00  | 0.00  | NaN   |
| 51422 | PRKAG2   | 0.00  | 0.00  | -0.05 | 0.03  |
| 51427 | ZFD25    | -0.09 | 0.00  | 0.00  | 0.17  |
| 51428 | ABS      | 0.00  | 0.00  | 0.00  | NaN   |
| 51430 | C1orf9   | 0.00  | 0.00  | 0.00  | NaN   |
| 51433 | ANAPC5   | 0.00  | -0.13 | 0.00  | 0.28  |
| 51435 | CSR1     | -0.09 | -0.25 | -0.10 | 0.27  |
| 51439 | FAM8A1   | 0.00  | 0.00  | 0.00  | NaN   |
| 51440 | HPCAL4   | 0.00  | 0.00  | 0.00  | NaN   |
| 51441 | HGRG8    | 0.00  | 0.00  | 0.00  | NaN   |
| 51444 | STRIN    | 0.00  | 0.00  | -0.15 | 0.38  |
| 51447 | IHPK2    | -0.09 | 0.00  | -0.05 | 0.35  |
| 51449 | PCL1     | 0.00  | 0.00  | 0.00  | NaN   |
| 51450 | PRX2     | 0.00  | 0.00  | 0.00  | NaN   |
| 51451 | LCMT     | 0.00  | 0.00  | 0.00  | NaN   |
| 51454 | CED-6    | 0.00  | 0.00  | 0.00  | NaN   |
| 51455 | REV1L    | 0.00  | 0.00  | 0.00  | NaN   |
| 51458 | RHCG     | 0.00  | 0.00  | -0.05 | 0.01  |
| 51463 | SH120    | 0.00  | 0.00  | 0.05  | 0.39  |
| 51465 | NCUBE1   | 0.00  | 0.00  | 0.00  | NaN   |
| 51466 | RNB6     | 0.00  | 0.00  | 0.00  | NaN   |
| 51471 | CML2     | 0.00  | 0.00  | 0.00  | NaN   |
| 51474 | EPLIN    | 0.00  | 0.00  | 0.00  | NaN   |
| 51475 | CABP2    | 0.27  | 0.00  | 0.05  | 0.12  |
| 51477 | ISYNA1   | 0.00  | 0.00  | 0.00  | NaN   |
| 51478 | HSD17B7  | 0.00  | 0.00  | 0.00  | NaN   |
| 51479 | ANKHZN   | 0.00  | 0.00  | 0.00  | NaN   |
| 51490 | HSPC109  | 0.00  | 0.00  | 0.00  | NaN   |
| 51491 | HSPC111  | 0.00  | 0.00  | 0.00  | NaN   |
| 51493 | HSPC117  | 0.00  | 0.00  | 0.00  | NaN   |
| 51495 | HSPC121  | 0.00  | 0.00  | 0.00  | NaN   |



|       |           |       |       |       |       |
|-------|-----------|-------|-------|-------|-------|
| 51497 | TH1L      | 0.18  | 0.25  | 0.00  | 0.59  |
| 51499 | HSPC132   | 0.00  | -0.13 | 0.00  | 0.27  |
| 51501 | HSPC138   | 0.00  | 0.00  | 0.00  | NaN   |
| 51504 | HSPC152   | 0.00  | 0.00  | 0.00  | NaN   |
| 51506 | HSPC155   | 0.00  | 0.00  | 0.00  | NaN   |
| 51507 | C20orf43  | 0.09  | 0.50  | 0.00  | 0.55  |
| 51510 | HSPC177   | -0.09 | 0.00  | 0.05  | 0.52  |
| 51512 | GTSE1     | 0.00  | 0.00  | 0.00  | NaN   |
| 51513 | TEL2      | 0.00  | 0.00  | 0.00  | NaN   |
| 51517 | AF3P21    | -0.09 | 0.00  | -0.05 | 0.50  |
| 51526 | C20orf111 | 0.09  | 0.00  | 0.00  | 0.15  |
| 51531 | HSPC219   | 0.00  | 0.00  | 0.00  | NaN   |
| 51533 | HSPC226   | -0.09 | -0.25 | -0.10 | 0.19  |
| 51540 | SCLY      | 0.00  | 0.00  | -0.05 | 0.23  |
| 51542 | HCC8      | 0.00  | 0.00  | 0.00  | NaN   |
| 51547 | SIRT7     | 0.00  | 0.00  | 0.00  | NaN   |
| 51548 | SIRT6     | 0.00  | 0.00  | 0.00  | NaN   |
| 51550 | CINP      | 0.00  | 0.00  | 0.00  | NaN   |
| 51552 | RAB14     | 0.00  | 0.00  | -0.10 | 0.56  |
| 51555 | PXR2b     | 0.09  | 0.00  | 0.00  | 0.11  |
| 51557 | LGS       | -0.09 | 0.00  | 0.05  | 0.26  |
| 51559 | TU12B1-TY | 0.00  | 0.00  | 0.00  | NaN   |
| 51561 | IL23A     | 0.00  | 0.00  | 0.00  | NaN   |
| 51562 | MBIP      | 0.00  | 0.00  | 0.00  | NaN   |
| 51567 | AD022     | 0.00  | 0.00  | 0.05  | 0.41  |
| 51569 | BM-002    | 0.00  | 0.00  | 0.00  | NaN   |
| 51571 | BM-009    | 0.00  | 0.13  | 0.20  | 0.38  |
| 51573 | MIR16     | 0.00  | 0.00  | 0.00  | NaN   |
| 51574 | HDCMA18P  | 0.00  | 0.00  | 0.00  | NaN   |
| 51575 | C20orf6   | 0.00  | 0.00  | 0.00  | NaN   |
| 51582 | OAZIN     | 0.18  | 0.00  | 0.00  | 0.19  |
| 51585 | PCF11     | 0.00  | 0.00  | 0.05  | -0.13 |
| 51586 | PCQAP     | 0.00  | 0.13  | 0.05  | 0.65  |
| 51588 | PIASY     | 0.00  | 0.00  | 0.00  | NaN   |
| 51592 | TRIM33    | 0.18  | 0.00  | 0.10  | 0.87  |
| 51593 | ARS2      | 0.18  | 0.00  | 0.00  | 0.29  |
| 51594 | NAG       | 0.09  | 0.00  | -0.05 | 0.46  |
| 51596 | LOC51596  | 0.00  | 0.00  | 0.00  | NaN   |
| 51599 | LISCH7    | 0.00  | 0.00  | 0.00  | NaN   |
| 51601 | LOC51601  | 0.00  | 0.00  | 0.00  | NaN   |
| 51603 | CGI-01    | 0.00  | 0.00  | 0.00  | NaN   |
| 51604 | LOC51604  | 0.00  | 0.00  | 0.00  | NaN   |
| 51606 | ATP6V1H   | 0.00  | 0.00  | 0.00  | NaN   |
| 51611 | LOC51611  | 0.09  | 0.00  | 0.00  | 0.41  |
| 51614 | SDBCAG84  | 0.00  | 0.13  | 0.00  | -0.02 |
| 51617 | LOC51617  | 0.00  | 0.00  | 0.00  | NaN   |
| 51619 | LOC51619  | 0.00  | 0.00  | 0.00  | NaN   |

|       |          |       |       |       |       |
|-------|----------|-------|-------|-------|-------|
| 51621 | KLF13    | 0.00  | 0.00  | 0.00  | NaN   |
| 51622 | LOC51622 | 0.00  | 0.00  | 0.10  | 0.26  |
| 51626 | LOC51626 | 0.00  | 0.00  | 0.00  | NaN   |
| 51631 | LOC51631 | 0.00  | 0.00  | 0.00  | NaN   |
| 51635 | LOC51635 | 0.00  | 0.00  | 0.00  | NaN   |
| 51637 | LOC51637 | 0.00  | 0.13  | 0.05  | 0.32  |
| 51642 | MRPL48   | 0.09  | 0.13  | 0.00  | 0.46  |
| 51643 | LOC51643 | 0.09  | 0.00  | 0.00  | 0.47  |
| 51646 | LOC51646 | 0.00  | 0.00  | 0.00  | NaN   |
| 51647 | LOC51647 | -0.09 | -0.13 | 0.00  | 0.43  |
| 51650 | MRPS33   | 0.00  | 0.00  | 0.00  | NaN   |
| 51651 | LOC51651 | 0.18  | 0.13  | 0.00  | 0.54  |
| 51652 | LOC51652 | 0.00  | 0.00  | -0.05 | 0.38  |
| 51654 | C20orf34 | 0.00  | 0.00  | 0.00  | NaN   |
| 51657 | LOC51657 | -0.09 | 0.00  | 0.00  | 0.30  |
| 51659 | LOC51659 | 0.00  | 0.00  | -0.05 | 0.47  |
| 51660 | BRP44I   | 0.00  | 0.00  | 0.00  | NaN   |
| 51663 | ZFR      | 0.00  | 0.00  | 0.15  | 0.36  |
| 51666 | ASB4     | 0.18  | 0.00  | 0.00  | -0.18 |
| 51668 | LOC51668 | 0.00  | 0.00  | 0.00  | NaN   |
| 51669 | MGC8721  | -0.09 | -0.25 | -0.05 | 0.10  |
| 51673 | LOC51673 | -0.09 | 0.00  | 0.05  | -0.11 |
| 51690 | LOC51690 | 0.00  | 0.00  | 0.00  | NaN   |
| 51691 | LOC51691 | 0.00  | 0.13  | 0.00  | 0.32  |
| 51693 | LOC51693 | -0.09 | -0.13 | -0.05 | 0.50  |
| 51696 | LOC51696 | 0.00  | 0.00  | 0.00  | NaN   |
| 51700 | LOC51700 | 0.00  | 0.00  | -0.05 | -0.04 |
| 51702 | PADI3    | -0.09 | 0.00  | 0.00  | 0.11  |
| 51703 | FACL5    | 0.00  | 0.00  | -0.05 | 0.04  |
| 51704 | GPRC5B   | 0.00  | 0.00  | 0.00  | NaN   |
| 51705 | LOC51705 | 0.00  | 0.00  | 0.00  | NaN   |
| 51706 | LOC51706 | 0.00  | 0.13  | 0.00  | 0.21  |
| 51710 | GIOT-2   | 0.00  | 0.00  | 0.00  | NaN   |
| 51714 | LOC51714 | 0.00  | 0.00  | 0.05  | 0.38  |
| 51715 | RAB23    | 0.00  | 0.13  | 0.00  | -0.10 |
| 51716 | LOC51716 | 0.09  | -0.38 | 0.05  | -0.18 |
| 51719 | MO25     | 0.00  | 0.00  | 0.00  | NaN   |
| 51720 | LOC51720 | 0.00  | 0.13  | 0.00  | 0.48  |
| 51725 | LOC51725 | 0.00  | 0.00  | 0.00  | NaN   |
| 51727 | UMP-CMPK | 0.00  | 0.00  | 0.00  | NaN   |
| 51728 | POLR3K   | 0.00  | 0.00  | -0.05 | 0.39  |
| 51729 | WBP11    | -0.09 | 0.00  | 0.00  | 0.31  |
| 51733 | UPB1     | 0.00  | 0.00  | 0.00  | NaN   |
| 51734 | SEPX1    | 0.00  | 0.00  | 0.00  | NaN   |
| 51735 | RA-GEF-2 | 0.00  | -0.13 | 0.00  | 0.03  |
| 51741 | WWOX     | 0.00  | 0.00  | 0.00  | NaN   |
| 51742 | BCAA     | 0.09  | 0.00  | 0.00  | 0.34  |

|       |           |       |       |       |       |
|-------|-----------|-------|-------|-------|-------|
| 51744 | CD244     | 0.00  | 0.00  | 0.00  | NaN   |
| 51747 | LUC7A     | 0.00  | 0.38  | 0.00  | 0.36  |
| 51751 | CLST11240 | 0.00  | -0.13 | 0.00  | -0.18 |
| 51752 | ARTS-1    | 0.00  | 0.00  | 0.00  | NaN   |
| 51754 | LOC51754  | -0.09 | 0.00  | 0.10  | 0.43  |
| 51755 | CrkRS     | 0.09  | 0.75  | 0.00  | 0.64  |
| 51759 | LOC51759  | 0.00  | 0.00  | 0.00  | NaN   |
| 51760 | LOC51760  | 0.00  | 0.00  | 0.00  | NaN   |
| 51761 | ATP8A2    | 0.00  | -0.13 | -0.15 | 0.11  |
| 51762 | LOC51762  | 0.00  | 0.00  | 0.00  | NaN   |
| 51763 | SKIP      | 0.00  | -0.13 | 0.00  | 0.22  |
| 51764 | GNG13     | 0.00  | 0.00  | -0.05 | 0.11  |
| 51768 | TM7SF3    | 0.00  | 0.00  | 0.00  | NaN   |
| 51773 | HBXAP     | 0.27  | 0.00  | 0.00  | 0.64  |
| 51776 | ZAK       | 0.00  | 0.00  | 0.05  | 0.14  |
| 51778 | MYOZ2     | 0.00  | 0.00  | 0.00  | NaN   |
| 51780 | C5orf7    | 0.00  | 0.00  | 0.00  | NaN   |
| 51806 | CLSP      | 0.00  | 0.00  | 0.05  | 0.24  |
| 51807 | TUBA8     | 0.00  | 0.00  | 0.00  | -0.13 |
| 51809 | GALNT7    | 0.00  | 0.00  | -0.05 | 0.29  |
| 51816 | CECR1     | 0.00  | 0.00  | 0.05  | -0.05 |
| 53335 | BCL11A    | 0.00  | 0.00  | 0.00  | NaN   |
| 53339 | BTBD1     | 0.00  | 0.00  | -0.05 | 0.46  |
| 53340 | SPA17     | 0.00  | 0.00  | -0.10 | 0.11  |
| 53343 | NUDT9     | 0.00  | 0.00  | 0.00  | NaN   |
| 53346 | TM6SF1    | 0.00  | 0.00  | -0.05 | 0.05  |
| 53347 | UBASH3A   | 0.00  | 0.00  | 0.00  | NaN   |
| 53353 | LRP1B     | -0.09 | 0.00  | 0.00  | 0.14  |
| 53358 | SHC3      | 0.00  | 0.00  | 0.00  | NaN   |
| 53371 | NUP54     | 0.00  | 0.00  | 0.00  | NaN   |
| 53373 | KIAA1169  | 0.00  | 0.00  | 0.00  | NaN   |
| 53405 | CLIC5     | 0.00  | 0.00  | 0.00  | NaN   |
| 53407 | STX18     | 0.00  | -0.13 | -0.15 | 0.30  |
| 53615 | MBD3      | 0.00  | 0.00  | 0.00  | NaN   |
| 53616 | ADAM22    | 0.00  | 0.00  | 0.00  | NaN   |
| 53630 | BCDO      | -0.09 | 0.00  | -0.05 | 0.21  |
| 53635 | PTOV1     | 0.00  | 0.00  | 0.00  | NaN   |
| 53637 | EDG8      | 0.00  | 0.00  | 0.05  | 0.05  |
| 53820 | DSCR6     | 0.00  | 0.00  | 0.00  | NaN   |
| 53822 | FXYD7     | 0.00  | 0.00  | 0.00  | NaN   |
| 53826 | FXYD6     | -0.09 | 0.00  | 0.00  | -0.12 |
| 53827 | FXYD5     | 0.00  | 0.00  | 0.00  | NaN   |
| 53829 | GPR86     | 0.00  | 0.00  | 0.00  | NaN   |
| 53832 | IL20RA    | 0.00  | 0.00  | 0.00  | NaN   |
| 53836 | GPR87     | 0.00  | 0.00  | 0.00  | NaN   |
| 53838 | C11orf24  | 0.55  | 0.00  | 0.00  | 0.48  |
| 53840 | TRIM34    | 0.00  | -0.13 | -0.05 | 0.12  |

|       |              |       |       |       |       |
|-------|--------------|-------|-------|-------|-------|
| 53841 | MUCDHL       | -0.27 | -0.13 | -0.05 | 0.15  |
| 53904 | MYO3A        | -0.09 | 0.00  | 0.00  | 0.09  |
| 53905 | DUOX1        | 0.00  | 0.00  | 0.00  | NaN   |
| 53916 | RAB4B        | 0.00  | 0.00  | 0.00  | NaN   |
| 53918 | PELO         | 0.00  | 0.00  | -0.05 | 0.45  |
| 53919 | SLC21A14     | 0.00  | 0.00  | 0.00  | NaN   |
| 53942 | CNTN5        | 0.00  | 0.00  | 0.00  | NaN   |
| 53944 | CSNK1G1      | 0.09  | 0.00  | 0.00  | 0.25  |
| 53947 | A4GALT       | 0.00  | 0.00  | 0.00  | NaN   |
| 54014 | WDR9         | 0.00  | 0.00  | 0.00  | NaN   |
| 54020 | SLC37A1      | 0.00  | 0.00  | 0.00  | NaN   |
| 54039 | PCBP3        | 0.00  | 0.00  | 0.00  | NaN   |
| 54069 | C21orf45     | 0.00  | 0.00  | 0.00  | NaN   |
| 54093 | C21orf18     | 0.00  | 0.00  | 0.00  | NaN   |
| 54101 | ANKRD3       | 0.00  | 0.00  | 0.00  | NaN   |
| 54103 | LOC54103     | -0.09 | 0.00  | 0.00  | 0.03  |
| 54107 | POLE3        | 0.00  | 0.00  | 0.00  | NaN   |
| 54112 | GPR88        | 0.09  | 0.00  | 0.00  | 0.16  |
| 54148 | MRPL39       | 0.00  | 0.00  | 0.00  | NaN   |
| 54149 | C21orf91     | 0.00  | -0.13 | 0.00  | 0.00  |
| 54165 | RP42         | 0.09  | 0.00  | 0.00  | 0.15  |
| 54187 | SAS          | 0.00  | 0.00  | 0.00  | NaN   |
| 54205 | HCS          | 0.00  | 0.13  | 0.00  | 0.00  |
| 54207 | KCNK10       | 0.00  | 0.13  | 0.00  | -0.13 |
| 54209 | TREM2        | 0.00  | 0.00  | 0.00  | NaN   |
| 54210 | TREM1        | 0.00  | 0.00  | 0.00  | NaN   |
| 54212 | SNTG1        | 0.00  | 0.00  | 0.00  | NaN   |
| 54221 | SNTG2        | 0.00  | 0.00  | 0.00  | NaN   |
| 54329 | GPR85        | 0.09  | 0.00  | 0.00  | -0.32 |
| 54332 | GDAP1        | 0.00  | 0.25  | 0.00  | -0.10 |
| 54344 | DPM3         | 0.27  | 0.13  | 0.00  | 0.39  |
| 54345 | SOX18        | 0.00  | 0.00  | 0.00  | NaN   |
| 54360 | C17          | 0.00  | -0.13 | -0.15 | 0.01  |
| 54361 | WNT4         | -0.09 | 0.00  | 0.00  | -0.05 |
| 54363 | HAO1         | 0.00  | 0.00  | 0.05  | 0.04  |
| 54386 | RAP1         | 0.00  | -0.13 | 0.05  | 0.35  |
| 54407 | SLC38A2      | 0.00  | 0.00  | 0.50  | -0.06 |
| 54431 | DKFZP434J181 | 0.00  | 0.00  | 0.00  | NaN   |
| 54434 | SSH1         | 0.00  | -0.13 | 0.00  | 0.31  |
| 54435 | HCGIV.9      | 0.00  | 0.00  | 0.00  | NaN   |
| 54436 | FLJ20356     | 0.00  | -0.13 | -0.10 | 0.11  |
| 54438 | FLJ20330     | 0.00  | 0.00  | 0.05  | 0.46  |
| 54441 | DKFZP434A01  | 0.00  | 0.00  | 0.00  | 0.20  |
| 54442 | FLJ20040     | 0.00  | 0.13  | 0.00  | 0.23  |
| 54453 | RIN2         | 0.00  | 0.00  | 0.00  | NaN   |
| 54454 | KIAA1240     | 0.09  | 0.00  | -0.05 | 0.40  |
| 54455 | KIAA1332     | 0.09  | 0.13  | 0.10  | 0.11  |

|       |              |       |       |       |       |
|-------|--------------|-------|-------|-------|-------|
| 54458 | DKFZP564J157 | 0.00  | 0.00  | 0.00  | NaN   |
| 54462 | KIAA1128     | 0.09  | 0.00  | -0.05 | 0.49  |
| 54463 | FLJ20152     | 0.00  | 0.00  | 0.10  | -0.08 |
| 54465 | ETAA16       | 0.00  | 0.00  | 0.00  | NaN   |
| 54468 | FLJ20323     | 0.00  | 0.00  | 0.05  | 0.22  |
| 54469 | AWP1         | 0.00  | 0.00  | 0.00  | NaN   |
| 54471 | FLJ20232     | -0.09 | 0.00  | 0.05  | 0.46  |
| 54472 | TOLLIP       | -0.27 | -0.13 | -0.05 | 0.42  |
| 54474 | KRT20        | 0.00  | 0.25  | 0.00  | 0.29  |
| 54475 | FLJ10458     | 0.00  | -0.13 | 0.00  | 0.10  |
| 54476 | TRIAD3       | 0.00  | 0.00  | 0.10  | 0.43  |
| 54477 | PEPP2        | 0.00  | 0.00  | 0.00  | NaN   |
| 54478 | FLJ10156     | 0.00  | 0.00  | 0.00  | NaN   |
| 54480 | KIAA1402     | 0.00  | 0.00  | -0.05 | 0.31  |
| 54482 | FLJ10287     | 0.00  | 0.00  | 0.00  | NaN   |
| 54487 | DGCR8        | -0.09 | 0.00  | 0.00  | -0.12 |
| 54490 | UGT2B28      | -0.09 | 0.00  | -0.15 | 0.00  |
| 54491 | FLJ11127     | 0.00  | -0.25 | 0.20  | 0.38  |
| 54494 | FLJ20010     | -0.09 | 0.00  | 0.00  | 0.26  |
| 54496 | FLJ10640     | -0.09 | -0.13 | 0.00  | 0.33  |
| 54498 | C20orf16     | 0.00  | 0.00  | 0.00  | NaN   |
| 54499 | LOC54499     | 0.00  | 0.00  | 0.00  | NaN   |
| 54502 | FLJ20273     | 0.00  | 0.00  | 0.00  | NaN   |
| 54503 | FLJ10852     | 0.00  | 0.00  | 0.00  | NaN   |
| 54504 | CPVL         | 0.00  | 0.13  | 0.00  | -0.10 |
| 54505 | LOC54505     | 0.00  | 0.00  | -0.05 | 0.44  |
| 54509 | ARHF         | 0.00  | -0.13 | 0.00  | 0.03  |
| 54512 | FLJ20591     | 0.18  | 0.00  | 0.10  | 0.25  |
| 54514 | VASA         | 0.00  | 0.00  | 0.00  | NaN   |
| 54517 | FLJ20485     | 0.09  | 0.00  | 0.00  | 0.31  |
| 54518 | LOC54518     | -0.09 | 0.00  | 0.00  | 0.12  |
| 54520 | FLJ10996     | 0.00  | 0.00  | 0.00  | NaN   |
| 54529 | FLJ20752     | 0.00  | 0.00  | 0.00  | NaN   |
| 54531 | KIAA1193     | 0.00  | 0.00  | -0.05 | 0.19  |
| 54535 | HCR          | 0.00  | 0.00  | 0.00  | NaN   |
| 54537 | MGC5560      | 0.09  | 0.00  | -0.10 | 0.73  |
| 54540 | FLJ10404     | 0.00  | 0.00  | 0.00  | NaN   |
| 54541 | RTP801       | 0.09  | 0.00  | 0.00  | 0.01  |
| 54542 | MNAB         | 0.00  | 0.00  | 0.00  | NaN   |
| 54543 | LOC54543     | 0.00  | 0.13  | 0.00  | -0.01 |
| 54544 | NICE-1       | 0.00  | 0.00  | 0.00  | NaN   |
| 54545 | 3PAP         | 0.00  | 0.00  | 0.15  | 0.26  |
| 54546 | FLJ20225     | -0.09 | 0.00  | 0.00  | -0.10 |
| 54549 | FLJ10832     | 0.00  | 0.00  | 0.00  | NaN   |
| 54550 | LOC54550     | -0.09 | -0.13 | -0.05 | -0.06 |
| 54551 | MAGEL2       | 0.00  | -0.13 | 0.00  | -0.02 |
| 54554 | WDR5B        | 0.00  | 0.00  | 0.00  | NaN   |

|       |             |       |       |       |       |
|-------|-------------|-------|-------|-------|-------|
| 54555 | FLJ10432    | 0.00  | 0.00  | 0.00  | NaN   |
| 54556 | ING3        | 0.00  | 0.13  | 0.00  | 0.27  |
| 54558 | SPATA6      | 0.00  | 0.00  | 0.00  | NaN   |
| 54566 | EHM2        | 0.00  | 0.00  | 0.00  | NaN   |
| 54576 | UGT1A8      | 0.00  | 0.00  | 0.00  | NaN   |
| 54578 | UGT1A6      | 0.00  | 0.00  | 0.00  | NaN   |
| 54581 | SCAND2      | 0.00  | 0.00  | -0.05 | 0.14  |
| 54583 | EGLN1       | 0.09  | 0.00  | 0.00  | 0.29  |
| 54585 | LZTFL1      | -0.09 | 0.00  | -0.05 | 0.38  |
| 54596 | FLJ10884    | 0.00  | 0.00  | 0.00  | NaN   |
| 54600 | UGT1A9      | 0.00  | 0.00  | 0.00  | NaN   |
| 54606 | NOH61       | 0.00  | 0.00  | 0.00  | NaN   |
| 54619 | FLJ10895    | 0.00  | 0.00  | -0.05 | 0.14  |
| 54621 | FLJ20674    | 0.00  | -0.13 | 0.00  | 0.05  |
| 54622 | FLJ20051    | 0.00  | 0.00  | 0.00  | 0.00  |
| 54626 | HES2        | 0.00  | 0.00  | 0.00  | NaN   |
| 54629 | KIAA1164    | 0.09  | 0.00  | 0.05  | 0.05  |
| 54657 | UGT1A4      | 0.00  | 0.00  | 0.00  | NaN   |
| 54658 | UGT1A1      | 0.00  | 0.00  | 0.00  | NaN   |
| 54659 | UGT1A3      | 0.00  | 0.00  | 0.00  | NaN   |
| 54662 | FLJ10743    | 0.00  | 0.00  | 0.00  | NaN   |
| 54663 | FLJ10439    | 0.00  | 0.00  | 0.00  | NaN   |
| 54664 | FLJ11273    | 0.00  | 0.13  | 0.10  | 0.13  |
| 54665 | FLJ11220    | 0.27  | 0.00  | 0.05  | 0.48  |
| 54674 | LRRN3       | 0.09  | 0.00  | 0.00  | 0.08  |
| 54676 | GTPBP2      | 0.00  | 0.00  | 0.00  | NaN   |
| 54677 | CROT        | 0.00  | 0.00  | 0.00  | NaN   |
| 54680 | FLJ20729    | 0.00  | 0.00  | 0.10  | 0.54  |
| 54682 | FLJ10298    | -0.09 | 0.00  | 0.10  | -0.11 |
| 54704 | PDP         | 0.00  | -0.13 | 0.00  | 0.43  |
| 54707 | FLJ10349    | -0.09 | -0.13 | 0.00  | 0.40  |
| 54708 | FLJ20445    | 0.00  | 0.00  | 0.00  | NaN   |
| 54714 | CNGB3       | 0.18  | 0.25  | 0.00  | 0.23  |
| 54715 | A2BP1       | 0.00  | 0.00  | 0.00  | NaN   |
| 54716 | XT3         | -0.09 | 0.00  | -0.05 | 0.07  |
| 54718 | BTN2A3      | 0.00  | 0.00  | 0.00  | NaN   |
| 54726 | HSHIN1      | 0.00  | 0.00  | 0.00  | NaN   |
| 54732 | HSGP25L2G   | 0.00  | 0.00  | 0.00  | NaN   |
| 54733 | HSNOV1      | 0.00  | 0.00  | 0.00  | NaN   |
| 54738 | HSRANFEV    | 0.00  | 0.00  | 0.00  | NaN   |
| 54739 | HSXIAPAF1   | 0.00  | 0.00  | 0.00  | NaN   |
| 54741 | HSOBRGRP    | 0.00  | 0.00  | -0.05 | 0.31  |
| 54752 | DKFZp434H22 | 0.00  | -0.13 | 0.00  | -0.43 |
| 54758 | DKFZp434G05 | -0.09 | -0.13 | -0.05 | 0.49  |
| 54762 | DKFZp434C03 | 0.00  | 0.00  | 0.00  | NaN   |
| 54763 | DKFZp434B12 | 0.00  | 0.00  | 0.00  | NaN   |
| 54765 | HSA249128   | 0.00  | 0.13  | 0.05  | 0.68  |

|       |             |       |       |       |       |
|-------|-------------|-------|-------|-------|-------|
| 54766 | BTG4        | 0.00  | 0.00  | 0.00  | NaN   |
| 54769 | DKFZp761C07 | 0.00  | 0.00  | 0.00  | NaN   |
| 54777 | DKFZp434A17 | 0.00  | 0.00  | -0.05 | 0.49  |
| 54778 | DKFZp761D08 | 0.09  | 0.00  | 0.05  | 0.32  |
| 54780 | FLJ20003    | 0.00  | 0.00  | -0.05 | 0.29  |
| 54784 | FLJ20013    | 0.18  | 0.00  | 0.00  | 0.37  |
| 54785 | FLJ20014    | 0.00  | 0.00  | 0.00  | NaN   |
| 54788 | DNAJB12     | 0.09  | 0.00  | 0.00  | 0.55  |
| 54793 | FLJ20038    | -0.09 | -0.25 | -0.05 | 0.29  |
| 54795 | TRPM4       | 0.09  | 0.00  | 0.00  | -0.06 |
| 54796 | FLJ20043    | 0.00  | -0.13 | -0.15 | 0.08  |
| 54797 | FLJ20045    | 0.00  | 0.00  | 0.00  | NaN   |
| 54798 | FLJ20047    | 0.00  | 0.00  | 0.00  | 0.12  |
| 54799 | FLJ20055    | 0.00  | 0.25  | 0.00  | 0.01  |
| 54800 | FLJ20059    | 0.09  | 0.00  | 0.00  | 0.12  |
| 54801 | FLJ20060    | 0.00  | -0.25 | -0.10 | 0.29  |
| 54802 | IPT         | 0.00  | 0.00  | 0.00  | NaN   |
| 54805 | CNNM2       | 0.00  | -0.13 | -0.05 | -0.05 |
| 54806 | FLJ20069    | 0.00  | 0.00  | 0.05  | 0.04  |
| 54807 | FLJ20070    | 0.00  | 0.13  | 0.00  | 0.37  |
| 54808 | FLJ20071    | -0.09 | -0.13 | -0.15 | -0.06 |
| 54809 | FLJ20073    | 0.18  | 0.00  | 0.00  | -0.04 |
| 54810 | GIPC2       | 0.00  | 0.00  | 0.00  | NaN   |
| 54811 | FLJ20079    | 0.00  | 0.00  | 0.00  | NaN   |
| 54812 | FLJ20080    | 0.00  | 0.00  | 0.00  | NaN   |
| 54813 | FLJ20081    | 0.00  | 0.00  | 0.00  | NaN   |
| 54814 | FLJ20084    | 0.09  | 0.00  | 0.00  | 0.12  |
| 54815 | FLJ20085    | 0.00  | 0.00  | 0.00  | NaN   |
| 54816 | FLJ20086    | 0.00  | 0.00  | 0.05  | -0.17 |
| 54819 | FLJ20094    | 0.00  | -0.13 | 0.00  | 0.18  |
| 54820 | NUDE1       | 0.00  | 0.00  | 0.00  | NaN   |
| 54825 | PC-LKC      | 0.00  | 0.00  | 0.00  | NaN   |
| 54826 | FLJ20125    | 0.00  | 0.00  | 0.00  | NaN   |
| 54827 | FLJ20127    | -0.09 | 0.00  | 0.00  | 0.04  |
| 54828 | FLJ20128    | 0.27  | 0.13  | 0.00  | 0.70  |
| 54829 | ASPN        | 0.00  | 0.00  | 0.00  | NaN   |
| 54831 | FLJ20132    | 0.00  | 0.00  | 0.00  | NaN   |
| 54832 | FLJ20136    | 0.00  | 0.00  | 0.00  | NaN   |
| 54834 | GDAP2       | 0.18  | 0.00  | 0.05  | 0.39  |
| 54836 | FLJ20150    | 0.00  | 0.00  | 0.00  | NaN   |
| 54838 | FLJ20154    | 0.00  | -0.13 | -0.05 | 0.31  |
| 54839 | FLJ20156    | 0.00  | 0.00  | 0.00  | NaN   |
| 54840 | APTX        | -0.09 | 0.00  | 0.00  | 0.56  |
| 54842 | FLJ20160    | 0.00  | 0.00  | 0.00  | NaN   |
| 54845 | FLJ20171    | 0.00  | -0.13 | 0.00  | 0.30  |
| 54847 | FLJ20174    | 0.00  | 0.00  | 0.00  | NaN   |
| 54848 | FLJ20184    | 0.00  | 0.00  | 0.00  | NaN   |

|       |          |       |       |       |       |
|-------|----------|-------|-------|-------|-------|
| 54849 | FLJ20186 | -0.09 | -0.13 | -0.05 | 0.29  |
| 54850 | FLJ20188 | 0.00  | 0.00  | 0.05  | 0.60  |
| 54851 | FLJ20189 | -0.09 | 0.13  | -0.05 | 0.42  |
| 54852 | FLJ20190 | 0.00  | 0.00  | -0.05 | -0.09 |
| 54853 | FLJ20195 | 0.00  | 0.00  | 0.00  | NaN   |
| 54854 | FLJ20200 | 0.09  | 0.00  | 0.00  | -0.07 |
| 54855 | FLJ20202 | 0.09  | 0.00  | 0.05  | 0.03  |
| 54856 | FLJ20203 | 0.09  | 0.13  | 0.00  | 0.37  |
| 54858 | FLJ20208 | 0.00  | 0.00  | 0.00  | NaN   |
| 54859 | FLJ20211 | -0.09 | 0.00  | -0.05 | 0.07  |
| 54860 | MS4A12   | 0.00  | 0.00  | 0.00  | NaN   |
| 54861 | FLJ20224 | 0.00  | 0.00  | -0.05 | 0.02  |
| 54862 | FLJ20241 | 0.00  | 0.00  | 0.00  | NaN   |
| 54863 | FLJ20245 | 0.00  | 0.00  | 0.00  | NaN   |
| 54866 | PPP1R14D | 0.00  | 0.00  | 0.00  | NaN   |
| 54867 | FLJ20254 | 0.09  | 0.00  | 0.05  | 0.60  |
| 54868 | FLJ20255 | 0.00  | 0.13  | 0.00  | 0.07  |
| 54869 | EPS8R1   | 0.09  | 0.00  | 0.00  | 0.39  |
| 54870 | FLJ20259 | -0.09 | 0.00  | -0.05 | 0.50  |
| 54872 | FLJ20265 | 0.00  | -0.13 | -0.10 | 0.39  |
| 54873 | PALMD    | 0.00  | 0.00  | 0.00  | NaN   |
| 54874 | FLJ20275 | 0.09  | 0.00  | 0.05  | 0.38  |
| 54875 | FLJ20276 | 0.00  | 0.00  | -0.20 | 0.31  |
| 54876 | FLJ20280 | 0.00  | 0.00  | -0.05 | 0.03  |
| 54877 | FLJ20281 | -0.09 | 0.00  | -0.15 | 0.32  |
| 54878 | DPP8     | 0.00  | 0.00  | 0.00  | NaN   |
| 54879 | ST7L     | 0.09  | 0.00  | 0.05  | 0.11  |
| 54881 | FLJ20287 | 0.00  | 0.00  | 0.00  | NaN   |
| 54882 | FLJ20288 | 0.00  | 0.00  | 0.00  | NaN   |
| 54883 | FLJ20291 | 0.00  | 0.38  | 0.00  | 0.66  |
| 54884 | FLJ20296 | 0.00  | 0.00  | 0.00  | NaN   |
| 54886 | FLJ20300 | 0.00  | 0.00  | 0.00  | NaN   |
| 54891 | FLJ20309 | 0.00  | 0.00  | 0.00  | NaN   |
| 54892 | FLJ20311 | 0.00  | 0.00  | -0.05 | 0.05  |
| 54893 | FLJ20313 | 0.00  | 0.00  | 0.00  | NaN   |
| 54894 | FLJ20315 | 0.09  | 0.00  | 0.00  | 0.49  |
| 54896 | FLJ20320 | -0.09 | 0.00  | 0.00  | 0.12  |
| 54897 | FLJ20321 | 0.00  | 0.00  | 0.00  | NaN   |
| 54898 | ELOVL2   | 0.00  | 0.00  | 0.05  | -0.04 |
| 54900 | FLJ20340 | 0.00  | 0.13  | 0.00  | 0.02  |
| 54901 | FLJ20342 | 0.00  | 0.00  | 0.00  | NaN   |
| 54902 | FLJ20343 | 0.00  | 0.00  | 0.00  | NaN   |
| 54903 | FLJ20345 | 0.09  | -0.13 | 0.00  | 0.23  |
| 54904 | WHSC1L1  | 0.45  | -0.13 | 0.00  | 0.62  |
| 54905 | FLJ20359 | 0.00  | 0.00  | 0.00  | -0.24 |
| 54906 | FLJ20360 | 0.00  | 0.00  | 0.05  | 0.20  |
| 54908 | FLJ20364 | 0.00  | 0.00  | 0.00  | NaN   |



|       |          |       |       |       |       |
|-------|----------|-------|-------|-------|-------|
| 54910 | SEMA4C   | 0.00  | 0.00  | 0.00  | NaN   |
| 54913 | FLJ20374 | 0.00  | 0.00  | 0.00  | NaN   |
| 54914 | FLJ20375 | 0.00  | -0.25 | -0.05 | 0.37  |
| 54916 | FLJ20392 | 0.00  | 0.00  | 0.05  | -0.02 |
| 54918 | FLJ20396 | 0.00  | -0.13 | 0.00  | 0.44  |
| 54919 | FLJ20397 | 0.00  | 0.13  | 0.00  | 0.53  |
| 54920 | FLJ20399 | -0.09 | -0.13 | 0.00  | 0.31  |
| 54922 | FLJ20401 | 0.09  | 0.00  | 0.00  | 0.03  |
| 54923 | FLJ20406 | 0.09  | 0.00  | 0.00  | 0.11  |
| 54925 | FLJ20417 | 0.00  | 0.00  | 0.00  | NaN   |
| 54927 | FLJ20420 | 0.00  | -0.13 | 0.00  | 0.28  |
| 54928 | FLJ20421 | 0.00  | 0.00  | 0.00  | NaN   |
| 54929 | FLJ20422 | 0.00  | 0.00  | 0.00  | NaN   |
| 54930 | FLJ20424 | 0.00  | 0.00  | 0.00  | NaN   |
| 54932 | FLJ20433 | 0.00  | 0.00  | 0.00  | NaN   |
| 54933 | FLJ20435 | 0.00  | 0.00  | 0.00  | NaN   |
| 54934 | FLJ20436 | 0.00  | 0.00  | 0.00  | NaN   |
| 54937 | FLJ20449 | 0.00  | 0.00  | 0.00  | NaN   |
| 54938 | FLJ20450 | 0.00  | 0.00  | 0.00  | NaN   |
| 54939 | FLJ20452 | 0.00  | 0.00  | 0.00  | NaN   |
| 54941 | FLJ20456 | 0.00  | 0.00  | -0.15 | 0.26  |
| 54942 | FLJ20457 | 0.00  | 0.00  | 0.00  | NaN   |
| 54943 | C21orf55 | 0.00  | 0.00  | 0.00  | NaN   |
| 54946 | FLJ20473 | 0.00  | 0.00  | 0.00  | NaN   |
| 54948 | MRPL16   | 0.00  | 0.00  | 0.00  | NaN   |
| 54951 | FLJ20502 | 0.00  | 0.00  | 0.00  | NaN   |
| 54952 | SECP43   | 0.00  | 0.00  | 0.00  | NaN   |
| 54953 | C1orf27  | 0.00  | 0.00  | 0.00  | NaN   |
| 54955 | FLJ20508 | 0.00  | 0.00  | 0.00  | NaN   |
| 54956 | FLJ20509 | 0.00  | 0.00  | 0.00  | NaN   |
| 54957 | FLJ20511 | 0.00  | 0.00  | 0.05  | 0.25  |
| 54958 | FLJ20512 | 0.09  | 0.00  | 0.00  | 0.23  |
| 54959 | FLJ20513 | 0.00  | 0.00  | 0.00  | NaN   |
| 54961 | SSH-3    | 0.45  | 0.00  | 0.05  | 0.56  |
| 54962 | FLJ20516 | 0.00  | 0.00  | 0.00  | NaN   |
| 54963 | URKL1    | 0.00  | 0.13  | 0.00  | -0.45 |
| 54964 | FLJ20519 | 0.00  | 0.00  | 0.05  | 0.20  |
| 54968 | FLJ20533 | 0.00  | 0.25  | 0.00  | 0.46  |
| 54969 | FLJ20534 | 0.00  | 0.13  | -0.05 | 0.06  |
| 54970 | FLJ20535 | 0.00  | 0.00  | 0.00  | NaN   |
| 54971 | BANP     | -0.09 | -0.13 | -0.05 | 0.30  |
| 54972 | FLJ20539 | 0.00  | 0.00  | 0.00  | NaN   |
| 54974 | FLJ20546 | 0.00  | 0.00  | 0.00  | NaN   |
| 54976 | C20orf27 | 0.00  | 0.00  | 0.00  | NaN   |
| 54977 | FLJ20551 | 0.00  | 0.00  | -0.05 | 0.18  |
| 54978 | FLJ20555 | 0.09  | 0.00  | 0.05  | 0.28  |
| 54979 | HRASLS2  | 0.00  | 0.00  | 0.00  | NaN   |

|       |          |       |       |       |       |
|-------|----------|-------|-------|-------|-------|
| 54980 | FLJ20558 | 0.00  | 0.00  | 0.00  | NaN   |
| 54981 | FLJ20559 | 0.00  | 0.00  | -0.05 | 0.04  |
| 54982 | CLN6     | 0.00  | 0.00  | 0.00  | NaN   |
| 54985 | FLJ20568 | 0.00  | 0.00  | 0.00  | NaN   |
| 54986 | FLJ20574 | 0.00  | 0.00  | -0.05 | 0.17  |
| 54987 | FLJ20580 | 0.00  | 0.00  | 0.00  | NaN   |
| 54988 | FLJ20581 | 0.00  | 0.00  | 0.00  | NaN   |
| 54991 | FLJ20584 | 0.00  | 0.00  | 0.00  | NaN   |
| 54993 | FLJ20595 | 0.00  | 0.00  | -0.05 | 0.04  |
| 54994 | C20orf11 | 0.09  | 0.13  | 0.00  | 0.17  |
| 54995 | FLJ20604 | 0.00  | 0.00  | 0.00  | NaN   |
| 54996 | FLJ20605 | 0.09  | 0.13  | 0.05  | 0.22  |
| 54997 | TSC      | 0.00  | -0.13 | 0.00  | -0.25 |
| 54998 | FLJ20608 | 0.00  | 0.00  | 0.00  | NaN   |
| 55001 | FLJ20619 | 0.00  | 0.00  | 0.00  | NaN   |
| 55002 | FLJ20623 | -0.18 | -0.13 | -0.05 | 0.19  |
| 55003 | FLJ20624 | 0.00  | 0.00  | 0.05  | 0.28  |
| 55005 | FLJ20627 | 0.00  | 0.00  | 0.00  | NaN   |
| 55007 | FLJ20635 | 0.00  | 0.00  | 0.00  | NaN   |
| 55008 | FLJ20637 | 0.00  | 0.00  | 0.00  | NaN   |
| 55009 | FLJ20640 | 0.00  | 0.00  | 0.00  | NaN   |
| 55010 | FLJ20641 | 0.00  | 0.00  | 0.00  | NaN   |
| 55011 | FLJ20643 | 0.00  | 0.00  | 0.00  | NaN   |
| 55012 | FLJ20644 | 0.00  | 0.00  | 0.00  | NaN   |
| 55013 | FLJ20647 | 0.00  | 0.00  | 0.00  | NaN   |
| 55014 | FLJ20651 | 0.00  | 0.00  | 0.00  | NaN   |
| 55015 | FLJ20666 | 0.00  | 0.00  | 0.00  | NaN   |
| 55016 | FLJ20668 | 0.00  | 0.00  | 0.00  | NaN   |
| 55018 | FLJ20694 | 0.00  | 0.38  | 0.00  | 0.17  |
| 55020 | FLJ20699 | 0.00  | 0.00  | 0.00  | NaN   |
| 55022 | FLJ20701 | 0.00  | 0.00  | 0.00  | NaN   |
| 55023 | PHIP     | 0.00  | 0.00  | 0.00  | NaN   |
| 55024 | BANK     | 0.00  | 0.00  | 0.00  | NaN   |
| 55027 | FLJ20718 | 0.00  | 0.00  | -0.05 | 0.31  |
| 55028 | FLJ20721 | 0.00  | 0.00  | 0.00  | NaN   |
| 55030 | FLJ20725 | 0.00  | 0.00  | 0.05  | 0.28  |
| 55031 | FLJ20727 | 0.00  | 0.00  | 0.00  | NaN   |
| 55032 | FLJ20730 | 0.00  | 0.00  | 0.00  | NaN   |
| 55033 | FLJ20731 | 0.00  | 0.13  | 0.00  | -0.27 |
| 55034 | HMCS     | 0.00  | -0.13 | -0.25 | 0.22  |
| 55035 | FLJ20736 | 0.00  | 0.00  | 0.00  | NaN   |
| 55036 | FLJ20753 | 0.00  | 0.25  | 0.00  | 0.27  |
| 55037 | FLJ20758 | 0.00  | 0.00  | -0.05 | 0.26  |
| 55038 | CDCA4    | 0.00  | 0.00  | 0.00  | NaN   |
| 55039 | FLJ20772 | 0.18  | 0.38  | -0.05 | 0.65  |
| 55040 | EPN3     | 0.00  | 0.25  | 0.00  | 0.55  |
| 55041 | FLJ20783 | 0.00  | 0.00  | -0.05 | 0.10  |

|       |          |       |       |       |       |
|-------|----------|-------|-------|-------|-------|
| 55048 | FLJ20847 | 0.00  | 0.00  | 0.00  | NaN   |
| 55049 | FLJ20850 | 0.00  | 0.00  | 0.00  | NaN   |
| 55051 | FLJ10008 | 0.00  | 0.13  | 0.00  | 0.03  |
| 55052 | MRPL20   | 0.00  | 0.00  | 0.00  | NaN   |
| 55054 | FLJ10035 | 0.00  | 0.00  | 0.00  | NaN   |
| 55055 | FLJ10036 | 0.00  | 0.00  | 0.00  | NaN   |
| 55056 | FLJ10038 | 0.18  | 0.00  | 0.00  | 0.56  |
| 55057 | FLJ10040 | -0.09 | 0.00  | 0.00  | 0.14  |
| 55061 | FLJ10052 | 0.09  | 0.00  | 0.00  | 0.27  |
| 55062 | FLJ10055 | 0.18  | 0.13  | 0.00  | -0.03 |
| 55063 | FLJ10057 | 0.18  | 0.00  | 0.00  | 0.31  |
| 55064 | FLJ10058 | -0.09 | -0.13 | -0.15 | -0.21 |
| 55065 | FLJ10060 | 0.00  | 0.00  | 0.00  | -0.17 |
| 55066 | FLJ10079 | -0.09 | -0.13 | 0.05  | 0.09  |
| 55068 | FLJ10094 | 0.00  | 0.00  | -0.05 | -0.04 |
| 55069 | FLJ10099 | -0.09 | 0.00  | 0.00  | 0.47  |
| 55070 | FLJ10103 | 0.00  | 0.00  | -0.05 | 0.39  |
| 55071 | FLJ10110 | 0.00  | 0.00  | -0.05 | -0.12 |
| 55072 | FLJ10111 | 0.00  | 0.00  | 0.00  | NaN   |
| 55073 | FLJ10120 | -0.09 | 0.25  | 0.05  | 0.02  |
| 55074 | OXR1     | 0.18  | -0.13 | 0.00  | 0.43  |
| 55076 | FLJ10134 | 0.00  | 0.00  | 0.00  | NaN   |
| 55079 | FLJ10142 | 0.09  | 0.00  | -0.05 | -0.29 |
| 55080 | FLJ10143 | -0.09 | 0.00  | 0.00  | 0.18  |
| 55081 | ESRRBL1  | 0.00  | 0.00  | 0.00  | NaN   |
| 55082 | FLJ10154 | -0.09 | -0.13 | 0.00  | 0.41  |
| 55083 | FLJ10157 | 0.00  | 0.13  | 0.00  | -0.12 |
| 55084 | FLJ10159 | 0.00  | 0.00  | 0.10  | -0.08 |
| 55088 | FLJ10188 | 0.00  | 0.00  | -0.05 | 0.16  |
| 55089 | SLC38A4  | 0.00  | 0.00  | 0.00  | NaN   |
| 55090 | FLJ10193 | 0.00  | 0.00  | 0.00  | NaN   |
| 55092 | FLJ10199 | 0.00  | 0.00  | 0.00  | NaN   |
| 55093 | FLJ10204 | 0.27  | 0.25  | 0.05  | 0.47  |
| 55094 | FLJ10206 | 0.00  | 0.00  | 0.05  | 0.28  |
| 55095 | FLJ10211 | 0.00  | 0.00  | 0.00  | NaN   |
| 55096 | FLJ10213 | -0.09 | 0.00  | -0.05 | 0.23  |
| 55100 | FLJ10233 | 0.00  | 0.00  | 0.05  | 0.32  |
| 55101 | FLJ10241 | 0.00  | 0.00  | -0.05 | 0.34  |
| 55102 | FLJ10242 | 0.00  | 0.00  | 0.00  | NaN   |
| 55103 | FLJ10244 | 0.00  | 0.00  | 0.00  | NaN   |
| 55105 | FLJ10252 | 0.09  | 0.00  | 0.00  | -0.15 |
| 55106 | FLJ10260 | 0.00  | 0.00  | 0.00  | -0.13 |
| 55107 | FLJ10261 | 0.55  | 0.25  | 0.00  | 0.39  |
| 55108 | FLJ10276 | 0.00  | 0.00  | 0.00  | NaN   |
| 55109 | FLJ10283 | 0.00  | 0.00  | 0.00  | NaN   |
| 55110 | FLJ10292 | -0.18 | 0.00  | 0.00  | 0.30  |
| 55111 | FLJ10297 | -0.09 | 0.00  | 0.00  | -0.04 |

|       |          |       |       |       |       |
|-------|----------|-------|-------|-------|-------|
| 55112 | FLJ10300 | 0.00  | 0.00  | -0.05 | 0.31  |
| 55113 | FLJ10307 | 0.00  | 0.00  | 0.00  | NaN   |
| 55114 | RICH1    | 0.00  | 0.00  | 0.00  | NaN   |
| 55116 | FLJ10315 | 0.00  | 0.00  | 0.00  | NaN   |
| 55117 | NTT73    | 0.00  | 0.13  | 0.00  | -0.08 |
| 55118 | CRTAC1   | 0.00  | 0.00  | -0.05 | 0.02  |
| 55119 | FLJ10330 | 0.00  | 0.00  | 0.00  | NaN   |
| 55120 | FLJ10335 | 0.00  | 0.00  | 0.00  | NaN   |
| 55122 | FLJ10342 | 0.00  | 0.00  | 0.00  | NaN   |
| 55124 | PIWIL2   | -0.09 | -0.25 | -0.10 | -0.10 |
| 55127 | FLJ10359 | 0.09  | 0.13  | 0.00  | 0.35  |
| 55128 | SS-56    | 0.00  | -0.13 | 0.00  | 0.01  |
| 55129 | FLJ10375 | 0.00  | 0.00  | -0.05 | 0.31  |
| 55130 | FLJ10376 | -0.09 | 0.00  | 0.00  | -0.10 |
| 55131 | FLJ10377 | 0.00  | 0.25  | 0.00  | 0.51  |
| 55133 | FLJ10379 | 0.00  | 0.00  | 0.00  | NaN   |
| 55135 | FLJ10385 | 0.00  | 0.00  | 0.05  | 0.39  |
| 55138 | FLJ10408 | -0.09 | 0.00  | 0.00  | -0.14 |
| 55139 | FLJ10415 | 0.00  | 0.00  | 0.00  | NaN   |
| 55140 | FLJ10422 | -0.09 | -0.50 | -0.10 | 0.49  |
| 55142 | FLJ10460 | 0.00  | 0.00  | 0.00  | NaN   |
| 55143 | FLJ10468 | 0.00  | 0.00  | 0.00  | NaN   |
| 55144 | LRRC5    | 0.00  | 0.00  | 0.05  | 0.16  |
| 55145 | FLJ10477 | 0.09  | 0.00  | -0.05 | 0.39  |
| 55146 | ZDHHC4   | 0.00  | 0.00  | 0.10  | 0.39  |
| 55147 | FLJ10482 | 0.00  | 0.00  | 0.00  | NaN   |
| 55148 | FLJ10483 | 0.00  | 0.00  | 0.00  | NaN   |
| 55149 | FLJ10486 | -0.09 | -0.13 | 0.05  | 0.54  |
| 55150 | FLJ10490 | 0.09  | 0.00  | 0.00  | 0.07  |
| 55151 | FLJ10493 | 0.00  | 0.00  | 0.00  | NaN   |
| 55152 | FLJ10496 | -0.09 | 0.00  | -0.05 | 0.09  |
| 55153 | FLJ10498 | 0.00  | 0.00  | 0.00  | NaN   |
| 55154 | FLJ10504 | 0.09  | 0.13  | 0.00  | 0.32  |
| 55156 | FLJ10511 | 0.00  | 0.00  | 0.05  | 0.30  |
| 55157 | FLJ10514 | 0.00  | 0.00  | 0.00  | NaN   |
| 55159 | FLJ10520 | 0.00  | 0.00  | 0.05  | 0.46  |
| 55160 | FLJ10521 | -0.09 | 0.00  | 0.00  | 0.03  |
| 55161 | FLJ10525 | 0.00  | 0.00  | 0.00  | NaN   |
| 55163 | FLJ10535 | 0.00  | 0.00  | 0.00  | 0.19  |
| 55164 | FLJ10539 | -0.09 | 0.00  | -0.05 | 0.30  |
| 55165 | FLJ10540 | 0.00  | 0.00  | 0.00  | NaN   |
| 55166 | FLJ10545 | 0.00  | 0.00  | 0.00  | NaN   |
| 55167 | FLJ10546 | 0.00  | 0.00  | 0.00  | NaN   |
| 55168 | MRPS18A  | 0.00  | 0.00  | 0.00  | NaN   |
| 55171 | FLJ10560 | 0.09  | 0.00  | 0.05  | 0.62  |
| 55172 | FLJ10563 | 0.00  | 0.00  | 0.00  | NaN   |
| 55173 | MRPS10   | 0.00  | 0.00  | 0.05  | 0.26  |

|       |          |       |       |       |       |
|-------|----------|-------|-------|-------|-------|
| 55175 | FLJ10572 | 0.00  | 0.13  | 0.00  | 0.18  |
| 55176 | FLJ10578 | 0.00  | 0.00  | 0.00  | NaN   |
| 55177 | FLJ10579 | 0.00  | 0.00  | 0.00  | NaN   |
| 55178 | FLJ10581 | 0.00  | -0.13 | 0.00  | 0.07  |
| 55179 | FLJ10582 | 0.00  | 0.00  | 0.00  | NaN   |
| 55180 | FLJ10583 | 0.00  | 0.00  | 0.00  | NaN   |
| 55181 | FLJ10587 | 0.18  | 0.13  | 0.00  | 0.68  |
| 55182 | FLJ10597 | 0.00  | 0.00  | 0.00  | NaN   |
| 55184 | C20orf12 | 0.00  | 0.00  | 0.00  | NaN   |
| 55186 | FLJ10618 | 0.00  | 0.00  | 0.00  | NaN   |
| 55187 | FLJ10619 | 0.00  | 0.00  | 0.00  | NaN   |
| 55188 | FLJ10620 | 0.00  | 0.00  | 0.00  | NaN   |
| 55191 | FLJ10631 | 0.00  | 0.00  | 0.00  | 0.46  |
| 55192 | FLJ10634 | 0.00  | 0.00  | 0.00  | NaN   |
| 55193 | PB1      | -0.09 | -0.25 | -0.10 | 0.47  |
| 55194 | FLJ10647 | 0.00  | 0.00  | 0.00  | NaN   |
| 55195 | FLJ10650 | 0.00  | 0.00  | 0.00  | NaN   |
| 55196 | FLJ10652 | 0.00  | 0.00  | 0.00  | NaN   |
| 55197 | FLJ10656 | 0.09  | -0.13 | -0.25 | 0.42  |
| 55200 | FLJ10665 | -0.09 | 0.00  | 0.00  | -0.01 |
| 55201 | C19orf5  | -0.09 | 0.00  | 0.00  | 0.15  |
| 55203 | FLJ10675 | 0.00  | 0.00  | -0.05 | -0.13 |
| 55204 | FLJ10687 | 0.00  | 0.13  | 0.05  | 0.51  |
| 55205 | FLJ10697 | -0.09 | 0.00  | -0.15 | 0.43  |
| 55206 | FLJ10701 | 0.00  | 0.00  | 0.00  | NaN   |
| 55207 | FLJ10702 | 0.00  | 0.00  | 0.05  | 0.06  |
| 55208 | FLJ10704 | -0.09 | -0.13 | -0.05 | 0.21  |
| 55209 | FLJ10707 | 0.00  | 0.00  | 0.00  | NaN   |
| 55210 | FLJ10709 | 0.00  | 0.13  | 0.00  | -0.29 |
| 55211 | FLJ10713 | 0.00  | 0.00  | 0.00  | NaN   |
| 55212 | FLJ10715 | 0.00  | 0.00  | 0.00  | NaN   |
| 55213 | FLJ10716 | 0.00  | 0.13  | 0.00  | -0.16 |
| 55214 | FLJ10718 | 0.00  | 0.00  | 0.05  | 0.25  |
| 55215 | FLJ10719 | 0.00  | 0.00  | -0.05 | 0.51  |
| 55216 | FLJ10726 | 0.00  | 0.00  | 0.00  | NaN   |
| 55218 | FLJ10738 | 0.00  | 0.00  | 0.00  | NaN   |
| 55219 | FLJ10747 | -0.09 | 0.00  | 0.00  | -0.06 |
| 55220 | FLJ10748 | 0.00  | 0.13  | 0.00  | -0.04 |
| 55222 | FLJ10751 | 0.00  | 0.00  | 0.00  | NaN   |
| 55223 | FLJ10759 | 0.00  | 0.00  | 0.00  | NaN   |
| 55224 | FLJ10761 | 0.00  | 0.13  | 0.00  | 0.30  |
| 55225 | KIAA1579 | 0.00  | 0.00  | -0.05 | 0.18  |
| 55226 | FLJ10774 | 0.00  | 0.00  | 0.05  | 0.48  |
| 55227 | LANO     | 0.00  | 0.00  | 0.00  | NaN   |
| 55228 | FLJ10781 | 0.09  | 0.13  | 0.00  | 0.03  |
| 55229 | FLJ10782 | 0.09  | 0.00  | 0.00  | -0.07 |
| 55231 | FLJ10786 | 0.00  | 0.00  | 0.05  | 0.26  |

|       |          |       |       |       |       |
|-------|----------|-------|-------|-------|-------|
| 55233 | C2orf6   | 0.00  | 0.00  | 0.00  | NaN   |
| 55234 | SMU-1    | -0.09 | 0.00  | 0.05  | 0.22  |
| 55236 | FLJ10808 | 0.00  | 0.00  | 0.00  | NaN   |
| 55237 | FLJ10811 | 0.00  | 0.00  | 0.00  | NaN   |
| 55238 | FLJ10815 | 0.00  | 0.00  | 0.00  | NaN   |
| 55239 | FLJ10826 | 0.00  | 0.00  | 0.00  | NaN   |
| 55240 | FLJ10829 | 0.00  | 0.00  | 0.00  | NaN   |
| 55243 | KIRREL   | 0.00  | 0.00  | 0.00  | NaN   |
| 55244 | FLJ10847 | 0.00  | -0.13 | 0.00  | 0.11  |
| 55245 | C20orf44 | 0.00  | 0.13  | 0.00  | 0.35  |
| 55246 | FLJ10853 | -0.09 | -0.25 | -0.10 | 0.42  |
| 55247 | FLJ10858 | 0.00  | 0.00  | -0.10 | 0.19  |
| 55248 | FLJ10874 | 0.00  | 0.00  | 0.00  | NaN   |
| 55249 | YAP      | 0.50  | 0.50  | 0.00  | 0.38  |
| 55252 | FLJ10898 | 0.09  | 0.00  | 0.00  | 0.49  |
| 55253 | FLJ10900 | -0.09 | 0.00  | 0.00  | 0.29  |
| 55254 | FLJ10902 | 0.00  | 0.00  | 0.00  | NaN   |
| 55255 | FLJ10904 | 0.00  | 0.00  | 0.00  | NaN   |
| 55256 | SIPL     | 0.00  | 0.00  | 0.00  | NaN   |
| 55257 | C20orf20 | 0.09  | 0.13  | 0.00  | 0.00  |
| 55258 | FLJ10916 | 0.00  | 0.00  | -0.05 | 0.27  |
| 55259 | FLJ10921 | 0.00  | 0.00  | 0.00  | NaN   |
| 55260 | FLJ10922 | 0.09  | 0.00  | 0.00  | 0.23  |
| 55262 | FLJ10925 | 0.18  | 0.00  | 0.00  | 0.29  |
| 55266 | FLJ10936 | 0.09  | 0.00  | 0.00  | 0.12  |
| 55267 | FLJ10945 | 0.00  | 0.00  | 0.00  | NaN   |
| 55268 | FLJ10948 | 0.00  | 0.00  | 0.00  | NaN   |
| 55269 | PSP1     | 0.00  | 0.00  | -0.15 | 0.46  |
| 55270 | FLJ10956 | 0.00  | 0.00  | 0.00  | NaN   |
| 55273 | FLJ10970 | 0.00  | 0.00  | 0.00  | -0.33 |
| 55274 | XAP135   | 0.00  | 0.00  | 0.00  | NaN   |
| 55275 | FLJ10979 | 0.00  | -0.13 | 0.00  | 0.15  |
| 55277 | FLJ10986 | 0.00  | 0.00  | -0.05 | 0.03  |
| 55278 | FLJ10989 | 0.00  | 0.00  | 0.10  | 0.64  |
| 55279 | FLJ10997 | -0.09 | 0.00  | 0.05  | 0.36  |
| 55280 | FLJ10998 | 0.00  | -0.13 | -0.05 | 0.40  |
| 55281 | FLJ11000 | 0.00  | 0.00  | 0.00  | NaN   |
| 55282 | FLJ11004 | -0.09 | 0.00  | 0.05  | 0.47  |
| 55283 | MCOLN3   | 0.00  | 0.00  | 0.05  | -0.04 |
| 55284 | FLJ11011 | 0.00  | 0.25  | 0.00  | 0.35  |
| 55286 | FLJ11017 | 0.00  | 0.13  | 0.00  | 0.16  |
| 55287 | FLJ11036 | 0.00  | 0.00  | 0.00  | NaN   |
| 55288 | FLJ11040 | 0.00  | 0.00  | 0.00  | NaN   |
| 55289 | FLJ11042 | 0.00  | 0.00  | 0.00  | NaN   |
| 55291 | C11orf23 | 0.36  | 0.00  | 0.00  | 0.60  |
| 55293 | FLJ11068 | 0.00  | 0.00  | 0.00  | NaN   |
| 55294 | FBXW7    | 0.00  | 0.00  | 0.50  | 0.29  |

|       |             |       |       |       |       |
|-------|-------------|-------|-------|-------|-------|
| 55295 | FLJ11078    | 0.00  | 0.00  | 0.00  | NaN   |
| 55296 | FLJ11082    | 0.00  | 0.00  | -0.05 | 0.11  |
| 55297 | FLJ11088    | 0.00  | 0.00  | -0.05 | 0.25  |
| 55298 | FLJ11099    | 0.00  | -0.13 | 0.00  | 0.05  |
| 55299 | BRIX        | 0.00  | 0.00  | 0.15  | 0.40  |
| 55301 | FLJ11106    | 0.00  | 0.00  | 0.00  | NaN   |
| 55303 | HIMAP4      | 0.00  | 0.00  | -0.05 | -0.05 |
| 55304 | C20orf38    | 0.00  | 0.00  | 0.00  | NaN   |
| 55308 | FLJ11126    | -0.09 | -0.13 | 0.05  | 0.53  |
| 55311 | FLJ11137    | 0.09  | 0.13  | 0.00  | 0.35  |
| 55312 | FLJ11149    | 0.00  | 0.00  | -0.05 | 0.15  |
| 55313 | FLJ11151    | 0.00  | 0.00  | 0.00  | NaN   |
| 55314 | FLJ11155    | 0.00  | 0.00  | 0.00  | 0.00  |
| 55315 | FLJ11160    | 0.09  | 0.00  | 0.00  | -0.01 |
| 55316 | FLJ11164    | 0.00  | 0.25  | 0.00  | 0.43  |
| 55317 | C20orf29    | 0.00  | 0.00  | -0.05 | 0.22  |
| 55319 | FLJ11184    | 0.00  | 0.00  | 0.00  | NaN   |
| 55320 | FLJ11186    | 0.00  | 0.00  | 0.00  | NaN   |
| 55321 | C20orf46    | 0.00  | 0.00  | 0.00  | NaN   |
| 55322 | FLJ11193    | 0.00  | 0.00  | 0.15  | 0.43  |
| 55323 | FLJ11196    | 0.00  | 0.00  | 0.00  | NaN   |
| 55324 | FLJ11198    | 0.09  | 0.00  | 0.00  | 0.47  |
| 55325 | FLJ11200    | 0.00  | 0.00  | -0.05 | 0.26  |
| 55326 | FLJ11210    | -0.09 | -0.38 | -0.10 | 0.40  |
| 55327 | LIN-7-C     | 0.00  | 0.00  | 0.00  | NaN   |
| 55328 | FLJ11218    | 0.09  | 0.00  | -0.05 | 0.17  |
| 55329 | FLJ11222    | 0.00  | 0.00  | 0.05  | 0.02  |
| 55332 | FLJ11259    | 0.00  | 0.00  | 0.00  | NaN   |
| 55333 | FLJ11271    | 0.00  | 0.00  | 0.00  | NaN   |
| 55334 | FLJ11274    | 0.00  | 0.00  | 0.00  | NaN   |
| 55335 | FLJ11275    | 0.00  | 0.00  | 0.00  | NaN   |
| 55336 | FBXL8       | -0.09 | 0.00  | 0.00  | 0.30  |
| 55337 | FLJ11286    | 0.00  | 0.00  | 0.05  | 0.62  |
| 55339 | FLJ11294    | 0.00  | 0.00  | -0.05 | 0.28  |
| 55340 | IAN4L1      | 0.00  | 0.00  | -0.05 | 0.19  |
| 55341 | FLJ11301    | 0.09  | 0.00  | 0.00  | 0.44  |
| 55343 | FLJ11320    | 0.09  | 0.00  | 0.00  | 0.17  |
| 55346 | FLJ11336    | 0.00  | 0.00  | 0.00  | NaN   |
| 55347 | FLJ11342    | 0.00  | 0.00  | 0.00  | NaN   |
| 55350 | VNN3        | 0.00  | 0.00  | 0.00  | NaN   |
| 55351 | HSA250839   | 0.00  | -0.13 | -0.15 | -0.27 |
| 55353 | LC27        | 0.00  | 0.00  | 0.00  | NaN   |
| 55355 | DKFZp762E13 | 0.00  | 0.00  | 0.00  | NaN   |
| 55357 | TBC1D2      | 0.00  | 0.00  | 0.00  | NaN   |
| 55359 | DKFZp761P10 | -0.09 | 0.00  | 0.00  | 0.11  |
| 55361 | PI4KII      | 0.00  | 0.00  | -0.05 | 0.06  |
| 55364 | IMPACT      | 0.00  | 0.00  | -0.15 | 0.42  |

|       |             |       |       |       |       |
|-------|-------------|-------|-------|-------|-------|
| 55365 | HCA112      | 0.00  | 0.00  | -0.05 | 0.10  |
| 55366 | GPR48       | 0.00  | 0.00  | 0.00  | NaN   |
| 55367 | LRDD        | -0.18 | -0.13 | -0.05 | 0.14  |
| 55374 | PRO1580     | 0.00  | 0.00  | 0.00  | NaN   |
| 55384 | MEG3        | 0.00  | 0.00  | 0.00  | NaN   |
| 55388 | MCM10       | 0.00  | 0.00  | 0.00  | NaN   |
| 55389 | PRO2266     | 0.00  | 0.00  | 0.00  | NaN   |
| 55421 | HSA277841   | 0.00  | 0.00  | 0.00  | NaN   |
| 55422 | ZNF361      | 0.09  | 0.00  | -0.05 | 0.52  |
| 55423 | SIRPB2      | 0.00  | 0.00  | 0.50  | -0.23 |
| 55425 | LSR7        | 0.00  | 0.00  | -0.05 | 0.17  |
| 55435 | PRO0971     | 0.00  | 0.00  | 0.00  | NaN   |
| 55450 | PRO1489     | -0.09 | 0.00  | 0.00  | 0.01  |
| 55454 | PRO0082     | 0.00  | 0.00  | 0.00  | NaN   |
| 55466 | DNAJA4      | 0.00  | 0.00  | 0.00  | NaN   |
| 55471 | PRO1853     | 0.00  | 0.00  | 0.00  | NaN   |
| 55472 | PRO1905     | 0.00  | -0.13 | 0.00  | -0.22 |
| 55486 | PARL        | 0.09  | 0.00  | 0.00  | 0.42  |
| 55500 | EKI1        | 0.00  | 0.00  | 0.00  | NaN   |
| 55501 | C4S-2       | 0.00  | 0.13  | 0.05  | 0.37  |
| 55505 | NOLA3       | 0.00  | 0.00  | 0.00  | NaN   |
| 55506 | H2AFY2      | 0.00  | 0.00  | 0.00  | NaN   |
| 55507 | GPRC5D      | -0.09 | 0.00  | 0.00  | -0.18 |
| 55508 | BLOV1       | 0.09  | 0.13  | 0.00  | 0.57  |
| 55509 | SNFT        | 0.00  | 0.00  | 0.00  | NaN   |
| 55510 | HAGE        | 0.00  | 0.00  | 0.05  | 0.27  |
| 55515 | ASIC4       | 0.00  | 0.00  | 0.00  | NaN   |
| 55520 | ELAC1       | -0.09 | -0.13 | -0.25 | 0.12  |
| 55521 | TRIM36      | 0.00  | 0.00  | 0.00  | NaN   |
| 55526 | KIAA1630    | 0.00  | 0.00  | 0.00  | NaN   |
| 55532 | DKFZp547M23 | 0.09  | 0.00  | 0.05  | 0.05  |
| 55539 | HSA404617   | 0.00  | -0.13 | -0.05 | 0.03  |
| 55540 | IL17BR      | 0.00  | 0.00  | -0.10 | 0.21  |
| 55554 | KLK15       | 0.00  | -0.13 | 0.00  | -0.59 |
| 55556 | HSRTSBETA   | 0.00  | 0.00  | 0.00  | NaN   |
| 55565 | LOC55565    | 0.00  | 0.00  | 0.05  | 0.01  |
| 55568 | DKFZp586H06 | 0.00  | 0.00  | 0.00  | NaN   |
| 55573 | H41         | 0.00  | 0.00  | 0.00  | NaN   |
| 55576 | STAB2       | 0.00  | 0.00  | 0.00  | NaN   |
| 55577 | NAGK        | 0.00  | 0.00  | 0.00  | NaN   |
| 55578 | P38IP       | 0.00  | 0.00  | 0.00  | NaN   |
| 55584 | CHRNA9      | 0.00  | 0.00  | 0.00  | NaN   |
| 55585 | HSA243666   | 0.09  | 0.25  | 0.00  | 0.38  |
| 55589 | BIKE        | 0.00  | 0.00  | 0.00  | NaN   |
| 55591 | VEZATIN     | 0.00  | 0.13  | 0.05  | -0.10 |
| 55592 | DKFZp434M03 | 0.00  | 0.00  | 0.00  | NaN   |
| 55596 | DKFZp434E22 | 0.00  | -0.13 | 0.00  | 0.31  |



|       |          |       |       |       |       |
|-------|----------|-------|-------|-------|-------|
| 55601 | FLJ20035 | 0.00  | 0.00  | -0.05 | 0.09  |
| 55602 | FLJ20036 | 0.00  | 0.00  | -0.05 | 0.18  |
| 55603 | FLJ20037 | 0.00  | 0.00  | 0.00  | NaN   |
| 55604 | FLJ20048 | 0.00  | 0.00  | 0.05  | -0.09 |
| 55607 | PPP1R9A  | 0.18  | 0.00  | 0.00  | 0.22  |
| 55608 | FLJ20093 | -0.09 | -0.13 | 0.00  | 0.21  |
| 55610 | FLJ20097 | 0.18  | 0.00  | 0.00  | 0.30  |
| 55611 | FLJ20113 | 0.00  | 0.00  | 0.00  | NaN   |
| 55612 | C20orf42 | 0.00  | 0.00  | 0.00  | NaN   |
| 55616 | UPLC1    | -0.09 | 0.00  | 0.00  | 0.13  |
| 55617 | C20orf13 | 0.00  | 0.00  | 0.00  | NaN   |
| 55619 | FLJ20220 | 0.00  | 0.00  | 0.00  | NaN   |
| 55620 | FLJ20234 | 0.00  | 0.00  | 0.00  | NaN   |
| 55621 | FLJ20244 | 0.00  | 0.00  | 0.00  | NaN   |
| 55622 | FLJ20272 | 0.00  | 0.00  | 0.00  | NaN   |
| 55623 | FLJ20274 | 0.00  | 0.00  | 0.00  | NaN   |
| 55624 | FLJ20277 | 0.00  | 0.00  | 0.00  | NaN   |
| 55625 | ZDHHC7   | -0.09 | 0.00  | -0.05 | 0.41  |
| 55626 | FLJ20294 | 0.00  | 0.00  | 0.00  | NaN   |
| 55627 | FLJ20297 | 0.00  | 0.00  | -0.05 | 0.55  |
| 55628 | FLJ20307 | -0.09 | 0.00  | -0.25 | 0.34  |
| 55629 | FLJ20312 | -0.09 | 0.00  | 0.00  | 0.21  |
| 55630 | SLC39A4  | 0.18  | 0.13  | 0.15  | 0.35  |
| 55631 | FLJ20331 | 0.00  | 0.00  | 0.00  | NaN   |
| 55635 | FLJ20354 | 0.00  | 0.00  | 0.00  | NaN   |
| 55638 | FLJ20366 | 0.18  | 0.00  | 0.05  | 0.19  |
| 55640 | FLJ20371 | 0.00  | 0.00  | 0.00  | NaN   |
| 55643 | BTBD2    | 0.00  | 0.00  | 0.00  | NaN   |
| 55644 | OSGEP    | 0.00  | 0.00  | 0.00  | NaN   |
| 55647 | RAB20    | -0.09 | -0.13 | 0.00  | 0.02  |
| 55650 | FLJ20477 | -0.09 | -0.13 | 0.05  | 0.06  |
| 55651 | NOLA2    | 0.18  | 0.00  | 0.00  | 0.46  |
| 55652 | FLJ20489 | 0.00  | 0.00  | 0.00  | NaN   |
| 55653 | BCAS4    | 0.18  | 0.13  | 0.00  | 0.43  |
| 55654 | FLJ20507 | 0.00  | 0.00  | 0.00  | NaN   |
| 55655 | NALP2    | 0.09  | 0.00  | 0.00  | 0.08  |
| 55656 | FLJ20530 | 0.00  | -0.13 | 0.00  | 0.62  |
| 55657 | FLJ20531 | 0.00  | 0.00  | 0.00  | NaN   |
| 55658 | FLJ20552 | 0.00  | 0.00  | -0.05 | 0.16  |
| 55660 | FNBP3    | 0.00  | 0.00  | 0.00  | NaN   |
| 55661 | DDX27    | 0.09  | 0.00  | 0.05  | 0.05  |
| 55662 | HIF1AN   | 0.00  | -0.13 | -0.05 | 0.17  |
| 55663 | FLJ20626 | 0.00  | 0.13  | 0.10  | 0.32  |
| 55664 | HARC     | -0.09 | -0.13 | -0.15 | 0.63  |
| 55665 | URG4     | 0.00  | 0.00  | 0.00  | NaN   |
| 55666 | NPL4     | 0.00  | 0.00  | 0.00  | NaN   |
| 55667 | FLJ20686 | 0.00  | -0.25 | -0.10 | 0.25  |

|       |          |       |       |       |       |
|-------|----------|-------|-------|-------|-------|
| 55668 | FLJ20689 | 0.00  | 0.00  | 0.00  | NaN   |
| 55669 | MFN1     | 0.09  | 0.00  | 0.05  | 0.43  |
| 55670 | FLJ20695 | 0.09  | 0.00  | 0.00  | 0.41  |
| 55671 | FLJ20707 | 0.00  | 0.13  | 0.00  | 0.07  |
| 55672 | FLJ20719 | 0.09  | 0.00  | -0.05 | 0.43  |
| 55679 | FLJ10044 | 0.00  | 0.00  | -0.05 | 0.00  |
| 55680 | Rabip4R  | 0.00  | 0.00  | 0.00  | NaN   |
| 55683 | FLJ10081 | 0.00  | 0.00  | 0.00  | NaN   |
| 55684 | FLJ10101 | 0.00  | 0.00  | 0.00  | NaN   |
| 55686 | FLJ10116 | 0.00  | 0.00  | 0.00  | NaN   |
| 55689 | FLJ10201 | 0.09  | 0.00  | 0.00  | -0.08 |
| 55691 | FLJ10210 | 0.00  | 0.00  | 0.00  | NaN   |
| 55692 | LUC7L    | 0.00  | 0.00  | -0.05 | 0.10  |
| 55693 | FLJ10251 | -0.09 | 0.13  | -0.10 | 0.23  |
| 55695 | NOL1R    | -0.09 | 0.00  | 0.00  | 0.28  |
| 55696 | FLJ10290 | 0.00  | 0.00  | 0.00  | NaN   |
| 55697 | FLJ10305 | 0.09  | -0.13 | 0.05  | 0.41  |
| 55699 | FLJ10326 | 0.09  | 0.00  | 0.05  | 0.47  |
| 55700 | FLJ10350 | 0.00  | 0.00  | 0.00  | NaN   |
| 55701 | FLJ10357 | 0.00  | 0.00  | 0.00  | NaN   |
| 55702 | FLJ10374 | 0.00  | 0.00  | 0.00  | NaN   |
| 55703 | FLJ10388 | 0.00  | 0.00  | 0.00  | NaN   |
| 55704 | FLJ10392 | 0.09  | 0.00  | 0.00  | -0.26 |
| 55705 | FLJ10402 | 0.00  | 0.00  | 0.00  | NaN   |
| 55706 | FLJ10407 | 0.00  | 0.00  | 0.00  | NaN   |
| 55707 | FLJ10420 | 0.00  | 0.00  | 0.00  | NaN   |
| 55709 | FLJ10450 | 0.00  | 0.00  | 0.00  | NaN   |
| 55711 | FLJ10462 | 0.00  | 0.00  | 0.00  | NaN   |
| 55713 | ZNF334   | 0.00  | 0.00  | 0.00  | NaN   |
| 55715 | DOK4     | -0.09 | 0.00  | 0.00  | 0.12  |
| 55716 | LIMR     | 0.00  | 0.00  | 0.00  | NaN   |
| 55718 | FLJ10509 | 0.00  | 0.00  | 0.00  | NaN   |
| 55719 | FLJ10512 | 0.00  | -0.13 | -0.05 | 0.26  |
| 55720 | FLJ10534 | 0.00  | -0.13 | 0.00  | 0.13  |
| 55721 | FLJ10547 | 0.00  | 0.00  | 0.00  | NaN   |
| 55722 | FLJ10565 | 0.00  | 0.13  | 0.10  | 0.54  |
| 55723 | FLJ10604 | 0.00  | 0.00  | 0.00  | NaN   |
| 55726 | FLJ10637 | 0.00  | 0.00  | 0.00  | NaN   |
| 55727 | FLJ10648 | 0.00  | 0.00  | 0.00  | NaN   |
| 55729 | FLJ10688 | -0.09 | 0.00  | 0.00  | 0.09  |
| 55731 | FLJ10700 | 0.00  | 0.38  | 0.00  | 0.57  |
| 55732 | FLJ10706 | 0.00  | 0.00  | 0.00  | NaN   |
| 55733 | FLJ10724 | 0.00  | 0.00  | 0.00  | NaN   |
| 55734 | ZFP64    | 0.00  | 0.13  | 0.05  | 0.36  |
| 55735 | FLJ10737 | 0.00  | 0.00  | 0.00  | NaN   |
| 55737 | VPS35    | -0.09 | 0.00  | -0.05 | 0.29  |
| 55739 | FLJ10769 | -0.09 | -0.13 | 0.00  | 0.46  |

|       |           |       |       |       |       |
|-------|-----------|-------|-------|-------|-------|
| 55740 | FLJ10773  | 0.09  | 0.00  | 0.00  | 0.14  |
| 55741 | C20orf31  | 0.00  | 0.13  | 0.00  | 0.43  |
| 55742 | PARVA     | 0.00  | 0.00  | 0.00  | NaN   |
| 55743 | CHFR      | 0.00  | 0.00  | 0.00  | NaN   |
| 55744 | FLJ10803  | 0.00  | 0.00  | 0.00  | NaN   |
| 55745 | FLJ10813  | 0.00  | 0.00  | 0.05  | 0.16  |
| 55746 | NUP133    | 0.09  | 0.00  | 0.00  | 0.27  |
| 55748 | FLJ10830  | -0.09 | 0.00  | -0.25 | 0.61  |
| 55750 | FLJ10842  | 0.00  | 0.00  | 0.00  | NaN   |
| 55751 | FLJ10846  | 0.00  | 0.13  | 0.00  | 0.55  |
| 55752 | FLJ10849  | 0.00  | 0.00  | 0.00  | NaN   |
| 55753 | FLJ10851  | 0.00  | 0.00  | 0.00  | NaN   |
| 55754 | FLJ10856  | 0.00  | 0.00  | 0.05  | 0.19  |
| 55755 | C48       | 0.00  | 0.00  | 0.00  | NaN   |
| 55756 | FLJ10871  | -0.09 | -0.25 | -0.05 | 0.40  |
| 55757 | UGCGL2    | -0.09 | 0.00  | -0.05 | 0.21  |
| 55758 | FLJ10876  | 0.00  | 0.00  | 0.00  | NaN   |
| 55759 | WDR12     | 0.00  | 0.00  | 0.00  | NaN   |
| 55760 | DDX32     | 0.00  | 0.00  | -0.05 | 0.26  |
| 55761 | FLJ10890  | 0.00  | 0.00  | 0.00  | NaN   |
| 55762 | FLJ10891  | 0.09  | 0.00  | -0.05 | 0.27  |
| 55764 | WDR10     | 0.00  | 0.00  | 0.00  | NaN   |
| 55765 | FLJ10901  | 0.00  | 0.00  | 0.00  | NaN   |
| 55768 | FLJ11005  | 0.00  | 0.00  | 0.00  | NaN   |
| 55769 | ZNF83     | 0.09  | 0.00  | -0.05 | 0.36  |
| 55770 | FLJ11026  | 0.00  | -0.13 | -0.10 | 0.39  |
| 55771 | FLJ11029  | 0.18  | 0.13  | 0.00  | 0.48  |
| 55775 | TDP1      | 0.00  | 0.13  | 0.00  | 0.27  |
| 55776 | FLJ11101  | 0.00  | 0.00  | 0.00  | NaN   |
| 55777 | FLJ11113  | 0.00  | 0.00  | 0.00  | NaN   |
| 55778 | FLJ11132  | 0.00  | 0.00  | 0.00  | NaN   |
| 55779 | FLJ11142  | 0.00  | 0.00  | 0.00  | NaN   |
| 55781 | FLJ11159  | 0.00  | 0.00  | 0.00  | NaN   |
| 55784 | FLJ11175  | 0.00  | 0.00  | 0.00  | NaN   |
| 55785 | FLJ11183  | 0.00  | 0.13  | 0.00  | 0.09  |
| 55786 | FLJ11191  | 0.09  | 0.00  | -0.05 | 0.35  |
| 55788 | FLJ11240  | 0.00  | 0.00  | 0.05  | 0.14  |
| 55790 | ChGn      | 0.00  | -0.13 | -0.05 | 0.01  |
| 55791 | FLJ11269  | 0.09  | 0.00  | 0.00  | 0.05  |
| 55793 | FLJ11280  | 0.00  | 0.00  | 0.05  | -0.11 |
| 55794 | DDX28     | -0.09 | -0.13 | 0.00  | 0.33  |
| 55795 | FLJ11305  | -0.09 | -0.13 | -0.05 | 0.40  |
| 55798 | METL      | 0.50  | 0.50  | 0.00  | 0.09  |
| 55799 | CACNA2D3  | 0.00  | 0.00  | -0.15 | 0.17  |
| 55800 | HSA243396 | 0.00  | 0.00  | -0.05 | 0.13  |
| 55801 | IL26      | 0.09  | 0.00  | -0.05 | 0.03  |
| 55802 | HSA275986 | 0.00  | 0.00  | -0.10 | 0.40  |

|       |             |       |       |       |       |
|-------|-------------|-------|-------|-------|-------|
| 55803 | CENTA2      | 0.00  | 0.00  | 0.00  | NaN   |
| 55805 | DKFZp761001 | 0.00  | 0.00  | -0.05 | 0.04  |
| 55806 | HR          | -0.09 | -0.25 | -0.10 | 0.25  |
| 55810 | FHX         | -0.09 | 0.00  | 0.00  | 0.37  |
| 55811 | SAC         | 0.00  | 0.00  | 0.00  | NaN   |
| 55812 | HSD-3.1     | 0.00  | 0.13  | 0.00  | -0.17 |
| 55813 | HCA66       | 0.00  | 0.00  | 0.00  | NaN   |
| 55816 | C20orf180   | 0.18  | 0.50  | 0.00  | 0.33  |
| 55818 | TSGA        | 0.00  | 0.00  | -0.05 | 0.18  |
| 55819 | GP          | 0.00  | 0.00  | 0.00  | NaN   |
| 55821 | ALLC        | 0.00  | 0.00  | 0.00  | NaN   |
| 55823 | VPS11       | 0.00  | 0.00  | -0.05 | 0.28  |
| 55825 | HSA250303   | 0.00  | 0.00  | 0.00  | NaN   |
| 55827 | PC326       | 0.00  | 0.00  | 0.00  | NaN   |
| 55830 | AD-017      | -0.09 | 0.00  | -0.10 | 0.45  |
| 55831 | LOC55831    | 0.00  | 0.00  | 0.00  | NaN   |
| 55832 | TIP120A     | 0.09  | 0.00  | 0.00  | 0.49  |
| 55833 | LOC55833    | -0.09 | 0.13  | 0.10  | 0.67  |
| 55835 | CENPJ       | 0.00  | -0.13 | -0.15 | 0.44  |
| 55837 | BM036       | 0.00  | 0.00  | 0.00  | NaN   |
| 55839 | BM039       | 0.00  | 0.00  | -0.05 | 0.15  |
| 55840 | BM040       | 0.00  | 0.00  | 0.05  | 0.16  |
| 55843 | BM046       | 0.00  | 0.00  | 0.00  | NaN   |
| 55844 | MDS026      | 0.00  | 0.00  | -0.05 | 0.29  |
| 55846 | MDS028      | 0.00  | 0.00  | 0.05  | 0.27  |
| 55847 | MDS029      | 0.00  | 0.00  | 0.00  | NaN   |
| 55848 | MDS030      | -0.09 | -0.13 | -0.05 | 0.57  |
| 55850 | MDS032      | -0.09 | 0.00  | 0.00  | 0.21  |
| 55851 | MDS033      | 0.00  | 0.00  | 0.00  | NaN   |
| 55852 | HT008       | 0.27  | 0.13  | 0.00  | 0.71  |
| 55853 | HT009       | 0.00  | 0.00  | 0.00  | NaN   |
| 55854 | HT010       | 0.00  | 0.00  | 0.00  | NaN   |
| 55855 | HT011       | 0.00  | 0.00  | -0.05 | 0.31  |
| 55856 | HT012       | 0.00  | 0.00  | 0.05  | 0.60  |
| 55857 | C20orf19    | 0.00  | 0.00  | 0.00  | NaN   |
| 55858 | TPARL       | 0.00  | 0.00  | 0.00  | NaN   |
| 55861 | C20orf35    | 0.00  | 0.00  | 0.00  | NaN   |
| 55862 | LOC55862    | 0.00  | 0.00  | 0.05  | 0.14  |
| 55863 | HT007       | 0.00  | 0.13  | 0.00  | 0.18  |
| 55867 | SLC22A11    | 0.00  | 0.00  | 0.00  | NaN   |
| 55870 | ASH1        | 0.09  | 0.13  | 0.00  | 0.26  |
| 55872 | TOPK        | -0.09 | -0.25 | -0.10 | 0.61  |
| 55876 | PRO2521     | 0.00  | 0.88  | 0.00  | 0.71  |
| 55884 | LOC55884    | 0.00  | -0.13 | 0.00  | 0.39  |
| 55888 | ZFP         | -0.09 | 0.00  | -0.05 | -0.06 |
| 55889 | GLP         | 0.00  | 0.00  | 0.00  | NaN   |
| 55890 | GPRC5C      | 0.00  | 0.13  | 0.00  | 0.35  |

|       |             |       |       |       |       |
|-------|-------------|-------|-------|-------|-------|
| 55891 | LENEP       | 0.09  | 0.13  | 0.00  | 0.05  |
| 55892 | MYNN        | 0.09  | 0.00  | 0.00  | 0.32  |
| 55893 | LOC55893    | -0.09 | -0.50 | -0.10 | 0.36  |
| 55898 | IRO039700   | 0.00  | 0.00  | 0.50  | 0.00  |
| 55900 | ZNF302      | 0.00  | 0.00  | 0.05  | 0.16  |
| 55901 | LOC55901    | 0.00  | 0.00  | 0.00  | NaN   |
| 55905 | ZNF313      | 0.27  | 0.25  | 0.10  | 0.48  |
| 55907 | CMAS        | 0.00  | 0.00  | 0.00  | NaN   |
| 55908 | LOC55908    | 0.09  | 0.00  | 0.00  | -0.17 |
| 55909 | BIN3        | -0.09 | -0.25 | -0.15 | 0.38  |
| 55911 | APOB48R     | 0.00  | 0.00  | 0.00  | NaN   |
| 55914 | ERBB2IP     | 0.00  | 0.00  | -0.05 | 0.04  |
| 55915 | LANCL2      | 0.00  | 0.00  | 0.10  | 0.80  |
| 55917 | DKFZp547A02 | 0.09  | 0.00  | 0.05  | 0.04  |
| 55924 | LOC55924    | 0.09  | 0.00  | 0.00  | 0.26  |
| 55930 | MYO5C       | 0.18  | 0.00  | 0.00  | 0.37  |
| 55937 | G3A         | 0.00  | 0.00  | 0.00  | NaN   |
| 55954 | LOC55954    | -0.09 | 0.00  | 0.00  | 0.06  |
| 55957 | F25965      | 0.00  | 0.00  | 0.00  | NaN   |
| 55958 | KIAA1354    | 0.00  | -0.13 | -0.15 | 0.66  |
| 55966 | MOT8        | 0.00  | 0.00  | 0.00  | NaN   |
| 55968 | NSFL1C      | 0.00  | 0.00  | 0.00  | NaN   |
| 55969 | C20orf24    | 0.00  | -0.13 | 0.00  | 0.47  |
| 55972 | MCFP        | 0.00  | 0.00  | 0.00  | NaN   |
| 55973 | BAP29       | 0.09  | 0.00  | 0.00  | 0.13  |
| 55974 | LOC55974    | 0.27  | 0.13  | 0.00  | 0.67  |
| 55975 | SBBI26      | 0.50  | 0.50  | 0.00  | -0.05 |
| 56005 | IL27        | 0.00  | 0.00  | 0.00  | NaN   |
| 56006 | FLJ12886    | 0.09  | 0.00  | -0.10 | 0.39  |
| 56033 | BARX1       | 0.00  | 0.00  | 0.00  | NaN   |
| 56034 | PDGFC       | 0.00  | 0.00  | 0.00  | 0.06  |
| 56052 | HMT-1       | 0.00  | 0.00  | 0.00  | NaN   |
| 56061 | UBPH        | 0.00  | 0.00  | -0.05 | 0.03  |
| 56100 | PCDHGB6     | 0.00  | 0.00  | 0.00  | NaN   |
| 56101 | PCDHGB5     | 0.00  | 0.00  | 0.00  | NaN   |
| 56105 | PCDHGA11    | 0.00  | 0.00  | 0.00  | NaN   |
| 56106 | PCDHGA10    | 0.00  | 0.00  | 0.00  | NaN   |
| 56107 | PCDHGA9     | 0.00  | 0.00  | 0.00  | NaN   |
| 56112 | PCDHGA3     | 0.00  | 0.00  | 0.00  | NaN   |
| 56114 | PCDHGA1     | 0.00  | 0.00  | 0.00  | NaN   |
| 56123 | PCDHB13     | 0.00  | 0.00  | 0.00  | NaN   |
| 56124 | PCDHB12     | 0.00  | 0.00  | 0.00  | NaN   |
| 56125 | PCDHB11     | 0.00  | 0.00  | 0.00  | NaN   |
| 56128 | PCDHB8      | 0.00  | 0.00  | 0.00  | NaN   |
| 56130 | PCDHB6      | 0.00  | 0.00  | 0.00  | NaN   |
| 56132 | PCDHB3      | 0.00  | 0.00  | 0.05  | -0.18 |
| 56137 | PCDHA12     | 0.00  | 0.00  | 0.00  | NaN   |

|       |              |       |       |       |       |
|-------|--------------|-------|-------|-------|-------|
| 56139 | PCDHA10      | 0.00  | 0.25  | 0.00  | 0.02  |
| 56142 | PCDHA6       | 0.00  | 0.00  | 0.00  | NaN   |
| 56143 | PCDHA5       | 0.00  | 0.00  | 0.00  | NaN   |
| 56145 | PCDHA3       | 0.00  | 0.00  | 0.00  | NaN   |
| 56146 | PCDHA2       | 0.00  | 0.00  | 0.00  | NaN   |
| 56154 | TEX15        | -0.09 | -0.25 | -0.05 | -0.12 |
| 56155 | TEX14        | 0.18  | 0.00  | 0.00  | 0.18  |
| 56158 | TEX12        | 0.00  | 0.00  | 0.00  | NaN   |
| 56163 | RNF17        | 0.00  | -0.13 | -0.15 | 0.08  |
| 56165 | TDRD1        | 0.00  | 0.00  | -0.05 | 0.06  |
| 56171 | DNAH7        | 0.00  | 0.00  | 0.00  | NaN   |
| 56172 | ANKH         | 0.00  | -0.25 | 0.15  | 0.15  |
| 56242 | ZNF253       | 0.00  | 0.00  | 0.00  | NaN   |
| 56244 | BTNL2        | 0.00  | 0.00  | 0.00  | NaN   |
| 56245 | C21orf62     | 0.00  | 0.00  | 0.00  | NaN   |
| 56252 | ZAP3         | 0.00  | 0.00  | 0.00  | NaN   |
| 56253 | CRTAM        | 0.00  | 0.00  | -0.05 | -0.08 |
| 56255 | DJ971N18.2   | 0.00  | 0.00  | 0.05  | 0.29  |
| 56257 | FLJ20257     | 0.18  | 0.00  | 0.00  | 0.36  |
| 56259 | C20orf33     | 0.00  | 0.00  | 0.00  | NaN   |
| 56260 | FLJ11267     | 0.00  | 0.00  | 0.05  | 0.22  |
| 56267 | LOC56267     | 0.00  | 0.00  | -0.05 | 0.10  |
| 56269 | R30953_1     | 0.09  | 0.00  | -0.10 | 0.09  |
| 56270 | LOC56270     | 0.00  | 0.00  | 0.00  | NaN   |
| 56287 | LOC56287     | 0.00  | 0.00  | 0.00  | NaN   |
| 56288 | PARD3        | -0.09 | 0.00  | 0.05  | 0.46  |
| 56300 | IL-1H1       | 0.00  | 0.00  | 0.00  | NaN   |
| 56302 | TRPV5        | 0.00  | 0.00  | -0.05 | 0.14  |
| 56311 | LOC56311     | 0.00  | 0.13  | 0.00  | -0.05 |
| 56339 | M6A          | 0.00  | 0.00  | 0.00  | NaN   |
| 56341 | HRMT1L3      | 0.00  | 0.00  | 0.05  | 0.04  |
| 56344 | CABP5        | 0.09  | 0.00  | 0.00  | 0.06  |
| 56413 | BLTR2        | 0.00  | 0.00  | 0.00  | NaN   |
| 56475 | REPRIMO      | 0.00  | 0.00  | 0.00  | NaN   |
| 56478 | 4E-T         | 0.00  | 0.00  | 0.00  | NaN   |
| 56521 | JDP1         | 0.00  | 0.00  | 0.00  | NaN   |
| 56547 | MMP26        | 0.00  | -0.13 | 0.00  | -0.04 |
| 56603 | P450RAI-2    | 0.00  | 0.00  | 0.00  | NaN   |
| 56604 | TUBB4Q       | 0.00  | 0.00  | 0.05  | 0.03  |
| 56605 | ERO1-L(BETA) | 0.09  | 0.13  | 0.00  | 0.24  |
| 56606 | SLC2A9       | 0.00  | -0.13 | -0.10 | -0.09 |
| 56616 | SMAC         | 0.00  | -0.13 | 0.00  | 0.45  |
| 56647 | BCCIP        | 0.00  | 0.00  | -0.05 | 0.19  |
| 56648 | EIF5A2       | 0.09  | 0.00  | 0.00  | -0.03 |
| 56652 | C10orf2      | 0.00  | -0.13 | -0.05 | 0.07  |
| 56654 | NPDC1        | 0.00  | 0.00  | 0.00  | NaN   |
| 56656 | OR2S2        | -0.09 | 0.00  | 0.10  | -0.21 |

|       |             |       |       |       |       |
|-------|-------------|-------|-------|-------|-------|
| 56659 | KCNK13      | 0.00  | 0.13  | 0.00  | 0.10  |
| 56660 | KCNK12      | 0.00  | 0.00  | 0.00  | NaN   |
| 56672 | C11orf17    | 0.00  | 0.00  | -0.05 | 0.31  |
| 56673 | C11orf16    | 0.00  | 0.00  | -0.05 | 0.04  |
| 56674 | C11orf15    | 0.00  | 0.00  | -0.05 | 0.05  |
| 56675 | C11orf14    | 0.00  | 0.00  | -0.05 | 0.07  |
| 56676 | ASCL3       | 0.00  | 0.00  | -0.05 | 0.00  |
| 56683 | C21orf59    | 0.00  | 0.00  | 0.00  | NaN   |
| 56729 | FIZZ3       | 0.00  | 0.00  | 0.00  | NaN   |
| 56731 | SLC2A4RG    | 0.09  | 0.00  | 0.00  | 0.06  |
| 56829 | FLB6421     | 0.00  | 0.00  | 0.00  | NaN   |
| 56833 | BLAME       | 0.00  | 0.00  | 0.00  | NaN   |
| 56834 | LOC56834    | 0.00  | 0.00  | 0.00  | NaN   |
| 56848 | SPHK2       | 0.09  | 0.00  | 0.00  | 0.16  |
| 56851 | LOC56851    | 0.00  | 0.00  | 0.00  | NaN   |
| 56882 | SPEC1       | 0.00  | 0.00  | 0.05  | 0.04  |
| 56886 | UGCGL1      | 0.00  | 0.00  | -0.05 | 0.18  |
| 56888 | PCMF        | 0.00  | 0.00  | 0.00  | NaN   |
| 56889 | SMBP        | 0.00  | 0.00  | -0.10 | 0.24  |
| 56890 | MDM1        | 0.09  | 0.00  | -0.05 | 0.65  |
| 56891 | LOC56891    | 0.00  | 0.00  | 0.00  | NaN   |
| 56892 | C8orf4      | 0.36  | -0.25 | -0.05 | 0.22  |
| 56893 | C1orf6      | 0.00  | 0.13  | 0.00  | -0.18 |
| 56894 | AGPAT3      | 0.00  | 0.00  | 0.00  | NaN   |
| 56895 | LPAAT-delta | 0.00  | 0.00  | 0.00  | NaN   |
| 56897 | WHIP        | 0.00  | 0.00  | -0.10 | 0.02  |
| 56898 | LOC56898    | 0.00  | 0.00  | 0.00  | NaN   |
| 56899 | LOC56899    | 0.50  | 0.50  | 0.00  | 0.10  |
| 56901 | LOC56901    | 0.00  | 0.00  | 0.00  | NaN   |
| 56902 | LOC56902    | 0.00  | 0.00  | 0.00  | NaN   |
| 56903 | PAPOLB      | 0.00  | 0.00  | 0.10  | -0.03 |
| 56904 | SH3GLB2     | 0.00  | 0.00  | 0.00  | NaN   |
| 56906 | LOC56906    | 0.00  | 0.00  | 0.00  | NaN   |
| 56910 | STARD7      | 0.00  | 0.00  | 0.00  | NaN   |
| 56911 | C21orf7     | 0.00  | 0.00  | 0.00  | NaN   |
| 56912 | LOC56912    | 0.00  | 0.00  | 0.00  | NaN   |
| 56913 | C1GALT1     | 0.00  | 0.00  | 0.05  | 0.12  |
| 56914 | OTOR        | 0.00  | 0.00  | 0.00  | NaN   |
| 56915 | RRP46       | 0.00  | 0.00  | -0.05 | 0.30  |
| 56918 | DKFZp547H02 | 0.00  | 0.00  | -0.05 | 0.33  |
| 56920 | LOC56920    | -0.09 | -0.25 | -0.10 | 0.10  |
| 56922 | MCCC1       | 0.09  | 0.00  | 0.00  | 0.38  |
| 56924 | PAK6        | 0.00  | 0.00  | 0.00  | NaN   |
| 56925 | LXN         | 0.00  | 0.00  | 0.00  | NaN   |
| 56926 | LOC56926    | 0.00  | 0.00  | 0.00  | NaN   |
| 56929 | FEM1A       | 0.00  | 0.13  | 0.00  | 0.59  |
| 56934 | CARPX       | 0.00  | 0.13  | 0.00  | -0.05 |

|       |              |       |       |       |       |
|-------|--------------|-------|-------|-------|-------|
| 56935 | FN5          | 0.00  | 0.00  | -0.05 | 0.00  |
| 56936 | PLPL         | 0.00  | 0.00  | 0.00  | NaN   |
| 56937 | TMEPAI       | 0.18  | 0.63  | 0.00  | 0.46  |
| 56938 | ARNTL2       | 0.00  | 0.00  | 0.00  | NaN   |
| 56940 | MKPX         | 0.00  | 0.00  | -0.05 | 0.17  |
| 56941 | DC12         | 0.00  | 0.00  | 0.00  | NaN   |
| 56942 | DC13         | 0.00  | 0.00  | -0.05 | 0.11  |
| 56943 | DC6          | 0.18  | 0.00  | 0.05  | 0.25  |
| 56944 | HNOEL-iso    | 0.27  | 0.13  | 0.10  | 0.27  |
| 56945 | MRPS22       | 0.00  | 0.00  | 0.00  | NaN   |
| 56946 | C11ORF30     | 0.27  | 0.00  | 0.00  | 0.75  |
| 56947 | GL004        | 0.00  | 0.00  | 0.00  | NaN   |
| 56948 | HCDI         | 0.00  | 0.00  | 0.00  | NaN   |
| 56949 | HCNP         | 0.00  | 0.00  | 0.00  | NaN   |
| 56950 | HSKM-B       | 0.00  | 0.00  | 0.00  | NaN   |
| 56951 | HTGN29       | 0.00  | -0.13 | 0.00  | 0.29  |
| 56953 | NT5M         | 0.00  | 0.00  | 0.00  | NaN   |
| 56954 | NIT2         | 0.00  | 0.00  | 0.00  | NaN   |
| 56955 | MEPE         | 0.00  | 0.00  | 0.00  | NaN   |
| 56957 | CEZANNE      | 0.00  | 0.00  | 0.05  | -0.16 |
| 56965 | LOC56965     | 0.00  | 0.00  | 0.00  | NaN   |
| 56967 | DKFZp761F20  | 0.00  | 0.00  | 0.00  | NaN   |
| 56969 | DKFZp547I014 | 0.09  | 0.00  | -0.05 | 0.10  |
| 56978 | PRDM8        | 0.00  | 0.00  | 0.00  | NaN   |
| 56979 | PRDM9        | 0.00  | 0.00  | 0.10  | -0.08 |
| 56980 | PRDM10       | -0.09 | 0.00  | -0.10 | 0.24  |
| 56981 | PRDM11       | 0.00  | 0.00  | 0.00  | NaN   |
| 56983 | MDS010       | 0.00  | 0.00  | 0.00  | NaN   |
| 56984 | MDS003       | 0.00  | 0.00  | 0.00  | NaN   |
| 56985 | MDS006       | 0.00  | 0.00  | 0.00  | NaN   |
| 56986 | MDS009       | 0.18  | 0.00  | 0.00  | 0.29  |
| 56992 | KNSL7        | -0.09 | 0.00  | -0.05 | 0.20  |
| 56993 | TOMM22       | -0.09 | 0.00  | 0.05  | 0.56  |
| 56994 | CHPT1        | 0.00  | 0.00  | 0.00  | NaN   |
| 56995 | TUSP         | 0.00  | 0.00  | 0.00  | NaN   |
| 56996 | LOC56996     | 0.18  | 0.00  | 0.00  | 0.36  |
| 56997 | CABC1        | 0.09  | 0.00  | 0.00  | 0.18  |
| 56998 | CTNNBIP1     | 0.00  | 0.00  | 0.00  | NaN   |
| 56999 | ADAMTS9      | 0.09  | 0.00  | -0.05 | 0.18  |
| 57001 | DC11         | 0.18  | 0.00  | 0.00  | 0.31  |
| 57003 | GK001        | 0.27  | 0.13  | 0.00  | 0.61  |
| 57007 | RDC1         | 0.00  | 0.00  | -0.05 | 0.09  |
| 57016 | AKR1B10      | 0.00  | 0.00  | 0.00  | NaN   |
| 57019 | LOC57019     | -0.09 | 0.00  | 0.00  | 0.53  |
| 57020 | MGC16824     | 0.00  | 0.00  | 0.00  | NaN   |
| 57030 | SLC17A7      | 0.00  | 0.00  | 0.00  | NaN   |
| 57035 | DJ465N24.2.1 | -0.09 | 0.00  | 0.00  | 0.21  |



|       |             |       |       |       |       |
|-------|-------------|-------|-------|-------|-------|
| 57045 | TSG         | 0.00  | 0.13  | 0.05  | -0.04 |
| 57047 | PLSCR2      | 0.00  | 0.00  | -0.05 | 0.05  |
| 57048 | PLSCR3      | 0.00  | 0.00  | 0.00  | NaN   |
| 57050 | SAS10       | 0.00  | 0.00  | 0.00  | NaN   |
| 57053 | CHRNA10     | 0.00  | -0.13 | 0.00  | 0.09  |
| 57060 | PCBP4       | -0.09 | 0.00  | -0.10 | 0.28  |
| 57062 | DDX24       | 0.00  | 0.00  | 0.00  | NaN   |
| 57082 | AF15Q14     | 0.00  | 0.00  | 0.00  | NaN   |
| 57084 | SLC17A6     | 0.00  | 0.00  | 0.00  | NaN   |
| 57088 | PLSCR4      | 0.00  | 0.00  | -0.05 | 0.07  |
| 57089 | LALP1       | 0.00  | -0.13 | -0.05 | 0.06  |
| 57091 | C20orf32    | 0.09  | 0.50  | 0.00  | 0.09  |
| 57092 | pcnp        | 0.00  | 0.00  | 0.00  | NaN   |
| 57093 | RNF18       | 0.00  | 0.13  | 0.10  | 0.20  |
| 57096 | RPGRIP1     | 0.00  | 0.00  | 0.00  | NaN   |
| 57097 | C12orf6     | -0.09 | 0.00  | 0.05  | -0.13 |
| 57099 | LOC57099    | 0.00  | 0.00  | 0.00  | NaN   |
| 57101 | C12orf3     | -0.09 | 0.00  | 0.00  | 0.05  |
| 57102 | C12orf4     | -0.09 | 0.00  | 0.05  | 0.34  |
| 57103 | C12orf5     | -0.09 | 0.00  | 0.05  | 0.37  |
| 57104 | TTS-2.2     | -0.18 | -0.13 | -0.05 | 0.09  |
| 57105 | LOC57105    | 0.00  | 0.13  | 0.00  | 0.03  |
| 57107 | LOC57107    | 0.00  | 0.00  | 0.10  | 0.70  |
| 57109 | LOC57109    | 0.00  | 0.00  | 0.00  | NaN   |
| 57110 | HRASLS      | 0.18  | 0.00  | 0.05  | -0.07 |
| 57111 | RAB25       | 0.00  | 0.13  | 0.00  | 0.15  |
| 57115 | LOC57115    | 0.00  | 0.00  | 0.00  | NaN   |
| 57116 | LOC57116    | 0.09  | 0.00  | 0.00  | -0.11 |
| 57117 | LOC57117    | 0.00  | 0.00  | 0.00  | NaN   |
| 57118 | LOC57118    | 0.00  | 0.00  | 0.00  | NaN   |
| 57119 | SPINLW1     | 0.00  | 0.00  | 0.00  | NaN   |
| 57122 | NUP107      | 0.09  | 0.13  | 0.00  | 0.37  |
| 57124 | TEM1        | 0.00  | 0.00  | 0.05  | 0.23  |
| 57125 | TEM7        | 0.00  | 0.38  | 0.00  | 0.04  |
| 57126 | PRV1        | 0.09  | 0.00  | -0.10 | 0.19  |
| 57127 | RHBG        | 0.00  | 0.13  | 0.00  | -0.15 |
| 57128 | CGI-203     | 0.00  | 0.00  | 0.00  | NaN   |
| 57130 | CGI-152     | 0.00  | 0.00  | 0.00  | NaN   |
| 57132 | CHMP1.5     | 0.00  | 0.00  | 0.00  | NaN   |
| 57134 | HMIC        | -0.09 | 0.00  | 0.00  | -0.19 |
| 57139 | RGL3        | 0.00  | 0.00  | 0.00  | NaN   |
| 57140 | RNPEPL1     | 0.00  | 0.00  | -0.05 | 0.37  |
| 57142 | RTN4        | 0.09  | 0.00  | -0.05 | 0.40  |
| 57144 | PAK7        | 0.00  | 0.00  | 0.00  | NaN   |
| 57148 | KIAA1219    | 0.00  | -0.13 | 0.00  | 0.26  |
| 57149 | LOC57149    | 0.00  | 0.00  | 0.00  | NaN   |
| 57150 | DKFZP586E19 | 0.00  | 0.00  | 0.00  | NaN   |

|       |              |       |       |       |       |
|-------|--------------|-------|-------|-------|-------|
| 57151 | LOC57151     | 0.00  | 0.00  | 0.00  | -0.01 |
| 57152 | ARS          | 0.18  | 0.13  | 0.05  | 0.02  |
| 57154 | SMURF1       | 0.18  | 0.00  | 0.00  | 0.40  |
| 57157 | DKFZP564F01  | -0.09 | 0.00  | 0.00  | 0.29  |
| 57158 | JPH2         | 0.09  | 0.00  | 0.00  | 0.00  |
| 57161 | PELI2        | 0.00  | 0.00  | 0.05  | 0.05  |
| 57162 | PELI1        | 0.00  | 0.00  | 0.00  | NaN   |
| 57165 | CX46.6       | 0.09  | 0.00  | 0.00  | 0.05  |
| 57171 | LSFR2        | 0.00  | 0.00  | 0.00  | NaN   |
| 57172 | CAMK1G       | 0.00  | 0.00  | 0.00  | NaN   |
| 57175 | DKFZP762I166 | 0.36  | 0.00  | 0.05  | 0.56  |
| 57180 | ARP3BETA     | 0.00  | 0.00  | -0.05 | 0.28  |
| 57184 | FLJ00005     | 0.00  | 0.00  | 0.00  | NaN   |
| 57185 | DJ462O23.2   | -0.09 | 0.00  | 0.00  | -0.05 |
| 57188 | KIAA1233     | 0.00  | 0.00  | -0.05 | 0.04  |
| 57191 | V1RL1        | 0.00  | 0.13  | 0.00  | 0.25  |
| 57192 | MCOLN1       | 0.00  | 0.00  | 0.00  | NaN   |
| 57198 | ATP8B2       | 0.09  | 0.13  | 0.00  | 0.28  |
| 57205 | ATP10D       | 0.00  | 0.00  | 0.00  | NaN   |
| 57209 | LOC57209     | 0.00  | 0.00  | 0.00  | NaN   |
| 57212 | KIAA0495     | 0.00  | 0.00  | 0.00  | NaN   |
| 57213 | C13orf1      | 0.00  | 0.00  | 0.00  | NaN   |
| 57214 | KIAA1199     | 0.00  | 0.00  | 0.00  | NaN   |
| 57215 | HRIHFB2206   | -0.09 | -0.13 | 0.00  | 0.29  |
| 57226 | DJ122O8.2    | 0.00  | 0.00  | 0.00  | NaN   |
| 57228 | LOC57228     | 0.00  | 0.00  | 0.00  | NaN   |
| 57231 | SNX14        | 0.00  | 0.00  | 0.00  | NaN   |
| 57282 | SLC4A10      | 0.00  | 0.00  | -0.05 | 0.05  |
| 57326 | HPIP         | 0.09  | 0.13  | 0.00  | 0.34  |
| 57332 | CBX8         | 0.00  | 0.25  | 0.00  | 0.38  |
| 57335 | ZNF286       | 0.00  | 0.00  | 0.05  | -0.11 |
| 57336 | ZNF287       | 0.00  | 0.00  | 0.00  | NaN   |
| 57337 | SENP7        | 0.00  | 0.00  | 0.00  | NaN   |
| 57338 | JPH3         | -0.09 | -0.13 | -0.05 | -0.22 |
| 57343 | ZNF304       | 0.09  | 0.13  | 0.00  | 0.33  |
| 57348 | TTYH1        | 0.09  | 0.00  | 0.00  | 0.12  |
| 57369 | CX36         | 0.00  | 0.00  | 0.00  | NaN   |
| 57379 | AICDA        | -0.09 | 0.00  | 0.00  | -0.10 |
| 57380 | MRS2L        | 0.00  | 0.00  | 0.00  | NaN   |
| 57402 | LOC57402     | 0.09  | 0.13  | 0.00  | 0.25  |
| 57403 | RAB22A       | 0.18  | 0.50  | 0.00  | 0.60  |
| 57404 | CYP-M        | 0.00  | 0.00  | 0.00  | NaN   |
| 57405 | AD024        | 0.00  | 0.00  | 0.00  | NaN   |
| 57406 | LOC57406     | 0.00  | -0.13 | -0.10 | 0.26  |
| 57408 | HT017        | 0.00  | 0.00  | -0.15 | 0.10  |
| 57415 | HT021        | 0.09  | 0.00  | -0.05 | 0.37  |
| 57418 | WDR18        | 0.00  | 0.00  | 0.00  | NaN   |

|       |           |       |       |       |       |
|-------|-----------|-------|-------|-------|-------|
| 57419 | SLC24A3   | 0.00  | 0.00  | 0.00  | NaN   |
| 57446 | NDRG3     | 0.00  | -0.13 | 0.00  | 0.15  |
| 57447 | NDRG2     | 0.00  | 0.00  | 0.00  | NaN   |
| 57460 | KIAA1157  | 0.00  | 0.00  | 0.00  | NaN   |
| 57466 | KIAA1172  | 0.00  | 0.00  | 0.00  | NaN   |
| 57468 | SLC12A5   | 0.00  | 0.00  | 0.00  | NaN   |
| 57470 | KIAA1185  | 0.00  | 0.00  | 0.00  | NaN   |
| 57472 | KIAA1194  | 0.00  | 0.13  | 0.00  | 0.50  |
| 57473 | KIAA1196  | 0.00  | 0.00  | 0.00  | NaN   |
| 57488 | KIAA1228  | 0.00  | 0.00  | -0.05 | 0.13  |
| 57493 | KIAA1237  | 0.00  | 0.00  | 0.00  | NaN   |
| 57496 | KIAA1243  | 0.00  | 0.00  | 0.00  | NaN   |
| 57498 | KIDINS220 | 0.00  | 0.00  | -0.05 | 0.27  |
| 57509 | ATIP1     | 0.00  | -0.13 | -0.05 | 0.13  |
| 57513 | CASKIN2   | 0.18  | 0.13  | 0.00  | 0.73  |
| 57515 | KIAA1253  | 0.00  | 0.00  | 0.05  | 0.47  |
| 57523 | KIAA1305  | 0.00  | 0.00  | 0.00  | NaN   |
| 57535 | KIAA1324  | 0.00  | 0.00  | 0.05  | 0.01  |
| 57538 | MIDORI    | 0.00  | 0.00  | -0.05 | 0.18  |
| 57551 | KIAA1361  | 0.00  | 0.38  | 0.00  | 0.30  |
| 57556 | SEMA6A    | 0.00  | 0.13  | 0.00  | -0.14 |
| 57570 | KIAA1393  | 0.00  | 0.00  | 0.00  | NaN   |
| 57573 | KIAA1396  | 0.00  | 0.13  | 0.05  | -0.02 |
| 57576 | KIAA1405  | -0.09 | 0.00  | 0.00  | 0.03  |
| 57579 | KIAA1411  | 0.00  | 0.00  | 0.05  | 0.14  |
| 57586 | SYT13     | 0.00  | 0.00  | 0.00  | NaN   |
| 57591 | MKL1      | -0.09 | 0.00  | 0.05  | 0.00  |
| 57596 | KIAA1446  | 0.00  | 0.00  | 0.00  | NaN   |
| 57599 | KIAA1449  | 0.00  | 0.00  | 0.00  | NaN   |
| 57602 | KIAA1453  | 0.00  | 0.38  | 0.00  | 0.29  |
| 57604 | KIAA1456  | 0.00  | -0.25 | -0.10 | 0.02  |
| 57610 | KIAA1464  | -0.09 | -0.13 | 0.00  | 0.21  |
| 57613 | KIAA1467  | -0.09 | 0.00  | 0.00  | 0.18  |
| 57615 | KIAA1473  | 0.00  | -0.13 | -0.05 | 0.18  |
| 57634 | EP400     | 0.00  | 0.00  | 0.00  | NaN   |
| 57645 | KIAA1513  | 0.00  | 0.00  | 0.00  | NaN   |
| 57657 | KIAA1535  | 0.09  | 0.13  | 0.00  | -0.19 |
| 57658 | KIAA1536  | 0.00  | 0.00  | 0.00  | NaN   |
| 57663 | USP29     | 0.09  | 0.13  | 0.00  | 0.23  |
| 57664 | PLEKHA4   | 0.09  | 0.00  | 0.00  | -0.08 |
| 57669 | KIAA1548  | 0.00  | 0.00  | 0.00  | NaN   |
| 57698 | KIAA1598  | 0.00  | 0.00  | -0.05 | 0.14  |
| 57706 | KIAA1608  | 0.00  | 0.00  | 0.00  | NaN   |
| 57707 | KIAA1609  | -0.09 | -0.13 | -0.05 | 0.28  |
| 57710 | KIAA1614  | 0.00  | 0.00  | 0.00  | NaN   |
| 57715 | SEMA4G    | 0.00  | -0.13 | -0.05 | -0.12 |
| 57718 | KIAA1622  | 0.00  | 0.00  | 0.00  | NaN   |

|       |             |       |       |       |       |
|-------|-------------|-------|-------|-------|-------|
| 57720 | GPR107      | 0.00  | 0.00  | 0.00  | NaN   |
| 57728 | KIAA1638    | 0.00  | 0.00  | 0.05  | 0.57  |
| 57730 | KIAA1641    | 0.27  | 0.38  | 0.30  | 0.06  |
| 57731 | SPTBN4      | 0.00  | 0.00  | 0.00  | NaN   |
| 57733 | GLUC        | 0.00  | 0.00  | -0.05 | -0.02 |
| 57758 | CEGP1       | 0.00  | 0.00  | 0.05  | -0.08 |
| 57761 | C20orf97    | 0.00  | 0.00  | 0.05  | -0.17 |
| 57763 | ANKRA2      | 0.00  | 0.00  | 0.00  | NaN   |
| 57786 | RBAK        | 0.00  | 0.00  | 0.10  | -0.11 |
| 57787 | MARKL1      | 0.09  | 0.00  | 0.00  | 0.05  |
| 57794 | DKFZP434E22 | 0.00  | 0.00  | 0.00  | NaN   |
| 57795 | LOC57795    | 0.00  | 0.00  | 0.00  | NaN   |
| 57798 | RG083M05.2  | 0.18  | 0.00  | 0.00  | 0.68  |
| 57799 | RAB40C      | 0.00  | 0.00  | -0.05 | 0.11  |
| 57805 | LOC57805    | -0.09 | -0.25 | -0.15 | 0.07  |
| 57817 | HAMP        | 0.00  | 0.00  | 0.00  | NaN   |
| 57818 | IGRP        | 0.00  | 0.00  | 0.00  | NaN   |
| 57819 | C6orf28     | 0.00  | 0.00  | 0.00  | NaN   |
| 57820 | HEI10       | 0.00  | 0.00  | 0.00  | NaN   |
| 57821 | LOC57821    | 0.00  | 0.00  | -0.05 | -0.06 |
| 57823 | CRACC       | 0.00  | 0.00  | 0.00  | NaN   |
| 57824 | HB-1        | 0.00  | 0.00  | 0.00  | NaN   |
| 57827 | G4          | 0.00  | 0.00  | 0.00  | NaN   |
| 57828 | DKFZP434A10 | 0.00  | 0.13  | 0.00  | 0.03  |
| 57830 | LOC57830    | 0.00  | 0.50  | 0.00  | -0.19 |
| 57834 | CYP4F11     | 0.00  | 0.00  | 0.00  | NaN   |
| 57862 | LOC57862    | 0.00  | 0.00  | 0.00  | NaN   |
| 57863 | LOC57863    | 0.00  | 0.00  | 0.00  | NaN   |
| 58155 | PTBP2       | 0.09  | 0.00  | 0.05  | 0.66  |
| 58158 | NEUROD4     | 0.00  | 0.00  | 0.00  | NaN   |
| 58189 | WFDC1       | -0.09 | -0.13 | 0.00  | -0.19 |
| 58190 | NLI-IF      | 0.00  | 0.00  | 0.00  | NaN   |
| 58472 | SQRDL       | 0.00  | 0.00  | 0.00  | NaN   |
| 58473 | PHRET1      | 0.09  | 0.13  | 0.00  | 0.53  |
| 58477 | APMCF1      | 0.09  | 0.00  | 0.00  | -0.11 |
| 58478 | MASA        | 0.00  | 0.00  | 0.00  | NaN   |
| 58483 | EST-YD1     | 0.00  | 0.00  | 0.00  | NaN   |
| 58486 | LOC58486    | 0.00  | 0.00  | 0.00  | NaN   |
| 58487 | ZF          | 0.00  | 0.00  | 0.00  | NaN   |
| 58488 | PCTP        | 0.00  | 0.00  | 0.00  | 0.44  |
| 58494 | JAM2        | 0.00  | 0.00  | 0.00  | NaN   |
| 58495 | ZNF339      | 0.00  | 0.00  | 0.00  | NaN   |
| 58497 | HTCD37      | 0.00  | 0.00  | 0.05  | 0.47  |
| 58498 | LOC58498    | 0.00  | 0.00  | 0.00  | NaN   |
| 58500 | LOC58500    | 0.18  | 0.00  | 0.10  | 0.51  |
| 58503 | PROL1       | 0.00  | 0.00  | 0.00  | NaN   |
| 58504 | LOC58504    | 0.00  | -0.13 | 0.00  | 0.08  |

|       |          |       |       |       |       |
|-------|----------|-------|-------|-------|-------|
| 58509 | LOC58509 | 0.00  | 0.00  | 0.00  | NaN   |
| 58511 | DLAD     | 0.00  | 0.00  | 0.05  | 0.31  |
| 58513 | EPS15R   | 0.00  | 0.00  | 0.05  | 0.51  |
| 58516 | TERA     | 0.00  | 0.00  | 0.00  | NaN   |
| 58517 | S164     | 0.00  | 0.00  | 0.00  | NaN   |
| 58525 | LOC58525 | 0.00  | 0.00  | 0.00  | NaN   |
| 58528 | RAGD     | 0.00  | 0.00  | -0.05 | 0.08  |
| 58529 | MYOZ1    | 0.09  | 0.00  | 0.00  | 0.01  |
| 58530 | C6orf23  | 0.00  | 0.00  | 0.00  | NaN   |
| 58533 | SNX6     | 0.00  | 0.00  | 0.00  | NaN   |
| 58985 | IL22R    | -0.09 | 0.00  | 0.00  | 0.03  |
| 58986 | TMEM8    | 0.00  | 0.00  | -0.05 | 0.32  |
| 59269 | HIVEP3   | 0.00  | 0.00  | 0.00  | NaN   |
| 59307 | SIGIRR   | -0.27 | -0.13 | -0.15 | 0.40  |
| 59335 | PRDM12   | 0.00  | 0.00  | 0.00  | NaN   |
| 59336 | PRDM13   | 0.00  | 0.00  | 0.00  | NaN   |
| 59338 | PLEKHA1  | 0.00  | 0.00  | -0.05 | 0.18  |
| 59340 | HRH4     | 0.00  | 0.00  | -0.15 | -0.07 |
| 59341 | TRPV4    | 0.00  | 0.00  | 0.05  | -0.22 |
| 59342 | RISC     | 0.09  | -0.13 | 0.00  | 0.11  |
| 59344 | ALOXE3   | 0.00  | 0.00  | 0.00  | NaN   |
| 59347 | FKSG2    | 0.27  | -0.13 | -0.05 | 0.11  |
| 59348 | ZBRK1    | 0.00  | 0.00  | -0.05 | 0.15  |
| 59351 | UC28     | 0.00  | 0.00  | 0.00  | NaN   |
| 60312 | AFAP     | 0.00  | -0.13 | -0.10 | 0.25  |
| 60313 | SP192    | 0.00  | 0.00  | 0.00  | NaN   |
| 60314 | C12orf10 | 0.00  | 0.00  | 0.00  | NaN   |
| 60370 | PP5395   | 0.00  | 0.00  | -0.05 | 0.06  |
| 60385 | TSKS     | 0.00  | 0.00  | 0.00  | NaN   |
| 60436 | TGIF2    | 0.00  | -0.13 | 0.00  | 0.09  |
| 60467 | BPESC1   | 0.00  | 0.00  | 0.00  | NaN   |
| 60468 | BACH2    | 0.00  | 0.00  | 0.00  | NaN   |
| 60481 | HELO1    | 0.00  | 0.00  | 0.00  | NaN   |
| 60482 | SLC5A7   | 0.00  | 0.00  | 0.00  | NaN   |
| 60484 | BRAL1    | 0.00  | 0.13  | 0.00  | -0.29 |
| 60485 | WW45     | 0.00  | 0.00  | 0.00  | NaN   |
| 60487 | MDS024   | 0.00  | 0.00  | 0.00  | NaN   |
| 60489 | MDS019   | -0.09 | 0.00  | 0.05  | 0.42  |
| 60490 | MDS018   | 0.00  | 0.00  | 0.00  | NaN   |
| 60491 | NIF3L1   | 0.00  | 0.00  | 0.00  | NaN   |
| 60492 | MDS025   | 0.00  | 0.00  | 0.05  | 0.23  |
| 60493 | FLJ13149 | 0.00  | 0.00  | 0.00  | NaN   |
| 60494 | FLJ23514 | 0.00  | 0.00  | 0.00  | NaN   |
| 60495 | HPA2     | 0.00  | 0.00  | -0.05 | 0.06  |
| 60496 | AASDHPPT | 0.00  | 0.00  | 0.00  | NaN   |
| 60509 | FLJ21839 | 0.09  | 0.00  | 0.05  | 0.33  |
| 60526 | FLJ21820 | 0.09  | 0.00  | -0.05 | 0.35  |

|       |          |       |       |       |       |
|-------|----------|-------|-------|-------|-------|
| 60528 | ELAC2    | 0.00  | 0.00  | 0.00  | NaN   |
| 60529 | ALX4     | 0.00  | 0.00  | 0.00  | NaN   |
| 60558 | FLJ13220 | 0.00  | 0.00  | 0.00  | NaN   |
| 60559 | FLJ22649 | 0.00  | 0.13  | -0.10 | 0.39  |
| 60560 | FLJ21613 | 0.00  | 0.00  | 0.00  | NaN   |
| 60561 | FLJ11785 | 0.09  | 0.00  | 0.00  | 0.33  |
| 60598 | KCNK15   | 0.09  | 0.13  | 0.00  | -0.10 |
| 60625 | DDX35    | 0.00  | -0.13 | 0.00  | 0.27  |
| 60626 | RIC-8    | -0.27 | -0.13 | -0.15 | 0.79  |
| 60672 | FLJ12438 | 0.00  | 0.00  | 0.00  | NaN   |
| 60673 | FLJ11773 | 0.00  | 0.00  | 0.00  | NaN   |
| 60676 | PLAC3    | 0.00  | 0.00  | 0.00  | NaN   |
| 60681 | FKBP10   | 0.00  | 0.13  | 0.00  | 0.12  |
| 60684 | FLJ12716 | 0.00  | 0.00  | -0.05 | 0.44  |
| 60685 | TEX27    | 0.00  | 0.00  | 0.00  | NaN   |
| 60686 | FLJ12154 | 0.00  | 0.00  | 0.00  | NaN   |
| 63826 | SRR      | 0.00  | -0.13 | 0.00  | 0.10  |
| 63827 | BCAN     | 0.00  | 0.13  | 0.00  | 0.02  |
| 63874 | FLJ12816 | 0.00  | 0.00  | 0.00  | NaN   |
| 63875 | MRPL17   | 0.00  | 0.00  | 0.00  | 0.49  |
| 63876 | PKNOX2   | -0.09 | 0.00  | -0.10 | 0.10  |
| 63877 | FLJ13188 | 0.00  | 0.00  | -0.05 | 0.03  |
| 63891 | FLJ12565 | -0.09 | 0.00  | -0.05 | 0.36  |
| 63892 | FLJ21877 | 0.00  | 0.00  | -0.05 | 0.35  |
| 63893 | E2-230K  | 0.00  | 0.13  | 0.00  | 0.35  |
| 63894 | FLJ12707 | 0.00  | 0.00  | 0.00  | NaN   |
| 63895 | FLJ23403 | 0.00  | 0.00  | 0.00  | NaN   |
| 63897 | FLJ22087 | 0.18  | 0.13  | 0.00  | 0.76  |
| 63898 | FLJ20967 | -0.09 | -0.13 | -0.05 | 0.03  |
| 63899 | FLJ22609 | -0.09 | 0.00  | 0.00  | 0.24  |
| 63901 | FLJ22794 | 0.00  | 0.00  | 0.00  | NaN   |
| 63906 | FLJ12455 | -0.09 | -0.13 | 0.00  | -0.03 |
| 63910 | C20orf59 | 0.09  | 0.13  | 0.00  | -0.11 |
| 63916 | ELMO2    | 0.00  | 0.00  | 0.00  | NaN   |
| 63917 | FLJ21634 | 0.00  | 0.00  | -0.05 | 0.27  |
| 63920 | LOC63920 | 0.00  | 0.00  | 0.00  | NaN   |
| 63923 | LOC63923 | 0.00  | 0.00  | 0.05  | -0.25 |
| 63924 | FLJ20871 | 0.00  | 0.00  | 0.00  | NaN   |
| 63925 | ZNF335   | 0.00  | 0.00  | 0.00  | NaN   |
| 63926 | ANKRD5   | 0.00  | 0.00  | 0.00  | NaN   |
| 63928 | LOC63928 | 0.00  | 0.00  | 0.00  | NaN   |
| 63929 | LOC63929 | 0.00  | 0.00  | 0.05  | -0.07 |
| 63931 | MRPS14   | 0.00  | 0.00  | 0.05  | 0.35  |
| 63933 | FLJ20958 | 0.00  | 0.00  | 0.10  | 0.48  |
| 63934 | FLJ14011 | 0.00  | 0.13  | 0.05  | 0.16  |
| 63935 | C20orf67 | 0.00  | 0.00  | 0.00  | NaN   |
| 63940 | C6orf9   | 0.00  | 0.00  | 0.00  | NaN   |

|       |          |       |       |       |       |
|-------|----------|-------|-------|-------|-------|
| 63941 | APBA2BP  | -0.09 | -0.13 | 0.00  | 0.38  |
| 63943 | FKBPL    | 0.00  | 0.00  | 0.00  | NaN   |
| 63967 | CLASPIN  | 0.00  | 0.00  | 0.00  | NaN   |
| 63970 | P53AIP1  | -0.09 | 0.00  | -0.10 | 0.07  |
| 63971 | KIF13A   | 0.00  | 0.00  | -0.05 | 0.11  |
| 63974 | NEUROD6  | 0.00  | 0.13  | 0.00  | 0.10  |
| 63976 | PRDM16   | 0.00  | 0.00  | 0.00  | NaN   |
| 63978 | PRDM14   | 0.00  | 0.00  | 0.00  | NaN   |
| 63982 | C11orf25 | 0.00  | 0.00  | 0.00  | NaN   |
| 64062 | SE70-2   | -0.09 | 0.13  | -0.10 | 0.26  |
| 64063 | PRSS22   | 0.00  | 0.00  | 0.00  | NaN   |
| 64064 | OXCT2    | 0.00  | 0.00  | 0.00  | NaN   |
| 64065 | PIGPC1   | 0.00  | 0.00  | 0.00  | NaN   |
| 64066 | MMP27    | 0.00  | 0.13  | 0.00  | 0.26  |
| 64067 | NPAS3    | 0.00  | 0.00  | 0.00  | NaN   |
| 64077 | LHPP     | 0.00  | 0.00  | -0.05 | 0.10  |
| 64078 | SLC28A3  | 0.00  | 0.00  | 0.00  | NaN   |
| 64080 | RBSK     | 0.09  | 0.00  | 0.05  | 0.33  |
| 64081 | MAWBP    | 0.00  | 0.00  | 0.00  | NaN   |
| 64083 | GOLPH3   | 0.00  | 0.00  | 0.15  | 0.26  |
| 64084 | CLSTN2   | 0.00  | 0.00  | 0.00  | NaN   |
| 64087 | MCCC2    | 0.00  | 0.00  | 0.00  | NaN   |
| 64089 | SNX16    | 0.00  | 0.00  | 0.05  | -0.15 |
| 64091 | POP2     | 0.00  | 0.00  | 0.00  | NaN   |
| 64092 | SAMSN1   | 0.00  | -0.25 | -0.05 | -0.02 |
| 64096 | GFRA4    | 0.00  | 0.00  | 0.00  | NaN   |
| 64097 | EPB41L4  | 0.00  | 0.00  | 0.00  | NaN   |
| 64100 | ELSPBP1  | 0.09  | 0.00  | 0.00  | 0.11  |
| 64106 | OT7T022  | 0.00  | 0.00  | 0.00  | NaN   |
| 64108 | IFRG28   | 0.00  | 0.00  | 0.10  | 0.46  |
| 64110 | MAGEF1   | 0.09  | 0.00  | 0.00  | 0.23  |
| 64111 | RFRP     | 0.00  | 0.13  | 0.00  | -0.06 |
| 64112 | MAP-1    | 0.00  | 0.00  | 0.00  | NaN   |
| 64114 | PP1201   | 0.00  | 0.00  | 0.00  | NaN   |
| 64116 | LOC64116 | 0.00  | 0.00  | 0.00  | NaN   |
| 64118 | PP3111   | 0.00  | 0.00  | 0.00  | NaN   |
| 64121 | GTR2     | 0.00  | 0.00  | 0.00  | NaN   |
| 64122 | FN3K     | 0.00  | 0.00  | 0.00  | NaN   |
| 64123 | ETL      | 0.00  | 0.00  | 0.00  | NaN   |
| 64127 | CARD15   | -0.09 | 0.00  | -0.05 | 0.02  |
| 64129 | LIECG3   | 0.00  | 0.00  | 0.00  | NaN   |
| 64130 | LIN-7B   | 0.09  | 0.00  | 0.00  | 0.32  |
| 64132 | XYLT2    | 0.00  | 0.25  | 0.00  | 0.59  |
| 64135 | MDA5     | 0.00  | 0.00  | -0.05 | 0.13  |
| 64137 | ABCG4    | -0.09 | 0.00  | -0.05 | -0.10 |
| 64149 | NJMU-R1  | 0.00  | 0.00  | 0.00  | NaN   |
| 64151 | HCAP-G   | 0.00  | 0.00  | -0.05 | 0.22  |

|       |          |       |       |       |       |
|-------|----------|-------|-------|-------|-------|
| 64167 | LOC64167 | 0.00  | 0.00  | 0.00  | NaN   |
| 64170 | CARD9    | 0.00  | 0.00  | 0.00  | NaN   |
| 64172 | LOC64172 | 0.00  | 0.00  | 0.00  | NaN   |
| 64173 | SPATA1   | 0.00  | 0.00  | 0.05  | 0.01  |
| 64174 | LOC64174 | -0.09 | -0.13 | 0.00  | 0.06  |
| 64175 | GROS1    | 0.00  | 0.00  | 0.00  | NaN   |
| 64180 | LOC64180 | -0.09 | -0.13 | 0.00  | -0.01 |
| 64184 | HE3-BETA | 0.00  | 0.00  | 0.00  | NaN   |
| 64208 | POP3     | 0.00  | 0.00  | 0.10  | 0.19  |
| 64210 | MMS19L   | 0.00  | 0.00  | -0.05 | 0.30  |
| 64211 | LHX5     | 0.00  | 0.00  | 0.00  | NaN   |
| 64215 | DNAJL1   | -0.09 | 0.00  | 0.05  | 0.12  |
| 64216 | TFB2M    | 0.00  | 0.00  | 0.00  | NaN   |
| 64218 | FLJ12287 | 0.00  | 0.13  | 0.00  | 0.04  |
| 64220 | FLJ12541 | 0.00  | 0.00  | 0.00  | NaN   |
| 64221 | FLJ21044 | 0.00  | 0.00  | -0.10 | -0.32 |
| 64222 | ADIR     | 0.00  | 0.00  | 0.00  | NaN   |
| 64223 | GBL      | 0.00  | 0.00  | 0.00  | NaN   |
| 64231 | MS4A6A   | 0.00  | 0.00  | 0.00  | NaN   |
| 64232 | MS4A5    | 0.00  | 0.00  | 0.00  | NaN   |
| 64240 | ABCG5    | 0.00  | 0.00  | 0.00  | NaN   |
| 64283 | FLJ21817 | 0.00  | 0.00  | 0.00  | NaN   |
| 64284 | RAB17    | 0.00  | 0.00  | -0.05 | 0.17  |
| 64285 | FLJ22357 | 0.00  | 0.00  | -0.05 | 0.25  |
| 64318 | AD24     | 0.00  | 0.00  | 0.00  | NaN   |
| 64319 | FLJ11618 | 0.00  | 0.00  | 0.00  | NaN   |
| 64320 | RNF25    | 0.00  | 0.00  | 0.00  | NaN   |
| 64321 | SOX17    | 0.00  | 0.00  | 0.00  | NaN   |
| 64324 | NSD1     | 0.00  | 0.13  | 0.00  | 0.44  |
| 64328 | XPO4     | 0.00  | 0.00  | -0.10 | 0.35  |
| 64342 | FLJ14249 | 0.09  | 0.00  | 0.05  | 0.24  |
| 64343 | FLJ21939 | -0.09 | 0.00  | -0.05 | -0.12 |
| 64344 | HIF-3A   | 0.09  | 0.00  | 0.00  | 0.16  |
| 64374 | SIL1     | 0.00  | 0.00  | -0.05 | 0.44  |
| 64375 | ZNFN1A4  | 0.00  | 0.00  | 0.00  | NaN   |
| 64376 | PEGASUS  | 0.09  | 0.00  | -0.05 | 0.70  |
| 64377 | CHST8    | 0.00  | 0.00  | 0.05  | -0.15 |
| 64388 | FLJ21195 | 0.00  | 0.00  | 0.00  | NaN   |
| 64393 | WIG1     | 0.09  | 0.00  | 0.05  | 0.35  |
| 64395 | FLJ13057 | 0.00  | 0.00  | 0.00  | NaN   |
| 64397 | ZFP106   | 0.00  | 0.00  | 0.00  | NaN   |
| 64398 | MPP5     | 0.00  | 0.00  | 0.05  | 0.22  |
| 64400 | FTS      | 0.09  | 0.00  | 0.00  | 0.45  |
| 64405 | CDH22    | 0.00  | 0.00  | 0.00  | NaN   |
| 64410 | FLJ12587 | 0.00  | 0.00  | -0.05 | 0.18  |
| 64411 | ARAP3    | 0.00  | 0.00  | 0.00  | NaN   |
| 64417 | FLJ21657 | 0.00  | 0.00  | 0.05  | -0.15 |



|       |             |       |       |       |       |
|-------|-------------|-------|-------|-------|-------|
| 64418 | FLJ13576    | 0.09  | 0.00  | 0.00  | -0.07 |
| 64421 | SCIDA       | 0.00  | 0.00  | 0.00  | NaN   |
| 64422 | APG3        | 0.00  | 0.00  | 0.00  | NaN   |
| 64423 | FLJ22056    | 0.00  | 0.00  | 0.00  | NaN   |
| 64425 | FLJ13390    | -0.09 | 0.00  | 0.05  | 0.33  |
| 64427 | FLJ12788    | 0.00  | 0.00  | 0.00  | NaN   |
| 64428 | FLJ21988    | 0.00  | 0.00  | -0.05 | 0.27  |
| 64429 | FLJ21952    | 0.00  | 0.00  | -0.05 | 0.30  |
| 64430 | FLJ12799    | 0.00  | 0.00  | 0.00  | NaN   |
| 64431 | FLJ13433    | 0.00  | 0.00  | 0.00  | NaN   |
| 64446 | DNAI2       | 0.00  | 0.13  | 0.00  | 0.14  |
| 64499 | TPSB2       | 0.00  | 0.00  | -0.05 | 0.09  |
| 64506 | CPEB1       | 0.00  | 0.00  | 0.00  | NaN   |
| 64577 | ALDH8A1     | 0.00  | 0.00  | 0.05  | -0.10 |
| 64579 | NDST4       | 0.00  | 0.00  | 0.00  | NaN   |
| 64581 | CLECSF12    | -0.09 | 0.00  | 0.00  | 0.06  |
| 64582 | HUMNP1IY20  | 0.00  | 0.00  | 0.00  | NaN   |
| 64598 | AF053356_CD | 0.18  | 0.00  | 0.00  | 0.00  |
| 64600 | PLA2G2F     | -0.09 | 0.00  | 0.00  | 0.03  |
| 64641 | FLJ11500    | -0.09 | -0.25 | -0.05 | 0.00  |
| 64682 | MCPR        | 0.00  | 0.00  | 0.00  | NaN   |
| 64693 | CTAGE-1     | 0.00  | 0.00  | -0.05 | 0.11  |
| 64708 | COPS7B      | 0.00  | 0.00  | 0.00  | NaN   |
| 64710 | NUCKS       | 0.00  | 0.13  | 0.00  | 0.14  |
| 64714 | PDIP        | 0.00  | 0.00  | -0.05 | 0.02  |
| 64745 | FLJ20859    | 0.00  | 0.13  | 0.05  | 0.02  |
| 64746 | GOLPH1      | 0.09  | 0.00  | 0.00  | 0.37  |
| 64747 | FLJ14153    | 0.00  | 0.00  | 0.05  | -0.03 |
| 64748 | FLJ13055    | 0.00  | 0.00  | 0.00  | NaN   |
| 64750 | SMURF2      | 0.27  | 0.13  | 0.00  | 0.21  |
| 64754 | FLJ21080    | 0.09  | 0.00  | 0.00  | 0.01  |
| 64755 | FLJ13868    | 0.00  | 0.00  | 0.00  | NaN   |
| 64757 | FLJ22390    | 0.09  | 0.00  | 0.00  | 0.12  |
| 64759 | TEM6        | 0.00  | 0.00  | 0.00  | NaN   |
| 64760 | RAI16       | -0.09 | -0.25 | -0.10 | 0.32  |
| 64761 | FLJ22693    | 0.00  | 0.00  | 0.00  | NaN   |
| 64762 | FLJ21610    | 0.00  | 0.00  | -0.15 | 0.10  |
| 64763 | FLJ22059    | 0.00  | 0.00  | -0.05 | 0.32  |
| 64764 | DKFZP586F24 | 0.00  | 0.00  | 0.00  | NaN   |
| 64766 | FLJ12903    | 0.00  | 0.00  | 0.00  | NaN   |
| 64768 | C9orf12     | 0.00  | 0.00  | 0.00  | NaN   |
| 64769 | FLJ11730    | 0.00  | 0.00  | 0.00  | NaN   |
| 64771 | FLJ22195    | 0.00  | 0.00  | 0.00  | NaN   |
| 64772 | FLJ21865    | 0.00  | 0.25  | 0.00  | 0.54  |
| 64776 | FLJ23499    | 0.00  | 0.00  | 0.00  | NaN   |
| 64777 | FLJ22318    | 0.18  | 0.00  | 0.00  | 0.53  |
| 64778 | FLJ23399    | 0.09  | 0.00  | 0.00  | 0.11  |

|       |             |       |       |       |       |
|-------|-------------|-------|-------|-------|-------|
| 64779 | FLJ12998    | -0.09 | -0.13 | -0.05 | 0.49  |
| 64780 | MICAL       | 0.00  | 0.00  | 0.05  | 0.04  |
| 64781 | LK4         | 0.00  | -0.25 | 0.00  | 0.41  |
| 64782 | FLJ12484    | 0.00  | 0.00  | -0.05 | 0.30  |
| 64783 | RBM15       | 0.09  | 0.00  | 0.00  | 0.00  |
| 64784 | FLJ21868    | 0.00  | 0.00  | 0.00  | NaN   |
| 64785 | FLJ13912    | -0.09 | 0.00  | 0.00  | 0.16  |
| 64786 | FLJ12085    | 0.09  | 0.00  | 0.00  | 0.31  |
| 64787 | EPS8R2      | -0.18 | -0.13 | 0.00  | 0.08  |
| 64788 | FLJ12681    | 0.00  | 0.00  | -0.05 | 0.12  |
| 64789 | FLJ21144    | 0.00  | 0.00  | 0.00  | NaN   |
| 64792 | FLJ14117    | 0.18  | 0.00  | 0.00  | 0.47  |
| 64793 | DKFZP434L01 | -0.09 | 0.00  | 0.00  | -0.10 |
| 64794 | DDX31       | 0.00  | 0.00  | 0.00  | NaN   |
| 64795 | FLJ13910    | 0.00  | 0.00  | 0.00  | 0.36  |
| 64798 | FLJ12428    | 0.00  | 0.25  | 0.15  | -0.13 |
| 64799 | FLJ12476    | 0.00  | 0.00  | 0.00  | NaN   |
| 64800 | FLJ23588    | 0.00  | 0.00  | 0.05  | 0.01  |
| 64816 | CYP3A43     | 0.18  | 0.00  | 0.00  | 0.43  |
| 64834 | ELOVL1      | 0.00  | 0.00  | 0.00  | NaN   |
| 64837 | FLJ12387    | -0.09 | 0.00  | 0.05  | 0.09  |
| 64838 | FLJ22362    | 0.09  | 0.13  | 0.05  | -0.15 |
| 64847 | FLJ21347    | 0.00  | 0.25  | 0.00  | 0.52  |
| 64848 | FLJ21940    | 0.00  | 0.13  | 0.00  | 0.33  |
| 64849 | SLC13A3     | 0.00  | 0.00  | 0.00  | NaN   |
| 64850 | AGXT2L1     | 0.00  | 0.00  | 0.00  | NaN   |
| 64852 | FLJ22347    | 0.00  | 0.00  | 0.00  | NaN   |
| 64854 | FLJ12552    | 0.00  | 0.00  | 0.00  | NaN   |
| 64856 | FLJ22215    | 0.00  | 0.13  | 0.00  | 0.01  |
| 64858 | DCGRE1B     | 0.27  | 0.13  | 0.05  | 0.82  |
| 64859 | FLJ22833    | 0.00  | 0.00  | 0.00  | NaN   |
| 64863 | FLJ23017    | 0.00  | 0.00  | 0.00  | NaN   |
| 64864 | FLJ12994    | 0.00  | 0.00  | 0.05  | -0.07 |
| 64866 | FLJ22969    | -0.09 | 0.00  | -0.05 | 0.23  |
| 64895 | PAPOLG      | 0.00  | 0.00  | 0.00  | NaN   |
| 64897 | FLJ12448    | 0.00  | 0.00  | 0.00  | 0.09  |
| 64901 | RANBP17     | 0.00  | 0.00  | 0.05  | -0.01 |
| 64919 | BCL11B      | 0.00  | 0.00  | 0.00  | NaN   |
| 64921 | FLJ21213    | 0.18  | 0.00  | 0.00  | 0.37  |
| 64922 | FLJ21302    | 0.00  | -0.13 | -0.05 | 0.07  |
| 64924 | ZTL1        | 0.00  | 0.00  | 0.00  | NaN   |
| 64925 | FLJ12800    | -0.09 | 0.00  | -0.05 | -0.01 |
| 64927 | FLJ12572    | 0.00  | 0.00  | 0.00  | NaN   |
| 64940 | FLJ13195    | 0.00  | 0.00  | 0.05  | 0.32  |
| 64943 | FLJ12442    | -0.09 | -0.25 | -0.10 | 0.14  |
| 64960 | MRPS15      | 0.00  | 0.00  | 0.00  | NaN   |
| 64963 | MRPS11      | 0.00  | 0.00  | -0.05 | 0.39  |

|       |           |       |       |       |       |
|-------|-----------|-------|-------|-------|-------|
| 64981 | MRPL34    | -0.09 | 0.00  | 0.00  | 0.24  |
| 65003 | MRPL11    | 0.00  | 0.00  | 0.05  | 0.40  |
| 65005 | MRPL9     | 0.00  | 0.13  | 0.05  | 0.41  |
| 65009 | NDRG4     | -0.09 | 0.00  | 0.00  | 0.05  |
| 65010 | SLC26A6   | -0.09 | 0.00  | 0.00  | 0.04  |
| 65012 | SLC26A10  | 0.00  | 0.00  | 0.00  | NaN   |
| 65018 | PINK1     | -0.09 | 0.00  | 0.00  | 0.19  |
| 65055 | FLJ13110  | 0.00  | 0.00  | -0.05 | 0.18  |
| 65057 |           | -0.09 | -0.13 | 0.00  | 0.40  |
| 65080 | MRPL44    | 0.00  | 0.00  | 0.00  | NaN   |
| 65082 | VPS33A    | 0.00  | -0.13 | 0.00  | -0.25 |
| 65083 | Nrap      | -0.09 | 0.00  | 0.10  | 0.49  |
| 65094 | FLJ12517  | 0.09  | 0.00  | 0.00  | 0.09  |
| 65095 | FLJ12949  | 0.00  | 0.13  | 0.05  | 0.39  |
| 65108 | MACMARCKS | 0.00  | 0.00  | 0.00  | NaN   |
| 65110 | UPF3A     | -0.09 | -0.13 | -0.05 | 0.38  |
| 65117 | FLJ11021  | 0.00  | -0.13 | 0.00  | 0.36  |
| 65121 | LOC65121  | 0.00  | 0.00  | 0.00  | NaN   |
| 65123 | FLJ21919  | 0.09  | 0.13  | 0.00  | 0.34  |
| 65124 | FLJ21870  | 0.00  | 0.00  | 0.00  | NaN   |
| 65125 | PRKWNK1   | 0.00  | 0.00  | 1.00  | 0.60  |
| 65220 | FLJ13052  | 0.00  | 0.00  | 0.20  | 0.02  |
| 65243 | LOC65243  | 0.00  | 0.00  | 0.00  | NaN   |
| 65244 | FLJ13117  | 0.00  | 0.00  | 0.00  | NaN   |
| 65250 | FLJ13231  | 0.00  | 0.00  | 0.05  | 0.18  |
| 65258 | MPPE1     | 0.00  | 0.00  | 0.00  | NaN   |
| 65260 | FLJ12439  | 0.00  | 0.00  | 0.00  | NaN   |
| 65263 | FLJ13852  | 0.18  | 0.00  | 0.10  | 0.50  |
| 65264 | FLJ13855  | 0.00  | 0.38  | 0.00  | 0.71  |
| 65265 | FLJ20989  | 0.18  | 0.00  | 0.15  | 0.41  |
| 65979 | FLJ13171  | 0.00  | 0.00  | 0.00  | NaN   |
| 65980 | FLJ13441  | 0.00  | 0.13  | 0.10  | 0.53  |
| 65981 | FLJ22569  | 0.00  | 0.00  | 0.00  | NaN   |
| 65982 | FLJ12895  | 0.00  | 0.13  | 0.00  | -0.09 |
| 65983 | FLJ21313  | 0.00  | 0.00  | 0.00  | NaN   |
| 65985 | FLJ12389  | -0.09 | 0.00  | 0.00  | 0.47  |
| 65986 | RINZF     | 0.00  | 0.25  | 0.05  | 0.48  |
| 65987 | MGC2376   | 0.27  | 0.00  | 0.00  | -0.01 |
| 65988 | MGC2474   | 0.00  | 0.00  | 0.00  | NaN   |
| 65989 | MGC2487   | 0.00  | 0.00  | 0.00  | NaN   |
| 65990 | MGC2494   | 0.00  | 0.00  | -0.05 | 0.36  |
| 65992 | C20orf116 | 0.00  | 0.00  | 0.00  | NaN   |
| 65993 | MRPS34    | 0.00  | 0.00  | 0.00  | NaN   |
| 65997 | MGC2827   | 0.00  | 0.00  | 0.00  | NaN   |
| 65999 | MGC3036   | 0.00  | 0.00  | -0.05 | 0.12  |
| 66002 | CYP4F12   | 0.00  | 0.00  | 0.05  | -0.08 |
| 66008 | ALS2CR3   | 0.00  | 0.00  | 0.00  | NaN   |

|       |             |       |       |       |       |
|-------|-------------|-------|-------|-------|-------|
| 66035 | SLC2A11     | 0.00  | 0.00  | 0.05  | -0.11 |
| 66036 | MTMR8       | -0.09 | -0.50 | -0.15 | 0.37  |
| 78986 | MGC1136     | 0.09  | -0.25 | -0.05 | -0.03 |
| 78988 | MRP63       | 0.00  | 0.00  | -0.10 | 0.44  |
| 78989 | MGC3279     | 0.00  | 0.00  | 0.00  | NaN   |
| 78990 | FLJ21916    | 0.00  | 0.00  | 0.00  | NaN   |
| 78991 | MGC3265     | 0.00  | 0.00  | 0.00  | NaN   |
| 78992 | MGC3262     | 0.00  | 0.00  | -0.05 | 0.22  |
| 78994 | MGC3121     | 0.00  | 0.00  | 0.00  | NaN   |
| 78995 | MGC3130     | 0.00  | -0.13 | 0.00  | -0.31 |
| 78996 | MGC5242     | 0.00  | 0.00  | 0.00  | NaN   |
| 78997 | MGC3129     | 0.09  | 0.13  | 0.00  | 0.03  |
| 78998 | MGC3113     | 0.18  | 0.00  | 0.05  | 0.27  |
| 78999 | MGC3103     | 0.09  | 0.00  | 0.05  | -0.02 |
| 79000 | MGC2603     | -0.09 | 0.00  | 0.00  | 0.26  |
| 79001 | IMAGE345520 | 0.00  | 0.00  | 0.00  | NaN   |
| 79003 | MGC2488     | 0.00  | -0.13 | 0.00  | 0.41  |
| 79004 | MGC2491     | 0.00  | -0.13 | -0.05 | 0.42  |
| 79005 | MGC3180     | 0.00  | 0.00  | 0.05  | 0.58  |
| 79006 | MGC2601     | 0.00  | 0.00  | -0.05 | 0.11  |
| 79007 | MGC3101     | -0.09 | -0.13 | -0.05 | 0.18  |
| 79008 | MGC5178     | 0.00  | 0.00  | 0.00  | NaN   |
| 79009 | GU2         | 0.00  | 0.00  | 0.00  | NaN   |
| 79012 | MGC8407     | -0.09 | 0.00  | -0.05 | 0.07  |
| 79016 | MGC2594     | -0.09 | 0.00  | 0.00  | 0.19  |
| 79018 | MGC3048     | 0.00  | 0.00  | 0.00  | NaN   |
| 79019 | MGC861      | 0.00  | 0.00  | 0.05  | 0.45  |
| 79020 | MGC2821     | 0.00  | 0.00  | -0.05 | 0.03  |
| 79022 | MGC5576     | 0.00  | 0.00  | 0.00  | NaN   |
| 79023 | MGC5585     | 0.00  | 0.00  | 0.00  | NaN   |
| 79025 | MGC5356     | 0.09  | 0.00  | 0.00  | 0.35  |
| 79026 | MGC5395     | 0.00  | 0.00  | 0.00  | NaN   |
| 79029 | MGC5347     | 0.00  | 0.00  | 0.00  | NaN   |
| 79031 | MGC3062     | 0.00  | 0.00  | 0.00  | NaN   |
| 79033 | PRNPIP      | 0.00  | 0.00  | 0.00  | NaN   |
| 79034 | MGC2718     | 0.00  | 0.00  | 0.10  | 0.07  |
| 79035 | MGC2731     | 0.00  | 0.00  | 0.00  | NaN   |
| 79036 | MGC2749     | 0.00  | 0.00  | 0.00  | NaN   |
| 79037 | MGC2463     | 0.18  | 0.00  | 0.00  | 0.32  |
| 79038 | MGC2550     | 0.00  | 0.00  | 0.00  | NaN   |
| 79039 | MGC2835     | 0.00  | 0.00  | 0.00  | NaN   |
| 79042 | LENG5       | 0.09  | 0.00  | 0.00  | 0.14  |
| 79047 | MGC2628     | 0.00  | 0.00  | 0.05  | -0.04 |
| 79048 | SBP2        | 0.00  | 0.00  | 0.00  | NaN   |
| 79050 | MGC3162     | 0.00  | 0.00  | 0.00  | NaN   |
| 79053 | MGC2840     | 0.27  | 0.00  | 0.00  | 0.68  |
| 79054 | TRPM8       | 0.00  | 0.00  | 0.00  | NaN   |

|       |           |       |       |       |       |
|-------|-----------|-------|-------|-------|-------|
| 79056 | TMG4      | 0.09  | 0.00  | 0.00  | 0.20  |
| 79058 | ASPCR1    | 0.00  | 0.00  | 0.00  | NaN   |
| 79064 | MGC3196   | 0.00  | 0.00  | 0.00  | NaN   |
| 79065 | FLJ22169  | 0.00  | 0.00  | 0.00  | NaN   |
| 79066 | MGC3329   | 0.00  | 0.00  | 0.00  | NaN   |
| 79068 | MGC5149   | 0.09  | 0.00  | 0.00  | 0.54  |
| 79070 | MGC5302   | -0.09 | -0.13 | 0.05  | 0.43  |
| 79071 | LCE       | 0.00  | 0.00  | 0.00  | NaN   |
| 79072 | MGC5297   | 0.00  | 0.00  | 0.05  | 0.30  |
| 79073 | MGC5508   | 0.00  | 0.00  | 0.00  | NaN   |
| 79074 | MGC5509   | 0.00  | 0.00  | 0.00  | NaN   |
| 79075 | MGC5528   | 0.00  | 0.25  | 0.15  | 0.57  |
| 79077 | MGC5627   | 0.00  | 0.00  | 0.00  | NaN   |
| 79078 | MGC955    | 0.00  | 0.00  | 0.00  | NaN   |
| 79080 | MGC2574   | 0.00  | 0.00  | 0.00  | NaN   |
| 79081 | MGC2477   | 0.00  | 0.00  | 0.00  | NaN   |
| 79083 | MLPH      | 0.00  | 0.00  | -0.05 | 0.24  |
| 79084 | MEP50     | 0.09  | 0.00  | 0.00  | 0.43  |
| 79085 | MGC2615   | 0.00  | 0.00  | 0.00  | NaN   |
| 79086 | MGC2747   | 0.00  | 0.00  | 0.00  | NaN   |
| 79087 | MGC3136   | 0.00  | -0.25 | 0.00  | 0.37  |
| 79088 | MGC2663   | 0.00  | 0.00  | 0.00  | NaN   |
| 79089 | MGC3123   | 0.00  | -0.13 | 0.00  | 0.07  |
| 79090 | MGC2650   | 0.09  | 0.00  | 0.05  | 0.28  |
| 79091 | MGC2654   | 0.00  | 0.00  | 0.00  | NaN   |
| 79092 | CARD14    | 0.00  | 0.25  | 0.00  | 0.22  |
| 79094 | MGC4504   | 0.00  | 0.00  | 0.00  | NaN   |
| 79095 | C9orf16   | -0.09 | 0.00  | 0.00  | 0.34  |
| 79096 | MGC4707   | 0.00  | 0.00  | 0.00  | NaN   |
| 79097 | MGC4827   | 0.00  | 0.00  | 0.00  | NaN   |
| 79098 | MGC4309   | 0.00  | 0.13  | 0.00  | -0.09 |
| 79101 | MGC5306   | 0.00  | 0.00  | -0.10 | 0.16  |
| 79109 | MGC2745   | 0.00  | 0.00  | 0.00  | NaN   |
| 79132 | LGP2      | 0.00  | 0.13  | 0.00  | 0.09  |
| 79133 | C20orf7   | 0.00  | 0.00  | 0.00  | NaN   |
| 79134 | FLJ20979  | 0.00  | 0.00  | 0.00  | NaN   |
| 79136 | C6orf22   | 0.00  | 0.00  | 0.00  | NaN   |
| 79137 | MGC3035   | 0.00  | 0.00  | 0.00  | NaN   |
| 79139 | MGC3067   | 0.18  | 0.25  | 0.05  | 0.59  |
| 79140 | MGC1203   | 0.00  | 0.00  | 0.00  | NaN   |
| 79143 | LENG4     | 0.09  | 0.00  | 0.00  | 0.11  |
| 79144 | C20orf149 | 0.09  | 0.00  | 0.05  | 0.04  |
| 79145 | MGC2217   | 0.00  | 0.00  | 0.00  | NaN   |
| 79147 | FKRP      | 0.09  | 0.00  | 0.00  | 0.29  |
| 79148 | MMP28     | 0.00  | 0.00  | 0.00  | 0.00  |
| 79149 | MGC4161   | 0.09  | 0.13  | 0.00  | -0.25 |
| 79152 | FAAH      | 0.00  | 0.00  | 0.05  | -0.08 |

|       |           |       |       |       |       |
|-------|-----------|-------|-------|-------|-------|
| 79153 | MGC4171   | 0.00  | 0.00  | 0.00  | NaN   |
| 79154 | MGC4172   | 0.00  | -0.13 | 0.00  | -0.03 |
| 79155 | ABIN-2    | 0.00  | -0.13 | -0.15 | 0.38  |
| 79156 | MGC4090   | 0.00  | 0.13  | 0.15  | 0.61  |
| 79157 | ET        | 0.00  | 0.13  | 0.00  | 0.16  |
| 79158 | MGC4170   | 0.00  | 0.00  | 0.00  | NaN   |
| 79159 | MGC3731   | -0.09 | 0.00  | 0.05  | 0.52  |
| 79161 | MGC4175   | 0.00  | 0.00  | 0.00  | NaN   |
| 79166 | ILT10     | 1.00  | 0.00  | 0.00  | -0.25 |
| 79169 | MGC4174   | 0.09  | 0.00  | 0.00  | 0.54  |
| 79170 | MGC11242  | 0.00  | 0.00  | 0.00  | 0.18  |
| 79171 | MGC10433  | 0.00  | 0.00  | 0.00  | NaN   |
| 79172 | MGC11266  | 0.09  | 0.00  | 0.00  | 0.00  |
| 79173 | MGC11271  | 0.00  | 0.00  | 0.00  | NaN   |
| 79174 | MGC11256  | 0.00  | -0.25 | 0.00  | 0.30  |
| 79175 | MGC10715  | 0.00  | 0.00  | 0.05  | -0.04 |
| 79176 | MGC11279  | 0.00  | -0.13 | -0.05 | 0.26  |
| 79177 | MGC2508   | 0.09  | 0.00  | -0.10 | 0.56  |
| 79178 | THTP      | 0.00  | 0.00  | 0.00  | NaN   |
| 79180 | MGC4342   | 0.00  | 0.00  | 0.00  | NaN   |
| 79183 | C20orf121 | 0.09  | 0.13  | 0.00  | 0.35  |
| 79187 | FSD1      | 0.00  | 0.00  | 0.00  | NaN   |
| 79188 | MGC3222   | 0.00  | 0.00  | 0.00  | NaN   |
| 79228 | MGC2655   | 0.00  | 0.00  | 0.00  | NaN   |
| 79230 | MGC4054   | 0.00  | 0.00  | 0.00  | NaN   |
| 79269 | MGC10765  | -0.09 | 0.00  | 0.10  | 0.30  |
| 79363 | MGC10731  | 0.09  | 0.00  | 0.00  | 0.20  |
| 79364 | MGC11349  | 0.00  | 0.00  | 0.00  | NaN   |
| 79365 | BHLHB3    | 0.00  | 0.00  | 0.00  | NaN   |
| 79368 | SPAP1     | 0.00  | 0.00  | 0.00  | NaN   |
| 79369 | B3GNT4    | 0.00  | -0.13 | 0.00  | -0.15 |
| 79370 | BCLG      | -0.09 | 0.00  | 0.10  | 0.10  |
| 79400 | NOX5      | 0.00  | 0.00  | 0.00  | NaN   |
| 79411 | MGC10771  | 0.00  | 0.00  | 0.00  | NaN   |
| 79412 | MGC10791  | 0.00  | 0.00  | 0.00  | NaN   |
| 79413 | MGC10796  | 0.00  | 0.00  | 0.00  | NaN   |
| 79414 | MGC2656   | 0.00  | 0.00  | 0.00  | NaN   |
| 79415 | MGC4368   | 0.00  | 0.00  | 0.00  | NaN   |
| 79441 | MGC4701   | 0.00  | -0.13 | -0.20 | 0.42  |
| 79442 | LRRC2     | -0.09 | 0.00  | -0.05 | -0.28 |
| 79443 | FYCO1     | -0.09 | 0.00  | -0.05 | 0.41  |
| 79444 | BIRC7     | 0.09  | 0.00  | 0.00  | -0.11 |
| 79446 | MGC4645   | 0.00  | 0.00  | 0.00  | NaN   |
| 79447 | MGC4606   | 0.00  | 0.00  | 0.00  | NaN   |
| 79469 | BCMSUNL   | 0.00  | 0.00  | 0.00  | NaN   |
| 79567 | FLJ13725  | -0.09 | 0.00  | 0.10  | 0.35  |
| 79568 | FLJ22555  | 0.00  | 0.00  | 0.00  | NaN   |

|       |          |       |       |       |       |
|-------|----------|-------|-------|-------|-------|
| 79570 | FLJ12650 | 0.00  | 0.00  | 0.00  | NaN   |
| 79571 | FLJ22035 | 0.00  | 0.25  | 0.00  | 0.63  |
| 79572 | FLJ20986 | 0.09  | 0.00  | 0.00  | 0.56  |
| 79573 | FLJ22584 | 0.09  | 0.00  | 0.00  | 0.30  |
| 79574 | EPS8R3   | 0.09  | 0.00  | 0.05  | 0.16  |
| 79575 | FLJ11743 | -0.09 | 0.00  | 0.00  | -0.15 |
| 79577 | C1orf28  | 0.09  | 0.00  | 0.00  | 0.31  |
| 79581 | FLJ11856 | 0.18  | 0.00  | 0.15  | 0.23  |
| 79582 | FLJ22724 | 0.00  | 0.00  | 0.00  | NaN   |
| 79585 | FLJ22021 | 0.00  | 0.00  | 0.00  | NaN   |
| 79586 | FLJ22678 | 0.00  | 0.00  | 0.00  | NaN   |
| 79587 | FLJ12118 | -0.09 | -0.13 | 0.00  | 0.35  |
| 79590 | MRPL24   | 0.00  | 0.13  | 0.00  | -0.03 |
| 79591 | FLJ13114 | 0.00  | -0.13 | -0.05 | 0.24  |
| 79594 | FLJ12875 | -0.09 | 0.00  | 0.00  | 0.20  |
| 79596 | FLJ13449 | -0.09 | 0.13  | -0.10 | 0.50  |
| 79598 | FLJ23047 | 0.00  | 0.00  | 0.00  | NaN   |
| 79600 | FLJ21127 | 0.00  | 0.00  | 0.00  | NaN   |
| 79602 | FLJ21432 | 0.00  | 0.00  | 0.05  | 0.39  |
| 79603 | FLJ12089 | 0.00  | 0.00  | 0.00  | NaN   |
| 79605 | FLJ11413 | 0.09  | 0.00  | 0.00  | -0.02 |
| 79608 | FLJ11608 | 0.00  | 0.00  | -0.05 | 0.13  |
| 79609 | FLJ13920 | 0.00  | 0.00  | 0.00  | NaN   |
| 79611 | FLJ21963 | 0.00  | 0.13  | 0.00  | -0.05 |
| 79612 | FLJ22054 | 0.00  | 0.00  | -0.05 | 0.36  |
| 79614 | FLJ14054 | 0.00  | 0.00  | 0.15  | 0.07  |
| 79616 | FLJ14166 | 0.00  | 0.00  | 0.00  | NaN   |
| 79618 | FLJ21616 | -0.09 | -0.25 | -0.05 | 0.33  |
| 79621 | FLJ11712 | 0.00  | 0.13  | 0.00  | 0.54  |
| 79622 | FLJ22940 | 0.00  | 0.00  | -0.05 | 0.39  |
| 79623 | FLJ12691 | 0.00  | 0.00  | 0.00  | NaN   |
| 79624 | FLJ12910 | 0.00  | 0.00  | 0.00  | NaN   |
| 79625 | FLJ23191 | 0.00  | 0.00  | 0.00  | NaN   |
| 79627 | FLJ21079 | 0.00  | 0.00  | 0.05  | 0.05  |
| 79628 | KIAA1985 | 0.00  | 0.00  | 0.00  | NaN   |
| 79629 | FLJ22709 | -0.09 | 0.00  | 0.00  | 0.12  |
| 79630 | FLJ23221 | 0.00  | 0.13  | 0.05  | 0.25  |
| 79631 | FLJ13119 | 0.00  | 0.00  | 0.00  | NaN   |
| 79632 | FLJ13942 | -0.09 | 0.00  | 0.05  | -0.13 |
| 79633 | FLJ23056 | 0.00  | 0.00  | 0.00  | NaN   |
| 79634 | FLJ23142 | 0.00  | 0.00  | 0.00  | NaN   |
| 79635 | FLJ13646 | 0.09  | 0.00  | 0.05  | 0.49  |
| 79637 | FLJ22160 | 0.00  | 0.13  | 0.00  | 0.17  |
| 79639 | FLJ22353 | 0.00  | 0.00  | 0.00  | NaN   |
| 79640 | FLJ23584 | 0.00  | 0.00  | 0.05  | 0.05  |
| 79641 | FLJ22386 | 0.00  | 0.00  | -0.05 | 0.42  |
| 79642 | FLJ23548 | 0.00  | 0.00  | 0.00  | NaN   |

|       |          |       |       |       |       |
|-------|----------|-------|-------|-------|-------|
| 79643 | FLJ11749 | 0.00  | 0.00  | -0.05 | 0.37  |
| 79644 | FLJ13352 | 0.00  | 0.00  | 0.00  | NaN   |
| 79645 | FLJ11767 | 0.00  | 0.13  | 0.00  | 0.24  |
| 79646 | FLJ12899 | 0.00  | 0.00  | 0.00  | NaN   |
| 79647 | FLJ12666 | 0.00  | 0.00  | 0.05  | -0.05 |
| 79648 | FLJ12847 | -0.09 | -0.25 | -0.05 | 0.38  |
| 79650 | FLJ13154 | -0.09 | 0.00  | 0.00  | 0.20  |
| 79651 | FLJ22341 | 0.00  | 0.13  | 0.00  | 0.12  |
| 79652 | FLJ20898 | 0.00  | 0.00  | 0.00  | NaN   |
| 79654 | FLJ21156 | 0.00  | 0.00  | 0.00  | NaN   |
| 79656 | FLJ11588 | 0.00  | 0.00  | 0.00  | NaN   |
| 79657 | FLJ21908 | 0.00  | 0.00  | 0.00  | NaN   |
| 79659 | FLJ11756 | 0.00  | 0.13  | 0.00  | -0.08 |
| 79661 | NEIL1    | 0.00  | 0.00  | 0.00  | NaN   |
| 79663 | FLJ22623 | 0.00  | 0.00  | 0.00  | NaN   |
| 79664 | FLJ11896 | 0.00  | 0.00  | 0.00  | 0.44  |
| 79665 | FLJ22060 | 0.18  | 0.13  | 0.00  | 0.67  |
| 79666 | FLJ13187 | 0.00  | -0.13 | 0.00  | 0.17  |
| 79667 | FLJ13197 | 0.00  | 0.00  | 0.05  | 0.13  |
| 79668 | FLJ21308 | 0.00  | 0.00  | 0.00  | NaN   |
| 79669 | FLJ23186 | 0.00  | 0.00  | 0.00  | NaN   |
| 79670 | FLJ13409 | 0.00  | 0.00  | 0.00  | NaN   |
| 79671 | FLJ21478 | -0.09 | 0.00  | -0.05 | 0.04  |
| 79672 | FLJ12171 | 0.00  | 0.00  | 0.00  | NaN   |
| 79673 | FLJ12586 | 0.00  | 0.13  | 0.00  | 0.34  |
| 79675 | FLJ21901 | 0.00  | 0.00  | 0.00  | NaN   |
| 79676 | FLJ13491 | 0.00  | 0.00  | 0.00  | NaN   |
| 79677 | FLJ22116 | 0.09  | 0.00  | -0.10 | 0.34  |
| 79679 | FLJ22418 | 0.09  | 0.00  | 0.10  | -0.16 |
| 79680 | FLJ21125 | -0.09 | 0.00  | 0.00  | 0.00  |
| 79682 | FLJ23468 | 0.00  | 0.00  | -0.05 | 0.40  |
| 79683 | FLJ20984 | 0.00  | 0.00  | 0.00  | NaN   |
| 79684 | FLJ23342 | 0.00  | 0.00  | -0.10 | 0.25  |
| 79685 | FLJ11526 | 0.00  | 0.00  | 0.00  | NaN   |
| 79686 | FLJ21276 | 0.00  | 0.00  | 0.00  | NaN   |
| 79689 | FLJ23153 | 0.09  | 0.00  | 0.00  | -0.06 |
| 79690 | GAL3ST-4 | 0.18  | 0.00  | 0.00  | -0.03 |
| 79691 | FLJ12960 | 0.00  | 0.00  | 0.00  | NaN   |
| 79692 | FLJ23393 | 0.00  | 0.00  | 0.00  | NaN   |
| 79693 | FLJ23476 | 0.00  | 0.00  | 0.00  | NaN   |
| 79694 | FLJ12838 | -0.09 | 0.00  | 0.00  | 0.01  |
| 79695 | FLJ21212 | 0.09  | 0.00  | 0.00  | 0.13  |
| 79696 | FLJ23093 | 0.00  | 0.00  | 0.00  | NaN   |
| 79697 | FLJ21802 | 0.00  | 0.00  | 0.00  | NaN   |
| 79698 | FLJ13842 | 0.55  | 0.00  | -0.05 | 0.54  |
| 79701 | FLJ22222 | 0.00  | 0.00  | 0.00  | NaN   |
| 79703 | FLJ22531 | 0.00  | 0.00  | 0.05  | 0.02  |



|       |          |       |       |       |       |
|-------|----------|-------|-------|-------|-------|
| 79705 | FLJ23119 | 0.00  | 0.00  | 0.00  | NaN   |
| 79706 | FLJ13902 | 0.18  | 0.00  | 0.00  | 0.48  |
| 79707 | FLJ23323 | 0.00  | 0.00  | 0.00  | NaN   |
| 79709 | FLJ22329 | -0.09 | 0.00  | 0.00  | 0.15  |
| 79711 | FLJ23338 | 0.00  | 0.00  | 0.00  | NaN   |
| 79712 | FLJ11753 | 0.00  | 0.00  | 0.00  | NaN   |
| 79713 | FLJ22573 | 0.00  | 0.00  | 0.00  | NaN   |
| 79714 | FLJ12436 | -0.09 | 0.00  | -0.05 | 0.30  |
| 79716 | NPEPL1   | 0.18  | 0.63  | 0.00  | 0.56  |
| 79717 | FLJ11838 | 0.00  | 0.00  | 0.00  | NaN   |
| 79719 | FLJ11506 | 0.00  | 0.00  | 0.00  | NaN   |
| 79720 | FLJ12750 | 0.00  | -0.13 | 0.00  | 0.19  |
| 79722 | FLJ11795 | 0.00  | 0.00  | 0.00  | NaN   |
| 79723 | SUV39H2  | 0.00  | 0.00  | 0.00  | NaN   |
| 79724 | FLJ23436 | 0.00  | 0.00  | 0.00  | NaN   |
| 79725 | FLJ23320 | 0.00  | 0.00  | 0.00  | NaN   |
| 79726 | FLJ12270 | 0.00  | 0.00  | 0.05  | 0.27  |
| 79727 | FLJ12457 | -0.09 | 0.00  | 0.00  | 0.03  |
| 79728 | FLJ21816 | 0.00  | 0.00  | -0.05 | 0.20  |
| 79729 | FLJ22938 | 0.00  | 0.00  | 0.00  | NaN   |
| 79730 | FLJ14001 | 0.00  | 0.00  | 0.05  | 0.32  |
| 79731 | FLJ23441 | 0.27  | 0.00  | 0.00  | 0.53  |
| 79733 | FLJ23311 | 0.00  | 0.00  | -0.05 | 0.33  |
| 79734 | FLJ12242 | 0.00  | 0.00  | 0.00  | NaN   |
| 79735 | FLJ12168 | 0.00  | 0.00  | 0.00  | NaN   |
| 79736 | FLJ22729 | 0.00  | 0.00  | 0.00  | NaN   |
| 79738 | FLJ23560 | 0.00  | 0.00  | 0.00  | NaN   |
| 79739 | FLJ23033 | 0.00  | 0.00  | 0.05  | 0.03  |
| 79740 | FLJ23049 | 0.00  | 0.00  | 0.00  | NaN   |
| 79741 | FLJ13031 | 0.00  | -0.13 | 0.05  | -0.22 |
| 79744 | FLJ23233 | 0.00  | 0.13  | 0.00  | 0.48  |
| 79746 | FLJ20909 | 0.00  | 0.00  | 0.00  | NaN   |
| 79747 | FLJ23121 | 0.00  | -0.13 | 0.00  | 0.16  |
| 79748 | FLJ13993 | 0.00  | 0.00  | 0.00  | NaN   |
| 79750 | FLJ22419 | 0.00  | 0.00  | 0.00  | NaN   |
| 79751 | FLJ13044 | -0.18 | -0.13 | -0.05 | -0.04 |
| 79752 | FLJ14007 | 0.00  | 0.00  | 0.05  | 0.22  |
| 79753 | SNIP1    | 0.00  | 0.00  | 0.00  | NaN   |
| 79754 | ASB13    | 0.00  | 0.00  | 0.05  | 0.09  |
| 79755 | FLJ13841 | 0.00  | 0.00  | 0.00  | NaN   |
| 79758 | FLJ13639 | 0.00  | 0.00  | 0.00  | NaN   |
| 79759 | FLJ13479 | 0.00  | 0.00  | 0.00  | NaN   |
| 79760 | FLJ13956 | 0.09  | 0.00  | 0.00  | 0.13  |
| 79762 | FLJ14146 | 0.09  | 0.00  | 0.05  | 0.33  |
| 79763 | FLJ23469 | 0.09  | 0.00  | 0.05  | 0.28  |
| 79767 | ELMO3    | -0.09 | 0.00  | 0.00  | 0.29  |
| 79768 | FLJ22557 | 0.00  | 0.00  | 0.00  | NaN   |

|       |            |       |       |       |       |
|-------|------------|-------|-------|-------|-------|
| 79770 | FLJ22625   | 0.00  | -0.13 | 0.00  | 0.33  |
| 79772 | FLJ22344   | 0.00  | 0.00  | 0.00  | NaN   |
| 79774 | FLJ22474   | -0.09 | -0.13 | -0.05 | 0.01  |
| 79776 | FLJ20980   | 0.00  | 0.25  | 0.00  | -0.09 |
| 79777 | FLJ13322   | 0.00  | -0.13 | 0.00  | -0.23 |
| 79778 | FLJ23471   | 0.00  | 0.00  | 0.05  | 0.16  |
| 79781 | FLJ22527   | 0.00  | 0.00  | -0.05 | 0.03  |
| 79782 | FLJ23259   | 0.09  | 0.00  | 0.00  | -0.04 |
| 79783 | C7orf10    | 0.00  | 0.00  | 0.00  | NaN   |
| 79785 | FLJ22655   | 0.00  | 0.00  | 0.00  | NaN   |
| 79786 | C16orf44   | -0.09 | 0.00  | -0.05 | 0.41  |
| 79788 | FLJ14345   | 0.09  | 0.00  | -0.05 | 0.09  |
| 79789 | calmin     | 0.00  | 0.00  | 0.00  | NaN   |
| 79791 | FLJ22477   | -0.09 | -0.13 | -0.05 | -0.01 |
| 79792 | FLJ12150   | 0.18  | 0.00  | 0.10  | 0.05  |
| 79794 | FLJ21415   | 0.00  | -0.13 | 0.00  | 0.23  |
| 79796 | DIBD1      | 0.00  | 0.00  | 0.00  | NaN   |
| 79797 | FLJ12827   | 0.00  | 0.00  | 0.00  | NaN   |
| 79799 | FLJ21934   | 0.00  | 0.00  | 0.05  | -0.08 |
| 79800 | ALS2CR8    | 0.00  | 0.00  | 0.00  | NaN   |
| 79801 | FLJ22009   | -0.09 | 0.00  | -0.05 | 0.19  |
| 79802 | FLJ13840   | 0.09  | 0.00  | 0.00  | -0.07 |
| 79803 | FLJ22501   | 0.00  | -0.13 | -0.05 | 0.10  |
| 79804 | FLJ11539   | 0.00  | 0.00  | -0.05 | 0.21  |
| 79805 | FLJ12505   | 0.00  | 0.00  | 0.00  | NaN   |
| 79807 | FLJ13273   | 0.00  | 0.00  | 0.00  | NaN   |
| 79809 | FLJ11457   | 0.00  | 0.00  | 0.00  | NaN   |
| 79810 | FLJ12598   | 0.00  | 0.00  | 0.00  | NaN   |
| 79811 | FLJ13213   | 0.09  | 0.00  | 0.05  | 0.16  |
| 79812 | ENDOGLYX1  | 0.50  | 0.00  | 0.00  | 0.03  |
| 79813 | Eu-HMTase1 | 0.00  | 0.00  | 0.05  | 0.02  |
| 79814 | AGMAT      | 0.00  | 0.00  | 0.00  | NaN   |
| 79815 | FLJ13955   | 0.00  | 0.00  | 0.00  | NaN   |
| 79817 | FLJ13204   | 0.00  | -0.13 | -0.10 | 0.02  |
| 79818 | FLJ21603   | 0.00  | 0.13  | -0.05 | 0.30  |
| 79819 | FLJ23129   | 0.00  | 0.00  | 0.00  | NaN   |
| 79820 | FLJ14298   | 0.00  | 0.13  | 0.00  | 0.28  |
| 79822 | FLJ10312   | 0.00  | 0.00  | 0.00  | NaN   |
| 79823 | FLJ23451   | 0.00  | 0.00  | 0.00  | NaN   |
| 79825 | FLJ12057   | 0.00  | 0.00  | 0.00  | NaN   |
| 79828 | FLJ13984   | 0.00  | 0.00  | 0.00  | NaN   |
| 79829 | FLJ13848   | 0.00  | 0.00  | 0.00  | NaN   |
| 79830 | FLJ23151   | 0.00  | 0.00  | 0.00  | NaN   |
| 79831 | FLJ13798   | 0.00  | 0.00  | 0.00  | NaN   |
| 79832 | FLJ21924   | 0.00  | 0.00  | 0.00  | NaN   |
| 79833 | GEMIN6     | 0.00  | 0.13  | 0.00  | -0.13 |
| 79834 | FLJ21140   | 0.00  | 0.00  | 0.00  | NaN   |

|       |          |       |       |       |       |
|-------|----------|-------|-------|-------|-------|
| 79837 | FLJ22055 | 0.00  | 0.00  | 0.00  | NaN   |
| 79838 | FLJ13593 | 0.00  | 0.00  | 0.00  | NaN   |
| 79839 | FLJ23594 | -0.09 | 0.00  | -0.10 | 0.08  |
| 79840 | FLJ12610 | 0.00  | 0.00  | 0.00  | NaN   |
| 79841 | FLJ23598 | 0.00  | 0.00  | 0.05  | -0.13 |
| 79842 | FLJ23392 | 0.00  | 0.00  | 0.00  | NaN   |
| 79843 | FLJ22746 | 0.00  | 0.00  | 0.00  | NaN   |
| 79844 | FLJ13153 | 0.09  | 0.13  | 0.30  | 0.50  |
| 79845 | FLJ12526 | 0.09  | -0.25 | -0.05 | -0.16 |
| 79846 | FLJ21062 | 0.09  | 0.00  | 0.00  | 0.44  |
| 79847 | FLJ22529 | 0.00  | -0.13 | -0.05 | 0.15  |
| 79848 | FLJ22490 | 0.00  | 0.00  | 0.00  | NaN   |
| 79849 | FLJ22756 | -0.09 | 0.00  | -0.10 | -0.11 |
| 79850 | FLJ22282 | 0.00  | -0.13 | 0.00  | -0.07 |
| 79852 | FLJ22408 | 0.00  | 0.00  | 0.05  | -0.15 |
| 79853 | FLJ22800 | 0.00  | 0.00  | 0.00  | NaN   |
| 79854 | FLJ22639 | 0.00  | 0.00  | 0.05  | 0.33  |
| 79857 | FLJ13224 | 0.00  | 0.00  | 0.00  | NaN   |
| 79858 | NEK11    | 0.00  | 0.00  | 0.00  | NaN   |
| 79861 | FLJ21665 | 0.00  | 0.00  | 0.05  | -0.09 |
| 79862 | FLJ12606 | 0.00  | 0.13  | 0.00  | -0.01 |
| 79863 | FLJ21172 | -0.09 | 0.00  | -0.25 | 0.54  |
| 79864 | FLJ23554 | 0.00  | 0.00  | -0.05 | 0.08  |
| 79865 | FLJ13693 | 0.00  | 0.00  | 0.00  | NaN   |
| 79866 | FLJ22624 | -0.09 | 0.13  | -0.15 | 0.37  |
| 79867 | FLJ12975 | 0.00  | 0.00  | 0.00  | NaN   |
| 79869 | FLJ12529 | -0.09 | 0.00  | 0.00  | 0.21  |
| 79870 | BAALC    | 0.18  | 0.00  | 0.00  | 0.04  |
| 79871 | FLJ13150 | 0.00  | 0.00  | 0.05  | 0.04  |
| 79872 | HAKAI    | 0.09  | 0.00  | 0.00  | -0.08 |
| 79873 | FLJ22494 | -0.09 | -0.25 | -0.10 | 0.25  |
| 79874 | FLJ23282 | 0.00  | 0.00  | 0.00  | NaN   |
| 79875 | FLJ13710 | 0.00  | 0.00  | 0.00  | NaN   |
| 79876 | FLJ23251 | 0.00  | 0.00  | 0.00  | NaN   |
| 79877 | FLJ22955 | 0.00  | -0.13 | 0.00  | 0.15  |
| 79879 | FLJ22349 | 0.00  | 0.00  | 0.05  | 0.08  |
| 79882 | FLJ11806 | 0.00  | 0.13  | 0.00  | 0.00  |
| 79883 | FLJ23447 | 0.00  | 0.00  | 0.00  | NaN   |
| 79884 | FLJ21159 | 0.00  | 0.00  | 0.00  | 0.16  |
| 79885 | FLJ22237 | 0.00  | 0.00  | -0.05 | 0.29  |
| 79886 | FLJ13657 | 0.00  | -0.25 | -0.05 | 0.63  |
| 79887 | FLJ22662 | -0.09 | 0.00  | 0.00  | 0.08  |
| 79888 | FLJ12443 | 0.00  | 0.13  | 0.10  | 0.43  |
| 79890 | RIN3     | 0.00  | 0.00  | 0.00  | NaN   |
| 79891 | FLJ23506 | 0.00  | 0.13  | 0.00  | 0.48  |
| 79892 | FLJ13081 | 0.00  | 0.00  | -0.05 | 0.18  |
| 79893 | LZK1     | 0.00  | -0.13 | 0.00  | 0.18  |

|       |          |       |       |       |       |
|-------|----------|-------|-------|-------|-------|
| 79894 | FLJ22301 | 0.00  | 0.00  | 0.00  | NaN   |
| 79895 | KIAA1939 | 0.18  | 0.00  | 0.00  | 0.16  |
| 79896 | FLJ22002 | -0.09 | 0.00  | 0.05  | 0.45  |
| 79897 | FLJ22638 | 0.00  | 0.00  | 0.00  | NaN   |
| 79898 | FLJ13590 | 0.00  | 0.00  | -0.05 | 0.22  |
| 79899 | FLJ14213 | 0.00  | 0.13  | 0.05  | -0.14 |
| 79901 | FLJ23462 | 0.00  | 0.00  | 0.00  | NaN   |
| 79902 | FLJ12549 | 0.00  | 0.13  | 0.00  | 0.11  |
| 79903 | FLJ14154 | 0.00  | 0.00  | 0.00  | NaN   |
| 79905 | FLJ21240 | 0.00  | 0.00  | 0.00  | NaN   |
| 79906 | FLJ13941 | 0.00  | 0.00  | 0.00  | NaN   |
| 79908 | FLJ21458 | 0.00  | 0.13  | -0.05 | 0.02  |
| 79912 | FLJ22028 | 0.00  | 0.00  | 0.00  | NaN   |
| 79913 | FLJ12785 | 0.00  | -0.13 | 0.00  | 0.08  |
| 79915 | FLJ12735 | 0.00  | 0.13  | 0.00  | -0.27 |
| 79918 | FLJ21148 | 0.00  | 0.00  | 0.00  | NaN   |
| 79919 | FLJ22671 | 0.00  | 0.00  | -0.05 | -0.04 |
| 79922 | FLJ22578 | 0.00  | -0.13 | 0.00  | 0.03  |
| 79923 | FLJ12581 | -0.09 | 0.00  | 0.00  | -0.15 |
| 79924 | FLJ21135 | 0.00  | -0.25 | 0.00  | -0.30 |
| 79927 | FLJ14050 | 0.00  | 0.00  | 0.00  | NaN   |
| 79929 | FLJ12748 | 0.09  | 0.00  | 0.00  | 0.71  |
| 79930 | FLJ22570 | 0.00  | 0.00  | 0.00  | NaN   |
| 79931 | FLJ21162 | 0.00  | 0.00  | 0.00  | NaN   |
| 79932 | FLJ14225 | 0.00  | 0.00  | 0.00  | NaN   |
| 79933 | FLJ12921 | 0.09  | 0.00  | 0.00  | -0.08 |
| 79934 | FLJ12229 | 0.00  | 0.00  | 0.00  | NaN   |
| 79935 | FLJ13265 | 0.00  | 0.00  | 0.00  | NaN   |
| 79937 | CASPR3   | 0.00  | 0.00  | 0.05  | -0.10 |
| 79939 | FLJ14251 | 0.00  | 0.00  | 0.00  | NaN   |
| 79940 | FLJ13189 | 0.00  | 0.00  | 0.05  | 0.11  |
| 79943 | FLJ14129 | 0.18  | 0.00  | 0.10  | 0.10  |
| 79944 | FLJ12618 | 0.00  | 0.00  | 0.00  | NaN   |
| 79946 | FLJ14280 | 0.00  | -0.13 | -0.05 | -0.24 |
| 79947 | FLJ13102 | -0.09 | 0.00  | 0.00  | 0.19  |
| 79949 | FLJ23537 | 0.09  | -0.13 | -0.05 | 0.37  |
| 79953 | C20orf39 | 0.00  | 0.00  | 0.00  | NaN   |
| 79954 | FLJ14075 | 0.00  | 0.00  | -0.05 | 0.01  |
| 79955 | FLJ23209 | 0.00  | -0.13 | -0.05 | 0.12  |
| 79956 | FLJ23309 | -0.09 | -0.13 | 0.00  | 0.34  |
| 79957 | FLJ22672 | 0.00  | 0.13  | 0.00  | -0.07 |
| 79958 | FLJ22757 | 0.00  | 0.00  | 0.00  | NaN   |
| 79959 | FLJ12542 | 0.00  | 0.00  | 0.00  | NaN   |
| 79960 | FLJ22479 | 0.00  | 0.00  | 0.00  | NaN   |
| 79961 | FLJ22457 | 0.09  | 0.00  | 0.00  | 0.34  |
| 79962 | FLJ13236 | 0.00  | 0.00  | 0.00  | NaN   |
| 79963 | FLJ14297 | 0.00  | -0.13 | -0.10 | 0.12  |

|       |           |       |       |       |       |
|-------|-----------|-------|-------|-------|-------|
| 79966 | FLJ21032  | 0.00  | 0.00  | 0.00  | NaN   |
| 79968 | FLJ12973  | 0.00  | 0.00  | 0.00  | NaN   |
| 79969 | FLJ13158  | 0.00  | 0.00  | 0.00  | NaN   |
| 79970 | FLJ12700  | 0.00  | 0.00  | -0.05 | 0.32  |
| 79971 | FLJ23091  | 0.00  | 0.00  | 0.00  | NaN   |
| 79973 | FLJ14356  | 0.00  | 0.00  | 0.00  | NaN   |
| 79974 | FLJ21986  | 0.00  | 0.13  | 0.00  | 0.15  |
| 79977 | FLJ13782  | 0.18  | 0.00  | 0.00  | 0.21  |
| 79980 | C20orf172 | 0.00  | -0.13 | 0.00  | 0.20  |
| 79981 | FLJ22615  | 0.00  | 0.00  | 0.05  | -0.21 |
| 79982 | FLJ14281  | 0.00  | 0.00  | 0.00  | NaN   |
| 79986 | FLJ12985  | 0.09  | 0.00  | -0.05 | 0.33  |
| 79987 | POLYDOM   | 0.00  | 0.00  | 0.00  | NaN   |
| 79989 | FLJ12571  | 0.00  | 0.00  | 0.00  | NaN   |
| 79990 | FLJ21019  | 0.00  | -0.13 | 0.00  | -0.11 |
| 79991 | FLJ22559  | 0.00  | -0.13 | -0.05 | 0.23  |
| 79998 | FLJ12056  | 0.00  | 0.00  | 0.00  | NaN   |
| 80000 | FLJ13687  | 0.00  | 0.00  | 0.00  | NaN   |
| 80003 | FLJ11383  | 0.09  | 0.00  | 0.00  | -0.10 |
| 80004 | FLJ21918  | -0.09 | -0.13 | 0.00  | -0.10 |
| 80005 | FLJ21034  | -0.09 | -0.25 | -0.05 | 0.12  |
| 80006 | FLJ13611  | 0.00  | 0.00  | 0.00  | NaN   |
| 80007 | FLJ13490  | 0.09  | 0.00  | -0.05 | 0.70  |
| 80008 | FLJ23235  | 0.00  | 0.00  | 0.05  | -0.16 |
| 80010 | FLJ12888  | 0.00  | 0.00  | 0.00  | NaN   |
| 80011 | NIP30     | -0.09 | 0.00  | 0.00  | 0.28  |
| 80012 | FLJ12729  | 0.09  | 0.00  | 0.00  | 0.25  |
| 80013 | FLJ13397  | 0.00  | 0.00  | 0.05  | -0.10 |
| 80014 | FLJ22029  | 0.00  | 0.00  | -0.05 | 0.26  |
| 80017 | FLJ20950  | 0.00  | 0.13  | 0.00  | 0.13  |
| 80019 | FLJ11807  | 0.00  | 0.00  | -0.05 | -0.04 |
| 80020 | FLJ23322  | -0.09 | 0.00  | 0.00  | 0.07  |
| 80021 | FLJ23375  | 0.00  | 0.00  | 0.00  | NaN   |
| 80022 | FLJ22686  | 0.18  | 0.13  | 0.00  | 0.17  |
| 80023 | C20orf98  | 0.00  | 0.00  | 0.05  | 0.33  |
| 80024 | FLJ22233  | 0.00  | 0.00  | 0.00  | NaN   |
| 80025 | C20orf48  | 0.00  | 0.00  | -0.05 | 0.30  |
| 80028 | FLJ11467  | 0.00  | 0.00  | 0.10  | 0.28  |
| 80031 | FLJ11598  | 0.00  | 0.00  | 0.00  | NaN   |
| 80032 | FLJ11637  | 0.00  | 0.00  | 0.00  | NaN   |
| 80034 | FLJ11703  | 0.00  | 0.00  | 0.00  | NaN   |
| 80035 | FLJ11722  | 0.00  | 0.00  | -0.05 | -0.11 |
| 80036 | FLJ11726  | 0.00  | 0.00  | 0.00  | NaN   |
| 80039 | FLJ11800  | -0.27 | 0.13  | -0.35 | 0.02  |
| 80045 | FLJ12132  | 0.00  | 0.00  | 0.00  | NaN   |
| 80054 | FLJ12355  | 0.00  | 0.00  | 0.05  | -0.21 |
| 80055 | FLJ12377  | 0.00  | 0.00  | 0.00  | NaN   |

|       |          |       |       |       |       |
|-------|----------|-------|-------|-------|-------|
| 80059 | FLJ12568 | 0.00  | 0.00  | 0.00  | NaN   |
| 80063 | FLJ12668 | 0.00  | 0.00  | 0.00  | NaN   |
| 80067 | FLJ13096 | 0.00  | 0.00  | 0.00  | NaN   |
| 80069 | FLJ13162 | 0.00  | 0.00  | 0.00  | NaN   |
| 80070 | FLJ13166 | 0.00  | 0.13  | 0.00  | 0.05  |
| 80071 | FLJ13215 | 0.00  | 0.00  | -0.10 | 0.15  |
| 80072 | FLJ13315 | 0.00  | 0.00  | 0.00  | NaN   |
| 80086 | TUBA4    | 0.00  | 0.00  | 0.00  | NaN   |
| 80095 | FLJ14260 | 0.00  | 0.13  | 0.00  | 0.33  |
| 80097 | FLJ14346 | 0.00  | 0.00  | -0.05 | -0.07 |
| 80099 | FLJ21075 | 0.00  | 0.00  | 0.00  | NaN   |
| 80108 | FLJ21628 | 0.00  | 0.00  | 0.00  | NaN   |
| 80110 | FLJ21941 | 0.00  | 0.00  | -0.05 | 0.32  |
| 80111 | FLJ22173 | 0.00  | 0.00  | 0.00  | NaN   |
| 80114 | FLJ22476 | 0.00  | 0.00  | 0.00  | NaN   |
| 80115 | FLJ22582 | -0.09 | 0.00  | 0.05  | 0.23  |
| 80117 | FLJ22595 | 0.00  | 0.00  | 0.00  | NaN   |
| 80122 | FLJ23074 | 0.00  | 0.00  | -0.05 | 0.03  |
| 80124 | FLJ23132 | 0.00  | 0.00  | 0.05  | 0.31  |
| 80125 | FLJ23168 | 0.00  | 0.00  | 0.00  | NaN   |
| 80127 | FLJ23189 | 0.00  | 0.00  | 0.00  | NaN   |
| 80128 | FLJ23229 | 0.27  | 0.13  | 0.00  | 0.34  |
| 80129 | FLJ23305 | 0.00  | 0.00  | 0.00  | NaN   |
| 80131 | FLJ23420 | 0.00  | 0.00  | 0.00  | NaN   |
| 80133 | FLJ23550 | 0.00  | 0.00  | 0.00  | NaN   |
| 80135 | RPF1     | 0.00  | 0.00  | 0.05  | 0.55  |
| 80142 | C9orf15  | -0.09 | 0.00  | 0.00  | 0.24  |
| 80143 | FLJ21168 | 0.18  | 0.00  | 0.10  | 0.72  |
| 80144 | FLJ22031 | 0.00  | 0.00  | 0.00  | NaN   |
| 80145 | FLJ23445 | 0.09  | 0.00  | -0.05 | 0.53  |
| 80146 | UXS1     | 0.00  | 0.00  | 0.00  | NaN   |
| 80148 | FLJ22378 | -0.09 | 0.00  | -0.25 | 0.36  |
| 80149 | FLJ23231 | 0.00  | 0.00  | 0.00  | NaN   |
| 80150 | FLJ22316 | -0.09 | 0.00  | 0.00  | -0.19 |
| 80152 | FLJ13111 | -0.09 | -0.13 | 0.00  | 0.11  |
| 80153 | FLJ21128 | 0.00  | 0.00  | 0.00  | NaN   |
| 80154 | FLJ22795 | 0.00  | 0.00  | 0.00  | NaN   |
| 80155 | FLJ13340 | 0.00  | 0.00  | 0.00  | NaN   |
| 80157 | FLJ21511 | 0.00  | 0.00  | 0.00  | NaN   |
| 80162 | FLJ22635 | -0.27 | -0.13 | -0.15 | 0.28  |
| 80167 | FLJ21106 | 0.00  | 0.00  | 0.00  | NaN   |
| 80168 | FLJ22644 | 0.18  | 0.00  | 0.05  | 0.17  |
| 80169 | FLJ22170 | 0.00  | 0.00  | 0.00  | NaN   |
| 80173 | CMG1     | 0.00  | -0.25 | -0.05 | 0.51  |
| 80174 | ASKL1    | 0.00  | -0.13 | 0.00  | -0.11 |
| 80176 | FLJ22393 | 0.00  | 0.00  | 0.00  | NaN   |
| 80177 | FLJ21269 | 0.00  | 0.00  | 0.00  | NaN   |

|       |          |       |       |       |       |
|-------|----------|-------|-------|-------|-------|
| 80178 | FLJ13909 | 0.00  | 0.00  | 0.00  | NaN   |
| 80179 | FLJ22865 | 0.00  | -0.13 | 0.00  | -0.04 |
| 80183 | FLJ21562 | 0.00  | 0.00  | -0.05 | 0.07  |
| 80184 | FLJ13615 | 0.09  | 0.13  | 0.00  | 0.23  |
| 80185 | FLJ23263 | 0.18  | -0.25 | -0.05 | 0.57  |
| 80194 | FLJ21749 | 0.36  | 0.00  | 0.05  | 0.54  |
| 80195 | FLJ13263 | 0.09  | 0.00  | 0.00  | 0.23  |
| 80196 | RNF34    | 0.00  | -0.13 | 0.00  | 0.41  |
| 80198 | MUS81    | -0.09 | 0.00  | 0.05  | 0.37  |
| 80199 | FLJ22688 | 0.00  | 0.00  | 0.00  | NaN   |
| 80201 | FLJ22761 | 0.00  | 0.00  | 0.00  | NaN   |
| 80204 | FLJ12673 | 0.00  | 0.00  | 0.00  | NaN   |
| 80205 | FLJ12178 | 0.00  | 0.00  | 0.00  | NaN   |
| 80206 | KIAA1695 | 0.00  | -0.13 | -0.30 | 0.14  |
| 80207 | OPA3     | 0.09  | 0.00  | 0.00  | 0.26  |
| 80208 | FLJ21439 | 0.00  | 0.00  | 0.00  | NaN   |
| 80209 | FLJ12661 | 0.00  | 0.00  | 0.00  | NaN   |
| 80210 | FLJ12584 | 0.00  | 0.00  | 0.00  | NaN   |
| 80212 | FLJ22471 | 0.00  | 0.00  | 0.00  | NaN   |
| 80213 | BLP2     | 0.00  | 0.00  | 0.00  | NaN   |
| 80215 | FLJ20856 | 0.00  | 0.00  | -0.05 | -0.08 |
| 80216 | FLJ22670 | 0.00  | 0.00  | 0.00  | NaN   |
| 80217 | FLJ22944 | 0.09  | -0.13 | -0.05 | 0.21  |
| 80218 | FLJ13194 | 0.00  | 0.00  | 0.00  | NaN   |
| 80219 | FLJ13448 | 0.00  | 0.00  | 0.00  | NaN   |
| 80221 | FLJ20920 | 0.00  | 0.25  | 0.00  | 0.50  |
| 80222 | FLJ12528 | 0.00  | 0.13  | 0.05  | 0.10  |
| 80223 | RCP      | 0.55  | -0.13 | 0.00  | 0.58  |
| 80224 | FLJ12660 | 0.00  | 0.00  | 0.00  | NaN   |
| 80227 | FLJ11848 | 0.09  | 0.13  | 0.00  | 0.58  |
| 80228 | CBCIP2   | 0.18  | 0.00  | 0.00  | 0.34  |
| 80230 | FLJ22251 | 0.00  | 0.00  | 0.05  | 0.23  |
| 80232 | FLJ21016 | 0.09  | 0.00  | 0.00  | 0.43  |
| 80233 | FLJ22175 | 0.00  | 0.00  | 0.00  | NaN   |
| 80235 | FLJ12768 | 0.18  | 0.00  | 0.00  | -0.13 |
| 80237 | FLJ22637 | 0.00  | 0.00  | 0.00  | NaN   |
| 80243 | FLJ12987 | 0.00  | 0.00  | 0.00  | NaN   |
| 80254 | FLJ13386 | 0.00  | 0.00  | 0.00  | NaN   |
| 80255 | FLJ22004 | 0.00  | 0.00  | 0.00  | NaN   |
| 80256 | FLJ11560 | -0.09 | 0.13  | 0.10  | 0.41  |
| 80262 | FLJ12076 | -0.09 | 0.00  | 0.00  | -0.22 |
| 80263 | FLJ13181 | 0.09  | 0.00  | 0.10  | 0.23  |
| 80264 | FLJ13659 | 0.00  | -0.25 | 0.00  | 0.38  |
| 80267 | C1orf22  | 0.00  | 0.00  | 0.05  | 0.50  |
| 80271 | ITPKC    | 0.00  | 0.00  | 0.00  | NaN   |
| 80273 | HMGE     | 0.00  | -0.13 | -0.10 | 0.06  |
| 80279 | C53      | 0.00  | 0.00  | 0.00  | 0.28  |

|       |            |       |       |       |       |
|-------|------------|-------|-------|-------|-------|
| 80301 | PP1628     | 0.00  | 0.00  | 0.00  | NaN   |
| 80303 | FLJ13612   | 0.00  | 0.00  | 0.00  | NaN   |
| 80304 | FLJ21945   | 0.09  | 0.00  | -0.05 | 0.21  |
| 80305 | PP2447     | 0.00  | -0.25 | 0.00  | 0.24  |
| 80306 | EG1        | 0.00  | 0.00  | -0.05 | 0.28  |
| 80307 | FER1L4     | 0.00  | 0.00  | 0.00  | NaN   |
| 80308 | PP591      | 0.09  | 0.13  | 0.00  | 0.32  |
| 80310 | SCDGF-B    | 0.00  | 0.13  | 0.00  | 0.06  |
| 80317 | ZNF306     | 0.00  | 0.00  | 0.00  | NaN   |
| 80319 | IDAX       | 0.00  | 0.00  | 0.00  | NaN   |
| 80321 | BITE       | 0.00  | 0.00  | 0.00  | NaN   |
| 80323 | SE57-1     | -0.09 | 0.00  | -0.20 | 0.34  |
| 80324 | PUS1       | 0.00  | 0.00  | 0.00  | NaN   |
| 80328 | ULBP2      | 0.00  | 0.00  | -0.05 | 0.06  |
| 80329 | ULBP1      | 0.00  | 0.00  | -0.05 | 0.25  |
| 80335 | PRO2730    | -0.09 | 0.00  | -0.10 | 0.35  |
| 80339 | C22orf20   | 0.00  | 0.00  | 0.05  | -0.08 |
| 80342 | DJ434O14.3 | 0.00  | 0.00  | 0.00  | NaN   |
| 80344 | PRO2389    | 0.00  | 0.00  | 0.00  | NaN   |
| 80345 | FLJ22191   | 0.00  | 0.00  | 0.00  | NaN   |
| 80346 | FLJ22246   | -0.09 | -0.25 | -0.10 | 0.26  |
| 80347 | NBP        | 0.00  | -0.13 | 0.00  | 0.30  |
| 80349 | REC14      | 0.00  | 0.00  | 0.00  | NaN   |
| 80350 | APOARGC    | 0.00  | 0.00  | -0.05 | -0.05 |
| 80351 | TNKS2      | 0.00  | 0.00  | 0.00  | NaN   |
| 80352 | HZFW1      | 0.00  | 0.00  | 0.00  | NaN   |
| 80380 | PDL2       | -0.09 | -0.13 | -0.05 | 0.18  |
| 80700 | UBXD1      | 0.00  | 0.00  | 0.00  | NaN   |
| 80704 | SLC19A3    | 0.00  | 0.00  | 0.00  | NaN   |
| 80705 | TSGA10     | 0.00  | 0.00  | 0.00  | NaN   |
| 80723 | MGC3295    | 0.00  | 0.00  | -0.05 | 0.12  |
| 80724 | MGC5601    | 0.00  | 0.00  | 0.00  | NaN   |
| 80736 | C6orf29    | 0.00  | 0.00  | 0.00  | NaN   |
| 80737 | C6orf27    | 0.00  | 0.00  | 0.00  | NaN   |
| 80739 | C6orf25    | 0.00  | 0.00  | 0.00  | NaN   |
| 80740 | C6orf24    | 0.00  | 0.00  | 0.00  | NaN   |
| 80741 | C6orf20    | 0.00  | 0.00  | 0.00  | NaN   |
| 80745 | MGC2454    | 0.00  | 0.00  | 0.00  | NaN   |
| 80746 | MGC2776    | 0.00  | 0.00  | 0.00  | NaN   |
| 80755 | MGC2744    | 0.00  | -0.13 | 0.00  | 0.20  |
| 80757 | MGC4659    | 0.00  | 0.00  | 0.00  | NaN   |
| 80758 | MGC10772   | 0.00  | 0.13  | 0.00  | 0.02  |
| 80759 | MGC10818   | 0.00  | 0.00  | 0.05  | -0.13 |
| 80760 | MGC10848   | 0.00  | 0.00  | 0.00  | NaN   |
| 80761 | MGC10902   | 0.00  | 0.00  | 0.00  | NaN   |
| 80762 | MGC10924   | 0.00  | 0.00  | 0.00  | NaN   |
| 80763 | MGC10946   | 0.00  | 0.00  | 0.00  | NaN   |



|       |             |       |       |       |       |
|-------|-------------|-------|-------|-------|-------|
| 80764 | MGC10963    | 0.00  | 0.13  | 0.00  | 0.46  |
| 80765 | STARD5      | 0.00  | 0.00  | 0.00  | NaN   |
| 80772 | MGC10334    | 0.00  | 0.00  | 0.05  | 0.00  |
| 80774 | MGC10986    | 0.27  | 0.13  | 0.00  | 0.04  |
| 80775 | MGC10993    | 0.00  | 0.00  | 0.00  | NaN   |
| 80776 | MGC4093     | 0.00  | 0.00  | -0.05 | -0.05 |
| 80777 | CYB5-M      | 0.00  | -0.13 | 0.05  | 0.46  |
| 80778 | MGC10520    | 0.18  | 0.00  | 0.10  | 0.45  |
| 80781 | COL18A1     | 0.00  | 0.00  | 0.00  | NaN   |
| 80789 | KIAA1698    | 0.00  | 0.00  | 0.00  | NaN   |
| 80830 | APOL6       | 0.00  | 0.00  | 0.00  | NaN   |
| 80831 | APOL5       | 0.00  | 0.00  | 0.00  | NaN   |
| 80853 | KIAA1718    | 0.00  | 0.00  | 0.00  | NaN   |
| 80864 | NG3         | 0.00  | 0.00  | 0.00  | NaN   |
| 80868 | HCGIV-6     | 0.00  | -0.13 | -0.15 | 0.07  |
| 80895 | ILKAP       | 0.00  | 0.00  | -0.05 | 0.46  |
| 80896 | C1orf13     | 0.00  | 0.00  | 0.00  | NaN   |
| 80975 | TMPRSS5     | 0.00  | 0.00  | 0.00  | NaN   |
| 81025 | GJA10       | 0.00  | 0.00  | 0.00  | NaN   |
| 81027 | TUBB1       | 0.18  | 0.25  | 0.00  | -0.07 |
| 81029 | WNT5B       | 0.00  | 0.00  | 0.05  | -0.01 |
| 81031 | SLC2A10     | 0.00  | 0.00  | 0.00  | NaN   |
| 81033 | ERG2        | 0.27  | 0.13  | 0.00  | 0.24  |
| 81034 | LOC81034    | 0.18  | 0.00  | 0.05  | 0.18  |
| 81035 | COLEC12     | 0.00  | 0.00  | 0.00  | NaN   |
| 81285 | OR51E2      | 0.00  | -0.13 | 0.00  | 0.08  |
| 81490 | PTDSS2      | -0.27 | -0.13 | -0.10 | 0.42  |
| 81491 | GPR63       | 0.00  | 0.00  | 0.00  | NaN   |
| 81492 | RSHL1       | 0.09  | 0.00  | 0.00  | 0.03  |
| 81493 | SYNCOILIN   | 0.00  | 0.00  | 0.00  | NaN   |
| 81494 | FHR5        | 0.00  | 0.13  | 0.00  | 0.02  |
| 81501 | LOC81501    | 0.18  | -0.25 | 0.05  | -0.14 |
| 81533 | CDA08       | -0.09 | 0.00  | 0.00  | 0.33  |
| 81537 | LOC81537    | 0.00  | 0.00  | -0.05 | 0.20  |
| 81539 | SLC38A1     | 0.00  | 0.00  | 0.00  | NaN   |
| 81542 | TXNDC       | 0.00  | 0.00  | 0.05  | 0.18  |
| 81543 | LRRC3       | 0.00  | 0.00  | 0.00  | NaN   |
| 81544 | PP1665      | 0.18  | 0.00  | 0.00  | 0.31  |
| 81545 | SP329       | 0.00  | 0.00  | 0.00  | NaN   |
| 81550 | FLJ21007    | 0.00  | 0.00  | -0.10 | 0.14  |
| 81551 | STMN4       | -0.09 | -0.25 | -0.10 | -0.29 |
| 81552 | DKFZP564K08 | 0.00  | 0.00  | 0.10  | 0.59  |
| 81553 | DKFZP566A15 | 0.09  | 0.00  | -0.10 | 0.32  |
| 81554 | DKFZP434D04 | -0.09 | 0.00  | 0.00  | 0.22  |
| 81555 | AF140225    | 0.00  | 0.00  | 0.00  | NaN   |
| 81556 | DKFZP564O16 | 0.00  | 0.00  | 0.00  | NaN   |
| 81558 | LOC81558    | 0.00  | 0.25  | 0.00  | 0.58  |

|       |             |       |       |       |       |
|-------|-------------|-------|-------|-------|-------|
| 81562 | DKFZP564L24 | 0.00  | 0.00  | 0.00  | NaN   |
| 81563 | C1orf21     | 0.00  | 0.00  | 0.05  | 0.00  |
| 81565 | NUDEL       | 0.00  | 0.00  | 0.00  | NaN   |
| 81566 | C12orf22    | 0.00  | 0.00  | 0.00  | NaN   |
| 81567 | MGC3178     | 0.00  | 0.00  | 0.00  | NaN   |
| 81569 | LOC81569    | -0.09 | 0.00  | 0.00  | -0.15 |
| 81570 | SKD3        | 0.00  | 0.00  | 0.00  | NaN   |
| 81571 | GL012       | 0.00  | 0.00  | 0.00  | NaN   |
| 81575 | DKFZP434F03 | -0.09 | 0.00  | 0.00  | 0.16  |
| 81576 | MGC10471    | 0.00  | 0.00  | 0.00  | NaN   |
| 81577 | MGC11335    | -0.09 | -0.13 | 0.00  | 0.17  |
| 81578 | COL21A1     | 0.00  | 0.13  | 0.00  | -0.03 |
| 81579 | PLA2G12     | 0.00  | 0.00  | 0.00  | NaN   |
| 81602 | NYD-SP15    | 0.00  | 0.13  | 0.00  | 0.39  |
| 81603 | RNF27       | 0.00  | -0.13 | -0.05 | 0.26  |
| 81605 | MGC2668     | 0.00  | 0.00  | 0.00  | NaN   |
| 81606 | DKFZP566J09 | 0.00  | 0.00  | 0.00  | NaN   |
| 81608 | DKFZP586K07 | 0.00  | 0.00  | 0.00  | NaN   |
| 81609 | MY014       | 0.00  | 0.00  | 0.05  | 0.34  |
| 81611 | LANP-L      | 0.00  | 0.13  | 0.05  | 0.41  |
| 81616 | PRTD-NY3    | 0.00  | 0.00  | 0.00  | NaN   |
| 81617 | FLJ12577    | 0.00  | 0.13  | 0.00  | 0.14  |
| 81618 | ITM3        | 0.00  | 0.00  | 0.00  | NaN   |
| 81619 | MGC11352    | 0.09  | 0.00  | 0.00  | 0.22  |
| 81620 | CDT1        | -0.09 | -0.13 | -0.05 | 0.33  |
| 81621 | FKSG28      | 0.00  | -0.13 | -0.05 | 0.12  |
| 81622 | UNC93B1     | 0.18  | 0.00  | 0.05  | 0.33  |
| 81623 | DEFB126     | 0.00  | 0.00  | 0.05  | -0.01 |
| 81624 | DIAPH3      | 0.00  | 0.00  | -0.10 | -0.08 |
| 81626 | C1orf14     | 0.00  | 0.00  | 0.00  | NaN   |
| 81627 | C1orf25     | 0.00  | 0.00  | 0.10  | 0.43  |
| 81628 | THG-1       | 0.18  | 0.00  | 0.00  | 0.21  |
| 81631 | MAP1A/1BLC3 | -0.09 | -0.13 | -0.05 | 0.51  |
| 81669 | HCLA-ISO    | 0.00  | 0.00  | 0.00  | NaN   |
| 81671 | VMP1        | 0.18  | 0.13  | 0.00  | 0.71  |
| 81689 | MGC4276     | 0.00  | 0.00  | 0.00  | NaN   |
| 81691 | LOC81691    | 0.00  | 0.00  | 0.00  | NaN   |
| 81696 | OR5V1       | 0.00  | 0.00  | 0.00  | NaN   |
| 81698 | C15orf5     | 0.00  | 0.00  | 0.00  | NaN   |
| 81788 | DKFZP434J03 | 0.00  | 0.13  | 0.00  | 0.35  |
| 81789 | DKFZP761E21 | 0.00  | 0.00  | 0.00  | NaN   |
| 81790 | DKFZP564A02 | 0.09  | 0.00  | -0.05 | 0.40  |
| 81792 | ADAMTS12    | 0.00  | 0.00  | 0.10  | 0.14  |
| 81796 | OATPRP4     | 0.00  | 0.00  | 0.00  | NaN   |
| 81797 | OR12D3      | 0.00  | 0.00  | 0.00  | NaN   |
| 81831 | NETO2       | -0.09 | 0.00  | -0.05 | 0.17  |
| 81833 | SPACA1      | 0.00  | 0.00  | 0.00  | NaN   |

|       |             |       |       |       |       |
|-------|-------------|-------|-------|-------|-------|
| 81847 | DKFZP434O14 | 0.00  | 0.00  | 0.05  | 0.66  |
| 81849 | MGC3184     | 0.00  | 0.00  | 0.00  | NaN   |
| 81850 | KRTAP1.3    | 0.00  | 0.25  | 0.00  | 0.24  |
| 81851 | KRTAP1.1    | 0.00  | 0.25  | 0.00  | -0.08 |
| 81853 | MGC1223     | 0.00  | 0.00  | 0.05  | 0.50  |
| 81854 | MGC3771     | 0.00  | 0.00  | 0.00  | NaN   |
| 81855 | BA108L7.2   | 0.00  | -0.13 | -0.05 | 0.30  |
| 81856 | MGC5384     | 0.09  | 0.00  | -0.05 | 0.03  |
| 81858 | DKFZP434N19 | 0.18  | 0.00  | 0.10  | 0.34  |
| 81870 | KRTAP9.9    | 0.00  | 0.38  | -0.05 | 0.00  |
| 81873 | MGC3038     | 0.00  | 0.00  | 0.00  | NaN   |
| 81875 | FLJ12671    | 0.00  | 0.13  | 0.00  | 0.28  |
| 81876 | RAB1B       | -0.09 | 0.00  | 0.05  | 0.11  |
| 81888 | HT036       | 0.00  | 0.00  | 0.00  | NaN   |
| 81890 | TGT         | 0.00  | -0.13 | 0.00  | 0.06  |
| 81892 | DC50        | 0.00  | 0.00  | 0.00  | NaN   |
| 81893 | LAT1-3TM    | 0.00  | 0.00  | 0.00  | NaN   |
| 81894 | MRS3/4      | 0.00  | -0.13 | -0.05 | 0.39  |
| 81926 | MGC:5244    | 0.00  | 0.00  | 0.00  | NaN   |
| 81929 | SEC13L      | 0.00  | 0.00  | 0.00  | NaN   |
| 81930 | DKFZP434G22 | 0.00  | 0.00  | 0.00  | NaN   |
| 81931 | FLJ12488    | 0.00  | 0.00  | 0.00  | NaN   |
| 81932 | MGC12904    | 0.00  | 0.00  | 0.00  | NaN   |
| 83394 | NIR1        | 0.00  | 0.00  | 0.00  | NaN   |
| 83439 | TCF-3       | 0.00  | 0.00  | 0.00  | NaN   |
| 83440 | DKFZP434B19 | 0.00  | 0.00  | 0.00  | NaN   |
| 83442 | SH3BGRL3    | -0.09 | 0.00  | 0.00  | 0.22  |
| 83443 | MGC3133     | 0.00  | 0.00  | 0.00  | NaN   |
| 83444 | PAPA-1      | 0.00  | 0.00  | 0.00  | NaN   |
| 83445 | MGC3146     | -0.09 | 0.00  | 0.00  | -0.24 |
| 83446 | DKFZP434K11 | 0.00  | 0.00  | 0.00  | NaN   |
| 83447 | DKFZP434N12 | 0.00  | 0.00  | 0.05  | 0.07  |
| 83448 | DKFZP434G14 | 0.00  | 0.13  | 0.00  | 0.12  |
| 83449 | DKFZP434G13 | 0.00  | 0.00  | 0.05  | -0.19 |
| 83450 | DKFZP586M11 | 0.00  | 0.00  | 0.05  | -0.06 |
| 83451 | PP1226      | -0.09 | 0.00  | 0.00  | 0.16  |
| 83452 | RAB33B      | 0.00  | 0.00  | 0.00  | NaN   |
| 83460 | MGC2963     | 0.00  | 0.00  | 0.00  | NaN   |
| 83461 | MGC2577     | -0.09 | 0.00  | 0.00  | 0.17  |
| 83463 | MAD3        | 0.00  | 0.13  | 0.00  | -0.10 |
| 83464 | DKFZP564D03 | 0.00  | 0.00  | 0.00  | NaN   |
| 83468 | LOC83468    | 0.00  | 0.00  | 0.00  | NaN   |
| 83475 | MGC4293     | 0.00  | 0.00  | 0.00  | NaN   |
| 83478 | DKFZP564B11 | 0.00  | 0.00  | 0.00  | NaN   |
| 83480 | FKSG32      | -0.09 | 0.00  | -0.10 | 0.37  |
| 83481 | EPPK1       | 0.18  | 0.00  | 0.10  | 0.25  |
| 83482 | SCRT1       | 0.18  | 0.00  | 0.10  | 0.00  |

|       |              |       |       |       |       |
|-------|--------------|-------|-------|-------|-------|
| 83483 | PLVAP        | -0.09 | 0.00  | 0.00  | -0.07 |
| 83637 | DKFZP761I212 | 0.00  | 0.00  | 0.00  | NaN   |
| 83638 | P5326        | -0.09 | 0.00  | 0.05  | 0.26  |
| 83660 | TLN2         | 0.00  | 0.00  | 0.00  | NaN   |
| 83696 | MGC4737      | 0.18  | 0.00  | 0.05  | 0.30  |
| 83714 | DKFZP761G19  | 0.00  | 0.00  | 0.05  | 0.03  |
| 83716 | DKFZP434B04  | -0.09 | 0.00  | -0.05 | 0.19  |
| 83729 | MGC4638      | 0.00  | 0.00  | 0.00  | NaN   |
| 83737 | ITCH         | 0.00  | 0.13  | 0.00  | 0.35  |
| 83743 | GRWD         | 0.09  | 0.00  | 0.00  | 0.15  |
| 83744 | BA526D8.4    | 0.00  | 0.00  | 0.00  | NaN   |
| 83759 | MGC10871     | 0.00  | 0.00  | 0.05  | 0.06  |
| 83941 | BBP          | 0.00  | 0.00  | 0.00  | NaN   |
| 83988 | NCALD        | 0.18  | 0.13  | 0.00  | -0.19 |
| 83989 | DKFZP564D17  | 0.00  | 0.00  | 0.00  | NaN   |
| 84059 | VLGR1        | 0.00  | 0.00  | 0.00  | NaN   |
| 84060 | DKFZP564O05  | 0.18  | 0.00  | 0.00  | 0.55  |
| 84065 | DKFZP564D04  | -0.09 | 0.00  | 0.00  | 0.23  |
| 84079 | DKFZP434L07  | 0.00  | 0.00  | 0.05  | 0.13  |
| 84084 | RAB6C        | 0.00  | 0.00  | -0.05 | -0.02 |
| 84099 | ID2B         | 0.09  | 0.00  | -0.05 | -0.03 |
| 84107 | ZIC4         | 0.00  | 0.00  | 0.00  | NaN   |
| 84124 | FLJ12298     | 0.18  | 0.00  | 0.00  | 0.41  |
| 84148 | MYST1        | 0.00  | 0.00  | 0.00  | NaN   |
| 84168 | TEM8         | 0.00  | 0.00  | 0.00  | NaN   |
| 84172 | Rpo1-2       | 0.00  | 0.00  | 0.00  | NaN   |
| 84179 | FLJ22269     | 0.00  | -0.13 | -0.10 | -0.21 |
| 84193 | FLJ23027     | 0.00  | 0.00  | 0.00  | NaN   |
| 84196 | FLJ23277     | -0.09 | 0.00  | 0.00  | 0.15  |
| 84218 | DKFZp434P22  | 0.00  | 1.00  | 0.00  | 0.68  |
| 84220 | RANBP2L1     | 0.00  | 0.00  | -0.05 | 0.07  |
| 84243 | DKFZp667O24  | -0.09 | -0.13 | 0.00  | 0.30  |
| 84263 | MGC10940     | 0.00  | 0.00  | 0.00  | NaN   |
| 84271 | KIAA1649     | 0.00  | 0.00  | 0.00  | NaN   |
| 84272 | MGC11061     | 0.00  | 0.00  | 0.00  | NaN   |
| 84296 | MGC14799     | 0.45  | -0.13 | -0.05 | 0.22  |
| 84298 | MGC14817     | 0.09  | 0.00  | 0.00  | -0.03 |
| 84364 | ZNF289       | 0.00  | 0.00  | 0.00  | NaN   |
| 84436 | KIAA1827     | 0.09  | 0.00  | -0.05 | 0.16  |
| 84516 | MGC3248      | 0.00  | 0.00  | -0.05 | 0.55  |
| 84525 | SMAP31       | 0.00  | 0.00  | 0.00  | NaN   |
| 84549 | LOC84549     | 0.09  | -0.25 | -0.05 | 0.61  |
| 84561 | SLC12A8      | 0.00  | 0.00  | 0.00  | NaN   |
| 84612 | PAR6B        | 0.18  | 0.13  | 0.00  | 0.04  |
| 84617 | TUBB-5       | 0.00  | 0.00  | 0.00  | NaN   |
| 84658 | EMR3         | 0.00  | -0.13 | 0.00  | -0.25 |
| 84669 | NY-REN-60    | 0.18  | 0.13  | 0.00  | 0.61  |

|       |          |       |       |       |       |
|-------|----------|-------|-------|-------|-------|
| 84705 | GTPBG3   | -0.09 | 0.00  | 0.00  | 0.08  |
| 84720 | MGC3079  | -0.09 | 0.13  | 0.10  | 0.60  |
| 84722 | DDA3     | 0.09  | 0.00  | 0.05  | 0.43  |
| 84747 | MGC5139  | 0.00  | -0.13 | 0.00  | 0.19  |
| 84752 | MGC4655  | -0.09 | 0.00  | 0.00  | 0.08  |
| 84759 | MGC10882 | 0.00  | 0.00  | 0.00  | NaN   |
| 84779 | MGC10646 | 0.00  | 0.00  | 0.00  | NaN   |
| 84789 | MGC2889  | 0.18  | 0.00  | 0.05  | 0.11  |
| 84790 | TUBA6    | 0.00  | 0.00  | 0.00  | NaN   |
| 84809 | MGC12760 | 0.09  | 0.00  | -0.10 | 0.52  |
| 84818 | IL17RL   | 0.00  | 0.00  | 0.00  | NaN   |
| 84820 | MGC13098 | 0.00  | 0.00  | 0.00  | NaN   |
| 84859 | MGC4126  | 0.18  | 0.00  | 0.00  | 0.35  |
| 84861 | FLJ14360 | 0.00  | 0.13  | 0.05  | 0.23  |
| 84864 | FLJ14393 | 0.00  | 0.00  | 0.00  | NaN   |
| 84890 | FLJ14547 | 0.00  | 0.00  | 0.00  | NaN   |
| 84901 | FLJ14639 | 0.00  | 0.00  | 0.00  | NaN   |
| 84928 | FLJ14803 | 0.00  | 0.25  | 0.05  | 0.36  |
| 84934 | FLJ14827 | 0.00  | 0.00  | 0.00  | NaN   |
| 84951 | FLJ14950 | 0.00  | 0.38  | 0.00  | 0.04  |
| 84975 | MGC11308 | 0.00  | 0.00  | 0.00  | NaN   |
| 84986 | MGC14258 | 0.00  | 0.00  | -0.05 | 0.12  |
| 85002 | MGC16279 | 0.00  | -0.25 | -0.15 | 0.14  |
| 85236 | H2B/S    | 0.00  | 0.00  | 0.00  | NaN   |
| 85352 | KIAA1644 | 0.00  | 0.00  | 0.05  | -0.01 |
| 85359 | DGCR6L   | 0.00  | 0.00  | 0.05  | 0.13  |
| 85360 | 7h3      | 0.00  | 0.00  | 0.05  | 0.43  |
| 85363 | TRIM5    | 0.00  | -0.13 | -0.05 | 0.13  |
| 85377 | KIAA1668 | 0.00  | 0.00  | 0.05  | 0.14  |
| 85452 | KIAA1751 | 0.00  | 0.00  | 0.00  | NaN   |
| 85453 | KIAA1750 | 0.00  | -0.25 | 0.00  | 0.14  |
| 85459 | KIAA1731 | 0.00  | 0.00  | -0.10 | 0.12  |
| 85476 | EFG1     | 0.00  | 0.00  | 0.00  | NaN   |
| 85477 | SCIN     | 0.00  | 0.13  | 0.05  | 0.00  |
| 89781 | HPS4     | 0.00  | 0.13  | 0.00  | 0.67  |
| 89845 | FLJ00002 | 0.00  | 0.00  | 0.00  | NaN   |
| 89853 | FLJ00001 | 0.00  | 0.00  | -0.05 | 0.12  |
| 89870 | TRIM15   | 0.00  | 0.00  | 0.00  | NaN   |
| 89874 | SLC25A21 | 0.00  | 0.00  | 0.00  | NaN   |
| 89910 | UBE3B    | 0.00  | 0.00  | 0.00  | NaN   |
| 89927 | BC008967 | 0.00  | 0.00  | 0.00  | NaN   |
| 89941 | LOC89941 | 0.00  | 0.00  | -0.05 | 0.32  |
| 89944 | LOC89944 | -0.09 | 0.00  | -0.10 | -0.15 |
| 90011 | FLJ00060 | 0.09  | 0.00  | 0.00  | -0.09 |
| 90233 | LOC90233 | 0.00  | 0.13  | 0.00  | -0.05 |
| 90273 | R29124_1 | 0.00  | 0.00  | -0.05 | 0.15  |
| 90326 | LOC90326 | 0.00  | 0.00  | 0.00  | NaN   |

|        |             |       |       |       |       |
|--------|-------------|-------|-------|-------|-------|
| 90355  | LOC90355    | 0.00  | 0.00  | 0.00  | NaN   |
| 90379  | LOC90379    | 0.00  | 0.00  | 0.00  | NaN   |
| 90480  | PLINP-1     | 0.00  | 0.00  | 0.00  | NaN   |
| 90627  | GT650       | 0.00  | 0.00  | 0.00  | NaN   |
| 90634  | CG018       | 0.00  | 0.00  | 0.00  | NaN   |
| 90864  | SSB-3       | 0.00  | 0.00  | 0.00  | NaN   |
| 90865  | DVS27       | -0.09 | -0.13 | -0.05 | 0.39  |
| 90956  | MGC20727    | 0.00  | 0.00  | 0.00  | NaN   |
| 90993  | OASIS       | 0.00  | 0.00  | 0.00  | NaN   |
| 91137  | LOC91137    | 0.00  | 0.00  | 0.00  | NaN   |
| 91227  | GGTL4       | 0.09  | 0.00  | 0.00  | 0.16  |
| 91289  | BC002942    | 0.00  | -0.25 | 0.00  | 0.17  |
| 91300  | LOC91300    | 0.00  | 0.00  | 0.00  | NaN   |
| 91369  | MGC15396    | 0.00  | 0.38  | 0.00  | 0.42  |
| 91543  | cig5        | 0.00  | 0.00  | -0.05 | 0.05  |
| 91647  | ATP12       | 0.00  | 0.00  | 0.05  | -0.04 |
| 91746  | KIAA1966    | 0.00  | 0.00  | 0.00  | NaN   |
| 91754  | NEK9        | 0.00  | 0.00  | 0.00  | NaN   |
| 91860  | MGC4809     | 0.00  | 0.00  | 0.00  | NaN   |
| 91949  | COG7        | 0.00  | 0.00  | -0.05 | 0.35  |
| 91977  | MYOZ3       | 0.00  | 0.00  | 0.00  | NaN   |
| 92086  | GGTLA4      | 0.00  | 0.00  | 0.05  | -0.01 |
| 92170  | LOC92170    | 0.00  | 0.00  | -0.10 | 0.52  |
| 92211  | KIAA1775    | 0.09  | 0.00  | -0.05 | -0.16 |
| 92342  | MGC9084     | 0.00  | 0.00  | 0.00  | NaN   |
| 92483  | LDHL        | 0.00  | 0.00  | 0.05  | -0.34 |
| 92579  | LOC92579    | 0.00  | -0.13 | 0.00  | 0.21  |
| 92595  | MGC13138    | 0.00  | 0.00  | 0.00  | NaN   |
| 92609  | LOC92609    | 0.09  | 0.00  | 0.00  | -0.29 |
| 92815  | MGC3165     | 0.09  | 0.00  | 0.00  | 0.34  |
| 93081  | LOC93081    | -0.09 | -0.13 | 0.05  | 0.55  |
| 93210  | MGC9753     | 0.00  | 1.00  | 0.00  | 0.87  |
| 93349  | LOC93349    | 0.00  | 0.00  | 0.00  | NaN   |
| 93408  | LOC93408    | 0.18  | 0.00  | 0.00  | 0.18  |
| 93436  | MGC19595    | 0.00  | 0.00  | 0.00  | NaN   |
| 93643  | TJP4        | 0.00  | 0.00  | 0.00  | NaN   |
| 94009  | SERHL       | 0.00  | 0.00  | 0.00  | NaN   |
| 94025  | MUC16       | 0.00  | 0.00  | 0.00  | NaN   |
| 94104  | C21orf66    | 0.00  | 0.00  | 0.00  | NaN   |
| 94239  | H2AV        | 0.00  | 0.00  | 0.00  | NaN   |
| 96764  | NCOA6IP     | 0.00  | 0.00  | 0.00  | NaN   |
| 103910 | MLC-B       | 0.09  | 0.00  | 0.00  | 0.34  |
| 112399 | EGLN3       | 0.00  | 0.00  | 0.00  | NaN   |
| 112869 | LOC112869   | 0.00  | 0.00  | 0.00  | NaN   |
| 112950 | MGC17544    | 0.00  | 0.00  | 0.00  | NaN   |
| 113146 | LOC113146   | 0.00  | 0.00  | 0.00  | NaN   |
| 113177 | IMAGE:42153 | 0.00  | 0.00  | 0.00  | NaN   |

|        |           |       |       |       |       |
|--------|-----------|-------|-------|-------|-------|
| 113178 | SCAMP-4   | 0.00  | 0.00  | 0.00  | NaN   |
| 113251 | LOC113251 | 0.00  | 0.00  | 0.00  | NaN   |
| 113791 | MGC17330  | 0.00  | 0.00  | 0.00  | NaN   |
| 113878 | DTX2      | 0.00  | 0.00  | 0.00  | NaN   |
| 114049 | WBSCR22   | -0.09 | 0.00  | 0.00  | 0.23  |
| 114088 | TRIM9     | 0.00  | 0.00  | 0.05  | 0.05  |
| 114548 | CIAS1     | 0.00  | 0.13  | 0.00  | 0.32  |
| 114625 | ERMAP     | 0.00  | 0.00  | 0.00  | NaN   |
| 114785 | KIAA1887  | 0.00  | 0.00  | 0.00  | NaN   |
| 114791 | KIAA1899  | 0.00  | 0.00  | 0.05  | 0.12  |
| 114819 | KIAA1922  | 0.00  | 0.00  | 0.00  | NaN   |
| 114876 | OSBPL1A   | 0.00  | 0.00  | -0.15 | 0.50  |
| 114881 | OSBPL7    | 0.00  | 0.00  | 0.00  | 0.12  |
| 114882 | OSBPL8    | 0.00  | 0.00  | 0.00  | NaN   |
| 114883 | OSBPL9    | 0.00  | 0.00  | 0.00  | NaN   |
| 114884 | OSBPL10   | 0.00  | 0.00  | 0.00  | NaN   |
| 114885 | OSBPL11   | 0.00  | 0.00  | 0.00  | NaN   |
| 114897 | C1QTNF1   | 0.00  | 0.25  | 0.00  | -0.04 |
| 114899 | C1QTNF3   | 0.00  | 0.00  | 0.10  | -0.05 |
| 115207 | LOC115207 | -0.09 | 0.13  | -0.10 | 0.37  |
| 115290 | FBG4      | 0.00  | 0.13  | 0.00  | 0.06  |
| 116039 | OSR2      | 0.09  | 0.13  | 0.10  | 0.53  |
| 116138 | PEAS      | 0.00  | 0.00  | 0.00  | NaN   |
| 116150 | LOC116150 | -0.09 | 0.00  | 0.05  | 0.56  |
| 116496 | C1orf24   | 0.00  | 0.00  | 0.10  | 0.34  |
| 116832 | RPL39L    | 0.09  | 0.00  | 0.05  | 0.25  |
| 116984 | CENTD1    | 0.00  | 0.00  | 0.00  | NaN   |
| 116985 | CENTD2    | 0.00  | 0.00  | 0.00  | NaN   |
| 116986 | CENTG1    | 0.00  | 0.00  | 0.00  | NaN   |
| 116987 | CENTG2    | 0.00  | 0.00  | -0.05 | 0.58  |
| 117246 | FTSJ3     | 0.27  | 0.13  | 0.00  | 0.61  |
| 117247 | SLC16A10  | 0.00  | 0.00  | 0.05  | -0.13 |
| 118433 | RPL23AP7  | 0.00  | 0.00  | 0.00  | NaN   |
| 119016 | MRIP2     | 0.18  | 0.25  | 0.20  | -0.02 |
| 124583 | LOC124583 | 0.00  | 0.25  | 0.00  | 0.28  |
| 131566 | ESDN      | 0.00  | 0.00  | 0.00  | NaN   |
| 131601 | TPRA40    | 0.00  | 0.00  | 0.00  | NaN   |
| 133619 | LOC133619 | 0.00  | 0.00  | 0.00  | NaN   |
| 140465 | MLC1SA    | 0.00  | 0.00  | 0.00  | NaN   |
| 140467 | ZNF358    | 0.00  | 0.00  | 0.00  | NaN   |
| 140545 | RNF32     | 0.00  | 0.00  | -0.05 | 0.06  |
| 140801 | RPL10L    | 0.00  | 0.00  | 0.00  | NaN   |
| 140803 | TRPM6     | 0.00  | 0.00  | -0.05 | -0.09 |
| 140885 | PTPNS1    | 0.00  | 0.00  | 0.05  | 0.15  |
| 150726 | KIAA1940  | 0.00  | 0.00  | 0.00  | NaN   |
| 154661 | MGC26655  | 0.00  | 0.00  | 0.00  | NaN   |
| 169522 | Kv11.1    | 0.00  | -0.13 | -0.10 | 0.04  |

|        |          |       |       |       |      |
|--------|----------|-------|-------|-------|------|
| 171017 | TNRC1    | -0.09 | 0.00  | 0.00  | 0.11 |
| 171392 | TIZ      | 0.00  | -0.38 | 0.00  | 0.48 |
| 171546 | MGC24447 | 0.00  | 0.00  | 0.00  | NaN  |
| 171558 | PTCRA    | 0.00  | 0.00  | 0.00  | NaN  |
| 171586 | LABH3    | 0.00  | 0.00  | -0.05 | 0.26 |
| 192286 | MGC2198  | 0.00  | 0.00  | 0.00  | NaN  |
| 192683 | SCAMP5   | 0.00  | 0.00  | 0.00  | NaN  |
