# Supplementary material for: A network-based, integrative study to identify core biological pathways that drive breast cancer clinical subtypes
Source: PubMed Central journal article supplement (PMC3304402; doi:10.1038/bjc.2011.584), 2012-02-16
Supplement: bjc2011584x6.pdf [file bjc2011584x6.pdf]

### Chin et al. ER+

| Information on driver network genes |                                                                      |                                                                                                                                                                                         |                                                                                         |
|-------------------------------------|----------------------------------------------------------------------|-----------------------------------------------------------------------------------------------------------------------------------------------------------------------------------------|-----------------------------------------------------------------------------------------|
| Gene Name                           | Median expression in ER+ group - Median gene expression in ER- group | Amplification and expression status (Amplified = 1, Differentially expressed = 2, Both amplified and differentially expressed = 12, Neither amplified nor differentially expressed = 0) | Frequency of appearance in the network from resampling (min = 0, max = 1, cutoff = 0.5) |
| AP1G1                               | 2.09                                                                 | 2                                                                                                                                                                                       | 1.00                                                                                    |
| AR                                  | 1.30                                                                 | 2                                                                                                                                                                                       | 1.00                                                                                    |
| CCND1                               | 0.43                                                                 | 1                                                                                                                                                                                       | 1.00                                                                                    |
| BCL2                                | 0.85                                                                 | 2                                                                                                                                                                                       | 1.00                                                                                    |
| CCNG2                               | 0.54                                                                 | 2                                                                                                                                                                                       | 0.68                                                                                    |
| CLTC                                | 0.07                                                                 | 1                                                                                                                                                                                       | 1.00                                                                                    |
| DDX5                                | 0.07                                                                 | 1                                                                                                                                                                                       | 1.00                                                                                    |
| ERBB3                               | 0.55                                                                 | 2                                                                                                                                                                                       | 1.00                                                                                    |
| ESR1                                | 2.44                                                                 | 2                                                                                                                                                                                       | 1.00                                                                                    |
| FOXA1                               | 2.10                                                                 | 2                                                                                                                                                                                       | 1.00                                                                                    |
| IGF1R                               | 0.96                                                                 | 2                                                                                                                                                                                       | 1.00                                                                                    |
| IL6ST                               | 0.65                                                                 | 2                                                                                                                                                                                       | 0.83                                                                                    |
| IRS1                                | 0.69                                                                 | 2                                                                                                                                                                                       | 0.72                                                                                    |
| ITGB5                               | 0.80                                                                 | 2                                                                                                                                                                                       | 0.66                                                                                    |
| KRT18                               | 0.70                                                                 | 2                                                                                                                                                                                       | 1.00                                                                                    |
| MAPT                                | 1.23                                                                 | 2                                                                                                                                                                                       | 1.00                                                                                    |
| MYB                                 | 1.64                                                                 | 2                                                                                                                                                                                       | 1.00                                                                                    |
| PHB                                 | -0.13                                                                | 1                                                                                                                                                                                       | 1.00                                                                                    |
| PRKAR1A                             | 0.35                                                                 | 1                                                                                                                                                                                       | 0.89                                                                                    |
| PRKDC                               | -0.41                                                                | 1                                                                                                                                                                                       | 1.00                                                                                    |
| PSMC5                               | 0.11                                                                 | 1                                                                                                                                                                                       | 1.00                                                                                    |
| PTK2                                | 0.12                                                                 | 1                                                                                                                                                                                       | 1.00                                                                                    |
| RARA                                | 0.46                                                                 | 2                                                                                                                                                                                       | 0.98                                                                                    |

| Information on the driver network |             |                                                    |                                                                         |
|-----------------------------------|-------------|----------------------------------------------------|-------------------------------------------------------------------------|
| Source gene                       | Target gene | Source of interaction (HPRD = 1, KEGG = 2, TF = 3) | Differential expression correlation between genes in ER+ and ER- groups |
| AR                                | CCND1       | 1                                                  | 0.04                                                                    |
| AR                                | ESR1        | 1                                                  | -0.12                                                                   |
| AR                                | FOXA1       | 1                                                  | -0.52                                                                   |
| AR                                | IL6ST       | 1                                                  | -0.30                                                                   |
| AR                                | SPDEF       | 1                                                  | -0.99                                                                   |
| CCND1                             | ESR1        | 1                                                  | -0.30                                                                   |
| BCL2                              | IRS1        | 1                                                  | 0.64                                                                    |
| BCL2                              | TMBIM6      | 1                                                  | 0.17                                                                    |
| BCL2                              | BECN1       | 1                                                  | 1.19                                                                    |
| BCL2                              | BCLAF1      | 1                                                  | 1.30                                                                    |
| BCL2                              | MOAP1       | 1                                                  | 1.22                                                                    |
| CLTC                              | AP1G1       | 1                                                  | 0.12                                                                    |
| DDX5                              | ESR1        | 1                                                  | -0.20                                                                   |
| ERBB3                             | IL6ST       | 1                                                  | -0.73                                                                   |
| ESR1                              | CCNG2       | 3                                                  | 0.93                                                                    |
| ESR1                              | IGF1R       | 1                                                  | -0.16                                                                   |
| ESR1                              | RARA        | 1                                                  | -0.35                                                                   |
| ESR1                              | SMARCA2     | 1                                                  | 1.28                                                                    |
| ESR1                              | TFF1        | 3                                                  | -0.54                                                                   |
| ESR1                              | XBP1        | 1                                                  | 0.11                                                                    |
| ESR1                              | SLC9A3R1    | 3                                                  | -0.39                                                                   |
| ESR1                              | CELSR1      | 1                                                  | -0.02                                                                   |
| FOXA1                             | TFF1        | 3                                                  | -0.26                                                                   |

|          |       |   |      |
|----------|-------|---|------|
| RET      | 0.66  | 2 | 0.76 |
| RPS6KB1  | -0.05 | 1 | 1.00 |
| SLC22A5  | 0.76  | 2 | 0.64 |
| SMARCA2  | 0.35  | 0 | 1.00 |
| TMBIM6   | 0.33  | 2 | 0.81 |
| TFF1     | 2.98  | 2 | 1.00 |
| XBP1     | 0.95  | 2 | 1.00 |
| XPA      | 0.27  | 2 | 0.80 |
| YWHAZ    | -0.36 | 1 | 1.00 |
| SPOP     | 0.03  | 1 | 1.00 |
| BECN1    | 0.30  | 0 | 1.00 |
| GPAA1    | -0.16 | 1 | 1.00 |
| ASH2L    | 0.09  | 1 | 1.00 |
| DEDD     | 0.04  | 1 | 1.00 |
| SLC9A3R1 | 0.71  | 2 | 0.64 |
| BAG4     | 0.03  | 1 | 1.00 |
| CELSR1   | 1.09  | 2 | 1.00 |
| BCLAF1   | -0.04 | 0 | 1.00 |
| VAV3     | 0.89  | 2 | 1.00 |
| APPBP2   | 0.33  | 1 | 1.00 |
| NPRL2    | 0.46  | 2 | 0.85 |
| SPDEF    | 1.22  | 2 | 1.00 |
| PIGT     | 0.38  | 2 | 0.94 |
| PRR13    | 0.27  | 2 | 0.95 |
| SSH3     | 0.42  | 2 | 0.90 |
| EPN3     | 0.18  | 1 | 1.00 |
| MOAP1    | 0.33  | 0 | 1.00 |

|         |          |   |       |
|---------|----------|---|-------|
| FOXA1   | XBP1     | 1 | -0.07 |
| IGF1R   | IRS1     | 1 | 0.05  |
| IGF1R   | VAV3     | 1 | 0.36  |
| PHB     | AR       | 1 | -0.69 |
| PRKAR1A | NPRL2    | 1 | 0.72  |
| PRKDC   | AR       | 1 | 0.78  |
| PRKDC   | XPA      | 1 | -0.31 |
| PRKDC   | BECN1    | 1 | -0.04 |
| PSMC5   | ESR1     | 1 | -0.66 |
| PTK2    | ERBB3    | 1 | 0.21  |
| PTK2    | IGF1R    | 1 | 0.16  |
| PTK2    | IRS1     | 1 | 0.17  |
| PTK2    | ITGB5    | 1 | 0.14  |
| PTK2    | RET      | 1 | 0.33  |
| RPS6KB1 | MAPT     | 1 | -0.37 |
| SLC22A5 | SLC9A3R1 | 1 | -0.29 |
| TFF1    | ESR1     | 1 | -0.54 |
| TFF1    | FOXA1    | 1 | -0.26 |
| YWHAZ   | IGF1R    | 1 | -0.12 |
| YWHAZ   | IRS1     | 1 | -0.56 |
| YWHAZ   | KRT18    | 1 | 0.72  |
| YWHAZ   | MAPT     | 1 | 0.37  |
| YWHAZ   | SSH3     | 1 | 0.09  |
| SPOP    | AR       | 1 | -0.35 |
| GPAA1   | PIGT     | 1 | 0.04  |
| GPAA1   | PRR13    | 1 | 0.24  |
| ASH2L   | MYB      | 1 | -0.50 |
| DEDD    | KRT18    | 1 | 0.49  |
| BAG4    | BCL2     | 1 | 0.00  |
| APPBP2  | AR       | 1 | -0.26 |
| EPN3    | ERBB3    | 2 | 0.20  |
| EPN3    | IGF1R    | 2 | -0.06 |
| EPN3    | RET      | 2 | -0.40 |

**Chin et al. HER2+**

| <b>Information on driver network genes</b> |                                                                          |                                                                                                                                                                                         |                                                                                         |
|--------------------------------------------|--------------------------------------------------------------------------|-----------------------------------------------------------------------------------------------------------------------------------------------------------------------------------------|-----------------------------------------------------------------------------------------|
| Gene Name                                  | Median expression in HER2+ group - Median gene expression in HER2- group | Amplification and expression status (Amplified = 1, Differentially expressed = 2, Both amplified and differentially expressed = 12, Neither amplified nor differentially expressed = 0) | Frequency of appearance in the network from resampling (min = 0, max = 1, cutoff = 0.5) |
| AANAT                                      | 0.05                                                                     | 2                                                                                                                                                                                       | 0.65                                                                                    |
| AKT2                                       | -0.16                                                                    | 2                                                                                                                                                                                       | 0.53                                                                                    |
| CCND1                                      | -0.34                                                                    | 1                                                                                                                                                                                       | 1.00                                                                                    |
| CDH2                                       | 0.26                                                                     | 2                                                                                                                                                                                       | 0.60                                                                                    |
| LYST                                       | 0.42                                                                     | 2                                                                                                                                                                                       | 0.53                                                                                    |
| CSNK2A1                                    | -0.37                                                                    | 0                                                                                                                                                                                       | 0.70                                                                                    |
| ERBB2                                      | 1.90                                                                     | 12                                                                                                                                                                                      | 1.00                                                                                    |
| FGFR4                                      | 1.07                                                                     | 2                                                                                                                                                                                       | 1.00                                                                                    |
| FUS                                        | -0.39                                                                    | 0                                                                                                                                                                                       | 1.00                                                                                    |
| GRB2                                       | 0.12                                                                     | 1                                                                                                                                                                                       | 1.00                                                                                    |
| GRB7                                       | 1.96                                                                     | 12                                                                                                                                                                                      | 1.00                                                                                    |
| HIF1A                                      | 0.47                                                                     | 2                                                                                                                                                                                       | 0.72                                                                                    |
| HSP90AA1                                   | 0.37                                                                     | 2                                                                                                                                                                                       | 0.99                                                                                    |
| IFI27                                      | 0.76                                                                     | 2                                                                                                                                                                                       | 0.70                                                                                    |
| KRT6B                                      | 1.59                                                                     | 2                                                                                                                                                                                       | 0.51                                                                                    |
| KRT7                                       | 0.46                                                                     | 2                                                                                                                                                                                       | 0.64                                                                                    |
| KRT15                                      | 0.82                                                                     | 2                                                                                                                                                                                       | 0.51                                                                                    |
| KRT17                                      | 0.91                                                                     | 2                                                                                                                                                                                       | 1.00                                                                                    |
| MAP3K3                                     | -0.06                                                                    | 1                                                                                                                                                                                       | 0.99                                                                                    |
| PDE3B                                      | 0.14                                                                     | 2                                                                                                                                                                                       | 0.60                                                                                    |
| MED1                                       | 0.10                                                                     | 1                                                                                                                                                                                       | 1.00                                                                                    |
| PRKAR1A                                    | -0.38                                                                    | 1                                                                                                                                                                                       | 0.89                                                                                    |
| MAPK11                                     | 0.35                                                                     | 2                                                                                                                                                                                       | 0.59                                                                                    |

| <b>Information on the driver network</b> |             |                                                    |                                                                             |
|------------------------------------------|-------------|----------------------------------------------------|-----------------------------------------------------------------------------|
| Source gene                              | Target gene | Source of interaction (HPRD = 1, KEGG = 2, TF = 3) | Differential expression correlation between genes in HER2+ and HER2- groups |
| AKT2                                     | HSP90AA1    | 1                                                  | -0.67                                                                       |
| AKT2                                     | PDE3B       | 2                                                  | -0.65                                                                       |
| CCND1                                    | IFI27       | 1                                                  | -1.04                                                                       |
| CCND1                                    | THRA        | 1                                                  | 0.39                                                                        |
| CDH2                                     | FGFR4       | 1                                                  | 0.16                                                                        |
| LYST                                     | YWHAZ       | 1                                                  | -0.17                                                                       |
| ERBB2                                    | GRB2        | 2                                                  | 0.30                                                                        |
| ERBB2                                    | GRB7        | 1                                                  | -0.90                                                                       |
| ERBB2                                    | HSP90AA1    | 1                                                  | 0.41                                                                        |
| GRB2                                     | FGFR4       | 2                                                  | 0.01                                                                        |
| GRB2                                     | GRB7        | 1                                                  | -1.07                                                                       |
| GRB2                                     | KRT7        | 1                                                  | 0.55                                                                        |
| GRB2                                     | KRT17       | 1                                                  | 0.36                                                                        |
| GRB2                                     | CCL5        | 1                                                  | -0.48                                                                       |
| GRB2                                     | TFAP2B      | 1                                                  | 0.45                                                                        |
| GRB2                                     | TP63        | 1                                                  | 0.43                                                                        |
| GRB2                                     | EPPK1       | 1                                                  | 0.38                                                                        |
| HIF1A                                    | HSP90AA1    | 1                                                  | -0.69                                                                       |
| KRT6B                                    | KRT15       | 1                                                  | 0.31                                                                        |
| KRT7                                     | KRT17       | 1                                                  | 0.21                                                                        |
| KRT15                                    | PSMC5       | 1                                                  | 0.26                                                                        |
| MAP3K3                                   | HSP90AA1    | 1                                                  | -0.75                                                                       |
| MAP3K3                                   | MAP2K3      | 2                                                  | 0.62                                                                        |

|          |       |   |      |
|----------|-------|---|------|
| MAP2K3   | 0.24  | 1 | 0.70 |
| PSMC5    | 0.04  | 1 | 0.87 |
| PSMD11   | -0.15 | 1 | 0.82 |
| PTH1R    | 0.24  | 2 | 0.63 |
| PTN      | 0.54  | 2 | 0.71 |
| CCL5     | 0.51  | 2 | 0.62 |
| SLC9A3   | 0.24  | 2 | 0.58 |
| TFAP2B   | 2.38  | 2 | 1.00 |
| THRA     | 0.35  | 2 | 1.00 |
| YWHAZ    | -0.57 | 1 | 1.00 |
| TP63     | 0.29  | 2 | 0.68 |
| OASL     | 0.53  | 2 | 0.68 |
| SLC9A3R1 | -0.01 | 1 | 0.94 |
| MED24    | 1.25  | 2 | 1.00 |
| TOM1L1   | -0.35 | 1 | 0.61 |
| GLYAT    | 0.19  | 2 | 0.60 |
| KIF1C    | 0.23  | 2 | 0.70 |
| EPN3     | -0.14 | 1 | 1.00 |
| EPPK1    | 0.51  | 2 | 0.70 |

|          |         |   |       |
|----------|---------|---|-------|
| MAP3K3   | YWHAZ   | 1 | 0.80  |
| MED1     | THRA    | 1 | 0.53  |
| MED1     | MED24   | 1 | 0.08  |
| PRKAR1A  | GRB2    | 1 | 0.80  |
| PRKAR1A  | PDE3B   | 2 | 0.97  |
| MAP2K3   | MAPK11  | 2 | -1.01 |
| PSMD11   | PTN     | 1 | -0.43 |
| PTN      | GLYAT   | 1 | -0.94 |
| THRA     | FUS     | 1 | 1.33  |
| THRA     | OASL    | 1 | -0.67 |
| THRA     | MED24   | 1 | 0.44  |
| YWHAZ    | AANAT   | 1 | -0.89 |
| YWHAZ    | KIF1C   | 1 | -0.46 |
| SLC9A3R1 | PTH1R   | 1 | -0.13 |
| SLC9A3R1 | SLC9A3  | 1 | 0.39  |
| TOM1L1   | GRB2    | 1 | 0.48  |
| KIF1C    | CSNK2A1 | 1 | 1.37  |
| EPN3     | FGFR4   | 2 | 0.19  |

Chin et al. TN

| Information on driver network genes |                                                                            |                                                                                                                                                                                         |                                                                                         |
|-------------------------------------|----------------------------------------------------------------------------|-----------------------------------------------------------------------------------------------------------------------------------------------------------------------------------------|-----------------------------------------------------------------------------------------|
| Gene Name                           | Median expression in TNBC group - Median gene expression in non-TNBC group | Amplification and expression status (Amplified = 1, Differentially expressed = 2, Both amplified and differentially expressed = 12, Neither amplified nor differentially expressed = 0) | Frequency of appearance in the network from resampling (min = 0, max = 1, cutoff = 0.5) |
| ARNT                                | 0.02                                                                       | 1                                                                                                                                                                                       | 0.86                                                                                    |
| ATP1B3                              | 0.41                                                                       | 2                                                                                                                                                                                       | 0.76                                                                                    |
| KLF5                                | 0.94                                                                       | 2                                                                                                                                                                                       | 0.99                                                                                    |
| CDKN2A                              | 0.79                                                                       | 2                                                                                                                                                                                       | 0.58                                                                                    |
| CSF2RB                              | 0.74                                                                       | 2                                                                                                                                                                                       | 1.00                                                                                    |
| EGFR                                | 1.17                                                                       | 2                                                                                                                                                                                       | 1.00                                                                                    |
| ENO1                                | 0.75                                                                       | 2                                                                                                                                                                                       | 0.82                                                                                    |
| ESR1                                | -2.34                                                                      | 0                                                                                                                                                                                       | 1.00                                                                                    |
| FANCA                               | 0.39                                                                       | 2                                                                                                                                                                                       | 0.54                                                                                    |
| FOLR1                               | 1.05                                                                       | 2                                                                                                                                                                                       | 0.92                                                                                    |
| GPM6B                               | 1.13                                                                       | 2                                                                                                                                                                                       | 1.00                                                                                    |
| GRB2                                | 0.03                                                                       | 0                                                                                                                                                                                       | 0.77                                                                                    |
| NR3C1                               | 0.09                                                                       | 0                                                                                                                                                                                       | 0.94                                                                                    |
| HSF1                                | 0.11                                                                       | 1                                                                                                                                                                                       | 0.94                                                                                    |
| HSPA1A                              | 0.66                                                                       | 2                                                                                                                                                                                       | 0.94                                                                                    |
| ICAM1                               | 0.71                                                                       | 2                                                                                                                                                                                       | 0.67                                                                                    |
| IGHM                                | 0.75                                                                       | 2                                                                                                                                                                                       | 0.95                                                                                    |
| IL7R                                | 0.68                                                                       | 2                                                                                                                                                                                       | 0.84                                                                                    |
| IMPA2                               | 0.90                                                                       | 2                                                                                                                                                                                       | 0.95                                                                                    |
| EIF3E                               | 0.18                                                                       | 1                                                                                                                                                                                       | 0.95                                                                                    |
| KRT17                               | 1.60                                                                       | 2                                                                                                                                                                                       | 1.00                                                                                    |
| LYN                                 | 0.79                                                                       | 2                                                                                                                                                                                       | 1.00                                                                                    |
| MCM3                                | 0.39                                                                       | 2                                                                                                                                                                                       | 0.59                                                                                    |

| Information on the driver network |             |                                                    |                                                                               |
|-----------------------------------|-------------|----------------------------------------------------|-------------------------------------------------------------------------------|
| Source gene                       | Target gene | Source of interaction (HPRD = 1, KEGG = 2, TF = 3) | Differential expression correlation between genes in TNBC and non-TNBC groups |
| ARNT                              | ENO1        | 3                                                  | 0.96                                                                          |
| CDKN2A                            | MCM5        | 1                                                  | 0.83                                                                          |
| CDKN2A                            | CDC7        | 1                                                  | -0.92                                                                         |
| CSF2RB                            | LYN         | 1                                                  | 0.22                                                                          |
| CSF2RB                            | SYK         | 1                                                  | -0.06                                                                         |
| CSF2RB                            | YWHAZ       | 1                                                  | -0.70                                                                         |
| EGFR                              | ESR1        | 1                                                  | 1.18                                                                          |
| EGFR                              | GPM6B       | 1                                                  | -1.08                                                                         |
| EGFR                              | HSPA1A      | 1                                                  | -0.98                                                                         |
| EGFR                              | ICAM1       | 1                                                  | 0.06                                                                          |
| EGFR                              | KRT17       | 1                                                  | -0.99                                                                         |
| EGFR                              | LYN         | 1                                                  | -0.95                                                                         |
| EGFR                              | MET         | 1                                                  | 0.19                                                                          |
| EGFR                              | NCK1        | 2                                                  | -0.14                                                                         |
| EGFR                              | PLCG2       | 2                                                  | -0.73                                                                         |
| EGFR                              | PLD1        | 1                                                  | 1.31                                                                          |
| EGFR                              | TGFA        | 1                                                  | 0.41                                                                          |
| EGFR                              | UCHL1       | 1                                                  | -0.05                                                                         |
| EGFR                              | YWHAZ       | 1                                                  | -0.04                                                                         |
| ENO1                              | FANCA       | 1                                                  | 0.74                                                                          |
| ENO1                              | YWHAZ       | 1                                                  | 0.05                                                                          |
| FOLR1                             | LYN         | 1                                                  | -0.13                                                                         |
| HSF1                              | HSPA1A      | 3                                                  | -0.04                                                                         |

|         |       |   |      |
|---------|-------|---|------|
| MCM5    | 0.51  | 2 | 0.61 |
| MET     | 0.68  | 2 | 0.62 |
| MSN     | 0.51  | 2 | 0.91 |
| NCK1    | 0.48  | 2 | 0.73 |
| PLA2G4A | 0.64  | 2 | 1.00 |
| PLCB4   | 0.92  | 2 | 1.00 |
| PLCG2   | 0.69  | 2 | 0.99 |
| PLD1    | 0.14  | 0 | 1.00 |
| PLEC    | -0.10 | 1 | 1.00 |
| POU2AF1 | 1.19  | 2 | 0.77 |
| PRKDC   | 0.27  | 1 | 1.00 |
| PTK2    | 0.08  | 1 | 1.00 |
| PTPRC   | 0.73  | 2 | 0.56 |
| S100A1  | 1.33  | 2 | 0.94 |
| S100B   | 0.51  | 2 | 1.00 |
| SEL1L   | -0.09 | 0 | 0.95 |
| SFRP1   | 1.94  | 2 | 1.00 |
| SYK     | 0.44  | 2 | 0.77 |
| TGFA    | 0.82  | 2 | 0.86 |
| UCHL1   | 0.97  | 2 | 0.69 |
| VCAM1   | 0.64  | 2 | 0.78 |
| YES1    | 0.51  | 2 | 0.66 |
| YWHAZ   | 0.39  | 1 | 1.00 |
| CDC7    | 0.72  | 2 | 0.55 |
| FZD6    | 0.45  | 1 | 1.00 |
| BAG4    | -0.04 | 1 | 0.94 |
| NDRG1   | 0.90  | 2 | 0.94 |
| IGF2BP3 | 0.29  | 2 | 1.00 |
| IGF2BP2 | 0.74  | 2 | 0.65 |
| WWP1    | -0.74 | 1 | 1.00 |
| PTP4A3  | 0.23  | 1 | 0.90 |
| STK38   | 0.40  | 2 | 0.98 |
| PUF60   | 0.18  | 1 | 1.00 |
| WWTR1   | 0.50  | 2 | 0.94 |

|         |         |   |       |
|---------|---------|---|-------|
| HSF1    | PRKDC   | 1 | 0.01  |
| HSPA1A  | NR3C1   | 1 | 1.21  |
| HSPA1A  | YWHAZ   | 1 | -0.12 |
| ICAM1   | MSN     | 1 | -0.31 |
| ICAM1   | PLCG2   | 2 | 0.23  |
| IGHM    | SEL1L   | 1 | 1.17  |
| IL7R    | LYN     | 1 | 0.01  |
| EIF3E   | NDRG1   | 1 | 0.38  |
| KRT17   | UCHL1   | 1 | 0.17  |
| LYN     | PLCG2   | 1 | 0.12  |
| LYN     | PRKDC   | 1 | 0.24  |
| LYN     | PTPRC   | 1 | 0.00  |
| LYN     | SYK     | 2 | 0.12  |
| MCM3    | MCM5    | 1 | 0.38  |
| MCM3    | CDC7    | 1 | -0.04 |
| MCM5    | CDC7    | 1 | -0.04 |
| MSN     | SYK     | 1 | 0.16  |
| MSN     | VCAM1   | 1 | 0.09  |
| PLCB4   | IMPA2   | 2 | -0.11 |
| PLCB4   | PLCG2   | 2 | -0.17 |
| PLCB4   | CALML5  | 2 | -0.35 |
| PLCG2   | IMPA2   | 2 | -0.23 |
| PLCG2   | PLA2G4A | 2 | -0.06 |
| PLCG2   | SYK     | 1 | 0.18  |
| PLCG2   | CALML5  | 2 | -0.07 |
| PLEC    | EGFR    | 1 | 0.58  |
| PLEC    | MSN     | 1 | -0.13 |
| POU2AF1 | SYK     | 1 | 0.18  |
| PTK2    | EGFR    | 1 | 0.16  |
| PTK2    | IGHM    | 1 | 0.75  |
| PTK2    | LYN     | 1 | 0.27  |
| PTK2    | NCK1    | 1 | 0.29  |
| PTK2    | SYK     | 1 | -0.46 |
| PTK2    | YES1    | 1 | 0.23  |

|        |       |   |      |
|--------|-------|---|------|
| PABPC1 | 0.11  | 1 | 0.95 |
| USP21  | -0.19 | 1 | 0.69 |
| LSM1   | 0.14  | 1 | 0.67 |
| CALML5 | 0.93  | 2 | 1.00 |

|        |         |   |       |
|--------|---------|---|-------|
| S100A1 | S100B   | 1 | 0.30  |
| S100B  | NDRG1   | 1 | 0.04  |
| S100B  | STK38   | 1 | -0.19 |
| SYK    | GRB2    | 1 | 1.15  |
| SYK    | PLD1    | 2 | -0.56 |
| YWHAZ  | STK38   | 1 | -0.35 |
| YWHAZ  | WWTR1   | 1 | 0.11  |
| FZD6   | PLCB4   | 2 | -0.16 |
| FZD6   | SFRP1   | 1 | 0.57  |
| BAG4   | HSPA1A  | 1 | -0.20 |
| WWP1   | KLF5    | 1 | 0.55  |
| WWP1   | EGFR    | 2 | -0.31 |
| WWP1   | MET     | 2 | -0.34 |
| PTP4A3 | ATP1B3  | 1 | 0.20  |
| PTP4A3 | MCM3    | 1 | 0.23  |
| PUF60  | IGF2BP3 | 1 | 0.18  |
| PUF60  | IGF2BP2 | 1 | 0.32  |
| PABPC1 | NDRG1   | 1 | 0.10  |
| USP21  | UCHL1   | 1 | 0.34  |
| LSM1   | PTPRC   | 1 | -0.45 |

Andre et al. ER+

| Information on driver network genes |                                                                      |                                                                                                                                                                                         |                                                                                         |
|-------------------------------------|----------------------------------------------------------------------|-----------------------------------------------------------------------------------------------------------------------------------------------------------------------------------------|-----------------------------------------------------------------------------------------|
| Gene Name                           | Median expression in ER+ group - Median gene expression in ER- group | Amplification and expression status (Amplified = 1, Differentially expressed = 2, Both amplified and differentially expressed = 12, Neither amplified nor differentially expressed = 0) | Frequency of appearance in the network from resampling (min = 0, max = 1, cutoff = 0.5) |
| AP1G1                               | 1.38                                                                 | 2                                                                                                                                                                                       | 1.00                                                                                    |
| AR                                  | 0.79                                                                 | 2                                                                                                                                                                                       | 1.00                                                                                    |
| ARL3                                | 0.44                                                                 | 2                                                                                                                                                                                       | 0.80                                                                                    |
| CCND1                               | 0.76                                                                 | 12                                                                                                                                                                                      | 1.00                                                                                    |
| BCL2                                | 0.56                                                                 | 2                                                                                                                                                                                       | 0.58                                                                                    |
| BCL2L1                              | 0.86                                                                 | 2                                                                                                                                                                                       | 1.00                                                                                    |
| CLTC                                | 0.10                                                                 | 1                                                                                                                                                                                       | 1.00                                                                                    |
| DDX5                                | 0.13                                                                 | 1                                                                                                                                                                                       | 1.00                                                                                    |
| NQO1                                | 0.69                                                                 | 2                                                                                                                                                                                       | 0.96                                                                                    |
| ERBB3                               | 0.57                                                                 | 2                                                                                                                                                                                       | 0.98                                                                                    |
| ESR1                                | 1.69                                                                 | 2                                                                                                                                                                                       | 1.00                                                                                    |
| FGFR2                               | 0.93                                                                 | 2                                                                                                                                                                                       | 0.54                                                                                    |
| FGR                                 | 0.68                                                                 | 2                                                                                                                                                                                       | 0.82                                                                                    |
| BLOC1S1                             | 0.16                                                                 | 2                                                                                                                                                                                       | 0.72                                                                                    |
| GFRA1                               | 0.62                                                                 | 2                                                                                                                                                                                       | 0.99                                                                                    |
| FOXA1                               | 0.96                                                                 | 2                                                                                                                                                                                       | 1.00                                                                                    |
| HSP90AA1                            | -0.07                                                                | 0                                                                                                                                                                                       | 1.00                                                                                    |
| IGF1R                               | 0.78                                                                 | 2                                                                                                                                                                                       | 1.00                                                                                    |
| IKBKB                               | 0.78                                                                 | 2                                                                                                                                                                                       | 0.86                                                                                    |
| IL6ST                               | 0.72                                                                 | 2                                                                                                                                                                                       | 1.00                                                                                    |
| INSM1                               | 0.64                                                                 | 2                                                                                                                                                                                       | 0.54                                                                                    |
| IRS1                                | 0.56                                                                 | 2                                                                                                                                                                                       | 0.99                                                                                    |
| ITGB5                               | 0.58                                                                 | 2                                                                                                                                                                                       | 0.70                                                                                    |

| Information on the driver network |             |                                                    |                                                                         |
|-----------------------------------|-------------|----------------------------------------------------|-------------------------------------------------------------------------|
| Source gene                       | Target gene | Source of interaction (HPRD = 1, KEGG = 2, TF = 3) | Differential expression correlation between genes in ER+ and ER- groups |
| AP1G1                             | RABEP1      | 1                                                  | -0.01                                                                   |
| AR                                | CCND1       | 1                                                  | -0.27                                                                   |
| AR                                | ESR1        | 1                                                  | -0.24                                                                   |
| AR                                | FOXA1       | 1                                                  | -0.37                                                                   |
| AR                                | IL6ST       | 1                                                  | -0.08                                                                   |
| AR                                | PHB         | 1                                                  | -0.45                                                                   |
| AR                                | TP53        | 1                                                  | 0.43                                                                    |
| AR                                | SPOP        | 1                                                  | 0.08                                                                    |
| AR                                | APPBP2      | 1                                                  | -0.13                                                                   |
| AR                                | SPDEF       | 1                                                  | -0.29                                                                   |
| ARL3                              | TP53        | 1                                                  | 0.23                                                                    |
| CCND1                             | ESR1        | 1                                                  | -0.02                                                                   |
| CCND1                             | INSM1       | 1                                                  | -0.25                                                                   |
| CCND1                             | NPDC1       | 1                                                  | 0.12                                                                    |
| BCL2                              | BCL2L1      | 1                                                  | 0.67                                                                    |
| BCL2                              | IRS1        | 1                                                  | 0.14                                                                    |
| BCL2                              | PPP2R5A     | 1                                                  | 0.71                                                                    |
| BCL2                              | TMBIM6      | 1                                                  | 0.03                                                                    |
| BCL2                              | TP53        | 2                                                  | -0.04                                                                   |
| BCL2                              | BECN1       | 1                                                  | 0.90                                                                    |
| BCL2L1                            | IRS1        | 1                                                  | -0.12                                                                   |
| BCL2L1                            | TMBIM6      | 1                                                  | -0.17                                                                   |
| BCL2L1                            | TP53        | 1                                                  | 0.28                                                                    |



|         |       |    |      |
|---------|-------|----|------|
| KRT18   | 0.64  | 2  | 0.81 |
| MAPT    | 1.21  | 2  | 1.00 |
| MAP3K3  | -0.01 | 1  | 0.86 |
| SCGB2A2 | 1.77  | 2  | 0.82 |
| MUC1    | 0.94  | 2  | 0.93 |
| MYB     | 0.68  | 2  | 0.79 |
| PGR     | 0.86  | 2  | 0.97 |
| PHB     | 0.21  | 1  | 1.00 |
| PPP2R5A | 0.19  | 2  | 0.92 |
| PRKAR1A | 0.28  | 1  | 0.71 |
| PRKDC   | -0.17 | 1  | 1.00 |
| PSMC5   | 0.06  | 1  | 1.00 |
| PTK2    | -0.09 | 1  | 1.00 |
| RARA    | 0.50  | 2  | 0.76 |
| RET     | 0.82  | 2  | 1.00 |
| RPS6KB1 | 0.07  | 1  | 1.00 |
| SMARCD3 | 0.39  | 2  | 0.54 |
| TMBIM6  | 0.34  | 2  | 1.00 |
| TFF1    | 2.09  | 2  | 1.00 |
| TP53    | 1.04  | 2  | 0.82 |
| UBC     | 0.15  | 0  | 1.00 |
| XBP1    | 0.90  | 2  | 1.00 |
| YWHAZ   | -0.16 | 1  | 1.00 |
| ZNF24   | 0.31  | 2  | 0.51 |
| AKAP1   | 0.14  | 1  | 0.65 |
| SPOP    | 0.25  | 12 | 1.00 |
| BECN1   | 0.37  | 2  | 1.00 |
| FADD    | 0.12  | 1  | 0.83 |
| NOL3    | 0.90  | 2  | 0.68 |
| ASH2L   | 0.14  | 1  | 0.79 |
| RABEP1  | 0.44  | 2  | 1.00 |
| DEDD    | 0.05  | 1  | 0.81 |
| BAG4    | 0.13  | 1  | 0.58 |
| CELSR1  | 0.57  | 2  | 0.98 |

|         |          |   |       |
|---------|----------|---|-------|
| BCL2L1  | BECN1    | 1 | 0.18  |
| CLTC    | AP1G1    | 1 | -0.30 |
| DDX5    | ESR1     | 1 | 0.67  |
| DDX5    | TP53     | 1 | 0.07  |
| NQO1    | TP53     | 1 | 0.03  |
| ERBB3   | IL6ST    | 1 | 0.22  |
| ERBB3   | MUC1     | 1 | -0.12 |
| ESR1    | BCL2L1   | 3 | -0.25 |
| ESR1    | NQO1     | 3 | -0.68 |
| ESR1    | BLOC1S1  | 1 | 0.16  |
| ESR1    | HSP90AA1 | 1 | 1.10  |
| ESR1    | IGF1R    | 1 | -0.05 |
| ESR1    | MUC1     | 3 | -0.04 |
| ESR1    | PGR      | 3 | 0.16  |
| ESR1    | RARA     | 1 | -0.19 |
| ESR1    | SMARCD3  | 1 | 0.61  |
| ESR1    | TFF1     | 3 | -0.10 |
| ESR1    | TP53     | 3 | 0.56  |
| ESR1    | UBC      | 1 | 1.11  |
| ESR1    | XBP1     | 1 | 0.14  |
| ESR1    | CELSR1   | 1 | 0.04  |
| ESR1    | MED16    | 1 | 1.12  |
| ESR1    | HEXIM1   | 1 | 0.96  |
| GFRA1   | RET      | 1 | -0.11 |
| FOXA1   | TFF1     | 3 | -0.32 |
| FOXA1   | XBP1     | 1 | 0.07  |
| IGF1R   | IRS1     | 1 | -0.31 |
| IGF1R   | VAV3     | 1 | 0.06  |
| IKBKB   | IRS1     | 2 | 0.13  |
| MAPT    | PPP2R5A  | 1 | -0.11 |
| MAP3K3  | IKBKB    | 1 | -0.38 |
| SCGB2A2 | SCGB1D2  | 1 | 0.12  |
| MUC1    | ESR1     | 1 | -0.04 |
| MUC1    | TP53     | 1 | 0.06  |

|          |      |    |      |
|----------|------|----|------|
| KIAA0232 | 0.20 | 2  | 1.00 |
| MED16    | 0.20 | 0  | 1.00 |
| VAV3     | 0.57 | 2  | 1.00 |
| APPBP2   | 0.35 | 1  | 1.00 |
| HEXIM1   | 0.28 | 2  | 0.54 |
| SCGB1D2  | 2.04 | 2  | 0.82 |
| SPDEF    | 1.19 | 2  | 0.99 |
| SSH3     | 0.75 | 2  | 0.86 |
| EPN3     | 0.70 | 12 | 1.00 |
| NPDC1    | 0.52 | 2  | 0.57 |
| KCNK15   | 1.24 | 2  | 1.00 |

|         |          |   |       |
|---------|----------|---|-------|
| PGR     | ESR1     | 1 | 0.16  |
| PHB     | TP53     | 1 | -0.08 |
| PRKDC   | AR       | 1 | 0.41  |
| PRKDC   | IKBKB    | 1 | 0.06  |
| PRKDC   | TP53     | 2 | -0.46 |
| PRKDC   | BECN1    | 1 | -0.30 |
| PSMC5   | ESR1     | 1 | 0.98  |
| PTK2    | ERBB3    | 1 | 0.17  |
| PTK2    | FGR      | 1 | 0.04  |
| PTK2    | IGF1R    | 1 | -0.12 |
| PTK2    | IRS1     | 1 | -0.08 |
| PTK2    | ITGB5    | 1 | -0.18 |
| PTK2    | RET      | 1 | 0.96  |
| PTK2    | TP53     | 1 | -0.49 |
| RPS6KB1 | MAPT     | 1 | 0.01  |
| TFF1    | ESR1     | 1 | -0.10 |
| TFF1    | FOXA1    | 1 | -0.32 |
| TP53    | ESR1     | 1 | 0.56  |
| TP53    | ZNF24    | 1 | -0.01 |
| TP53    | SCGB1D2  | 3 | -0.02 |
| YWHAZ   | IGF1R    | 1 | 0.09  |
| YWHAZ   | IRS1     | 1 | -0.08 |
| YWHAZ   | KRT18    | 1 | -0.12 |
| YWHAZ   | MAPT     | 1 | 0.22  |
| YWHAZ   | TP53     | 1 | -0.66 |
| YWHAZ   | KIAA0232 | 1 | 0.22  |
| YWHAZ   | SSH3     | 1 | -0.67 |
| YWHAZ   | KCNK15   | 1 | 0.11  |
| AKAP1   | PRKAR1A  | 1 | -0.06 |
| FADD    | NOL3     | 1 | -0.15 |
| ASH2L   | MYB      | 1 | -0.62 |
| DEDD    | KRT18    | 1 | 0.15  |
| DEDD    | FADD     | 1 | -0.38 |
| BAG4    | BCL2     | 1 | 0.01  |

|      |       |   |       |
|------|-------|---|-------|
| EPN3 | ERBB3 | 2 | -0.18 |
| EPN3 | FGFR2 | 2 | 0.07  |
| EPN3 | IGF1R | 2 | -0.04 |
| EPN3 | RET   | 2 | -0.09 |

Andre et al. HER2+

| Information on driver network genes |                                                                          |                                                                                                                                                                                         |                                                                                         |
|-------------------------------------|--------------------------------------------------------------------------|-----------------------------------------------------------------------------------------------------------------------------------------------------------------------------------------|-----------------------------------------------------------------------------------------|
| Gene Name                           | Median expression in HER2+ group - Median gene expression in HER2- group | Amplification and expression status (Amplified = 1, Differentially expressed = 2, Both amplified and differentially expressed = 12, Neither amplified nor differentially expressed = 0) | Frequency of appearance in the network from resampling (min = 0, max = 1, cutoff = 0.5) |
| CDC6                                | -0.19                                                                    | 1                                                                                                                                                                                       | 0.83                                                                                    |
| CLTC                                | 0.33                                                                     | 1                                                                                                                                                                                       | 0.99                                                                                    |
| MAPK14                              | 0.03                                                                     | 0                                                                                                                                                                                       | 0.72                                                                                    |
| ERBB2                               | 1.52                                                                     | 12                                                                                                                                                                                      | 1.00                                                                                    |
| FGFR4                               | 0.64                                                                     | 2                                                                                                                                                                                       | 0.53                                                                                    |
| GRK6                                | 0.34                                                                     | 2                                                                                                                                                                                       | 0.55                                                                                    |
| GRB2                                | 0.14                                                                     | 1                                                                                                                                                                                       | 1.00                                                                                    |
| GRB7                                | 1.07                                                                     | 12                                                                                                                                                                                      | 1.00                                                                                    |
| UBE2K                               | -0.13                                                                    | 0                                                                                                                                                                                       | 0.75                                                                                    |
| HSPA1A                              | 0.87                                                                     | 2                                                                                                                                                                                       | 1.00                                                                                    |
| KRT7                                | 0.71                                                                     | 2                                                                                                                                                                                       | 0.71                                                                                    |
| SMAD2                               | -0.10                                                                    | 0                                                                                                                                                                                       | 0.72                                                                                    |
| MAP3K10                             | 0.19                                                                     | 2                                                                                                                                                                                       | 0.94                                                                                    |
| NUMA1                               | 0.70                                                                     | 2                                                                                                                                                                                       | 0.56                                                                                    |
| ORC5L                               | 0.69                                                                     | 2                                                                                                                                                                                       | 0.79                                                                                    |
| PHB                                 | -0.05                                                                    | 1                                                                                                                                                                                       | 0.96                                                                                    |
| PML                                 | 0.69                                                                     | 2                                                                                                                                                                                       | 0.72                                                                                    |
| MED1                                | 0.50                                                                     | 12                                                                                                                                                                                      | 0.99                                                                                    |
| RAD21                               | -0.05                                                                    | 1                                                                                                                                                                                       | 0.59                                                                                    |
| RB1                                 | 0.20                                                                     | 0                                                                                                                                                                                       | 0.72                                                                                    |
| TFAP2B                              | 1.57                                                                     | 2                                                                                                                                                                                       | 1.00                                                                                    |
| TFF1                                | 0.52                                                                     | 2                                                                                                                                                                                       | 0.51                                                                                    |
| UBE2I                               | -0.50                                                                    | 2                                                                                                                                                                                       | 0.75                                                                                    |

| Information on the driver network |             |                                                    |                                                                             |
|-----------------------------------|-------------|----------------------------------------------------|-----------------------------------------------------------------------------|
| Source gene                       | Target gene | Source of interaction (HPRD = 1, KEGG = 2, TF = 3) | Differential expression correlation between genes in HER2+ and HER2- groups |
| CDC6                              | ORC5L       | 2                                                  | 0.13                                                                        |
| CLTC                              | MAP3K10     | 1                                                  | 0.20                                                                        |
| CLTC                              | EHD1        | 1                                                  | 0.02                                                                        |
| ERBB2                             | GRB2        | 2                                                  | 0.82                                                                        |
| ERBB2                             | GRB7        | 1                                                  | 0.36                                                                        |
| GRK6                              | SLC9A3R1    | 1                                                  | 0.15                                                                        |
| GRB2                              | FGFR4       | 2                                                  | 0.69                                                                        |
| GRB2                              | GRB7        | 1                                                  | 0.29                                                                        |
| GRB2                              | KRT7        | 1                                                  | 0.88                                                                        |
| GRB2                              | TFAP2B      | 1                                                  | 0.54                                                                        |
| GRB2                              | BLNK        | 1                                                  | -0.42                                                                       |
| HSPA1A                            | KRT7        | 1                                                  | -0.17                                                                       |
| MAP3K10                           | PHB         | 1                                                  | -0.22                                                                       |
| PML                               | MAPK14      | 1                                                  | 1.31                                                                        |
| PML                               | SMAD2       | 1                                                  | 1.29                                                                        |
| PML                               | RB1         | 1                                                  | 1.29                                                                        |
| PML                               | UBE2I       | 1                                                  | 0.37                                                                        |
| MED1                              | TFF1        | 1                                                  | 0.15                                                                        |
| MED1                              | MED24       | 1                                                  | -0.50                                                                       |
| RAD21                             | NUMA1       | 1                                                  | -0.20                                                                       |
| TFAP2B                            | UBE2I       | 1                                                  | -0.34                                                                       |
| UBE2I                             | UBE2K       | 1                                                  | 1.31                                                                        |
| UBE2I                             | PRPF40A     | 1                                                  | 1.31                                                                        |

|          |      |   |      |
|----------|------|---|------|
| YWHAZ    | 0.12 | 1 | 1.00 |
| SLC9A3R1 | 0.13 | 1 | 0.82 |
| MED24    | 0.34 | 2 | 0.85 |
| EHD1     | 1.01 | 2 | 0.83 |
| BLNK     | 0.26 | 2 | 0.66 |
| EPN3     | 0.24 | 1 | 0.57 |
| PRPF40A  | 0.04 | 0 | 0.75 |

|       |        |   |       |
|-------|--------|---|-------|
| YWHAZ | HSPA1A | 1 | -1.21 |
| EPN3  | FGFR4  | 2 | 0.35  |

Andre et al. TN

| Information on driver network genes |                                                                            |                                                                                                                                                                                         |                                                                                         |
|-------------------------------------|----------------------------------------------------------------------------|-----------------------------------------------------------------------------------------------------------------------------------------------------------------------------------------|-----------------------------------------------------------------------------------------|
| Gene Name                           | Median expression in TNBC group - Median gene expression in non-TNBC group | Amplification and expression status (Amplified = 1, Differentially expressed = 2, Both amplified and differentially expressed = 12, Neither amplified nor differentially expressed = 0) | Frequency of appearance in the network from resampling (min = 0, max = 1, cutoff = 0.5) |
| ANXA1                               | 0.49                                                                       | 2                                                                                                                                                                                       | 0.56                                                                                    |
| ARNT                                | 0.17                                                                       | 1                                                                                                                                                                                       | 0.88                                                                                    |
| COL9A3                              | 1.68                                                                       | 2                                                                                                                                                                                       | 0.99                                                                                    |
| CP                                  | 0.74                                                                       | 2                                                                                                                                                                                       | 0.82                                                                                    |
| EGFR                                | 0.79                                                                       | 2                                                                                                                                                                                       | 1.00                                                                                    |
| EPB41L2                             | 0.69                                                                       | 2                                                                                                                                                                                       | 0.76                                                                                    |
| GPM6B                               | 0.99                                                                       | 2                                                                                                                                                                                       | 1.00                                                                                    |
| ICAM1                               | 0.37                                                                       | 2                                                                                                                                                                                       | 0.66                                                                                    |
| IGHM                                | 0.55                                                                       | 2                                                                                                                                                                                       | 0.73                                                                                    |
| EIF3E                               | 0.16                                                                       | 1                                                                                                                                                                                       | 0.99                                                                                    |
| KRT17                               | 0.75                                                                       | 2                                                                                                                                                                                       | 1.00                                                                                    |
| MET                                 | 0.80                                                                       | 2                                                                                                                                                                                       | 0.99                                                                                    |
| MSN                                 | 0.54                                                                       | 2                                                                                                                                                                                       | 0.59                                                                                    |
| PIK3CG                              | 0.54                                                                       | 2                                                                                                                                                                                       | 0.61                                                                                    |
| PLEC                                | -0.10                                                                      | 1                                                                                                                                                                                       | 1.00                                                                                    |
| PTK2                                | 0.19                                                                       | 1                                                                                                                                                                                       | 1.00                                                                                    |
| S100A7                              | 0.67                                                                       | 2                                                                                                                                                                                       | 0.51                                                                                    |
| SFRP1                               | 1.47                                                                       | 2                                                                                                                                                                                       | 1.00                                                                                    |
| YWHAZ                               | 0.14                                                                       | 1                                                                                                                                                                                       | 1.00                                                                                    |
| FZD6                                | 0.30                                                                       | 1                                                                                                                                                                                       | 1.00                                                                                    |
| NDRG1                               | 0.78                                                                       | 2                                                                                                                                                                                       | 0.99                                                                                    |
| IGF2BP2                             | 1.13                                                                       | 2                                                                                                                                                                                       | 0.98                                                                                    |
| WWP1                                | -0.56                                                                      | 1                                                                                                                                                                                       | 1.00                                                                                    |

| Information on the driver network |             |                                                    |                                                                               |
|-----------------------------------|-------------|----------------------------------------------------|-------------------------------------------------------------------------------|
| Source gene                       | Target gene | Source of interaction (HPRD = 1, KEGG = 2, TF = 3) | Differential expression correlation between genes in TNBC and non-TNBC groups |
| ANXA1                             | EGFR        | 1                                                  | -0.69                                                                         |
| ARNT                              | CP          | 3                                                  | 0.47                                                                          |
| COL9A3                            | EGFR        | 1                                                  | 0.48                                                                          |
| EGFR                              | GPM6B       | 1                                                  | -0.08                                                                         |
| EGFR                              | ICAM1       | 1                                                  | -0.10                                                                         |
| EGFR                              | KRT17       | 1                                                  | 0.02                                                                          |
| EGFR                              | MET         | 1                                                  | 0.08                                                                          |
| EGFR                              | PIK3CG      | 2                                                  | -0.03                                                                         |
| EGFR                              | S100A7      | 1                                                  | -0.85                                                                         |
| ICAM1                             | MSN         | 1                                                  | 0.03                                                                          |
| EIF3E                             | NDRG1       | 1                                                  | 0.38                                                                          |
| MET                               | PIK3CG      | 2                                                  | -0.02                                                                         |
| PLEC                              | EGFR        | 1                                                  | -0.44                                                                         |
| PLEC                              | MSN         | 1                                                  | 0.19                                                                          |
| PTK2                              | EGFR        | 1                                                  | -0.33                                                                         |
| PTK2                              | IGHM        | 1                                                  | -0.09                                                                         |
| PTK2                              | PIK3CG      | 2                                                  | 0.45                                                                          |
| YWHAZ                             | EGFR        | 1                                                  | -0.24                                                                         |
| YWHAZ                             | EPB41L2     | 1                                                  | 0.70                                                                          |
| YWHAZ                             | WWTR1       | 1                                                  | -0.05                                                                         |
| FZD6                              | SFRP1       | 1                                                  | 0.55                                                                          |
| NDRG1                             | PABPC1      | 1                                                  | 0.24                                                                          |
| WWP1                              | EGFR        | 2                                                  | -0.22                                                                         |

|        |      |   |      |
|--------|------|---|------|
| PUF60  | 0.16 | 1 | 0.99 |
| WWTR1  | 1.12 | 2 | 1.00 |
| PABPC1 | 0.14 | 1 | 0.99 |

|       |         |   |       |
|-------|---------|---|-------|
| WWP1  | MET     | 2 | -0.88 |
| PUF60 | IGF2BP2 | 1 | 0.13  |
| PUF60 | PABPC1  | 1 | -0.02 |

### Neve et al. ER+

| Information on driver network genes |                                                                      |                                                                                                                                                                                         |                                                                                         |
|-------------------------------------|----------------------------------------------------------------------|-----------------------------------------------------------------------------------------------------------------------------------------------------------------------------------------|-----------------------------------------------------------------------------------------|
| Gene Name                           | Median expression in ER+ group - Median gene expression in ER- group | Amplification and expression status (Amplified = 1, Differentially expressed = 2, Both amplified and differentially expressed = 12, Neither amplified nor differentially expressed = 0) | Frequency of appearance in the network from resampling (min = 0, max = 1, cutoff = 0.5) |
| KLF5                                | -0.44114                                                             | 0                                                                                                                                                                                       | 1.00                                                                                    |
| CDH1                                | 1.233511                                                             | 2                                                                                                                                                                                       | 1.00                                                                                    |
| CTSD                                | 0.673943                                                             | 2                                                                                                                                                                                       | 0.80                                                                                    |
| CTTN                                | 0.412132                                                             | 12                                                                                                                                                                                      | 1.00                                                                                    |
| ERBB3                               | 0.841504                                                             | 2                                                                                                                                                                                       | 0.76                                                                                    |
| ESR1                                | 1.262475                                                             | 2                                                                                                                                                                                       | 1.00                                                                                    |
| FOXO1                               | -0.127276                                                            | 0                                                                                                                                                                                       | 1.00                                                                                    |
| GNAI1                               | -0.290558                                                            | 0                                                                                                                                                                                       | 1.00                                                                                    |
| FOXA1                               | 1.202347                                                             | 2                                                                                                                                                                                       | 1.00                                                                                    |
| ID2                                 | 0.94878                                                              | 2                                                                                                                                                                                       | 0.65                                                                                    |
| IGFBP4                              | 0.798117                                                             | 2                                                                                                                                                                                       | 0.56                                                                                    |
| MUC1                                | 1.255907                                                             | 2                                                                                                                                                                                       | 1.00                                                                                    |
| MYB                                 | 0.661227                                                             | 2                                                                                                                                                                                       | 0.78                                                                                    |
| NACA                                | 0.283102                                                             | 2                                                                                                                                                                                       | 0.52                                                                                    |
| PAK1                                | -0.068565                                                            | 1                                                                                                                                                                                       | 1.00                                                                                    |
| PIK3R1                              | 0.113519                                                             | 0                                                                                                                                                                                       | 1.00                                                                                    |
| PPP1CA                              | 0.427083                                                             | 1                                                                                                                                                                                       | 1.00                                                                                    |
| PSMC5                               | 0.271763                                                             | 1                                                                                                                                                                                       | 1.00                                                                                    |
| TFF1                                | 3.94927                                                              | 2                                                                                                                                                                                       | 1.00                                                                                    |
| XBP1                                | 1.436549                                                             | 2                                                                                                                                                                                       | 1.00                                                                                    |
| FADD                                | 0.385548                                                             | 1                                                                                                                                                                                       | 0.64                                                                                    |
| ARHGEF7                             | 0.181931                                                             | 0                                                                                                                                                                                       | 1.00                                                                                    |
| ASH2L                               | 0.532299                                                             | 12                                                                                                                                                                                      | 0.98                                                                                    |

| Information on the driver network |             |                                                    |                                                                         |
|-----------------------------------|-------------|----------------------------------------------------|-------------------------------------------------------------------------|
| Source gene                       | Target gene | Source of interaction (HPRD = 1, KEGG = 2, TF = 3) | Differential expression correlation between genes in ER+ and ER- groups |
| CDH1                              | PPP1CA      | 1                                                  | -0.87                                                                   |
| CTSD                              | IGFBP4      | 1                                                  | 0.55                                                                    |
| CTTN                              | ARPC3       | 1                                                  | 0.32                                                                    |
| CTTN                              | SHANK2      | 1                                                  | 0.13                                                                    |
| ERBB3                             | MUC1        | 1                                                  | 0.08                                                                    |
| ERBB3                             | PIK3R1      | 2                                                  | 0.51                                                                    |
| ESR1                              | KLF5        | 1                                                  | 1.26                                                                    |
| ESR1                              | CTSD        | 3                                                  | 0.12                                                                    |
| ESR1                              | FOXO1       | 1                                                  | 1.37                                                                    |
| ESR1                              | GNAI1       | 1                                                  | 1.41                                                                    |
| ESR1                              | MUC1        | 3                                                  | -0.77                                                                   |
| ESR1                              | PAK1        | 1                                                  | 1.12                                                                    |
| ESR1                              | PIK3R1      | 1                                                  | 1.27                                                                    |
| ESR1                              | PSMC5       | 1                                                  | -0.98                                                                   |
| ESR1                              | TFF1        | 3                                                  | -0.55                                                                   |
| ESR1                              | XBP1        | 1                                                  | -1.08                                                                   |
| ESR1                              | SLC9A3R1    | 3                                                  | -1.02                                                                   |
| ESR1                              | MED13       | 1                                                  | -0.98                                                                   |
| FOXA1                             | TFF1        | 3                                                  | -0.51                                                                   |
| FOXA1                             | XBP1        | 1                                                  | -0.62                                                                   |
| ID2                               | PPP1CA      | 1                                                  | -0.15                                                                   |
| MUC1                              | ESR1        | 1                                                  | -0.77                                                                   |
| MYB                               | ASH2L       | 1                                                  | 0.47                                                                    |



|          |          |    |      |
|----------|----------|----|------|
| SLC9A3R1 | 1.06108  | 2  | 1.00 |
| MED13    | 0.564292 | 12 | 1.00 |
| TOM1L1   | 0.541347 | 2  | 0.55 |
| ARPC3    | 0.360683 | 2  | 0.74 |
| LPHN1    | 0.049523 | 0  | 1.00 |
| SHANK2   | 0.7572   | 2  | 1.00 |
| MED13L   | 0.483418 | 2  | 0.93 |
| CCDC47   | 0.481158 | 1  | 0.63 |

|        |         |   |       |
|--------|---------|---|-------|
| NACA   | FADD    | 1 | -0.83 |
| PIK3R1 | TOM1L1  | 1 | -0.75 |
| TFF1   | ESR1    | 1 | -0.55 |
| TFF1   | FOXA1   | 1 | -0.51 |
| MED13  | MED13L  | 1 | -0.09 |
| TOM1L1 | CCDC47  | 1 | 0.05  |
| SHANK2 | ARHGEF7 | 1 | 1.25  |
| SHANK2 | LPHN1   | 1 | 1.25  |

Neve et al. HER2+

| Information on driver network genes |                                                                          |                                                                                                                                                                                         |                                                                                         |
|-------------------------------------|--------------------------------------------------------------------------|-----------------------------------------------------------------------------------------------------------------------------------------------------------------------------------------|-----------------------------------------------------------------------------------------|
| Gene Name                           | Median expression in HER2+ group - Median gene expression in HER2- group | Amplification and expression status (Amplified = 1, Differentially expressed = 2, Both amplified and differentially expressed = 12, Neither amplified nor differentially expressed = 0) | Frequency of appearance in the network from resampling (min = 0, max = 1, cutoff = 0.5) |
| ALDH2                               | 1.73                                                                     | 2                                                                                                                                                                                       | 1.00                                                                                    |
| CDH1                                | 1.29                                                                     | 2                                                                                                                                                                                       | 0.87                                                                                    |
| CHGB                                | 0.19                                                                     | 2                                                                                                                                                                                       | 0.54                                                                                    |
| CLN3                                | 0.79                                                                     | 2                                                                                                                                                                                       | 1.00                                                                                    |
| CTSD                                | 0.77                                                                     | 2                                                                                                                                                                                       | 0.60                                                                                    |
| ERBB2                               | 2.31                                                                     | 12                                                                                                                                                                                      | 1.00                                                                                    |
| ERBB3                               | 0.80                                                                     | 2                                                                                                                                                                                       | 0.52                                                                                    |
| GRB7                                | 1.56                                                                     | 12                                                                                                                                                                                      | 1.00                                                                                    |
| FOXA1                               | 1.03                                                                     | 2                                                                                                                                                                                       | 0.90                                                                                    |
| MUC1                                | 1.01                                                                     | 2                                                                                                                                                                                       | 0.64                                                                                    |
| PHB                                 | 0.49                                                                     | 1                                                                                                                                                                                       | 1.00                                                                                    |
| MED1                                | 0.67                                                                     | 12                                                                                                                                                                                      | 1.00                                                                                    |
| PRKCD                               | 0.58                                                                     | 2                                                                                                                                                                                       | 0.58                                                                                    |
| PTPRF                               | 0.58                                                                     | 2                                                                                                                                                                                       | 0.69                                                                                    |
| RARA                                | 0.49                                                                     | 12                                                                                                                                                                                      | 0.99                                                                                    |
| RPN2                                | 0.72                                                                     | 2                                                                                                                                                                                       | 0.73                                                                                    |
| S100A8                              | 1.11                                                                     | 2                                                                                                                                                                                       | 0.97                                                                                    |
| S100A9                              | 1.28                                                                     | 2                                                                                                                                                                                       | 0.99                                                                                    |
| SAT1                                | 0.84                                                                     | 2                                                                                                                                                                                       | 0.57                                                                                    |
| TFF1                                | 1.60                                                                     | 2                                                                                                                                                                                       | 1.00                                                                                    |
| XBP1                                | 1.15                                                                     | 2                                                                                                                                                                                       | 0.92                                                                                    |
| PCGF2                               | 0.25                                                                     | 1                                                                                                                                                                                       | 0.99                                                                                    |
| UNC119                              | 0.18                                                                     | 1                                                                                                                                                                                       | 1.00                                                                                    |

| Information on the driver network |             |                                                    |                                                                             |
|-----------------------------------|-------------|----------------------------------------------------|-----------------------------------------------------------------------------|
| Source gene                       | Target gene | Source of interaction (HPRD = 1, KEGG = 2, TF = 3) | Differential expression correlation between genes in HER2+ and HER2- groups |
| ALDH2                             | UNC119      | 1                                                  | -0.50                                                                       |
| CDH1                              | PTPRF       | 1                                                  | -1.02                                                                       |
| CDH1                              | NDRG1       | 1                                                  | -0.05                                                                       |
| CHGB                              | S100A8      | 1                                                  | 0.17                                                                        |
| CLN3                              | PHB         | 1                                                  | 0.80                                                                        |
| CLN3                              | RPN2        | 1                                                  | 0.33                                                                        |
| CTSD                              | MED1        | 1                                                  | 0.51                                                                        |
| ERBB2                             | ERBB3       | 1                                                  | -0.50                                                                       |
| ERBB2                             | GRB7        | 1                                                  | -0.11                                                                       |
| ERBB2                             | MUC1        | 1                                                  | -0.26                                                                       |
| ERBB2                             | TOB1        | 1                                                  | -0.98                                                                       |
| ERBB3                             | GRB7        | 1                                                  | -0.94                                                                       |
| ERBB3                             | MUC1        | 1                                                  | -0.36                                                                       |
| FOXA1                             | TFF1        | 3                                                  | -0.40                                                                       |
| FOXA1                             | XBP1        | 1                                                  | -0.19                                                                       |
| MUC1                              | PRKCD       | 1                                                  | 0.06                                                                        |
| MED1                              | RARA        | 1                                                  | 0.19                                                                        |
| MED1                              | TFF1        | 1                                                  | 0.33                                                                        |
| MED1                              | MED24       | 1                                                  | 0.30                                                                        |
| MED1                              | MED9        | 1                                                  | 0.15                                                                        |
| RPN2                              | NDRG1       | 1                                                  | 0.15                                                                        |
| S100A8                            | S100A9      | 1                                                  | 0.07                                                                        |
| S100A8                            | UNC119      | 1                                                  | 0.63                                                                        |

|       |      |   |      |
|-------|------|---|------|
| MED24 | 0.14 | 2 | 0.63 |
| TOB1  | 0.71 | 2 | 0.69 |
| NDRG1 | 1.16 | 2 | 0.86 |
| SPDEF | 1.65 | 2 | 0.99 |
| MED9  | 0.17 | 2 | 0.98 |

|       |        |   |       |
|-------|--------|---|-------|
| SAT1  | UNC119 | 1 | 0.05  |
| TFF1  | FOXA1  | 1 | -0.40 |
| PCGF2 | SPDEF  | 1 | -0.22 |
| MED24 | MED9   | 1 | 0.26  |

Neve et al. TN

| Information on driver network genes |                                                                            |                                                                                                                                                                                         |                                                                                         |
|-------------------------------------|----------------------------------------------------------------------------|-----------------------------------------------------------------------------------------------------------------------------------------------------------------------------------------|-----------------------------------------------------------------------------------------|
| Gene Name                           | Median expression in TNBC group - Median gene expression in non-TNBC group | Amplification and expression status (Amplified = 1, Differentially expressed = 2, Both amplified and differentially expressed = 12, Neither amplified nor differentially expressed = 0) | Frequency of appearance in the network from resampling (min = 0, max = 1, cutoff = 0.5) |
| ANXA1                               | 2.77                                                                       | 2                                                                                                                                                                                       | 0.64                                                                                    |
| CAV1                                | 2.84                                                                       | 2                                                                                                                                                                                       | 0.64                                                                                    |
| CAV2                                | 2.28                                                                       | 2                                                                                                                                                                                       | 0.64                                                                                    |
| CD44                                | 1.64                                                                       | 2                                                                                                                                                                                       | 0.64                                                                                    |
| COL6A2                              | 0.16                                                                       | 0                                                                                                                                                                                       | 0.64                                                                                    |
| CTSK                                | -0.11                                                                      | 1                                                                                                                                                                                       | 0.62                                                                                    |
| EGFR                                | 1.40                                                                       | 2                                                                                                                                                                                       | 0.64                                                                                    |
| EPHA2                               | 0.90                                                                       | 2                                                                                                                                                                                       | 0.62                                                                                    |
| EPS15                               | -0.05                                                                      | 0                                                                                                                                                                                       | 0.64                                                                                    |
| ESR1                                | -1.10                                                                      | 0                                                                                                                                                                                       | 0.64                                                                                    |
| FGFR1                               | -0.13                                                                      | 1                                                                                                                                                                                       | 0.98                                                                                    |
| FN1                                 | 1.47                                                                       | 2                                                                                                                                                                                       | 0.64                                                                                    |
| GTF2F2                              | 0.25                                                                       | 2                                                                                                                                                                                       | 0.99                                                                                    |
| TNC                                 | 0.82                                                                       | 2                                                                                                                                                                                       | 0.53                                                                                    |
| IGFBP3                              | 1.15                                                                       | 2                                                                                                                                                                                       | 0.64                                                                                    |
| LYN                                 | 0.87                                                                       | 2                                                                                                                                                                                       | 0.61                                                                                    |
| MET                                 | 1.14                                                                       | 2                                                                                                                                                                                       | 0.64                                                                                    |
| MSN                                 | 2.68                                                                       | 2                                                                                                                                                                                       | 0.64                                                                                    |
| PAK2                                | -0.20                                                                      | 0                                                                                                                                                                                       | 0.61                                                                                    |
| PRNP                                | 1.18                                                                       | 2                                                                                                                                                                                       | 0.64                                                                                    |
| SOS2                                | -0.09                                                                      | 0                                                                                                                                                                                       | 0.64                                                                                    |
| SPARC                               | 1.31                                                                       | 2                                                                                                                                                                                       | 0.62                                                                                    |
| TGFB1                               | 0.94                                                                       | 2                                                                                                                                                                                       | 0.64                                                                                    |

| Information on the driver network |             |                                                    |                                                                               |
|-----------------------------------|-------------|----------------------------------------------------|-------------------------------------------------------------------------------|
| Source gene                       | Target gene | Source of interaction (HPRD = 1, KEGG = 2, TF = 3) | Differential expression correlation between genes in TNBC and non-TNBC groups |
| ANXA1                             | EGFR        | 1                                                  | -0.50                                                                         |
| CAV1                              | CAV2        | 1                                                  | 0.10                                                                          |
| CAV1                              | EGFR        | 1                                                  | -0.87                                                                         |
| CAV1                              | IGFBP3      | 1                                                  | -0.85                                                                         |
| CAV1                              | PRNP        | 1                                                  | 0.06                                                                          |
| CAV2                              | EGFR        | 1                                                  | -0.28                                                                         |
| CD44                              | EGFR        | 1                                                  | -0.15                                                                         |
| CD44                              | FN1         | 1                                                  | 0.47                                                                          |
| CD44                              | IGFBP3      | 1                                                  | -0.45                                                                         |
| CD44                              | MSN         | 1                                                  | -0.14                                                                         |
| CD44                              | TGFBR2      | 1                                                  | -0.16                                                                         |
| CTSK                              | SPARC       | 1                                                  | -0.15                                                                         |
| EGFR                              | EPHA2       | 1                                                  | -0.39                                                                         |
| EGFR                              | EPS15       | 1                                                  | 1.19                                                                          |
| EGFR                              | ESR1        | 1                                                  | 1.38                                                                          |
| EGFR                              | FN1         | 1                                                  | -1.14                                                                         |
| EGFR                              | TNC         | 1                                                  | -0.07                                                                         |
| EGFR                              | LYN         | 1                                                  | -1.03                                                                         |
| EGFR                              | MET         | 1                                                  | -0.29                                                                         |
| EGFR                              | SOS2        | 2                                                  | 1.48                                                                          |
| EGFR                              | UROD        | 1                                                  | 0.03                                                                          |
| EGFR                              | TUBA1A      | 1                                                  | -1.46                                                                         |
| FGFR1                             | NRP1        | 1                                                  | 1.28                                                                          |

|         |      |   |      |
|---------|------|---|------|
| TGFB1   | 1.55 | 2 | 0.64 |
| TGFBR2  | 1.13 | 2 | 0.64 |
| UROD    | 0.51 | 2 | 0.63 |
| TUBA1A  | 1.49 | 2 | 0.55 |
| C19orf2 | 0.18 | 1 | 0.99 |
| NRP1    | 0.91 | 2 | 0.96 |
| TRIP10  | 0.37 | 2 | 0.61 |
| TUBB6   | 1.55 | 2 | 0.56 |

|        |         |   |       |
|--------|---------|---|-------|
| FN1    | COL6A2  | 1 | 1.20  |
| FN1    | TNC     | 1 | 0.07  |
| FN1    | IGFBP3  | 1 | -0.56 |
| FN1    | SPARC   | 1 | 0.58  |
| FN1    | TGFB1   | 1 | 0.07  |
| GTF2F2 | C19orf2 | 1 | -0.49 |
| LYN    | PAK2    | 1 | 1.25  |
| LYN    | TRIP10  | 1 | -0.21 |
| SPARC  | TGFB1   | 1 | 0.44  |
| TGFB1  | TGFBR2  | 2 | 0.96  |
| TUBA1A | TUBB6   | 2 | 0.12  |
