# Supplementary material for: A network-based, integrative study to identify core biological pathways that drive breast cancer clinical subtypes
Source: PubMed Central journal article supplement (PMC3304402; doi:10.1038/bjc.2011.584), 2012-02-16
Supplement: bjc2011584x7.pdf [file bjc2011584x7.pdf]

**siRNA screen data for 10 "differential expression member" genes**

| Gene name | Entrez.Gene.Id | BT20  | BT20  | BT20  | BT549 | BT549 | BT549 | HBL100 | HBL100 | HBL100 |
|-----------|----------------|-------|-------|-------|-------|-------|-------|--------|--------|--------|
|           |                | TNBC  | TNBC  | TNBC  | TNBC  | TNBC  | TNBC  | TNBC   | TNBC   | TNBC   |
| B3GNT9    | 84752          | -0.01 | 0.02  | 0.56  | -2.60 | -0.41 | -0.18 | 0.04   | 0.11   | 1.71   |
| B3GNT9    | 84752          | -0.23 | -1.28 | 1.88  | 0.28  | -1.58 | 0.52  | -1.00  | -0.79  | -1.41  |
| B3GNT9    | 84752          | 0.90  | -1.13 | -1.23 | -0.23 | 0.15  | 0.13  | 3.05   | 3.46   | 4.08   |
| B3GNT9    | 84752          | 0.10  | -0.39 | -0.25 | 1.21  | 0.87  | 0.54  | 0.25   | 2.45   | 1.91   |
| BTG3      | 10950          | -0.18 | 1.41  | 1.23  | 2.56  | 0.53  | 1.13  | 0.22   | -1.00  | 0.57   |
| BTG3      | 10950          | -0.56 | -0.15 | -0.70 | -2.24 | -2.57 | -2.13 | -4.51  | -4.22  | -3.87  |
| BTG3      | 10950          | 0.29  | 0.67  | -0.67 | 1.09  | -0.32 | 0.81  | 0.25   | 2.21   | 1.32   |
| BTG3      | 10950          | 1.09  | 1.65  | -0.10 | 1.00  | 0.02  | 0.79  | -0.20  | -0.62  | -0.51  |
| CHST3     | 9469           | -0.72 | -0.34 | 0.15  | -0.67 | -0.13 | 0.20  | 0.12   | 5.23   | 0.19   |
| CHST3     | 9469           | -1.90 | 0.33  | -2.24 | -0.95 | -0.34 | -1.20 | -1.74  | -2.60  | -2.06  |
| CHST3     | 9469           | 1.23  | 0.66  | 1.12  | 0.87  | 1.24  | 1.16  | -0.59  | -0.36  | 0.21   |
| CHST3     | 9469           | 0.38  | 1.13  | 0.40  | -0.44 | -0.47 | 1.74  | -0.17  | -0.60  | -0.57  |
| CSRP2     | 1466           | 0.97  | 4.14  | 1.16  | 0.70  | 1.21  | 2.18  | 3.83   | 6.37   | 3.44   |
| CSRP2     | 1466           | -0.24 | 0.14  | -0.94 | -2.16 | -0.44 | -0.67 | -1.23  | -2.01  | -2.53  |
| CSRP2     | 1466           | 1.70  | 0.83  | -0.03 | 0.43  | 1.22  | -0.80 | 1.18   | 0.81   | 0.37   |
| CSRP2     | 1466           | 0.65  | -0.43 | 0.41  | -0.19 | 0.40  | 1.42  | -0.15  | -0.69  | -0.27  |
| GSTP1     | 2950           | -2.23 | -1.24 | -0.18 | -0.64 | -0.54 | -2.40 | -0.22  | -1.35  | 0.13   |
| GSTP1     | 2950           | 0.08  | -1.44 | -1.31 | -0.58 | -1.00 | -0.07 | 0.54   | -0.80  | -1.45  |
| GSTP1     | 2950           | 0.22  | -0.70 | -0.86 | -0.26 | -0.55 | -0.37 | -0.59  | -0.44  | -1.72  |
| GSTP1     | 2950           | -0.62 | -0.90 | 0.56  | -0.62 | -0.35 | 0.58  | 0.42   | -0.03  | -0.05  |
| ID4       | 3400           | 0.25  | 0.08  | -0.24 | -0.05 | -0.52 | -0.11 | 0.83   | 0.09   | 0.08   |
| ID4       | 3400           | -0.28 | -1.64 | -2.59 | -1.23 | -0.91 | 0.38  | -1.88  | -1.49  | -2.35  |
| ID4       | 3400           | 0.42  | 0.11  | 0.58  | 0.30  | 1.02  | 0.16  | -0.19  | -0.28  | 1.40   |
| ID4       | 3400           | -2.01 | -3.65 | -0.45 | 0.08  | -0.07 | -0.47 | 3.69   | 3.30   | 2.96   |
| MCAM      | 4162           | -0.38 | 0.46  | -0.32 | 1.11  | 0.06  | 0.48  | 3.93   | 1.57   | 1.22   |
| MCAM      | 4162           | -0.76 | -1.16 | 1.88  | -1.90 | 0.06  | -0.45 | 1.96   | 1.87   | 0.77   |
| MCAM      | 4162           | -0.16 | -0.41 | -0.50 | -2.24 | -0.62 | -0.62 | -0.65  | -2.00  | -1.62  |
| MCAM      | 4162           | -1.18 | -0.39 | 0.61  | -0.60 | -0.60 | -1.75 | -3.62  | -3.50  | -2.64  |
| PSAT1     | 29968          | 0.03  | 1.42  | 0.30  | -0.19 | 0.31  | -0.16 | -0.28  | 0.78   | 1.25   |
| PSAT1     | 29968          | -1.97 | -1.47 | -1.56 | -1.57 | -0.66 | -1.16 | -1.24  | -0.66  | -0.34  |
| PSAT1     | 29968          | -0.77 | -0.41 | 0.55  | -0.93 | 1.45  | 0.69  | 1.06   | 1.46   | 4.91   |

|        |       |       |       |       |       |       |       |       |       |       |
|--------|-------|-------|-------|-------|-------|-------|-------|-------|-------|-------|
| PSAT1  | 29968 | 1.55  | 0.01  | 0.55  | 1.42  | -0.10 | 0.24  | 2.62  | 1.19  | 0.58  |
| TM4SF1 | 4071  | 1.13  | 0.90  | 1.60  | 0.29  | -0.73 | -1.96 | -0.28 | -1.05 | -0.96 |
| TM4SF1 | 4071  | 0.10  | 1.26  | 1.18  | 0.66  | -0.30 | -0.13 | -0.55 | -0.34 | -0.35 |
| TM4SF1 | 4071  | 0.45  | 0.08  | 1.04  | -0.57 | -0.95 | -0.29 | -0.64 | -1.43 | -1.47 |
| TM4SF1 | 4071  | -0.74 | 0.47  | -0.47 | 0.41  | 0.17  | 0.01  | -0.34 | -0.18 | 0.25  |
| ZIC1   | 7545  | 0.67  | 0.52  | 0.43  | -0.37 | -0.21 | -1.79 | 4.03  | 6.14  | 1.23  |
| ZIC1   | 7545  | -2.25 | -1.56 | -0.88 | 2.24  | 1.13  | 1.19  | 0.03  | 0.13  | -0.05 |
| ZIC1   | 7545  | -0.43 | -0.14 | 0.06  | 1.88  | 0.46  | 1.87  | 1.06  | 0.92  | 1.17  |
| ZIC1   | 7545  | -0.71 | -0.05 | -0.10 | -1.56 | -1.84 | -1.16 | -3.31 | -4.51 | -4.58 |

**siRNA screen data for 10 "differential expression member" genes**

| Gene name | Entrez.Gene.Id | HS578T | HS578T | HS578T | MDAMB157 | MDAMB157 | MDAMB157 | MDAMB231 | MDAMB231 | MDAMB231 |
|-----------|----------------|--------|--------|--------|----------|----------|----------|----------|----------|----------|
|           |                | TNBC   | TNBC   | TNBC   | TNBC     | TNBC     | TNBC     | TNBC     | TNBC     | TNBC     |
| B3GNT9    | 84752          | 1.40   | 3.38   | 2.59   | 3.24     | 3.93     | 2.90     | -0.29    | -0.28    | 0.21     |
| B3GNT9    | 84752          | 2.25   | 1.01   | 2.47   | -0.11    | -0.23    | 0.40     | -0.28    | 0.64     | -0.54    |
| B3GNT9    | 84752          | 0.69   | 0.90   | -0.20  | 0.09     | -0.06    | 2.82     | 0.19     | -1.05    | -0.29    |
| B3GNT9    | 84752          | -0.58  | 0.49   | 0.71   | -0.30    | 0.13     | 0.30     | -0.68    | -0.61    | 0.16     |
| BTG3      | 10950          | 1.43   | 1.00   | 2.28   | 2.45     | 2.77     | 2.73     | 0.27     | 0.30     | 0.23     |
| BTG3      | 10950          | -1.67  | -2.60  | -1.97  | -2.49    | -3.68    | -3.20    | 0.01     | -0.79    | -5.04    |
| BTG3      | 10950          | 2.72   | 3.22   | 1.81   | 1.41     | 1.67     | 4.60     | 0.16     | -0.27    | -0.48    |
| BTG3      | 10950          | 0.36   | 0.32   | 1.15   | 0.62     | 0.94     | 0.67     | -1.38    | -0.75    | -0.57    |
| CHST3     | 9469           | -1.11  | -0.20  | -0.18  | -1.98    | -1.83    | -1.96    | 1.65     | 0.15     | 1.26     |
| CHST3     | 9469           | -0.69  | -0.68  | -0.42  | -1.38    | -1.64    | -2.10    | -0.39    | -0.99    | -0.79    |
| CHST3     | 9469           | -0.02  | 0.64   | 0.55   | 0.90     | 0.54     | 2.98     | 0.83     | 0.48     | -0.17    |
| CHST3     | 9469           | -0.09  | -0.27  | -0.55  | -2.09    | -0.32    | 1.35     | 0.15     | -0.40    | 0.37     |
| CSRP2     | 1466           | 0.93   | 1.07   | 0.31   | 5.06     | 3.55     | 3.03     | 0.73     | 0.13     | 0.50     |
| CSRP2     | 1466           | -1.23  | -0.88  | -0.63  | -4.68    | -5.67    | -5.56    | -1.32    | -1.83    | -0.95    |
| CSRP2     | 1466           | 0.56   | -0.16  | 0.73   | 5.01     | 3.49     | 1.36     | 0.88     | 1.41     | 1.09     |
| CSRP2     | 1466           | -0.49  | -0.09  | 0.49   | 0.97     | 2.48     | 1.15     | 0.12     | -0.92    | 1.78     |
| GSTP1     | 2950           | 0.60   | 1.22   | 0.51   | -2.13    | -3.10    | -3.21    | 0.40     | 0.14     | -0.81    |
| GSTP1     | 2950           | -0.21  | -0.58  | 1.61   | -0.28    | 0.35     | 0.15     | 0.11     | -0.13    | 0.05     |
| GSTP1     | 2950           | 1.11   | 0.44   | 0.99   | 0.71     | 0.45     | 0.65     | 0.42     | -2.51    | -0.03    |
| GSTP1     | 2950           | 0.48   | 0.20   | -0.17  | 0.81     | 2.18     | 1.15     | -0.74    | -3.05    | -0.53    |
| ID4       | 3400           | 0.50   | 0.60   | 0.29   | 3.16     | 1.22     | 2.57     | -0.69    | -1.07    | -0.15    |
| ID4       | 3400           | -0.85  | -0.65  | -0.39  | 0.18     | 0.63     | 0.37     | -1.32    | -1.10    | -2.75    |
| ID4       | 3400           | -0.70  | -0.08  | -1.21  | -1.59    | -1.83    | -2.12    | 0.18     | -0.13    | 0.70     |
| ID4       | 3400           | -0.41  | 0.19   | 0.06   | -3.34    | -3.51    | -2.55    | -0.06    | -0.85    | -0.50    |
| MCAM      | 4162           | -0.46  | -1.28  | -0.25  | -1.45    | -3.08    | -2.35    | -0.43    | -1.08    | -0.72    |
| MCAM      | 4162           | -0.43  | 0.22   | 0.14   | 1.07     | 1.37     | 0.66     | -0.22    | -1.36    | -0.56    |
| MCAM      | 4162           | -2.24  | -3.33  | -2.24  | -0.45    | -0.14    | -0.07    | -0.03    | -0.19    | -0.51    |
| MCAM      | 4162           | 0.22   | -0.80  | -0.64  | -2.85    | -1.96    | -2.58    | -1.99    | -2.44    | 0.28     |
| PSAT1     | 29968          | -0.21  | 1.18   | 0.01   | 0.67     | 0.11     | 0.07     | 1.24     | 0.92     | -0.40    |
| PSAT1     | 29968          | -0.46  | -0.10  | 0.25   | -1.95    | -1.69    | -1.70    | -1.21    | -1.29    | -1.23    |
| PSAT1     | 29968          | 0.15   | 1.53   | 0.61   | 0.65     | -0.04    | 0.58     | 1.56     | -0.12    | 0.68     |

|        |       |       |       |       |       |       |       |       |       |       |
|--------|-------|-------|-------|-------|-------|-------|-------|-------|-------|-------|
| PSAT1  | 29968 | 0.25  | 0.15  | -0.19 | 0.91  | 0.63  | 0.84  | 0.26  | 0.00  | -0.49 |
| TM4SF1 | 4071  | -0.43 | -0.35 | -0.39 | 2.03  | 1.93  | 2.24  | -0.81 | -0.28 | -0.48 |
| TM4SF1 | 4071  | -0.18 | 0.04  | 0.59  | 0.31  | 0.55  | 1.64  | 0.14  | 0.35  | -0.16 |
| TM4SF1 | 4071  | -0.81 | -1.26 | -1.08 | -5.50 | -8.01 | -4.11 | -0.62 | -1.26 | -0.61 |
| TM4SF1 | 4071  | 0.08  | -0.25 | -1.17 | -0.70 | -0.85 | -0.61 | -0.15 | -0.42 | -1.25 |
| ZIC1   | 7545  | -0.27 | 0.51  | 0.00  | 1.30  | -0.04 | 0.00  | 0.30  | -0.68 | 0.30  |
| ZIC1   | 7545  | 0.62  | -0.39 | -1.27 | -1.09 | -2.09 | -0.39 | -0.68 | 1.24  | -0.90 |
| ZIC1   | 7545  | 0.94  | -0.41 | 2.94  | 0.93  | 0.20  | 0.29  | -0.24 | -0.89 | 0.04  |
| ZIC1   | 7545  | -0.98 | -2.82 | -1.34 | -2.87 | -4.67 | -2.12 | 0.04  | -1.28 | -0.61 |

**siRNA screen data for 10 "differential expression member" genes**

| Gene name | Entrez.Gene.Id | MDAMB436 | MDAMB436 | MDAMB436 | MDAMB453 | MDAMB453 | MDAMB453 | MDAMB468 | MDAMB468 | MDAMB468 |
|-----------|----------------|----------|----------|----------|----------|----------|----------|----------|----------|----------|
|           |                | TNBC     | TNBC     | TNBC     | TNBC     | TNBC     | TNBC     | TNBC     | TNBC     | TNBC     |
| B3GNT9    | 84752          | -0.89    | 2.30     | -1.65    | -0.99    | -0.53    | -1.42    | 1.47     | 2.40     | 2.51     |
| B3GNT9    | 84752          | 1.03     | 1.53     | 0.78     | -0.81    | -0.20    | -0.48    | -0.32    | -2.89    | 0.04     |
| B3GNT9    | 84752          | 0.16     | -0.74    | 0.35     | -1.33    | -0.44    | 0.04     | -4.15    | -4.22    | -4.75    |
| B3GNT9    | 84752          | 1.34     | -0.06    | 0.09     | -1.33    | 1.47     | 0.55     | 0.44     | -0.71    | -0.83    |
| BTG3      | 10950          | 0.82     | 1.57     | 1.03     | -0.02    | 0.67     | 1.15     | 0.14     | 0.16     | -0.50    |
| BTG3      | 10950          | 0.87     | -0.36    | -1.94    | -1.07    | 0.81     | -0.12    | -8.61    | -11.99   | -6.43    |
| BTG3      | 10950          | 0.36     | -0.64    | -0.43    | -1.82    | -0.54    | 0.99     | 0.33     | 0.06     | 0.59     |
| BTG3      | 10950          | -0.95    | 1.19     | 0.10     | -1.39    | 1.23     | -0.88    | 0.36     | -2.40    | -1.59    |
| CHST3     | 9469           | -0.78    | -2.63    | -4.56    | -0.71    | 0.41     | -1.00    | -0.83    | -0.80    | -0.74    |
| CHST3     | 9469           | -1.47    | 0.78     | 0.00     | -1.64    | -1.71    | -2.38    | -0.57    | 0.51     | -0.51    |
| CHST3     | 9469           | -0.09    | 0.78     | 1.19     | 1.10     | 0.76     | 0.71     | -0.18    | -0.36    | -0.26    |
| CHST3     | 9469           | -1.07    | 0.29     | -0.63    | -1.69    | -1.15    | -0.56    | 0.80     | -0.78    | -0.04    |
| CSRP2     | 1466           | 0.60     | 1.19     | -0.12    | 0.50     | 1.44     | -0.03    | 1.04     | 0.63     | 1.11     |
| CSRP2     | 1466           | -0.23    | -2.01    | -1.93    | 0.08     | -0.62    | 1.67     | -3.62    | -3.54    | -6.67    |
| CSRP2     | 1466           | 0.04     | 2.07     | 0.47     | 2.12     | 0.29     | 0.40     | -0.21    | 0.25     | 0.46     |
| CSRP2     | 1466           | -0.49    | 1.38     | -2.22    | -0.83    | 2.53     | 0.49     | -0.11    | -0.11    | 0.89     |
| GSTP1     | 2950           | -0.34    | -1.70    | -1.98    | 0.22     | -0.22    | -0.39    | -0.08    | -0.70    | -2.38    |
| GSTP1     | 2950           | -0.45    | -0.24    | -0.22    | 0.22     | -1.37    | 1.67     | -0.72    | -0.49    | -0.22    |
| GSTP1     | 2950           | 1.09     | -0.02    | -0.26    | -1.56    | -0.29    | -0.21    | -0.27    | -0.15    | 1.34     |
| GSTP1     | 2950           | -0.89    | -0.42    | -0.33    | 0.99     | -0.13    | 0.15     | 1.28     | 2.27     | 3.05     |
| ID4       | 3400           | 1.27     | 0.07     | 0.92     | -1.19    | -0.10    | -0.43    | 0.33     | -0.27    | -0.49    |
| ID4       | 3400           | -0.22    | -1.49    | -3.13    | -0.19    | -1.40    | -2.80    | -0.61    | -0.87    | -2.78    |
| ID4       | 3400           | -0.64    | -0.57    | -0.81    | 0.19     | 0.78     | 0.79     | -0.53    | 0.04     | 4.36     |
| ID4       | 3400           | -1.14    | 0.91     | 1.21     | -0.37    | -1.19    | -0.32    | -4.77    | -4.70    | -5.97    |
| MCAM      | 4162           | 0.25     | -0.63    | -3.00    | -0.49    | 0.37     | 1.19     | 0.44     | -1.45    | -0.40    |
| MCAM      | 4162           | -0.12    | 0.27     | -0.23    | -1.41    | -0.15    | -0.76    | -0.55    | -0.87    | -0.42    |
| MCAM      | 4162           | -0.40    | -0.83    | -0.45    | -1.42    | -1.98    | -2.27    | -0.71    | -1.60    | 2.50     |
| MCAM      | 4162           | 0.86     | 0.41     | 0.09     | -0.81    | -0.41    | -0.79    | 1.34     | 1.20     | 0.74     |
| PSAT1     | 29968          | -1.33    | -2.07    | -1.19    | -0.50    | -0.02    | -1.45    | -1.11    | -0.70    | -1.68    |
| PSAT1     | 29968          | 0.12     | -1.57    | -3.14    | 0.27     | -0.81    | -2.44    | -3.71    | -3.14    | -3.05    |
| PSAT1     | 29968          | -1.20    | -0.38    | -0.29    | -0.31    | -0.33    | 0.38     | 0.74     | 1.01     | 1.78     |

|        |       |       |       |       |       |       |       |       |       |       |
|--------|-------|-------|-------|-------|-------|-------|-------|-------|-------|-------|
| PSAT1  | 29968 | 0.53  | 1.07  | 2.58  | -0.07 | 0.56  | 1.77  | 0.21  | 1.00  | 0.18  |
| TM4SF1 | 4071  | 1.06  | 1.57  | 2.54  | -0.64 | -1.51 | -2.00 | -0.20 | 0.65  | -0.95 |
| TM4SF1 | 4071  | 0.64  | -0.13 | 1.25  | -1.69 | 0.20  | -0.31 | 2.03  | 0.94  | 0.48  |
| TM4SF1 | 4071  | -0.17 | 0.06  | 0.53  | 0.03  | 1.20  | 0.87  | -2.85 | -4.28 | -3.09 |
| TM4SF1 | 4071  | -0.03 | 0.33  | 0.51  | -0.38 | -0.40 | 0.86  | 0.69  | 0.17  | -0.96 |
| ZIC1   | 7545  | 0.32  | 1.29  | 1.50  | -0.49 | 2.04  | -0.11 | -0.16 | 0.82  | 1.03  |
| ZIC1   | 7545  | -1.16 | -1.20 | -0.97 | -0.71 | -2.43 | 0.16  | -0.82 | -2.74 | -0.43 |
| ZIC1   | 7545  | -0.44 | -1.69 | -0.55 | 0.62  | 0.05  | -1.66 | 0.36  | 0.01  | 0.02  |
| ZIC1   | 7545  | -0.31 | -1.39 | -1.44 | -0.43 | -1.21 | 0.01  | -1.89 | -2.74 | -4.18 |

**siRNA screen data for 10 "differential expression member" genes**

| Gene name | Entrez.Gene.Id | HER2_AU565 | HER2_AU565 | HER2_AU565 | ER_BT483 | ER_BT483 | ER_BT483 | HER2_SKBr3 | HER2_SKBr3 | HER2_SKBr3 |
|-----------|----------------|------------|------------|------------|----------|----------|----------|------------|------------|------------|
|           |                | HER2+      | HER2+      | HER2+      | ER+      | ER+      | ER+      | HER2+      | HER2+      | HER2+      |
| B3GNT9    | 84752          | -0.20      | -0.66      | -0.06      | 0.42     | -0.06    | 0.27     | 0.30       | 0.22       | 0.94       |
| B3GNT9    | 84752          | 1.58       | -0.03      | 1.16       | 0.19     | -0.36    | -0.11    | -0.58      | 0.84       | -0.31      |
| B3GNT9    | 84752          | 0.03       | -2.68      | -1.61      | -1.85    | -0.20    | -0.06    | 0.41       | 0.84       | 0.40       |
| B3GNT9    | 84752          | -1.40      | -0.49      | 0.24       | 0.95     | 1.14     | 1.00     | -0.60      | -0.22      | -1.85      |
| BTG3      | 10950          | 1.62       | 3.17       | 2.67       | 0.85     | 1.79     | 1.54     | 2.95       | 0.82       | 1.38       |
| BTG3      | 10950          | -2.61      | -3.25      | -3.20      | -0.20    | -1.41    | -1.12    | -2.37      | -0.96      | -1.67      |
| BTG3      | 10950          | 1.33       | -0.28      | 0.10       | 0.59     | 0.10     | 0.30     | 0.22       | 2.70       | 1.13       |
| BTG3      | 10950          | 0.29       | 0.65       | 0.81       | -3.73    | 0.10     | -1.48    | -3.17      | 0.67       | 0.79       |
| CHST3     | 9469           | 0.08       | 1.04       | -1.03      | -1.26    | -2.41    | -1.01    | -0.02      | 0.09       | 1.02       |
| CHST3     | 9469           | -2.70      | -1.57      | -2.31      | 0.23     | -1.19    | -0.13    | 0.60       | 0.41       | -0.38      |
| CHST3     | 9469           | 0.52       | 3.32       | 1.54       | 0.68     | 0.10     | 0.00     | -0.22      | 0.96       | 0.15       |
| CHST3     | 9469           | -0.79      | 0.54       | -0.07      | 1.04     | 0.25     | -1.72    | 0.03       | 0.34       | 0.58       |
| CSRP2     | 1466           | 4.55       | 3.76       | 1.56       | 0.88     | -0.29    | -0.63    | -0.72      | 0.30       | 1.02       |
| CSRP2     | 1466           | -3.29      | -2.12      | -1.82      | -0.25    | 1.19     | 0.13     | -1.32      | -0.80      | -1.21      |
| CSRP2     | 1466           | 1.30       | 2.13       | 1.71       | 0.17     | -0.03    | 0.33     | 2.97       | 0.74       | 0.38       |
| CSRP2     | 1466           | -1.95      | -0.21      | -1.33      | -0.23    | -0.27    | -0.80    | -0.40      | 0.07       | 0.22       |
| GSTP1     | 2950           | -0.05      | 0.52       | -0.44      | 0.49     | 0.39     | 0.66     | 0.31       | -0.03      | 0.00       |
| GSTP1     | 2950           | -1.93      | -0.14      | 0.48       | -0.83    | -1.81    | -0.19    | 0.04       | -0.12      | -0.91      |
| GSTP1     | 2950           | 0.49       | -0.34      | 0.22       | -0.06    | -0.74    | -5.42    | -0.29      | 0.36       | 0.47       |
| GSTP1     | 2950           | 0.16       | -0.08      | 1.00       | 0.02     | -0.27    | 1.06     | 2.07       | -0.01      | 1.40       |
| ID4       | 3400           | -2.37      | -1.94      | -0.52      | 0.23     | -0.29    | -0.23    | -0.38      | -1.07      | 1.48       |
| ID4       | 3400           | -2.03      | -1.63      | -2.52      | -1.76    | -1.13    | -2.50    | -3.13      | -1.42      | -1.47      |
| ID4       | 3400           | -2.56      | -1.17      | -2.23      | -0.87    | 0.78     | -0.27    | -0.90      | -1.08      | -0.82      |
| ID4       | 3400           | 1.74       | -1.77      | 0.93       | -1.61    | -1.44    | -1.51    | 0.82       | 0.30       | -0.24      |
| MCAM      | 4162           | -0.13      | 0.67       | -0.19      | 0.47     | 1.07     | 0.60     | -0.01      | 0.23       | 0.52       |
| MCAM      | 4162           | -0.42      | 0.63       | 0.68       | 0.32     | 0.98     | 0.23     | 1.14       | 1.66       | 1.75       |
| MCAM      | 4162           | -1.86      | -1.08      | -2.16      | -0.70    | -0.56    | -0.18    | -0.75      | -0.20      | -1.51      |
| MCAM      | 4162           | 0.19       | -0.20      | 0.65       | 0.31     | 1.62     | 0.94     | -0.62      | 0.30       | 0.88       |
| PSAT1     | 29968          | -1.27      | -2.34      | -1.73      | -1.66    | -3.99    | -0.15    | -3.04      | -0.94      | -2.43      |
| PSAT1     | 29968          | -0.06      | -0.16      | -1.59      | -1.41    | -3.11    | -1.06    | 3.28       | 0.76       | 2.09       |
| PSAT1     | 29968          | -1.54      | -1.69      | -0.50      | -0.25    | 0.48     | -0.30    | 0.30       | -0.52      | 0.14       |

|        |       |       |       |       |       |       |       |       |       |       |
|--------|-------|-------|-------|-------|-------|-------|-------|-------|-------|-------|
| PSAT1  | 29968 | 0.06  | 0.28  | 2.58  | -0.48 | 0.21  | 0.22  | -0.07 | -0.83 | 0.82  |
| TM4SF1 | 4071  | -1.63 | -1.11 | -0.96 | -1.08 | -0.29 | -0.36 | 0.44  | 0.03  | 0.09  |
| TM4SF1 | 4071  | 1.12  | 1.02  | 1.28  | 0.55  | -0.04 | 0.21  | 2.65  | 1.19  | 1.79  |
| TM4SF1 | 4071  | 0.61  | -0.82 | 1.07  | -2.57 | -1.71 | -1.17 | -0.30 | 0.35  | 0.32  |
| TM4SF1 | 4071  | -0.61 | -0.03 | -0.51 | 0.28  | 0.38  | 0.19  | -0.45 | 0.07  | -0.90 |
| ZIC1   | 7545  | 0.75  | 1.38  | 0.09  | 1.24  | 0.66  | 0.27  | 0.90  | 1.98  | 2.21  |
| ZIC1   | 7545  | -0.05 | -0.50 | -1.20 | -1.47 | -3.15 | -1.59 | 0.50  | 1.11  | -0.16 |
| ZIC1   | 7545  | 1.77  | -0.52 | 0.61  | 0.32  | 0.29  | 1.03  | 1.23  | 0.22  | -0.29 |
| ZIC1   | 7545  | -2.65 | -3.09 | -0.41 | 0.26  | 0.92  | 0.40  | 0.44  | -0.40 | -0.56 |



**siRNA screen data for 10 "differential expression member" genes**

| Gene name | Entrez.Gene.Id | ER_ZR751 | ER_ZR751 | ER_ZR751 |
|-----------|----------------|----------|----------|----------|
|           |                | ER+      | ER+      | ER+      |
| B3GNT9    | 84752          | 0.29     | 0.35     | 0.49     |
| B3GNT9    | 84752          | 0.58     | -0.51    | 0.56     |
| B3GNT9    | 84752          | 1.21     | 1.48     | 1.51     |
| B3GNT9    | 84752          | 2.47     | 0.18     | 1.36     |
| BTG3      | 10950          | 1.58     | -1.12    | -0.10    |
| BTG3      | 10950          | 0.37     | -0.33    | -1.09    |
| BTG3      | 10950          | 1.70     | 0.55     | 1.61     |
| BTG3      | 10950          | -1.02    | -0.18    | 0.10     |
| CHST3     | 9469           | 0.22     | 2.16     | 0.01     |
| CHST3     | 9469           | 0.87     | 0.44     | -1.20    |
| CHST3     | 9469           | 0.07     | 1.35     | 0.09     |
| CHST3     | 9469           | -0.03    | -1.64    | 2.38     |
| CSRP2     | 1466           | 2.19     | 1.12     | 1.26     |
| CSRP2     | 1466           | -2.74    | -2.25    | -0.44    |
| CSRP2     | 1466           | 1.74     | -0.44    | -0.09    |
| CSRP2     | 1466           | 0.12     | -1.44    | -0.23    |
| GSTP1     | 2950           | 0.84     | 1.43     | 0.33     |
| GSTP1     | 2950           | 1.20     | 0.06     | 0.14     |
| GSTP1     | 2950           | 1.41     | 0.16     | 1.17     |
| GSTP1     | 2950           | -1.18    | -0.46    | -1.21    |
| ID4       | 3400           | 1.58     | 0.81     | -0.28    |
| ID4       | 3400           | -2.67    | -0.67    | -1.44    |
| ID4       | 3400           | -0.08    | -1.97    | 1.60     |
| ID4       | 3400           | -2.91    | 0.50     | 1.78     |
| MCAM      | 4162           | 1.08     | 0.92     | 1.29     |
| MCAM      | 4162           | 0.50     | 1.20     | 0.09     |
| MCAM      | 4162           | -0.16    | -0.05    | -1.76    |
| MCAM      | 4162           | 0.86     | -2.29    | 1.09     |
| PSAT1     | 29968          | 0.42     | 1.30     | 0.28     |
| PSAT1     | 29968          | -0.70    | -1.19    | 0.18     |
| PSAT1     | 29968          | 2.11     | 1.42     | 0.44     |

|        |       |       |       |       |
|--------|-------|-------|-------|-------|
| PSAT1  | 29968 | 0.66  | -0.64 | 0.82  |
| TM4SF1 | 4071  | -1.42 | 0.13  | -1.35 |
| TM4SF1 | 4071  | 0.62  | 0.78  | 1.30  |
| TM4SF1 | 4071  | 0.93  | 1.18  | 2.56  |
| TM4SF1 | 4071  | -0.50 | 0.32  | 0.00  |
| ZIC1   | 7545  | 0.10  | 0.31  | -0.37 |
| ZIC1   | 7545  | -0.21 | 1.03  | 0.68  |
| ZIC1   | 7545  | 0.67  | -1.02 | 0.22  |
| ZIC1   | 7545  | 1.23  | 0.35  | -0.51 |

**siRNA screen data for 40 "driver network member" genes from driver networks**

| Gene name | Entrez.Gene.I d | BT20  | BT20  | BT20  | BT549 | BT549 | BT549 | HBL100 | HBL100 | HBL100 |
|-----------|-----------------|-------|-------|-------|-------|-------|-------|--------|--------|--------|
|           |                 | TNBC  | TNBC  | TNBC  | TNBC  | TNBC  | TNBC  | TNBC   | TNBC   | TNBC   |
| ANXA1     | 301             | 0.00  | -0.15 | -0.05 | 0.20  | 0.05  | -1.31 | -0.77  | -0.16  | -1.02  |
| ANXA1     | 301             | 0.59  | -0.32 | 0.28  | 0.96  | 0.64  | 0.52  | 1.42   | 2.12   | 0.59   |
| ANXA1     | 301             | -1.42 | -1.85 | -1.12 | -2.45 | 0.00  | -1.18 | 0.09   | 0.17   | -0.21  |
| ANXA1     | 301             | 0.36  | -0.42 | 0.22  | -1.12 | -1.15 | -1.65 | -0.20  | -0.37  | -0.94  |
| ATP1B3    | 483             | -0.58 | 0.34  | -0.37 | -0.95 | 0.06  | 0.40  | -1.86  | -1.78  | -0.85  |
| ATP1B3    | 483             | 1.38  | 0.79  | 1.60  | 1.01  | 0.07  | -0.06 | -1.52  | -2.95  | -2.08  |
| ATP1B3    | 483             | -1.06 | -0.73 | -0.98 | -0.91 | -1.15 | -0.50 | -1.31  | -1.99  | -3.23  |
| ATP1B3    | 483             | -0.16 | -0.52 | 0.70  | 0.50  | 0.34  | -0.50 | 0.21   | 1.74   | 1.55   |
| CAV2      | 858             | -1.06 | -0.07 | -0.47 | -0.32 | -0.02 | -1.48 | -1.35  | -1.44  | -0.76  |
| CAV2      | 858             | -0.31 | -0.76 | -0.59 | 0.33  | -0.09 | -1.10 | 0.10   | -0.19  | -0.44  |
| CAV2      | 858             | 0.12  | -0.23 | 1.28  | 0.88  | 0.47  | 1.26  | -0.06  | -0.32  | -0.30  |
| CAV2      | 858             | 1.30  | 1.40  | -0.54 | 1.08  | 1.10  | 0.31  | 1.75   | 2.56   | 2.72   |
| CD44      | 960             | 1.15  | -0.25 | 0.65  | -0.02 | 1.61  | 0.21  | 3.66   | 2.76   | 1.67   |
| CD44      | 960             | -0.42 | -0.16 | -1.20 | -0.55 | -0.06 | -0.12 | -0.73  | -0.69  | -0.38  |
| CD44      | 960             | -0.13 | 0.31  | -0.04 | -0.80 | -0.49 | -2.07 | 0.19   | -0.32  | -0.52  |
| CD44      | 960             | 0.22  | 0.32  | 0.54  | -1.00 | 0.56  | 1.28  | 0.92   | -0.23  | -0.23  |
| CDKN2A    | 1029            | 0.17  | 1.31  | 1.05  | -0.04 | -0.51 | -0.33 | -0.56  | -0.86  | 0.32   |
| CDKN2A    | 1029            | 1.75  | 1.51  | -1.94 | 0.07  | 0.06  | -0.30 | -1.20  | -0.41  | -0.34  |
| CDKN2A    | 1029            | -2.08 | -0.21 | -1.24 | 0.71  | 0.11  | -0.34 | 0.38   | 1.10   | 0.05   |
| CDKN2A    | 1029            | -0.24 | 0.03  | 0.20  | -0.12 | 0.40  | 0.59  | -0.60  | -0.24  | -0.47  |
| ENO1      | 2023            | -1.23 | 0.68  | -0.93 | 0.23  | 0.01  | -0.23 | 0.64   | 0.37   | -0.33  |
| ENO1      | 2023            | -0.24 | 0.09  | 0.33  | -1.49 | 0.37  | -0.53 | -0.64  | -0.24  | -0.43  |
| ENO1      | 2023            | -0.50 | -2.16 | 1.17  | 0.48  | 1.05  | -2.33 | 0.17   | 0.55   | -0.33  |
| ENO1      | 2023            | 0.60  | 0.26  | -0.66 | 0.26  | 0.51  | 1.59  | 1.28   | 1.39   | 0.78   |
| EPB41L2   | 2037            | 1.48  | 0.04  | 2.01  | 0.45  | 0.41  | 0.15  | -0.11  | -1.15  | -1.17  |
| EPB41L2   | 2037            | 2.00  | 0.52  | -0.26 | -0.02 | -0.65 | -0.19 | -0.02  | -0.07  | -0.44  |
| EPB41L2   | 2037            | -1.15 | 0.00  | -0.13 | -2.07 | -0.33 | -1.99 | -1.91  | -3.25  | -3.96  |
| EPB41L2   | 2037            | 0.36  | 1.23  | 1.48  | -0.06 | 0.63  | 0.44  | -0.08  | 0.68   | 0.03   |
| FOLR1     | 2348            | 1.06  | 1.39  | 1.90  | 0.04  | 0.45  | 0.19  | -0.05  | 0.16   | 0.36   |
| FOLR1     | 2348            | 0.01  | -0.73 | 0.57  | 0.17  | 0.05  | 0.08  | -2.35  | -2.53  | -2.01  |
| FOLR1     | 2348            | 1.07  | 0.79  | 1.71  | 0.19  | 0.88  | 0.78  | 2.72   | 0.94   | 1.59   |

|         |       |       |       |       |       |       |       |       |       |       |
|---------|-------|-------|-------|-------|-------|-------|-------|-------|-------|-------|
| FOLR1   | 2348  | 0.28  | -0.47 | -0.42 | -0.59 | 0.50  | 1.02  | -2.31 | -2.57 | -0.51 |
| ICAM1   | 3383  | 0.31  | 0.22  | 0.05  | -0.37 | 0.06  | -0.31 | -0.44 | 0.71  | -0.06 |
| ICAM1   | 3383  | 0.36  | -1.03 | 0.30  | 0.35  | -0.43 | -1.27 | -0.99 | -1.49 | -1.66 |
| ICAM1   | 3383  | -1.18 | -1.90 | 0.23  | 0.04  | 0.54  | 0.61  | -0.54 | -0.37 | -0.40 |
| ICAM1   | 3383  | 1.31  | 0.08  | 2.30  | 0.68  | 0.80  | 1.48  | 0.76  | 0.56  | 0.82  |
| IGF2BP2 | 10644 | 1.54  | -3.25 | 0.27  | 0.11  | 0.07  | 0.02  | 0.16  | 0.71  | 0.44  |
| IGF2BP2 | 10644 | 0.04  | 0.65  | 0.88  | 1.01  | 0.05  | -0.03 | 3.38  | 4.47  | 0.94  |
| IGF2BP2 | 10644 | -1.00 | -1.17 | -1.00 | -0.35 | -0.14 | -0.10 | -0.60 | -1.14 | -1.10 |
| IGF2BP2 | 10644 | -0.50 | -0.13 | -0.16 | -1.09 | -0.05 | -0.05 | -0.68 | 0.15  | -1.30 |
| IGF2BP3 | 10643 | -0.55 | -0.32 | -0.05 | -1.46 | 0.24  | 0.10  | -0.48 | -0.57 | 0.27  |
| IGF2BP3 | 10643 | -0.19 | -0.69 | 0.42  | 1.20  | -0.31 | 1.08  | 0.17  | -0.13 | -1.15 |
| IGF2BP3 | 10643 | -0.82 | -0.12 | -0.68 | -2.05 | 0.40  | -0.87 | 3.32  | 0.40  | 0.01  |
| IGF2BP3 | 10643 | 0.49  | -1.14 | 1.28  | -0.36 | 1.01  | -0.33 | 4.34  | 3.04  | 0.82  |
| IMPA2   | 3613  | 0.55  | -4.08 | -0.81 | -0.42 | 0.36  | 1.29  | 0.78  | 2.24  | 1.08  |
| IMPA2   | 3613  | 0.05  | 0.11  | 0.46  | -0.38 | -0.75 | 0.35  | 0.29  | -0.46 | 0.06  |
| IMPA2   | 3613  | 0.24  | -3.20 | -1.44 | 0.26  | 0.42  | 0.09  | -0.28 | -0.23 | -0.38 |
| IMPA2   | 3613  | -1.19 | -2.31 | -1.86 | -0.42 | -0.22 | 0.08  | -0.21 | -0.65 | -0.57 |
| KLF5    | 688   | -2.49 | 0.80  | 0.88  | 0.77  | 1.31  | 1.68  | -0.49 | 0.45  | 0.41  |
| KLF5    | 688   | -1.49 | -2.31 | 1.58  | 2.07  | -0.96 | 1.08  | -0.19 | -0.36 | -1.61 |
| KLF5    | 688   | -0.49 | -0.69 | -0.37 | -0.41 | 0.66  | -1.79 | -1.55 | -2.23 | -2.11 |
| KLF5    | 688   | -0.11 | 1.07  | 1.57  | -0.11 | 0.36  | -0.15 | 0.18  | 0.75  | -0.04 |
| LYN     | 4067  | -0.30 | 1.95  | 2.50  | 0.89  | 0.85  | 0.34  | 0.09  | 1.08  | -0.25 |
| LYN     | 4067  | -0.20 | -1.34 | -0.32 | -0.85 | -0.08 | -0.94 | -2.84 | -2.83 | -2.36 |
| LYN     | 4067  | 0.57  | 1.71  | 0.40  | 0.37  | -0.09 | 0.73  | -1.88 | -1.82 | -1.11 |
| LYN     | 4067  | 0.00  | -0.41 | 1.01  | 0.80  | 1.09  | 1.68  | 0.43  | 0.14  | 0.51  |
| MCM3    | 4172  | -2.99 | -1.03 | -1.33 | -0.38 | -1.01 | -0.18 | -3.25 | -2.57 | -1.95 |
| MCM3    | 4172  | -0.25 | -0.31 | -1.15 | -0.22 | 0.03  | -1.09 | -0.48 | -0.71 | -0.75 |
| MCM3    | 4172  | -3.06 | -2.40 | -2.28 | -5.19 | -2.39 | -1.90 | -7.11 | -5.54 | -4.42 |
| MCM3    | 4172  | 2.11  | 1.12  | 1.49  | 1.23  | -0.06 | 1.63  | 1.58  | 0.29  | 0.52  |
| MCM5    | 4174  | 1.12  | -1.30 | -0.43 | -0.38 | 0.22  | 1.57  | -0.28 | -0.14 | -0.66 |
| MCM5    | 4174  | -0.07 | 0.14  | 0.34  | 0.00  | -0.02 | 0.11  | 4.04  | 2.12  | 2.22  |
| MCM5    | 4174  | 0.48  | 1.14  | 1.16  | 2.71  | 0.03  | 1.69  | 0.02  | 0.38  | 0.04  |
| MCM5    | 4174  | -1.88 | -2.58 | -0.19 | -0.33 | -0.28 | 0.04  | 0.04  | -0.65 | -0.69 |
| MET     | 4233  | 0.82  | 0.34  | 0.84  | -0.43 | 1.35  | 1.70  | 0.47  | 6.39  | 0.80  |

|        |       |       |       |       |       |       |       |       |       |       |
|--------|-------|-------|-------|-------|-------|-------|-------|-------|-------|-------|
| MET    | 4233  | -0.43 | -1.03 | -2.19 | 0.04  | -0.88 | -0.57 | -0.86 | -0.37 | -0.74 |
| MET    | 4233  | -1.08 | -2.10 | -0.36 | -3.66 | -1.60 | -2.57 | -5.50 | -6.83 | -5.55 |
| MET    | 4233  | -0.58 | -1.54 | -1.43 | -0.09 | 1.31  | 0.58  | 0.86  | 2.60  | 0.53  |
| MSN    | 4478  | 0.78  | 0.90  | -0.01 | -0.15 | -0.47 | -0.67 | 2.25  | 1.26  | 2.89  |
| MSN    | 4478  | 0.21  | -0.86 | 1.45  | 0.96  | -0.28 | -0.48 | 0.38  | 0.17  | 0.57  |
| MSN    | 4478  | -0.39 | -0.21 | 0.28  | 0.59  | 1.24  | -1.34 | 0.30  | 0.29  | 0.04  |
| MSN    | 4478  | -1.52 | -1.05 | -0.96 | -0.79 | -0.67 | -0.44 | -0.79 | -1.85 | -2.99 |
| NCK1   | 4690  | -1.44 | 0.16  | 0.48  | -0.12 | 0.77  | 0.26  | -0.09 | 0.28  | 1.17  |
| NCK1   | 4690  | 0.62  | -0.49 | 0.40  | 0.00  | 0.22  | -0.35 | 0.16  | -0.27 | -0.96 |
| NCK1   | 4690  | 2.07  | 2.53  | 1.96  | 0.60  | 0.24  | 0.05  | -0.11 | 2.21  | 0.07  |
| NCK1   | 4690  | 0.19  | -1.87 | 0.18  | -1.42 | -0.53 | -0.64 | 0.28  | -0.47 | -0.87 |
| NDRG1  | 10397 | -0.59 | 0.20  | 0.00  | 0.19  | -0.35 | -0.10 | -0.70 | -1.41 | -0.87 |
| NDRG1  | 10397 | -0.36 | -0.30 | -0.59 | 0.04  | 0.25  | -0.05 | 0.04  | -0.05 | 0.03  |
| NDRG1  | 10397 | 0.05  | 0.67  | -0.38 | -0.11 | 0.03  | 0.95  | -1.07 | 0.22  | 0.64  |
| NDRG1  | 10397 | 0.40  | 0.80  | 0.91  | 2.83  | 0.72  | 1.01  | -0.57 | 0.48  | -0.13 |
| PLCG2  | 5336  | 0.93  | 0.32  | 1.35  | -0.65 | -1.18 | -1.58 | -1.48 | -4.61 | -2.51 |
| PLCG2  | 5336  | -0.03 | 1.30  | 0.27  | 2.75  | 0.13  | -0.32 | 3.69  | 4.11  | 2.09  |
| PLCG2  | 5336  | 1.11  | -0.22 | -0.03 | -0.20 | -0.39 | 1.02  | 1.19  | 1.09  | 0.49  |
| PLCG2  | 5336  | 1.84  | 1.82  | 0.90  | -0.31 | -0.66 | 0.06  | -0.39 | -1.58 | -1.05 |
| PRKDC  | 5591  | -1.47 | -0.20 | -0.22 | -1.43 | -1.27 | -1.69 | -0.14 | -0.75 | -0.48 |
| PRKDC  | 5591  | -2.47 | 0.15  | 0.30  | 0.22  | -0.26 | 0.08  | -0.11 | 0.00  | 0.88  |
| PRKDC  | 5591  | 0.76  | -0.20 | 0.43  | 1.49  | 0.72  | 0.44  | 0.75  | 1.40  | 0.23  |
| PRKDC  | 5591  | 1.74  | 2.54  | 1.59  | -0.09 | 0.31  | -0.57 | 0.96  | -0.15 | -0.68 |
| PRNP   | 5621  | -0.54 | 0.43  | 0.27  | 0.23  | -0.81 | -1.23 | -1.39 | -1.60 | -1.48 |
| PRNP   | 5621  | -2.33 | -1.59 | -2.86 | -0.48 | -1.26 | -0.93 | 0.23  | -1.47 | -0.89 |
| PRNP   | 5621  | 0.75  | -1.39 | 1.28  | 0.36  | 0.87  | 0.19  | -0.02 | 2.23  | 0.49  |
| PRNP   | 5621  | 1.00  | 0.62  | 1.12  | 0.13  | 0.23  | 0.68  | 0.89  | 1.55  | 1.77  |
| S100A1 | 6271  | 2.27  | 1.00  | 1.54  | 0.45  | -0.10 | 0.33  | 0.93  | 0.21  | 0.05  |
| S100A1 | 6271  | -0.12 | 0.54  | 1.43  | 0.41  | -1.02 | 0.60  | 0.44  | 0.10  | -0.43 |
| S100A1 | 6271  | 0.11  | 0.46  | 0.63  | -0.10 | 0.22  | -0.37 | -1.06 | -1.98 | -0.32 |
| S100A1 | 6271  | -0.03 | 0.10  | -0.30 | 0.26  | 0.48  | 0.37  | -0.33 | -0.83 | -0.81 |
| S100B  | 6285  | -1.05 | -0.81 | 0.13  | -0.52 | -1.00 | -0.63 | -2.13 | -2.06 | -2.81 |
| S100B  | 6285  | -0.11 | -0.91 | -0.61 | 0.76  | 0.81  | 2.20  | 0.35  | 0.63  | 0.91  |
| S100B  | 6285  | 1.56  | 0.19  | -0.12 | 0.37  | 0.78  | 1.29  | 1.21  | 1.45  | 1.88  |

|       |       |       |       |       |       |       |       |       |       |       |
|-------|-------|-------|-------|-------|-------|-------|-------|-------|-------|-------|
| S100B | 6285  | 1.11  | 0.05  | 0.87  | 1.09  | 0.75  | -0.56 | 0.19  | 1.33  | -0.65 |
| STK38 | 11329 | 2.07  | 3.02  | 3.05  | 0.40  | -0.58 | 0.00  | 0.98  | 2.36  | 0.59  |
| STK38 | 11329 | -1.28 | -0.28 | -1.03 | -1.73 | -1.27 | -0.87 | -0.61 | -1.22 | -1.80 |
| STK38 | 11329 | 0.51  | -0.54 | 2.13  | 0.25  | 0.40  | 2.41  | -0.02 | 0.07  | -0.50 |
| STK38 | 11329 | 0.31  | -0.08 | 0.46  | -0.48 | -0.81 | 1.35  | 0.70  | 1.49  | 0.70  |
| TGFBI | 7045  | -1.34 | -0.90 | -2.06 | -0.84 | -0.26 | -3.00 | -0.66 | -0.58 | 0.18  |
| TGFBI | 7045  | -0.66 | 1.01  | 0.08  | -0.19 | -0.15 | -1.78 | -0.98 | -0.14 | -0.57 |
| TGFBI | 7045  | 1.18  | -0.85 | 2.79  | 0.05  | 0.98  | -1.09 | 3.09  | 3.63  | 2.71  |
| TGFBI | 7045  | -0.17 | 1.84  | 0.51  | 1.86  | 1.67  | 1.24  | 1.88  | 0.32  | 0.04  |
| UCHL1 | 7345  | 0.12  | 0.13  | 0.60  | 1.50  | -0.12 | -0.42 | -0.28 | -0.36 | -0.90 |
| UCHL1 | 7345  | -1.96 | -3.27 | -2.30 | -3.19 | -1.44 | -2.36 | -3.24 | -4.56 | -3.93 |
| UCHL1 | 7345  | 0.47  | 0.91  | 2.10  | -0.14 | 0.34  | 0.02  | -0.35 | -1.10 | -0.78 |
| UCHL1 | 7345  | 0.28  | -0.06 | -1.00 | -0.98 | -1.31 | -1.07 | -1.33 | -2.22 | -2.91 |
| VCAM1 | 7412  | 2.68  | 0.22  | 1.74  | -0.91 | 0.07  | -2.67 | -0.01 | -1.00 | 0.02  |
| VCAM1 | 7412  | 0.39  | 0.72  | 1.25  | -1.95 | -0.44 | -0.28 | 0.24  | 1.08  | 0.69  |
| VCAM1 | 7412  | 0.46  | 1.29  | 1.42  | 1.20  | 0.22  | 0.65  | 0.47  | 0.21  | 1.41  |
| VCAM1 | 7412  | 0.68  | 0.84  | 2.53  | -0.06 | -0.31 | 0.36  | 0.60  | 0.02  | 0.77  |
| WWTR1 | 25937 | 0.21  | 1.54  | 0.98  | -0.19 | -0.40 | -0.39 | -3.50 | -2.99 | -2.42 |
| WWTR1 | 25937 | 0.06  | -0.47 | 0.09  | -1.10 | -0.78 | -1.25 | -1.40 | 0.06  | -0.89 |
| WWTR1 | 25937 | 0.29  | -2.52 | 0.52  | 0.04  | -0.28 | -0.02 | 0.60  | 0.09  | 0.83  |
| WWTR1 | 25937 | -0.31 | -0.05 | -1.48 | -0.38 | -0.88 | 0.08  | -1.02 | -1.35 | -3.05 |

**siRNA screen data for 40 "driver network member" genes from driver networks**

| Gene name | Entrez.Gene.id | HS578T | HS578T | HS578T | MDAMB157 | MDAMB157 | MDAMB157 | MDAMB231 | MDAMB231 | MDAMB231 |
|-----------|----------------|--------|--------|--------|----------|----------|----------|----------|----------|----------|
|           |                | TNBC   | TNBC   | TNBC   | TNBC     | TNBC     | TNBC     | TNBC     | TNBC     | TNBC     |
| ANXA1     | 301            | -0.77  | -0.05  | 0.06   | 2.77     | 1.93     | 2.34     | -0.23    | 0.33     | -0.51    |
| ANXA1     | 301            | -0.54  | -1.25  | 0.04   | 0.85     | 0.59     | 0.61     | 0.06     | 0.11     | -3.22    |
| ANXA1     | 301            | -0.96  | -2.17  | -1.12  | -0.79    | 15.70    | -0.84    | 0.13     | -1.51    | -1.07    |
| ANXA1     | 301            | 0.92   | -0.74  | 0.53   | 1.68     | 1.73     | 1.04     | -0.95    | -3.28    | -0.83    |
| ATP1B3    | 483            | -0.53  | -1.03  | -0.51  | -1.47    | -0.46    | -1.49    | 0.20     | -0.26    | 0.24     |
| ATP1B3    | 483            | -0.96  | 0.24   | -1.78  | -1.45    | -1.82    | -1.52    | 0.21     | 1.00     | -0.59    |
| ATP1B3    | 483            | -0.77  | -2.50  | -1.68  | -2.27    | -3.93    | -2.92    | -0.67    | -1.44    | -0.87    |
| ATP1B3    | 483            | 1.30   | 0.88   | 0.47   | 0.45     | 1.26     | 1.51     | -0.72    | 1.13     | -1.06    |
| CAV2      | 858            | 0.05   | 0.98   | 0.64   | -0.03    | 0.03     | -0.49    | 0.28     | -0.15    | -0.99    |
| CAV2      | 858            | -0.45  | -0.10  | 1.09   | -0.01    | 0.20     | -0.13    | -0.37    | -0.55    | -0.59    |
| CAV2      | 858            | 0.26   | 2.55   | 0.71   | 1.20     | 1.81     | 2.60     | 0.49     | 1.58     | 0.11     |
| CAV2      | 858            | 1.20   | -0.17  | 2.00   | 5.56     | 4.82     | 2.09     | -0.03    | -0.16    | 1.45     |
| CD44      | 960            | 0.17   | 0.36   | 0.24   | 1.86     | 2.63     | 1.34     | 0.95     | 1.26     | 2.84     |
| CD44      | 960            | -0.46  | 0.30   | 0.14   | -0.27    | -0.58    | -0.49    | 0.61     | 0.54     | -1.06    |
| CD44      | 960            | -3.28  | -2.80  | -2.44  | -1.43    | -1.30    | -2.10    | -1.23    | -1.49    | -1.98    |
| CD44      | 960            | 0.24   | 0.64   | -0.43  | 5.68     | 0.93     | 0.27     | -0.11    | 0.13     | 0.28     |
| CDKN2A    | 1029           | -0.42  | 1.18   | 2.80   | 2.31     | 2.78     | 4.26     | 0.41     | 0.60     | 0.13     |
| CDKN2A    | 1029           | -0.50  | -1.08  | -0.42  | -0.19    | 0.10     | -0.84    | -0.92    | 0.71     | 1.76     |
| CDKN2A    | 1029           | -0.39  | 1.42   | 0.74   | 1.75     | 2.27     | 1.82     | -0.02    | 0.22     | -0.29    |
| CDKN2A    | 1029           | -0.66  | -0.11  | -0.23  | 0.15     | 0.26     | 0.87     | -0.84    | -2.53    | -1.86    |
| ENO1      | 2023           | -0.40  | 0.26   | 1.50   | 1.68     | 0.68     | 0.57     | 0.87     | 2.13     | -0.34    |
| ENO1      | 2023           | -0.76  | -1.26  | -0.43  | 0.25     | 0.69     | -0.32    | -1.64    | -1.18    | -2.91    |
| ENO1      | 2023           | 1.38   | 2.67   | 0.98   | 0.63     | 1.00     | 1.96     | 0.69     | 0.00     | -0.96    |
| ENO1      | 2023           | 0.63   | 0.31   | 2.12   | 1.25     | 0.29     | 1.11     | -0.25    | 0.21     | -0.26    |
| EPB41L2   | 2037           | 1.32   | -0.45  | -0.62  | 1.51     | 0.50     | 0.83     | 0.14     | 1.43     | -2.72    |
| EPB41L2   | 2037           | -0.66  | -1.34  | 0.00   | 4.53     | 1.83     | 1.07     | 0.55     | -0.07    | -2.01    |
| EPB41L2   | 2037           | -3.09  | -1.42  | -2.86  | -2.63    | -2.85    | -3.70    | -0.83    | -1.28    | -0.52    |
| EPB41L2   | 2037           | 2.08   | 0.81   | 2.02   | 0.65     | 0.46     | 0.40     | 0.13     | 0.79     | 1.53     |
| FOLR1     | 2348           | 0.27   | -0.02  | 0.43   | 3.39     | 0.55     | 2.69     | -0.47    | -0.17    | 0.71     |
| FOLR1     | 2348           | -0.09  | 0.32   | 0.32   | 0.17     | -0.82    | 0.04     | -1.43    | 0.14     | -0.59    |
| FOLR1     | 2348           | 0.18   | -1.09  | -1.11  | 1.99     | 1.68     | 1.94     | 0.10     | 0.69     | 1.11     |

|         |       |       |       |       |       |       |       |       |       |       |
|---------|-------|-------|-------|-------|-------|-------|-------|-------|-------|-------|
| FOLR1   | 2348  | -1.36 | -1.58 | -0.40 | 2.33  | 2.85  | 0.37  | 0.30  | -0.37 | -0.10 |
| ICAM1   | 3383  | -0.93 | -0.91 | 0.01  | -0.29 | 0.06  | 0.01  | -1.68 | 0.20  | -0.15 |
| ICAM1   | 3383  | -0.63 | 1.08  | -0.12 | 2.46  | 2.81  | 3.72  | 0.26  | 1.00  | 0.43  |
| ICAM1   | 3383  | 0.33  | 1.17  | 1.91  | -0.54 | -2.28 | 1.32  | 0.16  | -1.03 | 0.00  |
| ICAM1   | 3383  | 0.88  | 1.65  | 0.80  | 3.86  | 5.31  | 1.34  | -0.75 | 3.15  | 1.21  |
| IGF2BP2 | 10644 | 0.05  | 1.57  | 0.19  | 2.21  | 2.31  | 1.13  | 0.13  | -0.46 | -1.30 |
| IGF2BP2 | 10644 | 0.38  | -1.41 | -0.14 | 3.13  | 2.66  | 1.78  | -0.69 | -0.28 | -1.18 |
| IGF2BP2 | 10644 | -0.60 | -0.50 | -0.26 | -0.57 | -1.65 | -1.12 | -0.90 | -0.46 | -0.65 |
| IGF2BP2 | 10644 | 8.70  | -1.34 | -0.69 | -2.84 | -1.93 | -1.49 | -1.62 | -0.16 | -0.82 |
| IGF2BP3 | 10643 | -0.96 | -1.35 | -0.23 | 0.94  | -0.31 | -0.12 | -0.79 | -0.42 | -2.87 |
| IGF2BP3 | 10643 | 0.63  | -0.09 | 0.18  | -0.97 | -1.57 | -0.72 | 0.18  | -0.06 | -1.12 |
| IGF2BP3 | 10643 | 1.47  | 0.08  | -0.30 | 0.62  | 1.05  | 0.46  | -0.96 | 1.05  | -0.12 |
| IGF2BP3 | 10643 | 0.23  | 0.01  | 1.36  | 4.95  | 2.40  | 2.02  | -0.12 | -0.01 | -1.17 |
| IMPA2   | 3613  | 1.22  | 0.80  | 0.02  | -0.97 | 1.11  | 0.41  | 0.05  | 0.97  | -0.05 |
| IMPA2   | 3613  | 1.13  | 0.88  | 0.93  | -2.12 | -2.52 | -0.72 | -0.45 | -2.79 | -0.90 |
| IMPA2   | 3613  | -0.74 | 0.28  | -0.35 | -0.52 | -0.94 | -1.59 | -0.99 | -2.23 | -0.91 |
| IMPA2   | 3613  | 0.60  | 0.48  | -0.07 | -0.75 | 0.39  | 0.59  | -0.84 | -0.28 | 0.64  |
| KLF5    | 688   | -0.44 | -0.27 | -0.28 | 0.15  | 0.11  | 0.20  | -0.57 | 0.57  | -1.80 |
| KLF5    | 688   | 1.02  | 2.78  | 1.62  | 0.55  | 0.50  | 0.55  | 0.21  | -0.72 | -1.35 |
| KLF5    | 688   | -0.29 | -1.07 | -1.89 | -5.26 | -4.55 | -3.30 | 0.03  | 0.21  | -1.22 |
| KLF5    | 688   | 0.28  | -0.63 | 1.55  | 0.90  | 2.62  | 1.20  | 0.52  | 1.60  | -2.19 |
| LYN     | 4067  | 2.05  | 4.46  | 2.76  | 4.43  | 1.33  | 2.08  | 0.79  | -0.23 | -1.76 |
| LYN     | 4067  | -1.08 | -1.54 | -0.97 | -0.98 | -0.60 | -1.87 | 0.50  | -0.83 | 1.39  |
| LYN     | 4067  | -0.16 | 0.40  | 0.97  | 0.29  | -0.18 | -1.15 | 1.15  | -0.36 | 0.87  |
| LYN     | 4067  | 0.49  | 3.86  | 3.55  | 4.92  | 3.83  | 3.35  | 0.13  | 3.74  | 2.32  |
| MCM3    | 4172  | -0.66 | 0.09  | 0.04  | 1.11  | 2.09  | 1.53  | -0.14 | 0.10  | -1.26 |
| MCM3    | 4172  | -1.01 | -0.69 | -0.14 | -0.70 | -1.21 | -2.07 | -0.30 | -0.26 | -1.43 |
| MCM3    | 4172  | -2.49 | -2.30 | -1.89 | -5.62 | -6.86 | -5.54 | -1.26 | -2.21 | -4.48 |
| MCM3    | 4172  | 4.21  | 1.23  | 4.44  | 5.47  | 7.04  | 2.05  | 1.62  | 3.90  | 1.57  |
| MCM5    | 4174  | -0.48 | 0.37  | -1.57 | 0.54  | 0.81  | 0.80  | 0.27  | 0.37  | -0.32 |
| MCM5    | 4174  | -0.33 | 1.57  | 0.22  | 1.52  | 2.64  | 0.93  | -0.46 | 0.23  | -1.30 |
| MCM5    | 4174  | 1.63  | -0.11 | 1.96  | 0.27  | 1.63  | 0.64  | -0.43 | -0.35 | -0.54 |
| MCM5    | 4174  | -0.51 | -0.04 | 1.09  | 0.30  | 1.40  | 0.76  | -1.41 | -1.37 | -0.71 |
| MET     | 4233  | -0.14 | 24.44 | 0.07  | -2.49 | -1.75 | -1.87 | -0.07 | -0.76 | -2.29 |



|        |       |       |       |       |       |       |       |       |       |       |
|--------|-------|-------|-------|-------|-------|-------|-------|-------|-------|-------|
| MET    | 4233  | 0.02  | 1.15  | 0.09  | -0.64 | 1.32  | 0.47  | -0.31 | -1.06 | -2.44 |
| MET    | 4233  | -2.07 | -2.45 | -3.48 | -8.19 | -6.11 | -5.86 | -0.56 | -6.59 | -1.49 |
| MET    | 4233  | 2.50  | 1.01  | 1.99  | 1.21  | 2.11  | 1.27  | -0.18 | -2.36 | 0.31  |
| MSN    | 4478  | 0.73  | -0.07 | 0.68  | 0.92  | 0.48  | -0.82 | 1.03  | 0.46  | -0.37 |
| MSN    | 4478  | 0.65  | 0.50  | 1.64  | 2.00  | 1.09  | 1.10  | -0.47 | -0.43 | -0.69 |
| MSN    | 4478  | 1.15  | 0.66  | 1.16  | 0.69  | 1.21  | 1.20  | 1.28  | -0.47 | -0.22 |
| MSN    | 4478  | -2.82 | -2.50 | -1.48 | -3.45 | -4.98 | -3.95 | -1.07 | -1.45 | -1.28 |
| NCK1   | 4690  | -0.53 | -0.90 | -0.24 | -2.54 | -2.28 | -1.71 | -0.91 | 0.43  | -0.75 |
| NCK1   | 4690  | -1.63 | -1.08 | -0.86 | 0.84  | -0.54 | 0.43  | 0.17  | -0.07 | 0.43  |
| NCK1   | 4690  | 0.18  | 1.59  | 0.28  | 5.83  | 5.33  | 1.97  | -0.08 | 0.22  | 2.62  |
| NCK1   | 4690  | -0.82 | -1.74 | -1.89 | 1.09  | 1.34  | 1.24  | -1.89 | -1.51 | -1.72 |
| NDRG1  | 10397 | -0.75 | -1.74 | -0.02 | -2.58 | -0.94 | -2.00 | -0.64 | -0.62 | -1.49 |
| NDRG1  | 10397 | 0.10  | -0.05 | 0.77  | -1.03 | 0.16  | -1.92 | 0.36  | -0.33 | 0.11  |
| NDRG1  | 10397 | -0.97 | -0.20 | 1.09  | 1.61  | 0.16  | 0.21  | -1.27 | -0.15 | -1.09 |
| NDRG1  | 10397 | 0.25  | -0.03 | -0.12 | -0.16 | -0.07 | 0.16  | -1.41 | -1.14 | -2.11 |
| PLCG2  | 5336  | -2.29 | -3.39 | -2.24 | -4.04 | -2.21 | -3.09 | -0.08 | -0.63 | -1.02 |
| PLCG2  | 5336  | -0.44 | 1.88  | 1.63  | 0.68  | 1.49  | 0.62  | 1.24  | -0.17 | -0.24 |
| PLCG2  | 5336  | -0.71 | 0.13  | 0.07  | -0.60 | -0.91 | 0.18  | -0.70 | -1.08 | -2.00 |
| PLCG2  | 5336  | 1.23  | -0.29 | -0.03 | 2.28  | 1.54  | 1.54  | -0.82 | 2.01  | 0.14  |
| PRKDC  | 5591  | -0.47 | -0.29 | -1.88 | -0.09 | 0.04  | 0.43  | -0.47 | -2.18 | -2.45 |
| PRKDC  | 5591  | -0.90 | 0.10  | -0.70 | 1.10  | 1.13  | 0.85  | 0.26  | -0.28 | -0.45 |
| PRKDC  | 5591  | 0.88  | -0.22 | 0.47  | 2.66  | 1.07  | 0.37  | -0.37 | 2.29  | -0.20 |
| PRKDC  | 5591  | 0.00  | -0.13 | 1.18  | -1.31 | -0.56 | 0.36  | 0.96  | 0.73  | 0.63  |
| PRNP   | 5621  | -1.06 | -0.64 | -0.73 | -0.64 | -0.13 | -0.04 | -0.73 | -1.45 | -3.31 |
| PRNP   | 5621  | -0.70 | -2.04 | -1.98 | -1.78 | -2.41 | -1.39 | -2.04 | -1.43 | -1.95 |
| PRNP   | 5621  | -0.38 | -0.81 | 0.22  | -0.35 | -0.95 | -0.31 | 0.09  | 1.10  | 0.63  |
| PRNP   | 5621  | 2.56  | 1.33  | 0.86  | 2.13  | 5.33  | 3.78  | -0.57 | 0.28  | 0.07  |
| S100A1 | 6271  | 5.02  | 6.21  | 3.37  | 2.52  | 2.29  | 3.57  | -0.27 | 2.31  | 0.94  |
| S100A1 | 6271  | 1.10  | 2.99  | 1.44  | -0.22 | 0.12  | 0.45  | 0.11  | 0.56  | 0.69  |
| S100A1 | 6271  | 0.30  | -0.43 | 0.35  | 5.71  | 2.44  | 3.85  | -0.72 | -3.21 | -0.99 |
| S100A1 | 6271  | 0.45  | -0.47 | -0.45 | -2.07 | -1.49 | -1.68 | -1.49 | -1.74 | -2.68 |
| S100B  | 6285  | -2.29 | -2.97 | 0.31  | -1.82 | 0.44  | -0.49 | -1.37 | -2.05 | -1.16 |
| S100B  | 6285  | 0.88  | 0.92  | 1.99  | 1.35  | 2.24  | 1.25  | 0.00  | 1.13  | 1.74  |
| S100B  | 6285  | 3.51  | 2.10  | 2.17  | 4.18  | 6.91  | 3.67  | 1.19  | -2.25 | 0.18  |

|       |       |       |       |       |       |       |       |       |       |       |
|-------|-------|-------|-------|-------|-------|-------|-------|-------|-------|-------|
| S100B | 6285  | 1.68  | -0.38 | 0.99  | -1.14 | -0.73 | -0.60 | -0.64 | 0.69  | 0.16  |
| STK38 | 11329 | 1.49  | 5.29  | 3.09  | 3.60  | 2.30  | 2.82  | 2.02  | 0.73  | 1.13  |
| STK38 | 11329 | -0.52 | -0.40 | -1.50 | -0.98 | -1.20 | -1.06 | -0.12 | -1.25 | -0.96 |
| STK38 | 11329 | -1.22 | -3.45 | -4.06 | -1.76 | -1.26 | -1.72 | -0.46 | -1.38 | -1.25 |
| STK38 | 11329 | 1.81  | 0.46  | -0.32 | 1.38  | 2.17  | 1.27  | -0.41 | -1.89 | 0.87  |
| TGFBI | 7045  | 0.37  | 0.40  | 0.94  | -0.13 | -0.12 | -0.52 | -2.14 | -1.02 | -1.61 |
| TGFBI | 7045  | -0.37 | -0.65 | -0.89 | -1.27 | -0.32 | -0.12 | -1.00 | 0.46  | -0.56 |
| TGFBI | 7045  | 0.06  | -1.53 | 0.45  | -0.88 | 0.38  | 0.23  | 1.74  | -1.17 | 0.86  |
| TGFBI | 7045  | 2.37  | 2.70  | 2.87  | 3.64  | 3.99  | 2.00  | 1.25  | 0.71  | 1.33  |
| UCHL1 | 7345  | -1.49 | -0.56 | 0.03  | -0.55 | -0.56 | -1.12 | 0.21  | -0.65 | -1.40 |
| UCHL1 | 7345  | -1.57 | -4.90 | -2.65 | -3.42 | -4.87 | -3.03 | -0.30 | -0.09 | -0.89 |
| UCHL1 | 7345  | 0.05  | -1.98 | -0.05 | 1.48  | 0.95  | 1.42  | 1.89  | 0.33  | 0.51  |
| UCHL1 | 7345  | -3.18 | -2.90 | -2.16 | -3.01 | -4.87 | -3.54 | -1.30 | -2.15 | -1.23 |
| VCAM1 | 7412  | -0.46 | -0.28 | 0.28  | -0.79 | -0.08 | -0.79 | -0.33 | -1.14 | -0.06 |
| VCAM1 | 7412  | -0.25 | -0.04 | -0.21 | 0.42  | 0.86  | 0.79  | -0.56 | -1.52 | -0.56 |
| VCAM1 | 7412  | 0.83  | 2.08  | 2.68  | 2.26  | 2.66  | 3.13  | 0.21  | 1.19  | 0.48  |
| VCAM1 | 7412  | 2.83  | 2.11  | 0.80  | 2.79  | 2.71  | 1.30  | -0.89 | 2.08  | 1.32  |
| WWTR1 | 25937 | -0.63 | -0.47 | -0.49 | 0.68  | 1.40  | 0.72  | -0.14 | -0.91 | -0.26 |
| WWTR1 | 25937 | -0.46 | -1.71 | -3.15 | -4.62 | -1.81 | -2.37 | 0.54  | 0.79  | 1.27  |
| WWTR1 | 25937 | 0.92  | 0.82  | 0.83  | 2.03  | 2.25  | 2.94  | -0.42 | 0.34  | 0.71  |
| WWTR1 | 25937 | -2.70 | -2.88 | -1.77 | -3.42 | -6.68 | -5.64 | -1.60 | -1.73 | -2.70 |

**siRNA screen data for 40 "driver network member" genes from driver networks**

| Gene name | Entrez.Gene.I d | MDAMB436 | MDAMB436 | MDAMB436 | MDAMB453 | MDAMB453 | MDAMB453 | MDAMB468 | MDAMB468 | MDAMB468 |
|-----------|-----------------|----------|----------|----------|----------|----------|----------|----------|----------|----------|
|           |                 | TNBC     | TNBC     | TNBC     | TNBC     | TNBC     | TNBC     | TNBC     | TNBC     | TNBC     |
| ANXA1     | 301             | 1.09     | 1.65     | 1.19     | 0.05     | -0.67    | -0.98    | 1.07     | 3.28     | 1.26     |
| ANXA1     | 301             | 2.06     | 0.06     | 4.05     | -1.26    | 0.51     | 1.68     | -0.25    | -3.36    | -1.10    |
| ANXA1     | 301             | -1.15    | -0.77    | -2.01    | -1.88    | -2.25    | -2.20    | -0.37    | 2.42     | -1.24    |
| ANXA1     | 301             | -0.63    | -0.14    | -0.23    | -0.58    | -0.81    | -1.20    | 2.34     | 1.63     | 1.35     |
| ATP1B3    | 483             | -0.02    | -0.68    | -3.10    | -0.96    | 0.25     | -0.67    | -1.38    | -2.21    | -0.42    |
| ATP1B3    | 483             | -1.41    | -0.66    | -1.25    | 1.31     | -1.71    | 2.04     | -0.71    | 0.14     | -0.24    |
| ATP1B3    | 483             | -3.67    | -2.81    | -2.87    | -1.60    | -0.29    | 0.59     | -2.22    | -1.37    | -2.51    |
| ATP1B3    | 483             | -2.99    | 0.29     | -0.57    | -0.81    | 0.31     | 0.79     | -0.27    | -0.14    | -0.38    |
| CAV2      | 858             | 0.90     | 0.78     | 2.43     | -1.06    | -2.17    | -2.31    | -1.99    | -1.64    | -1.50    |
| CAV2      | 858             | -0.11    | -0.56    | -0.78    | -1.56    | -1.25    | -1.00    | -0.54    | -1.56    | -0.77    |
| CAV2      | 858             | 1.02     | -0.33    | 3.35     | -0.61    | 2.51     | -2.36    | -1.04    | 2.72     | 0.16     |
| CAV2      | 858             | 1.65     | 1.70     | 1.96     | -0.77    | -0.15    | -0.53    | 1.85     | 3.08     | 2.78     |
| CD44      | 960             | -0.14    | 1.82     | 2.20     | -0.67    | 0.20     | 0.12     | 0.08     | 0.62     | -0.33    |
| CD44      | 960             | 0.72     | -2.31    | -1.86    | -1.54    | -0.22    | -0.68    | -0.49    | -1.46    | 0.06     |
| CD44      | 960             | -2.33    | -2.20    | -3.62    | 0.09     | 1.06     | 1.97     | -0.29    | -0.62    | -0.17    |
| CD44      | 960             | 0.77     | 2.39     | 1.75     | -0.06    | 0.77     | -0.35    | 0.80     | -1.25    | -1.27    |
| CDKN2A    | 1029            | 0.21     | -0.25    | 0.01     | -0.15    | 0.72     | 1.51     | 0.05     | 1.89     | 0.16     |
| CDKN2A    | 1029            | -0.82    | -0.42    | -0.10    | -1.63    | -0.24    | -1.02    | 0.54     | -1.00    | -0.08    |
| CDKN2A    | 1029            | -0.06    | -0.65    | 0.76     | -1.36    | -0.77    | -0.53    | -0.61    | -2.59    | -1.54    |
| CDKN2A    | 1029            | 3.87     | 0.28     | -0.24    | -3.22    | -0.09    | 0.37     | 0.18     | -0.87    | -0.30    |
| ENO1      | 2023            | 0.70     | -0.60    | -0.41    | -1.17    | -0.81    | 0.08     | 1.80     | 1.04     | 2.77     |
| ENO1      | 2023            | -1.15    | -0.52    | -0.87    | -1.35    | -0.39    | -1.95    | 0.06     | -1.28    | -1.04    |
| ENO1      | 2023            | 1.54     | -1.03    | -3.04    | -2.98    | -0.21    | -0.02    | 0.36     | -0.37    | -1.26    |
| ENO1      | 2023            | 0.49     | 0.01     | 0.96     | 1.32     | 0.67     | 1.29     | 0.94     | 0.01     | 0.63     |
| EPB41L2   | 2037            | 1.01     | 2.07     | 0.46     | -0.80    | -0.55    | -1.89    | 0.06     | -1.68    | -1.24    |
| EPB41L2   | 2037            | 0.77     | -0.11    | 1.26     | -0.81    | 1.37     | -1.38    | -0.91    | -0.08    | 0.01     |
| EPB41L2   | 2037            | -0.96    | -1.60    | -3.72    | -0.55    | -0.52    | -1.34    | -2.77    | -1.69    | -10.15   |
| EPB41L2   | 2037            | 2.98     | 2.76     | 3.43     | 1.38     | 2.32     | 1.27     | 0.28     | 2.57     | 1.82     |
| FOLR1     | 2348            | -1.21    | -1.13    | -0.33    | -0.58    | -1.19    | -0.76    | -2.57    | -0.54    | -0.63    |
| FOLR1     | 2348            | 0.25     | -0.78    | -0.09    | 0.47     | -1.22    | 0.65     | -2.00    | -4.08    | -3.20    |
| FOLR1     | 2348            | 0.62     | 1.28     | 1.50     | 0.58     | -0.07    | -0.52    | 0.19     | 0.45     | 0.00     |

|         |       |       |       |        |       |       |       |       |       |       |
|---------|-------|-------|-------|--------|-------|-------|-------|-------|-------|-------|
| FOLR1   | 2348  | -2.84 | -1.67 | -3.66  | -0.91 | -1.09 | 0.15  | -2.27 | -0.99 | -0.72 |
| ICAM1   | 3383  | -1.48 | 0.85  | -1.78  | 0.59  | 0.26  | -0.99 | -2.00 | -0.69 | -0.49 |
| ICAM1   | 3383  | 0.98  | -0.22 | -0.33  | -0.29 | 1.35  | -0.01 | 0.00  | 2.02  | 2.49  |
| ICAM1   | 3383  | -1.19 | -0.40 | -0.27  | -1.80 | -0.65 | -0.57 | 0.96  | 0.46  | 1.12  |
| ICAM1   | 3383  | 3.69  | -2.45 | 1.52   | -2.01 | 1.31  | -0.53 | 1.63  | 1.90  | 2.29  |
| IGF2BP2 | 10644 | 0.15  | 2.03  | 0.63   | -0.54 | 0.03  | -1.49 | 2.80  | 1.92  | 1.96  |
| IGF2BP2 | 10644 | -0.11 | -0.39 | -1.03  | -0.62 | 0.36  | 0.36  | 0.06  | -0.20 | -1.27 |
| IGF2BP2 | 10644 | -1.38 | -0.66 | -3.08  | -1.52 | -1.93 | -0.68 | -2.49 | -1.31 | -0.86 |
| IGF2BP2 | 10644 | -1.32 | -0.88 | -1.20  | -0.44 | -0.19 | 0.94  | -0.96 | -0.71 | -1.57 |
| IGF2BP3 | 10643 | -0.10 | -2.10 | -2.45  | -1.64 | 0.81  | -2.27 | -1.42 | -3.77 | -2.42 |
| IGF2BP3 | 10643 | 0.00  | -0.20 | -1.58  | -0.48 | -0.52 | -0.32 | -2.14 | -1.56 | -3.32 |
| IGF2BP3 | 10643 | -0.03 | 0.43  | -3.77  | -1.55 | -2.62 | 0.08  | -1.50 | -1.80 | -2.19 |
| IGF2BP3 | 10643 | 2.44  | 4.00  | -1.94  | 1.16  | -0.50 | -0.18 | 0.51  | 0.50  | -0.28 |
| IMPA2   | 3613  | -0.80 | -1.69 | -0.14  | 3.20  | 0.29  | 1.78  | -3.88 | -1.37 | -3.77 |
| IMPA2   | 3613  | 1.98  | 0.53  | 0.40   | 0.71  | 1.24  | 1.77  | -0.87 | -1.79 | -1.71 |
| IMPA2   | 3613  | -1.05 | 0.36  | -2.91  | -0.72 | -0.40 | 1.11  | -0.27 | 0.45  | -0.55 |
| IMPA2   | 3613  | -1.21 | -1.30 | -2.04  | -2.20 | 0.16  | 0.34  | -1.84 | -0.93 | -2.41 |
| KLF5    | 688   | -1.85 | -0.83 | -3.44  | -1.04 | -0.34 | -0.66 | -1.95 | -6.08 | -2.79 |
| KLF5    | 688   | 0.54  | -0.67 | 1.11   | 0.92  | -0.81 | -0.02 | -0.73 | 0.27  | -0.28 |
| KLF5    | 688   | -0.39 | -0.83 | 1.40   | -1.46 | 0.30  | 2.46  | -1.78 | -0.11 | -0.15 |
| KLF5    | 688   | 0.35  | -2.58 | 0.74   | 0.98  | -1.46 | 1.91  | 0.47  | 0.91  | 1.33  |
| LYN     | 4067  | 0.98  | 2.76  | 0.86   | 0.20  | -0.23 | 0.07  | 0.40  | 0.45  | 0.31  |
| LYN     | 4067  | -0.76 | -0.79 | -2.87  | -2.45 | -0.52 | -1.53 | 2.30  | 2.43  | 1.26  |
| LYN     | 4067  | 2.50  | 0.73  | 0.97   | 0.09  | -0.30 | 0.79  | -0.03 | 0.47  | 3.09  |
| LYN     | 4067  | 1.87  | 1.59  | 1.33   | -1.15 | -0.07 | -0.10 | 1.36  | 2.02  | 2.66  |
| MCM3    | 4172  | 0.40  | -1.10 | -0.89  | -4.01 | -2.52 | -3.94 | -1.55 | -3.13 | -1.32 |
| MCM3    | 4172  | -0.60 | -0.58 | -2.85  | -3.02 | -2.15 | -1.31 | 0.40  | -0.91 | -0.03 |
| MCM3    | 4172  | -3.48 | -6.21 | -10.33 | -2.15 | -1.19 | -3.85 | -2.02 | -1.11 | -0.80 |
| MCM3    | 4172  | 2.71  | 2.58  | 2.33   | 2.06  | -0.72 | 0.41  | 2.15  | 2.51  | 2.65  |
| MCM5    | 4174  | 0.09  | -0.62 | 0.58   | -0.95 | -0.43 | -1.47 | -1.38 | -0.68 | -1.13 |
| MCM5    | 4174  | 1.25  | -0.16 | -0.95  | 0.67  | 0.29  | 0.99  | 2.12  | -0.85 | 0.91  |
| MCM5    | 4174  | -0.18 | -0.83 | -0.23  | -0.67 | 1.55  | 0.96  | 0.44  | -0.08 | -0.08 |
| MCM5    | 4174  | 0.98  | 0.53  | -0.72  | -3.12 | -0.41 | 1.37  | 1.16  | -0.34 | 0.00  |
| MET     | 4233  | 1.54  | 0.69  | -0.24  | -0.21 | -0.03 | -0.55 | -0.42 | -1.77 | -1.57 |

|        |       |       |       |       |       |       |       |       |       |       |
|--------|-------|-------|-------|-------|-------|-------|-------|-------|-------|-------|
| MET    | 4233  | -0.28 | -1.29 | -4.61 | -1.55 | 0.06  | -0.18 | 0.09  | 5.16  | 2.28  |
| MET    | 4233  | -2.66 | -2.58 | -2.81 | -2.81 | -1.64 | -0.96 | -4.62 | -2.83 | -5.30 |
| MET    | 4233  | 0.51  | 0.90  | 0.46  | -3.22 | -1.95 | -1.03 | 0.10  | 1.77  | 0.69  |
| MSN    | 4478  | 0.75  | -1.76 | 0.25  | 1.50  | -1.71 | -0.16 | 0.82  | -1.72 | 1.21  |
| MSN    | 4478  | 0.95  | 0.03  | 0.64  | -1.67 | -0.01 | -0.64 | -0.88 | -0.85 | -1.96 |
| MSN    | 4478  | 0.67  | -0.21 | -0.29 | -1.26 | -1.54 | 1.51  | 0.21  | 0.72  | 0.69  |
| MSN    | 4478  | -2.15 | -0.38 | -1.34 | -2.11 | -0.54 | -0.33 | -3.79 | -3.72 | -4.55 |
| NCK1   | 4690  | 1.63  | 0.34  | 2.55  | -0.35 | -0.34 | -0.85 | -1.25 | -4.23 | -1.33 |
| NCK1   | 4690  | -1.04 | -0.62 | -1.48 | -0.79 | -2.25 | -0.44 | -0.89 | -0.72 | -0.25 |
| NCK1   | 4690  | -0.51 | 0.26  | 0.82  | 0.04  | 0.28  | -0.25 | -1.43 | -0.17 | 0.86  |
| NCK1   | 4690  | -1.59 | -1.11 | -2.03 | -1.42 | -1.60 | -1.93 | 0.15  | 0.25  | 0.41  |
| NDRG1  | 10397 | -0.22 | -1.15 | -1.46 | -0.37 | -1.10 | -0.62 | -0.14 | -0.53 | -0.25 |
| NDRG1  | 10397 | 0.20  | -2.17 | -1.35 | 0.48  | -2.06 | -0.08 | 0.10  | -1.61 | -0.12 |
| NDRG1  | 10397 | 0.08  | 0.63  | 0.18  | -1.41 | -0.34 | -0.83 | 0.30  | -0.05 | -0.37 |
| NDRG1  | 10397 | 0.14  | -0.99 | 1.11  | -0.45 | 0.75  | -0.60 | -1.99 | -0.93 | -2.12 |
| PLCG2  | 5336  | -1.59 | -1.77 | -0.91 | -0.93 | -2.10 | -0.51 | -4.98 | -6.57 | -6.68 |
| PLCG2  | 5336  | 0.66  | 1.24  | 0.59  | -0.64 | 1.04  | -0.48 | 0.16  | -0.36 | 1.43  |
| PLCG2  | 5336  | 0.71  | 1.19  | 2.32  | -0.52 | -0.25 | 0.32  | -1.52 | 0.02  | 0.23  |
| PLCG2  | 5336  | 0.32  | 0.25  | 0.83  | 0.50  | -0.17 | 0.38  | -3.20 | -3.86 | -5.46 |
| PRKDC  | 5591  | -0.33 | -2.08 | -2.54 | -0.15 | -0.37 | -1.89 | -0.27 | 0.06  | -0.65 |
| PRKDC  | 5591  | 0.67  | -3.69 | -1.22 | -0.20 | -0.16 | -1.25 | -1.62 | -0.68 | -1.54 |
| PRKDC  | 5591  | 0.63  | 2.07  | 1.29  | -0.56 | 1.02  | 1.00  | 2.35  | 1.76  | 0.68  |
| PRKDC  | 5591  | 0.72  | 1.67  | 0.74  | -0.59 | -0.29 | -0.55 | -2.32 | -2.61 | -5.50 |
| PRNP   | 5621  | -1.09 | -0.27 | -1.97 | -0.46 | -1.31 | -0.75 | 0.14  | 0.43  | 0.22  |
| PRNP   | 5621  | -1.12 | -0.77 | -2.97 | -0.16 | -1.26 | -0.15 | -3.84 | -4.35 | -5.37 |
| PRNP   | 5621  | -2.11 | -0.45 | -0.66 | -0.81 | -0.33 | -1.51 | -0.69 | -0.13 | 0.20  |
| PRNP   | 5621  | -1.79 | -2.86 | -0.47 | 1.36  | -0.96 | 3.52  | -0.02 | 0.22  | -0.24 |
| S100A1 | 6271  | 1.86  | 1.21  | 2.30  | -0.40 | 0.05  | -0.26 | 1.54  | 1.77  | 1.96  |
| S100A1 | 6271  | 0.01  | 0.59  | 1.33  | 0.45  | 0.38  | -1.12 | -0.97 | -0.62 | -0.24 |
| S100A1 | 6271  | -1.66 | -2.07 | -1.97 | -0.76 | -0.95 | 0.51  | -2.06 | -0.07 | -0.17 |
| S100A1 | 6271  | 0.11  | -1.66 | -1.25 | -1.79 | 0.76  | -0.95 | -1.94 | -0.71 | -1.22 |
| S100B  | 6285  | 1.67  | 1.07  | 1.06  | -1.80 | -0.41 | 0.15  | 0.74  | 0.44  | -7.13 |
| S100B  | 6285  | 0.63  | 0.06  | 1.13  | -2.05 | -0.26 | -1.53 | 1.91  | 2.01  | 2.95  |
| S100B  | 6285  | -0.78 | 1.86  | 0.73  | 0.07  | 0.00  | 0.02  | 1.47  | 0.98  | 2.25  |

|       |       |       |       |       |       |       |       |       |       |       |
|-------|-------|-------|-------|-------|-------|-------|-------|-------|-------|-------|
| S100B | 6285  | -0.94 | -0.11 | -0.36 | -1.28 | -2.53 | -2.86 | -0.17 | 0.10  | -1.19 |
| STK38 | 11329 | 1.83  | 1.83  | 2.36  | 0.19  | -0.52 | 1.74  | 1.11  | 0.16  | 0.33  |
| STK38 | 11329 | 0.74  | -1.19 | -3.92 | -0.12 | -0.20 | -0.50 | -1.66 | -0.79 | -1.66 |
| STK38 | 11329 | -0.30 | 0.16  | -1.43 | -1.20 | 0.14  | -1.43 | -4.68 | -3.37 | -4.84 |
| STK38 | 11329 | 0.66  | 0.64  | 0.39  | -2.33 | 1.64  | 1.64  | 1.11  | 0.11  | 0.82  |
| TGFBI | 7045  | -0.04 | 0.47  | 1.17  | -0.56 | -0.34 | -0.30 | 0.09  | -0.56 | -1.12 |
| TGFBI | 7045  | -1.06 | -0.64 | -4.66 | -1.47 | -0.28 | -1.73 | -0.73 | -0.93 | 0.26  |
| TGFBI | 7045  | 0.12  | -0.17 | -2.15 | -0.45 | -0.98 | -1.22 | -7.21 | -5.96 | -8.54 |
| TGFBI | 7045  | 0.00  | 0.09  | 0.59  | 0.60  | 1.89  | 0.47  | -0.17 | -0.55 | -0.27 |
| UCHL1 | 7345  | -2.01 | -0.52 | -0.61 | -0.62 | -0.02 | -1.12 | -2.42 | -1.90 | -1.06 |
| UCHL1 | 7345  | -1.68 | -1.80 | -2.89 | -2.89 | -3.71 | -3.60 | -2.24 | -2.71 | -0.89 |
| UCHL1 | 7345  | -0.12 | -1.60 | -0.44 | 0.74  | 2.33  | 1.53  | -0.08 | -2.72 | -2.41 |
| UCHL1 | 7345  | -4.07 | -0.41 | -1.55 | -3.54 | -1.15 | -0.10 | -1.88 | -2.15 | -3.19 |
| VCAM1 | 7412  | -0.90 | 0.49  | -3.13 | -0.85 | -0.58 | -1.32 | -1.53 | -2.59 | -2.44 |
| VCAM1 | 7412  | -0.79 | -0.61 | 0.73  | 0.02  | -2.08 | 0.53  | -0.45 | 0.25  | 0.21  |
| VCAM1 | 7412  | 0.94  | 1.88  | 0.57  | 1.49  | 1.10  | 0.69  | 0.70  | 1.29  | 1.34  |
| VCAM1 | 7412  | 2.17  | 2.37  | 2.69  | 1.49  | -0.07 | 0.89  | 2.42  | 2.32  | 2.99  |
| WWTR1 | 25937 | -0.63 | -1.21 | -1.95 | -0.08 | -0.09 | 0.42  | 1.36  | 0.86  | -0.07 |
| WWTR1 | 25937 | -1.32 | -1.42 | -0.19 | -3.27 | -0.20 | -1.58 | 0.32  | -0.85 | 0.71  |
| WWTR1 | 25937 | 4.03  | 1.32  | 1.54  | -0.11 | 0.59  | -0.02 | 1.53  | 1.56  | 1.70  |
| WWTR1 | 25937 | -0.92 | -2.01 | -0.40 | -3.20 | -1.61 | -0.13 | -1.00 | -0.24 | -1.58 |

**siRNA screen data for 40 "driver network member" genes from driver networks**

| Gene name | Entrez.Gene.I d | HER2_AU565 | HER2_AU565 | HER2_AU565 | ER_BT483 | ER_BT483 | ER_BT483 | HER2_SKBr3 | HER2_SKBr3 | HER2_SKBr3 |
|-----------|-----------------|------------|------------|------------|----------|----------|----------|------------|------------|------------|
|           |                 | HER2+      | HER2+      | HER2+      | ER+      | ER+      | ER+      | HER2+      | HER2+      | HER2+      |
| ANXA1     | 301             | -0.10      | 0.15       | -1.43      | -0.24    | -0.16    | -0.23    | -0.89      | 0.07       | 0.07       |
| ANXA1     | 301             | 1.61       | -0.18      | 2.30       | 0.69     | 0.21     | 0.73     | -0.02      | 0.32       | 2.45       |
| ANXA1     | 301             | -1.49      | -0.07      | -1.95      | -0.96    | -0.91    | -1.40    | -1.23      | 3.57       | -2.64      |
| ANXA1     | 301             | -0.55      | 0.37       | -0.69      | -2.67    | -0.32    | -1.69    | 0.34       | -0.27      | 0.21       |
| ATP1B3    | 483             | 1.05       | -0.80      | 1.23       | 0.17     | 0.07     | -0.48    | 2.44       | 0.52       | 0.76       |
| ATP1B3    | 483             | -0.25      | 0.65       | 0.31       | 1.64     | 0.28     | 1.02     | -0.25      | -0.82      | 0.10       |
| ATP1B3    | 483             | -2.02      | -0.92      | -1.30      | -0.37    | -0.43    | 0.74     | -0.53      | -0.06      | -0.85      |
| ATP1B3    | 483             | 2.06       | 0.49       | 2.44       | 1.41     | 0.89     | 1.48     | -0.60      | -0.15      | -1.18      |
| CAV2      | 858             | 0.71       | -0.39      | -0.32      | -2.49    | -1.72    | -2.20    | 1.32       | 2.75       | 1.15       |
| CAV2      | 858             | 0.47       | -0.38      | -0.13      | -0.32    | -1.31    | -0.68    | -0.49      | -0.91      | 0.72       |
| CAV2      | 858             | 2.46       | 0.03       | 2.73       | 1.51     | 0.25     | 0.25     | 0.49       | 2.62       | 1.54       |
| CAV2      | 858             | 0.52       | 0.33       | 1.82       | -0.08    | -0.96    | 0.95     | -1.19      | -0.73      | 0.36       |
| CD44      | 960             | 0.43       | 2.00       | 0.97       | 1.38     | 1.58     | 0.65     | -0.73      | 1.33       | 0.79       |
| CD44      | 960             | -2.33      | -0.08      | -0.22      | -0.89    | -0.81    | -0.12    | 1.92       | 1.02       | 0.27       |
| CD44      | 960             | -0.18      | -0.51      | -0.45      | -0.45    | -0.05    | -0.20    | -0.14      | -0.34      | -0.55      |
| CD44      | 960             | -0.32      | 0.52       | -0.22      | -0.44    | 1.16     | 0.08     | 0.45       | 0.22       | -0.27      |
| CDKN2A    | 1029            | 1.07       | 3.10       | 1.98       | -1.25    | -0.05    | 0.79     | 1.18       | 1.67       | 0.23       |
| CDKN2A    | 1029            | -1.30      | -0.07      | -2.10      | 0.05     | -0.09    | 0.23     | 0.13       | -0.27      | -0.50      |
| CDKN2A    | 1029            | -0.30      | -0.57      | -0.35      | 0.62     | 1.72     | 0.81     | 0.40       | 0.04       | 0.43       |
| CDKN2A    | 1029            | -2.01      | -1.13      | -2.24      | -1.12    | -0.36    | 0.25     | 0.50       | 0.43       | 1.91       |
| ENO1      | 2023            | 0.35       | -1.03      | -0.47      | -3.03    | -3.04    | -2.05    | -0.80      | -0.41      | -0.08      |
| ENO1      | 2023            | -0.38      | -0.30      | -0.05      | 0.15     | 0.09     | -0.06    | 1.12       | 0.13       | 1.61       |
| ENO1      | 2023            | 0.21       | -0.70      | -2.17      | -3.12    | -1.88    | -1.96    | -0.40      | -0.61      | 0.18       |
| ENO1      | 2023            | 0.25       | 0.15       | -0.03      | -0.59    | -0.08    | 0.18     | 0.63       | 0.22       | 0.78       |
| EPB41L2   | 2037            | -0.04      | 0.76       | 0.20       | 0.19     | -1.42    | -0.33    | -0.69      | -0.40      | 0.34       |
| EPB41L2   | 2037            | -0.08      | 0.44       | 0.24       | 0.19     | -0.14    | -0.21    | -0.06      | -0.33      | 0.27       |
| EPB41L2   | 2037            | -4.35      | -4.34      | -4.18      | -0.16    | -1.37    | 0.49     | -2.64      | -3.56      | -2.91      |
| EPB41L2   | 2037            | 2.86       | 1.97       | 4.26       | 1.15     | 2.11     | 0.94     | -0.09      | 0.92       | 1.76       |
| FOLR1     | 2348            | -0.23      | -0.37      | -0.06      | 0.92     | -0.32    | 0.71     | -1.80      | -0.14      | -0.42      |
| FOLR1     | 2348            | 0.31       | -1.50      | -0.44      | 0.42     | -1.43    | -0.29    | -2.04      | 0.94       | 0.01       |
| FOLR1     | 2348            | 1.33       | 0.25       | 1.60       | 0.80     | 0.03     | 0.13     | 1.58       | 2.07       | 1.19       |

|         |       |       |       |       |       |       |       |       |       |       |
|---------|-------|-------|-------|-------|-------|-------|-------|-------|-------|-------|
| FOLR1   | 2348  | -1.54 | -2.05 | -4.08 | -0.43 | -0.79 | -1.14 | -0.10 | -0.90 | -0.97 |
| ICAM1   | 3383  | 0.41  | -0.43 | -1.14 | -0.16 | 0.59  | -0.28 | 1.29  | 2.86  | 1.56  |
| ICAM1   | 3383  | -1.26 | -0.25 | -1.53 | -0.53 | -2.35 | -1.29 | 0.99  | 0.99  | -3.60 |
| ICAM1   | 3383  | -1.28 | -2.32 | -0.99 | 0.05  | 0.27  | -0.13 | 0.89  | -0.06 | 0.49  |
| ICAM1   | 3383  | 3.05  | 3.51  | 1.58  | 1.11  | 0.79  | -1.05 | 0.07  | 0.29  | 2.13  |
| IGF2BP2 | 10644 | -1.28 | 0.31  | 0.16  | -0.28 | -0.57 | -1.39 | 1.08  | -0.06 | 0.63  |
| IGF2BP2 | 10644 | -3.34 | -2.71 | -4.71 | -0.03 | -0.88 | -0.26 | 0.60  | -0.13 | 1.02  |
| IGF2BP2 | 10644 | -0.99 | 0.08  | -1.46 | 0.29  | -0.35 | -0.09 | 0.62  | 0.06  | 0.35  |
| IGF2BP2 | 10644 | 0.50  | -1.30 | -1.24 | -0.17 | 0.33  | -0.17 | 0.52  | 0.69  | 0.39  |
| IGF2BP3 | 10643 | -1.16 | 0.78  | -0.33 | 0.09  | -0.20 | 0.31  | 1.43  | 0.18  | 1.56  |
| IGF2BP3 | 10643 | 0.43  | 0.16  | 1.94  | -0.89 | 0.13  | 0.80  | -0.50 | -1.62 | -1.05 |
| IGF2BP3 | 10643 | 0.19  | -1.81 | -0.64 | 0.04  | 0.89  | 0.59  | 0.54  | -1.36 | 0.19  |
| IGF2BP3 | 10643 | 1.02  | 0.05  | 1.70  | 0.51  | 0.68  | -7.51 | 0.73  | 0.20  | 1.23  |
| IMPA2   | 3613  | 0.34  | 0.46  | 0.11  | -1.39 | -0.57 | -0.06 | 0.47  | -0.03 | 1.48  |
| IMPA2   | 3613  | -1.14 | -2.79 | -0.34 | 0.23  | 0.18  | 0.25  | -0.31 | -0.56 | -0.48 |
| IMPA2   | 3613  | -0.24 | -0.93 | -0.97 | 0.53  | 0.93  | 0.53  | -0.36 | -0.21 | -1.21 |
| IMPA2   | 3613  | -1.50 | -1.39 | -1.49 | -1.50 | -0.59 | -1.39 | 1.59  | -0.32 | 0.13  |
| KLF5    | 688   | -2.53 | -2.26 | -4.65 | 0.31  | -1.02 | -0.05 | 0.10  | -1.31 | -0.67 |
| KLF5    | 688   | 0.83  | 0.44  | 3.79  | 0.23  | -2.21 | 0.46  | 0.88  | 0.92  | 1.06  |
| KLF5    | 688   | -0.40 | -1.14 | 0.10  | -1.19 | -0.97 | -0.94 | 0.40  | 0.12  | 0.13  |
| KLF5    | 688   | 0.16  | 0.92  | 0.17  | -0.33 | 0.05  | 1.11  | 1.39  | 2.21  | 1.16  |
| LYN     | 4067  | 1.22  | 1.80  | 0.19  | -0.30 | 0.46  | 0.61  | -0.70 | -0.09 | 0.24  |
| LYN     | 4067  | -1.67 | -0.72 | -2.52 | 0.37  | 1.21  | 0.49  | 0.60  | -0.59 | 0.02  |
| LYN     | 4067  | 0.45  | 0.58  | 0.35  | 0.06  | -1.80 | 0.24  | -0.22 | -1.21 | -0.04 |
| LYN     | 4067  | 2.87  | 1.98  | 2.13  | 0.62  | 0.67  | 1.84  | 0.06  | 1.74  | 1.67  |
| MCM3    | 4172  | -2.22 | -1.28 | -0.35 | -0.72 | -1.70 | -0.98 | -0.09 | -0.67 | 0.24  |
| MCM3    | 4172  | -2.07 | -0.46 | -2.75 | -0.66 | -2.62 | -0.55 | -0.79 | -1.12 | -2.31 |
| MCM3    | 4172  | -3.34 | -1.80 | -4.82 | -0.12 | -0.15 | -0.09 | -3.30 | -1.75 | -2.60 |
| MCM3    | 4172  | 4.10  | 4.77  | 4.25  | 1.28  | -0.55 | 0.99  | 1.36  | 0.07  | 1.84  |
| MCM5    | 4174  | -0.40 | 0.46  | -1.05 | -1.83 | 0.54  | -0.54 | -2.01 | 1.76  | 0.48  |
| MCM5    | 4174  | 0.88  | 0.88  | 3.39  | 1.76  | 1.71  | 1.23  | 1.65  | 2.14  | 0.28  |
| MCM5    | 4174  | 1.12  | 1.50  | 0.85  | 2.32  | 1.27  | 0.41  | 0.54  | 1.21  | 1.89  |
| MCM5    | 4174  | -0.46 | -2.00 | -0.11 | -0.05 | 0.30  | -0.02 | 0.50  | 1.00  | 0.57  |
| MET     | 4233  | -0.72 | -1.31 | 0.23  | 0.29  | -0.21 | -0.31 | -2.83 | -1.48 | -0.58 |



|        |       |       |       |       |       |       |       |       |       |       |
|--------|-------|-------|-------|-------|-------|-------|-------|-------|-------|-------|
| MET    | 4233  | 0.36  | 1.74  | -0.87 | 1.24  | -0.06 | 0.59  | 0.76  | 0.74  | 0.35  |
| MET    | 4233  | -2.92 | -1.30 | -3.64 | -2.10 | -1.81 | -0.94 | -4.27 | -3.79 | -2.26 |
| MET    | 4233  | -0.92 | 1.08  | -2.13 | -0.55 | -0.10 | -1.61 | -0.45 | -0.15 | -0.13 |
| MSN    | 4478  | -1.53 | 0.34  | 0.45  | 0.15  | 0.48  | -0.02 | -0.11 | 0.64  | 0.64  |
| MSN    | 4478  | 0.65  | 0.47  | 1.92  | -0.21 | 0.90  | 1.24  | 1.40  | 1.49  | 0.60  |
| MSN    | 4478  | -2.89 | -2.06 | -0.71 | 0.09  | 0.63  | -1.32 | 0.43  | 0.58  | 0.82  |
| MSN    | 4478  | -0.15 | -0.12 | -1.04 | -0.08 | -0.17 | -0.95 | 1.25  | 1.51  | -0.31 |
| NCK1   | 4690  | -0.65 | -0.32 | -1.66 | 0.50  | -0.56 | -0.30 | -0.16 | 0.39  | -0.65 |
| NCK1   | 4690  | -0.37 | -0.41 | 0.54  | -1.93 | -2.50 | -1.62 | -0.45 | 0.22  | 0.31  |
| NCK1   | 4690  | -1.61 | 2.80  | 3.92  | -0.02 | 1.82  | -1.29 | -0.05 | -0.54 | 0.06  |
| NCK1   | 4690  | -2.06 | -0.42 | -1.45 | -0.01 | 0.28  | 0.26  | -1.43 | -0.47 | -1.97 |
| NDRG1  | 10397 | 0.16  | 0.52  | 0.33  | -0.81 | -0.28 | 0.48  | -0.46 | 0.17  | 0.06  |
| NDRG1  | 10397 | 0.24  | -0.70 | 0.07  | 0.36  | 0.94  | 0.36  | -0.41 | -0.36 | -0.16 |
| NDRG1  | 10397 | -0.09 | 0.40  | -0.15 | 1.37  | 1.47  | 0.22  | 0.58  | 0.63  | -0.80 |
| NDRG1  | 10397 | -2.55 | -2.66 | -3.81 | 0.53  | 1.12  | -0.09 | -1.32 | -1.05 | -0.21 |
| PLCG2  | 5336  | 0.03  | 0.28  | 0.20  | -0.41 | -0.67 | -1.29 | -0.18 | -0.13 | 1.06  |
| PLCG2  | 5336  | 0.59  | 3.00  | -0.33 | 1.02  | 2.08  | 1.74  | -0.38 | 0.32  | 0.30  |
| PLCG2  | 5336  | -0.54 | 1.64  | -0.47 | -1.51 | -1.45 | -1.38 | 1.13  | 0.00  | 0.94  |
| PLCG2  | 5336  | 1.78  | 0.57  | 2.54  | -0.60 | 0.47  | 0.87  | 0.23  | -0.18 | 0.84  |
| PRKDC  | 5591  | 0.41  | -0.04 | -0.33 | -1.22 | -1.79 | -0.85 | 0.43  | -0.34 | 0.08  |
| PRKDC  | 5591  | 0.42  | -3.52 | -0.41 | 0.36  | 0.13  | 0.96  | 2.20  | 1.88  | 1.78  |
| PRKDC  | 5591  | 0.31  | 1.26  | 0.37  | -0.81 | 1.57  | 0.94  | 3.39  | 1.30  | 0.93  |
| PRKDC  | 5591  | -0.76 | 0.05  | -1.64 | 0.96  | 1.93  | 1.23  | 2.53  | 7.48  | 1.10  |
| PRNP   | 5621  | -0.62 | -0.59 | -1.90 | -1.32 | -1.51 | 0.02  | 1.34  | 0.23  | 0.86  |
| PRNP   | 5621  | -1.44 | 0.11  | -3.75 | -1.73 | -2.10 | -2.39 | 1.10  | 0.69  | 0.56  |
| PRNP   | 5621  | -2.33 | 0.18  | -0.95 | 0.03  | -1.62 | -0.83 | -1.17 | -0.02 | -0.42 |
| PRNP   | 5621  | 0.21  | 2.69  | 1.98  | -0.12 | 0.68  | 0.27  | 0.89  | 0.87  | 0.30  |
| S100A1 | 6271  | 3.43  | 2.02  | 4.07  | -0.32 | -0.51 | 0.18  | 1.97  | 3.29  | 1.71  |
| S100A1 | 6271  | 0.98  | 0.41  | 1.00  | -0.06 | 0.00  | 0.08  | -0.23 | 0.38  | -0.09 |
| S100A1 | 6271  | 0.70  | 1.82  | -0.76 | -0.17 | 0.61  | 1.20  | -0.12 | -0.39 | 0.66  |
| S100A1 | 6271  | -0.66 | -0.66 | -1.16 | -0.55 | -0.07 | -0.22 | -1.50 | -0.69 | -1.17 |
| S100B  | 6285  | -4.97 | -2.69 | -1.93 | 0.02  | 0.07  | 0.44  | 0.42  | 0.44  | 2.06  |
| S100B  | 6285  | 1.21  | 1.01  | 1.41  | 0.04  | -1.43 | 0.74  | 0.44  | -0.95 | 0.28  |
| S100B  | 6285  | 0.53  | 3.14  | 0.79  | 0.08  | -0.88 | -0.49 | 0.33  | -1.36 | -0.29 |

|       |       |       |       |       |       |       |       |       |       |       |
|-------|-------|-------|-------|-------|-------|-------|-------|-------|-------|-------|
| S100B | 6285  | 0.53  | -0.50 | 2.10  | -0.30 | -0.01 | -0.06 | -0.53 | 0.66  | 1.18  |
| STK38 | 11329 | 4.99  | 3.17  | 2.00  | 0.82  | 1.06  | 0.90  | 1.93  | 2.29  | 2.00  |
| STK38 | 11329 | -0.03 | -1.60 | -0.35 | -0.13 | -1.01 | -1.41 | 1.68  | 1.45  | 0.51  |
| STK38 | 11329 | -2.83 | -1.39 | -4.23 | -3.10 | -1.69 | -1.72 | 0.46  | -0.85 | -0.28 |
| STK38 | 11329 | 0.63  | 3.10  | 3.50  | -1.65 | -0.37 | -0.03 | -0.09 | 0.50  | -0.33 |
| TGFBI | 7045  | -0.09 | -0.42 | 0.72  | -0.91 | -1.47 | -1.75 | 0.28  | 2.96  | 1.73  |
| TGFBI | 7045  | -0.79 | -2.38 | -0.57 | -0.03 | -0.54 | -1.12 | 1.87  | 0.02  | 2.36  |
| TGFBI | 7045  | 1.92  | 1.65  | 1.88  | 0.59  | -2.64 | -0.68 | 0.52  | 4.55  | -0.78 |
| TGFBI | 7045  | 2.21  | 1.82  | 1.06  | 0.44  | 0.38  | 0.74  | 1.57  | 1.35  | 1.94  |
| UCHL1 | 7345  | 0.04  | -0.22 | -0.81 | -0.71 | -0.67 | -1.08 | -0.35 | -0.65 | -0.52 |
| UCHL1 | 7345  | -4.73 | -3.53 | -6.77 | -4.39 | -1.70 | -4.29 | -1.48 | -1.60 | -1.39 |
| UCHL1 | 7345  | 0.18  | 0.84  | 0.80  | -1.11 | -1.66 | -2.26 | 0.01  | 0.29  | -0.39 |
| UCHL1 | 7345  | -0.48 | 0.39  | -0.75 | -0.82 | 0.55  | 0.13  | -2.27 | -2.05 | -2.35 |
| VCAM1 | 7412  | -2.32 | -1.43 | -2.38 | -0.97 | -0.30 | -0.69 | -1.73 | -1.25 | -1.77 |
| VCAM1 | 7412  | 0.21  | -0.05 | 0.55  | 0.80  | 1.01  | 0.82  | 0.40  | 1.43  | -0.47 |
| VCAM1 | 7412  | 2.19  | 2.13  | 3.58  | 1.24  | 0.47  | 0.50  | 2.52  | 2.72  | 1.24  |
| VCAM1 | 7412  | 1.37  | 2.72  | 4.79  | 0.67  | 1.32  | 0.78  | 1.01  | 1.76  | 2.01  |
| WWTR1 | 25937 | 1.34  | 1.23  | 3.25  | 1.57  | 0.66  | 1.30  | 1.60  | 0.58  | 2.20  |
| WWTR1 | 25937 | -0.91 | 0.21  | -0.90 | -0.15 | 0.03  | -0.19 | -1.64 | -1.58 | -0.74 |
| WWTR1 | 25937 | 0.31  | 2.96  | 2.90  | -2.73 | 0.40  | 1.30  | 0.73  | 1.66  | 0.88  |
| WWTR1 | 25937 | 0.00  | -0.81 | -1.28 | -0.61 | -2.91 | -2.49 | -1.03 | -0.75 | -1.43 |

**siRNA screen data for 40 "driver network member" genes from driver networks**

| Gene name | Entrez.Gene.I d | ER_ZR751 | ER_ZR751 | ER_ZR751 |
|-----------|-----------------|----------|----------|----------|
|           |                 | ER+      | ER+      | ER+      |
| ANXA1     | 301             | -0.15    | 0.32     | 0.03     |
| ANXA1     | 301             | 1.07     | 0.19     | 0.61     |
| ANXA1     | 301             | 0.08     | -1.87    | -1.85    |
| ANXA1     | 301             | -0.26    | 0.55     | 0.22     |
| ATP1B3    | 483             | 0.86     | -0.05    | -0.05    |
| ATP1B3    | 483             | 1.73     | -0.81    | -0.32    |
| ATP1B3    | 483             | -0.12    | -1.00    | 0.17     |
| ATP1B3    | 483             | 1.82     | 0.63     | 1.58     |
| CAV2      | 858             | -0.08    | 0.49     | -0.89    |
| CAV2      | 858             | -3.60    | -1.30    | -0.03    |
| CAV2      | 858             | 0.41     | 0.13     | 0.47     |
| CAV2      | 858             | 1.50     | 0.44     | 1.47     |
| CD44      | 960             | 0.50     | 1.11     | -0.55    |
| CD44      | 960             | 0.17     | 0.18     | 0.38     |
| CD44      | 960             | 1.36     | 1.61     | 1.52     |
| CD44      | 960             | -0.14    | 1.21     | 0.69     |
| CDKN2A    | 1029            | 0.20     | 1.80     | -0.69    |
| CDKN2A    | 1029            | -0.65    | -0.21    | -0.93    |
| CDKN2A    | 1029            | 0.93     | 1.15     | 1.13     |
| CDKN2A    | 1029            | -0.83    | 0.35     | 0.70     |
| ENO1      | 2023            | 0.45     | -0.72    | -1.06    |
| ENO1      | 2023            | 0.04     | 0.40     | -0.56    |
| ENO1      | 2023            | -0.39    | 0.23     | 0.13     |
| ENO1      | 2023            | 0.50     | -0.32    | 1.24     |
| EPB41L2   | 2037            | 1.60     | -2.48    | 0.69     |
| EPB41L2   | 2037            | -0.49    | -1.25    | 1.07     |
| EPB41L2   | 2037            | 0.18     | -0.78    | -0.43    |
| EPB41L2   | 2037            | 2.50     | 2.41     | 2.66     |
| FOLR1     | 2348            | -0.26    | 0.88     | -0.31    |
| FOLR1     | 2348            | 0.32     | 0.21     | 0.69     |
| FOLR1     | 2348            | 1.49     | 0.96     | 0.57     |

|         |       |       |       |       |
|---------|-------|-------|-------|-------|
| FOLR1   | 2348  | -1.20 | -0.20 | -0.13 |
| ICAM1   | 3383  | -0.96 | 1.12  | 0.75  |
| ICAM1   | 3383  | 0.45  | 0.92  | -0.21 |
| ICAM1   | 3383  | -0.93 | 0.38  | 0.64  |
| ICAM1   | 3383  | 2.44  | 1.67  | 2.09  |
| IGF2BP2 | 10644 | -0.57 | 1.79  | -1.16 |
| IGF2BP2 | 10644 | 0.90  | 1.11  | 1.35  |
| IGF2BP2 | 10644 | 0.21  | 1.42  | -0.31 |
| IGF2BP2 | 10644 | 0.47  | -0.06 | -0.10 |
| IGF2BP3 | 10643 | -0.19 | -0.94 | -0.93 |
| IGF2BP3 | 10643 | -0.39 | -1.06 | -0.02 |
| IGF2BP3 | 10643 | -0.67 | -1.74 | 1.10  |
| IGF2BP3 | 10643 | 0.64  | -0.42 | 1.95  |
| IMPA2   | 3613  | -0.05 | -0.42 | 1.50  |
| IMPA2   | 3613  | 0.88  | 0.53  | 0.96  |
| IMPA2   | 3613  | 1.03  | 0.85  | 1.12  |
| IMPA2   | 3613  | 0.53  | -0.43 | 0.37  |
| KLF5    | 688   | 1.23  | 0.21  | -0.08 |
| KLF5    | 688   | 0.72  | 1.26  | -1.23 |
| KLF5    | 688   | -1.34 | -0.65 | 0.97  |
| KLF5    | 688   | 1.20  | 2.03  | 0.27  |
| LYN     | 4067  | -0.53 | 1.00  | 0.27  |
| LYN     | 4067  | -0.12 | 0.29  | 0.05  |
| LYN     | 4067  | 2.42  | 0.32  | 1.83  |
| LYN     | 4067  | 1.01  | -1.88 | 1.04  |
| MCM3    | 4172  | 0.73  | -0.96 | 0.15  |
| MCM3    | 4172  | -0.45 | 1.36  | -0.38 |
| MCM3    | 4172  | -1.33 | -0.71 | -2.17 |
| MCM3    | 4172  | 1.09  | 1.20  | 2.47  |
| MCM5    | 4174  | -1.12 | 0.44  | -0.52 |
| MCM5    | 4174  | -1.05 | 0.64  | -0.36 |
| MCM5    | 4174  | 0.49  | 0.04  | 0.53  |
| MCM5    | 4174  | 0.59  | 1.33  | 1.47  |
| MET     | 4233  | 0.22  | -0.91 | 0.23  |

|        |       |       |       |       |
|--------|-------|-------|-------|-------|
| MET    | 4233  | 0.66  | 1.46  | -0.68 |
| MET    | 4233  | -2.07 | 0.17  | -0.86 |
| MET    | 4233  | 1.59  | 0.29  | 0.35  |
| MSN    | 4478  | 0.51  | -0.82 | 0.20  |
| MSN    | 4478  | -0.42 | -1.40 | -0.14 |
| MSN    | 4478  | 0.06  | 0.23  | 1.22  |
| MSN    | 4478  | -0.29 | -0.26 | 1.05  |
| NCK1   | 4690  | 0.29  | -0.67 | -1.38 |
| NCK1   | 4690  | -0.18 | 0.16  | -0.02 |
| NCK1   | 4690  | -0.94 | -0.12 | 0.97  |
| NCK1   | 4690  | -0.89 | -0.46 | -0.36 |
| NDRG1  | 10397 | -0.94 | -2.85 | -0.74 |
| NDRG1  | 10397 | -1.94 | -2.93 | 0.37  |
| NDRG1  | 10397 | 0.60  | -0.14 | 0.82  |
| NDRG1  | 10397 | -0.02 | -0.77 | 0.49  |
| PLCG2  | 5336  | 0.08  | -1.59 | -0.45 |
| PLCG2  | 5336  | 0.43  | 1.17  | -0.15 |
| PLCG2  | 5336  | 0.51  | 1.18  | 0.35  |
| PLCG2  | 5336  | 1.40  | -0.85 | 0.58  |
| PRKDC  | 5591  | 0.42  | -1.05 | -0.16 |
| PRKDC  | 5591  | 1.23  | 0.04  | 1.47  |
| PRKDC  | 5591  | 0.81  | 1.32  | 1.15  |
| PRKDC  | 5591  | 0.98  | 0.99  | 0.26  |
| PRNP   | 5621  | 0.72  | 0.35  | -0.40 |
| PRNP   | 5621  | -0.32 | -0.62 | -0.63 |
| PRNP   | 5621  | 0.73  | -0.33 | -0.02 |
| PRNP   | 5621  | 0.18  | 1.60  | 0.20  |
| S100A1 | 6271  | 2.04  | 1.49  | 1.84  |
| S100A1 | 6271  | 1.33  | 0.49  | 0.06  |
| S100A1 | 6271  | -0.27 | 1.06  | -0.38 |
| S100A1 | 6271  | 0.63  | -1.00 | -0.28 |
| S100B  | 6285  | 0.09  | -1.49 | 1.35  |
| S100B  | 6285  | 1.79  | 1.18  | -0.03 |
| S100B  | 6285  | -0.27 | 0.34  | -0.03 |

|       |       |       |       |       |
|-------|-------|-------|-------|-------|
| S100B | 6285  | 0.29  | 0.80  | 0.47  |
| STK38 | 11329 | 3.68  | 0.28  | 0.20  |
| STK38 | 11329 | 0.49  | -0.67 | 0.02  |
| STK38 | 11329 | -0.68 | 1.12  | -0.24 |
| STK38 | 11329 | -0.73 | 1.85  | 0.74  |
| TGFBI | 7045  | -0.45 | 0.10  | -0.83 |
| TGFBI | 7045  | 0.09  | -0.16 | -0.06 |
| TGFBI | 7045  | -0.55 | 0.83  | -0.63 |
| TGFBI | 7045  | 1.30  | 0.32  | 0.44  |
| UCHL1 | 7345  | 0.86  | -0.17 | 0.98  |
| UCHL1 | 7345  | -2.37 | -1.65 | -1.79 |
| UCHL1 | 7345  | -0.29 | -0.29 | -0.58 |
| UCHL1 | 7345  | -1.16 | -0.94 | -0.13 |
| VCAM1 | 7412  | 0.20  | -1.66 | -0.72 |
| VCAM1 | 7412  | -0.22 | 0.31  | -0.12 |
| VCAM1 | 7412  | 1.18  | 1.88  | 0.52  |
| VCAM1 | 7412  | 1.29  | 0.79  | 2.70  |
| WWTR1 | 25937 | 0.52  | -1.31 | 1.43  |
| WWTR1 | 25937 | -0.28 | -1.91 | -0.68 |
| WWTR1 | 25937 | 1.14  | -0.12 | 1.31  |
| WWTR1 | 25937 | -1.16 | 0.04  | -0.01 |
