# Supplementary material for: A network-based, integrative study to identify core biological pathways that drive breast cancer clinical subtypes
Source: PubMed Central journal article supplement (PMC3304402; doi:10.1038/bjc.2011.584), 2012-02-16
Supplement: bjc2011584x8.pdf [file bjc2011584x8.pdf]

**Differentially expressed genes for ER+ subtype from Chin et al.**

Gene ID      Frequency of appearance in the differentially expressed gene list from resampling (min = 0, max = 1, cutoff = 0.5)

|      |      |
|------|------|
| 9    | 1.00 |
| 12   | 0.99 |
| 36   | 0.80 |
| 115  | 1.00 |
| 164  | 1.00 |
| 210  | 0.78 |
| 222  | 0.63 |
| 323  | 0.91 |
| 367  | 1.00 |
| 374  | 0.93 |
| 377  | 1.00 |
| 388  | 1.00 |
| 403  | 0.64 |
| 517  | 0.93 |
| 563  | 0.87 |
| 576  | 0.71 |
| 585  | 0.51 |
| 596  | 1.00 |
| 644  | 0.64 |
| 689  | 1.00 |
| 720  | 1.00 |
| 721  | 1.00 |
| 771  | 1.00 |
| 776  | 1.00 |
| 901  | 0.68 |
| 987  | 1.00 |
| 1101 | 0.69 |
| 1287 | 0.53 |
| 1311 | 0.79 |
| 1359 | 0.80 |
| 1360 | 1.00 |
| 1382 | 0.52 |
| 1396 | 1.00 |
| 1471 | 0.76 |
| 1528 | 0.99 |
| 1555 | 1.00 |
| 1556 | 1.00 |
| 1580 | 0.57 |
| 1602 | 1.00 |
| 1725 | 0.50 |

|      |      |
|------|------|
| 1846 | 1.00 |
| 1917 | 1.00 |
| 1955 | 0.74 |
| 2065 | 1.00 |
| 2099 | 1.00 |
| 2166 | 0.87 |
| 2203 | 1.00 |
| 2593 | 0.82 |
| 2625 | 1.00 |
| 2752 | 0.52 |
| 2800 | 0.51 |
| 2922 | 0.77 |
| 2947 | 1.00 |
| 3029 | 0.98 |
| 3169 | 1.00 |
| 3212 | 1.00 |
| 3226 | 0.71 |
| 3249 | 0.99 |
| 3295 | 0.53 |
| 3315 | 0.76 |
| 3480 | 1.00 |
| 3485 | 0.98 |
| 3572 | 0.83 |
| 3667 | 0.72 |
| 3693 | 0.66 |
| 3800 | 0.87 |
| 3875 | 1.00 |
| 4059 | 0.90 |
| 4137 | 1.00 |
| 4250 | 1.00 |
| 4602 | 1.00 |
| 4680 | 0.99 |
| 4832 | 1.00 |
| 4886 | 1.00 |
| 5046 | 0.78 |
| 5104 | 0.97 |
| 5167 | 0.93 |
| 5174 | 0.56 |
| 5304 | 0.91 |
| 5327 | 0.94 |
| 5507 | 1.00 |
| 5914 | 0.98 |
| 5979 | 0.76 |
| 6337 | 1.00 |
| 6451 | 0.81 |
| 6505 | 0.79 |
| 6584 | 1.00 |

|       |      |
|-------|------|
| 6659  | 0.96 |
| 6697  | 0.53 |
| 6922  | 1.00 |
| 6926  | 1.00 |
| 7009  | 0.81 |
| 7021  | 0.71 |
| 7031  | 1.00 |
| 7033  | 1.00 |
| 7078  | 0.68 |
| 7162  | 1.00 |
| 7357  | 0.79 |
| 7466  | 1.00 |
| 7494  | 1.00 |
| 7507  | 0.80 |
| 7802  | 1.00 |
| 7832  | 0.91 |
| 7844  | 1.00 |
| 7869  | 0.99 |
| 8309  | 1.00 |
| 8382  | 0.85 |
| 8416  | 1.00 |
| 8576  | 0.78 |
| 8614  | 1.00 |
| 8786  | 0.96 |
| 8821  | 1.00 |
| 9052  | 0.82 |
| 9338  | 1.00 |
| 9368  | 0.64 |
| 9501  | 0.60 |
| 9518  | 0.98 |
| 9620  | 1.00 |
| 9633  | 1.00 |
| 9649  | 1.00 |
| 9658  | 0.99 |
| 9687  | 1.00 |
| 9742  | 0.99 |
| 9743  | 0.55 |
| 10040 | 0.87 |
| 10103 | 1.00 |
| 10229 | 0.55 |
| 10234 | 1.00 |
| 10439 | 0.77 |
| 10451 | 1.00 |
| 10512 | 0.89 |
| 10529 | 0.55 |
| 10548 | 0.55 |
| 10551 | 1.00 |

|       |      |
|-------|------|
| 10560 | 0.97 |
| 10641 | 0.85 |
| 10647 | 0.98 |
| 10916 | 1.00 |
| 10935 | 0.51 |
| 10974 | 0.87 |
| 11042 | 0.90 |
| 11059 | 1.00 |
| 11145 | 1.00 |
| 11226 | 1.00 |
| 22796 | 0.77 |
| 22836 | 0.70 |
| 22977 | 0.85 |
| 22996 | 1.00 |
| 23030 | 1.00 |
| 23116 | 0.61 |
| 23158 | 1.00 |
| 23171 | 0.66 |
| 23263 | 0.69 |
| 23362 | 0.97 |
| 23428 | 1.00 |
| 23639 | 0.60 |
| 25800 | 1.00 |
| 25803 | 1.00 |
| 25837 | 0.98 |
| 27134 | 1.00 |
| 27324 | 0.95 |
| 29956 | 0.98 |
| 50810 | 0.61 |
| 51097 | 1.00 |
| 51133 | 0.98 |
| 51322 | 0.79 |
| 51340 | 0.94 |
| 51363 | 0.55 |
| 51380 | 0.63 |
| 51466 | 0.95 |
| 51477 | 0.77 |
| 51604 | 0.94 |
| 51760 | 0.81 |
| 51809 | 1.00 |
| 54458 | 0.95 |
| 54463 | 0.99 |
| 54502 | 1.00 |
| 54585 | 0.58 |
| 54837 | 1.00 |
| 54847 | 0.99 |
| 54898 | 1.00 |

|       |      |
|-------|------|
| 54961 | 0.90 |
| 55358 | 0.80 |
| 55450 | 1.00 |
| 55638 | 0.99 |
| 55686 | 1.00 |
| 55733 | 1.00 |
| 55793 | 1.00 |
| 55837 | 0.70 |
| 55861 | 0.59 |
| 56521 | 1.00 |
| 56904 | 0.94 |
| 57416 | 1.00 |
| 57496 | 1.00 |
| 57535 | 0.89 |
| 57613 | 1.00 |
| 57728 | 0.63 |
| 57758 | 1.00 |
| 57763 | 0.82 |
| 60481 | 0.93 |
| 63941 | 0.99 |
| 64084 | 1.00 |
| 64087 | 1.00 |
| 64284 | 0.82 |
| 64847 | 0.62 |
| 65055 | 0.74 |
| 79006 | 0.90 |
| 79083 | 1.00 |
| 79178 | 0.92 |
| 79600 | 1.00 |
| 79603 | 1.00 |
| 79624 | 1.00 |
| 79641 | 0.77 |
| 79702 | 1.00 |
| 79838 | 1.00 |
| 79846 | 0.65 |
| 79921 | 0.96 |
| 80127 | 0.99 |
| 80129 | 0.56 |
| 80736 | 1.00 |
| 81031 | 0.97 |
| 84745 | 0.91 |
| 89927 | 0.88 |
| 90355 | 1.00 |

**Differentially expressed genes for  
HER2+ subtype from Chin et al.**

Gene ID    Frequency of appearance in the  
differentially expressed gene list  
from resampling (min = 0, max =  
1, cutoff = 0.5)

|      |      |
|------|------|
| 15   | 0.65 |
| 43   | 0.59 |
| 133  | 0.72 |
| 183  | 0.71 |
| 208  | 0.53 |
| 244  | 1.00 |
| 247  | 0.70 |
| 489  | 0.58 |
| 667  | 0.65 |
| 677  | 0.55 |
| 785  | 0.54 |
| 909  | 0.62 |
| 917  | 0.50 |
| 1000 | 0.60 |
| 1001 | 0.95 |
| 1004 | 0.58 |
| 1043 | 0.64 |
| 1087 | 0.60 |
| 1130 | 0.53 |
| 1159 | 1.00 |
| 1191 | 0.70 |
| 1285 | 0.82 |
| 1305 | 0.71 |
| 1384 | 0.97 |
| 1474 | 1.00 |
| 1525 | 0.51 |
| 1672 | 1.00 |
| 1755 | 0.53 |
| 1824 | 0.50 |
| 1846 | 1.00 |
| 1848 | 0.77 |
| 1951 | 0.97 |
| 1953 | 0.75 |
| 2064 | 1.00 |
| 2201 | 0.72 |
| 2264 | 1.00 |
| 2334 | 0.67 |
| 2525 | 0.58 |
| 2537 | 0.72 |

|      |      |
|------|------|
| 2568 | 0.86 |
| 2591 | 0.71 |
| 2675 | 0.63 |
| 2742 | 0.98 |
| 2867 | 0.53 |
| 2886 | 1.00 |
| 3091 | 0.72 |
| 3126 | 0.62 |
| 3216 | 0.57 |
| 3237 | 0.53 |
| 3263 | 0.96 |
| 3269 | 0.51 |
| 3320 | 0.99 |
| 3429 | 0.70 |
| 3434 | 0.51 |
| 3447 | 0.52 |
| 3622 | 0.73 |
| 3669 | 0.62 |
| 3783 | 0.66 |
| 3846 | 0.70 |
| 3854 | 0.73 |
| 3855 | 0.64 |
| 3861 | 0.67 |
| 3866 | 0.51 |
| 3872 | 1.00 |
| 3887 | 0.71 |
| 3929 | 0.77 |
| 4082 | 0.99 |
| 4199 | 0.77 |
| 4246 | 0.95 |
| 4249 | 0.61 |
| 4250 | 1.00 |
| 4281 | 0.68 |
| 4312 | 0.99 |
| 4316 | 1.00 |
| 4586 | 0.71 |
| 4587 | 0.72 |
| 4588 | 0.53 |
| 4680 | 0.96 |
| 4761 | 0.71 |
| 4938 | 0.69 |
| 4974 | 0.73 |
| 4988 | 0.60 |
| 5140 | 0.60 |
| 5178 | 0.72 |
| 5304 | 0.70 |
| 5307 | 0.57 |

|      |      |
|------|------|
| 5409 | 1.00 |
| 5460 | 0.53 |
| 5502 | 0.82 |
| 5600 | 0.59 |
| 5625 | 1.00 |
| 5691 | 0.52 |
| 5697 | 0.72 |
| 5709 | 1.00 |
| 5745 | 0.63 |
| 5764 | 0.71 |
| 5790 | 0.72 |
| 5898 | 0.73 |
| 5918 | 0.81 |
| 6196 | 0.54 |
| 6238 | 0.91 |
| 6273 | 0.72 |
| 6278 | 1.00 |
| 6279 | 1.00 |
| 6280 | 1.00 |
| 6286 | 0.62 |
| 6332 | 0.54 |
| 6352 | 0.62 |
| 6372 | 0.66 |
| 6550 | 0.58 |
| 6558 | 0.89 |
| 6590 | 0.95 |
| 6599 | 0.69 |
| 6664 | 1.00 |
| 6752 | 0.68 |
| 6965 | 0.70 |
| 7007 | 0.54 |
| 7021 | 1.00 |
| 7033 | 1.00 |
| 7067 | 1.00 |
| 7258 | 0.72 |
| 7262 | 0.55 |
| 7264 | 0.79 |
| 7703 | 0.59 |
| 7782 | 0.62 |
| 8309 | 0.69 |
| 8396 | 0.55 |
| 8496 | 0.54 |
| 8537 | 0.70 |
| 8557 | 0.97 |
| 8564 | 1.00 |
| 8626 | 0.68 |
| 8638 | 0.68 |



|       |      |
|-------|------|
| 8842  | 0.97 |
| 8909  | 0.54 |
| 8997  | 0.61 |
| 9022  | 0.72 |
| 9060  | 1.00 |
| 9168  | 0.63 |
| 9210  | 0.70 |
| 9220  | 0.71 |
| 9248  | 1.00 |
| 9334  | 0.70 |
| 9415  | 1.00 |
| 9480  | 0.62 |
| 9572  | 0.69 |
| 9635  | 1.00 |
| 9636  | 0.72 |
| 9669  | 0.54 |
| 9749  | 0.89 |
| 9751  | 0.71 |
| 9862  | 1.00 |
| 10125 | 0.60 |
| 10200 | 0.62 |
| 10249 | 0.84 |
| 10321 | 0.77 |
| 10487 | 0.99 |
| 10587 | 0.73 |
| 10647 | 1.00 |
| 10686 | 0.70 |
| 10749 | 0.70 |
| 10948 | 1.00 |
| 11013 | 0.79 |
| 11042 | 0.51 |
| 22794 | 0.73 |
| 22943 | 0.71 |
| 23017 | 0.85 |
| 23034 | 0.70 |
| 23037 | 0.73 |
| 23075 | 0.84 |
| 23293 | 0.81 |
| 23326 | 0.50 |
| 23475 | 0.98 |
| 23591 | 0.63 |
| 23650 | 0.78 |
| 25803 | 0.81 |
| 26045 | 0.51 |
| 26118 | 0.71 |
| 26136 | 0.66 |
| 26499 | 0.95 |

|        |      |
|--------|------|
| 26576  | 0.72 |
| 27074  | 0.57 |
| 29053  | 0.58 |
| 29091  | 0.73 |
| 30850  | 0.70 |
| 51685  | 0.58 |
| 51806  | 1.00 |
| 51809  | 0.69 |
| 54531  | 0.50 |
| 54544  | 0.63 |
| 54798  | 0.65 |
| 54869  | 0.56 |
| 54883  | 0.57 |
| 54972  | 0.61 |
| 55008  | 0.81 |
| 55287  | 0.64 |
| 55568  | 0.76 |
| 55738  | 0.62 |
| 55852  | 0.55 |
| 55876  | 1.00 |
| 57490  | 0.54 |
| 64816  | 0.56 |
| 64922  | 0.55 |
| 65055  | 0.71 |
| 79152  | 1.00 |
| 79412  | 0.94 |
| 79615  | 0.72 |
| 79762  | 0.62 |
| 79802  | 0.71 |
| 79820  | 0.60 |
| 79919  | 0.95 |
| 80156  | 0.77 |
| 83481  | 0.70 |
| 84227  | 0.66 |
| 91543  | 0.70 |
| 93210  | 1.00 |
| 94009  | 1.00 |
| 112399 | 0.55 |
| 154796 | 0.55 |

**Differentially expressed genes for  
TN subtype from Chin et al.**

Gene ID    Frequency of appearance in  
the differentially expressed  
gene list from resampling  
(min = 0, max = 1, cutoff =  
0.5)

|      |      |
|------|------|
| 244  | 1.00 |
| 262  | 1.00 |
| 330  | 0.72 |
| 419  | 0.89 |
| 483  | 0.76 |
| 688  | 0.99 |
| 864  | 1.00 |
| 898  | 0.74 |
| 991  | 1.00 |
| 1001 | 1.00 |
| 1029 | 0.93 |
| 1054 | 0.94 |
| 1116 | 1.00 |
| 1117 | 1.00 |
| 1381 | 1.00 |
| 1410 | 1.00 |
| 1439 | 1.00 |
| 1466 | 0.71 |
| 1475 | 0.98 |
| 1503 | 0.56 |
| 1515 | 0.81 |
| 1825 | 0.97 |
| 1830 | 0.63 |
| 1871 | 0.76 |
| 1956 | 1.00 |
| 2001 | 1.00 |
| 2019 | 1.00 |
| 2023 | 0.82 |
| 2049 | 0.97 |
| 2051 | 0.76 |
| 2120 | 1.00 |
| 2173 | 1.00 |
| 2175 | 0.65 |
| 2178 | 0.63 |
| 2348 | 0.92 |
| 2564 | 0.55 |
| 2568 | 1.00 |

|      |      |
|------|------|
| 2633 | 0.88 |
| 2824 | 1.00 |
| 2921 | 0.56 |
| 2950 | 0.79 |
| 3112 | 0.61 |
| 3117 | 1.00 |
| 3126 | 0.57 |
| 3159 | 1.00 |
| 3303 | 0.94 |
| 3383 | 0.67 |
| 3400 | 1.00 |
| 3455 | 1.00 |
| 3502 | 1.00 |
| 3507 | 0.95 |
| 3514 | 1.00 |
| 3575 | 0.84 |
| 3595 | 0.74 |
| 3613 | 0.95 |
| 3620 | 0.78 |
| 3627 | 0.84 |
| 3755 | 0.81 |
| 3783 | 0.97 |
| 3852 | 1.00 |
| 3854 | 1.00 |
| 3861 | 0.99 |
| 3866 | 1.00 |
| 3868 | 1.00 |
| 3872 | 1.00 |
| 3914 | 0.59 |
| 3930 | 0.86 |
| 3934 | 0.82 |
| 3945 | 1.00 |
| 4050 | 0.71 |
| 4065 | 0.71 |
| 4067 | 1.00 |
| 4071 | 0.85 |
| 4162 | 1.00 |
| 4166 | 0.99 |
| 4172 | 0.59 |
| 4174 | 1.00 |
| 4233 | 0.62 |
| 4240 | 0.67 |
| 4281 | 1.00 |
| 4283 | 1.00 |
| 4312 | 1.00 |
| 4316 | 1.00 |
| 4318 | 0.97 |

|      |      |
|------|------|
| 4321 | 0.98 |
| 4478 | 0.91 |
| 4603 | 1.00 |
| 4687 | 0.59 |
| 4690 | 0.73 |
| 4771 | 0.84 |
| 4781 | 1.00 |
| 4794 | 0.88 |
| 4904 | 0.96 |
| 4953 | 1.00 |
| 5268 | 1.00 |
| 5321 | 1.00 |
| 5332 | 1.00 |
| 5336 | 0.99 |
| 5450 | 1.00 |
| 5613 | 1.00 |
| 5621 | 0.65 |
| 5788 | 0.56 |
| 5806 | 0.96 |
| 5918 | 1.00 |
| 5971 | 0.85 |
| 6271 | 0.94 |
| 6273 | 0.62 |
| 6285 | 1.00 |
| 6289 | 0.67 |
| 6305 | 0.93 |
| 6352 | 1.00 |
| 6362 | 0.94 |
| 6363 | 0.92 |
| 6422 | 1.00 |
| 6489 | 0.76 |
| 6590 | 0.97 |
| 6648 | 1.00 |
| 6663 | 1.00 |
| 6850 | 0.77 |
| 7039 | 0.86 |
| 7345 | 0.69 |
| 7368 | 1.00 |
| 7412 | 0.84 |
| 7525 | 0.66 |
| 7545 | 1.00 |
| 7913 | 0.76 |
| 8140 | 0.90 |
| 8190 | 1.00 |
| 8317 | 0.86 |
| 8543 | 1.00 |
| 8566 | 0.79 |

|       |      |
|-------|------|
| 8645  | 1.00 |
| 8685  | 0.73 |
| 8690  | 0.98 |
| 8836  | 0.69 |
| 8842  | 1.00 |
| 9061  | 0.71 |
| 9095  | 1.00 |
| 9200  | 0.60 |
| 9235  | 0.92 |
| 9319  | 0.76 |
| 9435  | 1.00 |
| 9466  | 0.53 |
| 9469  | 1.00 |
| 9568  | 0.57 |
| 9582  | 1.00 |
| 9654  | 0.89 |
| 9688  | 0.64 |
| 9806  | 1.00 |
| 10155 | 1.00 |
| 10232 | 0.98 |
| 10397 | 0.94 |
| 10402 | 0.71 |
| 10479 | 0.70 |
| 10537 | 1.00 |
| 10563 | 1.00 |
| 10568 | 0.63 |
| 10625 | 0.61 |
| 10643 | 1.00 |
| 10644 | 0.65 |
| 10659 | 0.54 |
| 10892 | 0.84 |
| 10950 | 0.99 |
| 11013 | 0.83 |
| 11135 | 0.80 |
| 11329 | 0.98 |
| 11341 | 0.98 |
| 22808 | 0.99 |
| 22822 | 0.77 |
| 23175 | 1.00 |
| 23229 | 0.91 |
| 23231 | 1.00 |
| 23321 | 1.00 |
| 23424 | 0.90 |
| 23650 | 1.00 |
| 23683 | 0.99 |
| 25907 | 0.98 |
| 25937 | 0.94 |

|       |      |
|-------|------|
| 25984 | 1.00 |
| 26031 | 0.90 |
| 26227 | 0.99 |
| 27074 | 1.00 |
| 27299 | 1.00 |
| 28831 | 0.97 |
| 29015 | 1.00 |
| 29842 | 0.69 |
| 29968 | 0.99 |
| 29970 | 0.82 |
| 51026 | 0.96 |
| 51237 | 0.51 |
| 51312 | 0.86 |
| 51442 | 1.00 |
| 51704 | 0.93 |
| 51806 | 1.00 |
| 53335 | 1.00 |
| 54149 | 0.99 |
| 54535 | 0.96 |
| 54763 | 1.00 |
| 54781 | 0.89 |
| 55003 | 0.90 |
| 55765 | 0.55 |
| 55816 | 0.73 |
| 55872 | 0.58 |
| 56603 | 0.74 |
| 56833 | 0.88 |
| 56935 | 1.00 |
| 57110 | 0.53 |
| 57348 | 1.00 |
| 58473 | 0.64 |
| 58528 | 0.89 |
| 60683 | 0.92 |
| 64771 | 0.91 |
| 79098 | 0.99 |
| 79627 | 1.00 |
| 79817 | 0.97 |
| 80183 | 0.54 |
| 81553 | 0.99 |
| 81611 | 0.99 |
| 81618 | 0.69 |
| 83439 | 1.00 |
| 84535 | 0.90 |
| 84752 | 0.66 |
| 85377 | 1.00 |
| 85453 | 0.86 |
| 94025 | 1.00 |

140885

0.68



**Differentially expressed genes for  
ER+ subtype from Andre et al.**

Gene ID    Frequency of appearance in the  
differentially expressed gene list  
from resampling (min = 0, max =  
1, cutoff = 0.5)

|      |      |
|------|------|
| 9    | 1.00 |
| 12   | 0.94 |
| 18   | 0.84 |
| 36   | 0.95 |
| 115  | 0.97 |
| 164  | 1.00 |
| 214  | 0.98 |
| 222  | 0.98 |
| 323  | 1.00 |
| 367  | 1.00 |
| 373  | 0.66 |
| 374  | 1.00 |
| 377  | 0.97 |
| 388  | 1.00 |
| 403  | 0.97 |
| 585  | 0.60 |
| 595  | 1.00 |
| 596  | 0.58 |
| 598  | 1.00 |
| 689  | 0.53 |
| 720  | 0.99 |
| 721  | 0.98 |
| 771  | 1.00 |
| 819  | 0.93 |
| 987  | 0.77 |
| 1101 | 0.86 |
| 1311 | 0.91 |
| 1345 | 0.99 |
| 1360 | 0.60 |
| 1363 | 0.66 |
| 1396 | 1.00 |
| 1471 | 0.88 |
| 1528 | 0.96 |
| 1555 | 1.00 |
| 1556 | 1.00 |
| 1580 | 1.00 |
| 1602 | 1.00 |
| 1728 | 0.96 |
| 1846 | 0.89 |
| 1917 | 0.99 |

|      |      |
|------|------|
| 1952 | 0.89 |
| 1955 | 0.90 |
| 2065 | 0.98 |
| 2099 | 1.00 |
| 2166 | 1.00 |
| 2263 | 0.54 |
| 2268 | 0.82 |
| 2593 | 1.00 |
| 2625 | 1.00 |
| 2647 | 0.72 |
| 2674 | 0.99 |
| 2697 | 0.94 |
| 2743 | 1.00 |
| 2752 | 0.92 |
| 2804 | 0.60 |
| 2952 | 0.96 |
| 3081 | 1.00 |
| 3169 | 1.00 |
| 3480 | 1.00 |
| 3485 | 0.95 |
| 3487 | 1.00 |
| 3551 | 0.86 |
| 3572 | 1.00 |
| 3642 | 0.54 |
| 3667 | 0.99 |
| 3693 | 0.70 |
| 3875 | 0.81 |
| 3899 | 1.00 |
| 3909 | 0.70 |
| 3964 | 1.00 |
| 4059 | 0.99 |
| 4137 | 1.00 |
| 4179 | 1.00 |
| 4246 | 1.00 |
| 4250 | 1.00 |
| 4254 | 0.57 |
| 4582 | 0.93 |
| 4602 | 0.79 |
| 4646 | 0.98 |
| 4680 | 0.80 |
| 4886 | 0.99 |
| 5002 | 0.86 |
| 5025 | 0.99 |
| 5104 | 1.00 |
| 5167 | 1.00 |
| 5174 | 0.95 |
| 5241 | 0.97 |

|      |      |
|------|------|
| 5304 | 1.00 |
| 5327 | 0.94 |
| 5364 | 0.99 |
| 5441 | 0.56 |
| 5525 | 0.92 |
| 5538 | 0.99 |
| 5733 | 0.65 |
| 5914 | 0.76 |
| 5979 | 1.00 |
| 6038 | 0.75 |
| 6319 | 0.98 |
| 6337 | 1.00 |
| 6405 | 0.97 |
| 6500 | 0.99 |
| 6542 | 1.00 |
| 6604 | 0.54 |
| 6659 | 0.61 |
| 6922 | 1.00 |
| 6926 | 0.99 |
| 7009 | 1.00 |
| 7021 | 0.81 |
| 7031 | 1.00 |
| 7033 | 1.00 |
| 7090 | 0.84 |
| 7157 | 0.82 |
| 7162 | 1.00 |
| 7257 | 0.58 |
| 7320 | 1.00 |
| 7357 | 1.00 |
| 7494 | 1.00 |
| 7572 | 0.62 |
| 7593 | 0.93 |
| 7802 | 1.00 |
| 7844 | 0.78 |
| 7869 | 1.00 |
| 7905 | 0.97 |
| 8073 | 0.62 |
| 8228 | 0.70 |
| 8363 | 0.84 |
| 8405 | 0.66 |
| 8416 | 1.00 |
| 8553 | 0.50 |
| 8614 | 1.00 |
| 8678 | 1.00 |
| 8722 | 0.96 |
| 8794 | 0.53 |
| 8821 | 0.98 |

|       |      |
|-------|------|
| 8996  | 0.68 |
| 9052  | 0.84 |
| 9120  | 1.00 |
| 9135  | 1.00 |
| 9187  | 0.60 |
| 9254  | 0.75 |
| 9338  | 0.98 |
| 9498  | 0.58 |
| 9518  | 0.96 |
| 9620  | 0.98 |
| 9674  | 1.00 |
| 9687  | 1.00 |
| 9778  | 1.00 |
| 9802  | 0.76 |
| 9915  | 0.76 |
| 10103 | 1.00 |
| 10202 | 0.63 |
| 10324 | 0.75 |
| 10439 | 1.00 |
| 10451 | 1.00 |
| 10512 | 0.80 |
| 10551 | 1.00 |
| 10560 | 0.62 |
| 10610 | 0.57 |
| 10614 | 0.54 |
| 10647 | 1.00 |
| 10677 | 0.86 |
| 10847 | 0.52 |
| 10916 | 1.00 |
| 10965 | 0.63 |
| 10974 | 1.00 |
| 11030 | 0.85 |
| 11042 | 1.00 |
| 11059 | 0.94 |
| 11160 | 0.52 |
| 11226 | 0.74 |
| 22885 | 0.99 |
| 22906 | 0.75 |
| 22924 | 0.84 |
| 22977 | 0.99 |
| 22996 | 1.00 |
| 23027 | 0.51 |
| 23030 | 0.94 |
| 23158 | 1.00 |
| 23389 | 1.00 |
| 23428 | 1.00 |
| 23528 | 0.97 |

|       |      |
|-------|------|
| 25800 | 1.00 |
| 25803 | 0.99 |
| 25992 | 0.65 |
| 26018 | 0.58 |
| 26234 | 0.95 |
| 27075 | 1.00 |
| 27134 | 1.00 |
| 27324 | 0.71 |
| 28958 | 0.87 |
| 29956 | 1.00 |
| 51097 | 1.00 |
| 51133 | 0.97 |
| 51313 | 0.99 |
| 51322 | 0.74 |
| 51340 | 0.96 |
| 51363 | 0.57 |
| 51364 | 1.00 |
| 51380 | 0.99 |
| 51409 | 0.55 |
| 51466 | 0.93 |
| 51643 | 1.00 |
| 51706 | 1.00 |
| 51809 | 0.90 |
| 54361 | 0.97 |
| 54502 | 0.98 |
| 54795 | 0.72 |
| 54837 | 1.00 |
| 54898 | 1.00 |
| 54961 | 0.86 |
| 55040 | 0.67 |
| 55107 | 0.52 |
| 55194 | 0.98 |
| 55450 | 0.97 |
| 55638 | 0.71 |
| 55673 | 0.99 |
| 55686 | 0.99 |
| 55712 | 0.91 |
| 55764 | 0.99 |
| 55930 | 0.52 |
| 56521 | 1.00 |
| 56654 | 0.57 |
| 57045 | 0.67 |
| 57241 | 0.55 |
| 57416 | 1.00 |
| 57419 | 0.74 |
| 57496 | 1.00 |
| 57535 | 0.96 |

|       |      |
|-------|------|
| 57613 | 1.00 |
| 57728 | 0.65 |
| 57758 | 1.00 |
| 57804 | 0.51 |
| 60481 | 0.87 |
| 60598 | 1.00 |
| 63931 | 0.99 |
| 64084 | 1.00 |
| 64769 | 0.51 |
| 64788 | 0.81 |
| 65055 | 0.59 |
| 79006 | 1.00 |
| 79025 | 0.51 |
| 79083 | 1.00 |
| 79137 | 0.69 |
| 79269 | 0.75 |
| 79570 | 0.91 |
| 79624 | 1.00 |
| 79702 | 1.00 |
| 80129 | 0.81 |
| 80736 | 1.00 |
| 84179 | 0.77 |
| 90355 | 1.00 |
| 92579 | 0.59 |

**Differentially expressed genes for  
HER2+ subtype from Andre et al.**

Gene ID    Frequency of appearance in the  
differentially expressed gene list  
from resampling (min = 0, max =  
1, cutoff = 0.5)

|      |      |
|------|------|
| 220  | 0.65 |
| 222  | 1.00 |
| 229  | 0.87 |
| 412  | 0.75 |
| 463  | 0.53 |
| 489  | 0.70 |
| 825  | 0.51 |
| 1056 | 0.62 |
| 1066 | 0.82 |
| 1123 | 0.50 |
| 1384 | 1.00 |
| 1442 | 0.83 |
| 1443 | 0.85 |
| 1444 | 0.51 |
| 1773 | 0.54 |
| 1805 | 0.88 |
| 1848 | 1.00 |
| 1910 | 0.59 |
| 1951 | 0.67 |
| 2064 | 1.00 |
| 2108 | 0.61 |
| 2264 | 0.53 |
| 2688 | 0.81 |
| 2870 | 0.55 |
| 2886 | 1.00 |
| 3117 | 1.00 |
| 3119 | 0.57 |
| 3263 | 0.56 |
| 3303 | 1.00 |
| 3357 | 0.56 |
| 3399 | 0.76 |
| 3418 | 0.59 |
| 3419 | 0.63 |
| 3502 | 1.00 |
| 3507 | 0.78 |
| 3514 | 1.00 |
| 3669 | 0.72 |
| 3755 | 0.56 |
| 3768 | 0.92 |
| 3784 | 0.52 |

|      |      |
|------|------|
| 3855 | 0.71 |
| 3887 | 1.00 |
| 3927 | 1.00 |
| 3949 | 0.75 |
| 4250 | 0.57 |
| 4294 | 0.94 |
| 4324 | 0.88 |
| 4613 | 1.00 |
| 4680 | 0.89 |
| 4849 | 0.88 |
| 4926 | 0.56 |
| 5001 | 0.79 |
| 5029 | 0.78 |
| 5130 | 0.90 |
| 5277 | 0.79 |
| 5304 | 0.69 |
| 5346 | 0.74 |
| 5371 | 0.78 |
| 5408 | 0.56 |
| 5409 | 1.00 |
| 5469 | 1.00 |
| 5514 | 0.95 |
| 5691 | 0.99 |
| 5709 | 1.00 |
| 5717 | 0.94 |
| 5741 | 0.84 |
| 5918 | 0.85 |
| 5988 | 0.75 |
| 6278 | 0.86 |
| 6319 | 0.50 |
| 6440 | 0.61 |
| 6522 | 0.74 |
| 6549 | 1.00 |
| 6636 | 0.88 |
| 6664 | 0.81 |
| 6857 | 0.82 |
| 7021 | 1.00 |
| 7031 | 0.51 |
| 7123 | 1.00 |
| 7177 | 0.58 |
| 7204 | 0.69 |
| 7329 | 0.75 |
| 7703 | 0.64 |
| 8273 | 0.53 |
| 8358 | 0.55 |
| 8396 | 0.96 |
| 8418 | 0.72 |



|       |      |
|-------|------|
| 8557  | 0.74 |
| 8564  | 0.77 |
| 8659  | 0.97 |
| 8714  | 0.97 |
| 8773  | 0.52 |
| 8776  | 0.88 |
| 8996  | 0.64 |
| 9031  | 0.64 |
| 9220  | 0.86 |
| 9235  | 0.68 |
| 9517  | 0.57 |
| 9635  | 1.00 |
| 9749  | 0.82 |
| 9751  | 0.58 |
| 9862  | 0.85 |
| 10093 | 0.85 |
| 10211 | 0.55 |
| 10321 | 0.89 |
| 10563 | 0.99 |
| 10612 | 0.51 |
| 10647 | 0.51 |
| 10677 | 0.78 |
| 10863 | 0.53 |
| 10938 | 0.83 |
| 10948 | 1.00 |
| 11063 | 0.84 |
| 11283 | 0.91 |
| 11322 | 0.84 |
| 22794 | 0.65 |
| 22904 | 0.60 |
| 23037 | 0.85 |
| 23075 | 0.62 |
| 23089 | 0.76 |
| 23106 | 1.00 |
| 23129 | 0.61 |
| 23289 | 0.96 |
| 23359 | 0.73 |
| 23462 | 0.53 |
| 23508 | 1.00 |
| 23600 | 0.87 |
| 26047 | 0.94 |
| 26051 | 0.52 |
| 26207 | 0.54 |
| 26236 | 0.73 |
| 27318 | 0.92 |
| 27324 | 0.97 |
| 28831 | 0.99 |

|        |      |
|--------|------|
| 29760  | 0.66 |
| 29844  | 0.53 |
| 30844  | 0.72 |
| 30850  | 0.93 |
| 50512  | 0.73 |
| 51237  | 1.00 |
| 51284  | 0.63 |
| 51755  | 0.95 |
| 51760  | 0.98 |
| 51806  | 0.94 |
| 53353  | 0.53 |
| 54187  | 0.74 |
| 54490  | 0.96 |
| 54795  | 0.82 |
| 55223  | 0.73 |
| 55673  | 0.62 |
| 55794  | 0.51 |
| 55876  | 1.00 |
| 55890  | 0.94 |
| 57099  | 0.63 |
| 57175  | 0.64 |
| 57485  | 0.69 |
| 79095  | 0.57 |
| 79152  | 0.80 |
| 79695  | 0.53 |
| 79838  | 0.98 |
| 79901  | 0.56 |
| 80237  | 0.70 |
| 93210  | 1.00 |
| 94009  | 0.95 |
| 114884 | 1.00 |

**Differentially expressed genes for TN  
subtype from Andre et al.**

Gene ID      Frequency of appearance in the  
differentially expressed gene list  
from resampling (min = 0, max =  
1, cutoff = 0.5)

|      |      |
|------|------|
| 119  | 0.72 |
| 123  | 0.73 |
| 204  | 0.79 |
| 301  | 0.56 |
| 419  | 0.91 |
| 445  | 1.00 |
| 800  | 0.52 |
| 827  | 0.61 |
| 871  | 0.95 |
| 1001 | 1.00 |
| 1029 | 1.00 |
| 1116 | 0.92 |
| 1117 | 1.00 |
| 1284 | 0.95 |
| 1299 | 0.99 |
| 1356 | 0.82 |
| 1381 | 0.95 |
| 1410 | 0.99 |
| 1466 | 1.00 |
| 1515 | 0.88 |
| 1612 | 1.00 |
| 1824 | 0.96 |
| 1956 | 1.00 |
| 2001 | 1.00 |
| 2019 | 1.00 |
| 2037 | 0.76 |
| 2139 | 0.56 |
| 2171 | 0.82 |
| 2173 | 0.95 |
| 2346 | 0.63 |
| 2558 | 0.81 |
| 2568 | 1.00 |
| 2619 | 1.00 |
| 2633 | 0.99 |
| 2707 | 1.00 |
| 2824 | 1.00 |
| 2950 | 1.00 |
| 3112 | 1.00 |
| 3126 | 0.52 |
| 3383 | 0.66 |

|      |      |
|------|------|
| 3400 | 1.00 |
| 3502 | 0.60 |
| 3507 | 0.73 |
| 3595 | 0.81 |
| 3627 | 0.93 |
| 3852 | 1.00 |
| 3854 | 1.00 |
| 3861 | 0.93 |
| 3868 | 1.00 |
| 3872 | 1.00 |
| 3928 | 1.00 |
| 4057 | 0.53 |
| 4068 | 0.63 |
| 4071 | 0.51 |
| 4162 | 0.99 |
| 4174 | 1.00 |
| 4233 | 0.99 |
| 4240 | 0.57 |
| 4281 | 0.99 |
| 4288 | 0.83 |
| 4316 | 1.00 |
| 4439 | 0.83 |
| 4478 | 0.59 |
| 4626 | 0.72 |
| 4781 | 1.00 |
| 4919 | 1.00 |
| 5214 | 0.58 |
| 5268 | 1.00 |
| 5294 | 0.61 |
| 5325 | 0.93 |
| 5329 | 0.55 |
| 5358 | 0.92 |
| 5613 | 1.00 |
| 5621 | 0.77 |
| 5653 | 0.85 |
| 5806 | 0.54 |
| 5918 | 1.00 |
| 5962 | 0.92 |
| 6273 | 0.53 |
| 6278 | 0.51 |
| 6289 | 0.99 |
| 6347 | 0.99 |
| 6368 | 0.64 |
| 6373 | 0.95 |
| 6422 | 1.00 |
| 6489 | 0.59 |
| 6491 | 0.97 |

|       |      |
|-------|------|
| 6518  | 0.61 |
| 6564  | 0.56 |
| 6566  | 0.51 |
| 6624  | 0.94 |
| 6663  | 0.99 |
| 6664  | 0.79 |
| 6732  | 0.61 |
| 6829  | 1.00 |
| 7368  | 1.00 |
| 7545  | 1.00 |
| 7804  | 0.68 |
| 7850  | 0.73 |
| 7851  | 1.00 |
| 8061  | 0.59 |
| 8190  | 1.00 |
| 8208  | 0.99 |
| 8317  | 0.98 |
| 8581  | 0.90 |
| 8645  | 1.00 |
| 8690  | 0.93 |
| 8767  | 0.77 |
| 8796  | 0.61 |
| 8842  | 1.00 |
| 9235  | 0.82 |
| 9401  | 0.56 |
| 9466  | 0.93 |
| 9469  | 0.99 |
| 9603  | 0.54 |
| 9654  | 1.00 |
| 9688  | 0.78 |
| 9833  | 0.55 |
| 9933  | 0.96 |
| 10155 | 0.58 |
| 10397 | 0.99 |
| 10469 | 0.68 |
| 10516 | 0.58 |
| 10537 | 0.80 |
| 10563 | 0.74 |
| 10644 | 0.98 |
| 10656 | 0.91 |
| 10855 | 0.83 |
| 10874 | 1.00 |
| 10876 | 0.55 |
| 10950 | 0.92 |
| 10964 | 0.71 |
| 11004 | 0.93 |
| 11013 | 1.00 |

|       |      |
|-------|------|
| 11182 | 0.63 |
| 11254 | 1.00 |
| 11341 | 0.99 |
| 22873 | 0.82 |
| 22974 | 0.97 |
| 23007 | 0.63 |
| 23175 | 1.00 |
| 23216 | 0.51 |
| 23266 | 0.78 |
| 23287 | 0.75 |
| 23321 | 0.97 |
| 23397 | 0.95 |
| 23432 | 0.69 |
| 23507 | 0.86 |
| 23650 | 1.00 |
| 23683 | 0.98 |
| 24149 | 0.88 |
| 25870 | 1.00 |
| 25907 | 1.00 |
| 25928 | 0.68 |
| 25937 | 1.00 |
| 25984 | 0.90 |
| 26227 | 0.93 |
| 27074 | 1.00 |
| 27234 | 0.97 |
| 28831 | 0.69 |
| 29015 | 1.00 |
| 29899 | 0.52 |
| 29967 | 0.56 |
| 29968 | 0.98 |
| 51029 | 0.70 |
| 51442 | 1.00 |
| 51806 | 1.00 |
| 53335 | 1.00 |
| 54763 | 0.87 |
| 54933 | 0.96 |
| 54954 | 0.99 |
| 55121 | 0.52 |
| 55765 | 0.64 |
| 55839 | 0.91 |
| 55975 | 0.90 |
| 56935 | 1.00 |
| 57820 | 0.54 |
| 63934 | 0.96 |
| 64778 | 0.60 |
| 65987 | 0.88 |
| 79156 | 0.96 |

|       |      |
|-------|------|
| 79605 | 0.97 |
| 79627 | 0.52 |
| 79709 | 1.00 |
| 79890 | 0.64 |
| 81557 | 0.59 |
| 81611 | 0.62 |
| 81618 | 0.94 |
| 83439 | 0.83 |
| 84752 | 0.85 |
| 85377 | 1.00 |
| 94025 | 0.64 |

**Differentially expressed genes for  
ER+ subtype from Neve et al.**

Gene ID    Frequency of appearance in the  
differentially expressed gene list  
from resampling (min = 0, max =  
1, cutoff = 0.5)

|      |      |
|------|------|
| 18   | 0.83 |
| 21   | 1.00 |
| 164  | 1.00 |
| 217  | 0.62 |
| 222  | 0.92 |
| 347  | 0.93 |
| 377  | 0.90 |
| 388  | 1.00 |
| 489  | 0.79 |
| 517  | 0.68 |
| 684  | 0.98 |
| 771  | 1.00 |
| 845  | 0.59 |
| 999  | 1.00 |
| 1041 | 0.74 |
| 1159 | 0.97 |
| 1191 | 0.91 |
| 1350 | 0.97 |
| 1363 | 1.00 |
| 1365 | 1.00 |
| 1374 | 0.98 |
| 1382 | 0.96 |
| 1396 | 1.00 |
| 1428 | 0.53 |
| 1509 | 0.80 |
| 1528 | 0.69 |
| 1534 | 0.99 |
| 1602 | 0.85 |
| 1917 | 0.90 |
| 1975 | 0.70 |
| 2013 | 0.75 |
| 2017 | 0.97 |
| 2029 | 0.99 |
| 2065 | 0.76 |
| 2099 | 1.00 |
| 2203 | 1.00 |
| 2264 | 0.86 |
| 2625 | 1.00 |
| 2690 | 0.51 |
| 2947 | 0.83 |



|      |      |
|------|------|
| 3017 | 0.84 |
| 3131 | 0.50 |
| 3169 | 1.00 |
| 3315 | 0.65 |
| 3382 | 0.85 |
| 3398 | 0.65 |
| 3485 | 1.00 |
| 3487 | 0.68 |
| 3625 | 0.92 |
| 3856 | 0.83 |
| 3875 | 0.82 |
| 3880 | 0.79 |
| 3964 | 0.78 |
| 4137 | 0.72 |
| 4147 | 0.66 |
| 4250 | 0.98 |
| 4329 | 1.00 |
| 4488 | 0.89 |
| 4582 | 1.00 |
| 4602 | 0.78 |
| 4666 | 0.52 |
| 4671 | 0.80 |
| 4925 | 0.76 |
| 5025 | 0.54 |
| 5053 | 0.58 |
| 5087 | 0.97 |
| 5094 | 0.99 |
| 5204 | 0.68 |
| 5265 | 0.56 |
| 5367 | 0.52 |
| 5379 | 0.58 |
| 5412 | 1.00 |
| 5571 | 0.58 |
| 5603 | 0.57 |
| 5625 | 0.89 |
| 5710 | 0.55 |
| 6199 | 1.00 |
| 6302 | 0.68 |
| 6414 | 1.00 |
| 6478 | 0.92 |
| 6506 | 0.62 |
| 6509 | 0.76 |
| 6833 | 0.67 |
| 7009 | 0.68 |
| 7031 | 1.00 |
| 7033 | 1.00 |
| 7057 | 0.50 |

|       |      |
|-------|------|
| 7108  | 0.86 |
| 7137  | 0.89 |
| 7227  | 0.98 |
| 7466  | 0.59 |
| 7494  | 1.00 |
| 7905  | 1.00 |
| 8161  | 0.64 |
| 8416  | 0.98 |
| 8500  | 0.95 |
| 8932  | 0.93 |
| 8991  | 1.00 |
| 9022  | 0.82 |
| 9060  | 0.55 |
| 9368  | 1.00 |
| 9482  | 0.75 |
| 9517  | 0.78 |
| 9529  | 0.68 |
| 9619  | 0.97 |
| 9674  | 0.61 |
| 9687  | 1.00 |
| 9716  | 0.60 |
| 9848  | 0.87 |
| 9865  | 0.75 |
| 9887  | 0.64 |
| 9919  | 0.59 |
| 10023 | 0.72 |
| 10040 | 0.55 |
| 10094 | 0.74 |
| 10102 | 1.00 |
| 10106 | 1.00 |
| 10140 | 1.00 |
| 10265 | 0.61 |
| 10388 | 0.60 |
| 10439 | 0.93 |
| 10512 | 0.99 |
| 10529 | 1.00 |
| 10551 | 1.00 |
| 10610 | 1.00 |
| 10647 | 0.56 |
| 10677 | 0.98 |
| 10899 | 0.99 |
| 10956 | 0.79 |
| 10974 | 1.00 |
| 11122 | 0.50 |
| 11153 | 0.89 |
| 11160 | 0.81 |
| 11212 | 0.64 |

|       |      |
|-------|------|
| 11226 | 1.00 |
| 22941 | 1.00 |
| 22992 | 1.00 |
| 22996 | 1.00 |
| 23041 | 1.00 |
| 23171 | 0.62 |
| 23185 | 0.66 |
| 23199 | 0.97 |
| 23242 | 0.76 |
| 23329 | 0.51 |
| 23339 | 0.67 |
| 23389 | 0.93 |
| 23522 | 0.94 |
| 23623 | 0.71 |
| 25800 | 0.99 |
| 25803 | 1.00 |
| 25924 | 0.66 |
| 26353 | 1.00 |
| 26471 | 0.50 |
| 27075 | 0.69 |
| 27134 | 0.56 |
| 27250 | 0.99 |
| 27324 | 0.87 |
| 29108 | 1.00 |
| 29760 | 0.59 |
| 29905 | 0.70 |
| 29956 | 0.68 |
| 29984 | 0.99 |
| 51015 | 0.60 |
| 51322 | 0.74 |
| 51644 | 0.72 |
| 54716 | 0.51 |
| 54794 | 0.88 |
| 54837 | 1.00 |
| 54869 | 0.74 |
| 54898 | 0.56 |
| 54961 | 0.92 |
| 55040 | 0.71 |
| 55291 | 0.98 |
| 55793 | 1.00 |
| 55930 | 0.93 |
| 56654 | 0.99 |
| 56967 | 0.53 |
| 57135 | 0.68 |
| 57402 | 0.95 |
| 57415 | 0.89 |
| 57416 | 1.00 |

|       |      |
|-------|------|
| 57419 | 0.75 |
| 57535 | 0.50 |
| 57663 | 0.58 |
| 64084 | 0.71 |
| 64757 | 1.00 |
| 79083 | 0.98 |
| 79170 | 0.57 |
| 79624 | 0.99 |
| 79666 | 1.00 |
| 79762 | 0.53 |
| 79767 | 0.59 |
| 79961 | 1.00 |
| 79962 | 0.94 |
| 80129 | 0.61 |
| 80134 | 0.65 |
| 80194 | 0.99 |
| 80223 | 1.00 |
| 80237 | 0.90 |
| 80303 | 0.90 |
| 80319 | 0.54 |
| 81031 | 1.00 |
| 84861 | 0.89 |
| 92595 | 0.73 |

**Differentially expressed genes for  
HER2+ subtype from Neve et al.**

Gene ID      Frequency of appearance in the  
differentially expressed gene list  
from resampling (min = 0, max =  
1, cutoff = 0.5)

|      |      |
|------|------|
| 217  | 1.00 |
| 222  | 1.00 |
| 226  | 0.65 |
| 230  | 1.00 |
| 388  | 0.83 |
| 397  | 0.51 |
| 489  | 1.00 |
| 563  | 1.00 |
| 934  | 1.00 |
| 999  | 1.00 |
| 1081 | 0.93 |
| 1114 | 0.56 |
| 1191 | 0.85 |
| 1201 | 1.00 |
| 1237 | 1.00 |
| 1298 | 0.97 |
| 1362 | 1.00 |
| 1363 | 1.00 |
| 1365 | 1.00 |
| 1397 | 0.58 |
| 1509 | 0.60 |
| 1543 | 0.76 |
| 1846 | 1.00 |
| 1848 | 0.73 |
| 1917 | 0.58 |
| 1942 | 0.54 |
| 1958 | 0.61 |
| 2052 | 0.56 |
| 2064 | 1.00 |
| 2065 | 0.52 |
| 2139 | 0.59 |
| 2179 | 0.62 |
| 2180 | 0.91 |
| 2203 | 0.93 |
| 2264 | 0.52 |
| 2539 | 0.99 |
| 2567 | 0.74 |
| 2678 | 0.88 |
| 2679 | 0.74 |
| 2752 | 0.51 |

|      |      |
|------|------|
| 2760 | 0.54 |
| 2778 | 0.68 |
| 2878 | 0.74 |
| 2886 | 1.00 |
| 2939 | 0.53 |
| 2940 | 0.62 |
| 2947 | 0.87 |
| 3169 | 0.90 |
| 3485 | 0.59 |
| 3625 | 0.80 |
| 3689 | 0.70 |
| 3851 | 0.74 |
| 3855 | 0.98 |
| 3856 | 0.77 |
| 3866 | 0.99 |
| 3875 | 0.72 |
| 3887 | 0.77 |
| 3934 | 0.73 |
| 3985 | 0.54 |
| 4102 | 0.72 |
| 4118 | 0.83 |
| 4151 | 0.89 |
| 4250 | 1.00 |
| 4256 | 0.99 |
| 4282 | 0.65 |
| 4301 | 0.91 |
| 4324 | 0.50 |
| 4477 | 0.68 |
| 4488 | 0.96 |
| 4582 | 0.64 |
| 4680 | 1.00 |
| 4689 | 0.59 |
| 4781 | 0.54 |
| 4891 | 0.81 |
| 5087 | 0.57 |
| 5127 | 0.75 |
| 5349 | 0.52 |
| 5447 | 0.97 |
| 5469 | 0.98 |
| 5569 | 0.88 |
| 5580 | 0.71 |
| 5625 | 0.74 |
| 5652 | 0.84 |
| 5709 | 0.69 |
| 5792 | 0.79 |
| 5909 | 0.88 |
| 5914 | 0.63 |

|      |      |
|------|------|
| 5920 | 0.72 |
| 6143 | 1.00 |
| 6185 | 0.73 |
| 6279 | 0.97 |
| 6280 | 1.00 |
| 6286 | 0.97 |
| 6303 | 0.57 |
| 6337 | 0.94 |
| 6376 | 0.77 |
| 6388 | 0.96 |
| 6414 | 0.53 |
| 6480 | 0.96 |
| 6576 | 0.52 |
| 6653 | 1.00 |
| 6830 | 1.00 |
| 6965 | 0.74 |
| 7031 | 1.00 |
| 7033 | 0.90 |
| 7074 | 0.51 |
| 7108 | 0.69 |
| 7126 | 1.00 |
| 7163 | 0.72 |
| 7351 | 0.98 |
| 7422 | 0.64 |
| 7442 | 0.70 |
| 7494 | 0.97 |
| 7728 | 0.57 |
| 7869 | 0.61 |
| 7904 | 0.96 |
| 7975 | 0.57 |
| 8418 | 0.62 |
| 8495 | 0.99 |
| 8557 | 0.77 |
| 8564 | 0.94 |
| 8635 | 0.99 |
| 8714 | 0.69 |
| 8800 | 0.63 |
| 8991 | 0.80 |
| 8997 | 0.68 |
| 9022 | 1.00 |
| 9121 | 0.82 |
| 9123 | 0.91 |
| 9145 | 0.51 |
| 9220 | 1.00 |
| 9518 | 1.00 |
| 9618 | 1.00 |
| 9681 | 0.98 |

|       |      |
|-------|------|
| 9703  | 1.00 |
| 9709  | 0.70 |
| 9848  | 0.75 |
| 9862  | 0.63 |
| 9865  | 0.83 |
| 9907  | 0.79 |
| 10140 | 0.69 |
| 10202 | 1.00 |
| 10214 | 0.58 |
| 10221 | 0.51 |
| 10397 | 0.95 |
| 10454 | 0.92 |
| 10457 | 0.94 |
| 10529 | 0.72 |
| 10551 | 1.00 |
| 10647 | 0.74 |
| 10948 | 1.00 |
| 10974 | 0.98 |
| 11013 | 0.61 |
| 11322 | 0.62 |
| 22834 | 0.72 |
| 22996 | 0.94 |
| 22998 | 0.71 |
| 23089 | 0.77 |
| 23106 | 1.00 |
| 23130 | 0.76 |
| 23171 | 0.58 |
| 23242 | 1.00 |
| 23381 | 0.66 |
| 23475 | 0.93 |
| 23650 | 0.72 |
| 23705 | 0.74 |
| 25803 | 0.99 |
| 25805 | 0.50 |
| 25984 | 0.99 |
| 26073 | 1.00 |
| 26088 | 0.66 |
| 26118 | 0.87 |
| 26173 | 0.78 |
| 26268 | 1.00 |
| 26284 | 1.00 |
| 27102 | 0.92 |
| 27156 | 0.63 |
| 27346 | 0.71 |
| 28957 | 0.54 |
| 28992 | 0.63 |
| 29796 | 0.55 |



|       |      |
|-------|------|
| 29923 | 0.57 |
| 50617 | 0.74 |
| 51314 | 0.57 |
| 51442 | 0.75 |
| 51755 | 1.00 |
| 51760 | 0.89 |
| 53840 | 1.00 |
| 54490 | 0.54 |
| 54795 | 0.63 |
| 54972 | 0.74 |
| 55090 | 0.98 |
| 55107 | 1.00 |
| 55187 | 0.85 |
| 55223 | 0.96 |
| 55412 | 1.00 |
| 55450 | 0.77 |
| 55611 | 0.55 |
| 55655 | 0.71 |
| 55731 | 0.95 |
| 55876 | 1.00 |
| 55911 | 0.81 |
| 55977 | 1.00 |
| 56834 | 0.95 |
| 57235 | 0.63 |
| 63970 | 0.77 |
| 64063 | 1.00 |
| 64788 | 0.56 |
| 64795 | 0.74 |
| 64856 | 0.74 |
| 65986 | 0.59 |
| 79170 | 0.71 |
| 79679 | 0.96 |
| 79820 | 0.95 |
| 79885 | 0.73 |
| 79888 | 0.93 |
| 79919 | 0.80 |
| 79932 | 0.68 |
| 80024 | 0.87 |
| 80221 | 0.94 |
| 80303 | 0.97 |
| 80344 | 0.73 |
| 80352 | 0.58 |
| 81031 | 0.92 |
| 81554 | 0.65 |
| 83451 | 0.69 |
| 91227 | 0.95 |
| 92086 | 0.59 |

|        |      |
|--------|------|
| 93210  | 1.00 |
| 112399 | 0.99 |

**Differentially expressed genes for TN  
subtype from Neve et al.**

Gene ID      Frequency of appearance in the  
differentially expressed gene list  
from resampling (min = 0, max =  
1, cutoff = 0.5)

|      |      |
|------|------|
| 136  | 0.94 |
| 182  | 1.00 |
| 220  | 0.66 |
| 231  | 1.00 |
| 244  | 0.89 |
| 301  | 1.00 |
| 558  | 0.92 |
| 800  | 1.00 |
| 822  | 0.89 |
| 857  | 1.00 |
| 858  | 1.00 |
| 960  | 1.00 |
| 991  | 0.72 |
| 1052 | 1.00 |
| 1075 | 0.89 |
| 1466 | 0.95 |
| 1490 | 0.58 |
| 1645 | 1.00 |
| 1646 | 1.00 |
| 1647 | 0.65 |
| 1806 | 1.00 |
| 1948 | 0.76 |
| 1956 | 1.00 |
| 1969 | 0.92 |
| 1984 | 1.00 |
| 2004 | 1.00 |
| 2012 | 1.00 |
| 2014 | 1.00 |
| 2119 | 0.51 |
| 2131 | 0.87 |
| 2171 | 1.00 |
| 2182 | 0.96 |
| 2202 | 0.66 |
| 2335 | 0.99 |
| 2512 | 0.59 |
| 2618 | 0.80 |
| 2744 | 1.00 |
| 2791 | 0.51 |
| 2876 | 0.93 |
| 2908 | 0.87 |

|      |      |
|------|------|
| 2950 | 1.00 |
| 2963 | 0.99 |
| 3105 | 0.61 |
| 3189 | 0.93 |
| 3371 | 0.81 |
| 3400 | 0.57 |
| 3428 | 0.92 |
| 3486 | 1.00 |
| 3490 | 1.00 |
| 3628 | 0.67 |
| 3685 | 0.58 |
| 3852 | 0.69 |
| 3945 | 1.00 |
| 3956 | 1.00 |
| 3992 | 0.63 |
| 4017 | 1.00 |
| 4067 | 0.96 |
| 4071 | 1.00 |
| 4082 | 0.97 |
| 4102 | 0.81 |
| 4154 | 0.82 |
| 4162 | 1.00 |
| 4166 | 1.00 |
| 4233 | 1.00 |
| 4277 | 0.53 |
| 4478 | 1.00 |
| 4501 | 0.78 |
| 4502 | 0.59 |
| 4664 | 0.78 |
| 4678 | 1.00 |
| 4837 | 1.00 |
| 4863 | 0.73 |
| 4907 | 0.70 |
| 5328 | 0.66 |
| 5358 | 1.00 |
| 5366 | 0.62 |
| 5378 | 0.78 |
| 5533 | 0.69 |
| 5621 | 1.00 |
| 5698 | 0.81 |
| 5793 | 0.91 |
| 5965 | 0.71 |
| 6273 | 1.00 |
| 6443 | 0.98 |
| 6446 | 1.00 |
| 6566 | 1.00 |
| 6590 | 0.73 |

|       |      |
|-------|------|
| 6591  | 0.93 |
| 6624  | 0.81 |
| 6646  | 0.79 |
| 6648  | 0.70 |
| 6672  | 1.00 |
| 6678  | 0.62 |
| 6732  | 0.70 |
| 6764  | 0.79 |
| 7040  | 0.99 |
| 7045  | 1.00 |
| 7048  | 1.00 |
| 7091  | 0.84 |
| 7169  | 1.00 |
| 7204  | 0.99 |
| 7378  | 1.00 |
| 7389  | 0.97 |
| 7431  | 1.00 |
| 7545  | 0.92 |
| 7846  | 0.79 |
| 7980  | 0.69 |
| 8061  | 1.00 |
| 8519  | 0.93 |
| 8540  | 1.00 |
| 8572  | 0.79 |
| 8644  | 0.93 |
| 8727  | 0.88 |
| 8781  | 0.66 |
| 8829  | 0.96 |
| 8898  | 1.00 |
| 9260  | 0.57 |
| 9263  | 0.86 |
| 9322  | 1.00 |
| 9448  | 0.97 |
| 9469  | 0.94 |
| 9532  | 1.00 |
| 9636  | 0.86 |
| 9702  | 0.73 |
| 9859  | 0.91 |
| 10019 | 0.66 |
| 10123 | 0.96 |
| 10147 | 0.93 |
| 10179 | 1.00 |
| 10186 | 0.52 |
| 10253 | 0.78 |
| 10398 | 0.63 |
| 10403 | 0.98 |
| 10409 | 0.72 |

|       |      |
|-------|------|
| 10410 | 0.72 |
| 10473 | 0.97 |
| 10602 | 0.94 |
| 10643 | 1.00 |
| 10644 | 1.00 |
| 10728 | 1.00 |
| 10946 | 1.00 |
| 10950 | 0.89 |
| 10979 | 0.98 |
| 11050 | 0.91 |
| 11080 | 0.60 |
| 11118 | 0.54 |
| 11167 | 1.00 |
| 11217 | 1.00 |
| 22800 | 0.89 |
| 22822 | 1.00 |
| 22873 | 0.86 |
| 22939 | 1.00 |
| 22943 | 0.85 |
| 23157 | 1.00 |
| 23393 | 0.87 |
| 23516 | 0.71 |
| 23530 | 0.73 |
| 23543 | 1.00 |
| 23548 | 0.65 |
| 23657 | 1.00 |
| 23764 | 0.61 |
| 25870 | 1.00 |
| 25932 | 1.00 |
| 25996 | 0.71 |
| 26009 | 0.61 |
| 26064 | 0.91 |
| 26872 | 0.90 |
| 27347 | 0.67 |
| 29015 | 0.86 |
| 29940 | 1.00 |
| 29968 | 1.00 |
| 29980 | 0.82 |
| 51170 | 0.56 |
| 51186 | 1.00 |
| 51232 | 1.00 |
| 53827 | 0.99 |
| 54933 | 0.58 |
| 55035 | 0.94 |
| 55071 | 0.74 |
| 55076 | 1.00 |
| 55214 | 1.00 |

|        |      |
|--------|------|
| 55326  | 0.66 |
| 55355  | 0.55 |
| 55589  | 0.62 |
| 55621  | 0.73 |
| 55700  | 0.54 |
| 55862  | 1.00 |
| 55975  | 0.86 |
| 56034  | 1.00 |
| 56912  | 1.00 |
| 64208  | 0.92 |
| 64778  | 0.84 |
| 79791  | 0.54 |
| 79890  | 1.00 |
| 79912  | 0.57 |
| 79971  | 0.64 |
| 84168  | 1.00 |
| 84617  | 1.00 |
| 84752  | 1.00 |
| 85453  | 1.00 |
| 113146 | 1.00 |
| 116496 | 0.98 |
| 140597 | 0.52 |
